# Supplementary material for: Identification of Key Ferroptosis-Related Genes in the Peripheral Blood of Patients with Relapsing-Remitting Multiple Sclerosis and Its Diagnostic Value
Source: MDPI journal article supplement (doi:10.3390/ijms24076399), 2023-03-29
Supplement: s1 [file s1]

**A**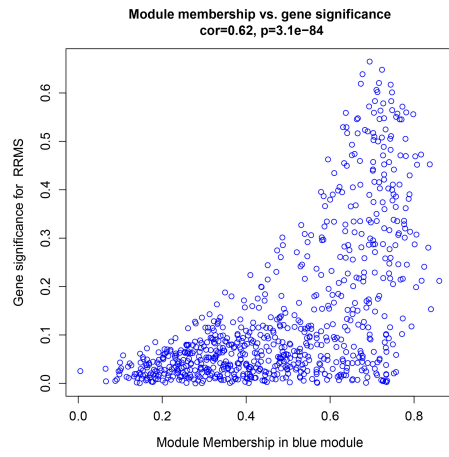**B**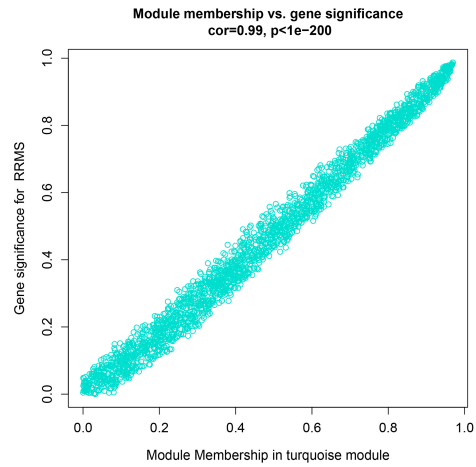

Supplementary File 4. Scatter plots were created to show the correlation between module membership and eigengenes in the blue and turquoise modules, and the gene significance for Relapsing-remitting multiple sclerosis.
