# Supplementary material for: Identification of Key Ferroptosis-Related Genes in the Peripheral Blood of Patients with Relapsing-Remitting Multiple Sclerosis and Its Diagnostic Value
Source: MDPI journal article supplement (doi:10.3390/ijms24076399), 2023-03-29
Supplement: s1 [file s1]

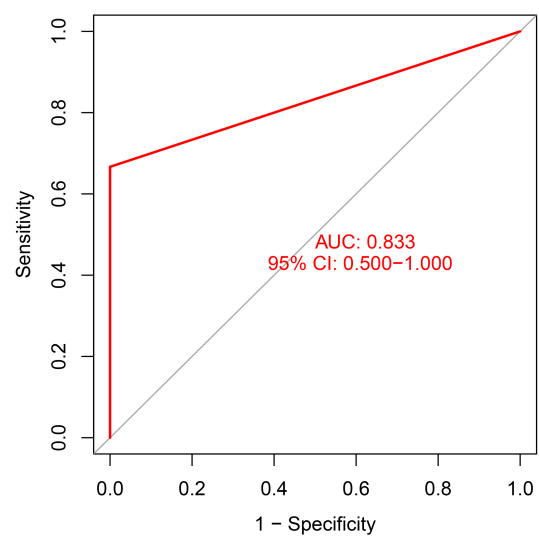

Supplementary File 8. The receiver operator characteristic analysis of the 5-gene based diagnostic model in GSE32915 dataset.
