# Supplementary material for: Identification of Key Ferroptosis-Related Genes in the Peripheral Blood of Patients with Relapsing-Remitting Multiple Sclerosis and Its Diagnostic Value
Source: Int J Mol Sci. 2023 Mar 29;24(7):6399. doi: 10.3390/ijms24076399 (PMC10094542; doi:10.3390/ijms24076399)
Supplement: Supplementary file 1 [file ijms-24-06399-s001.zip]

Archive with 9 entries (9 files):
- Supplementary File 1.xlsx
- Supplementary File 2.xlsx
- Supplementary File 3.xlsx
- Supplementary File 4.pdf
- Supplementary File 5.xlsx
- Supplementary File 6.xlsx
- Supplementary File 7.xlsx
- Supplementary File 8.pdf
- Supplementary File 9.xlsx
