# Supplementary material for: Identification of Key Ferroptosis-Related Genes in the Peripheral Blood of Patients with Relapsing-Remitting Multiple Sclerosis and Its Diagnostic Value
Source: Int J Mol Sci. 2023 Mar 29;24(7):6399. doi: 10.3390/ijms24076399 (PMC10094542; doi:10.3390/ijms24076399)
Supplement: Supplementary file 1 [file ijms-24-06399-s001.zip › Supplementary File 1.xlsx]

## Sheet: Sheet1
Supplementary File 1. The differentially expressed genes between the RRMS samples and healthy control samples.
Gene	conMean	treatMean	logFC	pvalue	Type
RPS25	0.485736	10.7084	10.2226	1.1041e-133	Up
RPS27A	0.602631	10.0522	9.44952	3.2498e-131	Up
RPS27	0.572921	9.88295	9.31003	1.0174e-122	Up
RPS10	0.577386	9.7463	9.16891	5.4663e-123	Up
RPS29	0.638551	9.45787	8.81932	2.1662e-124	Up
RPL30	0.595559	9.32379	8.72823	5.8738e-121	Up
RPL41	0.573369	9.20792	8.63456	2.0702e-119	Up
RPS14	0.553792	9.11155	8.55776	1.673e-124	Up
RPL36AL	0.401957	8.89	8.48805	2.7213e-126	Up
RPL39	0.473602	8.82426	8.35065	2.8006e-120	Up
RPS4X	0.627941	8.9144	8.28646	3.135e-126	Up
RPL27	0.539397	8.75516	8.21576	1.4168e-117	Up
FAU	0.632942	8.66783	8.03489	1.8692e-124	Up
RPL24	0.586784	8.59	8.00322	2.9968e-124	Up
RPS17	0.506516	8.16823	7.66171	1.393e-118	Up
NDUFA1	0.372922	7.94161	7.56869	1.6839e-124	Up
ANXA1	0.52298	7.82773	7.30475	2.3389e-122	Up
NLRP8	0.55156	7.58867	7.03711	7.2727e-126	Up
GZMH	0.583866	7.47238	6.88852	4.7747e-118	Up
SNRPD2	0.400497	7.22608	6.82559	1.7694e-123	Up
IGLL1	0.468173	7.2563	6.78813	9.4678e-122	Up
SRP14	0.523421	7.26958	6.74616	2.7887e-124	Up
LDHB	0.517047	7.21543	6.69838	1.5858e-122	Up
SOD1	0.968588	7.61655	6.64796	5.9293e-126	Up
ATP5O	0.37905	6.93633	6.55728	1.9995e-124	Up
CD3D	0.431798	6.97602	6.54422	3.6689e-123	Up
KLRB1	0.441558	6.9707	6.52914	1.0241e-121	Up
DNAJA1	0.466688	6.90183	6.43514	2.9896e-124	Up
PPP3R1	0.448792	6.86221	6.41342	1.7023e-124	Up
EIF2AK2	0.828593	7.19951	6.37092	9.1375e-119	Up
HERC5	0.921888	7.24218	6.32029	1.3491e-117	Up
HSP90AA1	0.442632	6.74085	6.29822	8.0658e-124	Up
LY6E	1.04293	7.2861	6.24317	4.9567e-119	Up
FCER1A	0.352677	6.58279	6.23011	7.6754e-126	Up
PRDX1	0.523688	6.75268	6.22899	1.6354e-124	Up
COX7A2	0.937461	7.16228	6.22482	1.4939e-112	Up
RNASE2	0.515313	6.56888	6.05357	3.2665e-117	Up
LCN2	0.583797	6.63483	6.05103	5.7106e-117	Up
ATP5F1	0.475395	6.44125	5.96585	2.9192e-124	Up
MDH1	0.81498	6.76559	5.95061	4.2209e-126	Up
S100A8	4.25719	10.1531	5.89589	4.7868e-124	Up
TMED4	0.723256	6.54376	5.8205	1.1386e-122	Up
COX17	0.468175	6.23472	5.76655	4.6359e-124	Up
CTSZ	0.429548	6.19144	5.7619	4.1816e-126	Up
DEFA4	0.371167	6.06793	5.69676	1.5944e-107	Up
IFI44	0.405631	6.08674	5.68111	5.3611e-122	Up
MRPL51	0.411635	6.08905	5.67741	1.5706e-124	Up
IFI44L	0.469321	6.13872	5.6694	7.7329e-119	Up
ATP5I	0.429572	6.05191	5.62234	4.1532e-123	Up
UQCRQ	0.454234	5.98235	5.52811	4.2199e-117	Up
HINT1	1.22958	6.65903	5.42945	3.1874e-116	Up
HLA-DQB1	6.71634	1.32338	5.39296	2.9256e-126	Down
PARK7	0.51609	5.85621	5.34012	2.7652e-125	Up
NDUFB2	1.12759	6.40981	5.28222	3.1038e-117	Up
MRPL33	0.991141	6.20415	5.21301	1.7336e-124	Up
DNAJC8	2.32974	7.48554	5.1558	1.8273e-125	Up
TIMM10	0.407175	5.55735	5.15017	2.2438e-124	Up
ATP5J	0.630705	5.77373	5.14302	1.5414e-124	Up
IFIT1	0.393923	5.49871	5.10479	4.1128e-107	Up
RPS4Y1	7.37178	2.28687	5.08491	1.85842e-61	Down
PSMC2	0.941385	5.97016	5.02878	4.3997e-124	Up
SHFM1	0.360164	5.35975	4.99959	1.5392e-123	Up
GIMAP7	1.71892	6.70047	4.98155	2.5512e-125	Up
GTF2H5	0.377528	5.31447	4.93695	4.0979e-123	Up
IFIT3	1.12786	6.03966	4.9118	1.7925e-117	Up
HSPE1	0.36257	5.26938	4.90681	1.5816e-124	Up
RPA3	0.421961	5.306	4.88404	4.9078e-122	Up
TAF15	1.96658	6.82956	4.86299	2.444e-123	Up
IGJ	0.42515	5.23569	4.81054	1.7305e-117	Up
EPSTI1	2.02353	6.78814	4.76461	2.3499e-114	Up
RSAD2	0.433423	5.1873	4.75388	6.789e-105	Up
FAM46C	8.95372	4.22353	4.73019	2.811e-125	Down
RPS24	1.63639	6.36654	4.73016	1.5028e-116	Up
TCN1	0.695911	5.40026	4.70435	9.0694e-117	Up
RPL6	4.46165	9.14588	4.68423	3.3216e-122	Up
IRF5	0.366139	5.0236	4.65746	1.4667e-124	Up
RPS18	3.52054	8.11161	4.59106	3.5937e-119	Up
SNRPG	1.5644	6.14521	4.58081	1.5639e-117	Up
RPL35	4.07796	8.65289	4.57493	3.1149e-116	Up
PTPLAD2	2.89289	7.40448	4.51159	6.1892e-109	Up
CTSG	0.353959	4.77387	4.41991	8.2465e-122	Up
KLHL28	1.09651	5.47387	4.37736	1.4735e-122	Up
EIF3E	4.22956	8.59525	4.36569	1.1035e-122	Up
RPL7	0.754359	5.09677	4.34241	2.8325e-119	Up
HBZ	5.88767	1.61605	4.27162	2.60506e-76	Down
C22orf34	0.32666	4.55285	4.22619	2.5552e-124	Up
TMEM158	6.65069	2.49592	4.15478	3.3181e-119	Down
ERH	1.13882	5.24674	4.10792	3.4453e-119	Up
NME1	0.374909	4.44873	4.07382	4.1276e-124	Up
EPC1	0.577404	4.63217	4.05477	4.5752e-125	Up
CAMP	2.52616	6.57293	4.04677	7.5974e-106	Up
HLA-DRB4	8.44016	4.49883	3.94133	3.6158e-120	Down
SLC5A8	0.884471	4.81343	3.92896	2.7855e-113	Up
RPS15A	4.05427	7.95393	3.89966	1.8271e-110	Up
NDUFS4	1.17301	5.0337	3.86068	1.1838e-120	Up
LSM5	0.943357	4.77089	3.82754	1.8502e-122	Up
HDC	1.00949	4.83362	3.82413	1.89044e-85	Up
MPO	0.361643	4.15888	3.79724	2.6819e-122	Up
BMP8B	0.420139	4.13703	3.71689	5.2336e-102	Up
MS4A6A	3.499	7.192	3.693	3.1331e-121	Up
ANKDD1A	1.17253	4.86257	3.69004	4.55e-113	Up
FCER1G	5.33392	9.01118	3.67726	1.0859e-124	Up
EVI5	2.55611	6.22443	3.66832	9.8563e-109	Up
CD3G	2.59373	6.2366	3.64287	1.0291e-119	Up
DBI	1.42251	5.05234	3.62983	6.6485e-116	Up
RPL9	3.15262	6.77731	3.62469	1.4955e-107	Up
SLC4A5	2.15109	5.75844	3.60735	1.7722e-114	Up
ORM1	1.19733	4.79448	3.59715	1.1393e-77	Up
CA1	6.74501	3.20153	3.54347	1.5174e-113	Down
RPL11	6.04595	9.56243	3.51648	8.1862e-124	Up
COX7C	3.13102	6.63231	3.50129	7.4367e-112	Up
TXN	3.14322	6.64212	3.49891	1.592e-118	Up
CPA3	0.465503	3.96169	3.49619	1.7328e-105	Up
TMCO1	2.05711	5.54231	3.48521	1.0147e-113	Up
NDUFS3	2.98719	6.46116	3.47397	1.0221e-124	Up
TCEAL8	1.10097	4.55678	3.45582	2.4478e-123	Up
OAS3	1.39291	4.81853	3.42563	1.9233e-108	Up
GNL2	2.05922	5.48413	3.42491	2.1787e-122	Up
RNASE3	0.552176	3.93839	3.38622	4.12854e-65	Up
ZNF223	3.36258	6.74878	3.3862	3.7897e-108	Up
MRPS22	1.95959	5.33553	3.37594	2.2087e-122	Up
PRTN3	0.34919	3.71812	3.36893	6.2633e-125	Up
MFHAS1	1.0996	4.46169	3.36209	8.5271e-125	Up
RPL12	5.69439	9.04924	3.35485	5.8589e-124	Up
KRT72	1.31809	4.66833	3.35023	1.04279e-93	Up
EMG1	1.50531	4.8288	3.32349	2.6974e-121	Up
ZDHHC19	0.39293	3.70169	3.30876	1.5663e-123	Up
LTF	0.610723	3.91278	3.30205	7.75547e-72	Up
AZU1	0.43331	3.72668	3.29337	2.0454e-108	Up
SLC45A3	0.749848	4.03643	3.28658	5.9238e-114	Up
BOLA2	2.2215	5.48207	3.26057	9.7354e-124	Up
ICA1	1.78172	5.01407	3.23235	4.053e-114	Up
CCDC71	0.330638	3.55242	3.22179	3.2798e-120	Up
RPS5	6.23497	9.43296	3.19799	6.886e-125	Up
GALM	1.82122	5.00843	3.18722	1.7706e-124	Up
RPL35A	5.73121	8.9127	3.1815	9.8395e-122	Up
XK	5.67559	2.5105	3.16509	1.8222e-113	Down
C12orf57	3.62609	6.76902	3.14292	9.06e-122	Up
SDF2L1	2.71382	5.82966	3.11583	5.1171e-124	Up
METAP2	2.59469	5.7065	3.11182	6.315e-123	Up
CACNA1I	0.942627	4.03981	3.09718	1.7283e-120	Up
ENY2	1.89175	4.97595	3.0842	1.1556e-107	Up
SFMBT2	0.70064	3.78195	3.08131	6.6913e-116	Up
UCHL3	1.44711	4.50311	3.056	5.5291e-119	Up
TRAPPC2L	2.90145	5.93458	3.03313	1.0982e-125	Up
RPL32	5.39052	8.41642	3.0259	1.7209e-121	Up
TMEM70	0.673471	3.6981	3.02463	9.9775e-114	Up
ATP6V1D	2.8823	5.90255	3.02024	1.1981e-118	Up
ZFP36L1	8.38724	5.37399	3.01325	3.3137e-126	Down
TNFRSF17	0.413277	3.38888	2.9756	1.2252e-105	Up
GZMM	2.23917	5.21272	2.97355	6.9885e-115	Up
ACAT1	1.82462	4.79329	2.96867	6.681e-122	Up
MDM4	1.6892	4.65386	2.96466	4.8622e-120	Up
MX1	6.01156	8.9756	2.96404	1.2341e-110	Up
DLST	2.20488	5.15288	2.948	2.5891e-126	Up
SNAPC1	1.22443	4.17058	2.94615	1.38527e-92	Up
YOD1	5.37345	2.44028	2.93317	2.8183e-119	Down
MS4A3	0.537383	3.46699	2.92961	4.45696e-99	Up
RAB33B	5.75829	2.83348	2.92481	2.6472e-123	Down
SS18L2	4.16223	7.07997	2.91774	1.0282e-119	Up
CEACAM8	1.39076	4.28793	2.89716	3.67076e-43	Up
CLEC12A	6.20034	3.30907	2.89127	2.22466e-97	Down
PCDHB9	1.9013	4.76741	2.86611	2.5256e-111	Up
SHROOM4	4.42505	7.29026	2.86521	4.3807e-118	Up
RPS21	1.95198	4.79839	2.84641	1.4647e-117	Up
ZNF740	0.501205	3.34263	2.84142	6.7205e-125	Up
ITM2A	3.40263	6.24133	2.8387	3.8546e-122	Up
TMOD1	6.20966	3.37533	2.83433	7.4326e-114	Down
MRPS18C	1.18484	4.01711	2.83227	2.9716e-107	Up
BNIP3L	6.85222	4.02849	2.82373	1.5754e-125	Down
PRKY	4.3372	1.51895	2.81825	6.66761e-42	Down
MRPL36	2.46082	5.27395	2.81312	2.2034e-120	Up
GYPB	6.01341	3.20387	2.80954	6.6614e-107	Down
CBX6	3.36481	6.17277	2.80796	1.7716e-125	Up
PSMA3	1.72244	4.51765	2.79521	1.7882e-123	Up
ATP1B2	1.30963	4.08269	2.77306	5.7847e-125	Up
CWF19L2	1.60483	4.36857	2.76374	1.1611e-120	Up
CDKN1C	5.10819	2.3484	2.7598	2.934e-120	Down
AIF1	4.22292	6.97435	2.75143	4.6121e-121	Up
COX5B	5.06575	7.80095	2.7352	2.4343e-123	Up
RPS6	6.4813	9.21393	2.73263	3.9066e-123	Up
HES4	2.02866	4.75212	2.72345	4.9967e-108	Up
RPA4	0.573831	3.28647	2.71264	5.6052e-126	Up
ISG15	2.08816	4.78203	2.69387	1.34921e-70	Up
RAP1GAP	5.59189	2.90393	2.68795	3.13051e-70	Down
TACSTD2	0.52606	3.21002	2.68396	1.175e-116	Up
OSBP2	6.48626	3.80622	2.68004	1.3135e-112	Down
IKZF3	2.21951	4.89938	2.67988	1.2795e-115	Up
AVPI1	0.94917	3.60239	2.65322	1.1413e-121	Up
PLA2G2D	2.29243	4.93164	2.63921	1.3356e-113	Up
PLRG1	2.77417	5.40999	2.63582	1.7761e-123	Up
SLC6A8	5.97316	3.34574	2.62741	9.441e-116	Down
F2RL1	6.02351	3.39662	2.62689	4.3636e-125	Down
EIF1AY	4.36683	1.74488	2.62196	3.26968e-33	Down
ARG1	0.96318	3.57655	2.61337	2.19575e-82	Up
NKX3-1	4.78767	2.19426	2.59341	3.30215e-56	Down
NDUFB7	3.17589	5.76193	2.58604	1.0065e-122	Up
TNFAIP6	2.44481	5.01155	2.56674	3.39931e-85	Up
MTHFR	2.00698	4.57037	2.56338	1.7055e-120	Up
ZFP42	0.722658	3.27784	2.55518	1.0475e-116	Up
OLFM4	0.900601	3.4535	2.5529	1.91037e-34	Up
ENSA	1.69905	4.23523	2.53618	9.3562e-125	Up
SIGLEC10	7.87176	5.33846	2.5333	2.3698e-125	Down
MCM8	5.17385	7.70652	2.53267	9.9182e-117	Up
FECH	5.25734	2.75613	2.50121	1.13017e-90	Down
CISD1	3.07236	5.56347	2.4911	2.2542e-122	Up
MRPS33	1.79659	4.28359	2.487	1.2973e-123	Up
PSMA4	2.85251	5.33442	2.48191	4.2395e-112	Up
HIST1H1C	6.71102	4.23667	2.47435	4.9835e-126	Down
RHOB	5.90781	3.44492	2.46289	2.5126e-122	Down
GM2A	1.58371	4.03912	2.45542	8.1606e-109	Up
SESN3	6.52524	4.07262	2.45262	1.0408e-116	Down
ATP5L	4.19107	6.63725	2.44619	1.0702e-120	Up
CEBPZ	3.27966	5.70241	2.42276	7.8285e-118	Up
NPCDR1	1.76489	4.18008	2.41519	2.7731e-73	Up
TUBB1	8.31492	5.89979	2.41513	2.226e-125	Down
NUBPL	5.0585	7.47318	2.41468	1.6373e-119	Up
POLR3GL	3.97045	6.37964	2.40918	9.309e-124	Up
ZNF652	4.62934	7.03294	2.4036	8.6826e-123	Up
SNRPB2	3.50622	5.90798	2.40176	3.1181e-123	Up
ANKRD55	2.12072	4.51908	2.39836	2.8771e-108	Up
RCAN2	0.499852	2.89818	2.39833	6.1053e-121	Up
CHPT1	6.70809	4.31103	2.39706	4.9187e-122	Down
MRPL50	1.45944	3.84726	2.38782	1.7545e-101	Up
TIMM22	3.55095	5.93297	2.38202	9.0991e-125	Up
LAIR2	4.7186	2.34608	2.37252	8.56834e-59	Down
PSMB7	3.40996	5.77149	2.36153	2.9736e-118	Up
CYP26B1	0.623298	2.98168	2.35838	9.296e-112	Up
SDPR	6.63806	4.28068	2.35739	1.4615e-121	Down
FAM107B	4.64441	6.9954	2.351	2.5304e-123	Up
VIPR1	3.25985	5.60253	2.34268	1.5614e-122	Up
RNF11	5.45419	3.11834	2.33585	3.6358e-123	Down
TTC5	2.36042	4.69273	2.33231	2.3101e-123	Up
ADAM17	2.30444	4.62991	2.32548	6.7153e-118	Up
PTPRCAP	4.2438	6.56909	2.3253	3.5767e-120	Up
XAF1	3.5647	5.88972	2.32501	5.0829e-114	Up
RBM39	2.93358	5.24738	2.3138	5.401e-125	Up
POLR2C	2.87663	5.18923	2.3126	2.2245e-123	Up
FLJ38717	3.65192	5.96351	2.31159	3.4325e-117	Up
SEC11A	4.34155	6.65137	2.30982	1.9265e-124	Up
AHR	5.88931	8.19749	2.30817	2.6364e-117	Up
LGI4	0.391767	2.67074	2.27897	5.3675e-126	Up
ZNF641	4.06159	6.34026	2.27867	4.4713e-116	Up
NOV	5.86706	3.58932	2.27775	9.6863e-120	Down
RETN	1.17852	3.45273	2.27422	1.87506e-94	Up
LSM3	1.79652	4.06392	2.2674	5.83615e-50	Up
TAOK1	3.24071	5.49302	2.25231	4.0392e-111	Up
CEACAM6	0.48487	2.72236	2.23749	7.17287e-33	Up
SSR4	5.52662	7.75621	2.2296	3.0907e-126	Up
RUNDC3A	5.38469	3.15778	2.22691	5.13672e-79	Down
CLEC2D	4.84579	7.06288	2.21709	1.4951e-123	Up
GPRC5D	0.428425	2.64506	2.21664	8.6801e-123	Up
ITIH4	1.23084	3.44442	2.21358	1.3197e-120	Up
IGF2BP2	6.78175	4.57	2.21175	5.5798e-116	Down
VASH1	4.99045	2.78087	2.20958	5.6383e-122	Down
DPM1	3.19103	5.39691	2.20589	3.4788e-117	Up
MAP7	4.528	2.32268	2.20532	2.4667e-125	Down
ESAM	4.85322	2.65097	2.20225	3.6439e-97	Down
NR2C2	6.00354	3.80429	2.19925	1.034e-121	Down
PSMB1	5.50927	7.70423	2.19497	1.9933e-123	Up
PTGDS	5.36898	3.1809	2.18808	3.69767e-94	Down
TNS1	6.51658	4.3327	2.18388	9.0323e-107	Down
RPL10A	6.9849	9.16702	2.18211	1.6029e-123	Up
SLC2A5	1.32627	3.50733	2.18106	4.9228e-116	Up
GSTO1	5.0067	7.18716	2.18046	7.7374e-119	Up
ENC1	4.69963	2.52371	2.17592	1.41854e-69	Down
PLEK2	5.27406	3.1084	2.16566	1.12354e-93	Down
C19orf53	3.95004	6.10702	2.15698	1.1609e-122	Up
CTSW	3.99273	6.14586	2.15312	1.1445e-117	Up
HSP90B1	5.11809	7.2691	2.15101	1.0613e-123	Up
NAT8B	4.59983	2.44901	2.15082	1.24632e-49	Down
COMMD3	4.23484	6.38304	2.1482	3.2438e-118	Up
MBNL3	6.41148	4.2658	2.14568	3.518e-120	Down
F13A1	6.96044	4.82236	2.13809	1.2887e-122	Down
USP33	2.24008	4.37375	2.13367	2.4649e-123	Up
MMP8	0.355475	2.48881	2.13334	2.71e-83	Up
MTMR6	6.02961	3.89828	2.13133	5.1267e-126	Down
PSMB6	5.23976	7.36968	2.12992	1.2232e-122	Up
NF1	1.37208	3.50124	2.12915	8.8407e-126	Up
ZNF683	2.48698	4.60876	2.12178	2.98514e-47	Up
SRP19	2.7266	4.84838	2.12177	3.515e-118	Up
RNF141	4.99517	2.87968	2.11548	8.9645e-126	Down
CA2	6.05136	3.93595	2.11542	2.4098e-124	Down
SELENBP1	7.39565	5.28063	2.11503	3.3674e-111	Down
RIOK2	1.97284	4.08626	2.11342	4.5307e-120	Up
TREML2	5.91975	3.80774	2.11201	1.6093e-125	Down
ALDH5A1	5.15992	3.0519	2.10802	4.4861e-125	Down
MMD	6.6144	4.50723	2.10717	3.0713e-125	Down
RPS3	7.85054	9.9502	2.09966	2.3105e-124	Up
MCOLN2	3.17329	5.26592	2.09263	7.5476e-113	Up
AIM2	2.34094	4.42972	2.08878	7.3508e-107	Up
NDUFB3	2.99528	5.0753	2.08003	1.71123e-61	Up
LGALS1	6.01087	8.08673	2.07586	2.6194e-118	Up
GYPE	4.94614	2.87213	2.07401	3.90461e-82	Down
PJA2	8.24599	6.18275	2.06324	5.1664e-124	Down
RPS12	8.83146	10.8926	2.06112	7.4879e-133	Up
PANX2	6.71339	4.65262	2.06077	8.6301e-124	Down
CCL23	3.68046	1.61994	2.06052	1.55039e-52	Down
ZNF582	2.94882	0.894635	2.05418	2.1452e-119	Down
PTGS2	6.24393	4.193	2.05093	7.5464e-119	Down
CCT2	2.99506	5.04597	2.05091	9.4734e-116	Up
HIST1H2BC	5.24417	3.19514	2.04903	1.3699e-123	Down
MRPS7	2.77631	4.82221	2.0459	2.4794e-120	Up
POMP	4.17869	6.21933	2.04065	6.1434e-123	Up
TRIP4	2.94972	4.98344	2.03372	3.0244e-120	Up
LSM11	0.866395	2.89736	2.03097	4.8751e-124	Up
BPGM	4.77194	2.74101	2.03092	5.43146e-80	Down
RAVER2	3.14107	1.11162	2.02945	8.94796e-77	Down
GDPD5	2.61963	4.64835	2.02873	2.9924e-107	Up
TRA2A	4.07416	6.10207	2.0279	3.556e-126	Up
STOML2	3.31523	5.34191	2.02668	2.3982e-123	Up
MKRN1	10.0921	8.06591	2.0262	8.8829e-125	Down
C11orf1	1.54409	3.56882	2.02473	4.8102e-116	Up
PPHLN1	3.01937	5.04184	2.02247	3.2741e-126	Up
HEMGN	4.93536	2.91518	2.02018	3.93714e-84	Down
CALML4	2.48189	4.49648	2.01459	1.5693e-121	Up
ANKRD30B	6.88899	8.89749	2.0085	8.4989e-112	Up
TGFA	5.02649	3.01913	2.00736	3.1815e-125	Down
PPP1R9B	1.50384	3.50911	2.00528	3.0661e-123	Up
BMP6	4.15927	2.16155	1.99772	3.7321e-121	Down
FLI1	5.07459	3.07943	1.99516	3.5779e-122	Down
PRSS33	4.82662	2.84178	1.98484	6.34287e-60	Down
COX19	4.40706	6.38357	1.97651	5.8445e-116	Up
DRG1	3.29601	5.26058	1.96457	1.1744e-118	Up
H2AFZ	5.97532	7.92714	1.95182	2.7574e-121	Up
CNGB1	1.69788	3.64547	1.9476	2.0074e-106	Up
CD96	4.35047	6.29778	1.94731	2.6437e-119	Up
ICT1	2.50914	4.45431	1.94516	8.569e-121	Up
ALPP	6.65969	8.59929	1.9396	3.5927e-109	Up
ALCAM	4.7797	2.84059	1.93911	1.0058e-111	Down
OLIG2	4.3858	2.44936	1.93645	1.58047e-49	Down
RARS	3.66295	5.59835	1.9354	3.0628e-124	Up
SNX10	6.64607	4.71482	1.93125	3.323e-124	Down
CDC34	6.89109	4.96048	1.93061	1.9242e-120	Down
PFDN5	5.19578	7.12568	1.92991	2.2854e-108	Up
VAV3	5.11432	3.1887	1.92562	1.0152e-117	Down
BCL2L1	8.35209	6.42993	1.92215	8.2644e-112	Down
TOB1	3.86473	5.7863	1.92157	9.8695e-124	Up
GMPR	6.57687	4.6571	1.91977	7.8995e-104	Down
NCOA4	10.5106	8.59198	1.91862	5.2702e-127	Down
XIST	2.62709	4.54329	1.9162	3.41741e-34	Up
IVL	3.03882	1.12336	1.91546	1.1217e-122	Down
TLR1	6.64858	4.73736	1.91122	2.2391e-120	Down
SCGN	3.86936	1.95921	1.91015	1.7533e-118	Down
CCDC53	3.49558	5.40559	1.91001	1.4842e-118	Up
WDR74	3.17534	5.08077	1.90543	2.7829e-124	Up
PHOSPHO1	5.72457	3.81949	1.90508	5.1854e-112	Down
IL10	5.57745	7.48133	1.90388	1.6208e-107	Up
OLR1	1.04105	2.93966	1.89861	7.88002e-93	Up
TMSB10	8.11193	10.0088	1.89688	4.2029e-124	Up
GATA1	4.79686	2.904	1.89286	1.18441e-56	Down
CD8A	5.12958	7.01926	1.88968	1.0382e-111	Up
ZNF763	1.87835	3.76773	1.88938	1.59797e-74	Up
LY96	6.18749	4.29841	1.88908	7.23297e-58	Down
NOSIP	5.59349	7.48092	1.88743	1.3023e-123	Up
CAMK1G	3.63572	1.74995	1.88577	3.21642e-99	Down
ZNF57	1.27269	3.1578	1.88511	8.61941e-53	Up
L2HGDH	1.61926	3.50384	1.88458	1.9345e-122	Up
SPRYD3	8.88614	7.00498	1.88116	6.4279e-116	Down
FAM83F	3.55394	1.6735	1.88044	2.99391e-100	Down
CCDC15	1.36415	3.24323	1.87908	2.7065e-112	Up
FCHO2	4.59783	2.71889	1.87894	7.7333e-107	Down
ABCC4	4.11768	2.23877	1.87891	1.1419e-112	Down
ZCCHC6	3.18995	5.06803	1.87809	7.6299e-109	Up
DNAJA4	6.14283	4.26501	1.87782	7.3059e-125	Down
FOXO4	6.90149	5.02446	1.87703	6.4005e-120	Down
TBCA	4.90363	6.77756	1.87393	4.045e-121	Up
DPYSL4	3.19565	1.32408	1.87157	8.10299e-64	Down
SPTBN5	3.17686	1.30762	1.86925	5.18692e-77	Down
NUP37	3.1848	5.04374	1.85894	7.4858e-121	Up
SLC25A19	2.45394	4.30983	1.85589	4.17441e-100	Up
RAD51	2.14348	3.99217	1.84869	9.1181e-105	Up
LARP7	2.38956	4.23346	1.84389	1.7165e-115	Up
PIK3AP1	5.79531	3.95386	1.84145	8.1724e-121	Down
SEC11C	2.55643	4.3978	1.84138	5.4488e-117	Up
FBXO33	6.44597	4.60488	1.84109	3.5549e-126	Down
DCUN1D1	5.38182	3.54115	1.84067	1.8092e-121	Down
PPP2R5B	5.10301	3.26423	1.83877	4.50721e-100	Down
PITPNM1	4.79194	6.62991	1.83797	5.486e-120	Up
SUB1	2.26241	4.09972	1.83731	1.3807e-73	Up
ITLN1	3.65272	1.81674	1.83598	6.92007e-43	Down
ANKRD9	4.76639	2.933	1.8334	1.84222e-77	Down
EIF3D	5.50365	7.33602	1.83237	1.3716e-121	Up
PDE7A	3.39565	5.2272	1.83155	4.7755e-123	Up
KIAA0319	1.52556	3.3553	1.82975	4.8124e-112	Up
PBX2	4.16135	5.98443	1.82308	4.4159e-119	Up
GTF2B	3.35049	5.17151	1.82102	1.631e-113	Up
ATP5J2	4.60104	6.4212	1.82016	1.2928e-119	Up
AP1S1	1.45677	3.27366	1.81689	3.1662e-122	Up
SIRPB1	5.84829	4.03425	1.81404	6.1527e-121	Down
LEP	2.63358	4.44607	1.81249	1.3704e-108	Up
YPEL3	8.85083	7.04706	1.80376	2.3936e-126	Down
HLA-DRB6	7.55383	5.75134	1.8025	8.2625e-110	Down
MS4A2	1.3385	3.14014	1.80164	4.1638e-109	Up
SNCA	8.70014	6.89978	1.80035	3.5819e-109	Down
EIF1B	7.44601	5.64783	1.79818	3.7641e-126	Down
TTC1	3.59773	5.39213	1.79441	2.7862e-123	Up
DNAJC7	3.27452	5.06116	1.78664	2.9294e-125	Up
ACY1	3.48049	1.69529	1.7852	1.57251e-99	Down
SHOC2	5.73086	3.94973	1.78113	8.1261e-125	Down
NEK8	1.86456	3.63265	1.76809	8.1971e-117	Up
NDUFA13	4.43229	6.19943	1.76714	2.0775e-121	Up
GPR146	4.94124	3.17456	1.76668	1.08521e-71	Down
ILF2	4.75805	6.52102	1.76297	5.8057e-124	Up
TXNDC17	3.97915	5.74192	1.76277	6.1949e-105	Up
BAMBI	3.26886	1.51008	1.75878	1.8931e-89	Down
KRT73	1.9189	3.67724	1.75834	2.10135e-97	Up
CCDC140	3.48049	1.726	1.75448	7.07017e-99	Down
TUBB2A	4.38205	2.62973	1.75233	1.33969e-19	Down
ATP6V1E1	5.44486	7.19558	1.75073	1.5569e-114	Up
TRIM52	3.07942	4.8295	1.75009	3.9018e-119	Up
SELM	2.28701	4.03465	1.74764	3.8204e-112	Up
PI3	6.44438	8.19177	1.74739	1.5566e-102	Up
RPAIN	4.06531	5.81193	1.74662	8.7324e-125	Up
KANK2	2.9997	1.2543	1.7454	9.43777e-80	Down
ARPC5	9.14185	7.39704	1.7448	1.8526e-126	Down
ZMYND19	2.35317	4.09678	1.74361	2.372e-121	Up
GZMA	4.7318	6.47522	1.74342	2.4334e-107	Up
RWDD1	2.99302	4.73545	1.74243	8.19123e-99	Up
CHST12	2.69848	4.44065	1.74217	5.9443e-116	Up
CD2	5.76949	7.51143	1.74195	1.0993e-120	Up
DARS	5.60694	7.3485	1.74156	1.9826e-123	Up
GLTSCR2	8.01406	9.75344	1.73938	5.2094e-125	Up
CASP5	2.06802	3.80548	1.73746	4.80398e-66	Up
ZNF346	2.17879	3.90945	1.73065	2.9808e-124	Up
UPF3B	2.30642	4.03426	1.72784	1.6601e-120	Up
SEC14L1	7.18666	5.46293	1.72374	2.1907e-125	Down
PWP1	3.7377	5.4611	1.7234	2.3132e-124	Up
FBXL16	2.33733	4.05993	1.7226	2.4307e-113	Up
TMCC2	4.26762	2.54526	1.72236	9.4523e-113	Down
TTC17	3.32164	5.04209	1.72045	1.0521e-122	Up
DAPK3	3.40442	1.6861	1.71833	3.07221e-99	Down
TMEM55A	5.83921	4.12143	1.71778	1.3788e-118	Down
GZMB	5.64011	7.356	1.71589	3.195e-111	Up
ORMDL3	5.59412	3.88026	1.71386	1.4321e-123	Down
PDK4	4.7735	3.06273	1.71077	7.70787e-97	Down
SRFBP1	2.41747	4.12297	1.7055	6.55927e-87	Up
NAB1	5.14536	3.44213	1.70322	1.4082e-121	Down
HIST1H2BJ	3.20916	4.91063	1.70147	1.4565e-108	Up
CCR3	5.95501	4.25425	1.70075	1.257e-108	Down
MED25	6.88448	5.18411	1.70037	4.4496e-123	Down
ZBTB40	3.84409	5.54082	1.69673	9.0151e-116	Up
TOP1P2	4.78578	3.08937	1.69642	3.3612e-123	Down
RPLP0	5.50619	7.20096	1.69477	2.2449e-113	Up
PSMC3	3.81557	5.50744	1.69187	5.2115e-118	Up
SSB	2.83027	4.52067	1.69041	6.424e-123	Up
RHOA	9.43174	7.74224	1.6895	1.7133e-126	Down
RBBP6	2.31419	4.00181	1.68762	5.98e-123	Up
SNRPF	4.35988	6.0462	1.68632	2.914e-120	Up
SPNS1	3.41578	5.0988	1.68301	1.3753e-116	Up
CST7	5.45991	7.1421	1.6822	2.2743e-113	Up
TSPAN1	3.30985	1.62995	1.6799	2.27757e-100	Down
MRPL48	2.34023	4.01804	1.67781	2.4681e-108	Up
CLDND2	2.77084	4.44432	1.67348	1.19258e-97	Up
RALGDS	4.72216	6.39394	1.67178	9.4178e-113	Up
ARF3	6.79342	5.12298	1.67043	2.1574e-125	Down
IGFBP1	3.33473	1.66621	1.66852	1.10923e-99	Down
IFT74	1.60109	3.26842	1.66734	4.197e-110	Up
USP38	6.29953	4.63351	1.66601	1.3827e-125	Down
JUP	3.9263	2.26377	1.66253	1.53444e-49	Down
DNAJC9	3.70873	5.36943	1.6607	5.5895e-125	Up
ADIPOQ	1.15371	2.81222	1.65851	7.0506e-122	Up
DPM2	5.53087	3.87558	1.65529	1.84808e-47	Down
PTGS1	5.61592	3.96164	1.65427	7.5362e-121	Down
NFIX	4.81163	3.15776	1.65387	1.19874e-69	Down
PCDHGB6	3.27967	1.62629	1.65339	1.62141e-99	Down
CDH9	3.25749	1.60655	1.65094	1.83097e-100	Down
ADIPOR1	8.87431	7.22366	1.65066	4.845e-117	Down
WASF3	3.30251	1.65423	1.64828	1.5918e-94	Down
ITGB7	5.47006	7.1179	1.64784	4.5859e-114	Up
POM121	1.49112	3.13597	1.64485	1.19838e-100	Up
WDR61	3.64109	5.28554	1.64444	3.8818e-122	Up
OSBPL11	5.26025	3.61631	1.64394	2.6088e-122	Down
GLRX5	9.23644	7.59395	1.64248	3.1981e-115	Down
BTNL3	3.66809	2.02652	1.64157	1.17136e-46	Down
ACSL1	8.0641	6.4257	1.6384	3.1706e-121	Down
COPS5	4.2554	5.89373	1.63833	1.3758e-115	Up
GMFG	5.86399	7.50137	1.63738	2.7661e-113	Up
MYOM2	5.31994	3.68293	1.63701	2.21646e-05	Down
ASCC1	3.55102	5.18763	1.63661	3.4179e-124	Up
HBE1	5.27272	6.90799	1.63527	5.44918e-92	Up
OTX1	3.25685	1.62441	1.63245	3.8411e-101	Down
ACSL4	5.08619	3.45544	1.63075	7.5381e-123	Down
CD226	4.73852	3.10831	1.63022	1.05259e-88	Down
KRT1	6.39003	4.76096	1.62908	5.11801e-27	Down
DNA2	4.15516	2.52641	1.62876	4.23962e-69	Down
GIGYF1	1.89901	3.52715	1.62814	4.3414e-123	Up
LSM7	3.85771	5.48464	1.62693	3.2016e-116	Up
TSC22D1	4.91628	3.29029	1.626	7.5378e-123	Down
BEX5	1.39076	3.01607	1.62531	6.5603e-118	Up
MRPL21	3.00765	4.63185	1.6242	8.8155e-108	Up
CTSS	7.65136	6.03017	1.6212	4.3546e-126	Down
IQGAP1	7.44527	5.82615	1.61912	1.102e-120	Down
VDAC3	5.84925	7.46786	1.61861	1.6099e-124	Up
LRRC25	6.56536	4.94729	1.61807	2.7271e-123	Down
GPR162	5.48255	3.8647	1.61785	1.87769e-81	Down
MT1F	4.46159	6.07875	1.61716	1.3665e-115	Up
PHKA2	4.4724	6.08937	1.61697	2.725e-124	Up
KIR3DL1	4.73272	3.11698	1.61573	2.6095e-17	Down
CETN2	4.58147	6.19615	1.61468	4.4356e-115	Up
SPC24	2.16366	3.77735	1.61369	6.6082e-110	Up
HIPK2	2.91222	4.52216	1.60995	2.1928e-108	Up
DPY30	2.94624	4.55275	1.60652	8.6224e-106	Up
PCMT1	5.15584	6.76183	1.60599	3.6765e-116	Up
IGFBP7	4.78613	3.18024	1.60589	2.21594e-94	Down
VWCE	6.1448	4.53921	1.60559	1.34381e-56	Down
STAR	1.31162	2.91703	1.60542	1.6111e-114	Up
PTPRN	2.78765	1.1826	1.60506	6.5549e-102	Down
RPS9	6.8588	8.46237	1.60358	4.7978e-118	Up
MCOLN1	6.71131	5.10833	1.60297	1.8478e-117	Down
EPHB1	4.61039	3.00975	1.60065	3.5406e-108	Down
TMEM145	3.17262	1.57522	1.59741	6.15846e-100	Down
DR1	5.49135	3.89579	1.59556	2.445e-121	Down
CCR7	5.91314	7.5075	1.59436	1.4009e-102	Up
DRD4	3.20771	1.61597	1.59175	2.19493e-99	Down
LZTFL1	3.91325	2.32241	1.59083	1.8436e-114	Down
VCPIP1	5.6858	4.09753	1.58827	6.3215e-119	Down
KIAA1875	3.18906	1.60541	1.58365	5.4428e-101	Down
GZMK	4.69884	6.28194	1.58309	2.931e-97	Up
TMEM156	2.5899	4.17207	1.58217	1.61547e-59	Up
SLC4A1	6.66829	5.08801	1.58028	3.6367e-66	Down
ADAM23	1.37323	2.95053	1.57729	1.5337e-114	Up
EXOSC1	3.67245	5.24842	1.57597	1.3352e-122	Up
RNF123	5.56937	3.9942	1.57517	1.0351e-120	Down
ZNF827	2.95144	4.52526	1.57382	5.0113e-115	Up
SLC25A39	10.7888	9.21931	1.56948	6.8875e-125	Down
FKBP11	4.87041	6.43872	1.56831	1.4887e-119	Up
CD248	4.10664	2.5384	1.56824	1.87546e-38	Down
C17orf74	3.15825	1.59005	1.5682	2.64766e-100	Down
CHPF	1.31146	2.87961	1.56815	2.4145e-113	Up
APOOL	1.83254	3.39945	1.56691	2.8897e-125	Up
PIAS4	4.79712	6.36128	1.56416	1.9471e-124	Up
GALNT3	3.78432	5.34833	1.56401	6.5536e-101	Up
ZCCHC17	3.21572	4.77957	1.56386	3.2941e-113	Up
DISC1	1.43797	3.00029	1.56232	4.9237e-121	Up
TMEM165	4.38262	2.82258	1.56004	1.1005e-110	Down
ZNF185	6.38869	4.83039	1.55829	3.0541e-123	Down
NGDN	2.92008	4.47747	1.55739	1.0595e-121	Up
ATXN3	3.0286	4.58432	1.55572	5.1881e-119	Up
LOC400958	3.12614	1.5705	1.55564	4.1025e-103	Down
GUCA2A	3.11662	1.56129	1.55533	4.0416e-102	Down
CPD	6.75433	5.1994	1.55493	8.2276e-119	Down
DMRTB1	3.12637	1.57463	1.55174	4.05696e-99	Down
MRPL23	4.32733	5.8778	1.55047	3.4943e-120	Up
NRIP1	5.35303	3.80518	1.54785	1.7045e-123	Down
TMEM107	1.72029	3.26768	1.54739	6.7375e-110	Up
COX6A1	4.33217	5.87844	1.54627	8.9818e-116	Up
HAGH	7.91129	6.36686	1.54443	5.0939e-114	Down
TSTA3	5.03454	3.49343	1.54112	9.44272e-75	Down
BATF	2.99947	4.53826	1.53879	9.5467e-109	Up
CCL8	3.03461	1.49738	1.53724	2.59752e-78	Down
HIST1H2BE	4.56818	3.03137	1.53681	4.1828e-122	Down
HOXC10	2.58139	1.04495	1.53645	5.84452e-48	Down
RASSF2	8.1193	6.58546	1.53384	3.8058e-126	Down
AFF4	5.0173	3.48412	1.53317	3.8949e-117	Down
POLE4	4.61735	6.14761	1.53026	8.8049e-111	Up
TLR7	5.0928	3.56293	1.52987	6.0566e-107	Down
CCNG2	5.17255	3.64306	1.52949	4.4697e-118	Down
CDK10	2.71649	4.24471	1.52822	1.7637e-116	Up
MTPN	8.38217	6.85414	1.52802	1.3096e-124	Down
TRIM58	6.39741	4.86952	1.52789	1.6706e-76	Down
MBNL2	4.46565	2.93794	1.52771	1.1605e-108	Down
PPM1D	5.28941	3.76187	1.52754	1.8448e-124	Down
PNPLA8	4.344	2.81692	1.52708	1.03546e-90	Down
MYL6	7.65478	9.17929	1.52451	1.2265e-107	Up
CHD8	4.73616	6.25828	1.52212	6.3827e-119	Up
ISCA1	4.80827	3.28661	1.52166	8.3826e-116	Down
CCR4	1.39456	2.91347	1.51891	1.2188e-113	Up
ZNF486	8.48506	10.0035	1.51842	1.4601e-112	Up
ZNF160	3.21099	4.72898	1.51799	3.4176e-114	Up
KIR2DL1	4.64288	3.12538	1.5175	3.0046e-16	Down
UFC1	4.63382	6.15051	1.51669	3.7596e-119	Up
MCHR2	3.06064	1.54428	1.51636	2.5556e-101	Down
COPS4	3.11224	4.62825	1.51601	2.5198e-113	Up
IAH1	3.47217	4.98645	1.51429	4.7387e-117	Up
RIOK3	6.47942	4.9666	1.51281	1.4172e-123	Down
ABHD5	6.45847	4.94575	1.51272	1.4834e-118	Down
FOSB	2.52536	4.03786	1.5125	1.2832e-105	Up
PVRL2	2.82156	1.31075	1.51081	6.52343e-70	Down
CYP27A1	6.61807	5.10754	1.51053	9.2161e-108	Down
RB1CC1	5.78854	4.27934	1.50919	5.3877e-115	Down
DEFB123	3.04219	1.53327	1.50893	2.7967e-106	Down
BAX	3.04576	4.55445	1.5087	1.3173e-116	Up
UBQLN3	3.11355	1.605	1.50855	1.92649e-98	Down
TAF1B	2.19377	3.70045	1.50668	1.164e-109	Up
CAPN11	3.00338	1.49733	1.50605	4.5451e-110	Down
CA5B	3.57585	5.0818	1.50595	8.2287e-114	Up
MFAP4	3.08224	1.57693	1.50531	1.1939e-100	Down
CD3E	4.59373	6.09879	1.50506	4.0091e-108	Up
C6orf48	4.47867	5.98367	1.505	1.0386e-123	Up
UBE3B	4.31874	2.81398	1.50476	6.9197e-115	Down
EEF1D	3.68921	5.19363	1.50443	1.1787e-123	Up
RNF10	6.92243	5.41904	1.50339	3.8745e-115	Down
CHST3	3.05382	1.55091	1.5029	1.15773e-100	Down
GSTT1	1.90827	3.40973	1.50146	7.62881e-43	Up
WFIKKN1	2.61978	1.11894	1.50084	1.4061e-120	Down
C1orf56	2.73578	4.23424	1.49847	2.2386e-110	Up
STAC2	3.0484	1.55079	1.49761	5.833e-103	Down
EDARADD	3.05989	1.56304	1.49685	8.19028e-100	Down
JSRP1	1.38486	2.88152	1.49666	6.3221e-121	Up
CMTM8	5.27402	3.78113	1.49289	1.59826e-65	Down
ASPRV1	5.35148	3.85889	1.49259	1.0733e-112	Down
TMEM126A	3.03856	4.52913	1.49057	2.36711e-89	Up
TRIB1	6.71075	5.2209	1.48985	1.2669e-122	Down
USP49	6.39065	7.88021	1.48955	3.7512e-109	Up
DDX50	2.80085	4.28921	1.48836	4.1206e-114	Up
TBC1D9	5.35263	3.86894	1.48369	1.6141e-123	Down
STAG2	5.26916	3.78548	1.48368	2.4043e-122	Down
APIP	2.19912	3.6821	1.48298	7.6739e-118	Up
ADRA1B	2.99644	1.51463	1.48181	3.5043e-102	Down
C3orf58	4.65906	3.17731	1.48175	1.4615e-121	Down
INS	3.01315	1.53187	1.48128	3.39561e-100	Down
GPR15	1.06685	2.54805	1.4812	1.4387e-122	Up
PICALM	7.15532	5.67452	1.4808	1.5701e-123	Down
NOL9	2.05672	3.53714	1.48042	2.5363e-113	Up
IGBP1	3.92101	5.40042	1.47941	1.0977e-116	Up
PVALB	3.30082	1.82163	1.4792	3.60242e-29	Down
UTY	2.98121	1.50283	1.47838	1.3164e-35	Down
GPC5	1.25929	2.73753	1.47825	4.6249e-113	Up
MLLT6	4.90924	6.38646	1.47722	2.028e-117	Up
LZIC	2.22153	3.6981	1.47657	7.2723e-122	Up
BANF2	2.98234	1.50628	1.47606	4.1339e-109	Down
FLJ20712	3.00332	1.53009	1.47324	8.9067e-103	Down
RGS18	7.00723	5.53774	1.46949	4.1588e-104	Down
PTCH1	1.7571	3.22633	1.46923	1.0564e-115	Up
MST4	6.2691	4.80064	1.46845	2.0624e-123	Down
CALB2	2.99159	1.52375	1.46784	3.9274e-103	Down
GAA	5.2982	3.83071	1.4675	5.7624e-105	Down
GFI1B	4.16178	2.69437	1.46741	3.1277e-117	Down
PCDHA5	3.02231	1.55502	1.46729	5.0366e-102	Down
NDUFA8	4.62587	6.09283	1.46696	1.4792e-119	Up
SPRR1B	3.03502	1.56839	1.46664	1.06704e-98	Down
HYLS1	2.63857	4.10467	1.46611	2.5386e-120	Up
SPIN4	4.19594	2.7315	1.46444	8.3008e-106	Down
DDX43	1.04668	2.50912	1.46244	3.5772e-114	Up
SCNN1B	2.99171	1.5329	1.45881	3.86548e-98	Down
MRPL39	2.21599	3.67478	1.45878	4.2522e-104	Up
SCRT1	2.9624	1.50368	1.45873	1.7774e-109	Down
SH3BGRL2	5.38013	3.92151	1.45862	8.87621e-60	Down
RAB12	2.83488	4.29215	1.45727	6.1455e-123	Up
TNIP1	7.18007	5.7231	1.45697	1.6819e-124	Down
MRPL2	2.43539	3.8918	1.45641	2.83528e-97	Up
ADAMTS4	3.02184	1.56564	1.4562	2.9001e-102	Down
FRAT1	5.92374	4.46772	1.45602	6.1434e-123	Down
DCTN4	5.10811	3.65211	1.456	4.3417e-122	Down
OR11A1	2.99206	1.53648	1.45558	5.4237e-104	Down
LOC648691	2.99954	1.54427	1.45527	6.23453e-100	Down
TGM2	4.14138	2.68682	1.45457	2.65825e-64	Down
JAZF1	5.97455	4.52023	1.45432	2.0776e-123	Down
CYP26A1	2.96836	1.51412	1.45424	3.8309e-107	Down
NCF2	7.52741	6.07436	1.45306	1.2628e-114	Down
MRFAP1L1	3.74192	5.19469	1.45276	1.4323e-123	Up
IGSF9B	1.82534	3.27668	1.45134	5.7382e-114	Up
KRT83	2.98392	1.53367	1.45025	4.5045e-103	Down
HAPLN2	2.94458	1.4947	1.44987	4.794e-103	Down
ZDHHC18	7.43751	5.98886	1.44866	5.2613e-122	Down
RNF152	2.92001	1.47156	1.44846	3.6003e-112	Down
SOD2	8.30296	6.85597	1.44699	1.6936e-121	Down
TNPO3	4.42659	5.87343	1.44685	2.8083e-121	Up
BRSK1	3.58821	5.03505	1.44684	7.3269e-107	Up
MMP3	2.95547	1.50899	1.44648	2.9639e-102	Down
SLC30A7	5.29613	6.74259	1.44647	3.8239e-123	Up
TLE3	5.67942	4.23436	1.44506	1.4257e-118	Down
RAB11FIP2	4.96704	3.52255	1.44449	1.1767e-120	Down
PROS1	4.3718	2.92757	1.44423	2.22694e-09	Down
ASF1B	4.79281	3.35077	1.44204	7.2724e-99	Down
UBE2H	5.92344	4.48225	1.44118	1.6597e-122	Down
ZNF682	4.752	6.19251	1.44051	2.8388e-105	Up
SLC10A2	3.01147	1.57235	1.43912	1.0016e-101	Down
ALKBH8	2.54249	3.98017	1.43768	6.25831e-83	Up
LOC150051	2.95245	1.51538	1.43707	1.7897e-103	Down
TACC3	6.09954	4.66251	1.43703	1.4029e-121	Down
TNMD	2.91821	1.48134	1.43687	3.5325e-103	Down
PDYN	2.93431	1.49759	1.43672	8.9693e-107	Down
RPL31	3.46123	4.89718	1.43595	1.59308e-12	Up
RARS2	3.94299	5.37883	1.43584	6.9649e-118	Up
WSB2	5.16601	3.73064	1.43537	4.7305e-118	Down
MYOZ1	2.94707	1.5128	1.43427	1.011e-101	Down
DAGLA	2.96093	1.52673	1.4342	3.4888e-103	Down
C14orf142	1.84147	3.2754	1.43393	2.8655e-104	Up
COL17A1	1.17459	2.60815	1.43356	2.4286e-117	Up
KCNK13	2.97302	1.54049	1.43253	8.13514e-99	Down
AZI2	4.71982	3.28933	1.43049	1.16546e-85	Down
BUB1	1.11431	2.54342	1.42911	2.8048e-115	Up
SLK	5.13322	3.70474	1.42847	2.4532e-111	Down
NUDT2	2.7966	4.22487	1.42827	8.3278e-116	Up
MBNL1	6.35309	4.92492	1.42817	1.9289e-121	Down
TAAR8	2.94812	1.52069	1.42743	1.30537e-100	Down
HOXD11	2.905	1.47877	1.42623	3.79253e-100	Down
SH2D1B	4.83193	3.40691	1.42502	2.01074e-68	Down
RECQL	2.99933	4.42295	1.42362	4.4511e-115	Up
LIPF	2.93932	1.51749	1.42183	1.51585e-99	Down
BPESC1	2.92589	1.50434	1.42156	1.1162e-101	Down
PPWD1	3.37571	4.7968	1.42108	4.0496e-116	Up
VN1R2	2.95855	1.53757	1.42098	1.86075e-99	Down
GNG2	6.01925	4.59882	1.42043	7.9538e-121	Down
LILRB5	1.17508	2.59546	1.42037	3.8986e-121	Up
SPOPL	4.86237	3.44299	1.41938	5.6081e-118	Down
IL1RAP	4.60774	3.18894	1.4188	8.6867e-110	Down
THEG	2.92958	1.51113	1.41845	5.6797e-107	Down
STXBP5	5.77752	4.36073	1.41679	2.7434e-119	Down
CLDN5	4.19747	2.78247	1.41499	3.27514e-48	Down
ITGB5	4.47891	3.06422	1.41468	6.34615e-98	Down
ST6GALNAC2	5.18028	3.76629	1.414	2.1788e-122	Down
PPAP2C	2.87415	1.46024	1.41391	1.2272e-110	Down
GPR97	5.23015	3.81638	1.41377	1.05398e-64	Down
KBTBD8	4.03635	2.62322	1.41313	3.42491e-53	Down
OTP	2.93396	1.52093	1.41303	4.3391e-103	Down
CCDC58	2.21101	3.62356	1.41255	2.58049e-88	Up
OPLAH	1.99042	3.40285	1.41244	1.4278e-111	Up
PDCL	2.47898	3.8913	1.41232	1.6326e-114	Up
C3orf36	2.8839	1.47299	1.41091	6.5501e-105	Down
TRPC4	2.92995	1.51906	1.41089	4.0355e-101	Down
MKRN3	1.42597	2.83554	1.40956	8.663e-116	Up
GSC	2.87313	1.46357	1.40956	1.0172e-101	Down
RPPH1	1.43137	2.84093	1.40955	2.2692e-118	Up
LGI2	2.8951	1.48725	1.40785	1.85504e-95	Down
NSMCE4A	4.25997	5.66769	1.40772	1.2633e-119	Up
COMMD1	4.37086	5.77824	1.40739	6.5195e-116	Up
PELI1	7.04913	5.64188	1.40725	3.8823e-121	Down
UBE2O	5.58583	4.17943	1.40639	1.92204e-98	Down
RNF39	2.91986	1.51396	1.4059	2.3009e-101	Down
RPL22L1	1.48537	2.89027	1.40491	4.2784e-115	Up
NFXL1	4.75466	3.35055	1.40411	3.65102e-19	Down
ECHDC2	5.22726	6.63048	1.40322	4.5972e-117	Up
RXRG	2.90354	1.50128	1.40226	6.966e-104	Down
SEC61G	5.71164	7.11339	1.40175	2.7347e-123	Up
MRPS17	2.90664	4.30798	1.40134	6.99354e-98	Up
ABCB9	1.59657	2.9976	1.40103	8.8371e-116	Up
HERC2	2.97918	4.37952	1.40033	5.2688e-121	Up
KRTAP4-7	2.89462	1.49477	1.39985	1.1044e-107	Down
TRIOBP	5.80125	4.40167	1.39958	1.8849e-125	Down
TMEM56	2.58552	1.186	1.39953	2.29179e-100	Down
AEBP1	1.97194	3.37119	1.39924	7.4586e-114	Up
PIM1	8.54312	7.14458	1.39855	3.265e-118	Down
HIST1H4H	4.37478	2.97724	1.39755	8.2441e-46	Down
KRTAP4-12	2.87458	1.48027	1.39431	4.8981e-102	Down
IQGAP2	5.41174	4.01784	1.3939	6.5633e-114	Down
A4GNT	2.85448	1.46109	1.39339	2.1595e-102	Down
KRTCAP3	1.67977	3.07278	1.39301	2.1048e-105	Up
OR51M1	2.86441	1.47145	1.39295	1.72707e-100	Down
ST8SIA5	2.55213	1.15942	1.3927	5.2461e-122	Down
GTF2F1	3.84798	5.23956	1.39157	2.535e-114	Up
HPS1	5.05996	3.66839	1.39156	2.83377e-78	Down
FBXO30	4.40183	3.01048	1.39135	7.8566e-86	Down
TM4SF1	2.7607	1.37031	1.39039	3.62664e-98	Down
EIF2B5	2.81639	4.20677	1.39038	1.0554e-113	Up
DCST1	2.88576	1.49546	1.39031	4.7051e-103	Down
PTPRN2	3.64102	2.25196	1.38905	3.87713e-74	Down
ATG2A	5.68023	4.29167	1.38855	1.1807e-116	Down
ARPC3	6.78006	8.16811	1.38805	5.1178e-110	Up
SNX2	4.62151	6.00924	1.38772	1.3611e-121	Up
CDC25B	4.99571	6.38292	1.38721	2.0497e-113	Up
GNA13	6.72784	5.34309	1.38474	8.4558e-123	Down
STX11	7.73316	6.3486	1.38457	3.796e-119	Down
ZNF573	2.57096	3.95546	1.3845	1.0553e-110	Up
LOC441179	2.8587	1.47464	1.38406	1.2868e-107	Down
PROP1	2.89958	1.51587	1.38372	8.64169e-98	Down
CALR	4.1814	5.56499	1.38359	2.1547e-117	Up
KLHL2	5.3768	3.99325	1.38355	3.9703e-107	Down
METTL7A	5.39286	4.00942	1.38344	1.04045e-87	Down
EPB41	4.68733	3.30394	1.3834	8.61497e-91	Down
PCMTD1	5.93941	4.55708	1.38233	1.6414e-111	Down
SLC25A31	2.8258	1.44532	1.38048	5.31537e-100	Down
HOXD4	2.85032	1.47058	1.37973	1.1513e-101	Down
IL25	2.8032	1.42409	1.37911	4.36536e-99	Down
MAP1LC3B	6.79802	5.41894	1.37908	1.7819e-125	Down
SOX14	2.88547	1.50653	1.37894	3.98338e-100	Down
CYP4Z2P	2.85633	1.4777	1.37864	2.2511e-110	Down
CENPB	5.3474	6.72595	1.37855	3.8139e-118	Up
PRRG2	2.87207	1.49458	1.37749	5.79176e-100	Down
SSBP1	5.01001	6.38614	1.37613	6.9631e-117	Up
PREX1	6.01618	4.6407	1.37548	7.7397e-121	Down
NOXO1	2.83629	1.46299	1.3733	3.8176e-101	Down
F11R	5.40703	4.03401	1.37302	6.8286e-115	Down
VSIG4	1.9236	3.29636	1.37276	5.5502e-115	Up
SLC6A7	2.83475	1.46283	1.37191	4.6615e-103	Down
LOC401442	2.85956	1.48799	1.37157	1.55987e-96	Down
CD46	6.84967	5.47885	1.37082	1.0443e-117	Down
ORAI2	3.96897	2.59883	1.37014	1.70699e-93	Down
ABI1	5.32089	3.95189	1.369	6.8739e-126	Down
GSPT1	9.07064	7.70183	1.36881	1.1536e-118	Down
ZNF786	5.66846	7.03717	1.36871	8.5392e-113	Up
FYN	4.95434	6.32304	1.36869	3.0656e-121	Up
SLC25A36	2.41886	3.78685	1.368	1.36631e-81	Up
P2RX1	5.64727	4.27951	1.36776	8.4047e-113	Down
MAP1LC3A	5.22221	3.8547	1.36751	2.6107e-106	Down
LPIN3	2.86694	1.49949	1.36745	5.3294e-103	Down
NUCB2	2.94705	4.31418	1.36713	2.84583e-87	Up
MPP1	7.81527	6.44869	1.36658	9.0707e-117	Down
HSDL2	5.32689	3.96296	1.36393	8.8335e-112	Down
CES3	3.79642	2.43251	1.36391	1.4195e-104	Down
FHL3	5.9781	4.61424	1.36386	1.0857e-106	Down
PLEKHH3	1.25786	2.62144	1.36358	1.6507e-117	Up
KIAA1024	3.03663	1.67342	1.36321	2.61224e-80	Down
FKBP8	5.2391	3.87622	1.36288	1.37772e-47	Down
RAMP3	2.82649	1.46384	1.36265	1.0395e-101	Down
PDCD4	5.60201	6.96452	1.36251	1.6338e-114	Up
CDKN1B	7.00345	5.64165	1.3618	5.0051e-124	Down
HIP1	4.72456	3.36277	1.36179	2.87775e-43	Down
TUFM	4.65139	6.0129	1.36151	9.2248e-121	Up
BLID	2.81389	1.45245	1.36143	1.4007e-104	Down
SF1	3.43066	4.79178	1.36112	1.67002e-88	Up
SRRD	5.2286	3.86843	1.36018	5.70159e-95	Down
KRT84	2.84943	1.48926	1.36017	7.04785e-100	Down
PCDHGA10	2.84797	1.48922	1.35875	1.1493e-102	Down
PKD2L1	0.97757	2.33481	1.35724	1.0809e-120	Up
S100A14	2.79442	1.43809	1.35633	2.08071e-97	Down
ITIH3	2.80023	1.44491	1.35533	2.17084e-97	Down
C2orf16	2.87804	1.52311	1.35493	1.23093e-99	Down
OR1F1	2.82728	1.47319	1.35409	6.1192e-101	Down
RNF215	2.8109	1.45706	1.35384	7.5107e-102	Down
BMP3	2.83818	1.48439	1.35379	3.09287e-97	Down
HCRTR2	2.83948	1.48576	1.35371	7.4704e-98	Down
MRPS21	3.901	5.25224	1.35124	2.32e-119	Up
ANKRD26	1.36758	2.71681	1.34923	1.0779e-117	Up
GPX3	3.51059	2.16139	1.3492	2.00961e-55	Down
CPLX1	1.3374	2.68623	1.34883	1.9911e-120	Up
RHBDL2	3.45527	4.80376	1.34849	3.7624e-103	Up
PLEKHN1	1.94534	3.2933	1.34797	1.3376e-119	Up
SENP7	4.90236	3.55535	1.34701	3.52091e-91	Down
ATCAY	2.80259	1.4567	1.34589	1.7703e-96	Down
SOCS6	2.72639	1.38078	1.34561	8.75596e-88	Down
PTPN12	6.12362	4.7783	1.34532	1.8441e-118	Down
CDC26	4.97164	6.31681	1.34517	4.877e-120	Up
CRYAA	2.7771	1.43245	1.34465	1.15264e-97	Down
DISP2	2.82907	1.48495	1.34412	1.98833e-97	Down
UNC13B	2.68456	1.34074	1.34382	7.3396e-109	Down
SLC25A37	9.44969	8.10603	1.34366	7.072e-122	Down
HPCAL4	3.6989	2.35578	1.34312	1.01134e-46	Down
SLC1A7	1.5088	2.85133	1.34253	9.3961e-101	Up
LRP3	3.13003	4.47235	1.34231	1.2878e-101	Up
UTP11L	3.19679	4.53874	1.34195	1.9491e-121	Up
MUC2	2.81128	1.46983	1.34145	1.23097e-99	Down
TTC14	4.3405	5.68163	1.34112	2.8508e-110	Up
NEUROG2	2.807	1.46598	1.34102	3.1454e-104	Down
ASB11	2.82855	1.48754	1.34101	6.347e-107	Down
SNRK	7.23187	5.89229	1.33958	1.4656e-122	Down
ATP13A1	3.5635	4.90297	1.33948	7.3272e-103	Up
ABCC11	2.77363	1.43426	1.33937	6.176e-101	Down
TMEM119	1.30331	2.64253	1.33922	7.8693e-103	Up
RNF133	2.78106	1.4422	1.33886	7.1633e-103	Down
TGM6	2.79772	1.45965	1.33807	3.197e-92	Down
TNFSF10	5.36575	6.70341	1.33766	4.2981e-109	Up
FNDC4	2.78205	1.44486	1.33719	9.9484e-104	Down
DBNDD1	3.9229	2.58594	1.33695	3.81673e-78	Down
SNN	5.67775	4.3409	1.33685	6.7638e-121	Down
MOS	2.78876	1.45216	1.33661	1.15176e-91	Down
LRP10	7.59621	6.2602	1.33601	6.9095e-122	Down
KIF7	2.77257	1.43675	1.33582	1.2748e-104	Down
ATP6V0C	8.91467	7.58019	1.33448	1.0321e-120	Down
PTP4A3	4.60115	3.26675	1.3344	2.3432e-100	Down
SOX21	2.82103	1.48751	1.33352	7.11319e-100	Down
OR12D2	2.80972	1.47643	1.33329	6.99318e-97	Down
SPAST	4.74346	3.4103	1.33316	6.7904e-112	Down
CKS1B	2.74402	4.07571	1.33169	3.31e-106	Up
TMEM38A	1.3	2.63152	1.33152	1.0272e-116	Up
TMEM106B	4.37594	3.04571	1.33023	2.7683e-105	Down
EIF2A	3.86194	5.19217	1.33023	1.1913e-112	Up
PCTP	4.97205	3.64201	1.33004	1.5122e-124	Down
EIF4A2	6.75928	8.08922	1.32993	3.4914e-117	Up
TFDP1	6.42505	5.09516	1.32989	1.8878e-123	Down
CHSY1	7.171	5.84115	1.32985	5.9772e-120	Down
MANSC1	5.43494	4.10577	1.32917	8.3495e-103	Down
WNT1	2.82877	1.50043	1.32834	4.72127e-96	Down
ITIH1	2.80618	1.47793	1.32825	8.43115e-93	Down
CTRB2	2.78396	1.45598	1.32798	3.7824e-101	Down
SEC24D	4.64309	3.31631	1.32677	1.2308e-112	Down
HECW1	1.02105	2.34706	1.32601	4.3327e-110	Up
TSPAN5	7.24299	5.91854	1.32445	1.2605e-108	Down
SLC26A10	2.77737	1.45335	1.32401	1.4051e-104	Down
RETNLB	2.77447	1.45069	1.32378	2.16607e-96	Down
VN1R5	2.79828	1.47478	1.3235	1.12956e-100	Down
METTL5	3.19425	4.51738	1.32313	2.4184e-107	Up
SLC22A13	2.80259	1.47947	1.32312	1.5929e-102	Down
CDH16	2.79186	1.46879	1.32307	3.2421e-96	Down
CDC5L	3.31159	4.63351	1.32192	6.6947e-103	Up
TSPAN9	5.29585	3.97402	1.32183	7.6375e-108	Down
ZDHHC8	5.45057	6.77226	1.32169	4.2711e-118	Up
NAP1L4	5.78823	7.10948	1.32124	5.1093e-123	Up
DNAJC5G	2.76054	1.43936	1.32119	1.1493e-102	Down
CDT1	1.26478	2.58594	1.32116	2.7578e-116	Up
EMR1	4.84044	3.52065	1.31979	2.02152e-65	Down
RNF14	4.87917	3.55954	1.31963	4.095e-120	Down
CHML	3.49817	2.1788	1.31938	3.90726e-58	Down
GAS2L2	2.76721	1.44796	1.31925	4.2737e-102	Down
PCYOX1	3.61884	4.93695	1.31811	2.18332e-83	Up
SPTAN1	4.34804	5.66588	1.31783	2.986e-113	Up
TAPT1	4.5402	3.22243	1.31777	1.1049e-113	Down
LOC338667	2.76272	1.44507	1.31765	4.26021e-98	Down
POR	5.20919	3.8923	1.31689	1.5592e-109	Down
CRYGB	2.74491	1.42808	1.31683	4.51304e-96	Down
ZNF213	5.51856	4.202	1.31656	5.9893e-120	Down
HLX	5.46816	4.15178	1.31637	3.95914e-82	Down
RAB6A	4.75398	3.43851	1.31547	2.7035e-111	Down
OPRD1	2.77723	1.46196	1.31527	1.25474e-97	Down
LAMP2	7.74618	6.43215	1.31403	4.8541e-126	Down
RP1L1	1.26696	2.58076	1.3138	1.9415e-112	Up
TAGLN2	8.76257	7.44906	1.3135	1.7708e-122	Down
EGFLAM	2.77733	1.46516	1.31217	7.3809e-105	Down
SPATA3	2.73853	1.42741	1.31112	2.62078e-99	Down
POLG	5.46365	4.15278	1.31086	3.6112e-119	Down
ATP12A	2.7936	1.48379	1.3098	2.03711e-92	Down
TALDO1	9.3884	8.0799	1.3085	1.8039e-125	Down
SERPINB7	2.76854	1.46008	1.30846	3.4479e-101	Down
PAX4	2.77177	1.46346	1.3083	4.7522e-101	Down
NEUROG3	2.85426	1.54661	1.30765	2.7811e-124	Down
TTTY11	2.74778	1.44079	1.30699	3.38515e-100	Down
PRPF18	2.25948	3.56637	1.30689	8.6506e-104	Up
SOAT1	4.69517	3.38835	1.30682	3.2803e-124	Down
GPIHBP1	2.74402	1.43768	1.30634	4.1103e-108	Down
AGR3	2.75113	1.44496	1.30617	1.1894e-102	Down
DUSP26	1.65621	2.9623	1.30608	1.0456e-120	Up
ST6GALNAC4	5.33428	4.02823	1.30604	4.07593e-86	Down
FAM104A	7.78744	6.48142	1.30601	5.3413e-113	Down
HTR3C	2.78196	1.4763	1.30566	9.90515e-98	Down
FCGR1A	3.10853	4.41367	1.30514	1.81081e-48	Up
NFIB	2.75377	1.44864	1.30513	2.56495e-45	Down
ATP5C1	3.68698	4.99191	1.30494	1.7898e-57	Up
GUCA2B	2.742	1.43759	1.30441	1.58832e-96	Down
MYL4	6.41084	5.10672	1.30412	2.44208e-53	Down
CYP2A7	2.78809	1.48414	1.30395	2.57211e-98	Down
LRRC32	2.75268	1.44876	1.30392	3.6299e-94	Down
DRAP1	5.53132	6.83458	1.30326	9.0501e-110	Up
C11orf44	2.73644	1.43357	1.30286	2.48749e-98	Down
PRKAR1A	7.46625	6.16349	1.30275	2.0817e-118	Down
TXNDC12	5.50036	6.80299	1.30263	2.077e-115	Up
ESPNL	2.72589	1.42357	1.30231	4.30067e-94	Down
SOX18	2.73463	1.43259	1.30204	1.19384e-99	Down
TLX3	2.74913	1.44732	1.30181	6.85254e-96	Down
SMOX	5.03783	3.73682	1.30101	5.452e-67	Down
LMO2	6.58275	5.28192	1.30084	1.915e-116	Down
FOXE3	2.73244	1.43175	1.30069	6.92473e-98	Down
LOC727944	2.73935	1.43878	1.30057	5.19782e-96	Down
VWC2	2.73894	1.43883	1.30011	7.38657e-96	Down
DHH	2.75267	1.45258	1.30009	7.07478e-90	Down
TBC1D7	4.55285	3.25278	1.30006	1.35542e-100	Down
AGRP	2.72134	1.42139	1.29995	9.35379e-95	Down
SSBP2	5.95477	4.65544	1.29934	4.7871e-125	Down
BMP2K	4.80635	3.5071	1.29925	9.0595e-123	Down
SOHLH2	2.71483	1.41594	1.29889	1.8955e-102	Down
BEX2	2.71465	4.01331	1.29866	2.02495e-73	Up
MPZL1	4.93105	3.63282	1.29823	7.89557e-98	Down
LOC441052	2.72812	1.43068	1.29745	2.11556e-100	Down
BASP1	9.99753	8.70014	1.29739	2.9279e-116	Down
RALB	8.41482	7.11746	1.29736	7.765e-123	Down
CRYBA2	2.74937	1.45225	1.29711	2.42029e-98	Down
GPRC6A	1.23922	2.53616	1.29693	9.1236e-118	Up
MFSD11	4.45608	5.75291	1.29682	2.4222e-99	Up
UTS2R	2.73656	1.4402	1.29636	7.38054e-98	Down
C9orf131	2.74789	1.45155	1.29634	2.30629e-97	Down
PGD	8.46091	7.16559	1.29532	5.3744e-118	Down
GJB4	2.72252	1.42797	1.29455	2.79205e-92	Down
NUMB	7.90595	6.61197	1.29398	3.2084e-125	Down
FURIN	5.52495	4.23167	1.29327	2.0864e-111	Down
KRT75	2.76804	1.47554	1.2925	1.49272e-93	Down
FAM43B	2.73179	1.43967	1.29212	3.75859e-99	Down
CACNA1S	2.69576	1.40381	1.29195	3.93196e-90	Down
CASP1	5.10541	6.39731	1.2919	1.3935e-116	Up
TAAR2	2.73748	1.44596	1.29152	9.33534e-96	Down
FGF17	2.73641	1.44585	1.29056	8.56322e-98	Down
RAB5A	5.85389	4.56338	1.29051	5.5987e-122	Down
KIAA1324	6.01244	4.72203	1.29041	1.24651e-33	Down
GDPD2	2.73117	1.44078	1.29038	3.35755e-91	Down
HLA-DQA1	5.40489	6.69524	1.29035	1.2573e-10	Up
UBL3	6.27133	4.98116	1.29017	3.0951e-118	Down
UCK1	1.90458	3.19449	1.28991	8.2439e-122	Up
N4BP2	5.22828	6.51812	1.28984	1.8913e-112	Up
DAPK2	5.03556	3.74635	1.28921	8.78032e-85	Down
CD2AP	3.93334	2.64433	1.28901	5.6603e-119	Down
TAS2R16	2.75229	1.46381	1.28847	3.83635e-89	Down
HIST2H2BE	6.12959	4.84164	1.28795	7.6635e-121	Down
C3orf27	2.7169	1.42913	1.28777	3.43723e-95	Down
DKK1	2.71973	1.4323	1.28742	2.14661e-96	Down
KRTAP11-1	2.70631	1.41889	1.28741	5.87653e-94	Down
NDUFB11	6.00168	7.28865	1.28697	1.3517e-118	Up
FAM71C	2.72348	1.43657	1.28691	9.74394e-93	Down
SUSD2	1.49303	2.77988	1.28685	1.9112e-114	Up
CHUK	5.25707	3.97048	1.28659	2.761e-113	Down
MICAL2	4.50761	3.22124	1.28637	4.89484e-85	Down
PLA2G4D	2.70428	1.41828	1.28599	1.97211e-99	Down
PNN	4.98788	6.2736	1.28572	5.0649e-114	Up
STX8	3.26018	4.54589	1.28571	2.3983e-111	Up
LRFN3	3.24987	4.53525	1.28538	5.3262e-108	Up
IFI27	4.07737	2.79261	1.28476	2.46868e-14	Down
SHARPIN	5.1266	3.8421	1.28451	1.31845e-75	Down
CLRN3	2.76372	1.47926	1.28446	3.1389e-91	Down
KRTAP9-8	2.72356	1.4404	1.28315	2.02028e-100	Down
TBC1D21	2.73988	1.45693	1.28295	9.68601e-92	Down
TMPRSS4	2.75886	1.47645	1.28241	1.62583e-95	Down
C10orf25	0.838483	2.12005	1.28156	2.381e-111	Up
CABP5	3.63632	2.35543	1.28089	4.2506e-110	Down
SH2B2	4.49948	3.21861	1.28087	3.2098e-111	Down
KCNA7	2.7034	1.42285	1.28055	2.06918e-86	Down
RSL1D1	4.63193	5.9124	1.28047	4.4759e-119	Up
ZIM3	2.73002	1.44965	1.28036	4.1939e-91	Down
UMOD	2.6877	1.40789	1.27981	8.84589e-89	Down
MRVI1	2.32243	3.60197	1.27954	1.7515e-62	Up
LEPREL2	2.68718	1.4078	1.27938	3.70405e-95	Down
PDE5A	3.5091	2.22995	1.27915	2.01619e-84	Down
DDX27	3.56193	4.84105	1.27912	1.1231e-113	Up
NINJ1	8.6563	7.37765	1.27865	3.3158e-122	Down
CMPK1	5.76935	4.49177	1.27759	8.709e-118	Down
HELZ	4.40364	5.68112	1.27748	7.4531e-120	Up
SMNDC1	6.16357	4.88681	1.27676	1.0426e-125	Down
DAD1	6.37292	7.64964	1.27672	4.4106e-123	Up
MITD1	4.01941	5.29573	1.27632	6.113e-121	Up
ESX1	2.68398	1.40773	1.27624	4.01283e-90	Down
IL23A	2.03624	3.31245	1.27621	2.9635e-110	Up
MBD3L2	2.71315	1.43822	1.27494	1.06779e-92	Down
FZD10	2.75922	1.48442	1.2748	5.64005e-88	Down
PILRA	7.31452	6.03979	1.27474	6.6816e-122	Down
NTSR2	2.70587	1.43307	1.2728	3.86846e-97	Down
ZNF622	4.69673	5.96948	1.27275	1.8856e-117	Up
DSCR4	2.70473	1.43209	1.27264	1.28302e-89	Down
SSTR2	4.71181	5.98381	1.27201	2.19575e-99	Up
DNTTIP1	6.60595	5.33422	1.27173	3.0573e-124	Down
NGB	1.56137	2.83221	1.27084	1.4352e-118	Up
DYNC1I2	3.68393	4.9534	1.26947	8.095e-114	Up
PNLDC1	1.12761	2.39662	1.26901	5.7895e-112	Up
TBR1	2.69042	1.42162	1.26881	1.60283e-93	Down
TGM3	4.76384	3.4951	1.26874	6.5441e-14	Down
NRCAM	2.62624	1.35909	1.26715	1.9719e-73	Down
NLRP6	1.24553	2.51195	1.26642	3.7015e-108	Up
CYP2A13	2.73644	1.47027	1.26617	2.06627e-95	Down
UGT2B4	2.6923	1.42614	1.26616	4.30163e-95	Down
CLTC	4.36993	3.10382	1.26611	2.6289e-113	Down
DHDH	1.55093	2.81689	1.26596	1.121e-115	Up
FBP2	2.69581	1.43017	1.26564	2.22072e-93	Down
THBS1	4.01269	2.74724	1.26544	2.44729e-29	Down
LAS1L	2.5418	3.80708	1.26527	2.7859e-104	Up
CMA1	2.72311	1.45839	1.26472	1.08743e-90	Down
RBP5	1.49004	2.75474	1.26471	2.994e-118	Up
SPEM1	2.68586	1.42119	1.26466	3.35036e-90	Down
FOXB1	2.69831	1.43366	1.26464	1.6468e-96	Down
TNFRSF10A	3.27873	4.54335	1.26462	4.0072e-113	Up
CBLN1	2.67706	1.4133	1.26375	1.499e-90	Down
CYBRD1	5.68747	4.4242	1.26327	4.0497e-69	Down
NEUROD6	2.72308	1.45987	1.26322	1.14697e-96	Down
SLC22A6	2.71365	1.45045	1.2632	2.26614e-96	Down
TMEM151A	2.69518	1.43417	1.26101	4.91274e-92	Down
PAPD5	4.27928	5.54022	1.26094	2.9096e-114	Up
PSG2	2.67297	1.4121	1.26087	4.02338e-97	Down
OR51I2	2.6707	1.41049	1.26021	1.44628e-87	Down
RHBDL1	1.38109	2.64117	1.26007	2.7928e-117	Up
DPYD	5.74451	4.48451	1.26	4.7458e-118	Down
FCHO1	5.37772	4.11845	1.25927	2.5102e-114	Down
LOC441601	2.67191	1.41282	1.25909	3.07115e-96	Down
BEST1	6.02353	4.76482	1.25871	1.2122e-116	Down
SLC38A5	4.38095	3.12227	1.25869	4.12894e-83	Down
MAGEC1	2.67339	1.41473	1.25866	5.42187e-99	Down
NOS2	2.67627	1.41797	1.2583	2.18153e-93	Down
C3orf20	2.67334	1.41513	1.25821	1.15366e-88	Down
PTGER4	6.57606	5.31797	1.25809	3.6612e-120	Down
FNDC3A	4.34324	3.08565	1.25759	8.1716e-106	Down
KIAA1644	2.71472	1.45777	1.25696	5.29966e-91	Down
ALLC	2.6593	1.40261	1.25669	2.34946e-96	Down
JMJD1C	6.07081	4.81413	1.25668	2.9927e-119	Down
OR10H3	2.68697	1.43117	1.2558	5.11669e-93	Down
GPR50	2.70617	1.45051	1.25566	6.1301e-88	Down
EIF3M	4.80886	6.06435	1.25549	1.3239e-119	Up
IL3	2.65081	1.39556	1.25525	8.69387e-89	Down
BTF3	6.90969	8.16491	1.25522	7.265e-119	Up
CD70	1.72453	2.97934	1.25481	3.381e-113	Up
GCA	9.20677	7.95276	1.25402	2.0779e-122	Down
MAP1S	5.75416	4.5003	1.25386	1.0249e-74	Down
PDHB	5.79391	7.04708	1.25317	5.7436e-120	Up
EVL	6.54413	7.79646	1.25233	1.5958e-110	Up
RAB1A	5.19064	3.93834	1.2523	5.3443e-126	Down
SPRED1	3.73203	2.47975	1.25227	3.12371e-52	Down
MRGPRX2	2.68343	1.43163	1.2518	1.23824e-94	Down
TCF21	2.66057	1.40891	1.25166	1.38363e-88	Down
ASXL2	5.34851	6.60005	1.25155	4.557e-120	Up
ELOVL5	7.23824	5.98683	1.25141	2.3817e-121	Down
CAPSL	2.67483	1.4235	1.25133	6.40149e-95	Down
SEC61A1	5.92315	7.17411	1.25096	2.3481e-122	Up
TSPAN31	4.28899	5.53988	1.25089	3.3198e-122	Up
TTTY5	2.69466	1.44405	1.25062	5.67797e-97	Down
CCL25	2.65685	1.40625	1.2506	9.15795e-93	Down
OBP2B	2.6693	1.41911	1.25019	3.35104e-88	Down
CHRM2	2.66397	1.41383	1.25014	1.52727e-96	Down
MEG3	2.8122	1.56261	1.24959	2.14497e-34	Down
LRIT1	2.66634	1.41716	1.24918	1.25741e-85	Down
SPIC	2.66001	1.41106	1.24895	4.76608e-93	Down
MEX3C	5.09875	3.84987	1.24889	1.8996e-120	Down
KIAA0408	2.45121	3.69939	1.24817	5.25248e-97	Up
APEX1	5.16692	6.41489	1.24796	2.1265e-123	Up
CGREF1	2.65591	1.40797	1.24794	1.39968e-89	Down
RETSAT	2.92937	4.17706	1.24769	4.9871e-113	Up
CLC	5.58455	6.83215	1.2476	3.91826e-66	Up
FSCB	2.68721	1.43981	1.2474	6.38216e-92	Down
VAMP8	6.14433	7.39075	1.24642	6.9946e-107	Up
MFAP2	2.64391	1.39753	1.24637	8.77834e-88	Down
ELP2	3.5334	4.7795	1.2461	1.4665e-121	Up
UGT1A6	2.64721	1.40115	1.24605	1.69141e-83	Down
MTIF3	3.74732	4.99323	1.24592	3.4421e-115	Up
MEF2A	2.76529	4.01044	1.24515	3.7049e-104	Up
SH3BGRL	6.767	5.52291	1.24409	5.3797e-124	Down
GH2	2.64975	1.40572	1.24403	3.79707e-90	Down
SUGT1	2.73131	3.97519	1.24388	6.072e-121	Up
ATP6V1A	8.20774	6.96461	1.24314	1.855e-123	Down
ABCF3	2.71186	3.95419	1.24233	2.3296e-113	Up
SIAH2	5.65419	4.41357	1.24063	7.23584e-86	Down
SDAD1	5.11343	6.35307	1.23964	7.6901e-116	Up
FYB	7.87185	6.63274	1.23911	1.0389e-123	Down
TPM4	5.09136	3.85242	1.23894	3.5384e-118	Down
POLL	4.43992	3.20123	1.23869	8.32954e-69	Down
CRISP1	1.20201	2.44036	1.23835	1.267e-120	Up
ROCK1	2.21296	3.45053	1.23756	3.13873e-81	Up
CD5	4.19845	5.43525	1.2368	7.3063e-104	Up
PPRC1	3.61473	4.85127	1.23654	3.4855e-114	Up
FAM26D	2.64842	1.41302	1.2354	3.09996e-86	Down
NLGN2	1.6092	2.84406	1.23486	2.3571e-120	Up
GRINA	6.91358	5.68056	1.23302	2.685e-102	Down
TAS2R13	2.6256	1.39301	1.23259	1.01333e-87	Down
C4orf29	3.37045	4.60295	1.2325	1.7729e-121	Up
ADSL	5.25237	6.48475	1.23238	4.0109e-123	Up
COX4I1	8.02927	9.26136	1.23209	3.948e-118	Up
SLC44A4	7.07038	8.30239	1.23201	4.4795e-113	Up
PXN	5.47209	4.24041	1.23168	3.1384e-120	Down
SKAP2	6.48238	5.25077	1.23161	2.7773e-115	Down
NEDD9	5.07863	3.84771	1.23091	1.3467e-123	Down
LOC646484	2.63732	1.40651	1.23081	2.16854e-89	Down
SNX33	1.9552	3.18537	1.23018	1.0513e-116	Up
LRFN2	2.63423	1.40422	1.23001	4.14803e-89	Down
C8B	2.63428	1.40495	1.22933	8.42889e-86	Down
DSC2	4.54668	3.31754	1.22914	1.48695e-23	Down
HACL1	4.20593	5.43507	1.22914	1.0637e-117	Up
CLIC3	5.37997	4.15138	1.22859	1.20077e-22	Down
OPN4	2.62893	1.40262	1.22631	1.72926e-90	Down
ARMCX4	1.6377	2.86345	1.22575	5.1836e-117	Up
SCUBE1	2.6414	1.41595	1.22545	3.44886e-88	Down
AMHR2	2.63543	1.41013	1.2253	6.37002e-87	Down
SSTR1	2.62355	1.39853	1.22502	1.02739e-83	Down
ARHGAP21	5.22493	4.00009	1.22483	1.0113e-104	Down
RCSD1	6.69703	5.47228	1.22476	2.8359e-124	Down
SP4	5.08108	3.85772	1.22336	5.6369e-105	Down
SLC22A5	2.2825	3.50582	1.22331	1.1308e-112	Up
FAM151A	2.62885	1.40562	1.22324	3.82627e-86	Down
CHRDL2	2.61976	1.39716	1.22261	1.26412e-83	Down
PAPSS1	5.73351	4.51092	1.22259	1.9227e-112	Down
KRTAP4-4	2.6382	1.41619	1.22201	4.09199e-83	Down
OXSM	3.27548	2.05349	1.22199	4.74914e-77	Down
SLC22A12	2.63046	1.40875	1.22171	6.19721e-92	Down
DIO1	2.61381	1.39228	1.22153	3.21302e-82	Down
GMIP	6.03197	4.81046	1.22151	3.3901e-120	Down
CDC42	3.62063	4.84124	1.2206	9.8392e-115	Up
CTTN	3.98377	2.76335	1.22042	1.40087e-58	Down
C8orf17	2.66786	1.44755	1.22031	8.70773e-84	Down
SPINK1	2.62424	1.40402	1.22022	3.03822e-84	Down
SLC1A6	2.61538	1.39515	1.22022	3.35585e-83	Down
CRABP1	2.6324	1.41243	1.21997	4.80927e-85	Down
SNCB	2.61613	1.39626	1.21987	2.63578e-86	Down
TAS1R2	2.6487	1.42888	1.21983	1.84532e-87	Down
LIME1	6.3555	7.57524	1.21974	2.1008e-116	Up
PCDHGA1	2.61903	1.39961	1.21941	7.60238e-83	Down
FSTL4	1.49085	2.71001	1.21917	3.49072e-88	Up
PPP1R12A	5.04327	3.82421	1.21906	8.4868e-106	Down
JDP2	3.80304	2.58459	1.21845	4.55687e-51	Down
STK3	4.65259	3.43442	1.21818	3.5484e-106	Down
RBPJL	1.64812	2.86618	1.21806	1.6149e-111	Up
SERP1	5.28415	4.06611	1.21804	1.6457e-117	Down
CAPZA1	4.53266	3.31466	1.21799	1.09421e-29	Down
FAM76B	4.65766	3.44061	1.21705	5.60977e-57	Down
DOC2A	2.61925	1.40248	1.21677	9.75823e-89	Down
DAPK1	4.8597	3.64295	1.21675	1.27284e-94	Down
P2RY4	2.63353	1.41689	1.21664	8.60314e-85	Down
CACNB3	2.30695	3.52347	1.21652	2.157e-109	Up
OTUD1	4.81476	3.59824	1.21651	5.8445e-125	Down
ACSM2B	2.62361	1.40727	1.21634	8.84655e-87	Down
NPTN	6.82806	5.61229	1.21577	1.8733e-124	Down
TLR5	4.36555	5.58121	1.21566	1.71547e-97	Up
MMP9	6.33766	7.55264	1.21498	4.70964e-86	Up
CCDC87	2.62631	1.41139	1.21492	6.13292e-86	Down
OCIAD2	4.1	5.31295	1.21295	1.1484e-114	Up
MPPE1	4.43027	5.64274	1.21248	1.2757e-114	Up
EML1	2.61128	1.3992	1.21208	1.01917e-87	Down
KIR2DL3	4.98185	3.7698	1.21206	1.22244e-17	Down
TP53INP2	5.54971	4.33766	1.21205	7.2957e-122	Down
KIAA0513	6.57049	5.35872	1.21176	4.0571e-121	Down
COPG2	2.20371	3.4154	1.2117	1.30906e-87	Up
ATP11B	5.33771	4.12645	1.21127	1.0861e-119	Down
LBX1	2.60404	1.39457	1.20947	3.43175e-83	Down
OSBPL2	6.08558	4.87854	1.20704	9.3407e-122	Down
PDZD8	4.66657	3.46177	1.20481	5.05858e-86	Down
GUK1	9.21974	8.01563	1.20412	7.3751e-110	Down
RAP2C	5.40724	4.20401	1.20323	5.0262e-110	Down
SNAP29	5.15419	3.95116	1.20303	5.7496e-124	Down
RPS6KA3	2.82308	4.02546	1.20238	8.094e-118	Up
PTCRA	4.41918	3.21708	1.20211	1.83209e-91	Down
TDRD10	2.41286	1.21164	1.20122	3.7573e-119	Down
ZNF800	5.47492	4.27413	1.20078	2.4708e-120	Down
PTGES3	6.53666	5.33612	1.20054	3.1785e-118	Down
CHMP5	2.77661	3.97677	1.20016	8.21893e-38	Up
SLC19A1	5.36407	4.16398	1.2001	1.673e-117	Down
LOC253573	1.27091	2.47071	1.19979	1.4842e-111	Up
SMEK2	5.73118	4.53168	1.1995	5.6934e-121	Down
NCAPD3	2.32249	3.52179	1.1993	3.36972e-99	Up
STK40	7.48811	6.28896	1.19916	9.6219e-123	Down
TMEM86B	6.02068	4.8216	1.19908	1.06222e-60	Down
C5orf24	2.40722	3.60485	1.19764	4.2175e-107	Up
ACO2	5.03016	3.83258	1.19758	5.947e-115	Down
TREML4	1.78911	2.98618	1.19707	1.1766e-60	Up
FAM117A	5.08778	3.89101	1.19677	2.4452e-117	Down
NUDT13	3.59904	2.40246	1.19657	1.0663e-112	Down
LINGO1	1.22594	2.42196	1.19602	8.4272e-115	Up
PSG9	4.356	3.16043	1.19557	9.0423e-108	Down
PDLIM7	5.23747	4.04217	1.1953	5.42482e-96	Down
SCN7A	1.39267	2.58763	1.19496	4.03e-118	Up
ARV1	2.78253	3.97721	1.19467	4.1639e-109	Up
CRYAB	2.59581	1.40244	1.19337	1.50006e-81	Down
RBM38	7.94823	6.75578	1.19245	3.1391e-107	Down
HS1BP3	5.30513	4.11283	1.1923	3.0879e-121	Down
HCG4	7.17547	5.98404	1.19143	1.32424e-88	Down
SNAP23	6.09081	4.89963	1.19118	5.4107e-117	Down
ABHD10	4.47449	3.28352	1.19097	2.59047e-73	Down
NPDC1	1.64049	2.83121	1.19072	1.68456e-97	Up
TREM1	5.36909	4.1788	1.19029	9.89497e-99	Down
KCNT1	1.22184	2.41207	1.19024	7.5451e-113	Up
RASGRP2	4.93579	6.12533	1.18954	1.3699e-116	Up
KCNS3	2.58657	1.39772	1.18886	1.88697e-81	Down
ZNF669	3.63612	4.82487	1.18875	6.52688e-91	Up
SIRT1	5.17751	3.98927	1.18824	1.2586e-91	Down
VPREB3	5.31598	4.12844	1.18753	3.29621e-13	Down
FBXL3	4.44194	3.25542	1.18652	3.9854e-112	Down
CEP70	1.30221	2.48869	1.18647	7.655e-114	Up
KIAA0753	4.24631	3.06022	1.18609	1.1664e-115	Down
ATG10	3.5443	4.73004	1.18574	1.0995e-100	Up
RP9	3.3846	4.57027	1.18567	1.9106e-112	Up
TRIM61	1.52477	2.71042	1.18565	1.6687e-113	Up
HIF1A	5.23726	4.05202	1.18524	1.0007e-120	Down
MED10	4.25011	5.43477	1.18466	1.0258e-119	Up
MRPL14	3.60436	4.78863	1.18427	9.13314e-91	Up
TM9SF2	7.4782	6.29402	1.18418	2.3243e-123	Down
TCEAL3	3.21455	4.3977	1.18315	1.0863e-110	Up
PAM	6.24398	5.06102	1.18297	3.97703e-87	Down
IPO8	5.2113	4.02875	1.18255	7.63848e-100	Down
GNLY	8.12163	6.93925	1.18238	1.7982e-107	Down
MORF4L2	3.76065	4.94124	1.18059	1.5456e-101	Up
KLF2	10.4222	9.24166	1.18052	2.1244e-121	Down
MAT2B	6.9158	5.73553	1.18026	2.0043e-123	Down
WIPI1	5.41797	4.23783	1.18014	2.2182e-120	Down
DSCAM	3.99324	2.81649	1.17675	6.8927e-105	Down
MORF4L1	6.2997	5.12299	1.17671	3.5053e-120	Down
ANKRD13D	3.0583	4.235	1.1767	3.1909e-119	Up
SSX2IP	2.99399	1.81774	1.17625	2.35732e-97	Down
GATA2	2.28757	3.46293	1.17536	2.26942e-47	Up
KRTCAP2	6.43799	7.61102	1.17303	2.0849e-111	Up
PPIL3	3.20389	4.37634	1.17246	3.6305e-110	Up
CYP11A1	3.4473	2.27668	1.17062	3.9655e-121	Down
ZBTB44	4.92928	3.75919	1.1701	5.0656e-105	Down
MRPL35	2.74968	3.91975	1.17007	5.2117e-104	Up
RASA2	5.19886	4.02921	1.16964	1.3178e-112	Down
TAL1	3.59948	2.42993	1.16955	3.00144e-90	Down
CORO1C	6.12992	4.96146	1.16846	1.2332e-120	Down
SNX16	3.56216	2.39433	1.16783	2.09565e-82	Down
GTSF1	2.26093	3.42863	1.1677	1.88876e-67	Up
ARHGAP30	7.54443	6.3769	1.16753	2.3213e-124	Down
FAAH2	2.00635	3.17378	1.16743	9.801e-105	Up
TMED9	5.0826	6.24963	1.16703	4.9753e-124	Up
RPS11	8.75192	9.91836	1.16643	1.1818e-112	Up
LOC441124	3.72587	4.89195	1.16609	4.3355e-101	Up
SLC25A46	4.89063	3.72487	1.16576	2.88301e-76	Down
PPP1R3D	5.07338	3.90786	1.16553	1.8657e-116	Down
TNP1	1.35598	2.52116	1.16518	7.1332e-120	Up
RNASEH1	4.19224	5.35693	1.16469	1.4702e-120	Up
SLC22A15	4.89059	3.72613	1.16446	2.46403e-77	Down
ZFY	2.55185	1.38794	1.1639	8.15353e-53	Down
SPSB2	4.47087	3.3071	1.16377	3.08265e-74	Down
CSGALNACT1	4.33803	3.17461	1.16342	2.74469e-80	Down
PGM2	4.87676	3.71442	1.16234	2.77454e-100	Down
BNIP2	6.36498	5.20272	1.16226	9.4768e-119	Down
B3GALT2	2.78423	1.62285	1.16138	3.24767e-71	Down
IL7R	7.01597	8.17686	1.1609	1.9856e-103	Up
SOSTDC1	1.56762	2.72815	1.16052	4.0435e-118	Up
ARL11	2.26071	3.42072	1.16001	2.69704e-92	Up
PSMC6	3.13038	4.28964	1.15926	1.26268e-98	Up
SLC40A1	6.0886	4.93037	1.15823	3.255e-119	Down
ERO1L	5.45107	4.2937	1.15736	4.8863e-114	Down
FOXN2	6.96313	5.80589	1.15724	3.1767e-117	Down
PINK1	5.87646	4.71937	1.15709	1.1234e-116	Down
PALLD	3.84242	2.68551	1.15692	3.20378e-57	Down
TBCC	5.27458	4.11791	1.15667	5.4494e-122	Down
MPZL2	4.10798	2.95142	1.15655	6.4414e-88	Down
TCP11L2	3.9129	2.75662	1.15629	1.034e-93	Down
COQ5	3.86954	5.02568	1.15614	9.248e-82	Up
CTDSPL	4.66747	3.51169	1.15578	5.04595e-56	Down
RPUSD1	4.93956	3.78395	1.15561	2.5961e-110	Down
BOLA3	3.5392	4.69409	1.15489	5.5667e-105	Up
PRTFDC1	2.51631	1.36216	1.15415	1.23619e-81	Down
CD6	6.14386	7.29765	1.15379	5.5891e-107	Up
SMARCD2	5.93954	4.78623	1.15331	3.3985e-119	Down
CMTM6	7.52012	6.36712	1.15299	7.2549e-119	Down
TLK1	4.70811	3.55526	1.15285	1.4598e-82	Down
MAL	5.98822	7.14095	1.15273	7.4396e-107	Up
DNM3	3.33892	2.18635	1.15257	3.68486e-29	Down
KBTBD7	4.76143	3.60913	1.1523	3.34241e-62	Down
FBXO7	7.35058	6.19914	1.15143	1.3199e-109	Down
KPNA3	4.97338	3.82236	1.15102	7.73061e-92	Down
LDOC1	4.2988	3.14786	1.15094	4.29982e-75	Down
PLEKHB1	2.98009	4.13084	1.15075	2.33708e-93	Up
CBX3	3.15326	4.30388	1.15062	5.49512e-89	Up
SV2A	1.47862	2.6285	1.14988	7.2228e-112	Up
TESC	8.16725	7.01796	1.14929	3.4363e-109	Down
RPL36	6.33466	7.4836	1.14894	4.754e-113	Up
WIPF1	5.98013	4.83162	1.14851	4.9455e-117	Down
WBP2	9.80586	8.65758	1.14828	3.547e-123	Down
ACTR3	6.78781	5.64134	1.14647	7.6565e-107	Down
RPIA	6.31669	5.17076	1.14593	1.0341e-108	Down
TYW3	2.48546	3.63025	1.14479	6.43204e-71	Up
ZNF500	3.1737	4.3182	1.14451	1.3237e-109	Up
CTNNAL1	3.58567	2.44122	1.14445	1.43629e-64	Down
SPRR1A	2.52373	1.37932	1.14442	1.31434e-80	Down
LRFN5	2.42928	1.28572	1.14356	3.2867e-60	Down
MKL1	5.73398	4.59139	1.14259	1.0592e-121	Down
SCFD1	3.87913	5.02126	1.14213	5.1976e-121	Up
IFI6	6.4511	7.59317	1.14206	2.0449e-81	Up
SULF2	6.009	4.86806	1.14093	8.9266e-108	Down
TRAF1	2.75924	3.89975	1.14052	5.4305e-117	Up
MARCO	2.22138	3.36181	1.14043	2.7917e-64	Up
CMTM2	6.02126	7.16157	1.14031	1.2832e-101	Up
MRPL17	3.61395	4.75261	1.13866	3.95043e-86	Up
DGAT2	5.44119	4.30263	1.13856	1.6851e-110	Down
RTKN2	3.17267	2.03418	1.13849	1.46181e-68	Down
HLA-DPB1	4.97751	3.83959	1.13793	1.76654e-72	Down
BLVRB	6.94885	5.81249	1.13636	5.0878e-101	Down
GP6	3.80997	2.67366	1.13632	1.79027e-75	Down
PAPD4	6.30031	5.16409	1.13622	3.9784e-113	Down
AIRE	6.99038	8.12592	1.13555	2.0152e-110	Up
TMED3	5.49151	6.62561	1.1341	2.9913e-113	Up
NHSL2	4.1323	2.99903	1.13328	2.36392e-68	Down
SPACA4	3.24399	2.11139	1.1326	4.4066e-112	Down
PCM1	4.69398	5.82625	1.13227	2.8172e-120	Up
DCLRE1C	4.31447	5.44632	1.13185	7.4697e-102	Up
PELI2	6.08722	4.95544	1.13178	2.0781e-121	Down
YBX1	8.022	6.89047	1.13154	7.6839e-115	Down
ZNF275	3.6515	4.78297	1.13147	2.4453e-117	Up
RHOF	4.27825	3.14709	1.13117	4.02989e-86	Down
A4GALT	1.1998	2.33095	1.13116	1.6614e-117	Up
FHL2	3.38105	2.25054	1.1305	4.53566e-73	Down
SPRY2	3.22132	2.09111	1.13021	6.36391e-84	Down
SNX13	4.20144	3.0713	1.13015	1.04955e-87	Down
GTPBP4	4.4495	5.57881	1.1293	1.0205e-121	Up
ARL8B	6.39034	5.26159	1.12875	1.1968e-124	Down
CORO1A	9.2057	8.07719	1.12851	1.5722e-119	Down
TMEM138	3.87716	5.00562	1.12846	4.428e-116	Up
KCTD12	6.54979	5.42137	1.12841	1.0361e-116	Down
INPP4B	2.88205	4.01031	1.12827	2.11613e-96	Up
CCL5	8.16929	9.29754	1.12825	1.4772e-106	Up
NQO2	3.45663	4.58457	1.12793	2.18454e-54	Up
DTWD2	5.67721	6.80482	1.12761	1.00405e-98	Up
CSF2RA	6.18977	7.31662	1.12685	8.3524e-111	Up
FAM73A	4.62798	5.75438	1.12641	2.4265e-90	Up
SLPI	2.69183	3.81769	1.12586	2.95145e-30	Up
IRF2BP1	2.18078	3.30586	1.12508	2.5478e-102	Up
PBX1	3.89003	2.76504	1.12499	1.31825e-52	Down
LMNB1	3.62651	4.75148	1.12498	6.91415e-92	Up
B3GNT2	2.23329	3.35764	1.12435	8.22694e-94	Up
RAB21	5.55844	4.43446	1.12398	2.9166e-117	Down
SLC31A1	5.02199	3.8993	1.12269	7.08832e-82	Down
TTC19	4.25499	5.37748	1.12249	4.988e-116	Up
GPR55	1.63477	2.757	1.12224	7.8013e-102	Up
GNL3	2.71836	3.84017	1.1218	9.71528e-94	Up
ZNF33B	3.32262	4.44429	1.12167	3.29496e-92	Up
MYBPH	4.03382	2.91225	1.12157	2.69912e-95	Down
SLC39A14	1.79626	2.91745	1.12119	6.855e-107	Up
KCNK7	3.01559	1.89575	1.11984	9.6997e-111	Down
TM6SF1	6.00488	4.88524	1.11964	1.1873e-112	Down
ORAI1	4.34715	5.4664	1.11925	1.3643e-111	Up
RNF144B	5.88873	4.76981	1.11892	1.3092e-112	Down
SPRYD4	3.59252	2.47367	1.11885	7.93391e-68	Down
AP2B1	3.23992	4.35833	1.11841	1.5114e-104	Up
METRN	1.55516	2.67353	1.11837	7.9107e-114	Up
TXNIP	9.40526	8.28699	1.11827	9.4113e-122	Down
PIK3IP1	6.27834	7.3964	1.11806	1.2021e-105	Up
CBLB	4.87553	5.99317	1.11764	1.2953e-111	Up
UBA6	4.61492	3.49738	1.11754	7.4887e-60	Down
LIMS1	5.50796	4.39052	1.11744	3.7728e-110	Down
DYNLT1	5.17492	6.29206	1.11714	3.1882e-111	Up
DAP	5.61771	4.50077	1.11694	1.0636e-117	Down
NDEL1	7.83874	6.72215	1.11658	6.0674e-122	Down
LOC441454	1.54613	2.66257	1.11644	8.8117e-109	Up
ERF	4.63568	3.5193	1.11637	2.53479e-95	Down
SLFN13	3.15206	4.26814	1.11608	4.46426e-86	Up
FAM49B	5.93594	4.82032	1.11562	1.8907e-109	Down
ELMOD2	2.14676	3.26197	1.11521	5.43339e-92	Up
CDR2L	2.83228	1.71762	1.11466	1.6155e-103	Down
SYTL4	3.04875	1.93413	1.11463	1.95862e-57	Down
NDUFA4	5.04318	6.15659	1.11341	1.12666e-43	Up
TCF25	5.62892	6.74213	1.11321	4.3536e-117	Up
TMED5	6.22397	5.11117	1.11279	5.2798e-118	Down
HLA-C	4.76338	5.87609	1.11271	6.32894e-95	Up
TCEAL4	2.97401	4.0865	1.11249	2.8244e-103	Up
PMAIP1	3.66338	2.55099	1.11239	4.78753e-56	Down
KEL	3.51265	2.40049	1.11217	4.64408e-31	Down
HIST1H2BD	5.22957	4.11836	1.11121	2.73994e-70	Down
RNF150	1.33426	2.44518	1.11091	2.67366e-100	Up
LOC388692	5.38303	4.27295	1.11009	5.9291e-121	Down
CECR7	2.47834	3.58819	1.10985	4.8343e-107	Up
DGCR2	6.24696	5.1374	1.10956	8.0357e-118	Down
B3GNTL1	4.17705	3.06813	1.10892	7.31374e-45	Down
SELPLG	5.07506	6.18347	1.10842	1.64981e-100	Up
KCNMB1	4.54144	3.43313	1.10831	6.17313e-66	Down
EXTL3	5.69629	4.58808	1.10821	1.1016e-112	Down
TNFRSF10B	6.04097	4.93313	1.10784	3.5957e-123	Down
LYRM2	3.17072	4.27797	1.10725	5.94687e-90	Up
EVI2A	4.44305	3.33596	1.10709	1.29421e-07	Down
EPX	1.31367	2.42034	1.10667	4.652e-116	Up
KIF20A	1.32297	2.42881	1.10584	1.8149e-115	Up
ZNF442	1.71361	2.81944	1.10584	1.7129e-113	Up
IFITM1	7.77162	8.87721	1.1056	2.7174e-104	Up
PPA2	6.34035	7.44584	1.10549	1.5555e-106	Up
PF4V1	4.30343	3.19822	1.10521	4.20257e-08	Down
CD300LF	6.75721	5.65215	1.10507	1.2775e-114	Down
NUP43	4.34459	5.44904	1.10446	8.4295e-119	Up
ZNHIT3	3.38977	4.49177	1.102	2.28383e-80	Up
HIGD2A	6.27233	7.37381	1.10148	7.2107e-109	Up
C17orf59	2.60851	3.70954	1.10103	2.4408e-105	Up
CEBPE	4.12391	3.02375	1.10016	6.28353e-35	Down
PSG3	4.41766	3.31786	1.0998	1.6763e-108	Down
SAP130	5.74686	4.64716	1.0997	1.1261e-122	Down
FAM46A	5.74349	6.84292	1.09943	7.5728e-121	Up
TEF	5.60728	4.50804	1.09924	4.8242e-121	Down
TTC27	3.3228	4.42164	1.09884	5.0031e-113	Up
VAV1	5.64777	4.54929	1.09847	8.021e-122	Down
MRPS10	4.89625	5.99458	1.09833	2.3874e-121	Up
VDAC1	6.99887	5.90095	1.09791	2.7036e-123	Down
UBAP1	7.00144	5.90378	1.09766	1.2624e-124	Down
ZBTB20	4.08537	5.18295	1.09757	1.2617e-116	Up
PEX26	2.19767	3.29476	1.09709	2.7521e-114	Up
HDDC2	4.68361	5.77928	1.09567	1.305e-112	Up
TM7SF3	3.66145	4.75691	1.09547	1.7383e-101	Up
ZBTB11	3.81777	2.72245	1.09533	2.75325e-71	Down
GUCY1A3	3.82172	2.72643	1.09529	3.26976e-39	Down
EPHX2	4.45033	3.35515	1.09518	1.62779e-45	Down
AQP9	9.56839	8.47431	1.09408	3.1684e-119	Down
FSTL1	2.51596	1.42206	1.0939	2.90987e-61	Down
NINJ2	7.84788	6.75444	1.09344	2.8442e-109	Down
CHRNA6	1.82317	2.91405	1.09088	2.987e-114	Up
GPT2	1.97768	3.06671	1.08903	2.0554e-109	Up
ITGA4	4.68908	3.60058	1.08849	5.559e-34	Down
KRTAP4-8	3.08832	2.00018	1.08814	1.7703e-122	Down
CAPG	4.55476	3.46871	1.08605	2.5054e-106	Down
HOXC13	2.77767	1.69227	1.0854	7.9648e-122	Down
GLB1L	1.86982	2.95502	1.0852	5.531e-104	Up
MLPH	2.88404	1.79914	1.0849	9.0269e-113	Down
LHFP	2.90725	1.82242	1.08483	3.31652e-80	Down
CDKN2AIPNL	7.31378	8.3984	1.08463	3.4601e-111	Up
CISD2	3.97987	2.89542	1.08445	8.04992e-29	Down
PRDX2	6.04306	4.95885	1.08421	1.0995e-106	Down
WNT9A	1.33827	2.4223	1.08403	5.5687e-112	Up
GBF1	3.13805	4.22167	1.08362	4.22585e-100	Up
CDC42SE1	7.1025	6.01945	1.08305	5.0025e-123	Down
SNX3	7.59273	6.5101	1.08263	8.5244e-119	Down
SLC35A5	6.40654	5.32579	1.08076	3.1564e-124	Down
MARCKS	8.25751	7.17747	1.08003	3.5855e-117	Down
MCM5	5.43091	4.35157	1.07935	1.3938e-113	Down
BARD1	3.30098	4.37977	1.07879	1.20599e-92	Up
SCYL1	6.61868	5.53995	1.07873	4.1736e-122	Down
LGALS3	6.08634	5.00774	1.0786	5.56638e-95	Down
GP1BA	4.55355	3.47507	1.07848	2.71889e-81	Down
IGF2BP3	3.54949	2.47117	1.07832	8.05742e-60	Down
TGFBR2	7.63423	6.55731	1.07692	8.4037e-124	Down
H1F0	5.17782	4.10093	1.07689	1.34664e-14	Down
TGFB1	2.06619	3.14286	1.07667	4.9674e-114	Up
DDX24	5.24947	6.32613	1.07666	1.2385e-112	Up
LGALS12	4.31197	3.23535	1.07663	1.03992e-29	Down
SDHD	6.33045	5.25401	1.07645	2.768e-115	Down
HCN1	1.28958	2.36581	1.07623	2.4572e-110	Up
VPS37B	6.52678	5.45129	1.07549	1.4199e-120	Down
PAQR3	3.76801	2.69253	1.07548	2.159e-83	Down
BCCIP	2.95677	4.03201	1.07524	3.3013e-120	Up
SLC37A1	4.24095	3.16629	1.07466	1.5136e-114	Down
LITAF	10.1662	9.09179	1.07439	1.7739e-115	Down
TST	7.35654	6.28229	1.07425	9.7003e-118	Down
PLOD2	2.54908	1.47496	1.07412	2.2538e-53	Down
SLC35E1	5.40479	6.47733	1.07254	7.022e-110	Up
ZNF304	3.56588	2.49404	1.07184	1.03568e-86	Down
SNTB2	3.88215	4.95337	1.07121	5.1799e-121	Up
DDX3X	6.78148	5.71067	1.07081	1.8387e-116	Down
BATF2	3.42059	2.34995	1.07065	9.93136e-13	Down
PPIG	2.89991	3.97035	1.07044	1.62462e-67	Up
YTHDF3	5.12718	4.05754	1.06965	6.6816e-102	Down
ZNF562	3.94337	5.01273	1.06935	5.7917e-106	Up
TRIAP1	3.11897	4.18828	1.06931	2.62e-102	Up
SLC22A18	4.78719	3.71813	1.06906	4.40357e-75	Down
FAM102B	4.45343	3.38473	1.06869	1.4437e-109	Down
CDA	7.31716	6.24864	1.06852	2.2176e-108	Down
SH2D3C	6.13291	5.06441	1.0685	9.0841e-118	Down
EMR3	6.7295	5.66107	1.06843	1.553e-116	Down
INHBE	2.3468	1.27898	1.06782	8.4953e-114	Down
CWC15	4.05908	5.12656	1.06748	1.56892e-99	Up
LONRF1	4.16069	3.09444	1.06624	5.186e-113	Down
ALK	2.71087	1.64537	1.0655	1.3879e-117	Down
CYP1B1	5.32964	4.26461	1.06502	2.47971e-28	Down
ARRDC4	4.15729	3.09228	1.06501	2.24293e-90	Down
TC2N	4.50944	3.44453	1.06491	4.34888e-47	Down
RBMS2	3.40068	2.33631	1.06437	6.7878e-87	Down
FRY	4.06157	2.9972	1.06437	9.19001e-84	Down
DUSP2	2.24579	3.30872	1.06293	4.26317e-99	Up
RASSF10	2.37532	1.31289	1.06243	6.31138e-94	Down
CD164	4.5786	3.5166	1.062	1.42993e-84	Down
ACPT	4.27392	3.21214	1.06178	4.23412e-67	Down
STARD10	4.96795	3.90637	1.06158	8.64027e-84	Down
PPFIA3	1.43386	2.49489	1.06103	8.6856e-110	Up
WBSCR22	4.29974	5.36023	1.06048	3.0563e-115	Up
WDR26	5.99512	4.9353	1.05981	1.6375e-120	Down
C1orf198	4.26568	3.20642	1.05926	9.36882e-85	Down
CD274	2.03639	3.0955	1.05911	4.562e-116	Up
FRMD3	4.19625	3.13721	1.05904	6.0016e-56	Down
BANK1	5.72034	4.6615	1.05884	3.25445e-50	Down
TFCP2L1	1.2861	2.34431	1.05821	2.8028e-105	Up
CLNS1A	4.77597	5.83414	1.05817	3.5805e-115	Up
WDR70	3.04912	4.10649	1.05737	2.4057e-109	Up
ITGB3	3.91188	2.85451	1.05737	4.79477e-20	Down
PSMC1	6.25287	7.30948	1.05661	1.2085e-120	Up
RPL19	9.07981	10.1363	1.05652	6.3491e-121	Up
MTSS1	5.77825	4.72227	1.05598	4.5055e-119	Down
ZIC3	1.02083	2.07637	1.05554	8.0355e-110	Up
HECA	6.07585	5.02036	1.05549	6.2754e-110	Down
SLC25A10	1.66616	2.72118	1.05502	7.4797e-105	Up
KRAS	4.70209	3.64787	1.05422	2.0498e-123	Down
ELL	5.91689	4.86319	1.0537	2.8207e-105	Down
TSPYL6	2.47995	1.42641	1.05354	2.85729e-93	Down
RUNX2	3.95111	2.89779	1.05332	1.9389e-75	Down
CXCL5	3.50866	2.4554	1.05326	1.18523e-50	Down
MXI1	4.49707	3.44391	1.05315	2.21677e-99	Down
SLC25A35	2.11741	3.1705	1.05309	8.5896e-109	Up
RAB38	1.78196	2.83498	1.05303	2.2444e-100	Up
TUBA8	2.63297	1.58114	1.05183	9.0706e-119	Down
HKDC1	2.19498	3.24669	1.05171	1.07573e-95	Up
NRGN	6.97866	5.92707	1.0516	4.71838e-94	Down
SIPA1L2	5.50417	4.45322	1.05095	3.14624e-48	Down
C15orf39	6.98594	5.93695	1.04899	9.734e-120	Down
MRPL15	3.36972	4.4183	1.04858	1.54683e-72	Up
ZNF169	2.28579	3.33425	1.04846	2.3373e-109	Up
RBM15B	4.38678	3.33916	1.04762	4.9149e-117	Down
TPM3	3.96311	5.01045	1.04734	5.1664e-102	Up
LPIN2	5.57473	4.52768	1.04705	7.536e-123	Down
RAP2A	5.14576	4.09888	1.04689	2.70021e-77	Down
C5AR1	7.89204	6.84576	1.04627	8.6612e-118	Down
C17orf70	5.08334	6.12794	1.0446	7.1471e-115	Up
EIF4H	6.9278	5.88335	1.04445	2.1085e-120	Down
ATP2B4	4.70854	5.75202	1.04348	1.6021e-112	Up
FAM47C	1.39006	2.4335	1.04344	2.158e-116	Up
MAFB	6.45595	5.41436	1.04159	4.9365e-113	Down
SCYL2	5.65599	4.61493	1.04106	4.5305e-114	Down
CDKN2D	6.43142	5.39273	1.03868	1.8856e-120	Down
AP2A1	4.03098	2.99277	1.03821	1.75278e-29	Down
NDUFB8	7.08041	8.11847	1.03806	5.9059e-113	Up
ZXDB	2.17844	3.21625	1.03782	2.1305e-99	Up
LHX5	3.00668	1.96976	1.03692	1.191e-112	Down
ATOH8	2.77223	1.73536	1.03687	6.183e-35	Down
DMC1	6.58147	7.61798	1.03651	2.9614e-101	Up
PLVAP	3.3132	2.27682	1.03638	3.78091e-47	Down
FKBP5	5.30407	6.33872	1.03464	3.44039e-97	Up
MBD4	6.6416	7.67603	1.03442	4.90432e-100	Up
NPEPL1	4.94922	5.98327	1.03405	1.3972e-110	Up
VTI1B	4.83782	3.80397	1.03386	2.0698e-55	Down
DBN1	4.07597	3.04245	1.03352	4.10455e-87	Down
SRGN	8.40432	9.43773	1.03341	1.1622e-102	Up
AFAP1L1	1.53711	2.57024	1.03312	1.0758e-116	Up
ALAS2	8.86642	7.83335	1.03307	1.17429e-99	Down
NUCKS1	2.7938	3.82685	1.03305	5.0661e-97	Up
POLR2K	3.32858	2.29553	1.03305	1.76962e-79	Down
HDGF	6.60461	5.57177	1.03284	1.4716e-112	Down
HIVEP1	4.50001	3.46754	1.03248	2.2918e-111	Down
USMG5	4.03096	2.99886	1.03211	8.33849e-74	Down
ABHD4	4.45135	3.41935	1.03201	9.3884e-106	Down
HPS3	4.57121	3.53932	1.03189	2.95926e-85	Down
SERPINA1	8.14473	7.11302	1.03171	3.7323e-117	Down
CRBN	4.44708	5.478	1.03092	1.0314e-99	Up
TSPYL4	2.51542	3.54626	1.03084	2.1999e-108	Up
DSCR10	1.7995	2.82978	1.03028	2.9933e-112	Up
PGBD1	1.55355	2.58347	1.02992	2.6606e-121	Up
CEBPB	9.69433	8.66447	1.02986	1.0133e-115	Down
ZFAND5	7.93299	6.90332	1.02967	2.5963e-115	Down
SACM1L	5.94253	4.91303	1.0295	2.90103e-99	Down
EVPL	2.7472	1.71846	1.02874	2.4523e-121	Down
MRAS	2.91496	1.88706	1.0279	1.97888e-58	Down
CLEC1B	4.27328	3.24558	1.0277	3.93617e-07	Down
TTLL4	4.25816	3.23112	1.02704	1.63717e-60	Down
LYST	5.25889	4.23226	1.02664	6.4273e-106	Down
SCGB3A2	1.22083	2.24735	1.02652	9.8126e-103	Up
SOX7	2.54458	1.51811	1.02648	1.54772e-38	Down
GPR160	4.4376	3.41192	1.02568	7.97754e-30	Down
CD160	3.26292	4.2884	1.02547	5.1507e-56	Up
BAGE	2.97417	1.94901	1.02516	2.41141e-74	Down
CDK5RAP2	3.43806	4.46306	1.025	4.2855e-109	Up
EIF2AK4	4.88537	5.90974	1.02437	6.3e-102	Up
TCTN1	4.44958	3.42548	1.0241	6.48529e-77	Down
CABP4	1.44194	2.46584	1.02391	1.8147e-110	Up
RBM14	5.54356	6.56717	1.02361	2.0762e-117	Up
MXD1	8.67554	7.65197	1.02357	3.1397e-118	Down
TIMM23	3.85004	4.87305	1.02301	3.7091e-114	Up
UBAP2	2.87179	3.89339	1.0216	7.9925e-111	Up
ABHD13	2.99656	1.97523	1.02133	1.8782e-71	Down
EIF4B	6.97898	8.00003	1.02105	1.5494e-109	Up
GHDC	3.49765	4.51866	1.02101	2.49463e-87	Up
ROBO3	2.40678	3.42746	1.02068	1.69616e-89	Up
TRIML2	2.68191	1.66179	1.02012	1.0001e-120	Down
ARF1	6.4129	5.39287	1.02004	1.0229e-120	Down
VPS29	5.2933	6.3132	1.0199	8.354e-110	Up
DDX51	6.55064	7.57004	1.0194	1.7882e-113	Up
PCID2	5.33366	6.35257	1.01892	1.2866e-116	Up
LENG1	3.43715	2.41828	1.01887	1.54841e-98	Down
LRG1	7.12052	6.10229	1.01823	5.8393e-106	Down
BCL2L2	3.85765	2.8406	1.01705	5.09654e-97	Down
CDKN2C	1.59674	2.61289	1.01615	3.1905e-117	Up
UPF1	5.57969	4.56373	1.01596	9.892e-113	Down
POLR1E	3.31424	4.32972	1.01548	1.5052e-110	Up
COMTD1	2.88932	3.90471	1.01539	1.81313e-90	Up
NPL	7.02396	6.00858	1.01538	7.9007e-114	Down
RNF138	4.33714	3.32198	1.01516	4.06013e-51	Down
ARHGAP19	5.76688	4.75188	1.01501	1.2047e-120	Down
GLRA1	1.3717	2.38656	1.01486	8.8522e-113	Up
OLAH	1.72588	2.74009	1.01421	1.0809e-107	Up
PIK3CA	3.98531	2.97198	1.01333	7.1503e-72	Down
SLC25A1	5.13966	4.12642	1.01324	7.01608e-92	Down
TMEM143	1.95702	2.96963	1.01261	1.22905e-86	Up
FAM129C	4.51743	3.50529	1.01214	1.28643e-31	Down
KLF4	4.72869	3.71712	1.01157	1.71166e-78	Down
ATP5G1	4.46803	5.47889	1.01086	2.1299e-116	Up
HIVEP2	4.6765	3.66614	1.01037	1.1743e-118	Down
HOMEZ	2.48152	1.47119	1.01034	1.77352e-91	Down
TOR1AIP1	7.04053	6.03033	1.01019	5.1502e-125	Down
ARHGEF12	2.89431	1.88416	1.01015	7.75957e-35	Down
SMCP	1.5613	2.57132	1.01002	5.9995e-109	Up
ZNF366	1.52956	2.53852	1.00895	1.0057e-111	Up
MEGF10	3.53972	2.53083	1.00889	4.58777e-88	Down
PSPN	1.22602	2.23382	1.0078	4.3054e-110	Up
ESD	4.66037	5.66793	1.00757	6.7809e-118	Up
OGFRL1	4.88368	3.87615	1.00752	3.76244e-80	Down
RPRM	2.30761	1.30047	1.00715	6.2122e-110	Down
ST8SIA4	4.94385	3.93671	1.00714	1.40901e-95	Down
GNG3	2.50137	1.49453	1.00684	2.0081e-78	Down
PRMT6	4.33704	3.33097	1.00607	1.3478e-102	Down
LOC644135	2.17778	1.17176	1.00602	1.9097e-110	Down
RANBP10	5.43105	4.42528	1.00577	2.66534e-94	Down
A1BG	1.61236	2.61806	1.0057	1.1858e-115	Up
EPOR	4.31728	3.31304	1.00423	9.55439e-56	Down
GSN	4.23012	3.22631	1.00381	5.47297e-75	Down
LMNB2	3.34897	4.35264	1.00367	1.1588e-110	Up
CCDC84	4.607	5.60984	1.00284	4.0856e-113	Up
RAB3IL1	5.03065	4.02934	1.00131	4.12435e-72	Down
RAB10	7.49414	6.49374	1.0004	1.7256e-118	Down
