# Supplementary material for: Identification of Key Ferroptosis-Related Genes in the Peripheral Blood of Patients with Relapsing-Remitting Multiple Sclerosis and Its Diagnostic Value
Source: Int J Mol Sci. 2023 Mar 29;24(7):6399. doi: 10.3390/ijms24076399 (PMC10094542; doi:10.3390/ijms24076399)
Supplement: Supplementary file 1 [file ijms-24-06399-s001.zip › Supplementary File 2.xlsx]

## Sheet: Sheet1
Supplementary File 2. The 25 differentially expressed ferroptosis-related genes.
Gene	conMean	treatMean	logFC	pvalue	Type
PRDX1	0.523688	6.75268	6.22899	1.63491e-124	Up
CISD1	3.07236	5.56347	2.4911	2.25404e-122	Up
PTGS2	6.24393	4.193	2.05093	7.49623e-119	Down
NCOA4	10.5106	8.59198	1.91862	5.34858e-127	Down
ACSL4	5.08619	3.45544	1.63075	7.53812e-123	Down
DRD4	3.20771	1.61597	1.59175	2.19576e-99	Down
NCF2	7.52741	6.07436	1.45306	1.27953e-114	Down
MAP1LC3A	5.22221	3.8547	1.36751	2.63556e-106	Down
LAMP2	7.74618	6.43215	1.31403	4.83806e-126	Down
PGD	8.46091	7.16559	1.29532	5.50689e-118	Down
NGB	1.56137	2.83221	1.27084	1.43034e-118	Up
NOS2	2.67627	1.41797	1.2583	2.1887e-93	Down
JDP2	3.80304	2.58459	1.21845	4.67748e-51	Down
CHMP5	2.77661	3.97677	1.20016	8.20356e-38	Up
SIRT1	5.17751	3.98927	1.18824	1.22936e-91	Down
HIF1A	5.23726	4.05202	1.18524	1.00068e-120	Down
WIPI1	5.41797	4.23783	1.18014	2.22564e-120	Down
SLC40A1	6.0886	4.93037	1.15823	3.25496e-119	Down
TXNIP	9.40526	8.28699	1.11827	9.08189e-122	Down
GPT2	1.97768	3.06671	1.08903	2.04877e-109	Up
CAPG	4.55476	3.46871	1.08605	2.52928e-106	Down
CISD2	3.97987	2.89542	1.08445	8.02386e-29	Down
KRAS	4.70209	3.64787	1.05422	2.04978e-123	Down
EIF2AK4	4.88537	5.90974	1.02437	6.39752e-102	Up
PIK3CA	3.98531	2.97198	1.01333	7.22481e-72	Down
