# Supplementary material for: Identification of Key Ferroptosis-Related Genes in the Peripheral Blood of Patients with Relapsing-Remitting Multiple Sclerosis and Its Diagnostic Value
Source: Int J Mol Sci. 2023 Mar 29;24(7):6399. doi: 10.3390/ijms24076399 (PMC10094542; doi:10.3390/ijms24076399)
Supplement: Supplementary file 1 [file ijms-24-06399-s001.zip › Supplementary File 3.xlsx]

## Sheet: GO
Supplementary File 3. GO enrichment analysis results for 25 differentially expressed ferroptosis-related genes.
ONTOLOGY	ID	Description	GeneRatio	BgRatio	pvalue	p.adjust	qvalue	geneID	Count
BP	GO:0062197	cellular response to chemical stress	46/172	332/18800	2.25418e-41	8.30666e-38	4.66497e-38	ABCC1/ARNTL/ATF4/ATG5/ATG7/ATM/BECN1/BNIP3/CAV1/DDIT3/EPAS1/FANCD2/FBXW7/GCH1/HIF1A/HMOX1/HSF1/HSPB1/IL6/JUN/KEAP1/LONP1/MAP1LC3A/MAP3K5/MAPK1/MAPK3/MAPK8/MAPK9/NFE2L2/NOX1/NQO1/OXSR1/PIK3CA/PML/PRDX1/PRKAA1/PTGS2/RELA/RIPK1/SESN2/SIRT1/SLC2A1/SRC/TLR4/TNFAIP3/TP53	46
BP	GO:0006979	response to oxidative stress	45/172	433/18800	8.72432e-35	1.60746e-31	9.02738e-32	ABCC1/ARNTL/ATF4/BECN1/BNIP3/DUOX1/EPAS1/FANCD2/FBXW7/GCH1/GCLC/GPX4/HIF1A/HMOX1/HSF1/HSPB1/IL6/JUN/KEAP1/LONP1/MAP1LC3A/MAP3K5/MAPK1/MAPK3/MAPK8/MAPK9/NFE2L2/NOX1/NQO1/OXSR1/PML/PRDX1/PRDX6/PRKAA1/PTGS2/RELA/RIPK1/SESN2/SIRT1/SP1/SRC/TLR4/TNFAIP3/TP53/TXNIP	45
BP	GO:0034599	cellular response to oxidative stress	37/172	284/18800	3.81426e-32	4.68518e-29	2.63117e-29	ABCC1/ARNTL/ATF4/BECN1/BNIP3/EPAS1/FANCD2/FBXW7/GCH1/HIF1A/HMOX1/HSF1/HSPB1/IL6/JUN/KEAP1/LONP1/MAP1LC3A/MAP3K5/MAPK1/MAPK3/MAPK8/MAPK9/NFE2L2/NOX1/NQO1/PML/PRDX1/PRKAA1/RELA/RIPK1/SESN2/SIRT1/SRC/TLR4/TNFAIP3/TP53	37
BP	GO:0031667	response to nutrient levels	40/172	446/18800	2.4252e-28	1.85529e-25	1.04192e-25	ALB/ASNS/ATF3/ATF4/ATG5/ATG7/BECN1/BNIP3/CDKN1A/CYBB/DDIT3/EIF2AK4/GABARAPL1/GABARAPL2/GCLC/GDF15/HMOX1/HSF1/HSPA5/LAMP2/MAP1LC3A/MAP3K5/MAPK1/MAPK14/MAPK3/MAPK8/NFE2L2/NQO1/PCK2/PRKAA1/PTGS2/SESN2/SIRT1/SLC2A1/SRC/TP53/ULK2/WIPI1/WIPI2/ZFP36	40
BP	GO:0009991	response to extracellular stimulus	41/172	479/18800	2.94271e-28	1.85529e-25	1.04192e-25	ALB/ASNS/ATF3/ATF4/ATG5/ATG7/BECN1/BNIP3/CBS/CDKN1A/CYBB/DDIT3/EIF2AK4/GABARAPL1/GABARAPL2/GCLC/GDF15/HMOX1/HSF1/HSPA5/LAMP2/MAP1LC3A/MAP3K5/MAPK1/MAPK14/MAPK3/MAPK8/NFE2L2/NQO1/PCK2/PRKAA1/PTGS2/SESN2/SIRT1/SLC2A1/SRC/TP53/ULK2/WIPI1/WIPI2/ZFP36	41
BP	GO:0042594	response to starvation	30/172	196/18800	3.02083e-28	1.85529e-25	1.04192e-25	ALB/ASNS/ATF3/ATF4/ATG5/ATG7/BECN1/CDKN1A/DDIT3/EIF2AK4/GABARAPL1/GABARAPL2/HSPA5/LAMP2/MAP1LC3A/MAP3K5/MAPK1/MAPK3/MAPK8/NFE2L2/PCK2/PRKAA1/SESN2/SIRT1/SLC2A1/TP53/ULK2/WIPI1/WIPI2/ZFP36	30
BP	GO:0009267	cellular response to starvation	26/172	160/18800	2.94021e-25	1.54781e-22	8.69242e-23	ALB/ASNS/ATF3/ATF4/ATG5/ATG7/BECN1/CDKN1A/EIF2AK4/GABARAPL1/GABARAPL2/HSPA5/LAMP2/MAP1LC3A/MAP3K5/MAPK1/MAPK3/MAPK8/NFE2L2/PRKAA1/SESN2/SIRT1/SLC2A1/TP53/WIPI1/WIPI2	26
BP	GO:0071496	cellular response to external stimulus	32/172	309/18800	1.24802e-24	5.74868e-22	3.22843e-22	ALB/ASNS/ATF3/ATF4/ATG5/ATG7/BECN1/BNIP3/CBS/CDKN1A/EIF2AK4/GABARAPL1/GABARAPL2/GCLC/HMOX1/HSPA5/LAMP2/MAP1LC3A/MAP3K5/MAPK1/MAPK3/MAPK8/NFE2L2/PRKAA1/PTGS2/SESN2/SIRT1/SLC2A1/TLR4/TP53/WIPI1/WIPI2	32
BP	GO:0031669	cellular response to nutrient levels	27/172	213/18800	3.20012e-23	1.31027e-20	7.3584e-21	ALB/ASNS/ATF3/ATF4/ATG5/ATG7/BECN1/CDKN1A/EIF2AK4/GABARAPL1/GABARAPL2/HMOX1/HSPA5/LAMP2/MAP1LC3A/MAP3K5/MAPK1/MAPK3/MAPK8/NFE2L2/PRKAA1/SESN2/SIRT1/SLC2A1/TP53/WIPI1/WIPI2	27
BP	GO:0031668	cellular response to extracellular stimulus	28/172	245/18800	8.49882e-23	3.13182e-20	1.75881e-20	ALB/ASNS/ATF3/ATF4/ATG5/ATG7/BECN1/CBS/CDKN1A/EIF2AK4/GABARAPL1/GABARAPL2/HMOX1/HSPA5/LAMP2/MAP1LC3A/MAP3K5/MAPK1/MAPK3/MAPK8/NFE2L2/PRKAA1/SESN2/SIRT1/SLC2A1/TP53/WIPI1/WIPI2	28
BP	GO:0000302	response to reactive oxygen species	25/172	203/18800	3.0629e-21	1.02607e-18	5.76236e-19	BECN1/BNIP3/GCH1/HIF1A/HMOX1/HSF1/IL6/JUN/MAP1LC3A/MAP3K5/MAPK1/MAPK3/MAPK8/MAPK9/NFE2L2/NQO1/PRDX1/PRKAA1/RELA/RIPK1/SESN2/SIRT1/SRC/TNFAIP3/TXNIP	25
BP	GO:0016236	macroautophagy	28/172	306/18800	3.77759e-20	1.09561e-17	6.1529e-18	ATG16L1/ATG3/ATG4D/ATG5/ATG7/ATP6V1G2/BECN1/BNIP3/CHMP5/CHMP6/GABARAPL1/GABARAPL2/HIF1A/HMOX1/LAMP2/MAP1LC3A/MAPK3/MAPK8/PIK3CA/SESN2/SIRT1/SNX4/SQSTM1/SRC/TP53/ULK2/WIPI1/WIPI2	28
BP	GO:0010506	regulation of autophagy	29/172	336/18800	3.86512e-20	1.09561e-17	6.1529e-18	ATG16L1/ATG5/ATG7/ATM/ATP6V1G2/BECN1/BNIP3/CISD1/CISD2/DDIT3/FBXW7/HIF1A/HMOX1/HSPB1/IFNG/KEAP1/MAPK3/MAPK8/MTDH/PIK3CA/PRKAA1/SESN2/SIRT1/SNX4/STAT3/TP53/TRIB3/ULK2/WIPI1	29
BP	GO:0070482	response to oxygen levels	28/172	324/18800	1.7584e-19	4.57205e-17	2.56763e-17	ATF4/ATG7/ATM/BACH1/BECN1/BNIP3/CA9/CAV1/CYBB/DDIT4/DPP4/EGLN2/EPAS1/HIF1A/HMOX1/HSF1/LONP1/NFE2L2/NOS2/NOX1/PML/PRKAA1/PTGS2/SIRT1/SLC2A1/SLC2A8/SRC/TP53	28
BP	GO:0097193	intrinsic apoptotic signaling pathway	27/172	295/18800	1.86108e-19	4.57205e-17	2.56763e-17	ATF4/ATM/BECN1/BID/BNIP3/CAV1/CD44/CDKN1A/DDIT3/DDIT4/FBXW7/HELLS/HIC1/HIF1A/HMOX1/HRAS/HSPB1/MAP3K5/MUC1/NFE2L2/NOX1/PML/PTGS2/SIRT1/SRC/TP53/TRIB3	27
BP	GO:0034614	cellular response to reactive oxygen species	21/172	147/18800	2.35667e-19	5.42771e-17	3.04817e-17	BECN1/BNIP3/GCH1/HSF1/IL6/JUN/MAP1LC3A/MAP3K5/MAPK1/MAPK3/MAPK8/MAPK9/NFE2L2/NQO1/PRDX1/PRKAA1/RELA/RIPK1/SIRT1/SRC/TNFAIP3	21
BP	GO:0043620	regulation of DNA-templated transcription in response to stress	15/172	53/18800	6.54823e-19	1.41943e-16	7.97141e-17	ATF3/ATF4/BACH1/DDIT3/EPAS1/HIF1A/HMOX1/HSF1/HSPA5/JUN/MUC1/NFE2L2/RELA/SESN2/TP53	15
BP	GO:0010038	response to metal ion	28/172	351/18800	1.4838e-18	3.03767e-16	1.70594e-16	ACO1/ALOX15/ATF4/ATG5/BECN1/BNIP3/CAV1/CYBB/GCLC/HIF1A/HMOX1/HSF1/HSPA5/JUN/MAP1LC3A/MAPK1/MAPK3/MAPK8/MAPK9/MT1G/NFE2L2/NQO1/PRKAA1/PTGS2/SLC40A1/TF/TFR2/TXNIP	28
BP	GO:0036293	response to decreased oxygen levels	26/172	299/18800	3.29808e-18	6.05092e-16	3.39816e-16	ATF4/ATM/BACH1/BECN1/BNIP3/CA9/CAV1/CYBB/DDIT4/DPP4/EGLN2/EPAS1/HIF1A/HMOX1/HSF1/LONP1/NFE2L2/NOS2/PML/PRKAA1/PTGS2/SIRT1/SLC2A1/SLC2A8/SRC/TP53	26
BP	GO:0000422	autophagy of mitochondrion	17/172	88/18800	3.44828e-18	6.05092e-16	3.39816e-16	ATG3/ATG4D/ATG5/ATG7/BECN1/BNIP3/CISD2/FBXW7/GABARAPL1/GABARAPL2/HIF1A/MAP1LC3A/SQSTM1/TP53/ULK2/WIPI1/WIPI2	17
BP	GO:0061726	mitochondrion disassembly	17/172	88/18800	3.44828e-18	6.05092e-16	3.39816e-16	ATG3/ATG4D/ATG5/ATG7/BECN1/BNIP3/CISD2/FBXW7/GABARAPL1/GABARAPL2/HIF1A/MAP1LC3A/SQSTM1/TP53/ULK2/WIPI1/WIPI2	17
BP	GO:0071248	cellular response to metal ion	22/172	191/18800	3.69353e-18	6.18666e-16	3.47439e-16	ALOX15/ATF4/BECN1/BNIP3/CYBB/HMOX1/HSF1/HSPA5/JUN/MAP1LC3A/MAPK1/MAPK3/MAPK8/MAPK9/MT1G/NFE2L2/NQO1/PRKAA1/PTGS2/SLC40A1/TF/TFR2	22
BP	GO:0043618	regulation of transcription from RNA polymerase II promoter in response to stress	14/172	47/18800	4.42449e-18	7.08879e-16	3.98102e-16	ATF3/ATF4/BACH1/DDIT3/EPAS1/HIF1A/HMOX1/HSF1/HSPA5/JUN/MUC1/NFE2L2/SESN2/TP53	14
BP	GO:0001666	response to hypoxia	25/172	286/18800	1.35919e-17	2.08693e-15	1.17201e-15	ATM/BACH1/BECN1/BNIP3/CA9/CAV1/CYBB/DDIT4/DPP4/EGLN2/EPAS1/HIF1A/HMOX1/HSF1/LONP1/NFE2L2/NOS2/PML/PRKAA1/PTGS2/SIRT1/SLC2A1/SLC2A8/SRC/TP53	25
BP	GO:0071241	cellular response to inorganic substance	22/172	221/18800	8.65895e-17	1.27633e-14	7.16779e-15	ALOX15/ATF4/BECN1/BNIP3/CYBB/HMOX1/HSF1/HSPA5/JUN/MAP1LC3A/MAPK1/MAPK3/MAPK8/MAPK9/MT1G/NFE2L2/NQO1/PRKAA1/PTGS2/SLC40A1/TF/TFR2	22
BP	GO:1901652	response to peptide	30/172	491/18800	1.30028e-16	1.8429e-14	1.03496e-14	ABCC1/CAV1/CDO1/CHMP5/CYBB/GCLC/GDF15/GOT1/HSF1/LPIN1/MAPK14/NFE2L2/PCK2/PIK3CA/PRKAA1/PTGS2/RB1/RELA/SESN2/SIRT1/SLC2A1/SLC2A8/SOCS1/SP1/SRC/STAT3/TLR4/TNFAIP3/TP53/TRIB3	30
BP	GO:0072593	reactive oxygen species metabolic process	22/172	231/18800	2.2271e-16	3.03958e-14	1.70701e-14	ALOX12/ATG5/BECN1/BNIP3/CDKN1A/CYBB/DDIT4/DUOX1/GCH1/GLS2/HIF1A/MAPK14/NCF2/NFE2L2/NOS2/NOX1/NQO1/PRDX1/RIPK1/SESN2/TLR4/TP53	22
BP	GO:0031331	positive regulation of cellular catabolic process	28/172	449/18800	8.94115e-16	1.17672e-13	6.60838e-14	ATG16L1/ATM/AURKA/BECN1/BNIP3/CAV1/FBXW7/GCLC/HIF1A/HMOX1/HSF1/IFNG/IL6/KEAP1/MAPK3/MAPK9/MTDH/NFE2L2/PHKG2/PRKAA1/SESN2/SIRT1/SNX4/TNFAIP3/TRIB3/ULK2/WIPI1/ZFP36	28
BP	GO:1903008	organelle disassembly	17/172	121/18800	9.59324e-16	1.219e-13	6.84585e-14	ATG3/ATG4D/ATG5/ATG7/BECN1/BNIP3/CISD2/FBXW7/GABARAPL1/GABARAPL2/HIF1A/MAP1LC3A/SQSTM1/TP53/ULK2/WIPI1/WIPI2	17
BP	GO:0036003	positive regulation of transcription from RNA polymerase II promoter in response to stress	10/172	24/18800	5.54201e-15	6.80744e-13	3.82302e-13	ATF3/ATF4/DDIT3/HIF1A/HSF1/HSPA5/MUC1/NFE2L2/SESN2/TP53	10
BP	GO:2001233	regulation of apoptotic signaling pathway	25/172	370/18800	5.74354e-15	6.8274e-13	3.83423e-13	ATF3/BECN1/BID/CAV1/CD44/DDIT3/FBXW7/GCLC/HELLS/HIF1A/HMOX1/HSPB1/MAPK9/MUC1/NFE2L2/NOX1/PML/PTGS2/RB1/RELA/RIPK1/SIRT1/SRC/TNFAIP3/TP53	25
BP	GO:0022411	cellular component disassembly	27/172	460/18800	1.35068e-14	1.55539e-12	8.73496e-13	ATG3/ATG4D/ATG5/ATG7/BECN1/BNIP3/CAPG/CHMP5/CHMP6/CISD2/DDIT4/DPP4/FBXW7/GABARAPL1/GABARAPL2/HIF1A/HSF1/IL6/LAMP2/LPIN1/MAP1LC3A/PIK3CA/SQSTM1/TP53/ULK2/WIPI1/WIPI2	27
BP	GO:0070997	neuron death	24/172	353/18800	1.83078e-14	2.04437e-12	1.14811e-12	ATF4/ATM/BID/BNIP3/DDIT3/DDIT4/EGLN2/FBXW7/GCLC/HIF1A/HMOX1/HRAS/HSF1/HSPA5/IFNG/JUN/KRAS/MAP3K5/NQO1/PIK3CA/RB1/SIRT1/TLR4/TP53	24
BP	GO:0043434	response to peptide hormone	25/172	404/18800	4.28007e-14	4.63884e-12	2.60514e-12	CAV1/CDO1/CYBB/GCLC/GDF15/GOT1/HSF1/LPIN1/MAPK14/NFE2L2/PCK2/PIK3CA/PRKAA1/PTGS2/RB1/RELA/SESN2/SIRT1/SLC2A1/SLC2A8/SOCS1/SP1/SRC/STAT3/TRIB3	25
BP	GO:0042542	response to hydrogen peroxide	16/172	128/18800	4.57187e-14	4.81353e-12	2.70325e-12	BECN1/BNIP3/HMOX1/HSF1/IL6/MAP1LC3A/MAP3K5/NFE2L2/NQO1/PRKAA1/RELA/RIPK1/SIRT1/SRC/TNFAIP3/TXNIP	16
BP	GO:0070301	cellular response to hydrogen peroxide	14/172	90/18800	8.33897e-14	8.53586e-12	4.79369e-12	BECN1/BNIP3/HSF1/IL6/MAP1LC3A/MAP3K5/NFE2L2/NQO1/PRKAA1/RELA/RIPK1/SIRT1/SRC/TNFAIP3	14
BP	GO:0071453	cellular response to oxygen levels	17/172	166/18800	2.0268e-13	2.01858e-11	1.13362e-11	ATF4/ATG7/BACH1/BNIP3/CAV1/CYBB/EGLN2/EPAS1/HIF1A/HMOX1/NFE2L2/NOX1/PRKAA1/PTGS2/SIRT1/SRC/TP53	17
BP	GO:1901653	cellular response to peptide	23/172	361/18800	2.63287e-13	2.55319e-11	1.43386e-11	ABCC1/CAV1/CHMP5/GCLC/GDF15/GOT1/HSF1/LPIN1/NFE2L2/PCK2/PIK3CA/PRKAA1/RB1/RELA/SIRT1/SLC2A8/SOCS1/SP1/SRC/STAT3/TLR4/TP53/TRIB3	23
BP	GO:0034198	cellular response to amino acid starvation	11/172	47/18800	3.56664e-13	3.37002e-11	1.89258e-11	ATF3/ATF4/BECN1/CDKN1A/EIF2AK4/MAP1LC3A/MAP3K5/MAPK1/MAPK3/MAPK8/SESN2	11
BP	GO:1990928	response to amino acid starvation	11/172	49/18800	5.87306e-13	5.41055e-11	3.03853e-11	ATF3/ATF4/BECN1/CDKN1A/EIF2AK4/MAP1LC3A/MAP3K5/MAPK1/MAPK3/MAPK8/SESN2	11
BP	GO:0055072	iron ion homeostasis	13/172	85/18800	8.30747e-13	7.46659e-11	4.19319e-11	ACO1/EPAS1/FTH1/FTL/HIF1A/HMOX1/IFNG/ISCU/NCOA4/SLC40A1/STEAP3/TF/TFR2	13
BP	GO:2001242	regulation of intrinsic apoptotic signaling pathway	16/172	171/18800	4.3247e-12	3.79441e-10	2.13092e-10	BECN1/BID/CAV1/CD44/DDIT3/FBXW7/HELLS/HIF1A/HSPB1/MUC1/NFE2L2/NOX1/PTGS2/SIRT1/SRC/TP53	16
BP	GO:0010039	response to iron ion	9/172	31/18800	6.17115e-12	5.28854e-10	2.97001e-10	ACO1/ATG5/BECN1/HIF1A/HMOX1/MAP1LC3A/SLC40A1/TF/TFR2	9
BP	GO:0051402	neuron apoptotic process	18/172	241/18800	8.66674e-12	7.25839e-10	4.07627e-10	ATF4/ATM/BID/BNIP3/DDIT3/EGLN2/FBXW7/GCLC/HIF1A/HMOX1/HRAS/HSPA5/JUN/KRAS/NQO1/PIK3CA/RB1/TP53	18
BP	GO:1901214	regulation of neuron death	20/172	313/18800	9.97772e-12	8.17064e-10	4.58858e-10	ATF4/ATM/DDIT3/DDIT4/EGLN2/FBXW7/GCLC/HIF1A/HMOX1/HRAS/HSF1/IFNG/JUN/KRAS/MAP3K5/NQO1/PIK3CA/SIRT1/TLR4/TP53	20
BP	GO:0000045	autophagosome assembly	13/172	107/18800	1.71211e-11	1.35514e-09	7.61037e-10	ATG16L1/ATG3/ATG4D/ATG5/ATG7/BECN1/GABARAPL1/GABARAPL2/MAP1LC3A/SNX4/ULK2/WIPI1/WIPI2	13
BP	GO:0071214	cellular response to abiotic stimulus	20/172	323/18800	1.76517e-11	1.35514e-09	7.61037e-10	ATF4/ATM/BNIP3/CDKN1A/EIF2AK4/GCLC/HRAS/HSF1/HSPA5/MAPK14/MAPK3/MAPK8/NOX1/OXSR1/PIK3CA/PTGS2/SIRT1/SLC2A1/TLR4/TP53	20
BP	GO:0104004	cellular response to environmental stimulus	20/172	323/18800	1.76517e-11	1.35514e-09	7.61037e-10	ATF4/ATM/BNIP3/CDKN1A/EIF2AK4/GCLC/HRAS/HSF1/HSPA5/MAPK14/MAPK3/MAPK8/NOX1/OXSR1/PIK3CA/PTGS2/SIRT1/SLC2A1/TLR4/TP53	20
BP	GO:0006879	cellular iron ion homeostasis	11/172	66/18800	1.89354e-11	1.42402e-09	7.99719e-10	ACO1/FTH1/FTL/HIF1A/HMOX1/IFNG/ISCU/NCOA4/SLC40A1/TF/TFR2	11
BP	GO:0042149	cellular response to glucose starvation	10/172	50/18800	2.36588e-11	1.71624e-09	9.63832e-10	ASNS/ATF4/BECN1/HSPA5/NFE2L2/PRKAA1/SESN2/SIRT1/SLC2A1/TP53	10
BP	GO:0071216	cellular response to biotic stimulus	18/172	256/18800	2.37526e-11	1.71624e-09	9.63832e-10	CHMP5/DDIT3/HSF1/HSPA5/IL6/MAPK1/MAPK14/MAPK3/MAPK8/MTDH/NOS2/RELA/SRC/TLR4/TNFAIP3/TP53/TXNIP/ZFP36	18
BP	GO:0010508	positive regulation of autophagy	14/172	136/18800	2.72768e-11	1.90386e-09	1.0692e-09	ATG16L1/BECN1/BNIP3/HIF1A/HMOX1/IFNG/MAPK3/MTDH/PRKAA1/SESN2/SIRT1/SNX4/ULK2/WIPI1	14
BP	GO:1905037	autophagosome organization	13/172	111/18800	2.75037e-11	1.90386e-09	1.0692e-09	ATG16L1/ATG3/ATG4D/ATG5/ATG7/BECN1/GABARAPL1/GABARAPL2/MAP1LC3A/SNX4/ULK2/WIPI1/WIPI2	13
BP	GO:0071375	cellular response to peptide hormone stimulus	19/172	294/18800	2.78992e-11	1.90386e-09	1.0692e-09	CAV1/GCLC/GDF15/GOT1/HSF1/LPIN1/NFE2L2/PCK2/PIK3CA/PRKAA1/RB1/RELA/SIRT1/SLC2A8/SOCS1/SP1/SRC/STAT3/TRIB3	19
BP	GO:0045454	cell redox homeostasis	9/172	37/18800	3.6333e-11	2.37384e-09	1.33313e-09	DDIT3/EGLN2/GCLC/NFE2L2/NOS2/NQO1/PRDX1/PRDX6/TXNRD1	9
BP	GO:0071276	cellular response to cadmium ion	9/172	37/18800	3.6333e-11	2.37384e-09	1.33313e-09	CYBB/HMOX1/HSF1/JUN/MAPK1/MAPK3/MAPK8/MAPK9/MT1G	9
BP	GO:0055076	transition metal ion homeostasis	14/172	139/18800	3.67188e-11	2.37384e-09	1.33313e-09	ACO1/EPAS1/FTH1/FTL/HIF1A/HMOX1/IFNG/ISCU/MT1G/NCOA4/SLC40A1/STEAP3/TF/TFR2	14
BP	GO:0001659	temperature homeostasis	15/172	177/18800	8.59007e-11	5.45766e-09	3.06499e-09	ARNTL/ARRDC3/ATF4/CAV1/DDIT3/EPAS1/FH/HSF1/LPIN1/PTGS2/RB1/SCD/SQSTM1/STAT3/TLR4	15
BP	GO:0036294	cellular response to decreased oxygen levels	14/172	151/18800	1.12545e-10	7.02932e-09	3.94763e-09	ATF4/BACH1/BNIP3/CYBB/EGLN2/EPAS1/HIF1A/HMOX1/NFE2L2/PRKAA1/PTGS2/SIRT1/SRC/TP53	14
BP	GO:0046686	response to cadmium ion	10/172	59/18800	1.34819e-10	8.28014e-09	4.65008e-09	CYBB/GCLC/HMOX1/HSF1/JUN/MAPK1/MAPK3/MAPK8/MAPK9/MT1G	10
BP	GO:0016241	regulation of macroautophagy	14/172	158/18800	2.06619e-10	1.24818e-08	7.00972e-09	ATG5/ATP6V1G2/BECN1/BNIP3/HIF1A/HMOX1/MAPK3/MAPK8/PIK3CA/SESN2/SIRT1/SNX4/TP53/WIPI1	14
BP	GO:0043619	regulation of transcription from RNA polymerase II promoter in response to oxidative stress	6/172	11/18800	2.39017e-10	1.42061e-08	7.97805e-09	ATF4/EPAS1/HIF1A/HMOX1/NFE2L2/SESN2	6
BP	GO:0043467	regulation of generation of precursor metabolites and energy	13/172	134/18800	3.01973e-10	1.7663e-08	9.91945e-09	BNIP3/CISD1/DDIT4/HIF1A/IFNG/ISCU/NOS2/PHKG2/PIK3CA/PRKAA1/SLC2A6/STAT3/TP53	13
BP	GO:2001234	negative regulation of apoptotic signaling pathway	16/172	230/18800	3.77045e-10	2.17096e-08	1.2192e-08	BID/CD44/GCLC/HELLS/HIF1A/HMOX1/HSPB1/MUC1/NFE2L2/PTGS2/RB1/RELA/RIPK1/SIRT1/SRC/TNFAIP3	16
BP	GO:0042060	wound healing	21/172	429/18800	4.20323e-10	2.38291e-08	1.33823e-08	ALOX12/ALOX15/CAV1/CD44/CDKN1A/CHMP5/CHMP6/DUOX1/HIF1A/HMOX1/HNF4A/HRAS/HSPB1/IL6/MAP3K5/MAPK14/NFE2L2/PIK3CA/SRC/TLR4/TNFAIP3	21
BP	GO:0001819	positive regulation of cytokine production	22/172	475/18800	4.43941e-10	2.47867e-08	1.39201e-08	ALOX15B/ATF4/CYBB/DDIT3/HIF1A/HMOX1/HRAS/HSPB1/IFNG/IL6/MAPK14/NOS2/NOX1/PANX1/PTGS2/RELA/RIPK1/SIRT1/SLC7A5/SRC/STAT3/TLR4	22
BP	GO:0006995	cellular response to nitrogen starvation	6/172	12/18800	4.74417e-10	2.57092e-08	1.44381e-08	ATG5/ATG7/BECN1/GABARAPL1/GABARAPL2/MAP1LC3A	6
BP	GO:0043562	cellular response to nitrogen levels	6/172	12/18800	4.74417e-10	2.57092e-08	1.44381e-08	ATG5/ATG7/BECN1/GABARAPL1/GABARAPL2/MAP1LC3A	6
BP	GO:0046916	cellular transition metal ion homeostasis	12/172	115/18800	6.37508e-10	3.40466e-08	1.91204e-08	ACO1/FTH1/FTL/HIF1A/HMOX1/IFNG/ISCU/MT1G/NCOA4/SLC40A1/TF/TFR2	12
BP	GO:0071456	cellular response to hypoxia	13/172	143/18800	6.80849e-10	3.55582e-08	1.99692e-08	BACH1/BNIP3/CYBB/EGLN2/EPAS1/HIF1A/HMOX1/NFE2L2/PRKAA1/PTGS2/SIRT1/SRC/TP53	13
BP	GO:0090398	cellular senescence	11/172	91/18800	6.8511e-10	3.55582e-08	1.99692e-08	ARNTL/ATM/CDKN1A/HRAS/MAP3K5/MAPK14/MAPK8/MAPK9/PML/SIRT1/TP53	11
BP	GO:0048872	homeostasis of number of cells	17/172	282/18800	9.4986e-10	4.86144e-08	2.73015e-08	ACVR1B/BAP1/EPAS1/FH/FLT3/HIF1A/HMOX1/IL6/KRAS/MAPK14/PRDX1/RB1/SLC40A1/STAT3/TNFAIP3/TSC22D3/ZFP36	17
BP	GO:0006801	superoxide metabolic process	10/172	72/18800	1.03885e-09	5.24408e-08	2.94504e-08	ALOX12/CYBB/DUOX1/GCH1/NCF2/NFE2L2/NOS2/NOX1/NQO1/PRDX1	10
BP	GO:0009410	response to xenobiotic stimulus	20/172	411/18800	1.25146e-09	6.23191e-08	3.4998e-08	ABCC1/ATG5/BECN1/CA9/CYBB/GCLC/HMOX1/HNF4A/HSF1/HSPA5/JUN/NFE2L2/NOS2/NQO1/PRKAA1/PTGS2/RB1/SRC/TP53/TXNIP	20
BP	GO:1901522	positive regulation of transcription from RNA polymerase II promoter involved in cellular response to chemical stimulus	7/172	24/18800	1.44105e-09	7.08034e-08	3.97628e-08	ATF4/HIF1A/JUN/NFE2L2/RELA/SESN2/TP53	7
BP	GO:0036473	cell death in response to oxidative stress	11/172	98/18800	1.53498e-09	7.44265e-08	4.17975e-08	ATF4/FBXW7/HIF1A/HSPB1/MAP3K5/NFE2L2/NOX1/PML/RIPK1/SIRT1/TLR4	11
BP	GO:0061912	selective autophagy	10/172	76/18800	1.79207e-09	8.57632e-08	4.81641e-08	ATG16L1/ATG4D/ATG5/BECN1/MAPK3/SESN2/SQSTM1/TP53/ULK2/WIPI2	10
BP	GO:0010332	response to gamma radiation	9/172	56/18800	1.90684e-09	8.90907e-08	5.00328e-08	ATM/CDKN1A/FANCD2/HRAS/HSF1/HSPA5/PML/PRKAA1/TP53	9
BP	GO:0098869	cellular oxidant detoxification	11/172	100/18800	1.90995e-09	8.90907e-08	5.00328e-08	ALB/DUOX1/GCH1/GPX4/NFE2L2/NQO1/PRDX1/PRDX6/PTGS2/SESN2/TXNRD1	11
BP	GO:0008630	intrinsic apoptotic signaling pathway in response to DNA damage	11/172	101/18800	2.12657e-09	9.58053e-08	5.38037e-08	ATM/BID/CD44/CDKN1A/DDIT4/HIC1/HMOX1/MUC1/PML/SIRT1/TP53	11
BP	GO:1902882	regulation of response to oxidative stress	11/172	101/18800	2.12657e-09	9.58053e-08	5.38037e-08	ATF4/FBXW7/GCH1/HIF1A/HSPB1/NFE2L2/NOX1/RIPK1/SESN2/SIRT1/TLR4	11
BP	GO:0032868	response to insulin	16/172	259/18800	2.13189e-09	9.58053e-08	5.38037e-08	GCLC/GOT1/LPIN1/MAPK14/PCK2/PIK3CA/PRKAA1/RB1/SESN2/SIRT1/SLC2A1/SLC2A8/SOCS1/SP1/SRC/TRIB3	16
BP	GO:0072594	establishment of protein localization to organelle	20/172	431/18800	2.82947e-09	1.25622e-07	7.05484e-08	BAP1/BID/CDKN1A/DDIT3/ELAVL1/FBXW7/HSPA5/IFNG/LAMP2/MAPK14/MAPK8/NCOA4/PML/PRKAA1/PTGS2/SQSTM1/STAT3/TNFAIP3/TP53/TXNIP	20
BP	GO:0010660	regulation of muscle cell apoptotic process	10/172	81/18800	3.3907e-09	1.48747e-07	8.35352e-08	ALOX12/ATF4/BNIP3/HMOX1/HSF1/IFNG/MAP3K5/NFE2L2/SIRT1/TP53	10
BP	GO:2001235	positive regulation of apoptotic signaling pathway	12/172	134/18800	3.74929e-09	1.62543e-07	9.12829e-08	ATF3/BECN1/BID/CAV1/DDIT3/FBXW7/MAPK9/NOX1/PML/RIPK1/SIRT1/TP53	12
BP	GO:0050727	regulation of inflammatory response	19/172	394/18800	3.86752e-09	1.65719e-07	9.30665e-08	ABCC1/ALOX15/ATM/BAP1/BRD4/FANCD2/GPX4/IFNG/IL6/MAPK14/PTGS2/RB1/RELA/RIPK1/SNX4/SRC/TLR4/TNFAIP3/ZFP36	19
BP	GO:0044804	autophagy of nucleus	6/172	16/18800	3.98861e-09	1.68943e-07	9.48773e-08	ATG3/ATG5/ATG7/ULK2/WIPI1/WIPI2	6
BP	GO:0018105	peptidyl-serine phosphorylation	17/172	315/18800	5.06563e-09	2.12123e-07	1.19127e-07	ATM/AURKA/CAV1/CD44/DDIT4/IFNG/IL6/MAPK1/MAPK14/MAPK8/MAPK9/PIK3CA/PRKAA1/PTGS2/RIPK1/SRC/ULK2	17
BP	GO:0010657	muscle cell apoptotic process	10/172	85/18800	5.47371e-09	2.26636e-07	1.27277e-07	ALOX12/ATF4/BNIP3/HMOX1/HSF1/IFNG/MAP3K5/NFE2L2/SIRT1/TP53	10
BP	GO:0016053	organic acid biosynthetic process	17/172	318/18800	5.83694e-09	2.3899e-07	1.34215e-07	ALOX12/ALOX15/ALOX15B/ALOXE3/ASNS/CBS/CDO1/GLS2/GOT1/GPX4/PRKAA1/PSAT1/PTGS2/SCD/SCP2/SIRT1/TRIB3	17
BP	GO:0060249	anatomical structure homeostasis	17/172	319/18800	6.11713e-09	2.4771e-07	1.39112e-07	ALB/EPAS1/FH/HIF1A/HSPB1/IL6/KRAS/LAMP2/PRDX1/PRKAA1/PTGS2/RB1/SLC2A1/SRC/TF/TLR4/TNFAIP3	17
BP	GO:0008631	intrinsic apoptotic signaling pathway in response to oxidative stress	8/172	45/18800	6.73587e-09	2.69801e-07	1.51519e-07	FBXW7/HIF1A/HSPB1/MAP3K5/NFE2L2/NOX1/PML/SIRT1	8
BP	GO:1901216	positive regulation of neuron death	10/172	87/18800	6.88923e-09	2.72977e-07	1.53302e-07	ATF4/ATM/DDIT3/DDIT4/FBXW7/IFNG/MAP3K5/NQO1/TLR4/TP53	10
BP	GO:0043523	regulation of neuron apoptotic process	14/172	207/18800	7.11038e-09	2.78742e-07	1.5654e-07	ATF4/ATM/DDIT3/EGLN2/FBXW7/GCLC/HIF1A/HMOX1/HRAS/JUN/KRAS/NQO1/PIK3CA/TP53	14
BP	GO:0042770	signal transduction in response to DNA damage	13/172	174/18800	7.57009e-09	2.9364e-07	1.64906e-07	ATM/BID/CD44/CDKN1A/EIF2AK4/FANCD2/HIC1/MAPK14/MUC1/PML/SESN2/SIRT1/TP53	13
BP	GO:1990776	response to angiotensin	7/172	30/18800	8.09359e-09	3.10676e-07	1.74474e-07	CAV1/CYBB/HSF1/NFE2L2/PTGS2/RELA/SRC	7
BP	GO:1990748	cellular detoxification	11/172	115/18800	8.52574e-09	3.2389e-07	1.81895e-07	ALB/DUOX1/GCH1/GPX4/NFE2L2/NQO1/PRDX1/PRDX6/PTGS2/SESN2/TXNRD1	11
BP	GO:0106106	cold-induced thermogenesis	12/172	146/18800	9.96351e-09	3.70864e-07	2.08275e-07	ARNTL/ARRDC3/ATF4/CAV1/DDIT3/EPAS1/FH/HSF1/LPIN1/RB1/SCD/TLR4	12
BP	GO:0120161	regulation of cold-induced thermogenesis	12/172	146/18800	9.96351e-09	3.70864e-07	2.08275e-07	ARNTL/ARRDC3/ATF4/CAV1/DDIT3/EPAS1/FH/HSF1/LPIN1/RB1/SCD/TLR4	12
BP	GO:0048545	response to steroid hormone	17/172	330/18800	1.01296e-08	3.73277e-07	2.0963e-07	ARNTL/CAV1/CDO1/CYBB/DDIT4/EGLN2/FLT3/GOT1/IL6/NCOA4/PCK2/PIK3CA/PTGS2/SIRT1/SRC/TXNIP/ZFP36	17
BP	GO:0032496	response to lipopolysaccharide	17/172	333/18800	1.15827e-08	4.22598e-07	2.37328e-07	CHMP5/GCH1/HSF1/IL6/MAPK1/MAPK14/MAPK3/MAPK8/MTDH/NOS2/PCK2/PTGS2/RELA/SRC/TLR4/TNFAIP3/ZFP36	17
BP	GO:1900407	regulation of cellular response to oxidative stress	10/172	92/18800	1.19384e-08	4.31304e-07	2.42218e-07	ATF4/FBXW7/GCH1/HIF1A/HSPB1/NFE2L2/NOX1/RIPK1/SIRT1/TLR4	10
BP	GO:0071222	cellular response to lipopolysaccharide	14/172	217/18800	1.29908e-08	4.64769e-07	2.61011e-07	CHMP5/HSF1/IL6/MAPK1/MAPK14/MAPK3/MAPK8/MTDH/NOS2/RELA/SRC/TLR4/TNFAIP3/ZFP36	14
BP	GO:0098754	detoxification	12/172	150/18800	1.35235e-08	4.79175e-07	2.69102e-07	ALB/DUOX1/GCH1/GPX4/MT1G/NFE2L2/NQO1/PRDX1/PRDX6/PTGS2/SESN2/TXNRD1	12
BP	GO:0018209	peptidyl-serine modification	17/172	338/18800	1.44359e-08	5.06632e-07	2.84521e-07	ATM/AURKA/CAV1/CD44/DDIT4/IFNG/IL6/MAPK1/MAPK14/MAPK8/MAPK9/PIK3CA/PRKAA1/PTGS2/RIPK1/SRC/ULK2	17
BP	GO:0034976	response to endoplasmic reticulum stress	15/172	257/18800	1.49046e-08	5.17268e-07	2.90494e-07	ALOX15/ATF3/ATF4/CAV1/DDIT3/EIF2AK4/HSPA5/JUN/MAP3K5/NFE2L2/PML/SESN2/SIRT1/TP53/TRIB3	15
BP	GO:0048511	rhythmic process	16/172	297/18800	1.50197e-08	5.17268e-07	2.90494e-07	ARNTL/ATF4/ATG7/DRD4/FBXW7/HNF4A/HSPA5/MAPK8/MAPK9/NOS2/PML/PRKAA1/SIRT1/SP1/SRC/TP53	16
BP	GO:0048732	gland development	19/172	431/18800	1.65401e-08	5.64354e-07	3.16938e-07	ALOX15B/ATM/AURKA/CAV1/CDO1/FBXW7/HIF1A/HMOX1/HNF4A/IL6/JUN/MAPK1/MAPK3/PCK2/PIK3CA/PML/RELA/SRC/TNFAIP3	19
BP	GO:0097237	cellular response to toxic substance	11/172	123/18800	1.73383e-08	5.8616e-07	3.29184e-07	ALB/DUOX1/GCH1/GPX4/NFE2L2/NQO1/PRDX1/PRDX6/PTGS2/SESN2/TXNRD1	11
BP	GO:0005996	monosaccharide metabolic process	15/172	261/18800	1.83248e-08	6.13881e-07	3.44752e-07	ATF3/ATF4/GCLC/MAPK14/PCK2/PGD/PHKG2/PIK3CA/PRKAA1/SESN2/SIRT1/SLC2A1/SLC2A3/SRC/TP53	15
BP	GO:0030330	DNA damage response, signal transduction by p53 class mediator	9/172	72/18800	1.89022e-08	6.27518e-07	3.5241e-07	ATM/CD44/CDKN1A/HIC1/MUC1/PML/SESN2/SIRT1/TP53	9
BP	GO:0007033	vacuole organization	13/172	188/18800	1.91957e-08	6.31572e-07	3.54687e-07	ATG16L1/ATG3/ATG4D/ATG5/ATG7/BECN1/GABARAPL1/GABARAPL2/MAP1LC3A/SNX4/ULK2/WIPI1/WIPI2	13
BP	GO:0030099	myeloid cell differentiation	18/172	391/18800	2.08403e-08	6.79615e-07	3.81668e-07	ACVR1B/EPAS1/FBXW7/HIF1A/HSF1/IFNG/JUN/MAPK14/MT1G/PML/RB1/RIPK1/SIRT1/SRC/STAT3/TF/TLR4/ZFP36	18
BP	GO:0016239	positive regulation of macroautophagy	9/172	73/18800	2.13923e-08	6.91498e-07	3.88341e-07	BECN1/BNIP3/HIF1A/HMOX1/MAPK3/SESN2/SIRT1/SNX4/WIPI1	9
BP	GO:1901654	response to ketone	13/172	190/18800	2.17808e-08	6.97933e-07	3.91955e-07	CA9/CAV1/CYBB/DDIT4/HSF1/NCOA4/NQO1/PCK2/PIK3CA/PRKAA1/SIRT1/SRC/TXNIP	13
BP	GO:0006631	fatty acid metabolic process	18/172	395/18800	2.4354e-08	7.73658e-07	4.34482e-07	ACSL3/ACSL4/ALOX12/ALOX15/ALOX15B/ALOXE3/CAV1/GPX4/LPIN1/MAPK14/PCK2/PRKAA1/PTGS2/SCD/SCP2/SESN2/SIRT1/TRIB3	18
BP	GO:0071219	cellular response to molecule of bacterial origin	14/172	229/18800	2.56852e-08	8.08975e-07	4.54316e-07	CHMP5/HSF1/IL6/MAPK1/MAPK14/MAPK3/MAPK8/MTDH/NOS2/RELA/SRC/TLR4/TNFAIP3/ZFP36	14
BP	GO:1990845	adaptive thermogenesis	12/172	159/18800	2.602e-08	8.12573e-07	4.56336e-07	ARNTL/ARRDC3/ATF4/CAV1/DDIT3/EPAS1/FH/HSF1/LPIN1/RB1/SCD/TLR4	12
BP	GO:0019372	lipoxygenase pathway	5/172	11/18800	2.67236e-08	8.20638e-07	4.60865e-07	ALOX12/ALOX15/ALOX15B/ALOXE3/GPX4	5
BP	GO:1990440	positive regulation of transcription from RNA polymerase II promoter in response to endoplasmic reticulum stress	5/172	11/18800	2.67236e-08	8.20638e-07	4.60865e-07	ATF3/ATF4/DDIT3/HSPA5/TP53	5
BP	GO:0006091	generation of precursor metabolites and energy	20/172	494/18800	2.80083e-08	8.52981e-07	4.79029e-07	ACO1/BID/BNIP3/CISD1/CS/CYBB/DDIT4/FH/HIF1A/IFNG/ISCU/NCF2/NOS2/PGD/PHKG2/PIK3CA/PRKAA1/SLC2A6/STAT3/TP53	20
BP	GO:0002237	response to molecule of bacterial origin	17/172	354/18800	2.84647e-08	8.59775e-07	4.82845e-07	CHMP5/GCH1/HSF1/IL6/MAPK1/MAPK14/MAPK3/MAPK8/MTDH/NOS2/PCK2/PTGS2/RELA/SRC/TLR4/TNFAIP3/ZFP36	17
BP	GO:0051223	regulation of protein transport	20/172	495/18800	2.89595e-08	8.67606e-07	4.87243e-07	ACSL3/ACSL4/ARNTL/BAP1/DRD4/FBXW7/HIF1A/HNF4A/HRAS/IFNG/IL6/MAPK14/MAPK8/NOS2/PCK2/PRKAA1/PTGS2/SRC/TLR4/YWHAE	20
BP	GO:2001243	negative regulation of intrinsic apoptotic signaling pathway	10/172	102/18800	3.26029e-08	9.68885e-07	5.4412e-07	BID/CD44/HELLS/HIF1A/HSPB1/MUC1/NFE2L2/PTGS2/SIRT1/SRC	10
BP	GO:1903201	regulation of oxidative stress-induced cell death	9/172	77/18800	3.44533e-08	1.01568e-06	5.70401e-07	ATF4/FBXW7/HIF1A/HSPB1/NFE2L2/NOX1/RIPK1/SIRT1/TLR4	9
BP	GO:0043470	regulation of carbohydrate catabolic process	8/172	55/18800	3.52034e-08	1.02396e-06	5.75052e-07	DDIT4/HIF1A/IFNG/PHKG2/PRKAA1/SLC2A6/STAT3/TP53	8
BP	GO:0051090	regulation of DNA-binding transcription factor activity	19/172	452/18800	3.52899e-08	1.02396e-06	5.75052e-07	CAV1/DDIT3/EIF2AK4/FANCD2/HMOX1/HSF1/IL6/KEAP1/MAPK3/MAPK8/MAPK9/MTDH/RB1/RELA/RIPK1/SIRT1/STAT3/TLR4/TNFAIP3	19
BP	GO:0046394	carboxylic acid biosynthetic process	16/172	316/18800	3.57573e-08	1.02942e-06	5.78116e-07	ALOX12/ALOX15/ALOX15B/ALOXE3/ASNS/CBS/GLS2/GOT1/GPX4/PRKAA1/PSAT1/PTGS2/SCD/SCP2/SIRT1/TRIB3	16
BP	GO:0009612	response to mechanical stimulus	13/172	201/18800	4.2491e-08	1.21379e-06	6.81658e-07	BNIP3/GCLC/JUN/MAPK14/MAPK3/MAPK8/PIK3CA/PTGS2/RELA/SLC2A1/SRC/TLR4/TXNIP	13
BP	GO:0007623	circadian rhythm	13/172	205/18800	5.36118e-08	1.50809e-06	8.46933e-07	ARNTL/ATF4/ATG7/DRD4/FBXW7/HNF4A/MAPK8/MAPK9/NOS2/PML/PRKAA1/SIRT1/TP53	13
BP	GO:0032869	cellular response to insulin stimulus	13/172	205/18800	5.36118e-08	1.50809e-06	8.46933e-07	GCLC/GOT1/LPIN1/PCK2/PIK3CA/PRKAA1/RB1/SIRT1/SLC2A8/SOCS1/SP1/SRC/TRIB3	13
BP	GO:0045926	negative regulation of growth	14/172	245/18800	5.98611e-08	1.67112e-06	9.38492e-07	ACVR1B/ALOX15B/CDKN1A/GDF15/HIF1A/HNF4A/MT1G/PML/RB1/RGS4/SESN2/SIRT1/TP53/ULK2	14
BP	GO:0006826	iron ion transport	8/172	59/18800	6.21522e-08	1.72204e-06	9.67086e-07	FTH1/FTL/IFNG/ISCU/SLC40A1/STEAP3/TF/TFR2	8
BP	GO:0034612	response to tumor necrosis factor	14/172	249/18800	7.32113e-08	2.01331e-06	1.13066e-06	GCH1/MAP3K5/MAPK1/MAPK14/MAPK3/NFE2L2/PCK2/PTGS2/RELA/RIPK1/SIRT1/TNFAIP3/TP53/ZFP36	14
BP	GO:0010212	response to ionizing radiation	11/172	142/18800	7.72122e-08	2.10761e-06	1.18362e-06	ATM/CDKN1A/FANCD2/HRAS/HSF1/HSPA5/MAPK14/PML/PRKAA1/SIRT1/TP53	11
BP	GO:2001244	positive regulation of intrinsic apoptotic signaling pathway	8/172	61/18800	8.12668e-08	2.20197e-06	1.23661e-06	BECN1/BID/CAV1/DDIT3/FBXW7/NOX1/SIRT1/TP53	8
BP	GO:0051222	positive regulation of protein transport	15/172	293/18800	8.44266e-08	2.27089e-06	1.27532e-06	ACSL3/ACSL4/BAP1/FBXW7/HIF1A/HRAS/IFNG/MAPK14/MAPK8/PCK2/PRKAA1/PTGS2/SRC/TLR4/YWHAE	15
BP	GO:0034504	protein localization to nucleus	15/172	294/18800	8.82657e-08	2.35695e-06	1.32365e-06	CDKN1A/DNAJB6/ELAVL1/IFNG/MAPK14/NF2/PML/PTGS2/SESN2/SQSTM1/SRC/STAT3/TP53/TXNIP/YWHAE	15
BP	GO:2000377	regulation of reactive oxygen species metabolic process	11/172	147/18800	1.10134e-07	2.91974e-06	1.63971e-06	ATG5/BECN1/BNIP3/CDKN1A/GCH1/HIF1A/MAPK14/NFE2L2/RIPK1/TLR4/TP53	11
BP	GO:0010638	positive regulation of organelle organization	19/172	487/18800	1.1367e-07	2.99197e-06	1.68027e-06	ALOX15/ATM/AURKA/BECN1/BID/BNIP3/HIF1A/HRAS/MAPK1/MAPK3/MAPK8/MAPK9/NF2/PML/RB1/SNX4/SRC/TP53/WIPI1	19
BP	GO:0042771	intrinsic apoptotic signaling pathway in response to DNA damage by p53 class mediator	7/172	43/18800	1.15917e-07	3.00904e-06	1.68986e-06	CD44/CDKN1A/DDIT4/MUC1/PML/SIRT1/TP53	7
BP	GO:0009314	response to radiation	18/172	438/18800	1.15952e-07	3.00904e-06	1.68986e-06	ATF4/ATM/CDKN1A/EIF2AK4/FANCD2/HIF1A/HRAS/HSF1/HSPA5/KRAS/MAPK14/MAPK8/PML/PRKAA1/PTGS2/RELA/SIRT1/TP53	18
BP	GO:0042752	regulation of circadian rhythm	10/172	117/18800	1.21354e-07	3.1272e-06	1.75622e-06	ARNTL/ATG7/DRD4/FBXW7/HNF4A/MAPK8/MAPK9/PML/PRKAA1/TP53	10
BP	GO:0045936	negative regulation of phosphate metabolic process	18/172	440/18800	1.24096e-07	3.17565e-06	1.78343e-06	CAV1/CDKN1A/CHMP6/DDIT4/DUSP1/HSPB1/IFNG/JUN/LPIN1/NF2/RB1/SIRT1/SOCS1/STAT3/TNFAIP3/TP53/TRIB3/YWHAE	18
BP	GO:0010563	negative regulation of phosphorus metabolic process	18/172	441/18800	1.28361e-07	3.26215e-06	1.832e-06	CAV1/CDKN1A/CHMP6/DDIT4/DUSP1/HSPB1/IFNG/JUN/LPIN1/NF2/RB1/SIRT1/SOCS1/STAT3/TNFAIP3/TP53/TRIB3/YWHAE	18
BP	GO:0042176	regulation of protein catabolic process	17/172	395/18800	1.38305e-07	3.49078e-06	1.9604e-06	ATG7/AURKA/CAV1/CHMP6/EGLN2/FBXW7/GABARAPL2/GCLC/IFNG/KEAP1/MAPK9/NFE2L2/NOS2/PML/RELA/TNFAIP3/TRIB3	17
BP	GO:0030522	intracellular receptor signaling pathway	14/172	264/18800	1.50706e-07	3.7779e-06	2.12164e-06	ALOX15/ALOX15B/ALOXE3/ARNTL/EGLN2/HNF4A/NCOA4/PML/RELA/SIRT1/SRC/STAT3/TLR4/TNFAIP3	14
BP	GO:1904951	positive regulation of establishment of protein localization	15/172	309/18800	1.68378e-07	4.19238e-06	2.35441e-06	ACSL3/ACSL4/BAP1/FBXW7/HIF1A/HRAS/IFNG/MAPK14/MAPK8/PCK2/PRKAA1/PTGS2/SRC/TLR4/YWHAE	15
BP	GO:0032007	negative regulation of TOR signaling	7/172	46/18800	1.88148e-07	4.6532e-06	2.61321e-06	ARNTL/ATM/DDIT4/HIF1A/PRKAA1/SESN2/SIRT1	7
BP	GO:0051348	negative regulation of transferase activity	14/172	270/18800	1.98439e-07	4.87497e-06	2.73776e-06	CAV1/CDKN1A/CHMP6/DUSP1/HSPB1/IFNG/NF2/RB1/SIRT1/SRC/TNFAIP3/TP53/TRIB3/ZFP36	14
BP	GO:1902175	regulation of oxidative stress-induced intrinsic apoptotic signaling pathway	6/172	29/18800	2.14379e-07	5.21892e-06	2.93091e-06	FBXW7/HIF1A/HSPB1/NFE2L2/NOX1/SIRT1	6
BP	GO:0031960	response to corticosteroid	11/172	157/18800	2.15272e-07	5.21892e-06	2.93091e-06	CDO1/CYBB/DDIT4/FLT3/GOT1/IL6/PCK2/PIK3CA/PTGS2/SRC/ZFP36	11
BP	GO:0001894	tissue homeostasis	14/172	272/18800	2.17145e-07	5.22993e-06	2.9371e-06	ALB/EPAS1/FH/HSPB1/IL6/KRAS/PRDX1/PTGS2/RB1/SLC2A1/SRC/TF/TLR4/TNFAIP3	14
BP	GO:0002262	myeloid cell homeostasis	11/172	160/18800	2.60699e-07	6.23815e-06	3.50331e-06	ACVR1B/BAP1/EPAS1/HIF1A/HMOX1/IL6/MAPK14/PRDX1/RB1/STAT3/ZFP36	11
BP	GO:0071480	cellular response to gamma radiation	6/172	30/18800	2.6595e-07	6.32276e-06	3.55082e-06	ATM/CDKN1A/HRAS/HSF1/HSPA5/TP53	6
BP	GO:0045862	positive regulation of proteolysis	16/172	369/18800	2.97524e-07	7.02806e-06	3.94692e-06	AURKA/BID/CAV1/FBXW7/GCLC/HSF1/IFNG/KEAP1/MAP3K5/MAPK9/NFE2L2/PML/SIRT1/SRC/STAT3/TRIB3	16
BP	GO:0009895	negative regulation of catabolic process	15/172	324/18800	3.09507e-07	7.26454e-06	4.07972e-06	ATG7/BECN1/DDIT4/ELAVL1/GABARAPL2/HMOX1/MAPK14/NOS2/PIK3CA/PML/PRKAA1/RELA/STAT3/TP53/ZFP36	15
BP	GO:0043457	regulation of cellular respiration	7/172	50/18800	3.40479e-07	7.94091e-06	4.45957e-06	BNIP3/CISD1/HIF1A/IFNG/ISCU/NOS2/PIK3CA	7
BP	GO:0071479	cellular response to ionizing radiation	8/172	75/18800	4.17637e-07	9.67919e-06	5.43577e-06	ATM/CDKN1A/HRAS/HSF1/HSPA5/MAPK14/SIRT1/TP53	8
BP	GO:0051403	stress-activated MAPK cascade	13/172	245/18800	4.23131e-07	9.74524e-06	5.47287e-06	DUSP1/HRAS/MAP3K5/MAPK1/MAPK14/MAPK3/MAPK8/MAPK9/NOX1/PRDX1/RIPK1/TLR4/ZFP36	13
BP	GO:0001889	liver development	10/172	134/18800	4.34139e-07	9.93667e-06	5.58037e-06	AURKA/FBXW7/HMOX1/HNF4A/IL6/JUN/PCK2/PIK3CA/RELA/TNFAIP3	10
BP	GO:1903320	regulation of protein modification by small protein conjugation or removal	13/172	246/18800	4.43226e-07	1.0082e-05	5.662e-06	ARRDC3/ATG5/CAV1/EPAS1/FBXW7/GCLC/HIF1A/HSPA5/MAPK9/RELA/SQSTM1/TNFAIP3/TRIB3	13
BP	GO:0009636	response to toxic substance	13/172	247/18800	4.6417e-07	1.04937e-05	5.89318e-06	ALB/ATF4/DUOX1/GCH1/GPX4/MT1G/NFE2L2/NQO1/PRDX1/PRDX6/PTGS2/SESN2/TXNRD1	13
BP	GO:0006977	DNA damage response, signal transduction by p53 class mediator resulting in cell cycle arrest	5/172	18/18800	4.70515e-07	1.05722e-05	5.93731e-06	ATM/CDKN1A/MUC1/PML/TP53	5
BP	GO:0048660	regulation of smooth muscle cell proliferation	11/172	170/18800	4.79452e-07	1.06433e-05	5.97719e-06	CDKN1A/HMOX1/IFNG/IL6/JUN/MAP3K5/NOX1/PIK3CA/PTGS2/TLR4/TNFAIP3	11
BP	GO:0072331	signal transduction by p53 class mediator	11/172	170/18800	4.79452e-07	1.06433e-05	5.97719e-06	ATM/AURKA/CD44/CDKN1A/DDIT4/HIC1/MUC1/PML/SESN2/SIRT1/TP53	11
BP	GO:0061008	hepaticobiliary system development	10/172	137/18800	5.33231e-07	1.17662e-05	6.60783e-06	AURKA/FBXW7/HMOX1/HNF4A/IL6/JUN/PCK2/PIK3CA/RELA/TNFAIP3	10
BP	GO:0002573	myeloid leukocyte differentiation	12/172	210/18800	5.44736e-07	1.19485e-05	6.71022e-06	FBXW7/HSF1/IFNG/JUN/MAPK14/MT1G/RB1/RIPK1/SIRT1/SRC/TF/TLR4	12
BP	GO:0048659	smooth muscle cell proliferation	11/172	173/18800	5.70954e-07	1.24495e-05	6.99156e-06	CDKN1A/HMOX1/IFNG/IL6/JUN/MAP3K5/NOX1/PIK3CA/PTGS2/TLR4/TNFAIP3	11
BP	GO:0031098	stress-activated protein kinase signaling cascade	13/172	252/18800	5.82765e-07	1.26323e-05	7.09422e-06	DUSP1/HRAS/MAP3K5/MAPK1/MAPK14/MAPK3/MAPK8/MAPK9/NOX1/PRDX1/RIPK1/TLR4/ZFP36	13
BP	GO:0010634	positive regulation of epithelial cell migration	11/172	174/18800	6.04707e-07	1.30313e-05	7.31827e-06	ENPP2/HIF1A/HMOX1/HSPB1/IFNG/JUN/NFE2L2/PTGS2/SIRT1/SP1/SRC	11
BP	GO:0062012	regulation of small molecule metabolic process	15/172	342/18800	6.1483e-07	1.31724e-05	7.39753e-06	CAV1/DDIT4/HIF1A/IFNG/NOS2/PHKG2/PRKAA1/PTGS2/SESN2/SIRT1/SLC2A6/SRC/STAT3/TP53/TRIB3	15
BP	GO:0009615	response to virus	16/172	392/18800	6.65745e-07	1.41807e-05	7.96382e-06	ATG16L1/ATG5/ATG7/BECN1/BNIP3/DDIT4/EIF2AK4/HIF1A/HSPB1/IFNG/IL6/MAPK14/PML/RELA/SRC/TNFAIP3	16
BP	GO:0009408	response to heat	9/172	109/18800	7.09087e-07	1.50172e-05	8.43355e-06	ATM/DNAJB6/GCLC/HMOX1/HSF1/HSPB1/PTGS2/SIRT1/YWHAE	9
BP	GO:1903829	positive regulation of protein localization	17/172	446/18800	7.58851e-07	1.59792e-05	8.97384e-06	ACSL3/ACSL4/BAP1/FBXW7/HIF1A/HRAS/IFNG/MAPK14/MAPK8/PCK2/PRKAA1/PTGS2/SESN2/SQSTM1/SRC/TLR4/YWHAE	17
BP	GO:0001676	long-chain fatty acid metabolic process	9/172	111/18800	8.27392e-07	1.73235e-05	9.72879e-06	ACSL3/ACSL4/ALOX12/ALOX15/ALOX15B/ALOXE3/GPX4/PTGS2/SCP2	9
BP	GO:0009266	response to temperature stimulus	11/172	180/18800	8.46758e-07	1.76288e-05	9.90025e-06	ATM/DNAJB6/EIF2AK4/GCLC/HMOX1/HSF1/HSPB1/PRKAA1/PTGS2/SIRT1/YWHAE	11
BP	GO:0050730	regulation of peptidyl-tyrosine phosphorylation	13/172	261/18800	8.6605e-07	1.79292e-05	1.00689e-05	CAV1/CD44/CHMP6/ENPP2/FBXW7/FLT3/HSF1/IFNG/IL6/NF2/SOCS1/SRC/TP53	13
BP	GO:0097191	extrinsic apoptotic signaling pathway	12/172	221/18800	9.36774e-07	1.9285e-05	1.08303e-05	ACVR1B/ATF3/BID/CAV1/GCLC/HMOX1/IFNG/PML/RELA/RIPK1/SRC/TNFAIP3	12
BP	GO:0009411	response to UV	10/172	146/18800	9.58923e-07	1.96313e-05	1.10248e-05	ATF4/CDKN1A/EIF2AK4/MAPK8/PML/PRKAA1/PTGS2/RELA/SIRT1/TP53	10
BP	GO:0006109	regulation of carbohydrate metabolic process	11/172	183/18800	9.9709e-07	2.02999e-05	1.14003e-05	DDIT4/HIF1A/IFNG/PHKG2/PRKAA1/SESN2/SIRT1/SLC2A6/SRC/STAT3/TP53	11
BP	GO:0046777	protein autophosphorylation	12/172	224/18800	1.08001e-06	2.18673e-05	1.22805e-05	ACVR1B/ATM/AURKA/CAV1/EIF2AK4/FLT3/JUN/MAPK3/OXSR1/RIPK1/SRC/ULK2	12
BP	GO:0033559	unsaturated fatty acid metabolic process	9/172	115/18800	1.11605e-06	2.24734e-05	1.26209e-05	ALOX12/ALOX15/ALOX15B/ALOXE3/GPX4/PTGS2/SCD/SCP2/SIRT1	9
BP	GO:0071478	cellular response to radiation	11/172	187/18800	1.23385e-06	2.47106e-05	1.38773e-05	ATF4/ATM/CDKN1A/EIF2AK4/HRAS/HSF1/HSPA5/MAPK14/PTGS2/SIRT1/TP53	11
BP	GO:0051409	response to nitrosative stress	4/172	10/18800	1.36113e-06	2.69882e-05	1.51564e-05	ATG5/ATM/DDIT3/GCLC	4
BP	GO:0071356	cellular response to tumor necrosis factor	12/172	229/18800	1.36223e-06	2.69882e-05	1.51564e-05	MAP3K5/MAPK1/MAPK14/MAPK3/NFE2L2/PCK2/RELA/RIPK1/SIRT1/TNFAIP3/TP53/ZFP36	12
BP	GO:1904019	epithelial cell apoptotic process	9/172	118/18800	1.38613e-06	2.73149e-05	1.53399e-05	BID/HMOX1/IL6/MAP3K5/NFE2L2/PRKAA1/RB1/TNFAIP3/ZFP36	9
BP	GO:0140467	integrated stress response signaling	5/172	22/18800	1.40389e-06	2.75177e-05	1.54538e-05	ATF4/DDIT3/EIF2AK4/HSPA5/NFE2L2	5
BP	GO:2001236	regulation of extrinsic apoptotic signaling pathway	10/172	153/18800	1.47137e-06	2.86879e-05	1.6111e-05	ATF3/BID/CAV1/GCLC/HMOX1/PML/RELA/RIPK1/SRC/TNFAIP3	10
BP	GO:0032757	positive regulation of interleukin-8 production	7/172	62/18800	1.52877e-06	2.96501e-05	1.66513e-05	DDIT3/IL6/NOS2/RELA/RIPK1/STAT3/TLR4	7
BP	GO:0033002	muscle cell proliferation	12/172	233/18800	1.63313e-06	3.13442e-05	1.76027e-05	CDKN1A/HMOX1/IFNG/IL6/JUN/MAP3K5/MAPK14/NOX1/PIK3CA/PTGS2/TLR4/TNFAIP3	12
BP	GO:0045732	positive regulation of protein catabolic process	12/172	233/18800	1.63313e-06	3.13442e-05	1.76027e-05	ATG7/AURKA/CAV1/EGLN2/FBXW7/GCLC/IFNG/KEAP1/MAPK9/NFE2L2/TNFAIP3/TRIB3	12
BP	GO:0070059	intrinsic apoptotic signaling pathway in response to endoplasmic reticulum stress	7/172	63/18800	1.70671e-06	3.25868e-05	1.83005e-05	ATF4/DDIT3/MAP3K5/PML/SIRT1/TP53/TRIB3	7
BP	GO:0071900	regulation of protein serine/threonine kinase activity	15/172	372/18800	1.75634e-06	3.33615e-05	1.87356e-05	CAV1/CDKN1A/DRD4/DUSP1/FLT3/HRAS/IFNG/MAP3K5/RB1/SESN2/SIRT1/SRC/TLR4/TNFAIP3/TRIB3	15
BP	GO:0045444	fat cell differentiation	12/172	237/18800	1.95065e-06	3.68623e-05	2.07017e-05	ALOXE3/ARNTL/BNIP3/DDIT3/IL6/JDP2/MAPK14/PTGS2/SIRT1/SOCS1/TRIB3/ZFP36	12
BP	GO:0006606	protein import into nucleus	10/172	159/18800	2.08628e-06	3.92242e-05	2.20281e-05	CDKN1A/ELAVL1/IFNG/MAPK14/PML/PTGS2/SQSTM1/STAT3/TP53/TXNIP	10
BP	GO:0072584	caveolin-mediated endocytosis	4/172	11/18800	2.12365e-06	3.97241e-05	2.23088e-05	CAV1/MAPK1/MAPK3/SRC	4
BP	GO:0060964	regulation of miRNA-mediated gene silencing	6/172	42/18800	2.14546e-06	3.99294e-05	2.24241e-05	ELAVL1/IL6/RIPK1/STAT3/TP53/ZFP36	6
BP	GO:2000637	positive regulation of miRNA-mediated gene silencing	5/172	24/18800	2.23259e-06	4.13422e-05	2.32175e-05	IL6/RIPK1/STAT3/TP53/ZFP36	5
BP	GO:0034605	cellular response to heat	7/172	66/18800	2.3477e-06	4.32563e-05	2.42925e-05	ATM/DNAJB6/HMOX1/HSF1/PTGS2/SIRT1/YWHAE	7
BP	GO:0042326	negative regulation of phosphorylation	15/172	382/18800	2.43438e-06	4.46021e-05	2.50483e-05	CAV1/CDKN1A/CHMP6/DDIT4/DUSP1/HSPB1/IFNG/JUN/NF2/RB1/SIRT1/SOCS1/STAT3/TNFAIP3/TRIB3	15
BP	GO:0019221	cytokine-mediated signaling pathway	17/172	486/18800	2.44495e-06	4.46021e-05	2.50483e-05	CAV1/CD44/DUOX1/FLT3/HIF1A/IFNG/IL6/MAPK3/OXSR1/RELA/RIPK1/SIRT1/SOCS1/SRC/STAT3/TNFAIP3/TP53	17
BP	GO:0006633	fatty acid biosynthetic process	10/172	162/18800	2.47005e-06	4.48382e-05	2.51808e-05	ALOX12/ALOX15/ALOX15B/ALOXE3/GPX4/PRKAA1/PTGS2/SCD/SIRT1/TRIB3	10
BP	GO:0006006	glucose metabolic process	11/172	201/18800	2.49783e-06	4.512e-05	2.53391e-05	ATF3/ATF4/MAPK14/PCK2/PHKG2/PIK3CA/PRKAA1/SESN2/SIRT1/SRC/TP53	11
BP	GO:0048661	positive regulation of smooth muscle cell proliferation	8/172	95/18800	2.57668e-06	4.63174e-05	2.60115e-05	HMOX1/IL6/JUN/MAP3K5/NOX1/PIK3CA/PTGS2/TLR4	8
BP	GO:0051170	import into nucleus	10/172	163/18800	2.61094e-06	4.67055e-05	2.62295e-05	CDKN1A/ELAVL1/IFNG/MAPK14/PML/PTGS2/SQSTM1/STAT3/TP53/TXNIP	10
BP	GO:1901605	alpha-amino acid metabolic process	11/172	203/18800	2.74943e-06	4.8842e-05	2.74294e-05	ASNS/ATF4/CBS/CDO1/GCLC/GLS2/GOT1/GPT2/HNF4A/NOS2/PSAT1	11
BP	GO:0060148	positive regulation of post-transcriptional gene silencing	5/172	25/18800	2.77014e-06	4.8842e-05	2.74294e-05	IL6/RIPK1/STAT3/TP53/ZFP36	5
BP	GO:1900370	positive regulation of post-transcriptional gene silencing by RNA	5/172	25/18800	2.77014e-06	4.8842e-05	2.74294e-05	IL6/RIPK1/STAT3/TP53/ZFP36	5
BP	GO:0060147	regulation of post-transcriptional gene silencing	6/172	44/18800	2.8437e-06	4.96636e-05	2.78908e-05	ELAVL1/IL6/RIPK1/STAT3/TP53/ZFP36	6
BP	GO:1900368	regulation of post-transcriptional gene silencing by RNA	6/172	44/18800	2.8437e-06	4.96636e-05	2.78908e-05	ELAVL1/IL6/RIPK1/STAT3/TP53/ZFP36	6
BP	GO:0002532	production of molecular mediator involved in inflammatory response	8/172	97/18800	3.01647e-06	5.24326e-05	2.94458e-05	BAP1/HIF1A/IL6/MAPK14/NOS2/SNX4/STAT3/TLR4	8
BP	GO:0001933	negative regulation of protein phosphorylation	14/172	341/18800	3.19818e-06	5.533e-05	3.1073e-05	CAV1/CDKN1A/CHMP6/DDIT4/DUSP1/HSPB1/IFNG/JUN/NF2/RB1/SIRT1/SOCS1/TNFAIP3/TRIB3	14
BP	GO:0006110	regulation of glycolytic process	6/172	45/18800	3.25646e-06	5.58142e-05	3.13449e-05	DDIT4/HIF1A/IFNG/PRKAA1/SLC2A6/STAT3	6
BP	GO:0006984	ER-nucleus signaling pathway	6/172	45/18800	3.25646e-06	5.58142e-05	3.13449e-05	ATF4/DDIT3/FBXW7/HSPA5/NFE2L2/TP53	6
BP	GO:1904385	cellular response to angiotensin	5/172	26/18800	3.40439e-06	5.80795e-05	3.26171e-05	CAV1/HSF1/NFE2L2/RELA/SRC	5
BP	GO:0045637	regulation of myeloid cell differentiation	11/172	208/18800	3.47803e-06	5.90624e-05	3.31691e-05	ACVR1B/FBXW7/HIF1A/HSF1/IFNG/MAPK14/RB1/RIPK1/STAT3/TLR4/ZFP36	11
BP	GO:0071260	cellular response to mechanical stimulus	7/172	70/18800	3.50452e-06	5.92025e-05	3.32478e-05	BNIP3/GCLC/MAPK3/MAPK8/PTGS2/SLC2A1/TLR4	7
BP	GO:0045639	positive regulation of myeloid cell differentiation	8/172	99/18800	3.51841e-06	5.92025e-05	3.32478e-05	ACVR1B/HIF1A/HSF1/IFNG/MAPK14/RB1/RIPK1/STAT3	8
BP	GO:0060966	regulation of gene silencing by RNA	6/172	46/18800	3.7167e-06	6.22548e-05	3.49619e-05	ELAVL1/IL6/RIPK1/STAT3/TP53/ZFP36	6
BP	GO:0034101	erythrocyte homeostasis	9/172	133/18800	3.75279e-06	6.25748e-05	3.51417e-05	ACVR1B/EPAS1/HIF1A/HMOX1/MAPK14/PRDX1/RB1/STAT3/ZFP36	9
BP	GO:0017038	protein import	11/172	210/18800	3.81372e-06	6.33044e-05	3.55514e-05	CDKN1A/ELAVL1/IFNG/LAMP2/MAPK14/PML/PTGS2/SQSTM1/STAT3/TP53/TXNIP	11
BP	GO:0000041	transition metal ion transport	8/172	101/18800	4.08948e-06	6.75773e-05	3.7951e-05	FTH1/FTL/IFNG/ISCU/SLC40A1/STEAP3/TF/TFR2	8
BP	GO:0071280	cellular response to copper ion	5/172	27/18800	4.14729e-06	6.80966e-05	3.82426e-05	BECN1/HSF1/MAP1LC3A/MT1G/NFE2L2	5
BP	GO:0044843	cell cycle G1/S phase transition	12/172	255/18800	4.15787e-06	6.80966e-05	3.82426e-05	ACVR1B/ATM/BACH1/BID/BRD4/CDKN1A/FBXW7/MUC1/PML/RB1/RRM2/TP53	12
BP	GO:0120163	negative regulation of cold-induced thermogenesis	6/172	47/18800	4.22851e-06	6.89471e-05	3.87203e-05	ARNTL/ARRDC3/ATF4/DDIT3/RB1/TLR4	6
BP	GO:0006469	negative regulation of protein kinase activity	11/172	213/18800	4.37043e-06	7.09472e-05	3.98435e-05	CAV1/CDKN1A/CHMP6/DUSP1/HSPB1/IFNG/NF2/RB1/SIRT1/TNFAIP3/TRIB3	11
BP	GO:0061418	regulation of transcription from RNA polymerase II promoter in response to hypoxia	4/172	13/18800	4.53579e-06	7.33088e-05	4.11698e-05	BACH1/HIF1A/NFE2L2/TP53	4
BP	GO:0031058	positive regulation of histone modification	8/172	103/18800	4.73725e-06	7.5899e-05	4.26244e-05	ATM/BRD4/JDP2/MAPK3/MUC1/MYB/SIRT1/TP53	8
BP	GO:1901796	regulation of signal transduction by p53 class mediator	8/172	103/18800	4.73725e-06	7.5899e-05	4.26244e-05	ATM/AURKA/CD44/HIC1/MUC1/PML/SIRT1/TP53	8
BP	GO:0072330	monocarboxylic acid biosynthetic process	11/172	215/18800	4.77991e-06	7.62509e-05	4.2822e-05	ALOX12/ALOX15/ALOX15B/ALOXE3/GPX4/PRKAA1/PTGS2/SCD/SCP2/SIRT1/TRIB3	11
BP	GO:0031056	regulation of histone modification	10/172	176/18800	5.18798e-06	8.24039e-05	4.62775e-05	ATG5/ATM/BRD4/JDP2/MAPK3/MAPK8/MUC1/MYB/SIRT1/TP53	10
BP	GO:0051384	response to glucocorticoid	9/172	139/18800	5.39257e-06	8.5286e-05	4.78961e-05	CDO1/DDIT4/FLT3/GOT1/IL6/PCK2/PIK3CA/PTGS2/ZFP36	9
BP	GO:0002534	cytokine production involved in inflammatory response	7/172	75/18800	5.58415e-06	8.66728e-05	4.86749e-05	BAP1/HIF1A/IL6/MAPK14/NOS2/STAT3/TLR4	7
BP	GO:0006809	nitric oxide biosynthetic process	7/172	75/18800	5.58415e-06	8.66728e-05	4.86749e-05	CAV1/GCH1/IFNG/NOS2/NQO1/PTGS2/TLR4	7
BP	GO:0043536	positive regulation of blood vessel endothelial cell migration	7/172	75/18800	5.58415e-06	8.66728e-05	4.86749e-05	HIF1A/HMOX1/HSPB1/NFE2L2/PTGS2/SIRT1/SP1	7
BP	GO:1900015	regulation of cytokine production involved in inflammatory response	7/172	75/18800	5.58415e-06	8.66728e-05	4.86749e-05	BAP1/HIF1A/IL6/MAPK14/NOS2/STAT3/TLR4	7
BP	GO:0010631	epithelial cell migration	14/172	358/18800	5.59786e-06	8.66728e-05	4.86749e-05	DPP4/ENPP2/FBXW7/HIF1A/HMOX1/HSPB1/IFNG/JUN/NFE2L2/PIK3CA/PTGS2/SIRT1/SP1/SRC	14
BP	GO:0003018	vascular process in circulatory system	12/172	263/18800	5.70161e-06	8.79097e-05	4.93696e-05	ABCC1/ATG5/CAV1/GCH1/GCLC/PTGS2/SLC1A5/SLC2A1/SLC2A3/SLC38A1/SLC7A5/SRC	12
BP	GO:0032006	regulation of TOR signaling	8/172	106/18800	5.87077e-06	9.01408e-05	5.06225e-05	ARNTL/ATM/DDIT4/HIF1A/PIK3CA/PRKAA1/SESN2/SIRT1	8
BP	GO:0010575	positive regulation of vascular endothelial growth factor production	5/172	29/18800	6.01106e-06	9.11554e-05	5.11923e-05	ATF4/HIF1A/IL6/NOX1/PTGS2	5
BP	GO:0031571	mitotic G1 DNA damage checkpoint signaling	5/172	29/18800	6.01106e-06	9.11554e-05	5.11923e-05	ATM/CDKN1A/MUC1/PML/TP53	5
BP	GO:0042759	long-chain fatty acid biosynthetic process	5/172	29/18800	6.01106e-06	9.11554e-05	5.11923e-05	ALOX12/ALOX15/ALOX15B/ALOXE3/GPX4	5
BP	GO:0090132	epithelium migration	14/172	361/18800	6.15755e-06	9.29942e-05	5.2225e-05	DPP4/ENPP2/FBXW7/HIF1A/HMOX1/HSPB1/IFNG/JUN/NFE2L2/PIK3CA/PTGS2/SIRT1/SP1/SRC	14
BP	GO:0045598	regulation of fat cell differentiation	9/172	142/18800	6.4206e-06	9.6571e-05	5.42337e-05	ARNTL/DDIT3/IL6/JDP2/MAPK14/PTGS2/SIRT1/TRIB3/ZFP36	9
BP	GO:1901987	regulation of cell cycle phase transition	15/172	415/18800	6.64687e-06	9.9568e-05	5.59168e-05	ATM/AURKA/BID/BRD4/CDKN1A/DUSP1/EIF2AK4/FANCD2/FBXW7/MAPK14/MUC1/PML/RB1/RRM2/TP53	15
BP	GO:2000060	positive regulation of ubiquitin-dependent protein catabolic process	8/172	108/18800	6.74747e-06	0.000100666	5.65333e-05	AURKA/CAV1/FBXW7/GCLC/KEAP1/MAPK9/NFE2L2/TRIB3	8
BP	GO:0044819	mitotic G1/S transition checkpoint signaling	5/172	30/18800	7.16008e-06	0.000106149	5.96129e-05	ATM/CDKN1A/MUC1/PML/TP53	5
BP	GO:0051098	regulation of binding	14/172	366/18800	7.20145e-06	0.000106149	5.96129e-05	AURKA/CAV1/CDKN1A/DDIT3/FBXW7/HMOX1/HSF1/IFNG/JUN/MAPK3/MAPK8/RB1/SRC/TRIB3	14
BP	GO:0090130	tissue migration	14/172	366/18800	7.20145e-06	0.000106149	5.96129e-05	DPP4/ENPP2/FBXW7/HIF1A/HMOX1/HSPB1/IFNG/JUN/NFE2L2/PIK3CA/PTGS2/SIRT1/SP1/SRC	14
BP	GO:0000082	G1/S transition of mitotic cell cycle	11/172	225/18800	7.37154e-06	0.000108224	6.07777e-05	ACVR1B/ATM/BACH1/BID/BRD4/CDKN1A/MUC1/PML/RB1/RRM2/TP53	11
BP	GO:0007178	transmembrane receptor protein serine/threonine kinase signaling pathway	14/172	368/18800	7.66115e-06	0.000111304	6.25077e-05	ACVR1B/CAV1/GDF15/HNF4A/HSPA5/JUN/MAPK14/MAPK3/PML/SIRT1/SRC/STAT3/TF/TP53	14
BP	GO:0006636	unsaturated fatty acid biosynthetic process	6/172	52/18800	7.71985e-06	0.000111304	6.25077e-05	ALOX12/ALOX15/ALOX15B/PTGS2/SCD/SIRT1	6
BP	GO:0043525	positive regulation of neuron apoptotic process	6/172	52/18800	7.71985e-06	0.000111304	6.25077e-05	ATF4/ATM/DDIT3/FBXW7/NQO1/TP53	6
BP	GO:0032611	interleukin-1 beta production	8/172	110/18800	7.73239e-06	0.000111304	6.25077e-05	HSPB1/IFNG/IL6/PANX1/PML/STAT3/TLR4/TNFAIP3	8
BP	GO:0032651	regulation of interleukin-1 beta production	8/172	110/18800	7.73239e-06	0.000111304	6.25077e-05	HSPB1/IFNG/IL6/PANX1/PML/STAT3/TLR4/TNFAIP3	8
BP	GO:0048708	astrocyte differentiation	7/172	79/18800	7.90907e-06	0.000112965	6.34403e-05	IFNG/IL6/KRAS/MAPK1/MAPK3/STAT3/TLR4	7
BP	GO:0072332	intrinsic apoptotic signaling pathway by p53 class mediator	7/172	79/18800	7.90907e-06	0.000112965	6.34403e-05	CD44/CDKN1A/DDIT4/MUC1/PML/SIRT1/TP53	7
BP	GO:1903706	regulation of hemopoiesis	14/172	371/18800	8.39955e-06	0.000119268	6.69802e-05	ACVR1B/FANCD2/FBXW7/HIF1A/HSF1/IFNG/MAPK14/MYB/RB1/RIPK1/SOCS1/STAT3/TLR4/ZFP36	14
BP	GO:0015980	energy derivation by oxidation of organic compounds	13/172	321/18800	8.41511e-06	0.000119268	6.69802e-05	ACO1/BID/BNIP3/CISD1/CS/FH/HIF1A/IFNG/ISCU/NOS2/PHKG2/PIK3CA/TP53	13
BP	GO:0030308	negative regulation of cell growth	10/172	186/18800	8.45593e-06	0.000119387	6.70472e-05	ACVR1B/CDKN1A/HNF4A/PML/RB1/RGS4/SESN2/SIRT1/TP53/ULK2	10
BP	GO:0007346	regulation of mitotic cell cycle	16/172	478/18800	8.52999e-06	0.000119973	6.73763e-05	ASNS/ATM/AURKA/BID/BRD4/CDKN1A/DUSP1/FANCD2/HSF1/MUC1/PML/RB1/RRM2/SIRT1/TP53/YWHAE	16
BP	GO:0002931	response to ischemia	6/172	53/18800	8.63981e-06	0.000121056	6.79843e-05	CAV1/MAP3K5/NQO1/PANX1/SQSTM1/TP53	6
BP	GO:0018108	peptidyl-tyrosine phosphorylation	14/172	373/18800	8.92622e-06	0.000124515	6.99271e-05	CAV1/CD44/CHMP6/ENPP2/FBXW7/FLT3/HSF1/IFNG/IL6/MAPK3/NF2/SOCS1/SRC/TP53	14
BP	GO:0001667	ameboidal-type cell migration	16/172	480/18800	8.98587e-06	0.000124515	6.99271e-05	ACVR1B/DPP4/ENPP2/FBXW7/HIF1A/HMOX1/HSPB1/IFNG/JUN/NFE2L2/PIK3CA/PML/PTGS2/SIRT1/SP1/SRC	16
BP	GO:0010821	regulation of mitochondrion organization	9/172	148/18800	8.98809e-06	0.000124515	6.99271e-05	AURKA/BID/BNIP3/FBXW7/GCLC/HIF1A/MAPK8/SQSTM1/TP53	9
BP	GO:0046209	nitric oxide metabolic process	7/172	81/18800	9.34302e-06	0.000128948	7.24163e-05	CAV1/GCH1/IFNG/NOS2/NQO1/PTGS2/TLR4	7
BP	GO:1904659	glucose transmembrane transport	8/172	113/18800	9.43599e-06	0.000129517	7.27362e-05	MAPK14/NFE2L2/SESN2/SLC2A1/SLC2A3/SLC2A6/SLC2A8/TRIB3	8
BP	GO:0045333	cellular respiration	11/172	231/18800	9.4546e-06	0.000129517	7.27362e-05	ACO1/BID/BNIP3/CISD1/CS/FH/HIF1A/IFNG/ISCU/NOS2/PIK3CA	11
BP	GO:0018212	peptidyl-tyrosine modification	14/172	376/18800	9.77118e-06	0.000133358	7.48933e-05	CAV1/CD44/CHMP6/ENPP2/FBXW7/FLT3/HSF1/IFNG/IL6/MAPK3/NF2/SOCS1/SRC/TP53	14
BP	GO:0043200	response to amino acid	8/172	114/18800	1.00699e-05	0.000136832	7.68438e-05	CDO1/CYBB/GCLC/HSF1/NQO1/PIK3CA/SESN2/SOCS1	8
BP	GO:1901983	regulation of protein acetylation	7/172	82/18800	1.0137e-05	0.000136832	7.68438e-05	ARNTL/ATG5/MAPK3/MUC1/PML/PRKAA1/SIRT1	7
BP	GO:2001057	reactive nitrogen species metabolic process	7/172	82/18800	1.0137e-05	0.000136832	7.68438e-05	CAV1/GCH1/IFNG/NOS2/NQO1/PTGS2/TLR4	7
BP	GO:0000077	DNA damage checkpoint signaling	8/172	115/18800	1.07393e-05	0.000144001	8.08699e-05	ATM/CDKN1A/EIF2AK4/FANCD2/MAPK14/MUC1/PML/TP53	8
BP	GO:0097352	autophagosome maturation	6/172	55/18800	1.07463e-05	0.000144001	8.08699e-05	ATG5/BECN1/CHMP5/CHMP6/LAMP2/MAP1LC3A	6
BP	GO:0042509	regulation of tyrosine phosphorylation of STAT protein	7/172	83/18800	1.09862e-05	0.000146682	8.23755e-05	CAV1/FLT3/HSF1/IFNG/IL6/NF2/SOCS1	7
BP	GO:0016052	carbohydrate catabolic process	9/172	152/18800	1.11495e-05	0.000148324	8.3298e-05	DDIT4/HIF1A/IFNG/PGD/PHKG2/PRKAA1/SLC2A6/STAT3/TP53	9
BP	GO:0018410	C-terminal protein amino acid modification	4/172	16/18800	1.13004e-05	0.000149791	8.41218e-05	ATG16L1/ATG5/ATG7/WIPI2	4
BP	GO:1901800	positive regulation of proteasomal protein catabolic process	8/172	116/18800	1.14459e-05	0.000151176	8.48997e-05	AURKA/CAV1/FBXW7/GCLC/KEAP1/MAPK9/NFE2L2/TRIB3	8
BP	GO:0033673	negative regulation of kinase activity	11/172	236/18800	1.15647e-05	0.000152041	8.53852e-05	CAV1/CDKN1A/CHMP6/DUSP1/HSPB1/IFNG/NF2/RB1/SIRT1/TNFAIP3/TRIB3	11
BP	GO:0010661	positive regulation of muscle cell apoptotic process	5/172	33/18800	1.1663e-05	0.000152041	8.53852e-05	ATF4/BNIP3/IFNG/MAP3K5/TP53	5
BP	GO:0046685	response to arsenic-containing substance	5/172	33/18800	1.1663e-05	0.000152041	8.53852e-05	ATF3/ATF4/GCLC/HMOX1/HSF1	5
BP	GO:0050878	regulation of body fluid levels	14/172	382/18800	1.16764e-05	0.000152041	8.53852e-05	ALOX12/ALOXE3/ATG5/CAV1/CDO1/HIF1A/HNF4A/HSPB1/IL6/MAPK14/NFE2L2/PIK3CA/SRC/TLR4	14
BP	GO:0032386	regulation of intracellular transport	13/172	332/18800	1.20552e-05	0.00015642	8.78446e-05	BAP1/FBXW7/HRAS/IFNG/MAPK1/MAPK14/MAPK3/MAPK8/PRKAA1/PTGS2/SCP2/SRC/YWHAE	13
BP	GO:0008645	hexose transmembrane transport	8/172	117/18800	1.21913e-05	0.000157631	8.85246e-05	MAPK14/NFE2L2/SESN2/SLC2A1/SLC2A3/SLC2A6/SLC2A8/TRIB3	8
BP	GO:0046395	carboxylic acid catabolic process	11/172	238/18800	1.25169e-05	0.000160714	9.02561e-05	CBS/CDO1/GLS2/GOT1/GPT2/LPIN1/NOS2/PCK2/PGD/SCP2/SESN2	11
BP	GO:0098657	import into cell	11/172	238/18800	1.25169e-05	0.000160714	9.02561e-05	ACSL3/DRD4/IFNG/ISCU/RGS4/SLC1A5/SLC2A1/SLC2A3/SLC38A1/SLC7A5/TFR2	11
BP	GO:0044089	positive regulation of cellular component biogenesis	16/172	494/18800	1.28354e-05	0.000164231	9.22309e-05	ALOX15/ATM/BECN1/BID/CAV1/HRAS/HSF1/IFNG/MAPK9/NF2/PIK3CA/SNX4/SRC/TLR4/TP53/WIPI1	16
BP	GO:0045786	negative regulation of cell cycle	14/172	387/18800	1.35079e-05	0.000172238	9.67278e-05	ALOX15B/ATM/CDKN1A/DUSP1/EIF2AK4/FANCD2/MAPK14/MUC1/PML/PTGS2/RB1/SIRT1/TNFAIP3/TP53	14
BP	GO:0090316	positive regulation of intracellular protein transport	9/172	156/18800	1.37399e-05	0.000174592	9.80498e-05	BAP1/FBXW7/HRAS/IFNG/MAPK14/MAPK8/PRKAA1/PTGS2/YWHAE	9
BP	GO:0015749	monosaccharide transmembrane transport	8/172	119/18800	1.38052e-05	0.000174818	9.81766e-05	MAPK14/NFE2L2/SESN2/SLC2A1/SLC2A3/SLC2A6/SLC2A8/TRIB3	8
BP	GO:1900542	regulation of purine nucleotide metabolic process	7/172	86/18800	1.38947e-05	0.000175349	9.84749e-05	DDIT4/HIF1A/IFNG/NOS2/PRKAA1/SLC2A6/STAT3	7
BP	GO:0050673	epithelial cell proliferation	15/172	443/18800	1.44191e-05	0.000180222	0.000101212	CAV1/FBXW7/HIF1A/HMOX1/HRAS/IL6/JUN/MAPK1/NRAS/RB1/SIRT1/SP1/STAT3/TNFAIP3/ZFP36	15
BP	GO:1903364	positive regulation of cellular protein catabolic process	9/172	157/18800	1.44624e-05	0.000180222	0.000101212	AURKA/CAV1/FBXW7/GCLC/KEAP1/MAPK9/NFE2L2/TNFAIP3/TRIB3	9
BP	GO:0032388	positive regulation of intracellular transport	10/172	198/18800	1.46034e-05	0.000180222	0.000101212	BAP1/FBXW7/HRAS/IFNG/MAPK14/MAPK8/PRKAA1/PTGS2/SCP2/YWHAE	10
BP	GO:0016054	organic acid catabolic process	11/172	242/18800	1.46278e-05	0.000180222	0.000101212	CBS/CDO1/GLS2/GOT1/GPT2/LPIN1/NOS2/PCK2/PGD/SCP2/SESN2	11
BP	GO:0019318	hexose metabolic process	11/172	242/18800	1.46278e-05	0.000180222	0.000101212	ATF3/ATF4/MAPK14/PCK2/PHKG2/PIK3CA/PRKAA1/SESN2/SIRT1/SRC/TP53	11
BP	GO:0019369	arachidonic acid metabolic process	6/172	58/18800	1.46678e-05	0.000180222	0.000101212	ALOX12/ALOX15/ALOX15B/ALOXE3/GPX4/PTGS2	6
BP	GO:0034497	protein localization to phagophore assembly site	4/172	17/18800	1.46721e-05	0.000180222	0.000101212	ATG16L1/ATG4D/WIPI1/WIPI2	4
BP	GO:1900034	regulation of cellular response to heat	4/172	17/18800	1.46721e-05	0.000180222	0.000101212	ATM/DNAJB6/HSF1/SIRT1	4
BP	GO:0007260	tyrosine phosphorylation of STAT protein	7/172	87/18800	1.49951e-05	0.000183578	0.000103097	CAV1/FLT3/HSF1/IFNG/IL6/NF2/SOCS1	7
BP	GO:1901617	organic hydroxy compound biosynthetic process	11/172	243/18800	1.52014e-05	0.000184888	0.000103832	ALOX12/ALOX15/ALOX15B/GCH1/GOT1/IFNG/PCK2/PRKAA1/PSAT1/SCP2/SIRT1	11
BP	GO:0010632	regulation of epithelial cell migration	12/172	290/18800	1.52527e-05	0.000184888	0.000103832	ENPP2/FBXW7/HIF1A/HMOX1/HSPB1/IFNG/JUN/NFE2L2/PTGS2/SIRT1/SP1/SRC	12
BP	GO:0051607	defense response to virus	12/172	290/18800	1.52527e-05	0.000184888	0.000103832	ATG16L1/ATG5/ATG7/BECN1/BNIP3/DDIT4/EIF2AK4/IFNG/IL6/PML/RELA/TNFAIP3	12
BP	GO:0006690	icosanoid metabolic process	8/172	121/18800	1.55952e-05	0.000188421	0.000105816	ABCC1/ALOX12/ALOX15/ALOX15B/ALOXE3/GPX4/PTGS2/SIRT1	8
BP	GO:0140546	defense response to symbiont	12/172	291/18800	1.57838e-05	0.000190077	0.000106746	ATG16L1/ATG5/ATG7/BECN1/BNIP3/DDIT4/EIF2AK4/IFNG/IL6/PML/RELA/TNFAIP3	12
BP	GO:0006140	regulation of nucleotide metabolic process	7/172	88/18800	1.61667e-05	0.000193887	0.000108886	DDIT4/HIF1A/IFNG/NOS2/PRKAA1/SLC2A6/STAT3	7
BP	GO:0045599	negative regulation of fat cell differentiation	6/172	59/18800	1.62055e-05	0.000193887	0.000108886	ARNTL/DDIT3/IL6/JDP2/SIRT1/TRIB3	6
BP	GO:1902115	regulation of organelle assembly	10/172	202/18800	1.73673e-05	0.000206323	0.00011587	ATG3/ATG5/BECN1/CHMP5/CHMP6/MAPK9/PRKAA1/SNX4/SRC/WIPI1	10
BP	GO:0001776	leukocyte homeostasis	7/172	89/18800	1.74129e-05	0.000206323	0.00011587	BAP1/FLT3/HIF1A/IL6/SLC40A1/TNFAIP3/TSC22D3	7
BP	GO:1903578	regulation of ATP metabolic process	7/172	89/18800	1.74129e-05	0.000206323	0.00011587	DDIT4/HIF1A/IFNG/PRKAA1/SLC2A6/STAT3/TP53	7
BP	GO:0031570	DNA integrity checkpoint signaling	8/172	123/18800	1.75766e-05	0.000207595	0.000116584	ATM/CDKN1A/EIF2AK4/FANCD2/MAPK14/MUC1/PML/TP53	8
BP	GO:0090311	regulation of protein deacetylation	6/172	60/18800	1.78706e-05	0.000210394	0.000118156	IFNG/JDP2/MAPK8/PRKAA1/SIRT1/TP53	6
BP	GO:0045765	regulation of angiogenesis	13/172	345/18800	1.8089e-05	0.000211968	0.00011904	CYBB/ENPP2/HIF1A/HMOX1/HSPB1/IL6/MTDH/NFE2L2/PML/SIRT1/SP1/STAT3/TNFAIP3	13
BP	GO:0043516	regulation of DNA damage response, signal transduction by p53 class mediator	5/172	36/18800	1.81194e-05	0.000211968	0.00011904	ATM/CD44/HIC1/SIRT1/TP53	5
BP	GO:0036499	PERK-mediated unfolded protein response	4/172	18/18800	1.87297e-05	0.000218414	0.00012266	ATF4/DDIT3/HSPA5/NFE2L2	4
BP	GO:0051100	negative regulation of binding	9/172	165/18800	2.15e-05	0.000248799	0.000139724	AURKA/CAV1/CDKN1A/DDIT3/FBXW7/HMOX1/JUN/MAPK3/MAPK8	9
BP	GO:0031663	lipopolysaccharide-mediated signaling pathway	6/172	62/18800	2.16149e-05	0.000248799	0.000139724	MAPK1/MAPK14/MAPK3/MTDH/TLR4/TNFAIP3	6
BP	GO:0032731	positive regulation of interleukin-1 beta production	6/172	62/18800	2.16149e-05	0.000248799	0.000139724	HSPB1/IFNG/IL6/PANX1/STAT3/TLR4	6
BP	GO:0032436	positive regulation of proteasomal ubiquitin-dependent protein catabolic process	7/172	92/18800	2.16366e-05	0.000248799	0.000139724	AURKA/CAV1/GCLC/KEAP1/MAPK9/NFE2L2/TRIB3	7
BP	GO:1901342	regulation of vasculature development	13/172	351/18800	2.16729e-05	0.000248799	0.000139724	CYBB/ENPP2/HIF1A/HMOX1/HSPB1/IL6/MTDH/NFE2L2/PML/SIRT1/SP1/STAT3/TNFAIP3	13
BP	GO:2000058	regulation of ubiquitin-dependent protein catabolic process	9/172	166/18800	2.25561e-05	0.000258135	0.000144967	AURKA/CAV1/FBXW7/GCLC/KEAP1/MAPK9/NFE2L2/PML/TRIB3	9
BP	GO:1901215	negative regulation of neuron death	10/172	209/18800	2.3293e-05	0.000265742	0.000149239	ATF4/GCLC/HIF1A/HMOX1/HRAS/HSF1/JUN/KRAS/PIK3CA/SIRT1	10
BP	GO:0031929	TOR signaling	8/172	128/18800	2.34748e-05	0.00026699	0.00014994	ARNTL/ATM/DDIT4/HIF1A/PIK3CA/PRKAA1/SESN2/SIRT1	8
BP	GO:0055093	response to hyperoxia	4/172	19/18800	2.35552e-05	0.00026708	0.000149991	ATG7/BNIP3/CAV1/NOX1	4
BP	GO:0071466	cellular response to xenobiotic stimulus	9/172	168/18800	2.48012e-05	0.000278007	0.000156127	HNF4A/HSF1/HSPA5/NFE2L2/NOS2/NQO1/PRKAA1/RB1/TP53	9
BP	GO:0001101	response to acid chemical	8/172	129/18800	2.48341e-05	0.000278007	0.000156127	CDO1/CYBB/GCLC/HSF1/NQO1/PIK3CA/SESN2/SOCS1	8
BP	GO:0032612	interleukin-1 production	8/172	129/18800	2.48341e-05	0.000278007	0.000156127	HSPB1/IFNG/IL6/PANX1/PML/STAT3/TLR4/TNFAIP3	8
BP	GO:0032652	regulation of interleukin-1 production	8/172	129/18800	2.48341e-05	0.000278007	0.000156127	HSPB1/IFNG/IL6/PANX1/PML/STAT3/TLR4/TNFAIP3	8
BP	GO:1904035	regulation of epithelial cell apoptotic process	7/172	94/18800	2.48961e-05	0.000278007	0.000156127	HMOX1/IL6/NFE2L2/PRKAA1/RB1/TNFAIP3/ZFP36	7
BP	GO:1903362	regulation of cellular protein catabolic process	11/172	258/18800	2.64685e-05	0.000294672	0.000165486	AURKA/CAV1/FBXW7/GABARAPL2/GCLC/KEAP1/MAPK9/NFE2L2/PML/TNFAIP3/TRIB3	11
BP	GO:0000075	cell cycle checkpoint signaling	9/172	170/18800	2.72332e-05	0.000302272	0.000169754	ATM/CDKN1A/DUSP1/EIF2AK4/FANCD2/MAPK14/MUC1/PML/TP53	9
BP	GO:0031396	regulation of protein ubiquitination	10/172	213/18800	2.74014e-05	0.000303226	0.00017029	ARRDC3/ATG5/CAV1/FBXW7/GCLC/HSPA5/MAPK9/SQSTM1/TNFAIP3/TRIB3	10
BP	GO:0034219	carbohydrate transmembrane transport	8/172	131/18800	2.77512e-05	0.000306177	0.000171947	MAPK14/NFE2L2/SESN2/SLC2A1/SLC2A3/SLC2A6/SLC2A8/TRIB3	8
BP	GO:0014823	response to activity	6/172	65/18800	2.83921e-05	0.000312313	0.000175393	GCLC/HIF1A/HSF1/IL6/PIK3CA/PRKAA1	6
BP	GO:0032495	response to muramyl dipeptide	4/172	20/18800	2.92343e-05	0.000317783	0.000178465	CHMP5/MAPK14/RELA/TNFAIP3	4
BP	GO:0043651	linoleic acid metabolic process	4/172	20/18800	2.92343e-05	0.000317783	0.000178465	ALOX12/ALOX15/ALOX15B/ALOXE3	4
BP	GO:1902176	negative regulation of oxidative stress-induced intrinsic apoptotic signaling pathway	4/172	20/18800	2.92343e-05	0.000317783	0.000178465	HIF1A/HSPB1/NFE2L2/SIRT1	4
BP	GO:1903209	positive regulation of oxidative stress-induced cell death	4/172	20/18800	2.92343e-05	0.000317783	0.000178465	FBXW7/NOX1/RIPK1/TLR4	4
BP	GO:0009416	response to light stimulus	12/172	310/18800	2.94468e-05	0.000319151	0.000179234	ATF4/CDKN1A/EIF2AK4/HIF1A/KRAS/MAPK8/PML/PRKAA1/PTGS2/RELA/SIRT1/TP53	12
BP	GO:0097009	energy homeostasis	5/172	40/18800	3.07047e-05	0.000331809	0.000186342	PIK3CA/PRKAA1/SIRT1/SQSTM1/STAT3	5
BP	GO:1903052	positive regulation of proteolysis involved in cellular protein catabolic process	8/172	134/18800	3.26617e-05	0.000351404	0.000197346	AURKA/CAV1/FBXW7/GCLC/KEAP1/MAPK9/NFE2L2/TRIB3	8
BP	GO:0048771	tissue remodeling	9/172	174/18800	3.27087e-05	0.000351404	0.000197346	ATG5/CAV1/EPAS1/HIF1A/IL6/SRC/TF/TNFAIP3/TP53	9
BP	GO:0031330	negative regulation of cellular catabolic process	11/172	265/18800	3.38261e-05	0.000362352	0.000203495	ATG7/BECN1/ELAVL1/GABARAPL2/HMOX1/MAPK14/PIK3CA/PML/STAT3/TP53/ZFP36	11
BP	GO:0009299	mRNA transcription	5/172	41/18800	3.47119e-05	0.000368626	0.000207018	ATF4/EPAS1/HSF1/STAT3/TP53	5
BP	GO:0033574	response to testosterone	5/172	41/18800	3.47119e-05	0.000368626	0.000207018	CA9/HSF1/NCOA4/NQO1/SIRT1	5
BP	GO:0046688	response to copper ion	5/172	41/18800	3.47119e-05	0.000368626	0.000207018	BECN1/HSF1/MAP1LC3A/MT1G/NFE2L2	5
BP	GO:0071243	cellular response to arsenic-containing substance	4/172	21/18800	3.58558e-05	0.00037968	0.000213226	ATF3/ATF4/HMOX1/HSF1	4
BP	GO:2000756	regulation of peptidyl-lysine acetylation	6/172	68/18800	3.6781e-05	0.000388361	0.000218101	ATG5/MAPK3/MUC1/PML/PRKAA1/SIRT1	6
BP	GO:0090276	regulation of peptide hormone secretion	9/172	177/18800	3.74034e-05	0.000393791	0.000221151	ACSL4/ARNTL/HIF1A/HNF4A/IFNG/IL6/NOS2/PCK2/TFR2	9
BP	GO:0007596	blood coagulation	10/172	221/18800	3.7509e-05	0.000393791	0.000221151	ALOX12/CAV1/HNF4A/HSPB1/IL6/MAPK14/NFE2L2/PIK3CA/SRC/TLR4	10
BP	GO:0071354	cellular response to interleukin-6	5/172	42/18800	3.91127e-05	0.000409461	0.000229951	IL6/RELA/RIPK1/SRC/STAT3	5
BP	GO:1903050	regulation of proteolysis involved in cellular protein catabolic process	10/172	223/18800	4.04839e-05	0.000422615	0.000237338	AURKA/CAV1/FBXW7/GABARAPL2/GCLC/KEAP1/MAPK9/NFE2L2/PML/TRIB3	10
BP	GO:0032677	regulation of interleukin-8 production	7/172	102/18800	4.22487e-05	0.000439792	0.000246985	DDIT3/IL6/NOS2/RELA/RIPK1/STAT3/TLR4	7
BP	GO:0002791	regulation of peptide secretion	9/172	180/18800	4.26565e-05	0.000442787	0.000248666	ACSL4/ARNTL/HIF1A/HNF4A/IFNG/IL6/NOS2/PCK2/TFR2	9
BP	GO:0032722	positive regulation of chemokine production	6/172	70/18800	4.34009e-05	0.000449135	0.000252231	ALOX15B/HIF1A/HMOX1/IFNG/IL6/TLR4	6
BP	GO:0035357	peroxisome proliferator activated receptor signaling pathway	4/172	22/18800	4.35118e-05	0.000449135	0.000252231	ALOX15/ALOX15B/ALOXE3/SIRT1	4
BP	GO:0042554	superoxide anion generation	5/172	43/18800	4.39335e-05	0.000452221	0.000253965	ALOX12/CYBB/DUOX1/NCF2/NOX1	5
BP	GO:0032637	interleukin-8 production	7/172	103/18800	4.49839e-05	0.00046046	0.000258592	DDIT3/IL6/NOS2/RELA/RIPK1/STAT3/TLR4	7
BP	GO:0032760	positive regulation of tumor necrosis factor production	7/172	103/18800	4.49839e-05	0.00046046	0.000258592	CYBB/HSPB1/IFNG/IL6/RIPK1/STAT3/TLR4	7
BP	GO:0009743	response to carbohydrate	10/172	226/18800	4.53235e-05	0.000461373	0.000259104	GCLC/HIF1A/HNF4A/NQO1/PCK2/PIK3CA/PRKAA1/PTGS2/SESN2/TXNIP	10
BP	GO:0050817	coagulation	10/172	226/18800	4.53235e-05	0.000461373	0.000259104	ALOX12/CAV1/HNF4A/HSPB1/IL6/MAPK14/NFE2L2/PIK3CA/SRC/TLR4	10
BP	GO:0032640	tumor necrosis factor production	9/172	182/18800	4.64945e-05	0.000470693	0.000264338	CYBB/HSPB1/IFNG/IL6/RIPK1/STAT3/TLR4/TNFAIP3/ZFP36	9
BP	GO:0032680	regulation of tumor necrosis factor production	9/172	182/18800	4.64945e-05	0.000470693	0.000264338	CYBB/HSPB1/IFNG/IL6/RIPK1/STAT3/TLR4/TNFAIP3/ZFP36	9
BP	GO:0007599	hemostasis	10/172	227/18800	4.70427e-05	0.000473724	0.00026604	ALOX12/CAV1/HNF4A/HSPB1/IL6/MAPK14/NFE2L2/PIK3CA/SRC/TLR4	10
BP	GO:2000379	positive regulation of reactive oxygen species metabolic process	6/172	71/18800	4.7051e-05	0.000473724	0.00026604	CDKN1A/MAPK14/NFE2L2/RIPK1/TLR4/TP53	6
BP	GO:0043410	positive regulation of MAPK cascade	15/172	491/18800	4.72712e-05	0.000474644	0.000266557	ALOX15/CD44/DRD4/FBXW7/FLT3/GDF15/HRAS/IL6/JUN/MAP3K5/MAPK3/NOX1/RIPK1/SRC/TLR4	15
BP	GO:0043405	regulation of MAP kinase activity	9/172	183/18800	4.85204e-05	0.000481934	0.000270651	CAV1/DRD4/DUSP1/FLT3/HRAS/MAP3K5/SRC/TLR4/TRIB3	9
BP	GO:0045766	positive regulation of angiogenesis	9/172	183/18800	4.85204e-05	0.000481934	0.000270651	CYBB/HIF1A/HMOX1/HSPB1/MTDH/NFE2L2/SIRT1/SP1/STAT3	9
BP	GO:0090087	regulation of peptide transport	9/172	183/18800	4.85204e-05	0.000481934	0.000270651	ACSL4/ARNTL/HIF1A/HNF4A/IFNG/IL6/NOS2/PCK2/TFR2	9
BP	GO:1904018	positive regulation of vasculature development	9/172	183/18800	4.85204e-05	0.000481934	0.000270651	CYBB/HIF1A/HMOX1/HSPB1/MTDH/NFE2L2/SIRT1/SP1/STAT3	9
BP	GO:0050678	regulation of epithelial cell proliferation	13/172	382/18800	5.19455e-05	0.000514568	0.000288978	CAV1/FBXW7/HIF1A/HMOX1/HRAS/JUN/NRAS/RB1/SIRT1/SP1/STAT3/TNFAIP3/ZFP36	13
BP	GO:0019430	removal of superoxide radicals	4/172	23/18800	5.22974e-05	0.000516664	0.000290156	GCH1/NFE2L2/NQO1/PRDX1	4
BP	GO:0006090	pyruvate metabolic process	7/172	106/18800	5.4074e-05	0.000532788	0.00029921	DDIT4/HIF1A/IFNG/PCK2/PRKAA1/SLC2A6/STAT3	7
BP	GO:0046883	regulation of hormone secretion	10/172	231/18800	5.44879e-05	0.000532807	0.000299221	ACSL4/ARNTL/HIF1A/HNF4A/IFNG/IL6/NOS2/PCK2/SNX4/TFR2	10
BP	GO:0033135	regulation of peptidyl-serine phosphorylation	8/172	144/18800	5.45861e-05	0.000532807	0.000299221	CAV1/CD44/DDIT4/IFNG/IL6/PIK3CA/PRKAA1/PTGS2	8
BP	GO:0032620	interleukin-17 production	5/172	45/18800	5.49446e-05	0.000532807	0.000299221	DDIT3/IFNG/IL6/SLC7A5/TLR4	5
BP	GO:0032660	regulation of interleukin-17 production	5/172	45/18800	5.49446e-05	0.000532807	0.000299221	DDIT3/IFNG/IL6/SLC7A5/TLR4	5
BP	GO:0051180	vitamin transport	5/172	45/18800	5.49446e-05	0.000532807	0.000299221	ABCC1/SLC2A1/SLC2A3/SLC2A6/SLC2A8	5
BP	GO:1902895	positive regulation of miRNA transcription	5/172	45/18800	5.49446e-05	0.000532807	0.000299221	HIF1A/JUN/RELA/STAT3/TP53	5
BP	GO:0032732	positive regulation of interleukin-1 production	6/172	73/18800	5.5088e-05	0.000532807	0.000299221	HSPB1/IFNG/IL6/PANX1/STAT3/TLR4	6
BP	GO:0051235	maintenance of location	12/172	331/18800	5.55692e-05	0.000536054	0.000301045	ALB/ATG5/CAV1/DDIT3/FBXW7/FTH1/FTL/HSPA5/IL6/KEAP1/PML/SIRT1	12
BP	GO:0071706	tumor necrosis factor superfamily cytokine production	9/172	187/18800	5.73864e-05	0.000549576	0.000308639	CYBB/HSPB1/IFNG/IL6/RIPK1/STAT3/TLR4/TNFAIP3/ZFP36	9
BP	GO:1903555	regulation of tumor necrosis factor superfamily cytokine production	9/172	187/18800	5.73864e-05	0.000549576	0.000308639	CYBB/HSPB1/IFNG/IL6/RIPK1/STAT3/TLR4/TNFAIP3/ZFP36	9
BP	GO:1903557	positive regulation of tumor necrosis factor superfamily cytokine production	7/172	107/18800	5.74184e-05	0.000549576	0.000308639	CYBB/HSPB1/IFNG/IL6/RIPK1/STAT3/TLR4	7
BP	GO:0035924	cellular response to vascular endothelial growth factor stimulus	6/172	74/18800	5.94985e-05	0.000568011	0.000318991	FLT3/HSPB1/MAPK14/MT1G/PIK3CA/RELA	6
BP	GO:1902806	regulation of cell cycle G1/S phase transition	9/172	188/18800	5.98047e-05	0.000569458	0.000319804	ATM/BID/CDKN1A/FBXW7/MUC1/PML/RB1/RRM2/TP53	9
BP	GO:0062013	positive regulation of small molecule metabolic process	8/172	146/18800	6.01859e-05	0.000571611	0.000321013	HIF1A/IFNG/NOS2/PHKG2/PRKAA1/PTGS2/SIRT1/SRC	8
BP	GO:0010665	regulation of cardiac muscle cell apoptotic process	5/172	46/18800	6.11919e-05	0.000576706	0.000323875	BNIP3/HSF1/MAP3K5/NFE2L2/TP53	5
BP	GO:0035794	positive regulation of mitochondrial membrane permeability	5/172	46/18800	6.11919e-05	0.000576706	0.000323875	BID/BNIP3/GCLC/MAPK8/TP53	5
BP	GO:0070741	response to interleukin-6	5/172	46/18800	6.11919e-05	0.000576706	0.000323875	IL6/RELA/RIPK1/SRC/STAT3	5
BP	GO:0035994	response to muscle stretch	4/172	24/18800	6.23103e-05	0.000585749	0.000328953	JUN/MAPK14/PIK3CA/RELA	4
BP	GO:0050796	regulation of insulin secretion	8/172	147/18800	6.31602e-05	0.000592227	0.000332591	ACSL4/ARNTL/HIF1A/HNF4A/IFNG/IL6/NOS2/PCK2	8
BP	GO:0010822	positive regulation of mitochondrion organization	6/172	75/18800	6.41867e-05	0.000600325	0.000337139	AURKA/BID/BNIP3/HIF1A/MAPK8/TP53	6
BP	GO:0050731	positive regulation of peptidyl-tyrosine phosphorylation	9/172	190/18800	6.48998e-05	0.000603929	0.000339163	CD44/ENPP2/FBXW7/FLT3/HSF1/IFNG/IL6/SRC/TP53	9
BP	GO:0061136	regulation of proteasomal protein catabolic process	9/172	190/18800	6.48998e-05	0.000603929	0.000339163	AURKA/CAV1/FBXW7/GABARAPL2/GCLC/KEAP1/MAPK9/NFE2L2/TRIB3	9
BP	GO:0006520	cellular amino acid metabolic process	11/172	285/18800	6.53333e-05	0.000606431	0.000340568	ASNS/ATF4/CBS/CDO1/GCLC/GLS2/GOT1/GPT2/HNF4A/NOS2/PSAT1	11
BP	GO:0045646	regulation of erythrocyte differentiation	5/172	47/18800	6.79733e-05	0.000627773	0.000352554	ACVR1B/HIF1A/MAPK14/STAT3/ZFP36	5
BP	GO:2000378	negative regulation of reactive oxygen species metabolic process	5/172	47/18800	6.79733e-05	0.000627773	0.000352554	ATG5/BECN1/BNIP3/HIF1A/TP53	5
BP	GO:0019216	regulation of lipid metabolic process	12/172	339/18800	6.98293e-05	0.000643302	0.000361275	ACSL3/CAV1/FBXW7/FLT3/HNF4A/IFNG/LPIN1/PRKAA1/PTGS2/SIRT1/SRC/TRIB3	12
BP	GO:0032984	protein-containing complex disassembly	10/172	239/18800	7.24273e-05	0.0006649	0.000373404	ATG5/BECN1/BNIP3/CAPG/CHMP5/CHMP6/DDIT4/LAMP2/MAP1LC3A/PIK3CA	10
BP	GO:0001938	positive regulation of endothelial cell proliferation	7/172	111/18800	7.25345e-05	0.0006649	0.000373404	HIF1A/HMOX1/JUN/NRAS/SIRT1/SP1/STAT3	7
BP	GO:0043535	regulation of blood vessel endothelial cell migration	8/172	150/18800	7.28261e-05	0.000665916	0.000373975	FBXW7/HIF1A/HMOX1/HSPB1/NFE2L2/PTGS2/SIRT1/SP1	8
BP	GO:0009746	response to hexose	9/172	193/18800	7.32254e-05	0.00066791	0.000375094	GCLC/HIF1A/HNF4A/PCK2/PIK3CA/PRKAA1/PTGS2/SESN2/TXNIP	9
BP	GO:0071450	cellular response to oxygen radical	4/172	25/18800	7.36513e-05	0.000668485	0.000375417	GCH1/NFE2L2/NQO1/PRDX1	4
BP	GO:0071451	cellular response to superoxide	4/172	25/18800	7.36513e-05	0.000668485	0.000375417	GCH1/NFE2L2/NQO1/PRDX1	4
BP	GO:0045913	positive regulation of carbohydrate metabolic process	6/172	77/18800	7.44472e-05	0.00067367	0.000378329	HIF1A/IFNG/PHKG2/PRKAA1/SIRT1/SRC	6
BP	GO:0045860	positive regulation of protein kinase activity	13/172	396/18800	7.48188e-05	0.00067367	0.000378329	CDKN1A/DRD4/FBXW7/FLT3/HRAS/IFNG/MAP3K5/PIK3CA/SIRT1/SOCS1/SRC/TLR4/VLDLR	13
BP	GO:0046486	glycerolipid metabolic process	13/172	396/18800	7.48188e-05	0.00067367	0.000378329	ACSL3/ALOX15/ATM/BECN1/CAV1/ENPP2/FBXW7/LPIN1/PCK2/PIK3CA/PRDX6/SIRT1/SOCS1	13
BP	GO:0010662	regulation of striated muscle cell apoptotic process	5/172	48/18800	7.53194e-05	0.00067367	0.000378329	BNIP3/HSF1/MAP3K5/NFE2L2/TP53	5
BP	GO:1901985	positive regulation of protein acetylation	5/172	48/18800	7.53194e-05	0.00067367	0.000378329	ARNTL/MAPK3/MUC1/PML/PRKAA1	5
BP	GO:1902108	regulation of mitochondrial membrane permeability involved in apoptotic process	5/172	48/18800	7.53194e-05	0.00067367	0.000378329	BID/BNIP3/GCLC/MAPK8/TP53	5
BP	GO:0009914	hormone transport	11/172	290/18800	7.63233e-05	0.000680996	0.000382443	ACSL4/ARNTL/HIF1A/HNF4A/IFNG/IL6/NOS2/PCK2/SLC7A5/SNX4/TFR2	11
BP	GO:0009185	ribonucleoside diphosphate metabolic process	7/172	112/18800	7.67811e-05	0.000681779	0.000382883	DDIT4/HIF1A/IFNG/PRKAA1/RRM2/SLC2A6/STAT3	7
BP	GO:0034440	lipid oxidation	7/172	112/18800	7.67811e-05	0.000681779	0.000382883	ALOX12/ALOX15/ALOX15B/MAPK14/PRKAA1/SCP2/SESN2	7
BP	GO:0010659	cardiac muscle cell apoptotic process	5/172	49/18800	8.32621e-05	0.000735781	0.00041321	BNIP3/HSF1/MAP3K5/NFE2L2/TP53	5
BP	GO:0030225	macrophage differentiation	5/172	49/18800	8.32621e-05	0.000735781	0.00041321	HSF1/IFNG/RB1/RIPK1/SIRT1	5
BP	GO:0042593	glucose homeostasis	10/172	244/18800	8.60136e-05	0.000752885	0.000422816	GCLC/HIF1A/HNF4A/IL6/PCK2/PIK3CA/PRKAA1/SESN2/SIRT1/STAT3	10
BP	GO:0045348	positive regulation of MHC class II biosynthetic process	3/172	10/18800	8.61404e-05	0.000752885	0.000422816	IFNG/SIRT1/TLR4	3
BP	GO:0070391	response to lipoteichoic acid	3/172	10/18800	8.61404e-05	0.000752885	0.000422816	MAPK14/RELA/TLR4	3
BP	GO:0071223	cellular response to lipoteichoic acid	3/172	10/18800	8.61404e-05	0.000752885	0.000422816	MAPK14/RELA/TLR4	3
BP	GO:0036296	response to increased oxygen levels	4/172	26/18800	8.64235e-05	0.000752885	0.000422816	ATG7/BNIP3/CAV1/NOX1	4
BP	GO:0070102	interleukin-6-mediated signaling pathway	4/172	26/18800	8.64235e-05	0.000752885	0.000422816	IL6/RIPK1/SRC/STAT3	4
BP	GO:0033500	carbohydrate homeostasis	10/172	245/18800	8.89756e-05	0.000770002	0.000432428	GCLC/HIF1A/HNF4A/IL6/PCK2/PIK3CA/PRKAA1/SESN2/SIRT1/STAT3	10
BP	GO:1903039	positive regulation of leukocyte cell-cell adhesion	10/172	245/18800	8.89756e-05	0.000770002	0.000432428	CAV1/CD44/DPP4/IFNG/IL6/MYB/PIK3CA/RELA/SOCS1/SRC	10
BP	GO:0032872	regulation of stress-activated MAPK cascade	9/172	198/18800	8.90954e-05	0.000770002	0.000432428	DUSP1/HRAS/MAP3K5/MAPK1/MAPK3/NOX1/PRDX1/RIPK1/TLR4	9
BP	GO:0010959	regulation of metal ion transport	13/172	403/18800	8.92241e-05	0.000770002	0.000432428	ATF4/ATG5/CAV1/DRD4/IFNG/ISCU/KLHL24/OXSR1/PML/PTGS2/RGS4/TF/YWHAE	13
BP	GO:0043271	negative regulation of ion transport	8/172	155/18800	9.16543e-05	0.000786993	0.000441971	ATF4/CAV1/DRD4/ISCU/OXSR1/PTGS2/RGS4/YWHAE	8
BP	GO:1901570	fatty acid derivative biosynthetic process	5/172	50/18800	9.18337e-05	0.000786993	0.000441971	ACSL3/ACSL4/ALOX12/ALOX15/ALOX15B	5
BP	GO:2001238	positive regulation of extrinsic apoptotic signaling pathway	5/172	50/18800	9.18337e-05	0.000786993	0.000441971	ATF3/BID/CAV1/PML/RIPK1	5
BP	GO:0008643	carbohydrate transport	8/172	156/18800	9.58659e-05	0.000818744	0.000459802	MAPK14/NFE2L2/SESN2/SLC2A1/SLC2A3/SLC2A6/SLC2A8/TRIB3	8
BP	GO:0007179	transforming growth factor beta receptor signaling pathway	9/172	200/18800	9.62052e-05	0.000818744	0.000459802	CAV1/GDF15/HSPA5/JUN/PML/SIRT1/SRC/STAT3/TP53	9
BP	GO:0034284	response to monosaccharide	9/172	200/18800	9.62052e-05	0.000818744	0.000459802	GCLC/HIF1A/HNF4A/PCK2/PIK3CA/PRKAA1/PTGS2/SESN2/TXNIP	9
BP	GO:0006096	glycolytic process	6/172	81/18800	9.88808e-05	0.000837646	0.000470417	DDIT4/HIF1A/IFNG/PRKAA1/SLC2A6/STAT3	6
BP	GO:0044773	mitotic DNA damage checkpoint signaling	6/172	81/18800	9.88808e-05	0.000837646	0.000470417	ATM/CDKN1A/FANCD2/MUC1/PML/TP53	6
BP	GO:0070302	regulation of stress-activated protein kinase signaling cascade	9/172	201/18800	9.9935e-05	0.000844634	0.000474341	DUSP1/HRAS/MAP3K5/MAPK1/MAPK3/NOX1/PRDX1/RIPK1/TLR4	9
BP	GO:1900017	positive regulation of cytokine production involved in inflammatory response	4/172	27/18800	0.000100732	0.00084837	0.00047644	HIF1A/IL6/STAT3/TLR4	4
BP	GO:0010658	striated muscle cell apoptotic process	5/172	51/18800	0.000101068	0.00084837	0.00047644	BNIP3/HSF1/MAP3K5/NFE2L2/TP53	5
BP	GO:1905710	positive regulation of membrane permeability	5/172	51/18800	0.000101068	0.00084837	0.00047644	BID/BNIP3/GCLC/MAPK8/TP53	5
BP	GO:0015833	peptide transport	10/172	249/18800	0.000101705	0.000851779	0.000478354	ABCC1/ACSL4/ARNTL/HIF1A/HNF4A/IFNG/IL6/NOS2/PCK2/TFR2	10
BP	GO:0006757	ATP generation from ADP	6/172	82/18800	0.000105887	0.000884792	0.000496894	DDIT4/HIF1A/IFNG/PRKAA1/SLC2A6/STAT3	6
BP	GO:0071383	cellular response to steroid hormone stimulus	9/172	203/18800	0.000107759	0.0008984	0.000504536	ARNTL/DDIT4/EGLN2/FLT3/NCOA4/PCK2/SIRT1/SRC/ZFP36	9
BP	GO:1904036	negative regulation of epithelial cell apoptotic process	5/172	52/18800	0.000110998	0.000923316	0.000518528	HMOX1/NFE2L2/PRKAA1/RB1/TNFAIP3	5
BP	GO:0043281	regulation of cysteine-type endopeptidase activity involved in apoptotic process	9/172	204/18800	0.00011186	0.000928387	0.000521377	BID/CD44/DNAJB6/HSF1/MAP3K5/PML/PTGS2/SIRT1/SRC	9
BP	GO:0050708	regulation of protein secretion	10/172	252/18800	0.000112236	0.000929413	0.000521953	ACSL4/ARNTL/DRD4/HIF1A/HNF4A/IFNG/IL6/NOS2/PCK2/TLR4	10
BP	GO:2000045	regulation of G1/S transition of mitotic cell cycle	8/172	160/18800	0.00011435	0.000944797	0.000530592	ATM/BID/CDKN1A/MUC1/PML/RB1/RRM2/TP53	8
BP	GO:0000303	response to superoxide	4/172	28/18800	0.000116686	0.000957907	0.000537955	GCH1/NFE2L2/NQO1/PRDX1	4
BP	GO:0090312	positive regulation of protein deacetylation	4/172	28/18800	0.000116686	0.000957907	0.000537955	IFNG/JDP2/SIRT1/TP53	4
BP	GO:0043161	proteasome-mediated ubiquitin-dependent protein catabolic process	13/172	414/18800	0.000116716	0.000957907	0.000537955	ARNTL/AURKA/CAV1/DDIT3/FBXW7/GCLC/HSPA5/KEAP1/MAPK9/NFE2L2/PML/SIRT1/TRIB3	13
BP	GO:2000392	regulation of lamellipodium morphogenesis	3/172	11/18800	0.000117647	0.000963396	0.000541037	CD44/ENPP2/SRC	3
BP	GO:0043122	regulation of I-kappaB kinase/NF-kappaB signaling	10/172	254/18800	0.000119757	0.000978506	0.000549523	BRD4/HMOX1/HSPB1/MTDH/RELA/RIPK1/SIRT1/SQSTM1/TLR4/TNFAIP3	10
BP	GO:1901988	negative regulation of cell cycle phase transition	10/172	255/18800	0.000123675	0.00100828	0.000566246	ATM/CDKN1A/DUSP1/EIF2AK4/FANCD2/MAPK14/MUC1/PML/RB1/TP53	10
BP	GO:0051101	regulation of DNA binding	7/172	121/18800	0.000124928	0.00101625	0.000570718	DDIT3/FBXW7/HMOX1/IFNG/JUN/MAPK8/RB1	7
BP	GO:0015711	organic anion transport	12/172	361/18800	0.000126419	0.00102611	0.000576256	ABCC1/DRD4/NOS2/PRKAA1/RGS4/SLC1A5/SLC2A1/SLC2A3/SLC2A6/SLC2A8/SLC38A1/SLC7A5	12
BP	GO:0010507	negative regulation of autophagy	6/172	85/18800	0.0001293	0.00104261	0.000585521	ATG7/BECN1/HMOX1/PIK3CA/STAT3/TP53	6
BP	GO:0044774	mitotic DNA integrity checkpoint signaling	6/172	85/18800	0.0001293	0.00104261	0.000585521	ATM/CDKN1A/FANCD2/MUC1/PML/TP53	6
BP	GO:0071229	cellular response to acid chemical	6/172	85/18800	0.0001293	0.00104261	0.000585521	CYBB/GCLC/HSF1/PIK3CA/SESN2/SOCS1	6
BP	GO:0006913	nucleocytoplasmic transport	11/172	308/18800	0.000129997	0.00104365	0.00058611	CDKN1A/ELAVL1/IFNG/MAPK14/PML/PTGS2/SQSTM1/STAT3/TP53/TXNIP/YWHAE	11
BP	GO:0051169	nuclear transport	11/172	308/18800	0.000129997	0.00104365	0.00058611	CDKN1A/ELAVL1/IFNG/MAPK14/PML/PTGS2/SQSTM1/STAT3/TP53/TXNIP/YWHAE	11
BP	GO:1903202	negative regulation of oxidative stress-induced cell death	5/172	54/18800	0.000133091	0.00106617	0.000598756	ATF4/HIF1A/HSPB1/NFE2L2/SIRT1	5
BP	GO:0000305	response to oxygen radical	4/172	29/18800	0.000134394	0.00107195	0.000602001	GCH1/NFE2L2/NQO1/PRDX1	4
BP	GO:1903203	regulation of oxidative stress-induced neuron death	4/172	29/18800	0.000134394	0.00107195	0.000602001	ATF4/FBXW7/HIF1A/TLR4	4
BP	GO:0046364	monosaccharide biosynthetic process	6/172	86/18800	0.000137955	0.00109562	0.000615291	ATF3/ATF4/PCK2/PGD/SESN2/SIRT1	6
BP	GO:2000134	negative regulation of G1/S transition of mitotic cell cycle	6/172	86/18800	0.000137955	0.00109562	0.000615291	ATM/CDKN1A/MUC1/PML/RB1/TP53	6
BP	GO:0050679	positive regulation of epithelial cell proliferation	9/172	211/18800	0.00014439	0.00114425	0.000642605	HIF1A/HMOX1/HRAS/JUN/NRAS/SIRT1/SP1/STAT3/TNFAIP3	9
BP	GO:0030218	erythrocyte differentiation	7/172	124/18800	0.000145565	0.00115109	0.000646445	ACVR1B/EPAS1/HIF1A/MAPK14/RB1/STAT3/ZFP36	7
BP	GO:0010232	vascular transport	6/172	87/18800	0.000147064	0.00115797	0.000650308	ABCC1/SLC1A5/SLC2A1/SLC2A3/SLC38A1/SLC7A5	6
BP	GO:0150104	transport across blood-brain barrier	6/172	87/18800	0.000147064	0.00115797	0.000650308	ABCC1/SLC1A5/SLC2A1/SLC2A3/SLC38A1/SLC7A5	6
BP	GO:0016049	cell growth	14/172	484/18800	0.000150887	0.00118554	0.000665791	ACVR1B/AURKA/BAP1/CDKN1A/EGLN2/EIF2AK4/HNF4A/PML/RB1/RGS4/SESN2/SIRT1/TP53/ULK2	14
BP	GO:1902230	negative regulation of intrinsic apoptotic signaling pathway in response to DNA damage	4/172	30/18800	0.000153968	0.00120367	0.000675976	BID/CD44/MUC1/SIRT1	4
BP	GO:0006534	cysteine metabolic process	3/172	12/18800	0.000155808	0.00120367	0.000675976	CBS/CDO1/GCLC	3
BP	GO:0006983	ER overload response	3/172	12/18800	0.000155808	0.00120367	0.000675976	DDIT3/HSPA5/TP53	3
BP	GO:0033212	iron import into cell	3/172	12/18800	0.000155808	0.00120367	0.000675976	IFNG/ISCU/TFR2	3
BP	GO:0036295	cellular response to increased oxygen levels	3/172	12/18800	0.000155808	0.00120367	0.000675976	ATG7/CAV1/NOX1	3
BP	GO:1903624	regulation of DNA catabolic process	3/172	12/18800	0.000155808	0.00120367	0.000675976	ATM/HSF1/IL6	3
BP	GO:1903800	positive regulation of production of miRNAs involved in gene silencing by miRNA	3/172	12/18800	0.000155808	0.00120367	0.000675976	IL6/RIPK1/TP53	3
BP	GO:1990253	cellular response to leucine starvation	3/172	12/18800	0.000155808	0.00120367	0.000675976	ATF4/EIF2AK4/SESN2	3
BP	GO:0034644	cellular response to UV	6/172	88/18800	0.000156641	0.00120758	0.00067817	ATF4/CDKN1A/EIF2AK4/PTGS2/SIRT1/TP53	6
BP	GO:0046031	ADP metabolic process	6/172	90/18800	0.000177275	0.0013638	0.000765901	DDIT4/HIF1A/IFNG/PRKAA1/SLC2A6/STAT3	6
BP	GO:0044282	small molecule catabolic process	12/172	376/18800	0.00018449	0.00141635	0.000795411	CBS/CDO1/GLS2/GOT1/GPT2/LPIN1/NOS2/PCK2/PGD/SCP2/SESN2/TP53	12
BP	GO:1901990	regulation of mitotic cell cycle phase transition	11/172	321/18800	0.000186366	0.00142488	0.000800207	ATM/AURKA/BID/BRD4/CDKN1A/DUSP1/MUC1/PML/RB1/RRM2/TP53	11
BP	GO:0016570	histone modification	14/172	494/18800	0.000186376	0.00142488	0.000800207	ATG5/ATM/AURKA/BAP1/BRD4/JDP2/MAPK3/MAPK8/MUC1/MYB/PRKAA1/SETD1B/SIRT1/TP53	14
BP	GO:0010498	proteasomal protein catabolic process	14/172	496/18800	0.000194279	0.00147655	0.000829222	ARNTL/AURKA/CAV1/DDIT3/FBXW7/GABARAPL2/GCLC/HSPA5/KEAP1/MAPK9/NFE2L2/PML/SIRT1/TRIB3	14
BP	GO:0010817	regulation of hormone levels	14/172	496/18800	0.000194279	0.00147655	0.000829222	ACSL4/ARNTL/DPP4/DUOX1/HIF1A/HNF4A/HSD17B11/IFNG/IL6/NOS2/PCK2/SLC7A5/SNX4/TFR2	14
BP	GO:0007093	mitotic cell cycle checkpoint signaling	7/172	130/18800	0.000195137	0.00147655	0.000829222	ATM/CDKN1A/DUSP1/FANCD2/MUC1/PML/TP53	7
BP	GO:0009132	nucleoside diphosphate metabolic process	7/172	130/18800	0.000195137	0.00147655	0.000829222	DDIT4/HIF1A/IFNG/PRKAA1/RRM2/SLC2A6/STAT3	7
BP	GO:0030168	platelet activation	7/172	130/18800	0.000195137	0.00147655	0.000829222	ALOX12/HSPB1/IL6/MAPK14/PIK3CA/SRC/TLR4	7
BP	GO:0007259	receptor signaling pathway via JAK-STAT	8/172	173/18800	0.000195884	0.00147916	0.00083069	CAV1/FLT3/HSF1/IFNG/IL6/NF2/SOCS1/STAT3	8
BP	GO:0030072	peptide hormone secretion	9/172	220/18800	0.000197494	0.00148828	0.000835806	ACSL4/ARNTL/HIF1A/HNF4A/IFNG/IL6/NOS2/PCK2/TFR2	9
BP	GO:1902253	regulation of intrinsic apoptotic signaling pathway by p53 class mediator	4/172	32/18800	0.000199173	0.00149787	0.000841192	CD44/MUC1/SIRT1/TP53	4
BP	GO:0098792	xenophagy	3/172	13/18800	0.00020119	0.00150995	0.000847977	ATG16L1/MAPK3/WIPI2	3
BP	GO:0010574	regulation of vascular endothelial growth factor production	5/172	59/18800	0.000203071	0.00151788	0.000852434	ATF4/HIF1A/IL6/NOX1/PTGS2	5
BP	GO:1902893	regulation of miRNA transcription	5/172	59/18800	0.000203071	0.00151788	0.000852434	HIF1A/JUN/RELA/STAT3/TP53	5
BP	GO:0010595	positive regulation of endothelial cell migration	7/172	131/18800	0.000204586	0.00152612	0.000857057	HIF1A/HMOX1/HSPB1/NFE2L2/PTGS2/SIRT1/SP1	7
BP	GO:0043534	blood vessel endothelial cell migration	8/172	175/18800	0.000211869	0.00157404	0.000883969	FBXW7/HIF1A/HMOX1/HSPB1/NFE2L2/PTGS2/SIRT1/SP1	8
BP	GO:0046890	regulation of lipid biosynthetic process	8/172	175/18800	0.000211869	0.00157404	0.000883969	ACSL3/FBXW7/IFNG/LPIN1/PRKAA1/PTGS2/SIRT1/TRIB3	8
BP	GO:0044772	mitotic cell cycle phase transition	13/172	440/18800	0.000212292	0.00157404	0.000883969	ACVR1B/ATM/AURKA/BACH1/BID/BRD4/CDKN1A/DUSP1/MUC1/PML/RB1/RRM2/TP53	13
BP	GO:0061614	miRNA transcription	5/172	60/18800	0.000219907	0.00162723	0.00091384	HIF1A/JUN/RELA/STAT3/TP53	5
BP	GO:1901606	alpha-amino acid catabolic process	6/172	94/18800	0.000224961	0.00165191	0.000927705	CBS/CDO1/GLS2/GOT1/GPT2/NOS2	6
BP	GO:1901655	cellular response to ketone	6/172	94/18800	0.000224961	0.00165191	0.000927705	DDIT4/NCOA4/PCK2/PRKAA1/SIRT1/SRC	6
BP	GO:0036475	neuron death in response to oxidative stress	4/172	33/18800	0.000225037	0.00165191	0.000927705	ATF4/FBXW7/HIF1A/TLR4	4
BP	GO:0045648	positive regulation of erythrocyte differentiation	4/172	33/18800	0.000225037	0.00165191	0.000927705	ACVR1B/HIF1A/MAPK14/STAT3	4
BP	GO:0033157	regulation of intracellular protein transport	9/172	224/18800	0.000225838	0.0016545	0.000929158	BAP1/FBXW7/HRAS/IFNG/MAPK14/MAPK8/PRKAA1/PTGS2/YWHAE	9
BP	GO:0002790	peptide secretion	9/172	225/18800	0.000233429	0.00170672	0.000958484	ACSL4/ARNTL/HIF1A/HNF4A/IFNG/IL6/NOS2/PCK2/TFR2	9
BP	GO:0051055	negative regulation of lipid biosynthetic process	5/172	61/18800	0.000237786	0.00173212	0.000972745	FBXW7/LPIN1/PRKAA1/SIRT1/TRIB3	5
BP	GO:0001936	regulation of endothelial cell proliferation	8/172	178/18800	0.000237843	0.00173212	0.000972745	CAV1/HIF1A/HMOX1/JUN/NRAS/SIRT1/SP1/STAT3	8
BP	GO:0043648	dicarboxylic acid metabolic process	6/172	95/18800	0.000238329	0.00173223	0.000972812	FH/GCLC/GLS2/GOT1/GPT2/PCK2	6
BP	GO:0030073	insulin secretion	8/172	179/18800	0.000247059	0.00179215	0.00100646	ACSL4/ARNTL/HIF1A/HNF4A/IFNG/IL6/NOS2/PCK2	8
BP	GO:0030316	osteoclast differentiation	6/172	96/18800	0.000252314	0.00182309	0.00102384	FBXW7/IFNG/MAPK14/SRC/TF/TLR4	6
BP	GO:1903321	negative regulation of protein modification by small protein conjugation or removal	6/172	96/18800	0.000252314	0.00182309	0.00102384	ATG5/CAV1/GCLC/RELA/SQSTM1/TNFAIP3	6
BP	GO:0000423	mitophagy	4/172	34/18800	0.000253232	0.00182615	0.00102555	ATG4D/BECN1/SQSTM1/TP53	4
BP	GO:0090239	regulation of histone H4 acetylation	3/172	14/18800	0.00025434	0.00183055	0.00102803	ATG5/MUC1/SIRT1	3
BP	GO:0043542	endothelial cell migration	10/172	279/18800	0.000256027	0.0018391	0.00103283	DPP4/FBXW7/HIF1A/HMOX1/HSPB1/NFE2L2/PIK3CA/PTGS2/SIRT1/SP1	10
BP	GO:0046902	regulation of mitochondrial membrane permeability	5/172	62/18800	0.000256748	0.00184069	0.00103372	BID/BNIP3/GCLC/MAPK8/TP53	5
BP	GO:2000116	regulation of cysteine-type endopeptidase activity	9/172	229/18800	0.000265946	0.0018953	0.00106439	BID/CD44/DNAJB6/HSF1/MAP3K5/PML/PTGS2/SIRT1/SRC	9
BP	GO:0032642	regulation of chemokine production	6/172	97/18800	0.000266937	0.0018953	0.00106439	ALOX15B/HIF1A/HMOX1/IFNG/IL6/TLR4	6
BP	GO:0043279	response to alkaloid	6/172	97/18800	0.000266937	0.0018953	0.00106439	DRD4/HSPA5/MAP1LC3A/NQO1/PRKAA1/RGS4	6
BP	GO:1902807	negative regulation of cell cycle G1/S phase transition	6/172	97/18800	0.000266937	0.0018953	0.00106439	ATM/CDKN1A/MUC1/PML/RB1/TP53	6
BP	GO:2001237	negative regulation of extrinsic apoptotic signaling pathway	6/172	97/18800	0.000266937	0.0018953	0.00106439	GCLC/HMOX1/RELA/RIPK1/SRC/TNFAIP3	6
BP	GO:0070371	ERK1 and ERK2 cascade	11/172	335/18800	0.000269044	0.00190503	0.00106986	ALOX15/ATF3/CD44/FBXW7/HRAS/JUN/MAPK1/MAPK3/SRC/TF/TLR4	11
BP	GO:0032434	regulation of proteasomal ubiquitin-dependent protein catabolic process	7/172	137/18800	0.000269341	0.00190503	0.00106986	AURKA/CAV1/GCLC/KEAP1/MAPK9/NFE2L2/TRIB3	7
BP	GO:0046879	hormone secretion	10/172	281/18800	0.000271043	0.0019134	0.00107455	ACSL4/ARNTL/HIF1A/HNF4A/IFNG/IL6/NOS2/PCK2/SNX4/TFR2	10
BP	GO:0006839	mitochondrial transport	8/172	182/18800	0.00027648	0.00194313	0.00109125	BAP1/BID/BNIP3/FBXW7/GCLC/MAPK8/PRKAA1/TP53	8
BP	GO:0006767	water-soluble vitamin metabolic process	5/172	63/18800	0.000276837	0.00194313	0.00109125	ABCC1/GCLC/PSAT1/SLC2A1/SLC2A3	5
BP	GO:0010573	vascular endothelial growth factor production	5/172	63/18800	0.000276837	0.00194313	0.00109125	ATF4/HIF1A/IL6/NOX1/PTGS2	5
BP	GO:0002718	regulation of cytokine production involved in immune response	6/172	98/18800	0.000282218	0.00196221	0.00110197	ATG5/HMOX1/IL6/SIRT1/SLC7A5/TLR4	6
BP	GO:0032602	chemokine production	6/172	98/18800	0.000282218	0.00196221	0.00110197	ALOX15B/HIF1A/HMOX1/IFNG/IL6/TLR4	6
BP	GO:0034620	cellular response to unfolded protein	6/172	98/18800	0.000282218	0.00196221	0.00110197	ATF3/ATF4/DDIT3/HSF1/HSPA5/NFE2L2	6
BP	GO:0120162	positive regulation of cold-induced thermogenesis	6/172	98/18800	0.000282218	0.00196221	0.00110197	CAV1/EPAS1/FH/HSF1/LPIN1/SCD	6
BP	GO:1904063	negative regulation of cation transmembrane transport	6/172	98/18800	0.000282218	0.00196221	0.00110197	CAV1/DRD4/ISCU/OXSR1/RGS4/YWHAE	6
BP	GO:0016242	negative regulation of macroautophagy	4/172	35/18800	0.000283879	0.00196265	0.00110221	BECN1/HMOX1/PIK3CA/TP53	4
BP	GO:0097345	mitochondrial outer membrane permeabilization	4/172	35/18800	0.000283879	0.00196265	0.00110221	BID/BNIP3/GCLC/MAPK8	4
BP	GO:1905898	positive regulation of response to endoplasmic reticulum stress	4/172	35/18800	0.000283879	0.00196265	0.00110221	CAV1/DDIT3/NFE2L2/SIRT1	4
BP	GO:0006986	response to unfolded protein	7/172	139/18800	0.00029426	0.00203061	0.00114038	ATF3/ATF4/DDIT3/HSF1/HSPA5/HSPB1/NFE2L2	7
BP	GO:0097696	receptor signaling pathway via STAT	8/172	184/18800	0.000297641	0.00204997	0.00115125	CAV1/FLT3/HSF1/IFNG/IL6/NF2/SOCS1/STAT3	8
BP	GO:0006165	nucleoside diphosphate phosphorylation	6/172	99/18800	0.000298177	0.00204997	0.00115125	DDIT4/HIF1A/IFNG/PRKAA1/SLC2A6/STAT3	6
BP	GO:0022407	regulation of cell-cell adhesion	13/172	456/18800	0.000299632	0.00205613	0.00115471	ALOX12/CAV1/CD44/DPP4/IFNG/IL6/MAPK14/MYB/NF2/PIK3CA/RELA/SOCS1/SRC	13
BP	GO:0002367	cytokine production involved in immune response	6/172	100/18800	0.000314836	0.00214703	0.00120576	ATG5/HMOX1/IL6/SIRT1/SLC7A5/TLR4	6
BP	GO:0046939	nucleotide phosphorylation	6/172	100/18800	0.000314836	0.00214703	0.00120576	DDIT4/HIF1A/IFNG/PRKAA1/SLC2A6/STAT3	6
BP	GO:0035358	regulation of peroxisome proliferator activated receptor signaling pathway	3/172	15/18800	0.000315791	0.00214703	0.00120576	ALOX15/ALOX15B/SIRT1	3
BP	GO:0045346	regulation of MHC class II biosynthetic process	3/172	15/18800	0.000315791	0.00214703	0.00120576	IFNG/SIRT1/TLR4	3
BP	GO:1902166	negative regulation of intrinsic apoptotic signaling pathway in response to DNA damage by p53 class mediator	3/172	15/18800	0.000315791	0.00214703	0.00120576	CD44/MUC1/SIRT1	3
BP	GO:1903146	regulation of autophagy of mitochondrion	4/172	36/18800	0.000317099	0.002148	0.0012063	BNIP3/FBXW7/HIF1A/TP53	4
BP	GO:1903749	positive regulation of establishment of protein localization to mitochondrion	4/172	36/18800	0.000317099	0.002148	0.0012063	BAP1/FBXW7/MAPK8/PRKAA1	4
BP	GO:0031100	animal organ regeneration	5/172	65/18800	0.000320573	0.00215973	0.00121289	AURKA/FLT3/HMOX1/IL6/LPIN1	5
BP	GO:0042886	amide transport	10/172	287/18800	0.00032059	0.00215973	0.00121289	ABCC1/ACSL4/ARNTL/HIF1A/HNF4A/IFNG/IL6/NOS2/PCK2/TFR2	10
BP	GO:0044262	cellular carbohydrate metabolic process	10/172	287/18800	0.00032059	0.00215973	0.00121289	DDIT4/GOT1/PCK2/PGD/PHKG2/SESN2/SIRT1/SRC/STAT3/TP53	10
BP	GO:0007249	I-kappaB kinase/NF-kappaB signaling	10/172	288/18800	0.000329541	0.00221598	0.00124448	BRD4/HMOX1/HSPB1/MTDH/RELA/RIPK1/SIRT1/SQSTM1/TLR4/TNFAIP3	10
BP	GO:0043254	regulation of protein-containing complex assembly	12/172	401/18800	0.000331848	0.00222743	0.00125091	ALOX15/ATM/BID/CAPG/HSF1/HSPA5/IFNG/MAPK9/RB1/SRC/TLR4/TP53	12
BP	GO:0070265	necrotic cell death	5/172	66/18800	0.000344309	0.00230687	0.00129552	BNIP3/CAV1/MAP3K5/RIPK1/TP53	5
BP	GO:0006739	NADP metabolic process	4/172	37/18800	0.000353014	0.00235663	0.00132347	NOX1/NQO1/PGD/TP53	4
BP	GO:2000758	positive regulation of peptidyl-lysine acetylation	4/172	37/18800	0.000353014	0.00235663	0.00132347	MAPK3/MUC1/PML/PRKAA1	4
BP	GO:0009749	response to glucose	8/172	189/18800	0.000356388	0.00237485	0.0013337	GCLC/HIF1A/HNF4A/PCK2/PIK3CA/PRKAA1/SESN2/TXNIP	8
BP	GO:0022409	positive regulation of cell-cell adhesion	10/172	291/18800	0.000357656	0.00237899	0.00133603	CAV1/CD44/DPP4/IFNG/IL6/MYB/PIK3CA/RELA/SOCS1/SRC	10
BP	GO:0009135	purine nucleoside diphosphate metabolic process	6/172	103/18800	0.000369227	0.00244712	0.00137429	DDIT4/HIF1A/IFNG/PRKAA1/SLC2A6/STAT3	6
BP	GO:0009179	purine ribonucleoside diphosphate metabolic process	6/172	103/18800	0.000369227	0.00244712	0.00137429	DDIT4/HIF1A/IFNG/PRKAA1/SLC2A6/STAT3	6
BP	GO:0043524	negative regulation of neuron apoptotic process	7/172	145/18800	0.000380321	0.00251162	0.00141051	GCLC/HIF1A/HMOX1/HRAS/JUN/KRAS/PIK3CA	7
BP	GO:0050729	positive regulation of inflammatory response	7/172	145/18800	0.000380321	0.00251162	0.00141051	ABCC1/IFNG/IL6/PTGS2/RIPK1/SNX4/TLR4	7
BP	GO:0042532	negative regulation of tyrosine phosphorylation of STAT protein	3/172	16/18800	0.000386058	0.00253136	0.0014216	CAV1/NF2/SOCS1	3
BP	GO:0045342	MHC class II biosynthetic process	3/172	16/18800	0.000386058	0.00253136	0.0014216	IFNG/SIRT1/TLR4	3
BP	GO:0045651	positive regulation of macrophage differentiation	3/172	16/18800	0.000386058	0.00253136	0.0014216	HSF1/RB1/RIPK1	3
BP	GO:0070431	nucleotide-binding oligomerization domain containing 2 signaling pathway	3/172	16/18800	0.000386058	0.00253136	0.0014216	RELA/TLR4/TNFAIP3	3
BP	GO:0034766	negative regulation of ion transmembrane transport	6/172	104/18800	0.000388902	0.00254548	0.00142953	CAV1/DRD4/ISCU/OXSR1/RGS4/YWHAE	6
BP	GO:0009306	protein secretion	11/172	350/18800	0.000390085	0.0025487	0.00143133	ACSL4/ARNTL/DRD4/HIF1A/HNF4A/IFNG/IL6/NOS2/PCK2/STEAP3/TLR4	11
BP	GO:1902229	regulation of intrinsic apoptotic signaling pathway in response to DNA damage	4/172	38/18800	0.000391749	0.00255503	0.00143489	BID/CD44/MUC1/SIRT1	4
BP	GO:0035592	establishment of protein localization to extracellular region	11/172	351/18800	0.000399564	0.0026014	0.00146093	ACSL4/ARNTL/DRD4/HIF1A/HNF4A/IFNG/IL6/NOS2/PCK2/STEAP3/TLR4	11
BP	GO:0001935	endothelial cell proliferation	8/172	194/18800	0.000424262	0.00275248	0.00154577	CAV1/HIF1A/HMOX1/JUN/NRAS/SIRT1/SP1/STAT3	8
BP	GO:0031334	positive regulation of protein-containing complex assembly	8/172	194/18800	0.000424262	0.00275248	0.00154577	ALOX15/ATM/BID/IFNG/MAPK9/SRC/TLR4/TP53	8
BP	GO:0019395	fatty acid oxidation	6/172	106/18800	0.000430707	0.00278937	0.0015665	ALOX12/ALOX15/MAPK14/PRKAA1/SCP2/SESN2	6
BP	GO:0043267	negative regulation of potassium ion transport	4/172	39/18800	0.000433427	0.00279227	0.00156812	ATF4/CAV1/OXSR1/RGS4	4
BP	GO:0043687	post-translational protein modification	4/172	39/18800	0.000433427	0.00279227	0.00156812	ATG16L1/ATG5/ATG7/WIPI2	4
BP	GO:1901031	regulation of response to reactive oxygen species	4/172	39/18800	0.000433427	0.00279227	0.00156812	GCH1/NFE2L2/RIPK1/SESN2	4
BP	GO:0044272	sulfur compound biosynthetic process	7/172	149/18800	0.000448115	0.00288129	0.00161811	ACSL3/ACSL4/CBS/CDO1/GCLC/NFE2L2/SP1	7
BP	GO:2001020	regulation of response to DNA damage stimulus	9/172	246/18800	0.000449012	0.00288129	0.00161811	ATM/BID/CD44/HIC1/HSF1/MUC1/PML/SIRT1/TP53	9
BP	GO:0033674	positive regulation of kinase activity	13/172	476/18800	0.000450495	0.00288129	0.00161811	CDKN1A/DRD4/FBXW7/FLT3/HRAS/IFNG/MAP3K5/PIK3CA/SIRT1/SOCS1/SRC/TLR4/VLDLR	13
BP	GO:0001558	regulation of cell growth	12/172	415/18800	0.000451299	0.00288129	0.00161811	ACVR1B/BAP1/CDKN1A/EGLN2/HNF4A/PML/RB1/RGS4/SESN2/SIRT1/TP53/ULK2	12
BP	GO:1901607	alpha-amino acid biosynthetic process	5/172	70/18800	0.000452781	0.00288129	0.00161811	ASNS/CBS/GLS2/GOT1/PSAT1	5
BP	GO:0008637	apoptotic mitochondrial changes	6/172	107/18800	0.000452882	0.00288129	0.00161811	ATG3/BID/BNIP3/GCLC/MAPK8/TP53	6
BP	GO:0033138	positive regulation of peptidyl-serine phosphorylation	6/172	107/18800	0.000452882	0.00288129	0.00161811	CAV1/CD44/IFNG/IL6/PIK3CA/PTGS2	6
BP	GO:0043393	regulation of protein binding	8/172	196/18800	0.000454196	0.00288129	0.00161811	AURKA/CAV1/CDKN1A/HSF1/MAPK3/MAPK8/SRC/TRIB3	8
BP	GO:0031647	regulation of protein stability	10/172	300/18800	0.000454282	0.00288129	0.00161811	AURKA/FBXW7/KRAS/LAMP2/MAPK1/NF2/SIRT1/SRC/TF/TP53	10
BP	GO:0006978	DNA damage response, signal transduction by p53 class mediator resulting in transcription of p21 class mediator	3/172	17/18800	0.000465641	0.00289882	0.00162796	CDKN1A/MUC1/TP53	3
BP	GO:0010663	positive regulation of striated muscle cell apoptotic process	3/172	17/18800	0.000465641	0.00289882	0.00162796	BNIP3/MAP3K5/TP53	3
BP	GO:0010666	positive regulation of cardiac muscle cell apoptotic process	3/172	17/18800	0.000465641	0.00289882	0.00162796	BNIP3/MAP3K5/TP53	3
BP	GO:0055089	fatty acid homeostasis	3/172	17/18800	0.000465641	0.00289882	0.00162796	GOT1/PRKAA1/SIRT1	3
BP	GO:0072673	lamellipodium morphogenesis	3/172	17/18800	0.000465641	0.00289882	0.00162796	CD44/ENPP2/SRC	3
BP	GO:0090399	replicative senescence	3/172	17/18800	0.000465641	0.00289882	0.00162796	ATM/CDKN1A/TP53	3
BP	GO:0090594	inflammatory response to wounding	3/172	17/18800	0.000465641	0.00289882	0.00162796	HIF1A/HMOX1/TLR4	3
BP	GO:1902165	regulation of intrinsic apoptotic signaling pathway in response to DNA damage by p53 class mediator	3/172	17/18800	0.000465641	0.00289882	0.00162796	CD44/MUC1/SIRT1	3
BP	GO:2000811	negative regulation of anoikis	3/172	17/18800	0.000465641	0.00289882	0.00162796	CAV1/PIK3CA/SRC	3
BP	GO:0010948	negative regulation of cell cycle process	10/172	301/18800	0.000466244	0.00289882	0.00162796	ATM/CDKN1A/DUSP1/EIF2AK4/FANCD2/MAPK14/MUC1/PML/RB1/TP53	10
BP	GO:0007584	response to nutrient	7/172	150/18800	0.000466486	0.00289882	0.00162796	BECN1/CYBB/GCLC/HMOX1/HSF1/NQO1/PTGS2	7
BP	GO:0010675	regulation of cellular carbohydrate metabolic process	7/172	150/18800	0.000466486	0.00289882	0.00162796	DDIT4/PHKG2/SESN2/SIRT1/SRC/STAT3/TP53	7
BP	GO:0002699	positive regulation of immune effector process	9/172	248/18800	0.0004761	0.00295358	0.00165871	HMOX1/IFNG/IL6/MYB/NOS2/SIRT1/SLC7A5/SNX4/TLR4	9
BP	GO:0009069	serine family amino acid metabolic process	4/172	40/18800	0.000478174	0.00296146	0.00166314	CBS/CDO1/GCLC/PSAT1	4
BP	GO:0016032	viral process	12/172	418/18800	0.000481141	0.00297484	0.00167065	ATG16L1/ATG5/ATG7/CAV1/CHMP5/CHMP6/EIF2AK4/JUN/SLC1A5/SP1/TP53/ZFP36	12
BP	GO:0071692	protein localization to extracellular region	11/172	359/18800	0.000482599	0.00297885	0.00167291	ACSL4/ARNTL/DRD4/HIF1A/HNF4A/IFNG/IL6/NOS2/PCK2/STEAP3/TLR4	11
BP	GO:0006766	vitamin metabolic process	6/172	109/18800	0.000499899	0.00307534	0.00172709	ABCC1/GCLC/IFNG/PSAT1/SLC2A1/SLC2A3	6
BP	GO:0071887	leukocyte apoptotic process	6/172	109/18800	0.000499899	0.00307534	0.00172709	HIF1A/IL6/RIPK1/SIRT1/TP53/TSC22D3	6
BP	GO:0043266	regulation of potassium ion transport	6/172	110/18800	0.000524788	0.00322049	0.00180861	ATF4/CAV1/KLHL24/OXSR1/RGS4/YWHAE	6
BP	GO:0045124	regulation of bone resorption	4/172	41/18800	0.000526116	0.00322049	0.00180861	IL6/SRC/TF/TNFAIP3	4
BP	GO:1902110	positive regulation of mitochondrial membrane permeability involved in apoptotic process	4/172	41/18800	0.000526116	0.00322049	0.00180861	BID/BNIP3/GCLC/MAPK8	4
BP	GO:0071560	cellular response to transforming growth factor beta stimulus	9/172	252/18800	0.000534316	0.00326526	0.00183375	CAV1/GDF15/HSPA5/JUN/PML/SIRT1/SRC/STAT3/TP53	9
BP	GO:0150076	neuroinflammatory response	5/172	73/18800	0.000549675	0.00334846	0.00188048	ATM/IFNG/IL6/JUN/PTGS2	5
BP	GO:0045017	glycerolipid biosynthetic process	9/172	253/18800	0.000549747	0.00334846	0.00188048	ACSL3/ALOX15/ATM/BECN1/FBXW7/LPIN1/PCK2/PIK3CA/SOCS1	9
BP	GO:0010940	positive regulation of necrotic cell death	3/172	18/18800	0.000555023	0.00335839	0.00188605	BNIP3/RIPK1/TP53	3
BP	GO:0042772	DNA damage response, signal transduction resulting in transcription	3/172	18/18800	0.000555023	0.00335839	0.00188605	CDKN1A/MUC1/TP53	3
BP	GO:0097284	hepatocyte apoptotic process	3/172	18/18800	0.000555023	0.00335839	0.00188605	BID/PRKAA1/RB1	3
BP	GO:2000641	regulation of early endosome to late endosome transport	3/172	18/18800	0.000555023	0.00335839	0.00188605	MAPK1/MAPK3/SRC	3
BP	GO:0002683	negative regulation of immune system process	12/172	425/18800	0.000557307	0.00336668	0.00189071	ALOX15/ATM/DPP4/DUSP1/FBXW7/HMOX1/MAPK14/SOCS1/SRC/TLR4/TNFAIP3/TSC22D3	12
BP	GO:0032735	positive regulation of interleukin-12 production	4/172	42/18800	0.000577379	0.00347131	0.00194947	IFNG/MAPK14/RELA/TLR4	4
BP	GO:0045022	early endosome to late endosome transport	4/172	42/18800	0.000577379	0.00347131	0.00194947	BECN1/MAPK1/MAPK3/SRC	4
BP	GO:0009063	cellular amino acid catabolic process	6/172	112/18800	0.000577453	0.00347131	0.00194947	CBS/CDO1/GLS2/GOT1/GPT2/NOS2	6
BP	GO:1901568	fatty acid derivative metabolic process	5/172	74/18800	0.000585195	0.00351213	0.00197239	ACSL3/ACSL4/ALOX12/ALOX15/ALOX15B	5
BP	GO:0120254	olefinic compound metabolic process	7/172	157/18800	0.000612567	0.00367042	0.00206129	ALOX12/ALOX15/ALOX15B/ALOXE3/GPX4/PTGS2/SCP2	7
BP	GO:0071230	cellular response to amino acid stimulus	5/172	75/18800	0.00062241	0.00372335	0.00209101	CYBB/GCLC/HSF1/SESN2/SOCS1	5
BP	GO:0014002	astrocyte development	4/172	43/18800	0.000632092	0.00375926	0.00211118	IFNG/IL6/KRAS/TLR4	4
BP	GO:0031063	regulation of histone deacetylation	4/172	43/18800	0.000632092	0.00375926	0.00211118	JDP2/MAPK8/SIRT1/TP53	4
BP	GO:1902686	mitochondrial outer membrane permeabilization involved in programmed cell death	4/172	43/18800	0.000632092	0.00375926	0.00211118	BID/BNIP3/GCLC/MAPK8	4
BP	GO:0071559	response to transforming growth factor beta	9/172	258/18800	0.000632495	0.00375926	0.00211118	CAV1/GDF15/HSPA5/JUN/PML/SIRT1/SRC/STAT3/TP53	9
BP	GO:2000269	regulation of fibroblast apoptotic process	3/172	19/18800	0.000654674	0.0038772	0.00217741	BID/PIK3CA/TP53	3
BP	GO:2000786	positive regulation of autophagosome assembly	3/172	19/18800	0.000654674	0.0038772	0.00217741	BECN1/SNX4/WIPI1	3
BP	GO:0048608	reproductive structure development	12/172	433/18800	0.000656546	0.0038772	0.00217741	ALOX15B/ATM/DNAJB6/EPAS1/HIF1A/HSPA5/MAPK1/MAPK14/NCOA4/PTGS2/SIRT1/SRC	12
BP	GO:1903131	mononuclear cell differentiation	12/172	433/18800	0.000656546	0.0038772	0.00217741	ATG5/ATM/FANCD2/FLT3/IFNG/IL6/JUN/MT1G/MYB/SOCS1/STAT3/TP53	12
BP	GO:0008652	cellular amino acid biosynthetic process	5/172	76/18800	0.000661371	0.00389322	0.00218641	ASNS/CBS/GLS2/GOT1/PSAT1	5
BP	GO:0030968	endoplasmic reticulum unfolded protein response	5/172	76/18800	0.000661371	0.00389322	0.00218641	ATF3/ATF4/DDIT3/HSPA5/NFE2L2	5
BP	GO:0071902	positive regulation of protein serine/threonine kinase activity	8/172	208/18800	0.000671892	0.00394884	0.00221764	DRD4/FLT3/HRAS/IFNG/MAP3K5/SIRT1/SRC/TLR4	8
BP	GO:0035966	response to topologically incorrect protein	7/172	160/18800	0.000685341	0.00402147	0.00225843	ATF3/ATF4/DDIT3/HSF1/HSPA5/HSPB1/NFE2L2	7
BP	GO:0002066	columnar/cuboidal epithelial cell development	4/172	44/18800	0.000690381	0.00403178	0.00226422	ARNTL/HIF1A/HNF4A/SRC	4
BP	GO:0045981	positive regulation of nucleotide metabolic process	4/172	44/18800	0.000690381	0.00403178	0.00226422	HIF1A/IFNG/NOS2/PRKAA1	4
BP	GO:1900544	positive regulation of purine nucleotide metabolic process	4/172	44/18800	0.000690381	0.00403178	0.00226422	HIF1A/IFNG/NOS2/PRKAA1	4
BP	GO:0016051	carbohydrate biosynthetic process	8/172	209/18800	0.000693286	0.00403977	0.00226871	ATF3/ATF4/GOT1/PCK2/PGD/PHKG2/SESN2/SIRT1	8
BP	GO:0002286	T cell activation involved in immune response	6/172	116/18800	0.000695037	0.00403977	0.00226871	EIF2AK4/IFNG/IL6/MYB/STAT3/TP53	6
BP	GO:0043406	positive regulation of MAP kinase activity	6/172	116/18800	0.000695037	0.00403977	0.00226871	DRD4/FLT3/HRAS/MAP3K5/SRC/TLR4	6
BP	GO:0006605	protein targeting	10/172	317/18800	0.000696198	0.00404014	0.00226892	ATG3/BAP1/BID/FBXW7/HRAS/HSPA5/LAMP2/NCOA4/PRKAA1/YWHAE	10
BP	GO:0061458	reproductive system development	12/172	436/18800	0.0006974	0.00404075	0.00226926	ALOX15B/ATM/DNAJB6/EPAS1/HIF1A/HSPA5/MAPK1/MAPK14/NCOA4/PTGS2/SIRT1/SRC	12
BP	GO:0090559	regulation of membrane permeability	5/172	77/18800	0.00070213	0.00406177	0.00228107	BID/BNIP3/GCLC/MAPK8/TP53	5
BP	GO:0051054	positive regulation of DNA metabolic process	9/172	263/18800	0.000725171	0.00418672	0.00235124	ATM/HSF1/IL6/LPIN1/MAPK1/MAPK3/PML/SIRT1/SRC	9
BP	GO:0002761	regulation of myeloid leukocyte differentiation	6/172	117/18800	0.000727138	0.00418672	0.00235124	FBXW7/HSF1/IFNG/RB1/RIPK1/TLR4	6
BP	GO:0035967	cellular response to topologically incorrect protein	6/172	117/18800	0.000727138	0.00418672	0.00235124	ATF3/ATF4/DDIT3/HSF1/HSPA5/NFE2L2	6
BP	GO:0009064	glutamine family amino acid metabolic process	5/172	78/18800	0.000744738	0.00428137	0.00240439	ASNS/GCLC/GLS2/GOT1/NOS2	5
BP	GO:0016572	histone phosphorylation	4/172	45/18800	0.000752374	0.00430512	0.00241773	ATM/AURKA/MAPK3/PRKAA1	4
BP	GO:0031295	T cell costimulation	4/172	45/18800	0.000752374	0.00430512	0.00241773	CAV1/DPP4/PIK3CA/SRC	4
BP	GO:0098927	vesicle-mediated transport between endosomal compartments	4/172	45/18800	0.000752374	0.00430512	0.00241773	BECN1/MAPK1/MAPK3/SRC	4
BP	GO:0006476	protein deacetylation	6/172	118/18800	0.000760374	0.00432488	0.00242883	IFNG/JDP2/MAPK8/PRKAA1/SIRT1/TP53	6
BP	GO:0008286	insulin receptor signaling pathway	6/172	118/18800	0.000760374	0.00432488	0.00242883	PIK3CA/PRKAA1/SIRT1/SLC2A8/SOCS1/SRC	6
BP	GO:0033044	regulation of chromosome organization	8/172	212/18800	0.000760784	0.00432488	0.00242883	ATM/BECN1/DUSP1/MAPK1/MAPK3/PML/RB1/SRC	8
BP	GO:0007568	aging	7/172	163/18800	0.000764807	0.00432488	0.00242883	BECN1/CISD2/GCLC/GPX4/NFE2L2/NQO1/PTGS2	7
BP	GO:0010288	response to lead ion	3/172	20/18800	0.000765045	0.00432488	0.00242883	BECN1/MAP1LC3A/PTGS2	3
BP	GO:0045821	positive regulation of glycolytic process	3/172	20/18800	0.000765045	0.00432488	0.00242883	HIF1A/IFNG/PRKAA1	3
BP	GO:1902004	positive regulation of amyloid-beta formation	3/172	20/18800	0.000765045	0.00432488	0.00242883	IFNG/RELA/SP1	3
BP	GO:0051091	positive regulation of DNA-binding transcription factor activity	9/172	265/18800	0.000765217	0.00432488	0.00242883	CAV1/DDIT3/HSF1/IL6/MTDH/RELA/RIPK1/STAT3/TLR4	9
BP	GO:0032103	positive regulation of response to external stimulus	12/172	442/18800	0.000785528	0.00442676	0.00248604	ABCC1/HSPB1/IFNG/IL6/MAPK1/MAPK3/OXSR1/PTGS2/RIPK1/SNX4/SRC/TLR4	12
BP	GO:0006094	gluconeogenesis	5/172	79/18800	0.000789249	0.00442676	0.00248604	ATF3/ATF4/PCK2/SESN2/SIRT1	5
BP	GO:0006970	response to osmotic stress	5/172	79/18800	0.000789249	0.00442676	0.00248604	OXSR1/PTGS2/SLC2A1/TP53/TSC22D3	5
BP	GO:0046323	glucose import	5/172	79/18800	0.000789249	0.00442676	0.00248604	MAPK14/NFE2L2/SESN2/SLC2A1/SLC2A3	5
BP	GO:0048145	regulation of fibroblast proliferation	5/172	79/18800	0.000789249	0.00442676	0.00248604	CDKN1A/FTH1/JUN/PML/TP53	5
BP	GO:0045471	response to ethanol	6/172	119/18800	0.000794772	0.00444421	0.00249584	CDO1/CYBB/DRD4/NQO1/PRKAA1/RGS4	6
BP	GO:2000278	regulation of DNA biosynthetic process	6/172	119/18800	0.000794772	0.00444421	0.00249584	ATM/CDKN1A/MAPK1/MAPK3/SRC/TP53	6
BP	GO:0010939	regulation of necrotic cell death	4/172	46/18800	0.000818201	0.00456829	0.00256552	BNIP3/CAV1/RIPK1/TP53	4
BP	GO:0072655	establishment of protein localization to mitochondrion	6/172	120/18800	0.00083036	0.00462916	0.00259971	BAP1/BID/DDIT3/FBXW7/MAPK8/PRKAA1	6
BP	GO:0001895	retina homeostasis	5/172	80/18800	0.000835716	0.00463797	0.00260466	ALB/HSPB1/PRDX1/SLC2A1/TF	5
BP	GO:0032204	regulation of telomere maintenance	5/172	80/18800	0.000835716	0.00463797	0.00260466	ATM/MAPK1/MAPK3/PML/SRC	5
BP	GO:1902117	positive regulation of organelle assembly	5/172	80/18800	0.000835716	0.00463797	0.00260466	BECN1/MAPK9/SNX4/SRC/WIPI1	5
BP	GO:0010876	lipid localization	12/172	446/18800	0.000849313	0.00469928	0.00263909	ABCC1/ACSL3/CAV1/DRD4/FBXW7/IL6/NOS2/PRKAA1/SCP2/SIRT1/SLC2A1/VLDLR	12
BP	GO:0045785	positive regulation of cell adhesion	12/172	446/18800	0.000849313	0.00469928	0.00263909	ALOX15/ATM/CAV1/CD44/DPP4/IFNG/IL6/MYB/PIK3CA/RELA/SOCS1/SRC	12
BP	GO:0031398	positive regulation of protein ubiquitination	6/172	121/18800	0.000867165	0.00478369	0.00268649	ARRDC3/CAV1/FBXW7/HSPA5/MAPK9/TRIB3	6
BP	GO:0071482	cellular response to light stimulus	6/172	121/18800	0.000867165	0.00478369	0.00268649	ATF4/CDKN1A/EIF2AK4/PTGS2/SIRT1/TP53	6
BP	GO:0034250	positive regulation of cellular amide metabolic process	7/172	167/18800	0.000881917	0.00481212	0.00270246	EIF2AK4/ELAVL1/IFNG/IL6/NFE2L2/RELA/SP1	7
BP	GO:0045445	myoblast differentiation	5/172	81/18800	0.000884192	0.00481212	0.00270246	DDIT3/EPAS1/MAP3K5/MAPK14/RB1	5
BP	GO:0048144	fibroblast proliferation	5/172	81/18800	0.000884192	0.00481212	0.00270246	CDKN1A/FTH1/JUN/PML/TP53	5
BP	GO:0000083	regulation of transcription involved in G1/S transition of mitotic cell cycle	3/172	21/18800	0.000886577	0.00481212	0.00270246	BACH1/BRD4/RB1	3
BP	GO:0036092	phosphatidylinositol-3-phosphate biosynthetic process	3/172	21/18800	0.000886577	0.00481212	0.00270246	ATM/BECN1/PIK3CA	3
BP	GO:0038083	peptidyl-tyrosine autophosphorylation	3/172	21/18800	0.000886577	0.00481212	0.00270246	CAV1/MAPK3/SRC	3
BP	GO:0044090	positive regulation of vacuole organization	3/172	21/18800	0.000886577	0.00481212	0.00270246	BECN1/SNX4/WIPI1	3
BP	GO:0071498	cellular response to fluid shear stress	3/172	21/18800	0.000886577	0.00481212	0.00270246	NFE2L2/PTGS2/SRC	3
BP	GO:0001774	microglial cell activation	4/172	47/18800	0.00088799	0.00481212	0.00270246	ATM/IFNG/IL6/JUN	4
BP	GO:0031294	lymphocyte costimulation	4/172	47/18800	0.00088799	0.00481212	0.00270246	CAV1/DPP4/PIK3CA/SRC	4
BP	GO:0051972	regulation of telomerase activity	4/172	47/18800	0.00088799	0.00481212	0.00270246	MAPK1/MAPK3/SRC/TP53	4
BP	GO:0070849	response to epidermal growth factor	4/172	47/18800	0.00088799	0.00481212	0.00270246	BECN1/MAPK1/MAPK3/ZFP36	4
BP	GO:0071901	negative regulation of protein serine/threonine kinase activity	6/172	122/18800	0.000905216	0.00489827	0.00275084	CAV1/CDKN1A/DUSP1/RB1/SIRT1/TNFAIP3	6
BP	GO:0010001	glial cell differentiation	8/172	218/18800	0.000911651	0.00492586	0.00276633	BNIP3/IFNG/IL6/KRAS/MAPK1/MAPK3/STAT3/TLR4	8
BP	GO:0006644	phospholipid metabolic process	11/172	388/18800	0.000914546	0.00493426	0.00277105	ACSL3/ALOX15/ALOX15B/ATM/BECN1/ENPP2/GPX4/LPIN1/PIK3CA/PRDX6/SOCS1	11
BP	GO:0019319	hexose biosynthetic process	5/172	82/18800	0.000934731	0.00501381	0.00281572	ATF3/ATF4/PCK2/SESN2/SIRT1	5
BP	GO:0043367	CD4-positive, alpha-beta T cell differentiation	5/172	82/18800	0.000934731	0.00501381	0.00281572	IFNG/IL6/MYB/SOCS1/STAT3	5
BP	GO:1905897	regulation of response to endoplasmic reticulum stress	5/172	82/18800	0.000934731	0.00501381	0.00281572	CAV1/DDIT3/HSPA5/NFE2L2/SIRT1	5
BP	GO:2001021	negative regulation of response to DNA damage stimulus	5/172	82/18800	0.000934731	0.00501381	0.00281572	BID/CD44/HSF1/MUC1/SIRT1	5
BP	GO:0051651	maintenance of location in cell	8/172	219/18800	0.000938978	0.00502927	0.00282441	ALB/ATG5/CAV1/DDIT3/FTH1/FTL/HSPA5/PML	8
BP	GO:0046034	ATP metabolic process	9/172	273/18800	0.000943859	0.00503641	0.00282842	BID/DDIT4/HIF1A/IFNG/ISCU/PRKAA1/SLC2A6/STAT3/TP53	9
BP	GO:0022612	gland morphogenesis	6/172	123/18800	0.000944539	0.00503641	0.00282842	CAV1/FBXW7/IL6/PML/SRC/TNFAIP3	6
BP	GO:0032355	response to estradiol	6/172	123/18800	0.000944539	0.00503641	0.00282842	GPX4/HSF1/NQO1/PTGS2/STAT3/TXNIP	6
BP	GO:0070661	leukocyte proliferation	10/172	330/18800	0.000945779	0.00503641	0.00282842	ATM/CDKN1A/FLT3/HELLS/IL6/MAPK1/MAPK3/TLR4/TNFAIP3/TP53	10
BP	GO:0070374	positive regulation of ERK1 and ERK2 cascade	8/172	220/18800	0.000966959	0.00514177	0.00288758	ALOX15/CD44/FBXW7/HRAS/JUN/MAPK3/SRC/TLR4	8
BP	GO:0002688	regulation of leukocyte chemotaxis	6/172	124/18800	0.000985165	0.00523103	0.00293771	DPP4/DUSP1/IL6/MAPK1/MAPK3/OXSR1	6
BP	GO:0010042	response to manganese ion	3/172	22/18800	0.00101969	0.00534504	0.00300174	ATF4/HSPA5/PTGS2	3
BP	GO:0031065	positive regulation of histone deacetylation	3/172	22/18800	0.00101969	0.00534504	0.00300174	JDP2/SIRT1/TP53	3
BP	GO:0032700	negative regulation of interleukin-17 production	3/172	22/18800	0.00101969	0.00534504	0.00300174	DDIT3/IFNG/TLR4	3
BP	GO:0034755	iron ion transmembrane transport	3/172	22/18800	0.00101969	0.00534504	0.00300174	IFNG/ISCU/SLC40A1	3
BP	GO:0044346	fibroblast apoptotic process	3/172	22/18800	0.00101969	0.00534504	0.00300174	BID/PIK3CA/TP53	3
BP	GO:0072574	hepatocyte proliferation	3/172	22/18800	0.00101969	0.00534504	0.00300174	FBXW7/IL6/TNFAIP3	3
BP	GO:0072575	epithelial cell proliferation involved in liver morphogenesis	3/172	22/18800	0.00101969	0.00534504	0.00300174	FBXW7/IL6/TNFAIP3	3
BP	GO:0090335	regulation of brown fat cell differentiation	3/172	22/18800	0.00101969	0.00534504	0.00300174	MAPK14/PTGS2/SIRT1	3
BP	GO:1903798	regulation of production of miRNAs involved in gene silencing by miRNA	3/172	22/18800	0.00101969	0.00534504	0.00300174	IL6/RIPK1/TP53	3
BP	GO:0070585	protein localization to mitochondrion	6/172	125/18800	0.00102712	0.00537311	0.00301751	BAP1/BID/DDIT3/FBXW7/MAPK8/PRKAA1	6
BP	GO:0052547	regulation of peptidase activity	12/172	456/18800	0.00102796	0.00537311	0.00301751	BID/CAV1/CD44/DNAJB6/HSF1/MAP3K5/PEBP1/PML/PTGS2/SIRT1/SRC/STAT3	12
BP	GO:0010656	negative regulation of muscle cell apoptotic process	4/172	49/18800	0.00103997	0.00540165	0.00303353	ALOX12/HMOX1/HSF1/NFE2L2	4
BP	GO:0046850	regulation of bone remodeling	4/172	49/18800	0.00103997	0.00540165	0.00303353	IL6/SRC/TF/TNFAIP3	4
BP	GO:0050873	brown fat cell differentiation	4/172	49/18800	0.00103997	0.00540165	0.00303353	BNIP3/MAPK14/PTGS2/SIRT1	4
BP	GO:0097300	programmed necrotic cell death	4/172	49/18800	0.00103997	0.00540165	0.00303353	CAV1/MAP3K5/RIPK1/TP53	4
BP	GO:0031397	negative regulation of protein ubiquitination	5/172	84/18800	0.00104222	0.00540165	0.00303353	ATG5/CAV1/GCLC/SQSTM1/TNFAIP3	5
BP	GO:1900182	positive regulation of protein localization to nucleus	5/172	84/18800	0.00104222	0.00540165	0.00303353	IFNG/MAPK14/PTGS2/SESN2/SRC	5
BP	GO:0050870	positive regulation of T cell activation	8/172	223/18800	0.00105493	0.00545987	0.00306623	CAV1/DPP4/IFNG/IL6/MYB/PIK3CA/SOCS1/SRC	8
BP	GO:0055088	lipid homeostasis	7/172	173/18800	0.00108364	0.00560059	0.00314526	CAV1/FBXW7/GOT1/HNF4A/PRKAA1/SESN2/SIRT1	7
BP	GO:0002269	leukocyte activation involved in inflammatory response	4/172	50/18800	0.00112241	0.00576861	0.00323962	ATM/IFNG/IL6/JUN	4
BP	GO:0031281	positive regulation of cyclase activity	4/172	50/18800	0.00112241	0.00576861	0.00323962	MAPK14/MAPK3/MAPK8/NOS2	4
BP	GO:0070231	T cell apoptotic process	4/172	50/18800	0.00112241	0.00576861	0.00323962	HIF1A/RIPK1/TP53/TSC22D3	4
BP	GO:1903747	regulation of establishment of protein localization to mitochondrion	4/172	50/18800	0.00112241	0.00576861	0.00323962	BAP1/FBXW7/MAPK8/PRKAA1	4
BP	GO:0006790	sulfur compound metabolic process	10/172	339/18800	0.00115832	0.00592858	0.00332946	ACSL3/ACSL4/CBS/CDO1/GCLC/GPX4/ISCU/NFE2L2/NFS1/SP1	10
BP	GO:0007254	JNK cascade	7/172	175/18800	0.00115839	0.00592858	0.00332946	HRAS/MAP3K5/MAPK8/MAPK9/NOX1/RIPK1/TLR4	7
BP	GO:0034103	regulation of tissue remodeling	5/172	86/18800	0.00115862	0.00592858	0.00332946	IL6/SRC/TF/TNFAIP3/TP53	5
BP	GO:0032042	mitochondrial DNA metabolic process	3/172	23/18800	0.0011648	0.00592858	0.00332946	LONP1/SESN2/TP53	3
BP	GO:0070920	regulation of production of small RNA involved in gene silencing by RNA	3/172	23/18800	0.0011648	0.00592858	0.00332946	IL6/RIPK1/TP53	3
BP	GO:0072576	liver morphogenesis	3/172	23/18800	0.0011648	0.00592858	0.00332946	FBXW7/IL6/TNFAIP3	3
BP	GO:1902254	negative regulation of intrinsic apoptotic signaling pathway by p53 class mediator	3/172	23/18800	0.0011648	0.00592858	0.00332946	CD44/MUC1/SIRT1	3
BP	GO:0035601	protein deacylation	6/172	129/18800	0.00120884	0.0061383	0.00344723	IFNG/JDP2/MAPK8/PRKAA1/SIRT1/TP53	6
BP	GO:0015804	neutral amino acid transport	4/172	51/18800	0.00120934	0.0061383	0.00344723	RGS4/SLC1A5/SLC38A1/SLC7A5	4
BP	GO:1902105	regulation of leukocyte differentiation	9/172	283/18800	0.00121336	0.00615025	0.00345394	FANCD2/FBXW7/HSF1/IFNG/MYB/RB1/RIPK1/SOCS1/TLR4	9
BP	GO:0002366	leukocyte activation involved in immune response	9/172	285/18800	0.00127407	0.00644912	0.00362179	EIF2AK4/HMOX1/IFNG/IL6/MYB/SNX4/STAT3/TLR4/TP53	9
BP	GO:0060759	regulation of response to cytokine stimulus	7/172	178/18800	0.00127802	0.00646023	0.00362803	CAV1/HIF1A/IL6/RIPK1/SOCS1/TLR4/TNFAIP3	7
BP	GO:0010594	regulation of endothelial cell migration	8/172	230/18800	0.00128523	0.00648775	0.00364348	FBXW7/HIF1A/HMOX1/HSPB1/NFE2L2/PTGS2/SIRT1/SP1	8
BP	GO:1903037	regulation of leukocyte cell-cell adhesion	10/172	344/18800	0.00129234	0.00651472	0.00365863	CAV1/CD44/DPP4/IFNG/IL6/MYB/PIK3CA/RELA/SOCS1/SRC	10
BP	GO:0032206	positive regulation of telomere maintenance	4/172	52/18800	0.00130087	0.00652202	0.00366273	ATM/MAPK1/MAPK3/PML	4
BP	GO:0035196	production of miRNAs involved in gene silencing by miRNA	4/172	52/18800	0.00130087	0.00652202	0.00366273	IL6/RIPK1/STAT3/TP53	4
BP	GO:0043392	negative regulation of DNA binding	4/172	52/18800	0.00130087	0.00652202	0.00366273	DDIT3/FBXW7/HMOX1/JUN	4
BP	GO:2000677	regulation of transcription regulatory region DNA binding	4/172	52/18800	0.00130087	0.00652202	0.00366273	DDIT3/FBXW7/IFNG/RB1	4
BP	GO:0044403	biological process involved in symbiotic interaction	9/172	286/18800	0.00130534	0.00653556	0.00367033	ATG7/CAV1/CHMP5/CHMP6/EIF2AK4/JUN/SLC1A5/SP1/SRC	9
BP	GO:0045649	regulation of macrophage differentiation	3/172	24/18800	0.0013223	0.00659361	0.00370293	HSF1/RB1/RIPK1	3
BP	GO:0070935	3'-UTR-mediated mRNA stabilization	3/172	24/18800	0.0013223	0.00659361	0.00370293	ELAVL1/MAPK14/ZFP36	3
BP	GO:2000209	regulation of anoikis	3/172	24/18800	0.0013223	0.00659361	0.00370293	CAV1/PIK3CA/SRC	3
BP	GO:0002274	myeloid leukocyte activation	8/172	232/18800	0.00135789	0.00676192	0.00379746	ATM/HMOX1/IFNG/IL6/JUN/MT1G/SNX4/TLR4	8
BP	GO:1900180	regulation of protein localization to nucleus	6/172	132/18800	0.00136054	0.006766	0.00379975	IFNG/MAPK14/NF2/PTGS2/SESN2/SRC	6
BP	GO:0051052	regulation of DNA metabolic process	12/172	472/18800	0.00137835	0.0068453	0.00384428	ATM/CDKN1A/HSF1/IL6/LPIN1/MAPK1/MAPK3/PIK3CA/PML/SIRT1/SRC/TP53	12
BP	GO:0032210	regulation of telomere maintenance via telomerase	4/172	53/18800	0.00139713	0.00691062	0.00388096	ATM/MAPK1/MAPK3/SRC	4
BP	GO:0071385	cellular response to glucocorticoid stimulus	4/172	53/18800	0.00139713	0.00691062	0.00388096	DDIT4/FLT3/PCK2/ZFP36	4
BP	GO:1902743	regulation of lamellipodium organization	4/172	53/18800	0.00139713	0.00691062	0.00388096	CD44/ENPP2/PIK3CA/SRC	4
BP	GO:0002263	cell activation involved in immune response	9/172	289/18800	0.00140286	0.00692042	0.00388647	EIF2AK4/HMOX1/IFNG/IL6/MYB/SNX4/STAT3/TLR4/TP53	9
BP	GO:0031349	positive regulation of defense response	9/172	289/18800	0.00140286	0.00692042	0.00388647	ABCC1/IFNG/IL6/MAPK3/PTGS2/RIPK1/SNX4/SRC/TLR4	9
BP	GO:0061041	regulation of wound healing	6/172	133/18800	0.00141421	0.00695777	0.00390744	ALOX12/CAV1/DUOX1/HRAS/NFE2L2/TNFAIP3	6
BP	GO:0098732	macromolecule deacylation	6/172	133/18800	0.00141421	0.00695777	0.00390744	IFNG/JDP2/MAPK8/PRKAA1/SIRT1/TP53	6
BP	GO:0045930	negative regulation of mitotic cell cycle	8/172	234/18800	0.00143379	0.00704467	0.00395625	ATM/CDKN1A/DUSP1/FANCD2/MUC1/PML/RB1/TP53	8
BP	GO:0014074	response to purine-containing compound	6/172	134/18800	0.00146948	0.0072087	0.00404836	CDO1/DUOX1/HSPA5/PANX1/PRKAA1/PTGS2	6
BP	GO:0042063	gliogenesis	9/172	291/18800	0.00147108	0.0072087	0.00404836	BNIP3/IFNG/IL6/KRAS/MAPK1/MAPK3/NF2/STAT3/TLR4	9
BP	GO:0034765	regulation of ion transmembrane transport	12/172	476/18800	0.0014799	0.0072423	0.00406723	ATG5/CAV1/CYBB/DRD4/IFNG/ISCU/KLHL24/NOX1/OXSR1/RGS4/RIPK1/YWHAE	12
BP	GO:1903351	cellular response to dopamine	5/172	91/18800	0.00149154	0.00726568	0.00408036	ATF4/DRD4/MAPK1/MAPK3/RGS4	5
BP	GO:0060333	interferon-gamma-mediated signaling pathway	3/172	25/18800	0.00149257	0.00726568	0.00408036	IFNG/SOCS1/TP53	3
BP	GO:0070423	nucleotide-binding oligomerization domain containing signaling pathway	3/172	25/18800	0.00149257	0.00726568	0.00408036	RELA/TLR4/TNFAIP3	3
BP	GO:1902993	positive regulation of amyloid precursor protein catabolic process	3/172	25/18800	0.00149257	0.00726568	0.00408036	IFNG/RELA/SP1	3
BP	GO:0061900	glial cell activation	4/172	54/18800	0.00149825	0.00727631	0.00408633	ATM/IFNG/IL6/JUN	4
BP	GO:1901991	negative regulation of mitotic cell cycle phase transition	7/172	183/18800	0.0014987	0.00727631	0.00408633	ATM/CDKN1A/DUSP1/MUC1/PML/RB1/TP53	7
BP	GO:0030879	mammary gland development	6/172	135/18800	0.00152638	0.00740093	0.00415631	CAV1/CDO1/HIF1A/MAPK1/PML/SRC	6
BP	GO:0002697	regulation of immune effector process	10/172	353/18800	0.00156536	0.00757198	0.00425238	ATG5/HMOX1/IFNG/IL6/MYB/NOS2/SIRT1/SLC7A5/SNX4/TLR4	10
BP	GO:1903350	response to dopamine	5/172	92/18800	0.00156577	0.00757198	0.00425238	ATF4/DRD4/MAPK1/MAPK3/RGS4	5
BP	GO:0002763	positive regulation of myeloid leukocyte differentiation	4/172	55/18800	0.00160436	0.00773831	0.00434579	HSF1/IFNG/RB1/RIPK1	4
BP	GO:0042743	hydrogen peroxide metabolic process	4/172	55/18800	0.00160436	0.00773831	0.00434579	CYBB/DUOX1/NOX1/PRDX1	4
BP	GO:0035872	nucleotide-binding domain, leucine rich repeat containing receptor signaling pathway	3/172	26/18800	0.00167598	0.00804165	0.00451614	RELA/TLR4/TNFAIP3	3
BP	GO:0045324	late endosome to vacuole transport	3/172	26/18800	0.00167598	0.00804165	0.00451614	BECN1/CHMP5/CHMP6	3
BP	GO:0090200	positive regulation of release of cytochrome c from mitochondria	3/172	26/18800	0.00167598	0.00804165	0.00451614	BID/BNIP3/TP53	3
BP	GO:1904353	regulation of telomere capping	3/172	26/18800	0.00167598	0.00804165	0.00451614	ATM/MAPK1/MAPK3	3
BP	GO:0009060	aerobic respiration	7/172	187/18800	0.00169578	0.00812605	0.00456354	ACO1/BID/BNIP3/CS/FH/HIF1A/ISCU	7
BP	GO:0070918	primary sncRNA processing	4/172	56/18800	0.00171559	0.00821032	0.00461087	IL6/RIPK1/STAT3/TP53	4
BP	GO:0031099	regeneration	7/172	188/18800	0.00174806	0.00834403	0.00468595	AURKA/CDKN1A/FLT3/HMOX1/IL6/JUN/LPIN1	7
BP	GO:0098739	import across plasma membrane	7/172	188/18800	0.00174806	0.00834403	0.00468595	IFNG/ISCU/RGS4/SLC1A5/SLC2A1/SLC2A3/SLC7A5	7
BP	GO:0002696	positive regulation of leukocyte activation	11/172	421/18800	0.00175412	0.00836215	0.00469613	CAV1/CDKN1A/DPP4/IFNG/IL6/MYB/PIK3CA/SNX4/SOCS1/SRC/TLR4	11
BP	GO:1901379	regulation of potassium ion transmembrane transport	5/172	95/18800	0.00180476	0.00859245	0.00482547	CAV1/KLHL24/OXSR1/RGS4/YWHAE	5
BP	GO:0051047	positive regulation of secretion	9/172	300/18800	0.0018119	0.0086153	0.0048383	ACSL3/ACSL4/ATG5/HIF1A/IFNG/PCK2/SNX4/TFR2/TLR4	9
BP	GO:0032768	regulation of monooxygenase activity	4/172	57/18800	0.00183206	0.00867605	0.00487242	CAV1/GCH1/HIF1A/IFNG	4
BP	GO:0038066	p38MAPK cascade	4/172	57/18800	0.00183206	0.00867605	0.00487242	DUSP1/MAP3K5/MAPK14/ZFP36	4
BP	GO:0034341	response to interferon-gamma	6/172	140/18800	0.00183645	0.00867605	0.00487242	GCH1/IFNG/NOS2/SOCS1/TLR4/TP53	6
BP	GO:0042157	lipoprotein metabolic process	6/172	140/18800	0.00183645	0.00867605	0.00487242	ATG16L1/ATG5/ATG7/ATM/WIPI1/WIPI2	6
BP	GO:1903322	positive regulation of protein modification by small protein conjugation or removal	6/172	140/18800	0.00183645	0.00867605	0.00487242	ARRDC3/CAV1/FBXW7/HSPA5/MAPK9/TRIB3	6
BP	GO:0043433	negative regulation of DNA-binding transcription factor activity	7/172	190/18800	0.00185637	0.00875894	0.00491897	DDIT3/EIF2AK4/HMOX1/KEAP1/RB1/SIRT1/TNFAIP3	7
BP	GO:0009065	glutamine family amino acid catabolic process	3/172	27/18800	0.00187289	0.00881429	0.00495005	GLS2/GOT1/NOS2	3
BP	GO:0046426	negative regulation of receptor signaling pathway via JAK-STAT	3/172	27/18800	0.00187289	0.00881429	0.00495005	CAV1/NF2/SOCS1	3
BP	GO:0006497	protein lipidation	5/172	96/18800	0.00189006	0.00886117	0.00497638	ATG16L1/ATG5/ATG7/WIPI1/WIPI2	5
BP	GO:0032091	negative regulation of protein binding	5/172	96/18800	0.00189006	0.00886117	0.00497638	AURKA/CAV1/CDKN1A/MAPK3/MAPK8	5
BP	GO:0046330	positive regulation of JNK cascade	5/172	96/18800	0.00189006	0.00886117	0.00497638	HRAS/MAP3K5/NOX1/RIPK1/TLR4	5
BP	GO:0034763	negative regulation of transmembrane transport	6/172	141/18800	0.0019038	0.00890294	0.00499984	CAV1/DRD4/ISCU/OXSR1/RGS4/YWHAE	6
BP	GO:0070555	response to interleukin-1	6/172	141/18800	0.0019038	0.00890294	0.00499984	GCLC/HIF1A/IL6/MAPK3/RELA/SRC	6
BP	GO:0052548	regulation of endopeptidase activity	11/172	426/18800	0.0019239	0.00898552	0.00504621	BID/CD44/DNAJB6/HSF1/MAP3K5/PEBP1/PML/PTGS2/SIRT1/SRC/STAT3	11
BP	GO:0045604	regulation of epidermal cell differentiation	4/172	58/18800	0.0019539	0.00909105	0.00510548	ALOX15B/KEAP1/MAFG/ZFP36	4
BP	GO:0048010	vascular endothelial growth factor receptor signaling pathway	4/172	58/18800	0.0019539	0.00909105	0.00510548	HIF1A/HSPB1/MAPK14/SRC	4
BP	GO:0050732	negative regulation of peptidyl-tyrosine phosphorylation	4/172	58/18800	0.0019539	0.00909105	0.00510548	CAV1/CHMP6/NF2/SOCS1	4
BP	GO:0010952	positive regulation of peptidase activity	7/172	192/18800	0.00196983	0.00915362	0.00514062	BID/CAV1/HSF1/MAP3K5/PML/SIRT1/STAT3	7
BP	GO:0032755	positive regulation of interleukin-6 production	5/172	97/18800	0.00197828	0.0091813	0.00515616	IFNG/IL6/NOS2/STAT3/TLR4	5
BP	GO:0035065	regulation of histone acetylation	4/172	59/18800	0.00208123	0.00960974	0.00539677	ATG5/MAPK3/MUC1/SIRT1	4
BP	GO:0071384	cellular response to corticosteroid stimulus	4/172	59/18800	0.00208123	0.00960974	0.00539677	DDIT4/FLT3/PCK2/ZFP36	4
BP	GO:0002360	T cell lineage commitment	3/172	28/18800	0.00208363	0.00960974	0.00539677	IL6/STAT3/TP53	3
BP	GO:1901798	positive regulation of signal transduction by p53 class mediator	3/172	28/18800	0.00208363	0.00960974	0.00539677	ATM/HIC1/PML	3
BP	GO:1903649	regulation of cytoplasmic transport	3/172	28/18800	0.00208363	0.00960974	0.00539677	MAPK1/MAPK3/SRC	3
BP	GO:0071897	DNA biosynthetic process	7/172	194/18800	0.00208859	0.00962056	0.00540285	ATM/CDKN1A/MAPK1/MAPK3/SIRT1/SRC/TP53	7
BP	GO:0051592	response to calcium ion	6/172	144/18800	0.00211713	0.00973983	0.00546983	ALOX15/CAV1/HSPA5/JUN/PRKAA1/TXNIP	6
BP	GO:0006650	glycerophospholipid metabolic process	9/172	309/18800	0.00221328	0.010161	0.00570634	ACSL3/ALOX15/ATM/BECN1/ENPP2/LPIN1/PIK3CA/PRDX6/SOCS1	9
BP	GO:0046824	positive regulation of nucleocytoplasmic transport	4/172	60/18800	0.00221418	0.010161	0.00570634	IFNG/MAPK14/PTGS2/YWHAE	4
BP	GO:0051251	positive regulation of lymphocyte activation	10/172	371/18800	0.00225212	0.0103222	0.0057969	CAV1/CDKN1A/DPP4/IFNG/IL6/MYB/PIK3CA/SOCS1/SRC/TLR4	10
BP	GO:0019080	viral gene expression	5/172	100/18800	0.00226099	0.0103414	0.00580769	ATG5/EIF2AK4/JUN/SP1/ZFP36	5
BP	GO:0006909	phagocytosis	9/172	310/18800	0.00226193	0.0103414	0.00580769	ALOX15/ATG3/ATG5/BECN1/IFNG/NCF2/PIK3CA/SRC/TLR4	9
BP	GO:0050867	positive regulation of cell activation	11/172	436/18800	0.00230374	0.0105024	0.00589811	CAV1/CDKN1A/DPP4/IFNG/IL6/MYB/PIK3CA/SNX4/SOCS1/SRC/TLR4	11
BP	GO:0019674	NAD metabolic process	3/172	29/18800	0.00230854	0.0105024	0.00589811	NQO1/PCK2/TP53	3
BP	GO:0061082	myeloid leukocyte cytokine production	3/172	29/18800	0.00230854	0.0105024	0.00589811	HMOX1/SIRT1/TLR4	3
BP	GO:0097421	liver regeneration	3/172	29/18800	0.00230854	0.0105024	0.00589811	AURKA/HMOX1/IL6	3
BP	GO:0070372	regulation of ERK1 and ERK2 cascade	9/172	311/18800	0.00231143	0.0105026	0.00589819	ALOX15/ATF3/CD44/FBXW7/HRAS/JUN/MAPK3/SRC/TLR4	9
BP	GO:0048167	regulation of synaptic plasticity	7/172	198/18800	0.00234268	0.0106315	0.00597058	ATF4/EIF2AK4/HRAS/KRAS/MAPK1/PTGS2/SQSTM1	7
BP	GO:0001890	placenta development	6/172	147/18800	0.00234803	0.0106385	0.0059745	DNAJB6/EPAS1/HIF1A/MAPK1/MAPK14/PTGS2	6
BP	GO:0045428	regulation of nitric oxide biosynthetic process	4/172	61/18800	0.00235288	0.0106385	0.0059745	CAV1/IFNG/PTGS2/TLR4	4
BP	GO:1904356	regulation of telomere maintenance via telomere lengthening	4/172	61/18800	0.00235288	0.0106385	0.0059745	ATM/MAPK1/MAPK3/SRC	4
BP	GO:0042158	lipoprotein biosynthetic process	5/172	101/18800	0.00236144	0.0106641	0.0059889	ATG16L1/ATG5/ATG7/WIPI1/WIPI2	5
BP	GO:0035710	CD4-positive, alpha-beta T cell activation	5/172	102/18800	0.00246511	0.011105	0.00623653	IFNG/IL6/MYB/SOCS1/STAT3	5
BP	GO:0062014	negative regulation of small molecule metabolic process	5/172	102/18800	0.00246511	0.011105	0.00623653	DDIT4/SIRT1/STAT3/TP53/TRIB3	5
BP	GO:0006734	NADH metabolic process	3/172	30/18800	0.00254794	0.0114244	0.0064159	NQO1/PCK2/TP53	3
BP	GO:0070498	interleukin-1-mediated signaling pathway	3/172	30/18800	0.00254794	0.0114244	0.0064159	IL6/MAPK3/RELA	3
BP	GO:1903579	negative regulation of ATP metabolic process	3/172	30/18800	0.00254794	0.0114244	0.0064159	DDIT4/STAT3/TP53	3
BP	GO:0002285	lymphocyte activation involved in immune response	7/172	201/18800	0.00254841	0.0114244	0.0064159	EIF2AK4/IFNG/IL6/MYB/STAT3/TLR4/TP53	7
BP	GO:0006641	triglyceride metabolic process	5/172	103/18800	0.00257204	0.0114932	0.00645453	CAV1/FBXW7/LPIN1/PCK2/SIRT1	5
BP	GO:1905477	positive regulation of protein localization to membrane	5/172	103/18800	0.00257204	0.0114932	0.00645453	ACSL3/HRAS/IFNG/MAPK8/SQSTM1	5
BP	GO:0003015	heart process	8/172	257/18800	0.00257311	0.0114932	0.00645453	ATG5/CAV1/EPAS1/GCH1/PIK3CA/RGS4/SRC/YWHAE	8
BP	GO:0032615	interleukin-12 production	4/172	63/18800	0.00264799	0.0117706	0.0066103	IFNG/MAPK14/RELA/TLR4	4
BP	GO:0032655	regulation of interleukin-12 production	4/172	63/18800	0.00264799	0.0117706	0.0066103	IFNG/MAPK14/RELA/TLR4	4
BP	GO:0045453	bone resorption	4/172	63/18800	0.00264799	0.0117706	0.0066103	IL6/SRC/TF/TNFAIP3	4
BP	GO:0070542	response to fatty acid	4/172	63/18800	0.00264799	0.0117706	0.0066103	PIK3CA/PTGS2/SCD/SRC	4
BP	GO:0015849	organic acid transport	9/172	318/18800	0.00268257	0.01191	0.00668856	ABCC1/ACSL3/DRD4/PRKAA1/RGS4/SLC1A5/SLC2A1/SLC38A1/SLC7A5	9
BP	GO:0007159	leukocyte cell-cell adhesion	10/172	381/18800	0.00272764	0.0120955	0.00679275	CAV1/CD44/DPP4/IFNG/IL6/MYB/PIK3CA/RELA/SOCS1/SRC	10
BP	GO:0061448	connective tissue development	8/172	260/18800	0.00276293	0.0122309	0.00686881	ARRDC3/CD44/HIF1A/MAPK14/MAPK3/PIK3CA/RB1/SIRT1	8
BP	GO:1905039	carboxylic acid transmembrane transport	6/172	152/18800	0.00277438	0.0122309	0.00686881	ABCC1/RGS4/SLC1A5/SLC2A1/SLC38A1/SLC7A5	6
BP	GO:0030098	lymphocyte differentiation	10/172	382/18800	0.00277931	0.0122309	0.00686881	ATG5/ATM/FANCD2/FLT3/IFNG/IL6/MYB/SOCS1/STAT3/TP53	10
BP	GO:0002027	regulation of heart rate	5/172	105/18800	0.00279595	0.0122309	0.00686881	CAV1/EPAS1/GCH1/RGS4/YWHAE	5
BP	GO:0045833	negative regulation of lipid metabolic process	5/172	105/18800	0.00279595	0.0122309	0.00686881	FBXW7/LPIN1/PRKAA1/SIRT1/TRIB3	5
BP	GO:0046425	regulation of receptor signaling pathway via JAK-STAT	5/172	105/18800	0.00279595	0.0122309	0.00686881	CAV1/IFNG/IL6/NF2/SOCS1	5
BP	GO:0071868	cellular response to monoamine stimulus	5/172	105/18800	0.00279595	0.0122309	0.00686881	ATF4/DRD4/MAPK1/MAPK3/RGS4	5
BP	GO:0071870	cellular response to catecholamine stimulus	5/172	105/18800	0.00279595	0.0122309	0.00686881	ATF4/DRD4/MAPK1/MAPK3/RGS4	5
BP	GO:0000002	mitochondrial genome maintenance	3/172	31/18800	0.00280213	0.0122309	0.00686881	LONP1/SESN2/TP53	3
BP	GO:0006099	tricarboxylic acid cycle	3/172	31/18800	0.00280213	0.0122309	0.00686881	ACO1/CS/FH	3
BP	GO:0034390	smooth muscle cell apoptotic process	3/172	31/18800	0.00280213	0.0122309	0.00686881	ATF4/IFNG/SIRT1	3
BP	GO:0034391	regulation of smooth muscle cell apoptotic process	3/172	31/18800	0.00280213	0.0122309	0.00686881	ATF4/IFNG/SIRT1	3
BP	GO:0062098	regulation of programmed necrotic cell death	3/172	31/18800	0.00280213	0.0122309	0.00686881	CAV1/RIPK1/TP53	3
BP	GO:0080164	regulation of nitric oxide metabolic process	4/172	64/18800	0.00280465	0.0122309	0.00686881	CAV1/IFNG/PTGS2/TLR4	4
BP	GO:0000819	sister chromatid segregation	7/172	205/18800	0.00284403	0.012388	0.00695703	ATM/BECN1/CHMP5/CHMP6/DUSP1/FBXW7/RB1	7
BP	GO:0045834	positive regulation of lipid metabolic process	6/172	153/18800	0.00286618	0.0124551	0.00699469	ACSL3/FLT3/IFNG/PRKAA1/PTGS2/SRC	6
BP	GO:1903825	organic acid transmembrane transport	6/172	153/18800	0.00286618	0.0124551	0.00699469	ABCC1/RGS4/SLC1A5/SLC2A1/SLC38A1/SLC7A5	6
BP	GO:0042116	macrophage activation	5/172	106/18800	0.00291304	0.0126438	0.00710066	ATM/IFNG/IL6/JUN/TLR4	5
BP	GO:0001678	cellular glucose homeostasis	6/172	154/18800	0.00296024	0.0128049	0.00719115	GCLC/HIF1A/PCK2/PIK3CA/PRKAA1/SIRT1	6
BP	GO:0051092	positive regulation of NF-kappaB transcription factor activity	6/172	154/18800	0.00296024	0.0128049	0.00719115	CAV1/MTDH/RELA/RIPK1/STAT3/TLR4	6
BP	GO:0030217	T cell differentiation	8/172	263/18800	0.00296352	0.0128049	0.00719115	ATG5/FANCD2/IFNG/IL6/MYB/SOCS1/STAT3/TP53	8
BP	GO:0002260	lymphocyte homeostasis	4/172	65/18800	0.00296754	0.0128049	0.00719115	HIF1A/SLC40A1/TNFAIP3/TSC22D3	4
BP	GO:0045682	regulation of epidermis development	4/172	65/18800	0.00296754	0.0128049	0.00719115	ALOX15B/KEAP1/MAFG/ZFP36	4
BP	GO:0007519	skeletal muscle tissue development	6/172	155/18800	0.00305659	0.0131148	0.00736522	ARNTL/ATF3/CAV1/MAPK14/PRKAA1/RB1	6
BP	GO:0044839	cell cycle G2/M phase transition	6/172	155/18800	0.00305659	0.0131148	0.00736522	ATM/AURKA/BACH1/BRD4/CDKN1A/TP53	6
BP	GO:0006308	DNA catabolic process	3/172	32/18800	0.0030714	0.0131148	0.00736522	ATM/HSF1/IL6	3
BP	GO:0032770	positive regulation of monooxygenase activity	3/172	32/18800	0.0030714	0.0131148	0.00736522	GCH1/HIF1A/IFNG	3
BP	GO:0043372	positive regulation of CD4-positive, alpha-beta T cell differentiation	3/172	32/18800	0.0030714	0.0131148	0.00736522	IFNG/MYB/SOCS1	3
BP	GO:0051443	positive regulation of ubiquitin-protein transferase activity	3/172	32/18800	0.0030714	0.0131148	0.00736522	ARRDC3/FBXW7/TRIB3	3
BP	GO:0071353	cellular response to interleukin-4	3/172	32/18800	0.0030714	0.0131148	0.00736522	HSPA5/KEAP1/PML	3
BP	GO:1901380	negative regulation of potassium ion transmembrane transport	3/172	32/18800	0.0030714	0.0131148	0.00736522	CAV1/OXSR1/RGS4	3
BP	GO:1903955	positive regulation of protein targeting to mitochondrion	3/172	32/18800	0.0030714	0.0131148	0.00736522	BAP1/FBXW7/PRKAA1	3
BP	GO:0050435	amyloid-beta metabolic process	4/172	66/18800	0.00313678	0.013363	0.0075046	BECN1/IFNG/RELA/SP1	4
BP	GO:1900076	regulation of cellular response to insulin stimulus	4/172	66/18800	0.00313678	0.013363	0.0075046	PRKAA1/SIRT1/SOCS1/SRC	4
BP	GO:0071867	response to monoamine	5/172	108/18800	0.00315779	0.0134061	0.00752877	ATF4/DRD4/MAPK1/MAPK3/RGS4	5
BP	GO:0071869	response to catecholamine	5/172	108/18800	0.00315779	0.0134061	0.00752877	ATF4/DRD4/MAPK1/MAPK3/RGS4	5
BP	GO:1902749	regulation of cell cycle G2/M phase transition	5/172	108/18800	0.00315779	0.0134061	0.00752877	ATM/AURKA/BRD4/CDKN1A/TP53	5
BP	GO:0030856	regulation of epithelial cell differentiation	6/172	157/18800	0.0032563	0.0137767	0.00773689	ALOX15B/CAV1/IFNG/KEAP1/MAFG/ZFP36	6
BP	GO:1902107	positive regulation of leukocyte differentiation	6/172	157/18800	0.0032563	0.0137767	0.00773689	HSF1/IFNG/MYB/RB1/RIPK1/SOCS1	6
BP	GO:1903708	positive regulation of hemopoiesis	6/172	157/18800	0.0032563	0.0137767	0.00773689	HSF1/IFNG/MYB/RB1/RIPK1/SOCS1	6
BP	GO:0002294	CD4-positive, alpha-beta T cell differentiation involved in immune response	4/172	67/18800	0.00331249	0.0139503	0.0078344	IFNG/IL6/MYB/STAT3	4
BP	GO:0042531	positive regulation of tyrosine phosphorylation of STAT protein	4/172	67/18800	0.00331249	0.0139503	0.0078344	FLT3/HSF1/IFNG/IL6	4
BP	GO:1901016	regulation of potassium ion transmembrane transporter activity	4/172	67/18800	0.00331249	0.0139503	0.0078344	CAV1/KLHL24/OXSR1/YWHAE	4
BP	GO:1902475	L-alpha-amino acid transmembrane transport	4/172	67/18800	0.00331249	0.0139503	0.0078344	RGS4/SLC1A5/SLC38A1/SLC7A5	4
BP	GO:0018205	peptidyl-lysine modification	10/172	392/18800	0.00334034	0.0140515	0.00789126	ATG5/BRD4/MAPK3/MUC1/MYB/PML/PRKAA1/RELA/SETD1B/SIRT1	10
BP	GO:0000096	sulfur amino acid metabolic process	3/172	33/18800	0.00335604	0.0140689	0.00790099	CBS/CDO1/GCLC	3
BP	GO:0045589	regulation of regulatory T cell differentiation	3/172	33/18800	0.00335604	0.0140689	0.00790099	FANCD2/IFNG/SOCS1	3
BP	GO:1903715	regulation of aerobic respiration	3/172	33/18800	0.00335604	0.0140689	0.00790099	BNIP3/HIF1A/ISCU	3
BP	GO:0007292	female gamete generation	6/172	158/18800	0.00335973	0.0140689	0.00790099	ATM/AURKA/PANX1/PTGS2/SIRT1/SRC	6
BP	GO:0002287	alpha-beta T cell activation involved in immune response	4/172	68/18800	0.00349478	0.0145353	0.00816294	IFNG/IL6/MYB/STAT3	4
BP	GO:0002293	alpha-beta T cell differentiation involved in immune response	4/172	68/18800	0.00349478	0.0145353	0.00816294	IFNG/IL6/MYB/STAT3	4
BP	GO:0002720	positive regulation of cytokine production involved in immune response	4/172	68/18800	0.00349478	0.0145353	0.00816294	IL6/SIRT1/SLC7A5/TLR4	4
BP	GO:0046626	regulation of insulin receptor signaling pathway	4/172	68/18800	0.00349478	0.0145353	0.00816294	PRKAA1/SIRT1/SOCS1/SRC	4
BP	GO:0046854	phosphatidylinositol phosphate biosynthetic process	4/172	68/18800	0.00349478	0.0145353	0.00816294	ATM/BECN1/PIK3CA/SOCS1	4
BP	GO:0061180	mammary gland epithelium development	4/172	68/18800	0.00349478	0.0145353	0.00816294	HIF1A/MAPK1/PML/SRC	4
BP	GO:0046632	alpha-beta T cell differentiation	5/172	111/18800	0.00355225	0.0146436	0.00822377	IFNG/IL6/MYB/SOCS1/STAT3	5
BP	GO:0000098	sulfur amino acid catabolic process	2/172	10/18800	0.00356851	0.0146436	0.00822377	CBS/CDO1	2
BP	GO:0033483	gas homeostasis	2/172	10/18800	0.00356851	0.0146436	0.00822377	CAV1/HIF1A	2
BP	GO:0033572	transferrin transport	2/172	10/18800	0.00356851	0.0146436	0.00822377	STEAP3/TFR2	2
BP	GO:0043653	mitochondrial fragmentation involved in apoptotic process	2/172	10/18800	0.00356851	0.0146436	0.00822377	ATG3/BNIP3	2
BP	GO:0048102	autophagic cell death	2/172	10/18800	0.00356851	0.0146436	0.00822377	ATG7/BNIP3	2
BP	GO:0051974	negative regulation of telomerase activity	2/172	10/18800	0.00356851	0.0146436	0.00822377	SRC/TP53	2
BP	GO:0060439	trachea morphogenesis	2/172	10/18800	0.00356851	0.0146436	0.00822377	MAPK1/MAPK3	2
BP	GO:1902237	positive regulation of endoplasmic reticulum stress-induced intrinsic apoptotic signaling pathway	2/172	10/18800	0.00356851	0.0146436	0.00822377	DDIT3/SIRT1	2
BP	GO:1902510	regulation of apoptotic DNA fragmentation	2/172	10/18800	0.00356851	0.0146436	0.00822377	HSF1/IL6	2
BP	GO:2000121	regulation of removal of superoxide radicals	2/172	10/18800	0.00356851	0.0146436	0.00822377	GCH1/NFE2L2	2
BP	GO:2000434	regulation of protein neddylation	2/172	10/18800	0.00356851	0.0146436	0.00822377	EPAS1/HIF1A	2
BP	GO:0046474	glycerophospholipid biosynthetic process	7/172	214/18800	0.00360507	0.0147772	0.00829876	ACSL3/ALOX15/ATM/BECN1/LPIN1/PIK3CA/SOCS1	7
BP	GO:0006536	glutamate metabolic process	3/172	34/18800	0.00365631	0.014855	0.00834248	GCLC/GLS2/GOT1	3
BP	GO:0032212	positive regulation of telomere maintenance via telomerase	3/172	34/18800	0.00365631	0.014855	0.00834248	ATM/MAPK1/MAPK3	3
BP	GO:0034405	response to fluid shear stress	3/172	34/18800	0.00365631	0.014855	0.00834248	NFE2L2/PTGS2/SRC	3
BP	GO:0043276	anoikis	3/172	34/18800	0.00365631	0.014855	0.00834248	CAV1/PIK3CA/SRC	3
BP	GO:0070232	regulation of T cell apoptotic process	3/172	34/18800	0.00365631	0.014855	0.00834248	HIF1A/TP53/TSC22D3	3
BP	GO:0070670	response to interleukin-4	3/172	34/18800	0.00365631	0.014855	0.00834248	HSPA5/KEAP1/PML	3
BP	GO:1901797	negative regulation of signal transduction by p53 class mediator	3/172	34/18800	0.00365631	0.014855	0.00834248	CD44/MUC1/SIRT1	3
BP	GO:1904893	negative regulation of receptor signaling pathway via STAT	3/172	34/18800	0.00365631	0.014855	0.00834248	CAV1/NF2/SOCS1	3
BP	GO:0007004	telomere maintenance via telomerase	4/172	69/18800	0.00368378	0.0149173	0.00837746	ATM/MAPK1/MAPK3/SRC	4
BP	GO:0032922	circadian regulation of gene expression	4/172	69/18800	0.00368378	0.0149173	0.00837746	ARNTL/ATF4/PML/SIRT1	4
BP	GO:0043550	regulation of lipid kinase activity	4/172	69/18800	0.00368378	0.0149173	0.00837746	FLT3/RB1/SOCS1/SRC	4
BP	GO:0051051	negative regulation of transport	11/172	464/18800	0.00370081	0.0149698	0.00840696	ATF4/ATG3/ATG5/CAV1/DRD4/HMOX1/ISCU/OXSR1/PTGS2/RGS4/YWHAE	11
BP	GO:0006473	protein acetylation	7/172	216/18800	0.00379344	0.0152941	0.00858909	ARNTL/ATG5/MAPK3/MUC1/PML/PRKAA1/SIRT1	7
BP	GO:0030258	lipid modification	7/172	216/18800	0.00379344	0.0152941	0.00858909	ALOX12/ALOX15/ALOX15B/MAPK14/PRKAA1/SCP2/SESN2	7
BP	GO:0043491	protein kinase B signaling	7/172	216/18800	0.00379344	0.0152941	0.00858909	DDIT3/GDF15/MTDH/PIK3CA/SESN2/SIRT1/SRC	7
BP	GO:0002685	regulation of leukocyte migration	7/172	218/18800	0.00398921	0.0160658	0.00902248	DPP4/DUSP1/HMOX1/IL6/MAPK1/MAPK3/OXSR1	7
BP	GO:0031507	heterochromatin assembly	4/172	71/18800	0.00408235	0.0164051	0.009213	HELLS/PIK3CA/RB1/SIRT1	4
BP	GO:0051881	regulation of mitochondrial membrane potential	4/172	71/18800	0.00408235	0.0164051	0.009213	BID/BNIP3/GCLC/SRC	4
BP	GO:0018107	peptidyl-threonine phosphorylation	5/172	115/18800	0.00413169	0.0165672	0.00930404	ACVR1B/DDIT4/MAPK1/MAPK8/OXSR1	5
BP	GO:0030518	intracellular steroid hormone receptor signaling pathway	5/172	115/18800	0.00413169	0.0165672	0.00930404	ARNTL/EGLN2/NCOA4/SIRT1/SRC	5
BP	GO:0046942	carboxylic acid transport	8/172	279/18800	0.00423254	0.0169532	0.00952079	ABCC1/DRD4/NOS2/PRKAA1/RGS4/SLC1A5/SLC38A1/SLC7A5	8
BP	GO:0001959	regulation of cytokine-mediated signaling pathway	6/172	166/18800	0.00427753	0.0169775	0.00953447	CAV1/HIF1A/IL6/RIPK1/SOCS1/TNFAIP3	6
BP	GO:1903034	regulation of response to wounding	6/172	166/18800	0.00427753	0.0169775	0.00953447	ALOX12/CAV1/DUOX1/HRAS/NFE2L2/TNFAIP3	6
BP	GO:1904892	regulation of receptor signaling pathway via STAT	5/172	116/18800	0.00428649	0.0169775	0.00953447	CAV1/IFNG/IL6/NF2/SOCS1	5
BP	GO:0033045	regulation of sister chromatid segregation	4/172	72/18800	0.00429215	0.0169775	0.00953447	ATM/BECN1/DUSP1/RB1	4
BP	GO:0042789	mRNA transcription by RNA polymerase II	3/172	36/18800	0.00430478	0.0169775	0.00953447	ATF4/EPAS1/STAT3	3
BP	GO:0045066	regulatory T cell differentiation	3/172	36/18800	0.00430478	0.0169775	0.00953447	FANCD2/IFNG/SOCS1	3
BP	GO:1902745	positive regulation of lamellipodium organization	3/172	36/18800	0.00430478	0.0169775	0.00953447	ENPP2/PIK3CA/SRC	3
BP	GO:0050863	regulation of T cell activation	9/172	342/18800	0.00432639	0.0169775	0.00953447	CAV1/DPP4/FANCD2/IFNG/IL6/MYB/PIK3CA/SOCS1/SRC	9
BP	GO:0033210	leptin-mediated signaling pathway	2/172	11/18800	0.00433537	0.0169775	0.00953447	SIRT1/STAT3	2
BP	GO:0035404	histone-serine phosphorylation	2/172	11/18800	0.00433537	0.0169775	0.00953447	AURKA/PRKAA1	2
BP	GO:0036490	regulation of translation in response to endoplasmic reticulum stress	2/172	11/18800	0.00433537	0.0169775	0.00953447	EIF2AK4/SESN2	2
BP	GO:0042167	heme catabolic process	2/172	11/18800	0.00433537	0.0169775	0.00953447	ABCC1/HMOX1	2
BP	GO:0042762	regulation of sulfur metabolic process	2/172	11/18800	0.00433537	0.0169775	0.00953447	NFE2L2/SP1	2
BP	GO:0043471	regulation of cellular carbohydrate catabolic process	2/172	11/18800	0.00433537	0.0169775	0.00953447	PHKG2/TP53	2
BP	GO:0046149	pigment catabolic process	2/172	11/18800	0.00433537	0.0169775	0.00953447	ABCC1/HMOX1	2
BP	GO:0051574	positive regulation of histone H3-K9 methylation	2/172	11/18800	0.00433537	0.0169775	0.00953447	MYB/SIRT1	2
BP	GO:0070243	regulation of thymocyte apoptotic process	2/172	11/18800	0.00433537	0.0169775	0.00953447	HIF1A/TP53	2
BP	GO:0071394	cellular response to testosterone stimulus	2/172	11/18800	0.00433537	0.0169775	0.00953447	NCOA4/SIRT1	2
BP	GO:0071803	positive regulation of podosome assembly	2/172	11/18800	0.00433537	0.0169775	0.00953447	MAPK9/SRC	2
BP	GO:0090084	negative regulation of inclusion body assembly	2/172	11/18800	0.00433537	0.0169775	0.00953447	DNAJB6/HSF1	2
BP	GO:1901533	negative regulation of hematopoietic progenitor cell differentiation	2/172	11/18800	0.00433537	0.0169775	0.00953447	MYB/NFE2L2	2
BP	GO:0002700	regulation of production of molecular mediator of immune response	6/172	167/18800	0.00440407	0.01721	0.00966502	ATG5/HMOX1/IL6/SIRT1/SLC7A5/TLR4	6
BP	GO:0060538	skeletal muscle organ development	6/172	167/18800	0.00440407	0.01721	0.00966502	ARNTL/ATF3/CAV1/MAPK14/PRKAA1/RB1	6
BP	GO:0007006	mitochondrial membrane organization	5/172	117/18800	0.00444539	0.017353	0.00974536	BID/BNIP3/GCLC/MAPK8/TP53	5
BP	GO:0048662	negative regulation of smooth muscle cell proliferation	4/172	73/18800	0.0045091	0.0175645	0.00986414	CDKN1A/HMOX1/IFNG/TNFAIP3	4
BP	GO:2000573	positive regulation of DNA biosynthetic process	4/172	73/18800	0.0045091	0.0175645	0.00986414	ATM/MAPK1/MAPK3/SRC	4
BP	GO:0071346	cellular response to interferon-gamma	5/172	118/18800	0.00460844	0.0179325	0.0100708	IFNG/NOS2/SOCS1/TLR4/TP53	5
BP	GO:0045730	respiratory burst	3/172	37/18800	0.00465346	0.0180316	0.0101264	CYBB/NCF2/NOX1	3
BP	GO:1903580	positive regulation of ATP metabolic process	3/172	37/18800	0.00465346	0.0180316	0.0101264	HIF1A/IFNG/PRKAA1	3
BP	GO:1904358	positive regulation of telomere maintenance via telomere lengthening	3/172	37/18800	0.00465346	0.0180316	0.0101264	ATM/MAPK1/MAPK3	3
BP	GO:2000279	negative regulation of DNA biosynthetic process	3/172	37/18800	0.00465346	0.0180316	0.0101264	CDKN1A/SRC/TP53	3
BP	GO:0050920	regulation of chemotaxis	7/172	225/18800	0.00473529	0.0183294	0.0102937	DPP4/DUSP1/HSPB1/IL6/MAPK1/MAPK3/OXSR1	7
BP	GO:0000070	mitotic sister chromatid segregation	6/172	171/18800	0.00493804	0.0190941	0.0107231	ATM/BECN1/CHMP5/CHMP6/DUSP1/RB1	6
BP	GO:0006278	RNA-templated DNA biosynthetic process	4/172	75/18800	0.00496493	0.0191579	0.0107589	ATM/MAPK1/MAPK3/SRC	4
BP	GO:0070227	lymphocyte apoptotic process	4/172	75/18800	0.00496493	0.0191579	0.0107589	HIF1A/RIPK1/TP53/TSC22D3	4
BP	GO:0098813	nuclear chromosome segregation	8/172	287/18800	0.0050066	0.0192984	0.0108379	ATM/BECN1/CHMP5/CHMP6/DUSP1/FANCD2/FBXW7/RB1	8
BP	GO:0032635	interleukin-6 production	6/172	172/18800	0.00507865	0.0195353	0.0109709	IFNG/IL6/NOS2/STAT3/TLR4/TNFAIP3	6
BP	GO:0032675	regulation of interleukin-6 production	6/172	172/18800	0.00507865	0.0195353	0.0109709	IFNG/IL6/NOS2/STAT3/TLR4/TNFAIP3	6
BP	GO:0038127	ERBB signaling pathway	5/172	121/18800	0.00512311	0.0196658	0.0110442	CHMP6/FBXW7/MAPK1/PIK3CA/SRC	5
BP	GO:0006563	L-serine metabolic process	2/172	12/18800	0.00517129	0.0196658	0.0110442	CBS/PSAT1	2
BP	GO:0006787	porphyrin-containing compound catabolic process	2/172	12/18800	0.00517129	0.0196658	0.0110442	ABCC1/HMOX1	2
BP	GO:0031650	regulation of heat generation	2/172	12/18800	0.00517129	0.0196658	0.0110442	ARRDC3/PTGS2	2
BP	GO:0031953	negative regulation of protein autophosphorylation	2/172	12/18800	0.00517129	0.0196658	0.0110442	CAV1/JUN	2
BP	GO:0033015	tetrapyrrole catabolic process	2/172	12/18800	0.00517129	0.0196658	0.0110442	ABCC1/HMOX1	2
BP	GO:0051095	regulation of helicase activity	2/172	12/18800	0.00517129	0.0196658	0.0110442	SIRT1/TP53	2
BP	GO:0060907	positive regulation of macrophage cytokine production	2/172	12/18800	0.00517129	0.0196658	0.0110442	SIRT1/TLR4	2
BP	GO:0061517	macrophage proliferation	2/172	12/18800	0.00517129	0.0196658	0.0110442	MAPK1/MAPK3	2
BP	GO:0090209	negative regulation of triglyceride metabolic process	2/172	12/18800	0.00517129	0.0196658	0.0110442	FBXW7/LPIN1	2
BP	GO:2000628	regulation of miRNA metabolic process	2/172	12/18800	0.00517129	0.0196658	0.0110442	HRAS/RELA	2
BP	GO:0002292	T cell differentiation involved in immune response	4/172	76/18800	0.00520402	0.0197647	0.0110997	IFNG/IL6/MYB/STAT3	4
BP	GO:1904062	regulation of cation transmembrane transport	9/172	352/18800	0.005208	0.0197647	0.0110997	ATG5/CAV1/DRD4/IFNG/ISCU/KLHL24/OXSR1/RGS4/YWHAE	9
BP	GO:0010469	regulation of signaling receptor activity	6/172	173/18800	0.00522218	0.0197981	0.0111185	CHMP6/FBXW7/HIF1A/IFNG/KLHL24/SRC	6
BP	GO:0046887	positive regulation of hormone secretion	5/172	122/18800	0.00530337	0.0200852	0.0112797	ACSL4/HIF1A/PCK2/SNX4/TFR2	5
BP	GO:0010950	positive regulation of endopeptidase activity	6/172	174/18800	0.00536867	0.0203117	0.0114069	BID/HSF1/MAP3K5/PML/SIRT1/STAT3	6
BP	GO:0032570	response to progesterone	3/172	39/18800	0.00540086	0.0203499	0.0114284	CAV1/SRC/TXNIP	3
BP	GO:0042307	positive regulation of protein import into nucleus	3/172	39/18800	0.00540086	0.0203499	0.0114284	IFNG/MAPK14/PTGS2	3
BP	GO:0071470	cellular response to osmotic stress	3/172	39/18800	0.00540086	0.0203499	0.0114284	OXSR1/PTGS2/SLC2A1	3
BP	GO:2000516	positive regulation of CD4-positive, alpha-beta T cell activation	3/172	39/18800	0.00540086	0.0203499	0.0114284	IFNG/MYB/SOCS1	3
BP	GO:0043154	negative regulation of cysteine-type endopeptidase activity involved in apoptotic process	4/172	77/18800	0.00545069	0.0205167	0.011522	CD44/DNAJB6/PTGS2/SRC	4
BP	GO:0010906	regulation of glucose metabolic process	5/172	123/18800	0.00548806	0.0206362	0.0115892	PHKG2/SESN2/SIRT1/SRC/TP53	5
BP	GO:0010639	negative regulation of organelle organization	9/172	356/18800	0.00559735	0.0210257	0.0118079	ATM/BECN1/BNIP3/CAPG/DUSP1/GCLC/PIK3CA/SRC/TP53	9
BP	GO:0018210	peptidyl-threonine modification	5/172	124/18800	0.00567726	0.0212609	0.01194	ACVR1B/DDIT4/MAPK1/MAPK8/OXSR1	5
BP	GO:0046683	response to organophosphorus	5/172	124/18800	0.00567726	0.0212609	0.01194	CDO1/DUOX1/HSPA5/PANX1/PTGS2	5
BP	GO:0072329	monocarboxylic acid catabolic process	5/172	124/18800	0.00567726	0.0212609	0.01194	LPIN1/PCK2/PGD/SCP2/SESN2	5
BP	GO:0031279	regulation of cyclase activity	4/172	78/18800	0.00570507	0.0213217	0.0119741	MAPK14/MAPK3/MAPK8/NOS2	4
BP	GO:1903533	regulation of protein targeting	4/172	78/18800	0.00570507	0.0213217	0.0119741	BAP1/FBXW7/HRAS/PRKAA1	4
BP	GO:0016233	telomere capping	3/172	40/18800	0.0058	0.0216107	0.0121365	ATM/MAPK1/MAPK3	3
BP	GO:0019432	triglyceride biosynthetic process	3/172	40/18800	0.0058	0.0216107	0.0121365	FBXW7/LPIN1/PCK2	3
BP	GO:0044275	cellular carbohydrate catabolic process	3/172	40/18800	0.0058	0.0216107	0.0121365	PGD/PHKG2/TP53	3
BP	GO:0043280	positive regulation of cysteine-type endopeptidase activity involved in apoptotic process	5/172	125/18800	0.00587101	0.0218532	0.0122726	BID/HSF1/MAP3K5/PML/SIRT1	5
BP	GO:0014068	positive regulation of phosphatidylinositol 3-kinase signaling	4/172	79/18800	0.00596725	0.0221666	0.0124486	BECN1/FLT3/SIRT1/SRC	4
BP	GO:0070828	heterochromatin organization	4/172	79/18800	0.00596725	0.0221666	0.0124486	HELLS/PIK3CA/RB1/SIRT1	4
BP	GO:0043588	skin development	8/172	296/18800	0.00600243	0.0222748	0.0125094	ACVR1B/ALOX12/ALOX15B/ALOXE3/ARRDC3/RELA/TXNIP/ZFP36	8
BP	GO:0031053	primary miRNA processing	2/172	13/18800	0.00607494	0.0222748	0.0125094	IL6/STAT3	2
BP	GO:0031392	regulation of prostaglandin biosynthetic process	2/172	13/18800	0.00607494	0.0222748	0.0125094	PTGS2/SIRT1	2
BP	GO:0032494	response to peptidoglycan	2/172	13/18800	0.00607494	0.0222748	0.0125094	IL6/RELA	2
BP	GO:0045820	negative regulation of glycolytic process	2/172	13/18800	0.00607494	0.0222748	0.0125094	DDIT4/STAT3	2
BP	GO:0046761	viral budding from plasma membrane	2/172	13/18800	0.00607494	0.0222748	0.0125094	CHMP5/CHMP6	2
BP	GO:0061744	motor behavior	2/172	13/18800	0.00607494	0.0222748	0.0125094	DPP4/PRKAA1	2
BP	GO:0070424	regulation of nucleotide-binding oligomerization domain containing signaling pathway	2/172	13/18800	0.00607494	0.0222748	0.0125094	TLR4/TNFAIP3	2
BP	GO:0071287	cellular response to manganese ion	2/172	13/18800	0.00607494	0.0222748	0.0125094	ATF4/HSPA5	2
BP	GO:0071361	cellular response to ethanol	2/172	13/18800	0.00607494	0.0222748	0.0125094	CYBB/PRKAA1	2
BP	GO:0072540	T-helper 17 cell lineage commitment	2/172	13/18800	0.00607494	0.0222748	0.0125094	IL6/STAT3	2
BP	GO:1903025	regulation of RNA polymerase II regulatory region sequence-specific DNA binding	2/172	13/18800	0.00607494	0.0222748	0.0125094	DDIT3/FBXW7	2
BP	GO:1903599	positive regulation of autophagy of mitochondrion	2/172	13/18800	0.00607494	0.0222748	0.0125094	BNIP3/HIF1A	2
BP	GO:0043409	negative regulation of MAPK cascade	6/172	179/18800	0.00614666	0.0225154	0.0126445	ATF3/CAV1/DUSP1/NF2/PEBP1/TLR4	6
BP	GO:0032733	positive regulation of interleukin-10 production	3/172	41/18800	0.00621636	0.0226805	0.0127372	IL6/STAT3/TLR4	3
BP	GO:0045429	positive regulation of nitric oxide biosynthetic process	3/172	41/18800	0.00621636	0.0226805	0.0127372	IFNG/PTGS2/TLR4	3
BP	GO:0071548	response to dexamethasone	3/172	41/18800	0.00621636	0.0226805	0.0127372	DDIT4/PCK2/PIK3CA	3
BP	GO:0150077	regulation of neuroinflammatory response	3/172	41/18800	0.00621636	0.0226805	0.0127372	ATM/IL6/PTGS2	3
BP	GO:0045814	negative regulation of gene expression, epigenetic	4/172	80/18800	0.00623733	0.0227345	0.0127675	HELLS/PIK3CA/RB1/SIRT1	4
BP	GO:0045931	positive regulation of mitotic cell cycle	5/172	128/18800	0.0064802	0.0235964	0.0132516	ASNS/BRD4/HSF1/RB1/RRM2	5
BP	GO:0010833	telomere maintenance via telomere lengthening	4/172	81/18800	0.00651541	0.0236545	0.0132842	ATM/MAPK1/MAPK3/SRC	4
BP	GO:0030512	negative regulation of transforming growth factor beta receptor signaling pathway	4/172	81/18800	0.00651541	0.0236545	0.0132842	CAV1/HSPA5/SIRT1/TP53	4
BP	GO:0051303	establishment of chromosome localization	4/172	81/18800	0.00651541	0.0236545	0.0132842	ATM/BECN1/CHMP5/CHMP6	4
BP	GO:0010907	positive regulation of glucose metabolic process	3/172	42/18800	0.00665013	0.0239548	0.0134529	PHKG2/SIRT1/SRC	3
BP	GO:0031952	regulation of protein autophosphorylation	3/172	42/18800	0.00665013	0.0239548	0.0134529	CAV1/JUN/SRC	3
BP	GO:0050999	regulation of nitric-oxide synthase activity	3/172	42/18800	0.00665013	0.0239548	0.0134529	CAV1/GCH1/HIF1A	3
BP	GO:0055090	acylglycerol homeostasis	3/172	42/18800	0.00665013	0.0239548	0.0134529	HNF4A/SESN2/SIRT1	3
BP	GO:0070266	necroptotic process	3/172	42/18800	0.00665013	0.0239548	0.0134529	CAV1/RIPK1/TP53	3
BP	GO:0070328	triglyceride homeostasis	3/172	42/18800	0.00665013	0.0239548	0.0134529	HNF4A/SESN2/SIRT1	3
BP	GO:0071763	nuclear membrane organization	3/172	42/18800	0.00665013	0.0239548	0.0134529	CHMP5/CHMP6/LPIN1	3
BP	GO:1904591	positive regulation of protein import	3/172	42/18800	0.00665013	0.0239548	0.0134529	IFNG/MAPK14/PTGS2	3
BP	GO:0018394	peptidyl-lysine acetylation	6/172	184/18800	0.00700378	0.0250588	0.0140729	ATG5/MAPK3/MUC1/PML/PRKAA1/SIRT1	6
BP	GO:0009071	serine family amino acid catabolic process	2/172	14/18800	0.00704504	0.0250588	0.0140729	CBS/CDO1	2
BP	GO:0038166	angiotensin-activated signaling pathway	2/172	14/18800	0.00704504	0.0250588	0.0140729	CAV1/SRC	2
BP	GO:0043201	response to leucine	2/172	14/18800	0.00704504	0.0250588	0.0140729	PIK3CA/SESN2	2
BP	GO:0043650	dicarboxylic acid biosynthetic process	2/172	14/18800	0.00704504	0.0250588	0.0140729	GLS2/GOT1	2
BP	GO:0046753	non-lytic viral release	2/172	14/18800	0.00704504	0.0250588	0.0140729	CHMP5/CHMP6	2
BP	GO:0060576	intestinal epithelial cell development	2/172	14/18800	0.00704504	0.0250588	0.0140729	HIF1A/SRC	2
BP	GO:0071236	cellular response to antibiotic	2/172	14/18800	0.00704504	0.0250588	0.0140729	HSPA5/TP53	2
BP	GO:0071801	regulation of podosome assembly	2/172	14/18800	0.00704504	0.0250588	0.0140729	MAPK9/SRC	2
BP	GO:0072350	tricarboxylic acid metabolic process	2/172	14/18800	0.00704504	0.0250588	0.0140729	ACO1/CS	2
BP	GO:1901857	positive regulation of cellular respiration	2/172	14/18800	0.00704504	0.0250588	0.0140729	IFNG/ISCU	2
BP	GO:1902947	regulation of tau-protein kinase activity	2/172	14/18800	0.00704504	0.0250588	0.0140729	IFNG/RB1	2
BP	GO:1904294	positive regulation of ERAD pathway	2/172	14/18800	0.00704504	0.0250588	0.0140729	CAV1/NFE2L2	2
BP	GO:0030641	regulation of cellular pH	4/172	83/18800	0.00709599	0.0251142	0.014104	MAFG/MAPK1/MAPK3/NOX1	4
BP	GO:0032413	negative regulation of ion transmembrane transporter activity	4/172	83/18800	0.00709599	0.0251142	0.014104	CAV1/DRD4/OXSR1/YWHAE	4
BP	GO:0050000	chromosome localization	4/172	83/18800	0.00709599	0.0251142	0.014104	ATM/BECN1/CHMP5/CHMP6	4
BP	GO:0060395	SMAD protein signal transduction	4/172	83/18800	0.00709599	0.0251142	0.014104	GDF15/HNF4A/JUN/TF	4
BP	GO:0014075	response to amine	3/172	43/18800	0.00710148	0.0251142	0.014104	DRD4/NQO1/RGS4	3
BP	GO:1904407	positive regulation of nitric oxide metabolic process	3/172	43/18800	0.00710148	0.0251142	0.014104	IFNG/PTGS2/TLR4	3
BP	GO:0006639	acylglycerol metabolic process	5/172	131/18800	0.00713244	0.0251995	0.0141519	CAV1/FBXW7/LPIN1/PCK2/SIRT1	5
BP	GO:0000723	telomere maintenance	5/172	132/18800	0.00735968	0.0258783	0.0145331	ATM/MAPK1/MAPK3/PML/SRC	5
BP	GO:0006638	neutral lipid metabolic process	5/172	132/18800	0.00735968	0.0258783	0.0145331	CAV1/FBXW7/LPIN1/PCK2/SIRT1	5
BP	GO:0032874	positive regulation of stress-activated MAPK cascade	5/172	132/18800	0.00735968	0.0258783	0.0145331	HRAS/MAP3K5/NOX1/RIPK1/TLR4	5
BP	GO:0035270	endocrine system development	5/172	132/18800	0.00735968	0.0258783	0.0145331	ARNTL/HNF4A/IL6/MAPK1/MAPK3	5
BP	GO:0071333	cellular response to glucose stimulus	5/172	132/18800	0.00735968	0.0258783	0.0145331	GCLC/HIF1A/PCK2/PIK3CA/PRKAA1	5
BP	GO:0071277	cellular response to calcium ion	4/172	84/18800	0.00739868	0.0259906	0.0145962	ALOX15/HSPA5/JUN/PRKAA1	4
BP	GO:0051896	regulation of protein kinase B signaling	6/172	187/18800	0.00755785	0.0264935	0.0148786	DDIT3/GDF15/MTDH/PIK3CA/SIRT1/SRC	6
BP	GO:0007595	lactation	3/172	44/18800	0.00757059	0.0264935	0.0148786	CAV1/CDO1/HIF1A	3
BP	GO:0060443	mammary gland morphogenesis	3/172	44/18800	0.00757059	0.0264935	0.0148786	CAV1/PML/SRC	3
BP	GO:1903214	regulation of protein targeting to mitochondrion	3/172	44/18800	0.00757059	0.0264935	0.0148786	BAP1/FBXW7/PRKAA1	3
BP	GO:0008625	extrinsic apoptotic signaling pathway via death domain receptors	4/172	85/18800	0.00770976	0.0268784	0.0150947	ATF3/BID/HMOX1/TNFAIP3	4
BP	GO:0046889	positive regulation of lipid biosynthetic process	4/172	85/18800	0.00770976	0.0268784	0.0150947	ACSL3/IFNG/PRKAA1/PTGS2	4
BP	GO:2000106	regulation of leukocyte apoptotic process	4/172	85/18800	0.00770976	0.0268784	0.0150947	HIF1A/SIRT1/TP53/TSC22D3	4
BP	GO:2000117	negative regulation of cysteine-type endopeptidase activity	4/172	85/18800	0.00770976	0.0268784	0.0150947	CD44/DNAJB6/PTGS2/SRC	4
BP	GO:0043123	positive regulation of I-kappaB kinase/NF-kappaB signaling	6/172	188/18800	0.00774938	0.026991	0.015158	BRD4/HMOX1/MTDH/RELA/RIPK1/TLR4	6
BP	GO:0060047	heart contraction	7/172	247/18800	0.0077738	0.0270505	0.0151914	ATG5/CAV1/EPAS1/GCH1/PIK3CA/RGS4/YWHAE	7
BP	GO:0070304	positive regulation of stress-activated protein kinase signaling cascade	5/172	134/18800	0.00782923	0.027192	0.0152709	HRAS/MAP3K5/NOX1/RIPK1/TLR4	5
BP	GO:0071331	cellular response to hexose stimulus	5/172	134/18800	0.00782923	0.027192	0.0152709	GCLC/HIF1A/PCK2/PIK3CA/PRKAA1	5
BP	GO:0019915	lipid storage	4/172	86/18800	0.00802933	0.0275703	0.0154833	CAV1/FBXW7/IL6/SIRT1	4
BP	GO:1904705	regulation of vascular associated smooth muscle cell proliferation	4/172	86/18800	0.00802933	0.0275703	0.0154833	CDKN1A/HMOX1/JUN/MAP3K5	4
BP	GO:0048538	thymus development	3/172	45/18800	0.0080576	0.0275703	0.0154833	ATM/MAPK1/MAPK3	3
BP	GO:0060612	adipose tissue development	3/172	45/18800	0.0080576	0.0275703	0.0154833	ARRDC3/PIK3CA/SIRT1	3
BP	GO:0089718	amino acid import across plasma membrane	3/172	45/18800	0.0080576	0.0275703	0.0154833	RGS4/SLC1A5/SLC7A5	3
BP	GO:2000273	positive regulation of signaling receptor activity	3/172	45/18800	0.0080576	0.0275703	0.0154833	FBXW7/HIF1A/IFNG	3
BP	GO:2000785	regulation of autophagosome assembly	3/172	45/18800	0.0080576	0.0275703	0.0154833	BECN1/SNX4/WIPI1	3
BP	GO:0043401	steroid hormone mediated signaling pathway	5/172	135/18800	0.00807164	0.0275703	0.0154833	ARNTL/EGLN2/NCOA4/SIRT1/SRC	5
BP	GO:0006098	pentose-phosphate shunt	2/172	15/18800	0.00808031	0.0275703	0.0154833	PGD/TP53	2
BP	GO:0033127	regulation of histone phosphorylation	2/172	15/18800	0.00808031	0.0275703	0.0154833	ATM/MAPK3	2
BP	GO:0043517	positive regulation of DNA damage response, signal transduction by p53 class mediator	2/172	15/18800	0.00808031	0.0275703	0.0154833	ATM/HIC1	2
BP	GO:0043518	negative regulation of DNA damage response, signal transduction by p53 class mediator	2/172	15/18800	0.00808031	0.0275703	0.0154833	CD44/SIRT1	2
BP	GO:0048308	organelle inheritance	2/172	15/18800	0.00808031	0.0275703	0.0154833	MAPK1/MAPK3	2
BP	GO:0048313	Golgi inheritance	2/172	15/18800	0.00808031	0.0275703	0.0154833	MAPK1/MAPK3	2
BP	GO:0061307	cardiac neural crest cell differentiation involved in heart development	2/172	15/18800	0.00808031	0.0275703	0.0154833	MAPK1/MAPK3	2
BP	GO:0061308	cardiac neural crest cell development involved in heart development	2/172	15/18800	0.00808031	0.0275703	0.0154833	MAPK1/MAPK3	2
BP	GO:0070365	hepatocyte differentiation	2/172	15/18800	0.00808031	0.0275703	0.0154833	HNF4A/PCK2	2
BP	GO:2000345	regulation of hepatocyte proliferation	2/172	15/18800	0.00808031	0.0275703	0.0154833	FBXW7/TNFAIP3	2
BP	GO:2001279	regulation of unsaturated fatty acid biosynthetic process	2/172	15/18800	0.00808031	0.0275703	0.0154833	PTGS2/SIRT1	2
BP	GO:0071326	cellular response to monosaccharide stimulus	5/172	136/18800	0.00831923	0.0283593	0.0159264	GCLC/HIF1A/PCK2/PIK3CA/PRKAA1	5
BP	GO:0051701	biological process involved in interaction with host	6/172	191/18800	0.00834499	0.0284108	0.0159553	ATG7/CAV1/CHMP5/CHMP6/SLC1A5/SRC	6
BP	GO:0001892	embryonic placenta development	4/172	87/18800	0.00835748	0.0284108	0.0159553	DNAJB6/EPAS1/HIF1A/MAPK1	4
BP	GO:1990874	vascular associated smooth muscle cell proliferation	4/172	87/18800	0.00835748	0.0284108	0.0159553	CDKN1A/HMOX1/JUN/MAP3K5	4
BP	GO:0051924	regulation of calcium ion transport	7/172	251/18800	0.00845284	0.0287085	0.0161225	ATG5/CAV1/DRD4/PML/PTGS2/RGS4/YWHAE	7
BP	GO:0031018	endocrine pancreas development	3/172	46/18800	0.00856268	0.0289747	0.016272	ARNTL/HNF4A/IL6	3
BP	GO:0033047	regulation of mitotic sister chromatid segregation	3/172	46/18800	0.00856268	0.0289747	0.016272	ATM/BECN1/DUSP1	3
BP	GO:0042398	cellular modified amino acid biosynthetic process	3/172	46/18800	0.00856268	0.0289747	0.016272	GCH1/GCLC/NFE2L2	3
BP	GO:0090199	regulation of release of cytochrome c from mitochondria	3/172	46/18800	0.00856268	0.0289747	0.016272	BID/BNIP3/TP53	3
BP	GO:0060326	cell chemotaxis	8/172	315/18800	0.00859345	0.0290522	0.0163155	ABCC1/DPP4/DUSP1/HSPB1/IL6/MAPK1/MAPK3/OXSR1	8
BP	GO:0046849	bone remodeling	4/172	88/18800	0.00869429	0.0293661	0.0164918	IL6/SRC/TF/TNFAIP3	4
BP	GO:0023061	signal release	10/172	451/18800	0.00872844	0.0294545	0.0165415	ACSL4/ARNTL/HIF1A/HNF4A/IFNG/IL6/NOS2/PCK2/SNX4/TFR2	10
BP	GO:0006997	nucleus organization	5/172	138/18800	0.00883011	0.0297703	0.0167188	CHMP5/CHMP6/LPIN1/PML/SIRT1	5
BP	GO:0070663	regulation of leukocyte proliferation	7/172	254/18800	0.00899008	0.0302819	0.0170062	ATM/CDKN1A/IL6/MAPK1/MAPK3/TLR4/TNFAIP3	7
BP	GO:0007589	body fluid secretion	4/172	89/18800	0.00903986	0.0303104	0.0170221	ATG5/CAV1/CDO1/HIF1A	4
BP	GO:0044070	regulation of anion transport	4/172	89/18800	0.00903986	0.0303104	0.0170221	ATF4/PRKAA1/RGS4/RIPK1	4
BP	GO:0097581	lamellipodium organization	4/172	89/18800	0.00903986	0.0303104	0.0170221	CD44/ENPP2/PIK3CA/SRC	4
BP	GO:2001252	positive regulation of chromosome organization	4/172	89/18800	0.00903986	0.0303104	0.0170221	ATM/MAPK1/MAPK3/PML	4
BP	GO:0031648	protein destabilization	3/172	47/18800	0.00908595	0.0303104	0.0170221	FBXW7/SIRT1/SRC	3
BP	GO:0042220	response to cocaine	3/172	47/18800	0.00908595	0.0303104	0.0170221	DRD4/HSPA5/RGS4	3
BP	GO:0042908	xenobiotic transport	3/172	47/18800	0.00908595	0.0303104	0.0170221	ABCC1/SLC2A1/SLC7A5	3
BP	GO:0006089	lactate metabolic process	2/172	16/18800	0.00917949	0.0303104	0.0170221	HIF1A/TP53	2
BP	GO:0006750	glutathione biosynthetic process	2/172	16/18800	0.00917949	0.0303104	0.0170221	GCLC/NFE2L2	2
BP	GO:0010224	response to UV-B	2/172	16/18800	0.00917949	0.0303104	0.0170221	CDKN1A/RELA	2
BP	GO:0010715	regulation of extracellular matrix disassembly	2/172	16/18800	0.00917949	0.0303104	0.0170221	DPP4/IL6	2
BP	GO:0023035	CD40 signaling pathway	2/172	16/18800	0.00917949	0.0303104	0.0170221	FANCD2/TNFAIP3	2
BP	GO:0031649	heat generation	2/172	16/18800	0.00917949	0.0303104	0.0170221	ARRDC3/PTGS2	2
BP	GO:0034349	glial cell apoptotic process	2/172	16/18800	0.00917949	0.0303104	0.0170221	RB1/TP53	2
BP	GO:0034393	positive regulation of smooth muscle cell apoptotic process	2/172	16/18800	0.00917949	0.0303104	0.0170221	ATF4/IFNG	2
BP	GO:0035067	negative regulation of histone acetylation	2/172	16/18800	0.00917949	0.0303104	0.0170221	ATG5/SIRT1	2
BP	GO:0045779	negative regulation of bone resorption	2/172	16/18800	0.00917949	0.0303104	0.0170221	IL6/TNFAIP3	2
BP	GO:0051238	sequestering of metal ion	2/172	16/18800	0.00917949	0.0303104	0.0170221	FTH1/FTL	2
BP	GO:0061684	chaperone-mediated autophagy	2/172	16/18800	0.00917949	0.0303104	0.0170221	ATG5/LAMP2	2
BP	GO:0070242	thymocyte apoptotic process	2/172	16/18800	0.00917949	0.0303104	0.0170221	HIF1A/TP53	2
BP	GO:0090336	positive regulation of brown fat cell differentiation	2/172	16/18800	0.00917949	0.0303104	0.0170221	MAPK14/PTGS2	2
BP	GO:1901741	positive regulation of myoblast fusion	2/172	16/18800	0.00917949	0.0303104	0.0170221	GDF15/MAPK14	2
BP	GO:0000086	G2/M transition of mitotic cell cycle	5/172	140/18800	0.00936229	0.0308587	0.0173301	ATM/AURKA/BACH1/BRD4/CDKN1A	5
BP	GO:0050921	positive regulation of chemotaxis	5/172	140/18800	0.00936229	0.0308587	0.0173301	HSPB1/IL6/MAPK1/MAPK3/OXSR1	5
BP	GO:0061097	regulation of protein tyrosine kinase activity	4/172	90/18800	0.00939428	0.0309365	0.0173737	CAV1/CHMP6/FBXW7/SRC	4
BP	GO:0001701	in utero embryonic development	9/172	387/18800	0.00942979	0.0310257	0.0174238	ACVR1B/DNAJB6/EPAS1/HIF1A/KEAP1/MAFG/MAPK1/RRM2/TP53	9
BP	GO:0006953	acute-phase response	3/172	48/18800	0.00962756	0.0314252	0.0176482	IL6/PTGS2/TFR2	3
BP	GO:0010543	regulation of platelet activation	3/172	48/18800	0.00962756	0.0314252	0.0176482	ALOX12/IL6/TLR4	3
BP	GO:0046460	neutral lipid biosynthetic process	3/172	48/18800	0.00962756	0.0314252	0.0176482	FBXW7/LPIN1/PCK2	3
BP	GO:0046463	acylglycerol biosynthetic process	3/172	48/18800	0.00962756	0.0314252	0.0176482	FBXW7/LPIN1/PCK2	3
BP	GO:0048146	positive regulation of fibroblast proliferation	3/172	48/18800	0.00962756	0.0314252	0.0176482	CDKN1A/JUN/PML	3
BP	GO:1902003	regulation of amyloid-beta formation	3/172	48/18800	0.00962756	0.0314252	0.0176482	IFNG/RELA/SP1	3
BP	GO:0060491	regulation of cell projection assembly	6/172	197/18800	0.00963379	0.0314252	0.0176482	ATG3/ATG5/CAV1/HRAS/PIK3CA/SRC	6
BP	GO:0035296	regulation of tube diameter	5/172	141/18800	0.0096365	0.0314252	0.0176482	ATG5/CAV1/GCH1/GCLC/PTGS2	5
BP	GO:0046328	regulation of JNK cascade	5/172	141/18800	0.0096365	0.0314252	0.0176482	HRAS/MAP3K5/NOX1/RIPK1/TLR4	5
BP	GO:0097746	blood vessel diameter maintenance	5/172	141/18800	0.0096365	0.0314252	0.0176482	ATG5/CAV1/GCH1/GCLC/PTGS2	5
BP	GO:0008654	phospholipid biosynthetic process	7/172	258/18800	0.0097449	0.031708	0.017807	ACSL3/ALOX15/ATM/BECN1/LPIN1/PIK3CA/SOCS1	7
BP	GO:0043543	protein acylation	7/172	258/18800	0.0097449	0.031708	0.017807	ARNTL/ATG5/MAPK3/MUC1/PML/PRKAA1/SIRT1	7
BP	GO:0051983	regulation of chromosome segregation	4/172	91/18800	0.00975762	0.031708	0.017807	ATM/BECN1/DUSP1/RB1	4
BP	GO:0090277	positive regulation of peptide hormone secretion	4/172	91/18800	0.00975762	0.031708	0.017807	ACSL4/HIF1A/PCK2/TFR2	4
BP	GO:0035150	regulation of tube size	5/172	142/18800	0.00991619	0.0321949	0.0180804	ATG5/CAV1/GCH1/GCLC/PTGS2	5
BP	GO:0006869	lipid transport	9/172	391/18800	0.0100413	0.0325725	0.0182925	ABCC1/ACSL3/CAV1/DRD4/NOS2/PRKAA1/SCP2/SLC2A1/VLDLR	9
BP	GO:0002065	columnar/cuboidal epithelial cell differentiation	4/172	92/18800	0.01013	0.0327744	0.0184059	ARNTL/HIF1A/HNF4A/SRC	4
BP	GO:0019217	regulation of fatty acid metabolic process	4/172	92/18800	0.01013	0.0327744	0.0184059	CAV1/PTGS2/SIRT1/TRIB3	4
BP	GO:0009066	aspartate family amino acid metabolic process	3/172	49/18800	0.0101876	0.0327744	0.0184059	ASNS/ATF4/GOT1	3
BP	GO:0022602	ovulation cycle process	3/172	49/18800	0.0101876	0.0327744	0.0184059	HSPA5/SIRT1/SRC	3
BP	GO:0035094	response to nicotine	3/172	49/18800	0.0101876	0.0327744	0.0184059	HMOX1/MAPK1/RELA	3
BP	GO:0042304	regulation of fatty acid biosynthetic process	3/172	49/18800	0.0101876	0.0327744	0.0184059	PTGS2/SIRT1/TRIB3	3
BP	GO:0043330	response to exogenous dsRNA	3/172	49/18800	0.0101876	0.0327744	0.0184059	CAV1/MAPK1/MAPK3	3
BP	GO:0045058	T cell selection	3/172	49/18800	0.0101876	0.0327744	0.0184059	ATG5/IL6/STAT3	3
BP	GO:2000772	regulation of cellular senescence	3/172	49/18800	0.0101876	0.0327744	0.0184059	ARNTL/SIRT1/TP53	3
BP	GO:0035264	multicellular organism growth	5/172	143/18800	0.0102014	0.0327744	0.0184059	ATM/GDF15/PIK3CA/STAT3/TP53	5
BP	GO:2001056	positive regulation of cysteine-type endopeptidase activity	5/172	143/18800	0.0102014	0.0327744	0.0184059	BID/HSF1/MAP3K5/PML/SIRT1	5
BP	GO:0000097	sulfur amino acid biosynthetic process	2/172	17/18800	0.0103413	0.0328233	0.0184333	CBS/CDO1	2
BP	GO:0002295	T-helper cell lineage commitment	2/172	17/18800	0.0103413	0.0328233	0.0184333	IL6/STAT3	2
BP	GO:0006103	2-oxoglutarate metabolic process	2/172	17/18800	0.0103413	0.0328233	0.0184333	GOT1/GPT2	2
BP	GO:0010934	macrophage cytokine production	2/172	17/18800	0.0103413	0.0328233	0.0184333	SIRT1/TLR4	2
BP	GO:0010935	regulation of macrophage cytokine production	2/172	17/18800	0.0103413	0.0328233	0.0184333	SIRT1/TLR4	2
BP	GO:0035729	cellular response to hepatocyte growth factor stimulus	2/172	17/18800	0.0103413	0.0328233	0.0184333	GCLC/RELA	2
BP	GO:0043923	positive regulation by host of viral transcription	2/172	17/18800	0.0103413	0.0328233	0.0184333	JUN/SP1	2
BP	GO:0044539	long-chain fatty acid import into cell	2/172	17/18800	0.0103413	0.0328233	0.0184333	ACSL3/SLC2A1	2
BP	GO:0051770	positive regulation of nitric-oxide synthase biosynthetic process	2/172	17/18800	0.0103413	0.0328233	0.0184333	IFNG/TLR4	2
BP	GO:0061952	midbody abscission	2/172	17/18800	0.0103413	0.0328233	0.0184333	CHMP5/CHMP6	2
BP	GO:0086103	G protein-coupled receptor signaling pathway involved in heart process	2/172	17/18800	0.0103413	0.0328233	0.0184333	CAV1/SRC	2
BP	GO:0090083	regulation of inclusion body assembly	2/172	17/18800	0.0103413	0.0328233	0.0184333	DNAJB6/HSF1	2
BP	GO:1903358	regulation of Golgi organization	2/172	17/18800	0.0103413	0.0328233	0.0184333	MAPK1/MAPK3	2
BP	GO:1904355	positive regulation of telomere capping	2/172	17/18800	0.0103413	0.0328233	0.0184333	MAPK1/MAPK3	2
BP	GO:0014065	phosphatidylinositol 3-kinase signaling	5/172	144/18800	0.0104922	0.033245	0.0186702	BECN1/FLT3/PIK3CA/SIRT1/SRC	5
BP	GO:0002793	positive regulation of peptide secretion	4/172	93/18800	0.0105114	0.033245	0.0186702	ACSL4/HIF1A/PCK2/TFR2	4
BP	GO:0006885	regulation of pH	4/172	93/18800	0.0105114	0.033245	0.0186702	MAFG/MAPK1/MAPK3/NOX1	4
BP	GO:0045185	maintenance of protein location	4/172	93/18800	0.0105114	0.033245	0.0186702	CAV1/HSPA5/KEAP1/PML	4
BP	GO:0006163	purine nucleotide metabolic process	9/172	394/18800	0.0105193	0.033245	0.0186702	ACSL3/ACSL4/DDIT4/HIF1A/IFNG/NOS2/PRKAA1/SLC2A6/STAT3	9
BP	GO:0016042	lipid catabolic process	8/172	327/18800	0.0106142	0.0335162	0.0188225	ENPP2/HSD17B11/LPIN1/PCK2/PRDX6/PRKAA1/SCP2/SESN2	8
BP	GO:0032412	regulation of ion transmembrane transporter activity	7/172	263/18800	0.0107524	0.0337361	0.018946	CAV1/DRD4/IFNG/KLHL24/OXSR1/RIPK1/YWHAE	7
BP	GO:0031062	positive regulation of histone methylation	3/172	50/18800	0.0107662	0.0337361	0.018946	BRD4/MYB/SIRT1	3
BP	GO:0038084	vascular endothelial growth factor signaling pathway	3/172	50/18800	0.0107662	0.0337361	0.018946	FLT3/HSPB1/PIK3CA	3
BP	GO:0043370	regulation of CD4-positive, alpha-beta T cell differentiation	3/172	50/18800	0.0107662	0.0337361	0.018946	IFNG/MYB/SOCS1	3
BP	GO:0046638	positive regulation of alpha-beta T cell differentiation	3/172	50/18800	0.0107662	0.0337361	0.018946	IFNG/MYB/SOCS1	3
BP	GO:0060425	lung morphogenesis	3/172	50/18800	0.0107662	0.0337361	0.018946	KRAS/MAPK1/MAPK3	3
BP	GO:0072666	establishment of protein localization to vacuole	3/172	50/18800	0.0107662	0.0337361	0.018946	LAMP2/NCOA4/TNFAIP3	3
BP	GO:1902041	regulation of extrinsic apoptotic signaling pathway via death domain receptors	3/172	50/18800	0.0107662	0.0337361	0.018946	ATF3/HMOX1/TNFAIP3	3
BP	GO:1903053	regulation of extracellular matrix organization	3/172	50/18800	0.0107662	0.0337361	0.018946	DPP4/IL6/RB1	3
BP	GO:0002690	positive regulation of leukocyte chemotaxis	4/172	94/18800	0.0109021	0.0341326	0.0191687	IL6/MAPK1/MAPK3/OXSR1	4
BP	GO:0045787	positive regulation of cell cycle	8/172	329/18800	0.0109826	0.0343557	0.0192939	ASNS/AURKA/BECN1/BRD4/HSF1/RB1/RRM2/SRC	8
BP	GO:0007080	mitotic metaphase plate congression	3/172	51/18800	0.0113636	0.0353373	0.0198452	BECN1/CHMP5/CHMP6	3
BP	GO:0010823	negative regulation of mitochondrion organization	3/172	51/18800	0.0113636	0.0353373	0.0198452	BNIP3/GCLC/TP53	3
BP	GO:0019083	viral transcription	3/172	51/18800	0.0113636	0.0353373	0.0198452	JUN/SP1/ZFP36	3
BP	GO:0043124	negative regulation of I-kappaB kinase/NF-kappaB signaling	3/172	51/18800	0.0113636	0.0353373	0.0198452	RIPK1/SIRT1/TNFAIP3	3
BP	GO:0044088	regulation of vacuole organization	3/172	51/18800	0.0113636	0.0353373	0.0198452	BECN1/SNX4/WIPI1	3
BP	GO:0045912	negative regulation of carbohydrate metabolic process	3/172	51/18800	0.0113636	0.0353373	0.0198452	DDIT4/STAT3/TP53	3
BP	GO:0071622	regulation of granulocyte chemotaxis	3/172	51/18800	0.0113636	0.0353373	0.0198452	DPP4/MAPK1/MAPK3	3
BP	GO:0071322	cellular response to carbohydrate stimulus	5/172	147/18800	0.0113986	0.0354164	0.0198896	GCLC/HIF1A/PCK2/PIK3CA/PRKAA1	5
BP	GO:0006309	apoptotic DNA fragmentation	2/172	18/18800	0.0115646	0.0354245	0.0198942	HSF1/IL6	2
BP	GO:0006740	NADPH regeneration	2/172	18/18800	0.0115646	0.0354245	0.0198942	PGD/TP53	2
BP	GO:0008340	determination of adult lifespan	2/172	18/18800	0.0115646	0.0354245	0.0198942	ATM/TP53	2
BP	GO:0010759	positive regulation of macrophage chemotaxis	2/172	18/18800	0.0115646	0.0354245	0.0198942	MAPK1/MAPK3	2
BP	GO:0019081	viral translation	2/172	18/18800	0.0115646	0.0354245	0.0198942	ATG5/EIF2AK4	2
BP	GO:0019184	nonribosomal peptide biosynthetic process	2/172	18/18800	0.0115646	0.0354245	0.0198942	GCLC/NFE2L2	2
BP	GO:0032511	late endosome to vacuole transport via multivesicular body sorting pathway	2/172	18/18800	0.0115646	0.0354245	0.0198942	CHMP5/CHMP6	2
BP	GO:0034138	toll-like receptor 3 signaling pathway	2/172	18/18800	0.0115646	0.0354245	0.0198942	CAV1/TNFAIP3	2
BP	GO:0036035	osteoclast development	2/172	18/18800	0.0115646	0.0354245	0.0198942	FBXW7/SRC	2
BP	GO:0044320	cellular response to leptin stimulus	2/172	18/18800	0.0115646	0.0354245	0.0198942	SIRT1/STAT3	2
BP	GO:0045116	protein neddylation	2/172	18/18800	0.0115646	0.0354245	0.0198942	EPAS1/HIF1A	2
BP	GO:0046851	negative regulation of bone remodeling	2/172	18/18800	0.0115646	0.0354245	0.0198942	IL6/TNFAIP3	2
BP	GO:0050665	hydrogen peroxide biosynthetic process	2/172	18/18800	0.0115646	0.0354245	0.0198942	CYBB/DUOX1	2
BP	GO:0060438	trachea development	2/172	18/18800	0.0115646	0.0354245	0.0198942	MAPK1/MAPK3	2
BP	GO:0060965	negative regulation of miRNA-mediated gene silencing	2/172	18/18800	0.0115646	0.0354245	0.0198942	ELAVL1/TP53	2
BP	GO:0071071	regulation of phospholipid biosynthetic process	2/172	18/18800	0.0115646	0.0354245	0.0198942	ACSL3/LPIN1	2
BP	GO:0140354	lipid import into cell	2/172	18/18800	0.0115646	0.0354245	0.0198942	ACSL3/SLC2A1	2
BP	GO:0051053	negative regulation of DNA metabolic process	5/172	148/18800	0.0117122	0.0358468	0.0201313	ATM/CDKN1A/HSF1/SRC/TP53	5
BP	GO:0002686	negative regulation of leukocyte migration	3/172	52/18800	0.0119796	0.0365741	0.0205398	DPP4/DUSP1/HMOX1	3
BP	GO:0038093	Fc receptor signaling pathway	3/172	52/18800	0.0119796	0.0365741	0.0205398	MAPK8/MAPK9/SRC	3
BP	GO:0046605	regulation of centrosome cycle	3/172	52/18800	0.0119796	0.0365741	0.0205398	AURKA/CHMP5/SIRT1	3
BP	GO:0010389	regulation of G2/M transition of mitotic cell cycle	4/172	97/18800	0.0121298	0.0370018	0.02078	ATM/AURKA/BRD4/CDKN1A	4
BP	GO:0051656	establishment of organelle localization	9/172	404/18800	0.012237	0.0372982	0.0209464	ATM/BECN1/CHMP5/CHMP6/HIF1A/HMOX1/IFNG/SNX4/WIPI1	9
BP	GO:0030100	regulation of endocytosis	6/172	208/18800	0.0123555	0.037628	0.0211316	ALOX15/CAV1/DRD4/SRC/TF/TFR2	6
BP	GO:0016575	histone deacetylation	4/172	98/18800	0.0125579	0.0382128	0.0214601	JDP2/MAPK8/SIRT1/TP53	4
BP	GO:0043090	amino acid import	3/172	53/18800	0.0126146	0.0383538	0.0215392	RGS4/SLC1A5/SLC7A5	3
BP	GO:0006071	glycerol metabolic process	2/172	19/18800	0.0128481	0.0384922	0.021617	GOT1/PCK2	2
BP	GO:0010744	positive regulation of macrophage derived foam cell differentiation	2/172	19/18800	0.0128481	0.0384922	0.021617	ALOX15B/MAPK9	2
BP	GO:0035338	long-chain fatty-acyl-CoA biosynthetic process	2/172	19/18800	0.0128481	0.0384922	0.021617	ACSL3/ACSL4	2
BP	GO:0035728	response to hepatocyte growth factor	2/172	19/18800	0.0128481	0.0384922	0.021617	GCLC/RELA	2
BP	GO:0035795	negative regulation of mitochondrial membrane permeability	2/172	19/18800	0.0128481	0.0384922	0.021617	BNIP3/GCLC	2
BP	GO:0043652	engulfment of apoptotic cell	2/172	19/18800	0.0128481	0.0384922	0.021617	ALOX15/BECN1	2
BP	GO:0045947	negative regulation of translational initiation	2/172	19/18800	0.0128481	0.0384922	0.021617	ATF4/EIF2AK4	2
BP	GO:0051900	regulation of mitochondrial depolarization	2/172	19/18800	0.0128481	0.0384922	0.021617	GCLC/SRC	2
BP	GO:0060149	negative regulation of post-transcriptional gene silencing	2/172	19/18800	0.0128481	0.0384922	0.021617	ELAVL1/TP53	2
BP	GO:0060546	negative regulation of necroptotic process	2/172	19/18800	0.0128481	0.0384922	0.021617	CAV1/RIPK1	2
BP	GO:0060967	negative regulation of gene silencing by RNA	2/172	19/18800	0.0128481	0.0384922	0.021617	ELAVL1/TP53	2
BP	GO:0071800	podosome assembly	2/172	19/18800	0.0128481	0.0384922	0.021617	MAPK9/SRC	2
BP	GO:0097501	stress response to metal ion	2/172	19/18800	0.0128481	0.0384922	0.021617	HSPA5/MT1G	2
BP	GO:0098780	response to mitochondrial depolarisation	2/172	19/18800	0.0128481	0.0384922	0.021617	BECN1/SQSTM1	2
BP	GO:1900369	negative regulation of post-transcriptional gene silencing by RNA	2/172	19/18800	0.0128481	0.0384922	0.021617	ELAVL1/TP53	2
BP	GO:1902774	late endosome to lysosome transport	2/172	19/18800	0.0128481	0.0384922	0.021617	CHMP5/CHMP6	2
BP	GO:1904262	negative regulation of TORC1 signaling	2/172	19/18800	0.0128481	0.0384922	0.021617	ATM/SESN2	2
BP	GO:2000757	negative regulation of peptidyl-lysine acetylation	2/172	19/18800	0.0128481	0.0384922	0.021617	ATG5/SIRT1	2
BP	GO:0022898	regulation of transmembrane transporter activity	7/172	273/18800	0.0129916	0.0388705	0.0218294	CAV1/DRD4/IFNG/KLHL24/OXSR1/RIPK1/YWHAE	7
BP	GO:0050764	regulation of phagocytosis	4/172	99/18800	0.0129955	0.0388705	0.0218294	ALOX15/ATG3/ATG5/IFNG	4
BP	GO:0048863	stem cell differentiation	6/172	211/18800	0.0131829	0.039399	0.0221262	HIF1A/MAPK1/MAPK3/NFE2L2/STAT3/TP53	6
BP	GO:1903532	positive regulation of secretion by cell	7/172	274/18800	0.0132326	0.0394947	0.02218	ACSL4/HIF1A/IFNG/PCK2/SNX4/TFR2/TLR4	7
BP	GO:0006968	cellular defense response	3/172	54/18800	0.0132685	0.0394947	0.02218	BECN1/NCF2/RELA	3
BP	GO:0030520	intracellular estrogen receptor signaling pathway	3/172	54/18800	0.0132685	0.0394947	0.02218	EGLN2/NCOA4/SRC	3
BP	GO:0045661	regulation of myoblast differentiation	3/172	54/18800	0.0132685	0.0394947	0.02218	DDIT3/MAP3K5/MAPK14	3
BP	GO:0071715	icosanoid transport	3/172	54/18800	0.0132685	0.0394947	0.02218	ABCC1/DRD4/NOS2	3
BP	GO:0003333	amino acid transmembrane transport	4/172	100/18800	0.0134428	0.0399558	0.0224389	RGS4/SLC1A5/SLC38A1/SLC7A5	4
BP	GO:0002764	immune response-regulating signaling pathway	10/172	482/18800	0.0134451	0.0399558	0.0224389	CAV1/HRAS/MAPK1/MAPK8/MAPK9/PIK3CA/RELA/SRC/TLR4/TNFAIP3	10
BP	GO:0006626	protein targeting to mitochondrion	4/172	101/18800	0.0138998	0.0412404	0.0231604	BAP1/BID/FBXW7/PRKAA1	4
BP	GO:0048477	oogenesis	4/172	101/18800	0.0138998	0.0412404	0.0231604	ATM/AURKA/PANX1/SRC	4
BP	GO:0010883	regulation of lipid storage	3/172	55/18800	0.0139414	0.0412975	0.0231924	FBXW7/IL6/SIRT1	3
BP	GO:1902991	regulation of amyloid precursor protein catabolic process	3/172	55/18800	0.0139414	0.0412975	0.0231924	IFNG/RELA/SP1	3
BP	GO:0007034	vacuolar transport	5/172	155/18800	0.0140733	0.0415682	0.0233444	BECN1/CHMP5/CHMP6/LAMP2/NCOA4	5
BP	GO:0009110	vitamin biosynthetic process	2/172	20/18800	0.0141907	0.0415682	0.0233444	IFNG/PSAT1	2
BP	GO:0043373	CD4-positive, alpha-beta T cell lineage commitment	2/172	20/18800	0.0141907	0.0415682	0.0233444	IL6/STAT3	2
BP	GO:0043555	regulation of translation in response to stress	2/172	20/18800	0.0141907	0.0415682	0.0233444	EIF2AK4/SESN2	2
BP	GO:0043984	histone H4-K16 acetylation	2/172	20/18800	0.0141907	0.0415682	0.0233444	ATG5/SIRT1	2
BP	GO:0045591	positive regulation of regulatory T cell differentiation	2/172	20/18800	0.0141907	0.0415682	0.0233444	IFNG/SOCS1	2
BP	GO:0062099	negative regulation of programmed necrotic cell death	2/172	20/18800	0.0141907	0.0415682	0.0233444	CAV1/RIPK1	2
BP	GO:0070233	negative regulation of T cell apoptotic process	2/172	20/18800	0.0141907	0.0415682	0.0233444	HIF1A/TSC22D3	2
BP	GO:1902074	response to salt	2/172	20/18800	0.0141907	0.0415682	0.0233444	HSF1/HSPA5	2
BP	GO:1903204	negative regulation of oxidative stress-induced neuron death	2/172	20/18800	0.0141907	0.0415682	0.0233444	ATF4/HIF1A	2
BP	GO:1903978	regulation of microglial cell activation	2/172	20/18800	0.0141907	0.0415682	0.0233444	ATM/IL6	2
BP	GO:1904292	regulation of ERAD pathway	2/172	20/18800	0.0141907	0.0415682	0.0233444	CAV1/NFE2L2	2
BP	GO:2000479	regulation of cAMP-dependent protein kinase activity	2/172	20/18800	0.0141907	0.0415682	0.0233444	SESN2/SIRT1	2
BP	GO:2000678	negative regulation of transcription regulatory region DNA binding	2/172	20/18800	0.0141907	0.0415682	0.0233444	DDIT3/FBXW7	2
BP	GO:0009117	nucleotide metabolic process	10/172	487/18800	0.0143572	0.0420162	0.0235961	ACSL3/ACSL4/DDIT4/HIF1A/IFNG/NOS2/PRKAA1/RRM2/SLC2A6/STAT3	10
BP	GO:0009062	fatty acid catabolic process	4/172	102/18800	0.0143665	0.0420162	0.0235961	LPIN1/PCK2/SCP2/SESN2	4
BP	GO:0072521	purine-containing compound metabolic process	9/172	416/18800	0.0145656	0.0425648	0.0239041	ACSL3/ACSL4/DDIT4/HIF1A/IFNG/NOS2/PRKAA1/SLC2A6/STAT3	9
BP	GO:0001836	release of cytochrome c from mitochondria	3/172	56/18800	0.0146334	0.0425942	0.0239206	BID/BNIP3/TP53	3
BP	GO:0010676	positive regulation of cellular carbohydrate metabolic process	3/172	56/18800	0.0146334	0.0425942	0.0239206	PHKG2/SIRT1/SRC	3
BP	GO:0034205	amyloid-beta formation	3/172	56/18800	0.0146334	0.0425942	0.0239206	IFNG/RELA/SP1	3
BP	GO:0043331	response to dsRNA	3/172	56/18800	0.0146334	0.0425942	0.0239206	CAV1/MAPK1/MAPK3	3
BP	GO:0051438	regulation of ubiquitin-protein transferase activity	3/172	56/18800	0.0146334	0.0425942	0.0239206	ARRDC3/FBXW7/TRIB3	3
BP	GO:0050866	negative regulation of cell activation	6/172	216/18800	0.0146471	0.0426002	0.023924	ALOX12/ATM/GCLC/HMOX1/SOCS1/TNFAIP3	6
BP	GO:0007265	Ras protein signal transduction	8/172	347/18800	0.0147371	0.0428282	0.024052	CDKN1A/HRAS/JUN/KRAS/NRAS/RB1/SQSTM1/TP53	8
BP	GO:0007059	chromosome segregation	8/172	348/18800	0.0149699	0.0434706	0.0244128	ATM/BECN1/CHMP5/CHMP6/DUSP1/FANCD2/FBXW7/RB1	8
BP	GO:0046631	alpha-beta T cell activation	5/172	158/18800	0.0151765	0.0440011	0.0247107	IFNG/IL6/MYB/SOCS1/STAT3	5
BP	GO:0070665	positive regulation of leukocyte proliferation	5/172	158/18800	0.0151765	0.0440011	0.0247107	CDKN1A/IL6/MAPK1/MAPK3/TLR4	5
BP	GO:0046822	regulation of nucleocytoplasmic transport	4/172	104/18800	0.0153294	0.0442449	0.0248477	IFNG/MAPK14/PTGS2/YWHAE	4
BP	GO:0006998	nuclear envelope organization	3/172	57/18800	0.0153446	0.0442449	0.0248477	CHMP5/CHMP6/LPIN1	3
BP	GO:0018023	peptidyl-lysine trimethylation	3/172	57/18800	0.0153446	0.0442449	0.0248477	BRD4/SETD1B/SIRT1	3
BP	GO:0042306	regulation of protein import into nucleus	3/172	57/18800	0.0153446	0.0442449	0.0248477	IFNG/MAPK14/PTGS2	3
BP	GO:0043551	regulation of phosphatidylinositol 3-kinase activity	3/172	57/18800	0.0153446	0.0442449	0.0248477	FLT3/SOCS1/SRC	3
BP	GO:0048255	mRNA stabilization	3/172	57/18800	0.0153446	0.0442449	0.0248477	ELAVL1/MAPK14/ZFP36	3
BP	GO:0070228	regulation of lymphocyte apoptotic process	3/172	57/18800	0.0153446	0.0442449	0.0248477	HIF1A/TP53/TSC22D3	3
BP	GO:0045861	negative regulation of proteolysis	8/172	350/18800	0.0154437	0.0443998	0.0249347	CD44/DNAJB6/GABARAPL2/PEBP1/PML/PTGS2/SRC/TP53	8
BP	GO:0048285	organelle fission	10/172	493/18800	0.0155121	0.0443998	0.0249347	ATM/AURKA/BECN1/BNIP3/CHMP5/CHMP6/DUSP1/FANCD2/RB1/SLC2A8	10
BP	GO:0044242	cellular lipid catabolic process	6/172	219/18800	0.015578	0.0443998	0.0249347	ENPP2/LPIN1/PCK2/PRDX6/SCP2/SESN2	6
BP	GO:0009067	aspartate family amino acid biosynthetic process	2/172	21/18800	0.0155911	0.0443998	0.0249347	ASNS/GOT1	2
BP	GO:0009070	serine family amino acid biosynthetic process	2/172	21/18800	0.0155911	0.0443998	0.0249347	CBS/PSAT1	2
BP	GO:0019400	alditol metabolic process	2/172	21/18800	0.0155911	0.0443998	0.0249347	GOT1/PCK2	2
BP	GO:0035330	regulation of hippo signaling	2/172	21/18800	0.0155911	0.0443998	0.0249347	MAPK14/NF2	2
BP	GO:0045717	negative regulation of fatty acid biosynthetic process	2/172	21/18800	0.0155911	0.0443998	0.0249347	SIRT1/TRIB3	2
BP	GO:0046716	muscle cell cellular homeostasis	2/172	21/18800	0.0155911	0.0443998	0.0249347	HIF1A/LAMP2	2
BP	GO:0051767	nitric-oxide synthase biosynthetic process	2/172	21/18800	0.0155911	0.0443998	0.0249347	IFNG/TLR4	2
BP	GO:0051769	regulation of nitric-oxide synthase biosynthetic process	2/172	21/18800	0.0155911	0.0443998	0.0249347	IFNG/TLR4	2
BP	GO:0051882	mitochondrial depolarization	2/172	21/18800	0.0155911	0.0443998	0.0249347	GCLC/SRC	2
BP	GO:0070262	peptidyl-serine dephosphorylation	2/172	21/18800	0.0155911	0.0443998	0.0249347	DUSP1/YWHAE	2
BP	GO:0090141	positive regulation of mitochondrial fission	2/172	21/18800	0.0155911	0.0443998	0.0249347	AURKA/BNIP3	2
BP	GO:1900543	negative regulation of purine nucleotide metabolic process	2/172	21/18800	0.0155911	0.0443998	0.0249347	DDIT4/STAT3	2
BP	GO:1901739	regulation of myoblast fusion	2/172	21/18800	0.0155911	0.0443998	0.0249347	GDF15/MAPK14	2
BP	GO:0002831	regulation of response to biotic stimulus	8/172	351/18800	0.0156846	0.0446316	0.0250648	ATG5/EIF2AK4/MAPK3/NFE2L2/SOCS1/SRC/TLR4/TNFAIP3	8
BP	GO:1901361	organic cyclic compound catabolic process	10/172	494/18800	0.0157111	0.0446724	0.0250877	ABCC1/ATM/ELAVL1/HMOX1/HSD17B11/HSF1/IL6/MAPK14/NFE2L2/ZFP36	10
BP	GO:0006576	cellular biogenic amine metabolic process	4/172	105/18800	0.0158258	0.0449292	0.025232	DRD4/EPAS1/GCH1/SAT1	4
BP	GO:0008585	female gonad development	4/172	105/18800	0.0158258	0.0449292	0.025232	ATM/HSPA5/SIRT1/SRC	4
BP	GO:0006753	nucleoside phosphate metabolic process	10/172	495/18800	0.015912	0.0451392	0.0253499	ACSL3/ACSL4/DDIT4/HIF1A/IFNG/NOS2/PRKAA1/RRM2/SLC2A6/STAT3	10
BP	GO:0006584	catecholamine metabolic process	3/172	58/18800	0.016075	0.0454616	0.025531	DRD4/EPAS1/GCH1	3
BP	GO:0009712	catechol-containing compound metabolic process	3/172	58/18800	0.016075	0.0454616	0.025531	DRD4/EPAS1/GCH1	3
BP	GO:0071709	membrane assembly	3/172	58/18800	0.016075	0.0454616	0.025531	CAV1/CHMP5/CHMP6	3
BP	GO:0090303	positive regulation of wound healing	3/172	58/18800	0.016075	0.0454616	0.025531	DUOX1/HRAS/NFE2L2	3
BP	GO:0006816	calcium ion transport	9/172	424/18800	0.0162904	0.0460355	0.0258532	ATG5/CAV1/DDIT3/DRD4/PANX1/PML/PTGS2/RGS4/YWHAE	9
BP	GO:0032410	negative regulation of transporter activity	4/172	106/18800	0.0163322	0.0460828	0.0258798	CAV1/DRD4/OXSR1/YWHAE	4
BP	GO:0051341	regulation of oxidoreductase activity	4/172	106/18800	0.0163322	0.0460828	0.0258798	CAV1/GCH1/HIF1A/IFNG	4
BP	GO:0032200	telomere organization	5/172	162/18800	0.0167355	0.0471845	0.0264985	ATM/MAPK1/MAPK3/PML/SRC	5
BP	GO:0051353	positive regulation of oxidoreductase activity	3/172	59/18800	0.0168247	0.0473421	0.026587	GCH1/HIF1A/IFNG	3
BP	GO:0030004	cellular monovalent inorganic cation homeostasis	4/172	107/18800	0.0168487	0.0473421	0.026587	MAFG/MAPK1/MAPK3/NOX1	4
BP	GO:0033209	tumor necrosis factor-mediated signaling pathway	4/172	107/18800	0.0168487	0.0473421	0.026587	RELA/RIPK1/TNFAIP3/TP53	4
BP	GO:0002363	alpha-beta T cell lineage commitment	2/172	22/18800	0.0170483	0.0473421	0.026587	IL6/STAT3	2
BP	GO:0006925	inflammatory cell apoptotic process	2/172	22/18800	0.0170483	0.0473421	0.026587	IL6/SIRT1	2
BP	GO:0010226	response to lithium ion	2/172	22/18800	0.0170483	0.0473421	0.026587	NFE2L2/PTGS2	2
BP	GO:0010866	regulation of triglyceride biosynthetic process	2/172	22/18800	0.0170483	0.0473421	0.026587	FBXW7/LPIN1	2
BP	GO:0032780	negative regulation of ATP-dependent activity	2/172	22/18800	0.0170483	0.0473421	0.026587	SIRT1/TP53	2
BP	GO:0034104	negative regulation of tissue remodeling	2/172	22/18800	0.0170483	0.0473421	0.026587	IL6/TNFAIP3	2
BP	GO:0039702	viral budding via host ESCRT complex	2/172	22/18800	0.0170483	0.0473421	0.026587	CHMP5/CHMP6	2
BP	GO:0043369	CD4-positive or CD8-positive, alpha-beta T cell lineage commitment	2/172	22/18800	0.0170483	0.0473421	0.026587	IL6/STAT3	2
BP	GO:0044321	response to leptin	2/172	22/18800	0.0170483	0.0473421	0.026587	SIRT1/STAT3	2
BP	GO:0045980	negative regulation of nucleotide metabolic process	2/172	22/18800	0.0170483	0.0473421	0.026587	DDIT4/STAT3	2
BP	GO:0046628	positive regulation of insulin receptor signaling pathway	2/172	22/18800	0.0170483	0.0473421	0.026587	SIRT1/SRC	2
BP	GO:0050765	negative regulation of phagocytosis	2/172	22/18800	0.0170483	0.0473421	0.026587	ATG3/ATG5	2
BP	GO:0051000	positive regulation of nitric-oxide synthase activity	2/172	22/18800	0.0170483	0.0473421	0.026587	GCH1/HIF1A	2
BP	GO:0061081	positive regulation of myeloid leukocyte cytokine production involved in immune response	2/172	22/18800	0.0170483	0.0473421	0.026587	SIRT1/TLR4	2
BP	GO:1900273	positive regulation of long-term synaptic potentiation	2/172	22/18800	0.0170483	0.0473421	0.026587	EIF2AK4/SQSTM1	2
BP	GO:1901673	regulation of mitotic spindle assembly	2/172	22/18800	0.0170483	0.0473421	0.026587	CHMP5/CHMP6	2
BP	GO:1905709	negative regulation of membrane permeability	2/172	22/18800	0.0170483	0.0473421	0.026587	BNIP3/GCLC	2
BP	GO:0007173	epidermal growth factor receptor signaling pathway	4/172	108/18800	0.0173752	0.0482136	0.0270765	CHMP6/FBXW7/PIK3CA/SRC	4
BP	GO:0032102	negative regulation of response to external stimulus	9/172	429/18800	0.017442	0.0483263	0.0271397	ALOX12/ATG5/DPP4/DUSP1/MAPK14/RB1/SRC/TNFAIP3/ZFP36	9
BP	GO:0050804	modulation of chemical synaptic transmission	9/172	429/18800	0.017442	0.0483263	0.0271397	ATF4/EIF2AK4/HRAS/KRAS/MAPK1/PTGS2/RGS4/SQSTM1/SRC	9
BP	GO:0002753	cytoplasmic pattern recognition receptor signaling pathway	3/172	60/18800	0.0175937	0.0486367	0.0273141	RELA/TLR4/TNFAIP3	3
BP	GO:0030071	regulation of mitotic metaphase/anaphase transition	3/172	60/18800	0.0175937	0.0486367	0.0273141	ATM/DUSP1/RB1	3
BP	GO:1903078	positive regulation of protein localization to plasma membrane	3/172	60/18800	0.0175937	0.0486367	0.0273141	ACSL3/IFNG/SQSTM1	3
BP	GO:0099177	regulation of trans-synaptic signaling	9/172	430/18800	0.0176793	0.0488369	0.0274265	ATF4/EIF2AK4/HRAS/KRAS/MAPK1/PTGS2/RGS4/SQSTM1/SRC	9
BP	GO:0046545	development of primary female sexual characteristics	4/172	109/18800	0.017912	0.0494424	0.0277666	ATM/HSPA5/SIRT1/SRC	4
BP	GO:0099601	regulation of neurotransmitter receptor activity	3/172	61/18800	0.018382	0.0506261	0.0284313	IFNG/KLHL24/SRC	3
BP	GO:1903409	reactive oxygen species biosynthetic process	3/172	61/18800	0.018382	0.0506261	0.0284313	CYBB/DUOX1/TLR4	3
BP	GO:1904589	regulation of protein import	3/172	61/18800	0.018382	0.0506261	0.0284313	IFNG/MAPK14/PTGS2	3
BP	GO:0140014	mitotic nuclear division	7/172	293/18800	0.0184454	0.0506272	0.0284319	ATM/AURKA/BECN1/CHMP5/CHMP6/DUSP1/RB1	7
BP	GO:0002689	negative regulation of leukocyte chemotaxis	2/172	23/18800	0.018561	0.0506272	0.0284319	DPP4/DUSP1	2
BP	GO:0003323	type B pancreatic cell development	2/172	23/18800	0.018561	0.0506272	0.0284319	ARNTL/HNF4A	2
BP	GO:0006622	protein targeting to lysosome	2/172	23/18800	0.018561	0.0506272	0.0284319	LAMP2/NCOA4	2
BP	GO:0010893	positive regulation of steroid biosynthetic process	2/172	23/18800	0.018561	0.0506272	0.0284319	IFNG/PRKAA1	2
BP	GO:0030728	ovulation	2/172	23/18800	0.018561	0.0506272	0.0284319	PTGS2/SIRT1	2
BP	GO:0031468	nuclear membrane reassembly	2/172	23/18800	0.018561	0.0506272	0.0284319	CHMP5/CHMP6	2
BP	GO:0045663	positive regulation of myoblast differentiation	2/172	23/18800	0.018561	0.0506272	0.0284319	MAP3K5/MAPK14	2
BP	GO:0048169	regulation of long-term neuronal synaptic plasticity	2/172	23/18800	0.018561	0.0506272	0.0284319	HRAS/KRAS	2
BP	GO:0060444	branching involved in mammary gland duct morphogenesis	2/172	23/18800	0.018561	0.0506272	0.0284319	PML/SRC	2
BP	GO:0060575	intestinal epithelial cell differentiation	2/172	23/18800	0.018561	0.0506272	0.0284319	HIF1A/SRC	2
BP	GO:1901984	negative regulation of protein acetylation	2/172	23/18800	0.018561	0.0506272	0.0284319	ATG5/SIRT1	2
BP	GO:1902410	mitotic cytokinetic process	2/172	23/18800	0.018561	0.0506272	0.0284319	CHMP5/CHMP6	2
BP	GO:0001818	negative regulation of cytokine production	8/172	363/18800	0.0187923	0.0512201	0.0287649	DDIT3/HMOX1/IFNG/IL6/PML/TLR4/TNFAIP3/ZFP36	8
BP	GO:0007088	regulation of mitotic nuclear division	4/172	111/18800	0.0190162	0.0516775	0.0290218	ATM/AURKA/DUSP1/RB1	4
BP	GO:0014066	regulation of phosphatidylinositol 3-kinase signaling	4/172	111/18800	0.0190162	0.0516775	0.0290218	BECN1/FLT3/SIRT1/SRC	4
BP	GO:0048640	negative regulation of developmental growth	4/172	111/18800	0.0190162	0.0516775	0.0290218	CDKN1A/GDF15/RGS4/ULK2	4
BP	GO:0071347	cellular response to interleukin-1	4/172	111/18800	0.0190162	0.0516775	0.0290218	HIF1A/IL6/MAPK3/RELA	4
BP	GO:0007091	metaphase/anaphase transition of mitotic cell cycle	3/172	62/18800	0.0191897	0.0520339	0.0292219	ATM/DUSP1/RB1	3
BP	GO:0043030	regulation of macrophage activation	3/172	62/18800	0.0191897	0.0520339	0.0292219	ATM/IL6/TLR4	3
BP	GO:0044091	membrane biogenesis	3/172	62/18800	0.0191897	0.0520339	0.0292219	CAV1/CHMP5/CHMP6	3
BP	GO:0046651	lymphocyte proliferation	7/172	296/18800	0.0193839	0.0525217	0.0294959	ATM/CDKN1A/FLT3/HELLS/IL6/TLR4/TP53	7
BP	GO:0021987	cerebral cortex development	4/172	112/18800	0.0195838	0.0530245	0.0297782	BNIP3/HIF1A/SLC2A1/YWHAE	4
BP	GO:0009150	purine ribonucleotide metabolic process	8/172	366/18800	0.0196336	0.0531203	0.029832	ACSL3/ACSL4/DDIT4/HIF1A/IFNG/PRKAA1/SLC2A6/STAT3	8
BP	GO:0016482	cytosolic transport	5/172	169/18800	0.0197131	0.0532571	0.0299089	BECN1/MAPK1/MAPK3/SRC/WIPI1	5
BP	GO:0021543	pallium development	5/172	169/18800	0.0197131	0.0532571	0.0299089	BNIP3/HIF1A/NF2/SLC2A1/YWHAE	5
BP	GO:0032613	interleukin-10 production	3/172	63/18800	0.0200168	0.0535153	0.0300539	IL6/STAT3/TLR4	3
BP	GO:0032653	regulation of interleukin-10 production	3/172	63/18800	0.0200168	0.0535153	0.0300539	IL6/STAT3/TLR4	3
BP	GO:0046173	polyol biosynthetic process	3/172	63/18800	0.0200168	0.0535153	0.0300539	GCH1/GOT1/PCK2	3
BP	GO:1902099	regulation of metaphase/anaphase transition of cell cycle	3/172	63/18800	0.0200168	0.0535153	0.0300539	ATM/DUSP1/RB1	3
BP	GO:0001778	plasma membrane repair	2/172	24/18800	0.0201282	0.0535153	0.0300539	CHMP5/CHMP6	2
BP	GO:0006346	DNA methylation-dependent heterochromatin assembly	2/172	24/18800	0.0201282	0.0535153	0.0300539	HELLS/SIRT1	2
BP	GO:0006541	glutamine metabolic process	2/172	24/18800	0.0201282	0.0535153	0.0300539	ASNS/GLS2	2
BP	GO:0032740	positive regulation of interleukin-17 production	2/172	24/18800	0.0201282	0.0535153	0.0300539	IL6/SLC7A5	2
BP	GO:0035162	embryonic hemopoiesis	2/172	24/18800	0.0201282	0.0535153	0.0300539	ATF4/HIF1A	2
BP	GO:0036120	cellular response to platelet-derived growth factor stimulus	2/172	24/18800	0.0201282	0.0535153	0.0300539	SRC/TLR4	2
BP	GO:0038095	Fc-epsilon receptor signaling pathway	2/172	24/18800	0.0201282	0.0535153	0.0300539	MAPK8/MAPK9	2
BP	GO:0042026	protein refolding	2/172	24/18800	0.0201282	0.0535153	0.0300539	HSPA5/HSPB1	2
BP	GO:0048011	neurotrophin TRK receptor signaling pathway	2/172	24/18800	0.0201282	0.0535153	0.0300539	DDIT4/SRC	2
BP	GO:0048143	astrocyte activation	2/172	24/18800	0.0201282	0.0535153	0.0300539	IFNG/IL6	2
BP	GO:0051156	glucose 6-phosphate metabolic process	2/172	24/18800	0.0201282	0.0535153	0.0300539	PGD/TP53	2
BP	GO:0060143	positive regulation of syncytium formation by plasma membrane fusion	2/172	24/18800	0.0201282	0.0535153	0.0300539	GDF15/MAPK14	2
BP	GO:0060547	negative regulation of necrotic cell death	2/172	24/18800	0.0201282	0.0535153	0.0300539	CAV1/RIPK1	2
BP	GO:0070841	inclusion body assembly	2/172	24/18800	0.0201282	0.0535153	0.0300539	DNAJB6/HSF1	2
BP	GO:1901028	regulation of mitochondrial outer membrane permeabilization involved in apoptotic signaling pathway	2/172	24/18800	0.0201282	0.0535153	0.0300539	GCLC/MAPK8	2
BP	GO:1904996	positive regulation of leukocyte adhesion to vascular endothelial cell	2/172	24/18800	0.0201282	0.0535153	0.0300539	IL6/RELA	2
BP	GO:2000679	positive regulation of transcription regulatory region DNA binding	2/172	24/18800	0.0201282	0.0535153	0.0300539	IFNG/RB1	2
BP	GO:2000737	negative regulation of stem cell differentiation	2/172	24/18800	0.0201282	0.0535153	0.0300539	NFE2L2/STAT3	2
BP	GO:0018958	phenol-containing compound metabolic process	4/172	113/18800	0.0201618	0.0535661	0.0300824	DRD4/DUOX1/EPAS1/GCH1	4
BP	GO:0051099	positive regulation of binding	5/172	171/18800	0.0206236	0.0547537	0.0307493	CAV1/HSF1/IFNG/RB1/TRIB3	5
BP	GO:0032943	mononuclear cell proliferation	7/172	300/18800	0.0206865	0.0548811	0.0308209	ATM/CDKN1A/FLT3/HELLS/IL6/TLR4/TP53	7
BP	GO:0042303	molting cycle	4/172	114/18800	0.0207502	0.0549708	0.0308713	ACVR1B/ARNTL/PTGS2/RELA	4
BP	GO:0042633	hair cycle	4/172	114/18800	0.0207502	0.0549708	0.0308713	ACVR1B/ARNTL/PTGS2/RELA	4
BP	GO:0030888	regulation of B cell proliferation	3/172	64/18800	0.0208633	0.0550725	0.0309284	ATM/CDKN1A/TLR4	3
BP	GO:0032507	maintenance of protein location in cell	3/172	64/18800	0.0208633	0.0550725	0.0309284	CAV1/HSPA5/PML	3
BP	GO:0040014	regulation of multicellular organism growth	3/172	64/18800	0.0208633	0.0550725	0.0309284	GDF15/PIK3CA/STAT3	3
BP	GO:0045670	regulation of osteoclast differentiation	3/172	64/18800	0.0208633	0.0550725	0.0309284	FBXW7/IFNG/TLR4	3
BP	GO:0060760	positive regulation of response to cytokine stimulus	3/172	64/18800	0.0208633	0.0550725	0.0309284	HIF1A/RIPK1/TLR4	3
BP	GO:0046700	heterocycle catabolic process	9/172	443/18800	0.0209828	0.0553483	0.0310833	ABCC1/ATM/ELAVL1/HMOX1/HSF1/IL6/MAPK14/NFE2L2/ZFP36	9
BP	GO:1905475	regulation of protein localization to membrane	5/172	172/18800	0.021089	0.0555888	0.0312183	ACSL3/HRAS/IFNG/MAPK8/SQSTM1	5
BP	GO:0097305	response to alcohol	6/172	235/18800	0.0212418	0.0559515	0.031422	CDO1/CYBB/DRD4/NQO1/PRKAA1/RGS4	6
BP	GO:0021782	glial cell development	4/172	115/18800	0.021349	0.0561937	0.031558	IFNG/IL6/KRAS/TLR4	4
BP	GO:0030595	leukocyte chemotaxis	6/172	236/18800	0.0216365	0.0563995	0.0316736	DPP4/DUSP1/IL6/MAPK1/MAPK3/OXSR1	6
BP	GO:0006749	glutathione metabolic process	3/172	65/18800	0.0217292	0.0563995	0.0316736	GCLC/GPX4/NFE2L2	3
BP	GO:0010965	regulation of mitotic sister chromatid separation	3/172	65/18800	0.0217292	0.0563995	0.0316736	ATM/DUSP1/RB1	3
BP	GO:0031343	positive regulation of cell killing	3/172	65/18800	0.0217292	0.0563995	0.0316736	IFNG/MAPK8/NOS2	3
BP	GO:0035914	skeletal muscle cell differentiation	3/172	65/18800	0.0217292	0.0563995	0.0316736	ARNTL/ATF3/RB1	3
BP	GO:0042093	T-helper cell differentiation	3/172	65/18800	0.0217292	0.0563995	0.0316736	IL6/MYB/STAT3	3
BP	GO:0042446	hormone biosynthetic process	3/172	65/18800	0.0217292	0.0563995	0.0316736	DUOX1/HIF1A/HSD17B11	3
BP	GO:0044784	metaphase/anaphase transition of cell cycle	3/172	65/18800	0.0217292	0.0563995	0.0316736	ATM/DUSP1/RB1	3
BP	GO:0051310	metaphase plate congression	3/172	65/18800	0.0217292	0.0563995	0.0316736	BECN1/CHMP5/CHMP6	3
BP	GO:0072577	endothelial cell apoptotic process	3/172	65/18800	0.0217292	0.0563995	0.0316736	MAP3K5/NFE2L2/TNFAIP3	3
BP	GO:0035336	long-chain fatty-acyl-CoA metabolic process	2/172	25/18800	0.0217486	0.0563995	0.0316736	ACSL3/ACSL4	2
BP	GO:0035821	modulation of process of another organism	2/172	25/18800	0.0217486	0.0563995	0.0316736	IFNG/NOS2	2
BP	GO:0036119	response to platelet-derived growth factor	2/172	25/18800	0.0217486	0.0563995	0.0316736	SRC/TLR4	2
BP	GO:0046949	fatty-acyl-CoA biosynthetic process	2/172	25/18800	0.0217486	0.0563995	0.0316736	ACSL3/ACSL4	2
BP	GO:0051570	regulation of histone H3-K9 methylation	2/172	25/18800	0.0217486	0.0563995	0.0316736	MYB/SIRT1	2
BP	GO:0060396	growth hormone receptor signaling pathway	2/172	25/18800	0.0217486	0.0563995	0.0316736	GDF15/STAT3	2
BP	GO:0061436	establishment of skin barrier	2/172	25/18800	0.0217486	0.0563995	0.0316736	ALOX12/ALOXE3	2
BP	GO:1900078	positive regulation of cellular response to insulin stimulus	2/172	25/18800	0.0217486	0.0563995	0.0316736	SIRT1/SRC	2
BP	GO:1903959	regulation of anion transmembrane transport	2/172	25/18800	0.0217486	0.0563995	0.0316736	RGS4/RIPK1	2
BP	GO:1905523	positive regulation of macrophage migration	2/172	25/18800	0.0217486	0.0563995	0.0316736	MAPK1/MAPK3	2
BP	GO:1905564	positive regulation of vascular endothelial cell proliferation	2/172	25/18800	0.0217486	0.0563995	0.0316736	SP1/STAT3	2
BP	GO:0000280	nuclear division	9/172	446/18800	0.0218045	0.0565046	0.0317326	ATM/AURKA/BECN1/CHMP5/CHMP6/DUSP1/FANCD2/RB1/SLC2A8	9
BP	GO:0044106	cellular amine metabolic process	4/172	116/18800	0.0219584	0.0568235	0.0319118	DRD4/EPAS1/GCH1/SAT1	4
BP	GO:0071675	regulation of mononuclear cell migration	4/172	116/18800	0.0219584	0.0568235	0.0319118	DUSP1/MAPK1/MAPK3/OXSR1	4
BP	GO:0032409	regulation of transporter activity	7/172	305/18800	0.0223993	0.0579238	0.0325296	CAV1/DRD4/IFNG/KLHL24/OXSR1/RIPK1/YWHAE	7
BP	GO:0006694	steroid biosynthetic process	5/172	175/18800	0.0225263	0.058154	0.0326589	HSD17B11/IFNG/PRKAA1/SCP2/SIRT1	5
BP	GO:0032609	interferon-gamma production	4/172	117/18800	0.0225783	0.058154	0.0326589	DDIT3/HRAS/SLC7A5/TLR4	4
BP	GO:0032649	regulation of interferon-gamma production	4/172	117/18800	0.0225783	0.058154	0.0326589	DDIT3/HRAS/SLC7A5/TLR4	4
BP	GO:0015909	long-chain fatty acid transport	3/172	66/18800	0.0226145	0.058154	0.0326589	ACSL3/DRD4/SLC2A1	3
BP	GO:0030193	regulation of blood coagulation	3/172	66/18800	0.0226145	0.058154	0.0326589	ALOX12/CAV1/NFE2L2	3
BP	GO:0043489	RNA stabilization	3/172	66/18800	0.0226145	0.058154	0.0326589	ELAVL1/MAPK14/ZFP36	3
BP	GO:1902373	negative regulation of mRNA catabolic process	3/172	66/18800	0.0226145	0.058154	0.0326589	ELAVL1/MAPK14/ZFP36	3
BP	GO:2000514	regulation of CD4-positive, alpha-beta T cell activation	3/172	66/18800	0.0226145	0.058154	0.0326589	IFNG/MYB/SOCS1	3
BP	GO:0030278	regulation of ossification	4/172	118/18800	0.0232089	0.0596406	0.0334938	HIF1A/MAPK1/MAPK14/MAPK3	4
BP	GO:0000737	DNA catabolic process, endonucleolytic	2/172	26/18800	0.0234214	0.0597715	0.0335673	HSF1/IL6	2
BP	GO:0016226	iron-sulfur cluster assembly	2/172	26/18800	0.0234214	0.0597715	0.0335673	ISCU/NFS1	2
BP	GO:0030878	thyroid gland development	2/172	26/18800	0.0234214	0.0597715	0.0335673	MAPK1/MAPK3	2
BP	GO:0031163	metallo-sulfur cluster assembly	2/172	26/18800	0.0234214	0.0597715	0.0335673	ISCU/NFS1	2
BP	GO:0046755	viral budding	2/172	26/18800	0.0234214	0.0597715	0.0335673	CHMP5/CHMP6	2
BP	GO:0060259	regulation of feeding behavior	2/172	26/18800	0.0234214	0.0597715	0.0335673	EIF2AK4/STAT3	2
BP	GO:0071378	cellular response to growth hormone stimulus	2/172	26/18800	0.0234214	0.0597715	0.0335673	GDF15/STAT3	2
BP	GO:0071549	cellular response to dexamethasone stimulus	2/172	26/18800	0.0234214	0.0597715	0.0335673	DDIT4/PCK2	2
BP	GO:0048015	phosphatidylinositol-mediated signaling	5/172	177/18800	0.0235189	0.0597715	0.0335673	BECN1/FLT3/PIK3CA/SIRT1/SRC	5
BP	GO:0052126	movement in host environment	5/172	177/18800	0.0235189	0.0597715	0.0335673	CAV1/CHMP5/CHMP6/SLC1A5/SRC	5
BP	GO:0032024	positive regulation of insulin secretion	3/172	67/18800	0.0235193	0.0597715	0.0335673	ACSL4/HIF1A/PCK2	3
BP	GO:0045600	positive regulation of fat cell differentiation	3/172	67/18800	0.0235193	0.0597715	0.0335673	MAPK14/PTGS2/ZFP36	3
BP	GO:0046637	regulation of alpha-beta T cell differentiation	3/172	67/18800	0.0235193	0.0597715	0.0335673	IFNG/MYB/SOCS1	3
BP	GO:0051851	modulation by host of symbiont process	3/172	67/18800	0.0235193	0.0597715	0.0335673	EIF2AK4/JUN/SP1	3
BP	GO:0051926	negative regulation of calcium ion transport	3/172	67/18800	0.0235193	0.0597715	0.0335673	DRD4/PTGS2/YWHAE	3
BP	GO:1904377	positive regulation of protein localization to cell periphery	3/172	67/18800	0.0235193	0.0597715	0.0335673	ACSL3/IFNG/SQSTM1	3
BP	GO:0051897	positive regulation of protein kinase B signaling	4/172	119/18800	0.02385	0.0605702	0.0340158	GDF15/MTDH/PIK3CA/SRC	4
BP	GO:0042987	amyloid precursor protein catabolic process	3/172	68/18800	0.0244435	0.0618643	0.0347426	IFNG/RELA/SP1	3
BP	GO:0043627	response to estrogen	3/172	68/18800	0.0244435	0.0618643	0.0347426	CAV1/HMOX1/NCOA4	3
BP	GO:0051306	mitotic sister chromatid separation	3/172	68/18800	0.0244435	0.0618643	0.0347426	ATM/DUSP1/RB1	3
BP	GO:0072665	protein localization to vacuole	3/172	68/18800	0.0244435	0.0618643	0.0347426	LAMP2/NCOA4/TNFAIP3	3
BP	GO:1900046	regulation of hemostasis	3/172	68/18800	0.0244435	0.0618643	0.0347426	ALOX12/CAV1/NFE2L2	3
BP	GO:0002702	positive regulation of production of molecular mediator of immune response	4/172	120/18800	0.0245018	0.061937	0.0347834	IL6/SIRT1/SLC7A5/TLR4	4
BP	GO:0006813	potassium ion transport	6/172	243/18800	0.0245384	0.061937	0.0347834	ATF4/CAV1/KLHL24/OXSR1/RGS4/YWHAE	6
BP	GO:0030324	lung development	5/172	179/18800	0.0245395	0.061937	0.0347834	EPAS1/FBXW7/KRAS/MAPK1/MAPK3	5
BP	GO:0050777	negative regulation of immune response	5/172	179/18800	0.0245395	0.061937	0.0347834	ALOX15/HMOX1/MAPK14/SRC/TNFAIP3	5
BP	GO:0001963	synaptic transmission, dopaminergic	2/172	27/18800	0.0251452	0.0629964	0.0353784	DRD4/PTGS2	2
BP	GO:0002675	positive regulation of acute inflammatory response	2/172	27/18800	0.0251452	0.0629964	0.0353784	IL6/PTGS2	2
BP	GO:0010460	positive regulation of heart rate	2/172	27/18800	0.0251452	0.0629964	0.0353784	GCH1/RGS4	2
BP	GO:0010586	miRNA metabolic process	2/172	27/18800	0.0251452	0.0629964	0.0353784	HRAS/RELA	2
BP	GO:0010758	regulation of macrophage chemotaxis	2/172	27/18800	0.0251452	0.0629964	0.0353784	MAPK1/MAPK3	2
BP	GO:0010875	positive regulation of cholesterol efflux	2/172	27/18800	0.0251452	0.0629964	0.0353784	CAV1/SIRT1	2
BP	GO:0030262	apoptotic nuclear changes	2/172	27/18800	0.0251452	0.0629964	0.0353784	HSF1/IL6	2
BP	GO:1903055	positive regulation of extracellular matrix organization	2/172	27/18800	0.0251452	0.0629964	0.0353784	IL6/RB1	2
BP	GO:2000108	positive regulation of leukocyte apoptotic process	2/172	27/18800	0.0251452	0.0629964	0.0353784	SIRT1/TP53	2
BP	GO:0007041	lysosomal transport	4/172	121/18800	0.0251644	0.0629964	0.0353784	CHMP5/CHMP6/LAMP2/NCOA4	4
BP	GO:0009308	amine metabolic process	4/172	121/18800	0.0251644	0.0629964	0.0353784	DRD4/EPAS1/GCH1/SAT1	4
BP	GO:0030282	bone mineralization	4/172	121/18800	0.0251644	0.0629964	0.0353784	ALOX15/ATF4/HIF1A/PTGS2	4
BP	GO:0009259	ribonucleotide metabolic process	8/172	384/18800	0.0252541	0.0631351	0.0354563	ACSL3/ACSL4/DDIT4/HIF1A/IFNG/PRKAA1/SLC2A6/STAT3	8
BP	GO:0050900	leukocyte migration	8/172	384/18800	0.0252541	0.0631351	0.0354563	DPP4/DUSP1/HMOX1/IL6/MAPK1/MAPK3/OXSR1/SRC	8
BP	GO:0015807	L-amino acid transport	3/172	69/18800	0.0253872	0.0632962	0.0355467	SLC1A5/SLC38A1/SLC7A5	3
BP	GO:0046635	positive regulation of alpha-beta T cell activation	3/172	69/18800	0.0253872	0.0632962	0.0355467	IFNG/MYB/SOCS1	3
BP	GO:0050795	regulation of behavior	3/172	69/18800	0.0253872	0.0632962	0.0355467	ARRDC3/EIF2AK4/STAT3	3
BP	GO:0070527	platelet aggregation	3/172	69/18800	0.0253872	0.0632962	0.0355467	ALOX12/HSPB1/IL6	3
BP	GO:0048017	inositol lipid-mediated signaling	5/172	181/18800	0.0255881	0.0637541	0.0358039	BECN1/FLT3/PIK3CA/SIRT1/SRC	5
BP	GO:0050728	negative regulation of inflammatory response	5/172	182/18800	0.0261231	0.0650429	0.0365277	MAPK14/RB1/SRC/TNFAIP3/ZFP36	5
BP	GO:0042698	ovulation cycle	3/172	70/18800	0.0263502	0.0655199	0.0367956	HSPA5/SIRT1/SRC	3
BP	GO:0061077	chaperone-mediated protein folding	3/172	70/18800	0.0263502	0.0655199	0.0367956	DNAJB6/HSPA5/HSPB1	3
BP	GO:0002244	hematopoietic progenitor cell differentiation	4/172	123/18800	0.0265216	0.0659017	0.03701	FLT3/MYB/NFE2L2/TP53	4
BP	GO:0008217	regulation of blood pressure	5/172	183/18800	0.0266651	0.066169	0.0371601	GCH1/HMOX1/NOS2/NOX1/PTGS2	5
BP	GO:0030323	respiratory tube development	5/172	183/18800	0.0266651	0.066169	0.0371601	EPAS1/FBXW7/KRAS/MAPK1/MAPK3	5
BP	GO:0019058	viral life cycle	7/172	317/18800	0.0269059	0.0661757	0.0371638	ATG16L1/ATG5/CAV1/CHMP5/CHMP6/EIF2AK4/SLC1A5	7
BP	GO:0014072	response to isoquinoline alkaloid	2/172	28/18800	0.0269192	0.0661757	0.0371638	MAP1LC3A/RGS4	2
BP	GO:0019076	viral release from host cell	2/172	28/18800	0.0269192	0.0661757	0.0371638	CHMP5/CHMP6	2
BP	GO:0032703	negative regulation of interleukin-2 production	2/172	28/18800	0.0269192	0.0661757	0.0371638	TNFAIP3/ZFP36	2
BP	GO:0035890	exit from host	2/172	28/18800	0.0269192	0.0661757	0.0371638	CHMP5/CHMP6	2
BP	GO:0035891	exit from host cell	2/172	28/18800	0.0269192	0.0661757	0.0371638	CHMP5/CHMP6	2
BP	GO:0043278	response to morphine	2/172	28/18800	0.0269192	0.0661757	0.0371638	MAP1LC3A/RGS4	2
BP	GO:0048873	homeostasis of number of cells within a tissue	2/172	28/18800	0.0269192	0.0661757	0.0371638	FH/KRAS	2
BP	GO:0060544	regulation of necroptotic process	2/172	28/18800	0.0269192	0.0661757	0.0371638	CAV1/RIPK1	2
BP	GO:0072539	T-helper 17 cell differentiation	2/172	28/18800	0.0269192	0.0661757	0.0371638	IL6/STAT3	2
BP	GO:0090330	regulation of platelet aggregation	2/172	28/18800	0.0269192	0.0661757	0.0371638	ALOX12/IL6	2
BP	GO:1901017	negative regulation of potassium ion transmembrane transporter activity	2/172	28/18800	0.0269192	0.0661757	0.0371638	CAV1/OXSR1	2
BP	GO:1903205	regulation of hydrogen peroxide-induced cell death	2/172	28/18800	0.0269192	0.0661757	0.0371638	NFE2L2/RIPK1	2
BP	GO:1903319	positive regulation of protein maturation	2/172	28/18800	0.0269192	0.0661757	0.0371638	SRC/TFR2	2
BP	GO:0042177	negative regulation of protein catabolic process	4/172	124/18800	0.0272164	0.0667727	0.0374991	GABARAPL2/NOS2/PML/RELA	4
BP	GO:0046660	female sex differentiation	4/172	124/18800	0.0272164	0.0667727	0.0374991	ATM/HSPA5/SIRT1/SRC	4
BP	GO:1904375	regulation of protein localization to cell periphery	4/172	124/18800	0.0272164	0.0667727	0.0374991	ACSL3/HRAS/IFNG/SQSTM1	4
BP	GO:0050818	regulation of coagulation	3/172	71/18800	0.0273326	0.0670131	0.0376341	ALOX12/CAV1/NFE2L2	3
BP	GO:0007565	female pregnancy	5/172	185/18800	0.0277707	0.0680419	0.0382119	ACSL4/ACVR1B/PTGS2/SLC2A1/SLC38A1	5
BP	GO:0043244	regulation of protein-containing complex disassembly	4/172	125/18800	0.0279221	0.0683673	0.0383947	ATG5/BNIP3/CAPG/PIK3CA	4
BP	GO:0033143	regulation of intracellular steroid hormone receptor signaling pathway	3/172	72/18800	0.0283344	0.0691929	0.0388583	ARNTL/SIRT1/SRC	3
BP	GO:0050810	regulation of steroid biosynthetic process	3/172	72/18800	0.0283344	0.0691929	0.0388583	IFNG/PRKAA1/SIRT1	3
BP	GO:1903036	positive regulation of response to wounding	3/172	72/18800	0.0283344	0.0691929	0.0388583	DUOX1/HRAS/NFE2L2	3
BP	GO:1905818	regulation of chromosome separation	3/172	72/18800	0.0283344	0.0691929	0.0388583	ATM/DUSP1/RB1	3
BP	GO:0002021	response to dietary excess	2/172	29/18800	0.0287422	0.0697728	0.039184	GDF15/MAPK14	2
BP	GO:0002068	glandular epithelial cell development	2/172	29/18800	0.0287422	0.0697728	0.039184	ARNTL/HNF4A	2
BP	GO:0003309	type B pancreatic cell differentiation	2/172	29/18800	0.0287422	0.0697728	0.039184	ARNTL/HNF4A	2
BP	GO:0006921	cellular component disassembly involved in execution phase of apoptosis	2/172	29/18800	0.0287422	0.0697728	0.039184	HSF1/IL6	2
BP	GO:0010447	response to acidic pH	2/172	29/18800	0.0287422	0.0697728	0.039184	NOX1/SRC	2
BP	GO:0010667	negative regulation of cardiac muscle cell apoptotic process	2/172	29/18800	0.0287422	0.0697728	0.039184	HSF1/NFE2L2	2
BP	GO:0033561	regulation of water loss via skin	2/172	29/18800	0.0287422	0.0697728	0.039184	ALOX12/ALOXE3	2
BP	GO:0043153	entrainment of circadian clock by photoperiod	2/172	29/18800	0.0287422	0.0697728	0.039184	PML/TP53	2
BP	GO:0090169	regulation of spindle assembly	2/172	29/18800	0.0287422	0.0697728	0.039184	CHMP5/CHMP6	2
BP	GO:0019693	ribose phosphate metabolic process	8/172	394/18800	0.0288216	0.0699195	0.0392664	ACSL3/ACSL4/DDIT4/HIF1A/IFNG/PRKAA1/SLC2A6/STAT3	8
BP	GO:0033555	multicellular organismal response to stress	3/172	73/18800	0.0293554	0.0710061	0.0398766	DPP4/DRD4/GCH1	3
BP	GO:0043462	regulation of ATP-dependent activity	3/172	73/18800	0.0293554	0.0710061	0.0398766	GABARAPL2/SIRT1/TP53	3
BP	GO:0043967	histone H4 acetylation	3/172	73/18800	0.0293554	0.0710061	0.0398766	ATG5/MUC1/SIRT1	3
BP	GO:0034968	histone lysine methylation	4/172	127/18800	0.0293659	0.0710061	0.0398766	BRD4/MYB/SETD1B/SIRT1	4
BP	GO:0050852	T cell receptor signaling pathway	4/172	127/18800	0.0293659	0.0710061	0.0398766	HRAS/MAPK1/PIK3CA/RELA	4
BP	GO:0002819	regulation of adaptive immune response	5/172	188/18800	0.0294831	0.071196	0.0399832	ALOX15/EIF2AK4/IL6/SIRT1/TNFAIP3	5
BP	GO:0006575	cellular modified amino acid metabolic process	5/172	188/18800	0.0294831	0.071196	0.0399832	DUOX1/GCH1/GCLC/GPX4/NFE2L2	5
BP	GO:0040013	negative regulation of locomotion	8/172	396/18800	0.0295749	0.0713711	0.0400816	ALOX15B/ARRDC3/DPP4/DUSP1/HMOX1/NF2/NFE2L2/STAT3	8
BP	GO:0050714	positive regulation of protein secretion	4/172	128/18800	0.0301042	0.0726007	0.0407721	ACSL4/HIF1A/PCK2/TLR4	4
BP	GO:0050688	regulation of defense response to virus	3/172	74/18800	0.0303958	0.0731298	0.0410692	ATG5/EIF2AK4/TNFAIP3	3
BP	GO:0140115	export across plasma membrane	3/172	74/18800	0.0303958	0.0731298	0.0410692	ABCC1/SLC40A1/YWHAE	3
BP	GO:0001975	response to amphetamine	2/172	30/18800	0.0306132	0.0731298	0.0410692	DRD4/RGS4	2
BP	GO:0007176	regulation of epidermal growth factor-activated receptor activity	2/172	30/18800	0.0306132	0.0731298	0.0410692	CHMP6/FBXW7	2
BP	GO:0033198	response to ATP	2/172	30/18800	0.0306132	0.0731298	0.0410692	PANX1/PTGS2	2
BP	GO:0036258	multivesicular body assembly	2/172	30/18800	0.0306132	0.0731298	0.0410692	CHMP5/CHMP6	2
BP	GO:0042744	hydrogen peroxide catabolic process	2/172	30/18800	0.0306132	0.0731298	0.0410692	DUOX1/PRDX1	2
BP	GO:0045671	negative regulation of osteoclast differentiation	2/172	30/18800	0.0306132	0.0731298	0.0410692	FBXW7/TLR4	2
BP	GO:0048147	negative regulation of fibroblast proliferation	2/172	30/18800	0.0306132	0.0731298	0.0410692	FTH1/TP53	2
BP	GO:0060142	regulation of syncytium formation by plasma membrane fusion	2/172	30/18800	0.0306132	0.0731298	0.0410692	GDF15/MAPK14	2
BP	GO:0060218	hematopoietic stem cell differentiation	2/172	30/18800	0.0306132	0.0731298	0.0410692	NFE2L2/TP53	2
BP	GO:0060603	mammary gland duct morphogenesis	2/172	30/18800	0.0306132	0.0731298	0.0410692	PML/SRC	2
BP	GO:0086011	membrane repolarization during action potential	2/172	30/18800	0.0306132	0.0731298	0.0410692	CAV1/YWHAE	2
BP	GO:0090140	regulation of mitochondrial fission	2/172	30/18800	0.0306132	0.0731298	0.0410692	AURKA/BNIP3	2
BP	GO:0007369	gastrulation	5/172	190/18800	0.0306609	0.0731298	0.0410692	DUSP1/HNF4A/NF2/TP53/TXNRD1	5
BP	GO:0009755	hormone-mediated signaling pathway	5/172	190/18800	0.0306609	0.0731298	0.0410692	ARNTL/EGLN2/NCOA4/SIRT1/SRC	5
BP	GO:0060401	cytosolic calcium ion transport	5/172	190/18800	0.0306609	0.0731298	0.0410692	ATG5/CAV1/DDIT3/PML/YWHAE	5
BP	GO:0002768	immune response-regulating cell surface receptor signaling pathway	7/172	328/18800	0.0315484	0.0751978	0.0422307	HRAS/MAPK1/MAPK8/MAPK9/PIK3CA/RELA/SRC	7
BP	GO:0007127	meiosis I	4/172	130/18800	0.0316134	0.0752069	0.0422357	ATM/AURKA/FANCD2/SLC2A8	4
BP	GO:0017015	regulation of transforming growth factor beta receptor signaling pathway	4/172	130/18800	0.0316134	0.0752069	0.0422357	CAV1/HSPA5/SIRT1/TP53	4
BP	GO:0035303	regulation of dephosphorylation	4/172	130/18800	0.0316134	0.0752069	0.0422357	IFNG/LPIN1/SRC/YWHAE	4
BP	GO:0048638	regulation of developmental growth	7/172	329/18800	0.0319955	0.0760667	0.0427186	CDKN1A/GDF15/MAPK14/PIK3CA/RGS4/STAT3/ULK2	7
BP	GO:0090150	establishment of protein localization to membrane	6/172	259/18800	0.032122	0.0763182	0.0428598	ACSL3/ATG3/BID/HRAS/HSPA5/MAPK8	6
BP	GO:0007098	centrosome cycle	4/172	131/18800	0.0323845	0.0766972	0.0430727	AURKA/CHMP5/SIRT1/TUBE1	4
BP	GO:0001782	B cell homeostasis	2/172	31/18800	0.0325313	0.0766972	0.0430727	HIF1A/TNFAIP3	2
BP	GO:0002862	negative regulation of inflammatory response to antigenic stimulus	2/172	31/18800	0.0325313	0.0766972	0.0430727	MAPK14/SRC	2
BP	GO:0010664	negative regulation of striated muscle cell apoptotic process	2/172	31/18800	0.0325313	0.0766972	0.0430727	HSF1/NFE2L2	2
BP	GO:0033137	negative regulation of peptidyl-serine phosphorylation	2/172	31/18800	0.0325313	0.0766972	0.0430727	CAV1/DDIT4	2
BP	GO:0034508	centromere complex assembly	2/172	31/18800	0.0325313	0.0766972	0.0430727	HELLS/RB1	2
BP	GO:0035066	positive regulation of histone acetylation	2/172	31/18800	0.0325313	0.0766972	0.0430727	MAPK3/MUC1	2
BP	GO:0036257	multivesicular body organization	2/172	31/18800	0.0325313	0.0766972	0.0430727	CHMP5/CHMP6	2
BP	GO:0061099	negative regulation of protein tyrosine kinase activity	2/172	31/18800	0.0325313	0.0766972	0.0430727	CAV1/CHMP6	2
BP	GO:0140718	facultative heterochromatin assembly	2/172	31/18800	0.0325313	0.0766972	0.0430727	HELLS/SIRT1	2
BP	GO:1900027	regulation of ruffle assembly	2/172	31/18800	0.0325313	0.0766972	0.0430727	CAV1/HRAS	2
BP	GO:1902042	negative regulation of extrinsic apoptotic signaling pathway via death domain receptors	2/172	31/18800	0.0325313	0.0766972	0.0430727	HMOX1/TNFAIP3	2
BP	GO:1903522	regulation of blood circulation	6/172	260/18800	0.0326413	0.0769073	0.0431907	CAV1/EPAS1/GCH1/PTGS2/RGS4/YWHAE	6
BP	GO:0060537	muscle tissue development	8/172	405/18800	0.0331333	0.0780168	0.0438138	ARNTL/ATF3/ATG5/CAV1/MAPK14/PRKAA1/RB1/RGS4	8
BP	GO:0010565	regulation of cellular ketone metabolic process	4/172	132/18800	0.0331665	0.078045	0.0438296	CAV1/PTGS2/SIRT1/TRIB3	4
BP	GO:0032729	positive regulation of interferon-gamma production	3/172	77/18800	0.0336322	0.0790905	0.0444167	HRAS/SLC7A5/TLR4	3
BP	GO:0051216	cartilage development	5/172	195/18800	0.0337339	0.0792285	0.0444942	CD44/HIF1A/MAPK14/MAPK3/RB1	5
BP	GO:0120032	regulation of plasma membrane bounded cell projection assembly	5/172	195/18800	0.0337339	0.0792285	0.0444942	ATG3/ATG5/CAV1/HRAS/PIK3CA	5
BP	GO:1903844	regulation of cellular response to transforming growth factor beta stimulus	4/172	133/18800	0.0339595	0.0797075	0.0447633	CAV1/HSPA5/SIRT1/TP53	4
BP	GO:0007517	muscle organ development	7/172	334/18800	0.0342947	0.0803001	0.045096	ARNTL/ATF3/CAV1/MAPK14/PRKAA1/RB1/SIRT1	7
BP	GO:0001516	prostaglandin biosynthetic process	2/172	32/18800	0.0344952	0.0803001	0.045096	PTGS2/SIRT1	2
BP	GO:0010165	response to X-ray	2/172	32/18800	0.0344952	0.0803001	0.045096	ATM/TP53	2
BP	GO:0010743	regulation of macrophage derived foam cell differentiation	2/172	32/18800	0.0344952	0.0803001	0.045096	ALOX15B/MAPK9	2
BP	GO:0032509	endosome transport via multivesicular body sorting pathway	2/172	32/18800	0.0344952	0.0803001	0.045096	CHMP5/CHMP6	2
BP	GO:0033028	myeloid cell apoptotic process	2/172	32/18800	0.0344952	0.0803001	0.045096	IL6/SIRT1	2
BP	GO:0035883	enteroendocrine cell differentiation	2/172	32/18800	0.0344952	0.0803001	0.045096	ARNTL/HNF4A	2
BP	GO:0036474	cell death in response to hydrogen peroxide	2/172	32/18800	0.0344952	0.0803001	0.045096	NFE2L2/RIPK1	2
BP	GO:0043304	regulation of mast cell degranulation	2/172	32/18800	0.0344952	0.0803001	0.045096	HMOX1/SNX4	2
BP	GO:0046457	prostanoid biosynthetic process	2/172	32/18800	0.0344952	0.0803001	0.045096	PTGS2/SIRT1	2
BP	GO:0050685	positive regulation of mRNA processing	2/172	32/18800	0.0344952	0.0803001	0.045096	HSF1/PRDX6	2
BP	GO:0051385	response to mineralocorticoid	2/172	32/18800	0.0344952	0.0803001	0.045096	CYBB/SRC	2
BP	GO:1902235	regulation of endoplasmic reticulum stress-induced intrinsic apoptotic signaling pathway	2/172	32/18800	0.0344952	0.0803001	0.045096	DDIT3/SIRT1	2
BP	GO:0010827	regulation of glucose transmembrane transport	3/172	78/18800	0.0347493	0.0806916	0.0453159	MAPK14/NFE2L2/TRIB3	3
BP	GO:0090049	regulation of cell migration involved in sprouting angiogenesis	3/172	78/18800	0.0347493	0.0806916	0.0453159	FBXW7/HMOX1/PTGS2	3
BP	GO:1902369	negative regulation of RNA catabolic process	3/172	78/18800	0.0347493	0.0806916	0.0453159	ELAVL1/MAPK14/ZFP36	3
BP	GO:0006661	phosphatidylinositol biosynthetic process	4/172	134/18800	0.0347635	0.0806916	0.0453159	ATM/BECN1/PIK3CA/SOCS1	4
BP	GO:0007611	learning or memory	6/172	264/18800	0.0347729	0.0806916	0.0453159	EIF2AK4/HIF1A/KRAS/MAPK1/PTGS2/VLDLR	6
BP	GO:0030111	regulation of Wnt signaling pathway	7/172	336/18800	0.0352445	0.081683	0.0458727	ARNTL/CAV1/DDIT3/HIC1/MAPK14/SRC/TNFAIP3	7
BP	GO:0042113	B cell activation	7/172	336/18800	0.0352445	0.081683	0.0458727	ATM/CDKN1A/FLT3/IL6/TLR4/TNFAIP3/TP53	7
BP	GO:0090066	regulation of anatomical structure size	9/172	487/18800	0.0354625	0.0821366	0.0461274	ALOX15/ATG5/CAPG/CAV1/GCH1/GCLC/PIK3CA/PTGS2/ULK2	9
BP	GO:0090101	negative regulation of transmembrane receptor protein serine/threonine kinase signaling pathway	4/172	135/18800	0.0355785	0.0823536	0.0462493	CAV1/HSPA5/SIRT1/TP53	4
BP	GO:0031060	regulation of histone methylation	3/172	79/18800	0.0358855	0.0829598	0.0465897	BRD4/MYB/SIRT1	3
BP	GO:0034637	cellular carbohydrate biosynthetic process	3/172	79/18800	0.0358855	0.0829598	0.0465897	GOT1/PCK2/PHKG2	3
BP	GO:0071674	mononuclear cell migration	5/172	199/18800	0.0363256	0.0836035	0.0469512	DUSP1/IL6/MAPK1/MAPK3/OXSR1	5
BP	GO:0061982	meiosis I cell cycle process	4/172	136/18800	0.0364046	0.0836035	0.0469512	ATM/AURKA/FANCD2/SLC2A8	4
BP	GO:0090092	regulation of transmembrane receptor protein serine/threonine kinase signaling pathway	6/172	267/18800	0.0364295	0.0836035	0.0469512	ACVR1B/CAV1/GDF15/HSPA5/SIRT1/TP53	6
BP	GO:0001662	behavioral fear response	2/172	33/18800	0.0365042	0.0836035	0.0469512	DPP4/DRD4	2
BP	GO:0007143	female meiotic nuclear division	2/172	33/18800	0.0365042	0.0836035	0.0469512	ATM/AURKA	2
BP	GO:0009648	photoperiodism	2/172	33/18800	0.0365042	0.0836035	0.0469512	PML/TP53	2
BP	GO:0032633	interleukin-4 production	2/172	33/18800	0.0365042	0.0836035	0.0469512	DDIT3/SLC7A5	2
BP	GO:0032673	regulation of interleukin-4 production	2/172	33/18800	0.0365042	0.0836035	0.0469512	DDIT3/SLC7A5	2
BP	GO:0043552	positive regulation of phosphatidylinositol 3-kinase activity	2/172	33/18800	0.0365042	0.0836035	0.0469512	FLT3/SRC	2
BP	GO:0045736	negative regulation of cyclin-dependent protein serine/threonine kinase activity	2/172	33/18800	0.0365042	0.0836035	0.0469512	CDKN1A/TNFAIP3	2
BP	GO:0045907	positive regulation of vasoconstriction	2/172	33/18800	0.0365042	0.0836035	0.0469512	CAV1/PTGS2	2
BP	GO:0045940	positive regulation of steroid metabolic process	2/172	33/18800	0.0365042	0.0836035	0.0469512	IFNG/PRKAA1	2
BP	GO:0070050	neuron cellular homeostasis	2/172	33/18800	0.0365042	0.0836035	0.0469512	IL6/PRKAA1	2
BP	GO:0070229	negative regulation of lymphocyte apoptotic process	2/172	33/18800	0.0365042	0.0836035	0.0469512	HIF1A/TSC22D3	2
BP	GO:1904030	negative regulation of cyclin-dependent protein kinase activity	2/172	33/18800	0.0365042	0.0836035	0.0469512	CDKN1A/TNFAIP3	2
BP	GO:0050864	regulation of B cell activation	5/172	200/18800	0.0369922	0.0846172	0.0475205	ATM/CDKN1A/IL6/TLR4/TNFAIP3	5
BP	GO:0031348	negative regulation of defense response	6/172	268/18800	0.0369927	0.0846172	0.0475205	ATG5/MAPK14/RB1/SRC/TNFAIP3/ZFP36	6
BP	GO:0031346	positive regulation of cell projection organization	7/172	341/18800	0.0376949	0.0861698	0.0483924	ENPP2/HRAS/HSPA5/NFE2L2/PIK3CA/SRC/VLDLR	7
BP	GO:0006446	regulation of translational initiation	3/172	81/18800	0.0382146	0.0872496	0.0489989	ATF4/EIF2AK4/HSPB1	3
BP	GO:0031016	pancreas development	3/172	81/18800	0.0382146	0.0872496	0.0489989	ARNTL/HNF4A/IL6	3
BP	GO:0072503	cellular divalent inorganic cation homeostasis	9/172	494/18800	0.0382768	0.0873284	0.0490431	ATF4/ATG5/BNIP3/CAV1/DDIT3/DRD4/MT1G/PML/YWHAE	9
BP	GO:0002209	behavioral defense response	2/172	34/18800	0.0385572	0.0873284	0.0490431	DPP4/DRD4	2
BP	GO:0006691	leukotriene metabolic process	2/172	34/18800	0.0385572	0.0873284	0.0490431	ABCC1/ALOX12	2
BP	GO:0009649	entrainment of circadian clock	2/172	34/18800	0.0385572	0.0873284	0.0490431	PML/TP53	2
BP	GO:0033006	regulation of mast cell activation involved in immune response	2/172	34/18800	0.0385572	0.0873284	0.0490431	HMOX1/SNX4	2
BP	GO:0043162	ubiquitin-dependent protein catabolic process via the multivesicular body sorting pathway	2/172	34/18800	0.0385572	0.0873284	0.0490431	CHMP5/CHMP6	2
BP	GO:0044273	sulfur compound catabolic process	2/172	34/18800	0.0385572	0.0873284	0.0490431	CBS/CDO1	2
BP	GO:0046475	glycerophospholipid catabolic process	2/172	34/18800	0.0385572	0.0873284	0.0490431	ENPP2/PRDX6	2
BP	GO:0051973	positive regulation of telomerase activity	2/172	34/18800	0.0385572	0.0873284	0.0490431	MAPK1/MAPK3	2
BP	GO:0090322	regulation of superoxide metabolic process	2/172	34/18800	0.0385572	0.0873284	0.0490431	GCH1/NFE2L2	2
BP	GO:1901532	regulation of hematopoietic progenitor cell differentiation	2/172	34/18800	0.0385572	0.0873284	0.0490431	MYB/NFE2L2	2
BP	GO:1902692	regulation of neuroblast proliferation	2/172	34/18800	0.0385572	0.0873284	0.0490431	HIF1A/TP53	2
BP	GO:2000352	negative regulation of endothelial cell apoptotic process	2/172	34/18800	0.0385572	0.0873284	0.0490431	NFE2L2/TNFAIP3	2
BP	GO:0051783	regulation of nuclear division	4/172	139/18800	0.0389489	0.0881614	0.0495109	ATM/AURKA/DUSP1/RB1	4
BP	GO:0002064	epithelial cell development	5/172	203/18800	0.039037	0.0882523	0.049562	ARNTL/ATF4/HIF1A/HNF4A/SRC	5
BP	GO:0060541	respiratory system development	5/172	203/18800	0.039037	0.0882523	0.049562	EPAS1/FBXW7/KRAS/MAPK1/MAPK3	5
CC	GO:0005776	autophagosome	14/172	112/19594	1.07741e-12	3.05985e-10	2.20019e-10	ATG16L1/ATG5/BECN1/CHMP5/CHMP6/FTH1/FTL/GABARAPL1/GABARAPL2/LAMP2/MAP1LC3A/NCOA4/SQSTM1/WIPI1	14
CC	GO:0005767	secondary lysosome	7/172	17/19594	6.41731e-11	9.11258e-09	6.55241e-09	FTH1/FTL/LAMP2/MAP1LC3A/NCF2/NCOA4/SQSTM1	7
CC	GO:0044754	autolysosome	6/172	11/19594	1.86764e-10	1.76804e-08	1.27131e-08	FTH1/FTL/LAMP2/MAP1LC3A/NCOA4/SQSTM1	6
CC	GO:0000407	phagophore assembly site	7/172	33/19594	1.25249e-08	7.85365e-07	5.64717e-07	ATG5/ATG7/BECN1/SQSTM1/ULK2/WIPI1/WIPI2	7
CC	GO:0000421	autophagosome membrane	8/172	51/19594	1.38268e-08	7.85365e-07	5.64717e-07	ATG16L1/CHMP5/CHMP6/GABARAPL1/GABARAPL2/LAMP2/MAP1LC3A/WIPI1	8
CC	GO:0043020	NADPH oxidase complex	4/172	14/19594	5.35883e-06	0.000220603	0.000158625	CYBB/DUOX1/NCF2/NOX1	4
CC	GO:0090575	RNA polymerase II transcription regulator complex	11/172	230/19594	6.17488e-06	0.000220603	0.000158625	ARNTL/ATF3/ATF4/BACH1/DDIT3/HIF1A/JUN/MAFG/NFE2L2/RB1/STAT3	11
CC	GO:0031968	organelle outer membrane	11/172	232/19594	6.70444e-06	0.000220603	0.000158625	ACSL3/ACSL4/BID/BNIP3/CISD1/CISD2/HMOX1/KRAS/LPIN1/PTGS2/UBC	11
CC	GO:0019867	outer membrane	11/172	234/19594	7.2732e-06	0.000220603	0.000158625	ACSL3/ACSL4/BID/BNIP3/CISD1/CISD2/HMOX1/KRAS/LPIN1/PTGS2/UBC	11
CC	GO:0005901	caveola	7/172	82/19594	7.76772e-06	0.000220603	0.000158625	CAV1/HMOX1/MAPK1/MAPK3/PTGS2/SLC2A1/SRC	7
CC	GO:0034045	phagophore assembly site membrane	4/172	17/19594	1.24815e-05	0.000322251	0.000231715	ATG5/ULK2/WIPI1/WIPI2	4
CC	GO:0005741	mitochondrial outer membrane	10/172	205/19594	1.38774e-05	0.000328431	0.000236158	ACSL3/ACSL4/BID/BNIP3/CISD1/CISD2/HMOX1/KRAS/LPIN1/UBC	10
CC	GO:0019898	extrinsic component of membrane	12/172	314/19594	2.23757e-05	0.000488822	0.000351488	ALOX15/ALOX15B/BECN1/KRAS/PIK3CA/PML/SOCS1/SRC/TF/UBC/WIPI1/WIPI2	12
CC	GO:0005667	transcription regulator complex	15/172	483/19594	2.45074e-05	0.000497149	0.000357476	ARNTL/ATF3/ATF4/BACH1/DDIT3/EPAS1/HIF1A/JUN/MAFG/NFE2L2/RB1/RELA/SP1/STAT3/TP53	15
CC	GO:0016605	PML body	7/172	105/19594	3.92743e-05	0.000737578	0.000530357	ARNTL/HSF1/PML/RB1/SIRT1/SQSTM1/TP53	7
CC	GO:0005770	late endosome	11/172	283/19594	4.24401e-05	0.000737578	0.000530357	CHMP5/CHMP6/DDIT3/LAMP2/MAP1LC3A/MAPK1/MAPK3/SQSTM1/SRC/STEAP3/TF	11
CC	GO:0005774	vacuolar membrane	14/172	449/19594	4.41508e-05	0.000737578	0.000530357	ATG16L1/ATP6V1G2/CHMP5/CHMP6/DPP4/GABARAPL1/GABARAPL2/LAMP2/MAP1LC3A/SLC2A6/SLC2A8/SLC7A5/VLDLR/WIPI1	14
CC	GO:0042470	melanosome	7/172	109/19594	4.9928e-05	0.000746292	0.000536622	ATP6V1G2/CAPG/HSPA5/PRDX1/SLC1A5/SLC2A1/YWHAE	7
CC	GO:0048770	pigment granule	7/172	109/19594	4.9928e-05	0.000746292	0.000536622	ATP6V1G2/CAPG/HSPA5/PRDX1/SLC1A5/SLC2A1/YWHAE	7
CC	GO:0044853	plasma membrane raft	7/172	113/19594	6.28417e-05	0.000892352	0.000641647	CAV1/HMOX1/MAPK1/MAPK3/PTGS2/SLC2A1/SRC	7
CC	GO:0044753	amphisome	3/172	13/19594	0.000178196	0.00240989	0.00173283	CHMP5/CHMP6/SQSTM1	3
CC	GO:0016324	apical plasma membrane	11/172	358/19594	0.000334069	0.00420678	0.00302489	ABCC1/CD44/DPP4/DUOX1/MTDH/MUC1/PRKAA1/SLC2A1/SLC38A1/SLC7A5/TF	11
CC	GO:0005925	focal adhesion	12/172	419/19594	0.00034069	0.00420678	0.00302489	ALOX15B/CAV1/CD44/DPP4/HSPA5/HSPB1/KRAS/MAPK1/MAPK3/RPL8/SRC/YWHAE	12
CC	GO:0045177	apical part of cell	12/172	424/19594	0.000378994	0.00438714	0.00315458	ABCC1/CD44/DPP4/DUOX1/MTDH/MUC1/NF2/PRKAA1/SLC2A1/SLC38A1/SLC7A5/TF	12
CC	GO:0009925	basal plasma membrane	9/172	251/19594	0.000386192	0.00438714	0.00315458	ABCC1/CA9/CD44/SLC1A5/SLC2A1/SLC38A1/SLC40A1/SLC7A5/TF	9
CC	GO:0030055	cell-substrate junction	12/172	428/19594	0.000412207	0.00450257	0.00323758	ALOX15B/CAV1/CD44/DPP4/HSPA5/HSPB1/KRAS/MAPK1/MAPK3/RPL8/SRC/YWHAE	12
CC	GO:0061695	transferase complex, transferring phosphorus-containing groups	9/172	259/19594	0.000484802	0.0050994	0.00366673	ACVR1B/BECN1/CDKN1A/MAP3K5/PHKG2/PIK3CA/PRKAA1/SESN2/SOCS1	9
CC	GO:1902911	protein kinase complex	6/172	115/19594	0.000535586	0.00543237	0.00390615	ACVR1B/CDKN1A/MAP3K5/PHKG2/PRKAA1/SESN2	6
CC	GO:0045178	basal part of cell	9/172	269/19594	0.00063628	0.00610738	0.00439152	ABCC1/CA9/CD44/SLC1A5/SLC2A1/SLC38A1/SLC40A1/SLC7A5/TF	9
CC	GO:0098857	membrane microdomain	10/172	327/19594	0.000645146	0.00610738	0.00439152	CAV1/DPP4/HMOX1/LAMP2/MAPK1/MAPK3/PTGS2/RIPK1/SLC2A1/SRC	10
CC	GO:0030139	endocytic vesicle	10/172	342/19594	0.000908742	0.00832525	0.00598628	ATG5/BECN1/CAV1/CYBB/DPP4/LAMP2/NCF2/SLC2A8/TF/UBC	10
CC	GO:0030666	endocytic vesicle membrane	7/172	194/19594	0.00165621	0.0146989	0.0105693	ATG5/CAV1/CYBB/LAMP2/SLC2A8/TF/UBC	7
CC	GO:0005811	lipid droplet	5/172	100/19594	0.00189113	0.0162752	0.0117027	ACSL3/ACSL4/ALOX15/CAV1/HSD17B11	5
CC	GO:0005942	phosphatidylinositol 3-kinase complex	3/172	29/19594	0.00205359	0.0169779	0.012208	BECN1/PIK3CA/SOCS1	3
CC	GO:0030496	midbody	7/172	203/19594	0.00214138	0.0169779	0.012208	AURKA/CAPG/CHMP5/CHMP6/HSPA5/KEAP1/SLC2A1	7
CC	GO:0000791	euchromatin	4/172	62/19594	0.00215213	0.0169779	0.012208	HSF1/JUN/SIRT1/SP1	4
CC	GO:0005769	early endosome	10/172	389/19594	0.00235744	0.0179938	0.0129384	ARRDC3/CAV1/MAPK1/MAPK3/NF2/NOX1/PML/SNX4/TF/TLR4	10
CC	GO:0045121	membrane raft	9/172	326/19594	0.00240762	0.0179938	0.0129384	CAV1/DPP4/HMOX1/MAPK1/MAPK3/PTGS2/RIPK1/SLC2A1/SRC	9
CC	GO:0005819	spindle	10/172	402/19594	0.00298408	0.0217302	0.0156251	ATM/AURKA/CAPG/CHMP5/CHMP6/HSF1/HSPB1/MAPK1/MAPK14/RB1	10
CC	GO:0000792	heterochromatin	4/172	69/19594	0.00318071	0.0225831	0.0162384	HELLS/HSF1/PML/SIRT1	4
CC	GO:0005635	nuclear envelope	11/172	479/19594	0.00345104	0.0239048	0.0171888	BNIP3/CHMP5/CHMP6/CYBB/GCH1/GPX4/LPIN1/MAPK3/MTDH/PTGS2/SIRT1	11
CC	GO:0016323	basolateral plasma membrane	7/172	226/19594	0.00388302	0.0262566	0.0188798	ABCC1/CA9/CD44/SLC2A1/SLC38A1/SLC40A1/SLC7A5	7
CC	GO:1904930	amphisome membrane	2/172	11/19594	0.00399991	0.026418	0.0189959	CHMP5/CHMP6	2
CC	GO:1990204	oxidoreductase complex	5/172	120/19594	0.00416204	0.0268641	0.0193166	CYBB/DUOX1/NCF2/NOX1/RRM2	5
CC	GO:0044232	organelle membrane contact site	3/172	41/19594	0.00554763	0.0338842	0.0243644	ACSL4/ATG16L1/ATG5	3
CC	GO:0005677	chromatin silencing complex	2/172	13/19594	0.00560759	0.0338842	0.0243644	RB1/SIRT1	2
CC	GO:0045120	pronucleus	2/172	13/19594	0.00560759	0.0338842	0.0243644	AURKA/SLC2A1	2
CC	GO:0101002	ficolin-1-rich granule	6/172	185/19594	0.00591673	0.0350073	0.0251721	ATG7/FTH1/LAMP2/MAPK1/MAPK14/SLC2A3	6
CC	GO:0005788	endoplasmic reticulum lumen	8/172	311/19594	0.00630232	0.0365277	0.0262653	ALB/FLT3/HSPA5/IL6/MAPK1/MAPK3/PTGS2/TF	8
CC	GO:0045335	phagocytic vesicle	5/172	138/19594	0.00746715	0.0424134	0.0304974	ATG5/BECN1/CYBB/LAMP2/NCF2	5
CC	GO:0005777	peroxisome	5/172	141/19594	0.00815606	0.0445446	0.0320299	ACSL3/ACSL4/ATM/NOS2/SCP2	5
CC	GO:0042579	microbody	5/172	141/19594	0.00815606	0.0445446	0.0320299	ACSL3/ACSL4/ATM/NOS2/SCP2	5
CC	GO:0005759	mitochondrial matrix	10/172	473/19594	0.00911024	0.0479861	0.0345045	ATG4D/CS/FH/GLS2/GPT2/ISCU/LONP1/NFS1/PCK2/TP53	10
CC	GO:0005765	lysosomal membrane	9/172	404/19594	0.00953782	0.0479861	0.0345045	ATG16L1/CHMP5/CHMP6/DPP4/LAMP2/SLC2A6/SLC2A8/SLC7A5/VLDLR	9
CC	GO:0098852	lytic vacuole membrane	9/172	404/19594	0.00953782	0.0479861	0.0345045	ATG16L1/CHMP5/CHMP6/DPP4/LAMP2/SLC2A6/SLC2A8/SLC7A5/VLDLR	9
CC	GO:0005782	peroxisomal matrix	3/172	50/19594	0.00963102	0.0479861	0.0345045	ATM/NOS2/SCP2	3
CC	GO:0031907	microbody lumen	3/172	50/19594	0.00963102	0.0479861	0.0345045	ATM/NOS2/SCP2	3
CC	GO:0005828	kinetochore microtubule	2/172	18/19594	0.0106878	0.0514465	0.0369927	CHMP5/CHMP6	2
CC	GO:0031143	pseudopodium	2/172	18/19594	0.0106878	0.0514465	0.0369927	MAPK1/MAPK3	2
CC	GO:1902554	serine/threonine protein kinase complex	4/172	99/19594	0.011315	0.0530462	0.0381429	ACVR1B/CDKN1A/PHKG2/SESN2	4
CC	GO:0031252	cell leading edge	9/172	416/19594	0.0113937	0.0530462	0.0381429	ATF4/CAPG/CD44/DPP4/DUOX1/NF2/PIK3CA/SRC/TLR4	9
CC	GO:0044233	mitochondria-associated endoplasmic reticulum membrane	2/172	20/19594	0.0131211	0.0601032	0.0432172	ACSL4/ATG5	2
CC	GO:0097038	perinuclear endoplasmic reticulum	2/172	21/19594	0.0144194	0.0650019	0.0467397	CISD2/CYBB	2
CC	GO:0070820	tertiary granule	5/172	164/19594	0.014954	0.0663585	0.0477151	CYBB/FTH1/LAMP2/NRAS/SLC2A3	5
CC	GO:0031258	lamellipodium membrane	2/172	22/19594	0.0157709	0.0689065	0.0495473	CD44/DPP4	2
MF	GO:0031625	ubiquitin protein ligase binding	24/172	298/18410	6.51711e-16	3.26507e-13	2.44906e-13	ACVR1B/AURKA/BECN1/BID/CBS/CDKN1A/FBXW7/GABARAPL1/GABARAPL2/HIF1A/HSPA5/JUN/MAP1LC3A/PML/PRDX6/RB1/RELA/RIPK1/SQSTM1/TP53/TRIB3/TXNIP/UBC/YWHAE	24
MF	GO:0044389	ubiquitin-like protein ligase binding	24/172	317/18410	2.62409e-15	6.57336e-13	4.93053e-13	ACVR1B/AURKA/BECN1/BID/CBS/CDKN1A/FBXW7/GABARAPL1/GABARAPL2/HIF1A/HSPA5/JUN/MAP1LC3A/PML/PRDX6/RB1/RELA/RIPK1/SQSTM1/TP53/TRIB3/TXNIP/UBC/YWHAE	24
MF	GO:0061629	RNA polymerase II-specific DNA-binding transcription factor binding	23/172	348/18410	1.87125e-13	3.12499e-11	2.34399e-11	ARNTL/ATF4/DDIT3/EPAS1/FLT3/GABARAPL1/HIF1A/HNF4A/HSF1/HSPB1/JUN/KEAP1/MAPK14/MTDH/NFE2L2/RB1/RELA/SIRT1/SP1/SRC/STAT3/TP53/WIPI1	23
MF	GO:0140297	DNA-binding transcription factor binding	23/172	470/18410	8.71442e-11	1.09148e-08	8.18697e-09	ARNTL/ATF4/DDIT3/EPAS1/FLT3/GABARAPL1/HIF1A/HNF4A/HSF1/HSPB1/JUN/KEAP1/MAPK14/MTDH/NFE2L2/RB1/RELA/SIRT1/SP1/SRC/STAT3/TP53/WIPI1	23
MF	GO:0005506	iron ion binding	12/172	151/18410	1.83134e-08	1.835e-06	1.3764e-06	ALOX12/ALOX15/ALOX15B/ALOXE3/CDO1/EGLN2/FTH1/FTL/ISCU/RRM2/SCD/TF	12
MF	GO:0016702	oxidoreductase activity, acting on single donors with incorporation of molecular oxygen, incorporation of two atoms of oxygen	6/172	24/18410	7.13407e-08	5.95695e-06	4.46818e-06	ALOX12/ALOX15/ALOX15B/ALOXE3/CDO1/PTGS2	6
MF	GO:0016701	oxidoreductase activity, acting on single donors with incorporation of molecular oxygen	6/172	25/18410	9.31451e-08	6.01974e-06	4.51528e-06	ALOX12/ALOX15/ALOX15B/ALOXE3/CDO1/PTGS2	6
MF	GO:0016209	antioxidant activity	9/172	85/18410	9.85037e-08	6.01974e-06	4.51528e-06	ALB/DUOX1/GPX4/NQO1/PRDX1/PRDX6/PTGS2/SESN2/TXNRD1	9
MF	GO:0004674	protein serine/threonine kinase activity	18/172	430/18410	1.19836e-07	6.01974e-06	4.51528e-06	ACVR1B/ATM/AURKA/BRD4/EIF2AK4/MAP3K5/MAPK1/MAPK14/MAPK3/MAPK8/MAPK9/OXSR1/PHKG2/PIK3CA/PRKAA1/RIPK1/SQSTM1/ULK2	18
MF	GO:0008198	ferrous iron binding	6/172	26/18410	1.20155e-07	6.01974e-06	4.51528e-06	CDO1/EGLN2/FTH1/FTL/ISCU/TF	6
MF	GO:0004707	MAP kinase activity	5/172	15/18410	1.86962e-07	8.51528e-06	6.38713e-06	MAPK1/MAPK14/MAPK3/MAPK8/MAPK9	5
MF	GO:0016175	superoxide-generating NAD(P)H oxidase activity	4/172	10/18410	1.47884e-06	6.17416e-05	4.63111e-05	CYBB/DUOX1/NCF2/NOX1	4
MF	GO:0008199	ferric iron binding	4/172	11/18410	2.30695e-06	8.25559e-05	6.19234e-05	FTH1/FTL/RRM2/TF	4
MF	GO:0055056	D-glucose transmembrane transporter activity	4/172	11/18410	2.30695e-06	8.25559e-05	6.19234e-05	SLC2A1/SLC2A3/SLC2A6/SLC2A8	4
MF	GO:0046982	protein heterodimerization activity	14/172	332/18410	2.97992e-06	9.95293e-05	7.46548e-05	ATF3/ATF4/AURKA/CAV1/CYBB/DDIT3/EPAS1/HIF1A/HSF1/JDP2/MAFG/TLR4/TP53/YWHAE	14
MF	GO:0004712	protein serine/threonine/tyrosine kinase activity	16/172	446/18410	4.63031e-06	0.000144986	0.000108751	ATM/AURKA/EIF2AK4/FLT3/MAP3K5/MAPK1/MAPK14/MAPK3/MAPK8/MAPK9/OXSR1/PIK3CA/PRKAA1/RIPK1/SRC/ULK2	16
MF	GO:0020037	heme binding	9/172	139/18410	6.37356e-06	0.000187833	0.000140889	BACH1/CBS/CYBB/DUOX1/HMOX1/NGB/NOS2/PTGS2/SRC	9
MF	GO:0106310	protein serine kinase activity	14/172	360/18410	7.54909e-06	0.000210116	0.000157604	ATM/AURKA/EIF2AK4/MAP3K5/MAPK1/MAPK14/MAPK3/MAPK8/MAPK9/OXSR1/PIK3CA/PRKAA1/RIPK1/ULK2	14
MF	GO:0050664	oxidoreductase activity, acting on NAD(P)H, oxygen as acceptor	4/172	15/18410	9.26732e-06	0.000234773	0.000176098	CYBB/DUOX1/NCF2/NOX1	4
MF	GO:0090482	vitamin transmembrane transporter activity	5/172	31/18410	9.37218e-06	0.000234773	0.000176098	ABCC1/SLC2A1/SLC2A3/SLC2A6/SLC2A8	5
MF	GO:0046906	tetrapyrrole binding	9/172	149/18410	1.11998e-05	0.000267196	0.000200418	BACH1/CBS/CYBB/DUOX1/HMOX1/NGB/NOS2/PTGS2/SRC	9
MF	GO:0030170	pyridoxal phosphate binding	6/172	55/18410	1.20913e-05	0.000275351	0.000206535	ALB/CBS/GOT1/GPT2/NFS1/PSAT1	6
MF	GO:0016684	oxidoreductase activity, acting on peroxide as acceptor	6/172	56/18410	1.34381e-05	0.000280521	0.000210413	DUOX1/GPX4/PRDX1/PRDX6/PTGS2/SESN2	6
MF	GO:0070279	vitamin B6 binding	6/172	56/18410	1.34381e-05	0.000280521	0.000210413	ALB/CBS/GOT1/GPT2/NFS1/PSAT1	6
MF	GO:0051213	dioxygenase activity	7/172	93/18410	2.65157e-05	0.000531374	0.000398573	ALOX12/ALOX15/ALOX15B/ALOXE3/CDO1/EGLN2/PTGS2	7
MF	GO:0001228	DNA-binding transcription activator activity, RNA polymerase II-specific	15/172	462/18410	2.98923e-05	0.000576002	0.000432047	ATF3/ATF4/BACH1/DDIT3/EPAS1/HIF1A/HNF4A/JUN/MAFG/MYB/NFE2L2/RELA/SP1/STAT3/TP53	15
MF	GO:0001216	DNA-binding transcription activator activity	15/172	466/18410	3.30035e-05	0.000612398	0.000459347	ATF3/ATF4/BACH1/DDIT3/EPAS1/HIF1A/HNF4A/JUN/MAFG/MYB/NFE2L2/RELA/SP1/STAT3/TP53	15
MF	GO:0005355	glucose transmembrane transporter activity	4/172	22/18410	4.71888e-05	0.000844343	0.000633323	SLC2A1/SLC2A3/SLC2A6/SLC2A8	4
MF	GO:0015149	hexose transmembrane transporter activity	4/172	23/18410	5.67082e-05	0.000979683	0.000734839	SLC2A1/SLC2A3/SLC2A6/SLC2A8	4
MF	GO:0015145	monosaccharide transmembrane transporter activity	4/172	25/18410	7.9839e-05	0.00133331	0.00100009	SLC2A1/SLC2A3/SLC2A6/SLC2A8	4
MF	GO:0051019	mitogen-activated protein kinase binding	4/172	26/18410	9.36701e-05	0.00151383	0.00113549	DUSP1/GCH1/MAPK14/SIRT1	4
MF	GO:0051119	sugar transmembrane transporter activity	4/172	27/18410	0.000109162	0.00170907	0.00128194	SLC2A1/SLC2A3/SLC2A6/SLC2A8	4
MF	GO:0004601	peroxidase activity	5/172	52/18410	0.000122361	0.00179129	0.00134361	DUOX1/GPX4/PRDX1/PRDX6/PTGS2	5
MF	GO:0140296	general transcription initiation factor binding	5/172	52/18410	0.000122361	0.00179129	0.00134361	ATF4/HSF1/JUN/RELA/TP53	5
MF	GO:0043522	leucine zipper domain binding	3/172	11/18410	0.00012514	0.00179129	0.00134361	ATF4/DDIT3/JDP2	3
MF	GO:0051219	phosphoprotein binding	6/172	88/18410	0.000175323	0.00243992	0.00183013	FBXW7/MAPK1/MAPK3/RB1/SRC/YWHAE	6
MF	GO:0042826	histone deacetylase binding	7/172	126/18410	0.000182654	0.00247323	0.00185512	HIC1/HIF1A/MAPK8/RELA/SP1/TP53/YWHAE	7
MF	GO:0008022	protein C-terminus binding	8/172	179/18410	0.000284103	0.00374568	0.00280955	ATF4/HRAS/NCF2/PRKAA1/SIRT1/SP1/SRC/TNFAIP3	8
MF	GO:0043621	protein self-association	5/172	63/18410	0.000304656	0.00391365	0.00293555	FLT3/HSF1/SLC2A1/TNFAIP3/TP53	5
MF	GO:0016836	hydro-lyase activity	5/172	64/18410	0.000328001	0.00410822	0.00308149	ACO1/ALOXE3/CA9/CBS/FH	5
MF	GO:0008514	organic anion transmembrane transporter activity	8/172	186/18410	0.000367689	0.00449298	0.00337009	ABCC1/SLC1A5/SLC2A1/SLC2A3/SLC2A6/SLC2A8/SLC38A1/SLC7A5	8
MF	GO:0002039	p53 binding	5/172	66/18410	0.000378731	0.00451772	0.00338865	BRD4/HIF1A/MUC1/SIRT1/TP53	5
MF	GO:0051536	iron-sulfur cluster binding	5/172	67/18410	0.000406214	0.00456861	0.00342681	ACO1/CISD1/CISD2/ISCU/NFS1	5
MF	GO:0051540	metal cluster binding	5/172	67/18410	0.000406214	0.00456861	0.00342681	ACO1/CISD1/CISD2/ISCU/NFS1	5
MF	GO:0030275	LRR domain binding	3/172	16/18410	0.000410354	0.00456861	0.00342681	ATF4/DDIT3/JDP2	3
MF	GO:0019825	oxygen binding	4/172	39/18410	0.000468853	0.00501327	0.00376035	ALB/CBS/EGLN2/NGB	4
MF	GO:0019902	phosphatase binding	8/172	193/18410	0.000470307	0.00501327	0.00376035	MAP3K5/MAPK1/MAPK14/MAPK3/MAPK8/STAT3/TP53/YWHAE	8
MF	GO:0019842	vitamin binding	7/172	148/18410	0.000487101	0.00508412	0.00381349	ALB/CBS/EGLN2/GOT1/GPT2/NFS1/PSAT1	7
MF	GO:0015144	carbohydrate transmembrane transporter activity	4/172	41/18410	0.000568947	0.0058172	0.00436336	SLC2A1/SLC2A3/SLC2A6/SLC2A8	4
MF	GO:0004708	MAP kinase kinase activity	3/172	18/18410	0.000589785	0.00590964	0.0044327	MAPK1/MAPK14/MAPK3	3
MF	GO:0016835	carbon-oxygen lyase activity	5/172	79/18410	0.000866418	0.00851128	0.00638413	ACO1/ALOXE3/CA9/CBS/FH	5
MF	GO:0031072	heat shock protein binding	6/172	123/18410	0.00105139	0.0101297	0.00759807	ARNTL/DNAJB6/HIF1A/HSF1/HSPA5/ZFP36	6
MF	GO:0008483	transaminase activity	3/172	23/18410	0.00123688	0.011692	0.00876991	GOT1/GPT2/PSAT1	3
MF	GO:0016769	transferase activity, transferring nitrogenous groups	3/172	24/18410	0.00140392	0.0125966	0.00944847	GOT1/GPT2/PSAT1	3
MF	GO:0051537	2 iron, 2 sulfur cluster binding	3/172	24/18410	0.00140392	0.0125966	0.00944847	CISD1/CISD2/ISCU	3
MF	GO:0016651	oxidoreductase activity, acting on NAD(P)H	5/172	88/18410	0.00140801	0.0125966	0.00944847	CYBB/DUOX1/NCF2/NOX1/NQO1	5
MF	GO:0050661	NADP binding	4/172	53/18410	0.00150817	0.013256	0.00994305	DUOX1/NOS2/NOX1/PGD	4
MF	GO:0045309	protein phosphorylated amino acid binding	4/172	55/18410	0.00173136	0.0149554	0.0112177	FBXW7/MAPK1/MAPK3/YWHAE	4
MF	GO:0016829	lyase activity	7/172	195/18410	0.00241561	0.0205122	0.0153858	ACO1/ALOXE3/CA9/CBS/FH/GOT1/PCK2	7
MF	GO:1990841	promoter-specific chromatin binding	4/172	62/18410	0.00269234	0.0221206	0.0165922	ATF4/HSF1/SIRT1/TP53	4
MF	GO:0019903	protein phosphatase binding	6/172	148/18410	0.00269333	0.0221206	0.0165922	MAP3K5/MAPK14/MAPK8/STAT3/TP53/YWHAE	6
MF	GO:0001221	transcription coregulator binding	5/172	108/18410	0.00345124	0.0278882	0.0209184	EPAS1/HIF1A/NFE2L2/RELA/SP1	5
MF	GO:0016303	1-phosphatidylinositol-3-kinase activity	2/172	10/18410	0.00371751	0.029563	0.0221746	ATM/PIK3CA	2
MF	GO:0004860	protein kinase inhibitor activity	4/172	70/18410	0.00417745	0.0324583	0.0243463	CDKN1A/HSPB1/SOCS1/TRIB3	4
MF	GO:0097718	disordered domain specific binding	3/172	35/18410	0.00421116	0.0324583	0.0243463	KEAP1/RB1/TP53	3
MF	GO:0004706	JUN kinase kinase kinase activity	2/172	11/18410	0.00451581	0.0327887	0.0245941	MAP3K5/RIPK1	2
MF	GO:0005536	glucose binding	2/172	11/18410	0.00451581	0.0327887	0.0245941	SLC2A3/SLC2A8	2
MF	GO:0047676	arachidonate-CoA ligase activity	2/172	11/18410	0.00451581	0.0327887	0.0245941	ACSL3/ACSL4	2
MF	GO:1990459	transferrin receptor binding	2/172	11/18410	0.00451581	0.0327887	0.0245941	SNX4/TF	2
MF	GO:0032182	ubiquitin-like protein binding	5/172	116/18410	0.00467916	0.0334894	0.0251197	FBXW7/HSPB1/PML/SQSTM1/TNFAIP3	5
MF	GO:0019210	kinase inhibitor activity	4/172	74/18410	0.00509373	0.0359431	0.0269601	CDKN1A/HSPB1/SOCS1/TRIB3	4
MF	GO:0008353	RNA polymerase II CTD heptapeptide repeat kinase activity	2/172	12/18410	0.00538583	0.036963	0.0277252	BRD4/MAPK1	2
MF	GO:0035004	phosphatidylinositol 3-kinase activity	2/172	12/18410	0.00538583	0.036963	0.0277252	ATM/PIK3CA	2
MF	GO:0031406	carboxylic acid binding	6/172	173/18410	0.00576804	0.0390512	0.0292915	ALB/EGLN2/GCLC/HNF4A/NOS2/SCP2	6
MF	GO:0001223	transcription coactivator binding	3/172	40/18410	0.00614421	0.0405033	0.0303807	EPAS1/HIF1A/RELA	3
MF	GO:0003925	G protein activity	3/172	40/18410	0.00614421	0.0405033	0.0303807	HRAS/KRAS/NRAS	3
MF	GO:0015175	neutral amino acid transmembrane transporter activity	3/172	41/18410	0.00658436	0.0422919	0.0317222	SLC1A5/SLC38A1/SLC7A5	3
MF	GO:0016877	ligase activity, forming carbon-sulfur bonds	3/172	41/18410	0.00658436	0.0422919	0.0317222	ACSL3/ACSL4/ATG7	3
MF	GO:0070700	BMP receptor binding	2/172	14/18410	0.00733546	0.0465113	0.0348871	GDF15/SRC	2
MF	GO:0044183	protein folding chaperone	3/172	43/18410	0.00751979	0.0465113	0.0348871	DNAJB6/HSPA5/HSPB1	3
MF	GO:0051879	Hsp90 protein binding	3/172	43/18410	0.00751979	0.0465113	0.0348871	ARNTL/HIF1A/HSF1	3
MF	GO:0032266	phosphatidylinositol-3-phosphate binding	3/172	44/18410	0.00801542	0.0489722	0.036733	SNX4/WIPI1/WIPI2	3
MF	GO:0004467	long-chain fatty acid-CoA ligase activity	2/172	15/18410	0.00841235	0.0507782	0.0380876	ACSL3/ACSL4	2
MF	GO:0002020	protease binding	5/172	136/18410	0.00905408	0.0540011	0.0405051	DPP4/PANX1/TNFAIP3/TP53/UBC	5
MF	GO:0035173	histone kinase activity	2/172	16/18410	0.00955549	0.0563212	0.0422453	AURKA/PRKAA1	2
MF	GO:0008509	anion transmembrane transporter activity	8/172	315/18410	0.0096704	0.0563357	0.0422562	ABCC1/SLC1A5/SLC2A1/SLC2A3/SLC2A6/SLC2A8/SLC38A1/SLC7A5	8
MF	GO:0016922	nuclear receptor binding	5/172	139/18410	0.00989233	0.0569662	0.0427291	FLT3/HIF1A/SIRT1/SRC/WIPI1	5
MF	GO:0043177	organic acid binding	5/172	141/18410	0.0104799	0.0580662	0.0435542	EGLN2/GCLC/NOS2/SCP2/SESN2	5
MF	GO:0001227	DNA-binding transcription repressor activity, RNA polymerase II-specific	8/172	321/18410	0.0107526	0.0580662	0.0435542	ATF3/BACH1/HIC1/HSF1/JDP2/JUN/RELA/TP53	8
MF	GO:0016722	oxidoreductase activity, acting on metal ions	2/172	17/18410	0.0107636	0.0580662	0.0435542	FTH1/STEAP3	2
MF	GO:0035497	cAMP response element binding	2/172	17/18410	0.0107636	0.0580662	0.0435542	JDP2/JUN	2
MF	GO:0050811	GABA receptor binding	2/172	17/18410	0.0107636	0.0580662	0.0435542	GABARAPL1/GABARAPL2	2
MF	GO:0005504	fatty acid binding	3/172	49/18410	0.0107788	0.0580662	0.0435542	ALB/HNF4A/SCP2	3
MF	GO:0001217	DNA-binding transcription repressor activity	8/172	325/18410	0.0115223	0.0614115	0.0460634	ATF3/BACH1/HIC1/HSF1/JDP2/JUN/RELA/TP53	8
MF	GO:0043130	ubiquitin binding	4/172	96/18410	0.0125626	0.0662512	0.0496936	FBXW7/HSPB1/SQSTM1/TNFAIP3	4

## Sheet: KEGG
Supplementary File 3. KEGG enrichment analysis results for 25 differentially expressed ferroptosis-related genes.
ID	Description	GeneRatio	BgRatio	pvalue	p.adjust	qvalue	geneID	Count
hsa04216	Ferroptosis	18/142	41/8206	9.2814e-22	2.37604e-19	9.67219e-20	ACSL3/ACSL4/ALOX15/ATG5/ATG7/CYBB/FTH1/FTL/GCLC/GPX4/HMOX1/MAP1LC3A/NCOA4/SAT1/SLC40A1/STEAP3/TF/TP53	18
hsa04140	Autophagy - animal	27/142	141/8206	2.86888e-21	3.67216e-19	1.49484e-19	ATG16L1/ATG3/ATG4D/ATG5/ATG7/BECN1/BNIP3/DDIT4/EIF2AK4/GABARAPL1/GABARAPL2/HIF1A/HRAS/KRAS/LAMP2/MAP1LC3A/MAPK1/MAPK3/MAPK8/MAPK9/NRAS/PIK3CA/PRKAA1/SQSTM1/ULK2/WIPI1/WIPI2	27
hsa04137	Mitophagy - animal	20/142	72/8206	2.15876e-19	1.84214e-17	7.49886e-18	ATF4/ATG5/BECN1/BNIP3/GABARAPL1/GABARAPL2/HIF1A/HRAS/JUN/KRAS/MAP1LC3A/MAPK8/MAPK9/NRAS/RELA/SP1/SQSTM1/SRC/TP53/UBC	20
hsa05167	Kaposi sarcoma-associated herpesvirus infection	25/142	194/8206	1.87262e-15	1.18478e-13	4.82289e-14	ATG3/BECN1/BID/CDKN1A/HIF1A/HRAS/IL6/JUN/KRAS/MAP1LC3A/MAPK1/MAPK14/MAPK3/MAPK8/MAPK9/NRAS/PIK3CA/PTGS2/RB1/RELA/SRC/STAT3/TP53/UBC/ZFP36	25
hsa05417	Lipid and atherosclerosis	26/142	215/8206	2.31401e-15	1.18478e-13	4.82289e-14	ATF4/BID/CYBB/DDIT3/HRAS/HSPA5/IL6/JUN/KRAS/MAP3K5/MAPK1/MAPK14/MAPK3/MAPK8/MAPK9/NCF2/NFE2L2/NOX1/NRAS/PIK3CA/RELA/SRC/STAT3/TLR4/TP53/VLDLR	26
hsa05418	Fluid shear stress and atherosclerosis	20/142	139/8206	1.86954e-13	7.9767e-12	3.24709e-12	CAV1/DUSP1/HMOX1/IFNG/JUN/KEAP1/MAP3K5/MAPK14/MAPK8/MAPK9/NCF2/NFE2L2/NOX1/NQO1/PIK3CA/PRKAA1/RELA/SQSTM1/SRC/TP53	20
hsa04068	FoxO signaling pathway	19/142	131/8206	6.78964e-13	2.48307e-11	1.01079e-11	ATM/BNIP3/CDKN1A/GABARAPL1/GABARAPL2/HRAS/IL6/KRAS/MAPK1/MAPK14/MAPK3/MAPK8/MAPK9/NRAS/PCK2/PIK3CA/PRKAA1/SIRT1/STAT3	19
hsa04136	Autophagy - other	11/142	32/8206	2.66779e-12	8.53694e-11	3.47515e-11	ATG16L1/ATG3/ATG4D/ATG5/ATG7/BECN1/GABARAPL1/GABARAPL2/ULK2/WIPI1/WIPI2	11
hsa05161	Hepatitis B	20/142	162/8206	3.54675e-12	1.00885e-10	4.10676e-11	ATF4/BID/CDKN1A/HRAS/IL6/JUN/KRAS/MAPK1/MAPK14/MAPK3/MAPK8/MAPK9/NRAS/PIK3CA/RB1/RELA/SRC/STAT3/TLR4/TP53	20
hsa05131	Shigellosis	23/142	247/8206	2.84464e-11	7.28227e-10	2.96441e-10	ATG16L1/ATG5/ATM/BECN1/BNIP3/CD44/JUN/MAP1LC3A/MAPK1/MAPK14/MAPK3/MAPK8/MAPK9/PIK3CA/RELA/RIPK1/SQSTM1/SRC/TLR4/TP53/UBC/WIPI1/WIPI2	23
hsa04621	NOD-like receptor signaling pathway	20/142	184/8206	3.83294e-11	8.90549e-10	3.62518e-10	ATG16L1/ATG5/CYBB/GABARAPL1/GABARAPL2/IL6/JUN/MAP1LC3A/MAPK1/MAPK14/MAPK3/MAPK8/MAPK9/PANX1/RELA/RIPK1/TLR4/TNFAIP3/TXNIP/YWHAE	20
hsa04066	HIF-1 signaling pathway	16/142	109/8206	4.17445e-11	8.90549e-10	3.62518e-10	CDKN1A/CYBB/EGLN2/HIF1A/HMOX1/IFNG/IL6/MAPK1/MAPK3/NOS2/PIK3CA/RELA/SLC2A1/STAT3/TF/TLR4	16
hsa01522	Endocrine resistance	15/142	98/8206	9.50674e-11	1.8721e-09	7.62079e-10	CDKN1A/HRAS/JUN/KRAS/MAPK1/MAPK14/MAPK3/MAPK8/MAPK9/NRAS/PIK3CA/RB1/SP1/SRC/TP53	15
hsa05211	Renal cell carcinoma	13/142	69/8206	1.21031e-10	2.08296e-09	8.47914e-10	CDKN1A/EGLN2/EPAS1/FH/HIF1A/HRAS/JUN/KRAS/MAPK1/MAPK3/NRAS/PIK3CA/SLC2A1	13
hsa04933	AGE-RAGE signaling pathway in diabetic complications	15/142	100/8206	1.27995e-10	2.08296e-09	8.47914e-10	CYBB/HRAS/IL6/JUN/KRAS/MAPK1/MAPK14/MAPK3/MAPK8/MAPK9/NOX1/NRAS/PIK3CA/RELA/STAT3	15
hsa04210	Apoptosis	17/142	136/8206	1.36587e-10	2.08296e-09	8.47914e-10	ATF4/ATM/BID/DDIT3/HRAS/JUN/KRAS/MAP3K5/MAPK1/MAPK3/MAPK8/MAPK9/NRAS/PIK3CA/RELA/RIPK1/TP53	17
hsa04917	Prolactin signaling pathway	13/142	70/8206	1.46458e-10	2.08296e-09	8.47914e-10	HRAS/KRAS/MAPK1/MAPK14/MAPK3/MAPK8/MAPK9/NRAS/PIK3CA/RELA/SOCS1/SRC/STAT3	13
hsa05230	Central carbon metabolism in cancer	13/142	70/8206	1.46458e-10	2.08296e-09	8.47914e-10	FLT3/GLS2/HIF1A/HRAS/KRAS/MAPK1/MAPK3/NRAS/PIK3CA/SLC1A5/SLC2A1/SLC7A5/TP53	13
hsa05208	Chemical carcinogenesis - reactive oxygen species	20/142	223/8206	1.23441e-09	1.6632e-08	6.77043e-09	HIF1A/HMOX1/HRAS/JUN/KEAP1/KRAS/MAP3K5/MAPK1/MAPK14/MAPK3/MAPK8/MAPK9/NCF2/NFE2L2/NOX1/NQO1/NRAS/PIK3CA/RELA/SRC	20
hsa04722	Neurotrophin signaling pathway	15/142	119/8206	1.58123e-09	2.02397e-08	8.23902e-09	ATF4/HRAS/JUN/KRAS/MAP3K5/MAPK1/MAPK14/MAPK3/MAPK8/MAPK9/NRAS/PIK3CA/RELA/TP53/YWHAE	15
hsa04625	C-type lectin receptor signaling pathway	14/142	104/8206	2.37977e-09	2.90105e-08	1.18094e-08	HRAS/IL6/JUN/KRAS/MAPK1/MAPK14/MAPK3/MAPK8/MAPK9/NRAS/PIK3CA/PTGS2/RELA/SRC	14
hsa05235	PD-L1 expression and PD-1 checkpoint pathway in cancer	13/142	89/8206	3.27736e-09	3.81366e-08	1.55244e-08	HIF1A/HRAS/IFNG/JUN/KRAS/MAPK1/MAPK14/MAPK3/NRAS/PIK3CA/RELA/STAT3/TLR4	13
hsa04668	TNF signaling pathway	14/142	112/8206	6.39032e-09	7.11271e-08	2.89539e-08	ATF4/IL6/JUN/MAP3K5/MAPK1/MAPK14/MAPK3/MAPK8/MAPK9/PIK3CA/PTGS2/RELA/RIPK1/TNFAIP3	14
hsa05163	Human cytomegalovirus infection	19/142	225/8206	9.06454e-09	9.66884e-08	3.93592e-08	ATF4/BID/CDKN1A/HRAS/IL6/KRAS/MAPK1/MAPK14/MAPK3/NRAS/PIK3CA/PTGS2/RB1/RELA/RIPK1/SP1/SRC/STAT3/TP53	19
hsa05160	Hepatitis C	16/142	157/8206	1.02123e-08	1.04574e-07	4.25692e-08	BID/CDKN1A/EIF2AK4/HRAS/IFNG/KRAS/MAPK1/MAPK3/NRAS/PIK3CA/RB1/RELA/RIPK1/STAT3/TP53/YWHAE	16
hsa04071	Sphingolipid signaling pathway	14/142	119/8206	1.41844e-08	1.39662e-07	5.68525e-08	ABCC1/BID/HRAS/KRAS/MAP3K5/MAPK1/MAPK14/MAPK3/MAPK8/MAPK9/NRAS/PIK3CA/RELA/TP53	14
hsa05219	Bladder cancer	9/142	41/8206	2.36125e-08	2.23882e-07	9.1136e-08	CDKN1A/HRAS/KRAS/MAPK1/MAPK3/NRAS/RB1/SRC/TP53	9
hsa04926	Relaxin signaling pathway	14/142	129/8206	4.03744e-08	3.69137e-07	1.50265e-07	ATF4/HRAS/JUN/KRAS/MAPK1/MAPK14/MAPK3/MAPK8/MAPK9/NOS2/NRAS/PIK3CA/RELA/SRC	14
hsa05166	Human T-cell leukemia virus 1 infection	18/142	222/8206	4.33877e-08	3.83008e-07	1.55912e-07	ATF4/ATM/CDKN1A/HRAS/IL6/JUN/KRAS/MAPK1/MAPK3/MAPK8/MAPK9/NRAS/PIK3CA/RB1/RELA/SLC2A1/TP53/ZFP36	18
hsa04370	VEGF signaling pathway	10/142	59/8206	5.34018e-08	4.55695e-07	1.85501e-07	HRAS/HSPB1/KRAS/MAPK1/MAPK14/MAPK3/NRAS/PIK3CA/PTGS2/SRC	10
hsa05212	Pancreatic cancer	11/142	76/8206	6.18452e-08	5.10721e-07	2.07901e-07	CDKN1A/KRAS/MAPK1/MAPK3/MAPK8/MAPK9/PIK3CA/RB1/RELA/STAT3/TP53	11
hsa04657	IL-17 signaling pathway	12/142	94/8206	6.4128e-08	5.13024e-07	2.08838e-07	ELAVL1/IFNG/IL6/JUN/MAPK1/MAPK14/MAPK3/MAPK8/MAPK9/PTGS2/RELA/TNFAIP3	12
hsa04218	Cellular senescence	15/142	156/8206	6.66645e-08	5.17155e-07	2.1052e-07	ATM/CDKN1A/HRAS/IL6/KRAS/MAPK1/MAPK14/MAPK3/NRAS/PIK3CA/RB1/RELA/SIRT1/SQSTM1/TP53	15
hsa05140	Leishmaniasis	11/142	77/8206	7.10954e-08	5.35307e-07	2.17909e-07	CYBB/IFNG/JUN/MAPK1/MAPK14/MAPK3/NCF2/NOS2/PTGS2/RELA/TLR4	11
hsa04217	Necroptosis	15/142	159/8206	8.60303e-08	6.2925e-07	2.5615e-07	ALOX15/BID/CHMP5/CHMP6/CYBB/FTH1/FTL/IFNG/MAPK8/MAPK9/RIPK1/SQSTM1/STAT3/TLR4/TNFAIP3	15
hsa05022	Pathways of neurodegeneration - multiple diseases	26/142	476/8206	1.2991e-07	9.23805e-07	3.76055e-07	ATF4/BECN1/BID/CYBB/DDIT3/HRAS/HSPA5/IL6/KRAS/MAP1LC3A/MAP3K5/MAPK1/MAPK14/MAPK3/MAPK8/MAPK9/NOS2/NOX1/NRAS/PTGS2/RELA/SQSTM1/UBC/ULK2/WIPI1/WIPI2	26
hsa05142	Chagas disease	12/142	102/8206	1.61198e-07	1.11532e-06	4.54015e-07	IFNG/IL6/JUN/MAPK1/MAPK14/MAPK3/MAPK8/MAPK9/NOS2/PIK3CA/RELA/TLR4	12
hsa05216	Thyroid cancer	8/142	37/8206	1.66765e-07	1.12347e-06	4.57333e-07	CDKN1A/HRAS/KRAS/MAPK1/MAPK3/NCOA4/NRAS/TP53	8
hsa05221	Acute myeloid leukemia	10/142	67/8206	1.8735e-07	1.22978e-06	5.0061e-07	FLT3/HRAS/KRAS/MAPK1/MAPK3/NRAS/PIK3CA/PML/RELA/STAT3	10
hsa04660	T cell receptor signaling pathway	12/142	104/8206	2.00248e-07	1.25957e-06	5.12736e-07	HRAS/IFNG/JUN/KRAS/MAPK1/MAPK14/MAPK3/MAPK8/MAPK9/NRAS/PIK3CA/RELA	12
hsa04012	ErbB signaling pathway	11/142	85/8206	2.01728e-07	1.25957e-06	5.12736e-07	CDKN1A/HRAS/JUN/KRAS/MAPK1/MAPK3/MAPK8/MAPK9/NRAS/PIK3CA/SRC	11
hsa05210	Colorectal cancer	11/142	86/8206	2.27925e-07	1.38926e-06	5.65529e-07	CDKN1A/HRAS/JUN/KRAS/MAPK1/MAPK3/MAPK8/MAPK9/NRAS/PIK3CA/TP53	11
hsa04380	Osteoclast differentiation	13/142	128/8206	2.774e-07	1.6515e-06	6.72279e-07	IFNG/JUN/MAPK1/MAPK14/MAPK3/MAPK8/MAPK9/NCF2/NOX1/PIK3CA/RELA/SOCS1/SQSTM1	13
hsa04211	Longevity regulating pathway	11/142	89/8206	3.25503e-07	1.89384e-06	7.70928e-07	ATF4/ATG5/HRAS/KRAS/NRAS/PIK3CA/PRKAA1/RELA/SESN2/SIRT1/TP53	11
hsa05223	Non-small cell lung cancer	10/142	72/8206	3.76322e-07	2.14085e-06	8.71483e-07	CDKN1A/HRAS/KRAS/MAPK1/MAPK3/NRAS/PIK3CA/RB1/STAT3/TP53	10
hsa04912	GnRH signaling pathway	11/142	93/8206	5.12217e-07	2.8506e-06	1.1604e-06	ATF4/HRAS/JUN/KRAS/MAPK1/MAPK14/MAPK3/MAPK8/MAPK9/NRAS/SRC	11
hsa05010	Alzheimer disease	22/142	384/8206	6.15576e-07	3.29966e-06	1.3432e-06	ATF4/BECN1/BID/CYBB/DDIT3/HRAS/IL6/KRAS/MAP3K5/MAPK1/MAPK3/MAPK8/MAPK9/NOS2/NOX1/NRAS/PIK3CA/PTGS2/RELA/ULK2/WIPI1/WIPI2	22
hsa05133	Pertussis	10/142	76/8206	6.31576e-07	3.29966e-06	1.3432e-06	IL6/JUN/MAPK1/MAPK14/MAPK3/MAPK8/MAPK9/NOS2/RELA/TLR4	10
hsa05220	Chronic myeloid leukemia	10/142	76/8206	6.31576e-07	3.29966e-06	1.3432e-06	CDKN1A/HRAS/KRAS/MAPK1/MAPK3/NRAS/PIK3CA/RB1/RELA/TP53	10
hsa05215	Prostate cancer	11/142	97/8206	7.87834e-07	4.03371e-06	1.64201e-06	ATF4/CDKN1A/HRAS/KRAS/MAPK1/MAPK3/NRAS/PIK3CA/RB1/RELA/TP53	11
hsa05231	Choline metabolism in cancer	11/142	98/8206	8.74444e-07	4.38937e-06	1.78679e-06	HIF1A/HRAS/JUN/KRAS/MAPK1/MAPK3/MAPK8/MAPK9/NRAS/PIK3CA/SP1	11
hsa04935	Growth hormone synthesis, secretion and action	12/142	120/8206	9.6421e-07	4.74688e-06	1.93232e-06	ATF4/HRAS/KRAS/MAPK1/MAPK14/MAPK3/MAPK8/MAPK9/NRAS/PIK3CA/SOCS1/STAT3	12
hsa05225	Hepatocellular carcinoma	14/142	168/8206	1.09116e-06	5.27053e-06	2.14549e-06	CDKN1A/HMOX1/HRAS/KEAP1/KRAS/MAPK1/MAPK3/NFE2L2/NQO1/NRAS/PIK3CA/RB1/TP53/TXNRD1	14
hsa04620	Toll-like receptor signaling pathway	11/142	104/8206	1.59323e-06	7.55308e-06	3.07465e-06	IL6/JUN/MAPK1/MAPK14/MAPK3/MAPK8/MAPK9/PIK3CA/RELA/RIPK1/TLR4	11
hsa05169	Epstein-Barr virus infection	15/142	202/8206	1.91851e-06	8.92978e-06	3.63507e-06	BID/CD44/CDKN1A/IL6/JUN/MAPK14/MAPK8/MAPK9/PIK3CA/RB1/RELA/RIPK1/STAT3/TNFAIP3/TP53	15
hsa05203	Viral carcinogenesis	15/142	204/8206	2.17091e-06	9.92417e-06	4.03985e-06	ATF4/CDKN1A/HRAS/JUN/KRAS/MAPK1/MAPK3/NRAS/PIK3CA/RB1/RELA/SRC/STAT3/TP53/YWHAE	15
hsa04664	Fc epsilon RI signaling pathway	9/142	68/8206	2.23461e-06	1.00361e-05	4.08544e-06	HRAS/KRAS/MAPK1/MAPK14/MAPK3/MAPK8/MAPK9/NRAS/PIK3CA	9
hsa05205	Proteoglycans in cancer	15/142	205/8206	2.30796e-06	1.00795e-05	4.10309e-06	CAV1/CD44/CDKN1A/HIF1A/HRAS/KRAS/MAPK1/MAPK14/MAPK3/NRAS/PIK3CA/SRC/STAT3/TLR4/TP53	15
hsa04659	Th17 cell differentiation	11/142	108/8206	2.32301e-06	1.00795e-05	4.10309e-06	HIF1A/IFNG/IL6/JUN/MAPK1/MAPK14/MAPK3/MAPK8/MAPK9/RELA/STAT3	11
hsa04920	Adipocytokine signaling pathway	9/142	69/8206	2.53239e-06	1.08049e-05	4.39836e-06	ACSL3/ACSL4/MAPK8/MAPK9/PCK2/PRKAA1/RELA/SLC2A1/STAT3	9
hsa04150	mTOR signaling pathway	13/142	156/8206	2.69649e-06	1.13164e-05	4.60661e-06	ATP6V1G2/DDIT4/HRAS/KRAS/LPIN1/MAPK1/MAPK3/NRAS/PIK3CA/PRKAA1/SESN2/SLC7A5/ULK2	13
hsa05145	Toxoplasmosis	11/142	112/8206	3.33117e-06	1.37545e-05	5.59909e-06	IFNG/MAPK1/MAPK14/MAPK3/MAPK8/MAPK9/NOS2/RELA/SOCS1/STAT3/TLR4	11
hsa05170	Human immunodeficiency virus 1 infection	15/142	212/8206	3.50556e-06	1.42448e-05	5.79866e-06	ATM/BID/HRAS/JUN/KRAS/MAPK1/MAPK14/MAPK3/MAPK8/MAPK9/NRAS/PIK3CA/RELA/RIPK1/TLR4	15
hsa05218	Melanoma	9/142	72/8206	3.63958e-06	1.45583e-05	5.9263e-06	CDKN1A/HRAS/KRAS/MAPK1/MAPK3/NRAS/PIK3CA/RB1/TP53	9
hsa04910	Insulin signaling pathway	12/142	137/8206	3.95466e-06	1.55753e-05	6.34026e-06	HRAS/KRAS/MAPK1/MAPK3/MAPK8/MAPK9/NRAS/PCK2/PHKG2/PIK3CA/PRKAA1/SOCS1	12
hsa05162	Measles	12/142	139/8206	4.60252e-06	1.78522e-05	7.26714e-06	BID/EIF2AK4/IL6/JUN/MAPK8/MAPK9/PIK3CA/RELA/STAT3/TLR4/TNFAIP3/TP53	12
hsa05214	Glioma	9/142	75/8206	5.13959e-06	1.96379e-05	7.99403e-06	CDKN1A/HRAS/KRAS/MAPK1/MAPK3/NRAS/PIK3CA/RB1/TP53	9
hsa04936	Alcoholic liver disease	12/142	142/8206	5.74963e-06	2.16457e-05	8.81136e-06	IL6/LPIN1/MAP3K5/MAPK14/MAPK8/MAPK9/PRKAA1/RELA/RIPK1/SCD/SIRT1/TLR4	12
hsa05206	MicroRNAs in cancer	18/142	310/8206	5.95721e-06	2.21021e-05	8.99716e-06	ABCC1/ATM/CD44/CDKN1A/DDIT4/GLS2/HMOX1/HRAS/KRAS/MAPK1/MAPK3/NRAS/PIK3CA/PTGS2/SIRT1/SOCS1/STAT3/TP53	18
hsa05213	Endometrial cancer	8/142	58/8206	6.09493e-06	2.229e-05	9.07365e-06	CDKN1A/HRAS/KRAS/MAPK1/MAPK3/NRAS/PIK3CA/TP53	8
hsa01521	EGFR tyrosine kinase inhibitor resistance	9/142	79/8206	7.94258e-06	2.8638e-05	1.16577e-05	HRAS/IL6/KRAS/MAPK1/MAPK3/NRAS/PIK3CA/SRC/STAT3	9
hsa04010	MAPK signaling pathway	17/142	294/8206	1.16607e-05	4.14601e-05	1.68773e-05	ATF4/DDIT3/DUSP1/FLT3/HRAS/HSPB1/JUN/KRAS/MAP3K5/MAPK1/MAPK14/MAPK3/MAPK8/MAPK9/NRAS/RELA/TP53	17
hsa05152	Tuberculosis	13/142	180/8206	1.30352e-05	4.57126e-05	1.86083e-05	BID/IFNG/IL6/LAMP2/MAPK1/MAPK14/MAPK3/MAPK8/MAPK9/NOS2/RELA/SRC/TLR4	13
hsa04932	Non-alcoholic fatty liver disease	12/142	155/8206	1.41454e-05	4.89353e-05	1.99202e-05	ATF4/BID/DDIT3/IL6/JUN/MAP3K5/MAPK14/MAPK8/MAPK9/PIK3CA/PRKAA1/RELA	12
hsa04931	Insulin resistance	10/142	108/8206	1.59977e-05	5.46055e-05	2.22284e-05	IL6/MAPK8/MAPK9/PCK2/PIK3CA/PRKAA1/RELA/SLC2A1/STAT3/TRIB3	10
hsa05135	Yersinia infection	11/142	137/8206	2.3241e-05	7.82856e-05	3.18679e-05	IL6/JUN/MAPK1/MAPK14/MAPK3/MAPK8/MAPK9/PIK3CA/RELA/SRC/TLR4	11
hsa04726	Serotonergic synapse	10/142	115/8206	2.77828e-05	9.23688e-05	3.76008e-05	ALOX12/ALOX15/ALOX15B/DUSP1/HRAS/KRAS/MAPK1/MAPK3/NRAS/PTGS2	10
hsa01524	Platinum drug resistance	8/142	73/8206	3.43566e-05	0.00011276	4.59015e-05	ATM/BID/CDKN1A/MAP3K5/MAPK1/MAPK3/PIK3CA/TP53	8
hsa04151	PI3K-Akt signaling pathway	18/142	354/8206	3.61833e-05	0.000117252	4.77301e-05	ATF4/CDKN1A/DDIT4/FLT3/HRAS/IL6/KRAS/MAPK1/MAPK3/MYB/NRAS/PCK2/PIK3CA/PRKAA1/RELA/TLR4/TP53/YWHAE	18
hsa04919	Thyroid hormone signaling pathway	10/142	121/8206	4.3177e-05	0.000138166	5.62437e-05	HIF1A/HRAS/KRAS/MAPK1/MAPK3/NRAS/PIK3CA/SLC2A1/SRC/TP53	10
hsa05224	Breast cancer	11/142	147/8206	4.47992e-05	0.000141588	5.76364e-05	CDKN1A/HRAS/JUN/KRAS/MAPK1/MAPK3/NRAS/PIK3CA/RB1/SP1/TP53	11
hsa04662	B cell receptor signaling pathway	8/142	82/8206	7.99215e-05	0.000249511	0.000101569	HRAS/JUN/KRAS/MAPK1/MAPK3/NRAS/PIK3CA/RELA	8
hsa04213	Longevity regulating pathway - multiple species	7/142	62/8206	8.90052e-05	0.000274522	0.00011175	ATG5/HRAS/KRAS/NRAS/PIK3CA/PRKAA1/SIRT1	7
hsa04930	Type II diabetes mellitus	6/142	46/8206	0.000127975	0.000390019	0.000158766	MAPK1/MAPK3/MAPK8/MAPK9/PIK3CA/SOCS1	6
hsa04915	Estrogen signaling pathway	10/142	138/8206	0.000131417	0.000395797	0.000161118	ATF4/HRAS/JUN/KRAS/MAPK1/MAPK3/NRAS/PIK3CA/SP1/SRC	10
hsa05017	Spinocerebellar ataxia	10/142	143/8206	0.000176411	0.000525131	0.000213766	BECN1/MAP3K5/MAPK8/MAPK9/PIK3CA/SP1/ULK2/VLDLR/WIPI1/WIPI2	10
hsa04658	Th1 and Th2 cell differentiation	8/142	92/8206	0.000180506	0.000526982	0.00021452	IFNG/JUN/MAPK1/MAPK14/MAPK3/MAPK8/MAPK9/RELA	8
hsa05171	Coronavirus disease - COVID-19	13/142	232/8206	0.00018115	0.000526982	0.00021452	CYBB/IL6/JUN/MAPK1/MAPK14/MAPK3/MAPK8/MAPK9/PIK3CA/RELA/RPL8/STAT3/TLR4	13
hsa05120	Epithelial cell signaling in Helicobacter pylori infection	7/142	70/8206	0.000193365	0.000556197	0.000226413	ATP6V1G2/JUN/MAPK14/MAPK8/MAPK9/RELA/SRC	7
hsa04115	p53 signaling pathway	7/142	73/8206	0.000251725	0.000716019	0.000291472	ATM/BID/CDKN1A/RRM2/SESN2/STEAP3/TP53	7
hsa01210	2-Oxocarboxylic acid metabolism	4/142	19/8206	0.000272171	0.000765667	0.000311682	ACO1/CS/GOT1/GPT2	4
hsa05207	Chemical carcinogenesis - receptor activation	12/142	212/8206	0.000294506	0.000819496	0.000333594	ATF4/HRAS/JUN/KRAS/MAPK1/MAPK3/NRAS/PIK3CA/RB1/RELA/SRC/STAT3	12
hsa01230	Biosynthesis of amino acids	7/142	75/8206	0.000297959	0.000820188	0.000333876	ACO1/ASNS/CBS/CS/GOT1/GPT2/PSAT1	7
hsa04921	Oxytocin signaling pathway	10/142	154/8206	0.000322454	0.000878172	0.00035748	CDKN1A/HRAS/JUN/KRAS/MAPK1/MAPK3/NRAS/PRKAA1/PTGS2/SRC	10
hsa04914	Progesterone-mediated oocyte maturation	8/142	102/8206	0.000367842	0.000980911	0.000399302	AURKA/KRAS/MAPK1/MAPK14/MAPK3/MAPK8/MAPK9/PIK3CA	8
hsa05146	Amoebiasis	8/142	102/8206	0.000367842	0.000980911	0.000399302	HSPB1/IFNG/IL6/NOS2/PIK3CA/PRDX1/RELA/TLR4	8
hsa00220	Arginine biosynthesis	4/142	22/8206	0.000493347	0.00130203	0.00053002	GLS2/GOT1/GPT2/NOS2	4
hsa04978	Mineral absorption	6/142	60/8206	0.0005609	0.00146521	0.000596446	FTH1/FTL/HMOX1/MT1G/SLC40A1/TF	6
hsa05130	Pathogenic Escherichia coli infection	11/142	197/8206	0.000593138	0.00153377	0.000624356	IL6/JUN/MAPK1/MAPK14/MAPK3/MAPK8/MAPK9/RELA/RIPK1/SRC/TLR4	11
hsa00590	Arachidonic acid metabolism	6/142	61/8206	0.000613351	0.00157018	0.000639176	ALOX12/ALOX15/ALOX15B/ALOXE3/GPX4/PTGS2	6
hsa04371	Apelin signaling pathway	9/142	139/8206	0.000657738	0.00166714	0.000678646	BECN1/HRAS/KRAS/MAP1LC3A/MAPK1/MAPK3/NOS2/NRAS/PRKAA1	9
hsa04929	GnRH secretion	6/142	64/8206	0.000793796	0.00199227	0.000810999	HRAS/KRAS/MAPK1/MAPK3/NRAS/PIK3CA	6
hsa04550	Signaling pathways regulating pluripotency of stem cells	9/142	143/8206	0.00080705	0.00200587	0.000816535	ACVR1B/HRAS/KRAS/MAPK1/MAPK14/MAPK3/NRAS/PIK3CA/STAT3	9
hsa05321	Inflammatory bowel disease	6/142	65/8206	0.000862249	0.0021057	0.000857172	IFNG/IL6/JUN/RELA/STAT3/TLR4	6
hsa05020	Prion disease	13/142	273/8206	0.000863665	0.0021057	0.000857172	ATF4/CAV1/CYBB/DDIT3/HSPA5/IL6/MAPK1/MAPK14/MAPK3/MAPK8/MAPK9/NCF2/PIK3CA	13
hsa04720	Long-term potentiation	6/142	67/8206	0.00101275	0.00244588	0.000995649	ATF4/HRAS/KRAS/MAPK1/MAPK3/NRAS	6
hsa05222	Small cell lung cancer	7/142	92/8206	0.00103055	0.00246562	0.00100369	CDKN1A/NOS2/PIK3CA/PTGS2/RB1/RELA/TP53	7
hsa05226	Gastric cancer	9/142	149/8206	0.00108186	0.0025644	0.0010439	CDKN1A/HRAS/KRAS/MAPK1/MAPK3/NRAS/PIK3CA/RB1/TP53	9
hsa05132	Salmonella infection	12/142	249/8206	0.00123384	0.00289782	0.00117962	HRAS/IL6/JUN/MAPK1/MAPK14/MAPK3/MAPK8/MAPK9/PIK3CA/RELA/RIPK1/TLR4	12
hsa04622	RIG-I-like receptor signaling pathway	6/142	70/8206	0.00127541	0.00296824	0.00120829	ATG5/MAPK14/MAPK8/MAPK9/RELA/RIPK1	6
hsa04613	Neutrophil extracellular trap formation	10/142	190/8206	0.00164714	0.00376135	0.00153114	ATG7/CYBB/MAPK1/MAPK14/MAPK3/NCF2/PIK3CA/RELA/SRC/TLR4	10
hsa00020	Citrate cycle (TCA cycle)	4/142	30/8206	0.00166028	0.00376135	0.00153114	ACO1/CS/FH/PCK2	4
hsa01523	Antifolate resistance	4/142	30/8206	0.00166028	0.00376135	0.00153114	ABCC1/ALOX12/IL6/RELA	4
hsa00270	Cysteine and methionine metabolism	5/142	51/8206	0.00179167	0.00402341	0.00163782	CBS/CDO1/GCLC/GOT1/PSAT1	5
hsa03320	PPAR signaling pathway	6/142	75/8206	0.00182535	0.00406338	0.00165409	ACSL3/ACSL4/PCK2/SCD/SCP2/UBC	6
hsa04650	Natural killer cell mediated cytotoxicity	8/142	131/8206	0.00190733	0.00420928	0.00171348	BID/HRAS/IFNG/KRAS/MAPK1/MAPK3/NRAS/PIK3CA	8
hsa04215	Apoptosis - multiple species	4/142	32/8206	0.00212107	0.00464098	0.00188922	BECN1/BID/MAPK8/MAPK9	4
hsa05164	Influenza A	9/142	171/8206	0.00280207	0.00607906	0.00247462	BID/IFNG/IL6/MAPK1/MAPK3/PIK3CA/PML/RELA/TLR4	9
hsa00480	Glutathione metabolism	5/142	57/8206	0.00293996	0.00627192	0.00255312	GCLC/GPX4/PGD/PRDX6/RRM2	5
hsa05134	Legionellosis	5/142	57/8206	0.00293996	0.00627192	0.00255312	BNIP3/HSF1/IL6/RELA/TLR4	5
hsa04725	Cholinergic synapse	7/142	113/8206	0.00336533	0.00712004	0.00289837	ATF4/HRAS/KRAS/MAPK1/MAPK3/NRAS/PIK3CA	7
hsa00250	Alanine, aspartate and glutamate metabolism	4/142	37/8206	0.0036441	0.00758446	0.00308743	ASNS/GLS2/GOT1/GPT2	4
hsa04960	Aldosterone-regulated sodium reabsorption	4/142	37/8206	0.0036441	0.00758446	0.00308743	KRAS/MAPK1/MAPK3/PIK3CA	4
hsa04730	Long-term depression	5/142	60/8206	0.00367962	0.00759663	0.00309238	HRAS/KRAS/MAPK1/MAPK3/NRAS	5
hsa01200	Carbon metabolism	7/142	115/8206	0.00371057	0.00759924	0.00309344	ACO1/CS/FH/GOT1/GPT2/PGD/PSAT1	7
hsa04540	Gap junction	6/142	88/8206	0.00409163	0.0082491	0.00335798	HRAS/KRAS/MAPK1/MAPK3/NRAS/SRC	6
hsa05014	Amyotrophic lateral sclerosis	14/142	364/8206	0.00409233	0.0082491	0.00335798	ATF4/BECN1/BID/DDIT3/HSPA5/MAP1LC3A/MAP3K5/MAPK14/NOS2/SQSTM1/TP53/ULK2/WIPI1/WIPI2	14
hsa05165	Human papillomavirus infection	13/142	331/8206	0.00472664	0.00945328	0.00384817	ATM/ATP6V1G2/CDKN1A/HRAS/KRAS/MAPK1/MAPK3/NRAS/PIK3CA/PTGS2/RB1/RELA/TP53	13
hsa04152	AMPK signaling pathway	7/142	121/8206	0.00490933	0.00974254	0.00396592	ELAVL1/HNF4A/PCK2/PIK3CA/PRKAA1/SCD/SIRT1	7
hsa04062	Chemokine signaling pathway	9/142	192/8206	0.00600121	0.0118178	0.00481069	HRAS/KRAS/MAPK1/MAPK3/NRAS/PIK3CA/RELA/SRC/STAT3	9
hsa05202	Transcriptional misregulation in cancer	9/142	193/8206	0.00620422	0.0121243	0.00493546	ATM/CDKN1A/DDIT3/FLT3/IL6/PML/RELA/SP1/TP53	9
hsa05012	Parkinson disease	11/142	266/8206	0.0063141	0.0122455	0.00498482	ATF4/DDIT3/DUSP1/HSPA5/KEAP1/MAP3K5/MAPK8/MAPK9/NFE2L2/TP53/UBC	11
hsa04750	Inflammatory mediator regulation of TRP channels	6/142	98/8206	0.00690767	0.013296	0.00541242	ALOX12/MAPK14/MAPK8/MAPK9/PIK3CA/SRC	6
hsa04014	Ras signaling pathway	10/142	236/8206	0.00771579	0.0147406	0.0060005	FLT3/HRAS/KRAS/MAPK1/MAPK3/MAPK8/MAPK9/NRAS/PIK3CA/RELA	10
hsa04510	Focal adhesion	9/142	201/8206	0.00802524	0.0152182	0.00619492	CAV1/HRAS/JUN/MAPK1/MAPK3/MAPK8/MAPK9/PIK3CA/SRC	9
hsa05415	Diabetic cardiomyopathy	9/142	203/8206	0.00853848	0.0160724	0.00654265	CYBB/MAPK14/MAPK8/MAPK9/NCF2/PIK3CA/RELA/SLC2A1/SP1	9
hsa04064	NF-kappa B signaling pathway	6/142	104/8206	0.00915605	0.0171091	0.00696465	ATM/PTGS2/RELA/RIPK1/TLR4/TNFAIP3	6
hsa04141	Protein processing in endoplasmic reticulum	8/142	171/8206	0.0095224	0.0176647	0.00719083	ATF4/DDIT3/EIF2AK4/HSPA5/MAP3K5/MAPK8/MAPK9/NFE2L2	8
hsa04922	Glucagon signaling pathway	6/142	107/8206	0.0104576	0.01926	0.00784023	ATF4/PCK2/PHKG2/PRKAA1/SIRT1/SLC2A1	6
hsa04146	Peroxisome	5/142	82/8206	0.0135996	0.0248679	0.010123	ACSL3/ACSL4/NOS2/PRDX1/SCP2	5
hsa01212	Fatty acid metabolism	4/142	57/8206	0.0167192	0.0303555	0.0123569	ACSL3/ACSL4/SCD/SCP2	4
hsa04934	Cushing syndrome	7/142	155/8206	0.017848	0.0321767	0.0130982	ATF4/CDKN1A/FH/MAPK1/MAPK3/RB1/SP1	7
hsa04727	GABAergic synapse	5/142	89/8206	0.0188074	0.0336692	0.0137058	GABARAPL1/GABARAPL2/GLS2/SLC38A1/SRC	5
hsa05323	Rheumatoid arthritis	5/142	93/8206	0.0223031	0.03965	0.0161404	ATP6V1G2/IFNG/IL6/JUN/TLR4	5
hsa04350	TGF-beta signaling pathway	5/142	95/8206	0.0241992	0.0427241	0.0173918	ACVR1B/IFNG/MAPK1/MAPK3/SP1	5
hsa04630	JAK-STAT signaling pathway	7/142	166/8206	0.0249281	0.0437095	0.0177929	CDKN1A/HRAS/IFNG/IL6/PIK3CA/SOCS1/STAT3	7
hsa04728	Dopaminergic synapse	6/142	132/8206	0.0267613	0.0466048	0.0189715	ARNTL/ATF4/DRD4/MAPK14/MAPK8/MAPK9	6
hsa04530	Tight junction	7/142	169/8206	0.0271524	0.0469663	0.0191187	JUN/MAP3K5/MAPK8/MAPK9/NF2/PRKAA1/SRC	7
hsa04015	Rap1 signaling pathway	8/142	210/8206	0.0291208	0.0500331	0.0203671	HRAS/KRAS/MAPK1/MAPK14/MAPK3/NRAS/PIK3CA/SRC	8
hsa04916	Melanogenesis	5/142	101/8206	0.0305004	0.052054	0.0211897	HRAS/KRAS/MAPK1/MAPK3/NRAS	5
hsa04928	Parathyroid hormone synthesis, secretion and action	5/142	106/8206	0.0364742	0.0618371	0.0251722	ATF4/CDKN1A/MAPK1/MAPK3/SP1	5
hsa00061	Fatty acid biosynthesis	2/142	18/8206	0.0379579	0.0639291	0.0260238	ACSL3/ACSL4	2
hsa04360	Axon guidance	7/142	182/8206	0.0383526	0.0641717	0.0261225	HRAS/KRAS/MAPK1/MAPK3/NRAS/PIK3CA/SRC	7
hsa04918	Thyroid hormone synthesis	4/142	75/8206	0.0406327	0.0675452	0.0274958	ALB/ATF4/DUOX1/HSPA5	4
hsa04072	Phospholipase D signaling pathway	6/142	148/8206	0.0431697	0.0708425	0.028838	HRAS/KRAS/MAPK1/MAPK3/NRAS/PIK3CA	6
hsa04723	Retrograde endocannabinoid signaling	6/142	148/8206	0.0431697	0.0708425	0.028838	MAPK1/MAPK14/MAPK3/MAPK8/MAPK9/PTGS2	6
hsa04714	Thermogenesis	8/142	232/8206	0.0479108	0.078122	0.0318013	ACSL3/ACSL4/HRAS/KRAS/MAP3K5/MAPK14/NRAS/PRKAA1	8
