# Supplementary material for: Identification of Key Ferroptosis-Related Genes in the Peripheral Blood of Patients with Relapsing-Remitting Multiple Sclerosis and Its Diagnostic Value
Source: Int J Mol Sci. 2023 Mar 29;24(7):6399. doi: 10.3390/ijms24076399 (PMC10094542; doi:10.3390/ijms24076399)
Supplement: Supplementary file 1 [file ijms-24-06399-s001.zip › Supplementary File 5.xlsx]

## Sheet: Sheet1
Supplementary File 5. The table of 2952 RRMS-related module genes.
probes	moduleColor	GS.Con	p.GS.Con	GS.RRMS	p.GS.RRMS	MMblue	p.MMblue	MMgrey	p.MMgrey	MMturquoise	p.MMturquoise
GOPC	blue	0.100747	0.00294728	-0.100747	0.00294728	0.694142	6.50874e-126	0.0859294	0.0112724	0.0427793	0.207726
MCRS1	blue	0.0902552	0.00776267	-0.0902552	0.00776267	-0.411709	7.05507e-37	0.0712884	0.0356282	0.106336	0.00169502
ITPR1	blue	0.163225	1.31666e-06	-0.163225	1.31666e-06	0.33023	1.48237e-23	0.0158249	0.641317	0.128784	0.000140775
TRIM62	blue	-0.0366565	0.280411	0.0366565	0.280411	-0.400865	7.03059e-35	0.00253038	0.940624	-0.0017216	0.959582
TRAM2	blue	-0.125563	0.000206587	0.125563	0.000206587	-0.41669	8.04912e-38	0.172603	3.06721e-07	-0.109905	0.00117437
CSGALNACT2	blue	-0.0976094	0.00397489	0.0976094	0.00397489	0.45023	1.34524e-44	0.0522093	0.124073	-0.0992322	0.00340859
DCUN1D5	blue	-0.291796	1.61697e-18	0.291796	1.61697e-18	0.546257	9.43861e-69	0.0224881	0.507938	-0.373245	4.10677e-30
ZNF770	blue	0.335018	3.09511e-24	-0.335018	3.09511e-24	0.67142	5.98343e-115	0.0392011	0.248344	0.29735	3.3586e-19
BTBD10	blue	0.295451	5.77054e-19	-0.295451	5.77054e-19	0.702463	3.44927e-130	-0.0440404	0.194625	0.267159	1.14479e-15
ANKRD11	blue	0.086683	0.0105748	-0.086683	0.0105748	-0.477065	1.36288e-50	0.106017	0.00175057	0.131477	0.000101459
DENND4C	blue	-0.0191019	0.573883	0.0191019	0.573883	0.587724	7.63117e-82	0.137788	4.59295e-05	-0.0989042	0.00351677
ZNF260	blue	0.160336	2.02932e-06	-0.160336	2.02932e-06	0.595313	1.89182e-84	0.0147831	0.663427	0.0808938	0.0170731
DCLRE1A	blue	0.0583001	0.0858688	-0.0583001	0.0858688	0.437128	7.36294e-42	0.147342	1.29447e-05	0.0105727	0.755625
UBE2J1	blue	0.262507	3.67287e-15	-0.262507	3.67287e-15	0.545665	1.40819e-68	-0.0155579	0.646956	0.240981	6.02215e-13
SLC38A6	blue	-0.0256897	0.449448	0.0256897	0.449448	0.545608	1.46361e-68	-0.036607	0.281061	-0.0867503	0.0105143
IFNGR1	blue	-0.0603448	0.0754117	0.0603448	0.0754117	0.495308	5.54781e-55	0.00686228	0.839914	-0.0976914	0.00394437
OTUD5	blue	0.195342	6.3913e-09	-0.195342	6.3913e-09	-0.596273	8.75904e-85	-0.0629177	0.0637525	0.284206	1.31055e-17
DAB2	blue	-0.0723068	0.0330693	0.0723068	0.0330693	-0.163584	1.24708e-06	-0.122213	0.000304946	-0.0382459	0.260067
SLC2A8	blue	0.0397707	0.241531	-0.0397707	0.241531	-0.19191	1.1826e-08	0.0809165	0.0170419	0.053107	0.117728
ENG	blue	-0.0949782	0.00507629	0.0949782	0.00507629	-0.551074	3.52658e-70	0.0230203	0.497948	-0.0470516	0.165809
CLCF1	blue	-0.0416477	0.220015	0.0416477	0.220015	-0.168747	5.63762e-07	0.16125	1.77119e-06	-0.0482534	0.155249
ATIC	blue	-0.0231773	0.495019	0.0231773	0.495019	-0.306132	2.6066e-20	0.0895494	0.0082584	-0.0686222	0.0431378
EDEM2	blue	0.0794499	0.0191592	-0.0794499	0.0191592	-0.358846	8.35615e-28	-0.0206884	0.542487	0.125156	0.000216718
UGDH	blue	0.180648	8.24039e-08	-0.180648	8.24039e-08	0.626562	5.99473e-96	0.0388465	0.252651	0.128674	0.00014266
USP34	blue	-0.0179002	0.598223	0.0179002	0.598223	-0.159177	2.40895e-06	0.156027	3.81505e-06	-0.00699413	0.836881
VPS36	blue	0.505386	1.59448e-57	-0.505386	1.59448e-57	0.743202	1.75281e-153	0.0218606	0.519853	0.438134	4.58152e-42
CREBZF	blue	-0.0930838	0.00603244	0.0930838	0.00603244	0.739727	2.51484e-151	0.114081	0.000754008	-0.170345	4.388e-07
CLSTN1	blue	-0.0414986	0.221672	0.0414986	0.221672	-0.540838	3.5768e-67	0.0954102	0.00487839	-0.0249066	0.463391
RAB18	blue	0.416327	9.44037e-38	-0.416327	9.44037e-38	0.705471	9.02558e-132	-0.0611244	0.0717084	0.388093	1.28129e-32
AKAP13	blue	-0.00548519	0.871727	0.00548519	0.871727	-0.536943	4.68138e-66	0.109507	0.001224	0.0376841	0.267138
RAP1B	blue	0.240868	6.17745e-13	-0.240868	6.17745e-13	0.824169	2.73803e-216	0.0693529	0.0409575	0.180226	8.84184e-08
ZBTB33	blue	0.216087	1.21837e-10	-0.216087	1.21837e-10	0.773056	1.43266e-173	0.00723296	0.831393	0.143695	2.11923e-05
OGG1	blue	0.0318148	0.348887	-0.0318148	0.348887	-0.228536	9.25221e-12	0.07186	0.0341719	0.0364561	0.283051
PIK3C2A	blue	0.198895	3.34045e-09	-0.198895	3.34045e-09	0.436755	8.77563e-42	0.0847916	0.0124032	0.172126	3.30955e-07
ARID3A	blue	-0.108709	0.00132961	0.108709	0.00132961	-0.399738	1.12311e-34	-0.0541787	0.11049	-0.0518357	0.12679
AKAP11	blue	0.459603	1.24549e-46	-0.459603	1.24549e-46	0.671057	8.78522e-115	0.0642419	0.0583575	0.399492	1.24374e-34
LPAR1	blue	0.0989423	0.00350403	-0.0989423	0.00350403	0.344857	1.13337e-25	-0.0621559	0.0670387	0.0871851	0.0101315
TMEM115	blue	0.0395973	0.243591	-0.0395973	0.243591	-0.350298	1.72875e-26	-0.0302583	0.372984	0.0784717	0.0206956
LACTB2	blue	0.126432	0.000186452	-0.126432	0.000186452	0.52905	7.75114e-64	0.0875559	0.00981473	0.0813268	0.0164876
PON2	blue	0.019271	0.570496	-0.019271	0.570496	0.370466	1.17005e-29	0.27884	5.53706e-17	-0.0357953	0.291873
PCNXL3	blue	0.035634	0.294055	-0.035634	0.294055	-0.469152	9.07393e-49	-0.0300249	0.376683	0.082592	0.0148765
ZUFSP	blue	0.0425753	0.209904	-0.0425753	0.209904	0.665551	2.82591e-112	0.131369	0.000102809	-0.0262794	0.439105
CCNG1	blue	0.306635	2.24565e-20	-0.306635	2.24565e-20	0.762268	5.70543e-166	0.0934863	0.00581667	0.240259	7.08657e-13
SLC39A10	blue	0.390512	4.86412e-33	-0.390512	4.86412e-33	0.751014	1.83963e-158	0.0407039	0.230655	0.325425	6.94784e-23
HDHD3	blue	-0.053326	0.11622	0.053326	0.11622	-0.202065	1.85329e-09	-0.0593532	0.0803456	-0.0731549	0.0310599
SH3TC1	blue	-0.0675816	0.0464112	0.0675816	0.0464112	-0.346662	6.09736e-26	-0.0518835	0.12644	-0.0383901	0.258273
BPNT1	blue	0.0171283	0.614098	-0.0171283	0.614098	0.467088	2.66374e-48	0.0244756	0.471167	-0.0373163	0.271839
GLCE	blue	0.386712	2.21891e-32	-0.386712	2.21891e-32	0.584564	8.86077e-81	-0.0264121	0.436798	0.351536	1.12124e-26
RIC8B	blue	0.223769	2.52796e-11	-0.223769	2.52796e-11	0.409984	1.48411e-36	0.126418	0.000186754	0.179127	1.06132e-07
RPGR	blue	0.0882716	0.0092283	-0.0882716	0.0092283	0.592361	1.9892e-83	-0.0337852	0.319835	0.0705469	0.0375956
PHTF1	blue	0.0333286	0.326422	-0.0333286	0.326422	0.410794	1.04719e-36	0.0665747	0.0497748	0.037797	0.265707
PHIP	blue	-0.0063494	0.851735	0.0063494	0.851735	0.652392	1.70693e-106	0.0293814	0.387002	-0.0681992	0.0444442
FARP2	blue	-0.0186386	0.58321	0.0186386	0.58321	-0.0979821	0.00383776	-0.0109738	0.746665	-0.0131895	0.697818
SLC33A1	blue	0.449502	1.92328e-44	-0.449502	1.92328e-44	0.639703	3.46028e-101	0.0929097	0.00612794	0.390192	5.53306e-33
CHMP2B	blue	0.563468	5.825e-74	-0.563468	5.825e-74	0.719953	1.11125e-139	0.0340065	0.316673	0.537878	2.53171e-66
ECT2	blue	0.27524	1.43048e-16	-0.27524	1.43048e-16	0.645997	8.67437e-104	-0.0389648	0.251209	0.234621	2.48084e-12
TIMM9	blue	0.122867	0.000282833	-0.122867	0.000282833	0.331647	9.35253e-24	0.0837754	0.0134966	0.0568893	0.0937435
RAB21	blue	0.647937	1.33094e-104	-0.647937	1.33094e-104	0.723618	9.21247e-142	0.0242014	0.476152	0.620956	8.64212e-94
TRIM2	blue	0.00752163	0.824771	-0.00752163	0.824771	0.220681	4.79009e-11	-0.0055183	0.870959	-0.0247135	0.466866
SMARCB1	blue	0.0521165	0.124744	-0.0521165	0.124744	-0.322225	1.91356e-22	0.0576931	0.0891892	0.0555754	0.101588
SULT1B1	blue	0.0114893	0.735202	-0.0114893	0.735202	0.422592	5.85707e-39	-0.105168	0.00190675	-0.00346069	0.918859
ZNF354A	blue	0.324131	1.0482e-22	-0.324131	1.0482e-22	0.586576	1.86615e-81	-0.0490465	0.148565	0.287121	5.91233e-18
EFR3A	blue	0.471021	3.39968e-49	-0.471021	3.39968e-49	0.726074	3.55467e-143	0.0575167	0.090173	0.422976	4.93091e-39
RALA	blue	0.01941	0.567718	-0.01941	0.567718	0.58742	9.67433e-82	0.00750042	0.825257	-0.0777637	0.0218737
ZFYVE16	blue	0.366189	5.74607e-29	-0.366189	5.74607e-29	0.58785	6.91726e-82	-0.0561989	0.097803	0.372598	5.24407e-30
HNMT	blue	-0.113948	0.000764934	0.113948	0.000764934	0.498607	8.34618e-56	-0.0902153	0.00778999	-0.168796	5.59521e-07
OAT	blue	0.226956	1.29425e-11	-0.226956	1.29425e-11	0.641919	4.27046e-102	0.0028366	0.933454	0.206649	7.77275e-10
ZNF615	blue	0.0480995	0.156572	-0.0480995	0.156572	0.550069	7.03351e-70	-0.049589	0.14412	-0.0269234	0.427969
DOHH	blue	-0.0938725	0.00561625	0.0938725	0.00561625	-0.392413	2.2601e-33	0.0264121	0.436797	-0.0731307	0.0311157
LTBR	blue	-0.01832	0.589666	0.01832	0.589666	-0.330699	1.27338e-23	-0.127752	0.000159351	0.0369345	0.276777
CXorf57	blue	0.0783241	0.0209365	-0.0783241	0.0209365	0.545336	1.75848e-68	0.11573	0.000630432	0.0174741	0.606963
TBC1D9B	blue	0.0391118	0.249424	-0.0391118	0.249424	-0.346565	6.30552e-26	0.00188813	0.955677	0.0402832	0.235515
TSPAN13	blue	0.154009	5.09819e-06	-0.154009	5.09819e-06	0.489733	1.2998e-53	-0.0446912	0.188106	0.109618	0.00121
POU2F2	blue	-0.379537	3.69234e-31	0.379537	3.69234e-31	-0.600011	4.25383e-86	-0.0450027	0.185042	-0.351311	1.2132e-26
FBXL5	blue	0.285839	8.39979e-18	-0.285839	8.39979e-18	0.642971	1.57159e-102	-0.0524308	0.122483	0.27623	1.1035e-16
ZKSCAN1	blue	0.0385847	0.255865	-0.0385847	0.255865	-0.161373	1.73897e-06	0.0755659	0.0259091	0.0536423	0.114067
BIN3	blue	0.00295995	0.930568	-0.00295995	0.930568	-0.177963	1.28622e-07	-0.100441	0.0030355	0.0320389	0.345501
ST6GALNAC6	blue	-0.00875514	0.79662	0.00875514	0.79662	-0.190194	1.60178e-08	0.158372	2.71167e-06	-0.0284045	0.40299
TFRC	blue	0.0239337	0.481046	-0.0239337	0.481046	0.530512	3.03865e-64	0.0711401	0.0360145	-0.0520502	0.125224
CHD1	blue	0.482523	7.05526e-52	-0.482523	7.05526e-52	0.744063	5.05463e-154	-0.0289505	0.394005	0.429548	2.49574e-40
RBM25	blue	0.15264	6.19317e-06	-0.15264	6.19317e-06	0.561858	1.84373e-73	0.130105	0.000119978	0.119753	0.000403427
ADO	blue	0.277211	8.52191e-17	-0.277211	8.52191e-17	0.741597	1.75447e-152	0.136986	5.08944e-05	0.221289	4.22699e-11
NAP1L1	blue	0.117532	0.000517045	-0.117532	0.000517045	0.79388	1.6714e-189	0.0389926	0.250871	0.0313583	0.35585
OR7E156P	blue	-0.049227	0.147075	0.049227	0.147075	-0.163844	1.1988e-06	0.0819857	0.0156304	-0.0454143	0.181052
RSF1	blue	0.114813	0.00069667	-0.114813	0.00069667	0.447841	4.3352e-44	0.0184987	0.586042	0.0889453	0.00870495
KIAA1033	blue	0.198638	3.50206e-09	-0.198638	3.50206e-09	0.804816	1.25322e-198	-0.0542342	0.110124	0.16364	1.23652e-06
ACTN4	blue	-0.182356	6.18592e-08	0.182356	6.18592e-08	-0.567129	4.14268e-75	0.0260637	0.442874	-0.126393	0.00018731
SSBP4	blue	0.064888	0.0558656	-0.064888	0.0558656	-0.253792	3.06827e-14	0.22998	6.79233e-12	0.0533336	0.116167
LHPP	blue	-0.0584021	0.0853208	0.0584021	0.0853208	-0.385991	2.95336e-32	-0.00181724	0.957339	-0.0467201	0.168815
CDK9	blue	0.0839778	0.0132723	-0.0839778	0.0132723	-0.413575	3.14256e-37	0.0853147	0.0118714	0.122195	0.000305589
DPH3	blue	-0.138398	4.24609e-05	0.138398	4.24609e-05	0.482471	7.2612e-52	-0.0938616	0.00562184	-0.176991	1.50865e-07
ADCY9	blue	-0.0798316	0.0185871	0.0798316	0.0185871	-0.257389	1.28996e-14	0.247125	1.47528e-13	-0.0689233	0.0422277
TBC1D15	blue	-0.174709	2.18695e-07	0.174709	2.18695e-07	0.713812	2.88432e-136	0.000638267	0.98501	-0.245848	1.98272e-13
AMT	blue	-0.125465	0.000208992	0.125465	0.000208992	-0.332583	6.88908e-24	0.0547906	0.106517	-0.132226	9.2513e-05
MED29	blue	0.0566113	0.0953613	-0.0566113	0.0953613	-0.214527	1.66519e-10	0.0397178	0.242159	0.0554163	0.102572
MED16	blue	0.136394	5.48812e-05	-0.136394	5.48812e-05	-0.479564	3.53663e-51	-0.0945744	0.0052678	0.194978	6.82568e-09
GRPEL2	blue	0.28641	7.18399e-18	-0.28641	7.18399e-18	0.692282	5.61104e-125	0.0397238	0.242087	0.214752	1.5921e-10
UCHL5	blue	0.152739	6.10695e-06	-0.152739	6.10695e-06	0.654206	2.83326e-107	0.161014	1.83456e-06	0.0907028	0.00746226
TLR10	blue	0.0663681	0.0504896	-0.0663681	0.0504896	0.435667	1.46176e-41	-0.0710962	0.0361296	0.0451294	0.183808
TMC6	blue	0.0195057	0.565811	-0.0195057	0.565811	-0.40211	4.18144e-35	0.122449	0.000296791	0.0020246	0.952477
KIAA1147	blue	0.066347	0.050563	-0.066347	0.050563	0.219569	6.0164e-11	0.160804	1.89299e-06	-0.00303689	0.928768
PPARGC1B	blue	-0.0167746	0.621434	0.0167746	0.621434	0.170853	4.04982e-07	0.000682145	0.98398	-0.0396002	0.243557
HADH	blue	0.230341	6.2848e-12	-0.230341	6.2848e-12	0.47189	2.14905e-49	0.129015	0.000136903	0.176653	1.59453e-07
DGKG	blue	-0.0530218	0.118319	0.0530218	0.118319	-0.312154	4.2926e-21	-0.0544124	0.108959	-0.00399963	0.906278
ZAP70	blue	-0.0780502	0.0213901	0.0780502	0.0213901	-0.396532	4.21761e-34	0.288806	3.71498e-18	-0.110594	0.00109267
H1FX	blue	0.0419185	0.217027	-0.0419185	0.217027	-0.380554	2.48966e-31	-0.0503688	0.137911	0.0381687	0.261031
ARMC1	blue	0.21864	7.27189e-11	-0.21864	7.27189e-11	0.662721	5.2395e-111	0.146245	1.50315e-05	0.147068	1.34383e-05
TRIP6	blue	0.0104219	0.759001	-0.0104219	0.759001	-0.325725	6.31379e-23	-0.126324	0.000188845	0.0461647	0.173942
DHX32	blue	0.123824	0.000253196	-0.123824	0.000253196	0.279835	4.24902e-17	0.00246838	0.942076	0.0886813	0.00890678
TOMM70A	blue	0.100561	0.00300067	-0.100561	0.00300067	0.567662	2.81198e-75	0.101595	0.00271441	0.019159	0.572739
NR1D2	blue	0.132072	9.42932e-05	-0.132072	9.42932e-05	0.386205	2.71308e-32	0.0325752	0.337483	0.0842041	0.0130254
TBC1D13	blue	0.0750321	0.0269812	-0.0750321	0.0269812	-0.491446	4.96315e-54	0.0199849	0.556303	0.105424	0.00185838
MYO1G	blue	-0.0186774	0.582428	0.0186774	0.582428	-0.392975	1.79992e-33	0.109152	0.00127	-0.0389962	0.250827
DNAJC10	blue	0.337999	1.15047e-24	-0.337999	1.15047e-24	0.751188	1.41832e-158	-0.0115825	0.733136	0.269756	5.91263e-16
GATA3	blue	0.0311752	0.358666	-0.0311752	0.358666	0.102125	0.00257775	0.195345	6.38781e-09	-0.0127318	0.707814
PEX14	blue	0.00584326	0.863433	-0.00584326	0.863433	-0.201168	2.19174e-09	0.0392719	0.247489	-0.0222287	0.512845
TTC21A	blue	-0.0115294	0.734312	0.0115294	0.734312	-0.213666	1.97643e-10	-0.167012	7.38196e-07	-0.00468575	0.890294
NMRAL1	blue	0.0407993	0.229563	-0.0407993	0.229563	-0.400435	8.40929e-35	0.0311002	0.359825	0.0439871	0.195165
GBAS	blue	0.313206	3.11955e-21	-0.313206	3.11955e-21	0.790551	7.79524e-187	0.0740256	0.0291067	0.254128	2.83151e-14
SAMD14	blue	-0.113895	0.000769275	0.113895	0.000769275	-0.261461	4.75861e-15	-0.216044	1.22908e-10	-0.0598936	0.0776254
UAP1L1	blue	-0.0147145	0.664895	0.0147145	0.664895	-0.30277	7.00803e-20	-0.0783909	0.0208273	-0.00279438	0.934443
NAT10	blue	0.0341922	0.314036	-0.0341922	0.314036	-0.407965	3.52316e-36	0.0737714	0.0296657	0.0243848	0.472815
LYPLA1	blue	0.0390964	0.24961	-0.0390964	0.24961	0.576397	4.42545e-78	0.131846	9.69574e-05	0.0168298	0.620288
CHRNA10	blue	-0.0611634	0.071527	0.0611634	0.071527	-0.206552	7.91973e-10	-0.0849973	0.0121916	-0.0164438	0.628331
DAAM1	blue	-0.0139705	0.68088	0.0139705	0.68088	0.336664	1.79465e-24	0.0423094	0.212766	-0.0734255	0.0304412
ZMYM1	blue	0.121405	0.000334519	-0.121405	0.000334519	0.667075	5.79309e-113	0.0664867	0.0500783	0.0480878	0.156673
HADHA	blue	0.104944	0.00195001	-0.104944	0.00195001	-0.464976	7.95806e-48	0.0139941	0.680373	0.140114	3.39952e-05
BTF3L4	blue	0.312123	4.33315e-21	-0.312123	4.33315e-21	0.658218	5.11532e-109	-0.0268943	0.428468	0.259268	8.16005e-15
ZNF700	blue	0.0522399	0.123852	-0.0522399	0.123852	0.677212	1.19126e-117	0.144604	1.87631e-05	-0.00358886	0.915865
MEF2D	blue	0.0500964	0.140056	-0.0500964	0.140056	-0.387113	1.89249e-32	-0.00688464	0.8394	0.115304	0.000660464
C11orf57	blue	0.182815	5.72404e-08	-0.182815	5.72404e-08	0.60552	4.58083e-88	-0.0420314	0.21579	0.119102	0.000434066
POU2F1	blue	-0.0121997	0.7195	0.0121997	0.7195	-0.494909	6.96536e-55	0.00330428	0.922515	0.0394838	0.244946
SLC16A5	blue	0.0617472	0.0688581	-0.0617472	0.0688581	-0.425109	1.88631e-39	-0.0840012	0.0132466	0.132712	8.71212e-05
C3orf38	blue	-0.296602	4.15941e-19	0.296602	4.15941e-19	0.583921	1.45418e-80	0.0118372	0.727498	-0.359339	6.99879e-28
LRRC58	blue	0.510886	6.01581e-59	-0.510886	6.01581e-59	0.745172	1.01123e-154	0.0133651	0.693997	0.451953	5.75027e-45
SLC4A7	blue	0.405016	1.23208e-35	-0.405016	1.23208e-35	0.654028	3.38161e-107	0.13269	8.73527e-05	0.331847	8.76193e-24
RLTPR	blue	-0.0536751	0.113846	0.0536751	0.113846	-0.480009	2.77739e-51	-0.0796953	0.0187897	-0.0598318	0.0779327
SH3BP2	blue	-0.0164993	0.627171	0.0164993	0.627171	-0.3146	2.03891e-21	0.0296287	0.383015	0.0348014	0.305487
MTM1	blue	0.216788	1.05803e-10	-0.216788	1.05803e-10	0.668934	8.26296e-114	0.0131308	0.699096	0.192335	1.09642e-08
DDX46	blue	0.229102	8.19844e-12	-0.229102	8.19844e-12	0.680835	2.26362e-119	0.114968	0.000685021	0.181489	7.15693e-08
PDGFRB	blue	-0.0413351	0.223499	0.0413351	0.223499	-0.122593	0.000291918	0.224902	1.99495e-11	-0.0377406	0.266421
UBE2G1	blue	0.120745	0.000360598	-0.120745	0.000360598	0.489095	1.85811e-53	0.117492	0.000519366	0.121755	0.00032141
NOLC1	blue	0.0140112	0.680003	-0.0140112	0.680003	-0.225479	1.76742e-11	0.169603	4.93111e-07	0.0239268	0.481171
FAM58A	blue	0.0447008	0.188011	-0.0447008	0.188011	0.17793	1.29334e-07	0.0538673	0.112555	-0.0248031	0.465253
FAM96A	blue	0.0398082	0.241087	-0.0398082	0.241087	0.701497	1.10116e-129	0.0130448	0.700973	-0.0483311	0.154585
ARRDC1	blue	-2.12822e-05	0.9995	2.12822e-05	0.9995	-0.279171	5.07019e-17	-0.0548319	0.106253	0.0361096	0.287654
CCBL1	blue	0.0339718	0.317167	-0.0339718	0.317167	-0.217117	9.90224e-11	-0.0335271	0.323547	0.0245025	0.470681
CLN5	blue	0.200815	2.34046e-09	-0.200815	2.34046e-09	0.654899	1.42335e-107	-0.0514996	0.129275	0.160054	2.116e-06
CDC7	blue	0.0936484	0.00573179	-0.0936484	0.00573179	0.54489	2.37603e-68	0.131543	0.000100629	0.0431181	0.204145
NPR1	blue	0.0486542	0.151843	-0.0486542	0.151843	-0.305633	3.02122e-20	-0.0923274	0.00645739	0.088237	0.00925593
ZNF680	blue	-0.0286409	0.399084	0.0286409	0.399084	0.567517	3.12538e-75	-0.00301443	0.929293	-0.0957007	0.00474927
PPID	blue	0.0503963	0.137695	-0.0503963	0.137695	0.326192	5.43938e-23	-0.0843578	0.01286	0.028277	0.405105
KLHL9	blue	0.520595	1.59412e-61	-0.520595	1.59412e-61	0.689369	1.58609e-123	0.0973026	0.00409111	0.478036	8.08018e-51
C4orf27	blue	-0.03047	0.369647	0.03047	0.369647	0.356727	1.78633e-27	0.112119	0.000930238	-0.103397	0.00227468
GPD1L	blue	0.0934179	0.00585284	-0.0934179	0.00585284	0.567951	2.2779e-75	0.157974	2.8743e-06	0.025738	0.448596
PLXND1	blue	-0.056742	0.0945982	0.056742	0.0945982	-0.528539	1.07423e-63	0.0425776	0.209879	-0.0152908	0.652615
TRPS1	blue	-0.0041824	0.902016	0.0041824	0.902016	-0.0660599	0.0515718	0.00783294	0.817644	0.00590528	0.861998
DOK2	blue	0.0877079	0.00968745	-0.0877079	0.00968745	-0.389635	6.91677e-33	0.0870369	0.0102605	0.111342	0.00101001
RBM45	blue	0.0786759	0.0203664	-0.0786759	0.0203664	0.25945	7.80392e-15	0.170307	4.41435e-07	0.0319537	0.346787
CASC4	blue	-0.0756469	0.0257496	0.0756469	0.0257496	0.423128	4.60598e-39	0.0465713	0.170177	-0.0871574	0.0101554
GABPA	blue	0.166734	7.70517e-07	-0.166734	7.70517e-07	0.608976	2.55167e-89	0.0677713	0.0457994	0.123942	0.000249721
NIPA1	blue	0.0100244	0.767925	-0.0100244	0.767925	0.486771	6.78472e-53	0.113668	0.000788356	-0.051705	0.127752
FEM1C	blue	0.54766	3.64385e-69	-0.54766	3.64385e-69	0.66602	1.73705e-112	-0.00640809	0.85038	0.526811	3.22326e-63
SLAMF7	blue	-0.0141473	0.67707	0.0141473	0.67707	-0.133294	8.10396e-05	0.451478	7.27359e-45	-0.0237025	0.485293
PFKL	blue	0.0827168	0.0147254	-0.0827168	0.0147254	-0.542721	1.01909e-67	-0.109744	0.00119424	0.133614	7.78763e-05
STK17A	blue	0.145673	1.62437e-05	-0.145673	1.62437e-05	0.493448	1.59929e-54	0.00527201	0.876671	0.123645	0.0002585
STARD3NL	blue	0.316449	1.15585e-21	-0.316449	1.15585e-21	0.741177	3.19837e-152	0.000603271	0.985832	0.275622	1.29435e-16
ST8SIA4	blue	0.558803	1.61295e-72	-0.558803	1.61295e-72	0.637437	2.89001e-100	-0.039602	0.243535	0.552653	1.18658e-70
MOSPD2	blue	-0.0587794	0.0833178	0.0587794	0.0833178	0.489289	1.66708e-53	-0.0726802	0.0321713	-0.0774797	0.0223624
TOPORS	blue	0.216044	1.22913e-10	-0.216044	1.22913e-10	0.539731	7.45146e-67	-0.0480056	0.157384	0.215154	1.46898e-10
PPP1R2	blue	0.133079	8.32396e-05	-0.133079	8.32396e-05	0.640164	2.24314e-101	0.0563537	0.0968806	0.0768543	0.023472
ZNF529	blue	0.0149755	0.659321	-0.0149755	0.659321	0.598255	1.77132e-85	0.144061	2.01809e-05	-0.0676537	0.0461777
CYB5R4	blue	0.529179	7.14058e-64	-0.529179	7.14058e-64	0.638978	6.83618e-101	-0.028513	0.401195	0.521952	6.84604e-62
NKRF	blue	0.0318135	0.348907	-0.0318135	0.348907	0.520102	2.16364e-61	0.0826325	0.0148273	-0.0414732	0.221955
TTC33	blue	0.335061	3.05124e-24	-0.335061	3.05124e-24	0.759763	2.90953e-164	0.0105991	0.755036	0.286084	7.85524e-18
FAM8A1	blue	0.502701	7.72708e-57	-0.502701	7.72708e-57	0.703273	1.2988e-130	-0.0195066	0.565793	0.482724	6.32025e-52
ZNF580	blue	0.075819	0.0254139	-0.075819	0.0254139	-0.448477	3.17843e-44	-0.0996814	0.00326532	0.110488	0.00110489
RNF219	blue	-0.0268768	0.428771	0.0268768	0.428771	0.67541	8.37129e-117	-0.0220284	0.516651	-0.104209	0.00209863
TIAM2	blue	0.0109946	0.746202	-0.0109946	0.746202	0.120171	0.000384823	-0.0604673	0.0748197	0.0248331	0.464713
SLC9A1	blue	0.0705399	0.0376147	-0.0705399	0.0376147	-0.386979	1.99641e-32	-0.122966	0.000279624	0.14374	2.10664e-05
ALG6	blue	0.0926484	0.00627387	-0.0926484	0.00627387	0.694002	7.65443e-126	0.0857526	0.0114418	0.0370582	0.27517
NUDT21	blue	0.469655	6.96993e-49	-0.469655	6.96993e-49	0.780323	6.23462e-179	0.0301395	0.374864	0.417849	4.83166e-38
GDPD3	blue	-0.199663	2.89886e-09	0.199663	2.89886e-09	-0.435922	1.29709e-41	-0.12133	0.000337372	-0.162106	1.55834e-06
SKIV2L2	blue	-0.0565156	0.0959238	0.0565156	0.0959238	0.677494	8.77011e-118	0.0311274	0.359405	-0.15474	4.59202e-06
IKZF5	blue	0.377922	6.88738e-31	-0.377922	6.88738e-31	0.748513	7.5617e-157	0.0711171	0.0360748	0.337283	1.46063e-24
WARS2	blue	0.0935617	0.00577709	-0.0935617	0.00577709	0.231545	4.84801e-12	0.00422256	0.90108	0.0712022	0.0358524
GPI	blue	0.097089	0.00417381	-0.097089	0.00417381	-0.551385	2.8473e-70	0.0287315	0.397593	0.139533	3.66629e-05
TNFRSF10C	blue	-0.105188	0.00190304	0.105188	0.00190304	-0.407838	3.71952e-36	-0.134748	6.7568e-05	-0.0212718	0.53116
CCDC88A	blue	0.327065	4.11314e-23	-0.327065	4.11314e-23	0.531183	1.97485e-64	0.000585041	0.98626	0.290554	2.28725e-18
ATG5	blue	0.335814	2.37835e-24	-0.335814	2.37835e-24	0.776105	8.53538e-176	0.00437613	0.897502	0.266276	1.43104e-15
AHI1	blue	-0.0528349	0.119624	0.0528349	0.119624	0.326368	5.14209e-23	0.0626377	0.0649448	-0.103995	0.00214366
TRIM56	blue	-0.0136442	0.687939	0.0136442	0.687939	-0.326534	4.87653e-23	-0.0135643	0.68967	0.000674571	0.984158
HSF2	blue	-0.00826111	0.807865	0.00826111	0.807865	0.470171	5.31603e-49	0.0607341	0.0735432	-0.0814468	0.0163285
SUPT6H	blue	0.0321516	0.343806	-0.0321516	0.343806	-0.640227	2.11431e-101	-0.0685058	0.043494	0.101344	0.00278165
RRM2B	blue	-0.00611217	0.857214	0.00611217	0.857214	0.726457	2.13182e-143	-0.0172925	0.610706	-0.0356317	0.294086
TIGD7	blue	0.314336	2.21056e-21	-0.314336	2.21056e-21	0.635993	1.10628e-99	-0.0325721	0.337529	0.259948	6.90726e-15
IFT57	blue	0.39488	8.29283e-34	-0.39488	8.29283e-34	0.628544	1.00851e-96	-0.0702067	0.0385288	0.321394	2.48529e-22
FAAH	blue	0.0908428	0.00737045	-0.0908428	0.00737045	-0.320714	3.07475e-22	-0.0598632	0.077776	0.129439	0.000130071
PHACTR2	blue	0.0249899	0.461897	-0.0249899	0.461897	0.0960924	0.00458007	0.187057	2.77022e-08	0.00140631	0.96698
PDHX	blue	0.420938	1.22721e-38	-0.420938	1.22721e-38	0.728465	1.44338e-144	0.0165931	0.625214	0.362602	2.14347e-28
PPP1R12C	blue	-0.0304706	0.369638	0.0304706	0.369638	-0.406287	7.1945e-36	0.0094911	0.779946	0.00967921	0.7757
ICAM1	blue	0.0396167	0.24336	-0.0396167	0.24336	-0.268148	8.91058e-16	-0.0688333	0.042498	0.0947215	0.00519732
SPIRE1	blue	0.136547	5.38201e-05	-0.136547	5.38201e-05	0.338399	1.00678e-24	0.0964907	0.00441359	0.114749	0.000701466
FUBP3	blue	0.0864074	0.0108253	-0.0864074	0.0108253	0.221273	4.24125e-11	0.187909	2.38937e-08	0.0615707	0.0696561
ICOS	blue	-0.0821469	0.0154267	0.0821469	0.0154267	0.503778	4.10903e-57	-0.0530423	0.118177	-0.169537	4.98264e-07
EMP1	blue	0.00777829	0.818894	-0.00777829	0.818894	0.164212	1.13376e-06	0.00057193	0.986568	-0.00557764	0.869584
SENP6	blue	0.0205217	0.545746	-0.0205217	0.545746	0.751736	6.24048e-159	0.0158849	0.640055	-0.0393203	0.246907
ZNF142	blue	-0.0858221	0.011375	0.0858221	0.011375	-0.352992	6.72105e-27	0.047143	0.164988	-0.0875973	0.00977991
RHOT2	blue	0.072776	0.0319443	-0.072776	0.0319443	-0.291847	1.59431e-18	0.00132482	0.968892	0.0829303	0.01447
TCF12	blue	0.32813	2.92209e-23	-0.32813	2.92209e-23	0.636363	7.85149e-100	0.118707	0.000453695	0.265704	1.65256e-15
CAND1	blue	0.40288	3.02801e-35	-0.40288	3.02801e-35	0.718464	7.62567e-139	0.0696311	0.0401523	0.331806	8.88031e-24
ESCO1	blue	0.212964	2.27125e-10	-0.212964	2.27125e-10	0.633179	1.4846e-98	0.0172183	0.612238	0.154176	4.97815e-06
PRMT3	blue	0.180728	8.13072e-08	-0.180728	8.13072e-08	0.717022	4.86353e-138	0.12193	0.000315033	0.133007	8.39917e-05
HMHA1	blue	0.0872298	0.0100928	-0.0872298	0.0100928	-0.416497	8.76158e-38	-0.0380901	0.262014	0.12685	0.000177433
TAOK2	blue	-0.0308438	0.363802	0.0308438	0.363802	-0.482999	5.43652e-52	-0.0822325	0.0153196	0.0210087	0.536253
EAF1	blue	0.274685	1.65387e-16	-0.274685	1.65387e-16	0.473809	7.76826e-50	0.0646129	0.0569154	0.269114	6.96711e-16
LIG1	blue	0.0641715	0.0586344	-0.0641715	0.0586344	-0.191359	1.30413e-08	0.0145409	0.668612	0.0456434	0.178859
ANGEL2	blue	0.165916	8.73984e-07	-0.165916	8.73984e-07	0.692751	3.26594e-125	0.120816	0.000357688	0.0969422	0.00423153
HDHD2	blue	0.0355523	0.295163	-0.0355523	0.295163	0.62937	4.78181e-97	0.0403751	0.234447	-0.0464603	0.171199
TRMT12	blue	0.171398	3.71541e-07	-0.171398	3.71541e-07	0.394648	9.1171e-34	-0.0015784	0.962942	0.13393	7.48695e-05
SERINC1	blue	0.50956	1.33288e-58	-0.50956	1.33288e-58	0.705363	1.02916e-131	-0.0177662	0.600965	0.473751	8.01182e-50
PDGFD	blue	-0.0430452	0.204911	0.0430452	0.204911	0.22514	1.8977e-11	0.510111	9.58409e-59	-0.0825929	0.0148754
PAFAH2	blue	-0.0113508	0.738276	0.0113508	0.738276	-0.163543	1.25489e-06	0.20584	9.07404e-10	-0.023365	0.491532
PDCD5	blue	0.0549661	0.105399	-0.0549661	0.105399	0.287406	5.4659e-18	0.0852945	0.0118915	-0.00450627	0.894471
CXorf38	blue	0.0428785	0.206672	-0.0428785	0.206672	0.148427	1.11535e-05	-0.0322023	0.343045	0.0444466	0.190536
CDK5	blue	-0.0556689	0.101013	0.0556689	0.101013	-0.326515	4.90554e-23	-0.00338135	0.920714	-0.0407115	0.230568
PIK3R5	blue	0.0264092	0.436849	-0.0264092	0.436849	-0.237606	1.2829e-12	0.0310829	0.360093	0.0788006	0.0201675
KLHL8	blue	-0.0327769	0.334498	0.0327769	0.334498	0.423975	3.14665e-39	-0.0912813	0.00708941	-0.0518327	0.126813
HMGCR	blue	0.255733	1.92564e-14	-0.255733	1.92564e-14	0.653991	3.5095e-107	-0.0107409	0.751864	0.249012	9.50279e-14
PRKCD	blue	0.0388915	0.252103	-0.0388915	0.252103	-0.399522	1.22832e-34	-0.0428104	0.207395	0.13327	8.12825e-05
ARHGDIA	blue	-0.105645	0.00181744	0.105645	0.00181744	-0.538784	1.39428e-66	0.0384634	0.257365	-0.0920194	0.00663803
GLOD4	blue	0.142832	2.3773e-05	-0.142832	2.3773e-05	0.312835	3.49189e-21	0.0799093	0.0184725	0.0761928	0.0246972
MAN1A1	blue	0.471389	2.80028e-49	-0.471389	2.80028e-49	0.6518	3.05856e-106	-0.00364332	0.914593	0.470336	4.87478e-49
D2HGDH	blue	-0.0755319	0.0259763	0.0755319	0.0259763	-0.372065	6.41382e-30	0.0600737	0.0767354	-0.0919918	0.0066544
CLK1	blue	-0.0751872	0.0266657	0.0751872	0.0266657	0.614968	1.56634e-91	0.146714	1.41037e-05	-0.139385	3.73769e-05
RXRB	blue	0.0091791	0.787003	-0.0091791	0.787003	-0.338317	1.03477e-24	-0.00717415	0.832744	0.0418842	0.217404
ZNF175	blue	0.0846524	0.0125482	-0.0846524	0.0125482	0.32306	1.47085e-22	0.0291576	0.39063	0.0413231	0.223634
NIP7	blue	0.130108	0.000119934	-0.130108	0.000119934	0.524588	1.31277e-62	0.195847	5.83282e-09	0.0793789	0.0192672
SATB1	blue	0.00873782	0.797013	-0.00873782	0.797013	0.408867	2.39576e-36	-0.00635824	0.851531	-0.0409198	0.22819
RALGPS1	blue	-0.00994071	0.769808	0.00994071	0.769808	0.262904	3.32845e-15	0.11468	0.000706765	-0.0300042	0.377013
KLHL15	blue	0.431637	9.53745e-41	-0.431637	9.53745e-41	0.728622	1.16838e-144	-0.0373805	0.271014	0.388182	1.23659e-32
CPNE8	blue	0.207581	6.49865e-10	-0.207581	6.49865e-10	0.620596	1.18506e-93	0.0544138	0.108949	0.182906	5.63627e-08
TRIM21	blue	0.0814424	0.0163344	-0.0814424	0.0163344	-0.402	4.37834e-35	-0.134502	6.96924e-05	0.16337	1.28813e-06
CCDC14	blue	-0.0567851	0.0943478	0.0567851	0.0943478	0.593494	8.08744e-84	0.11534	0.000657834	-0.147569	1.25487e-05
YES1	blue	-0.0284281	0.402598	0.0284281	0.402598	0.518216	6.94089e-61	0.195178	6.5836e-09	-0.0913541	0.00704373
SP3	blue	0.505186	1.79404e-57	-0.505186	1.79404e-57	0.779514	2.52137e-178	0.00936088	0.782889	0.476769	1.59739e-50
DNAJB14	blue	-0.138838	4.01181e-05	0.138838	4.01181e-05	0.729553	3.32288e-145	0.0594782	0.0797093	-0.204878	1.09002e-09
ZNF493	blue	0.0288748	0.395243	-0.0288748	0.395243	0.222506	3.28695e-11	0.000539859	0.987321	-0.00364203	0.914624
DTX1	blue	-0.0287592	0.397138	0.0287592	0.397138	-0.236164	1.7664e-12	-0.127443	0.000165325	-0.0247312	0.466547
CD82	blue	-0.0276771	0.415147	0.0276771	0.415147	-0.376775	1.06997e-30	-0.0907264	0.00744676	0.0452934	0.182218
RNFT1	blue	-0.0280495	0.408897	0.0280495	0.408897	0.341853	3.1502e-25	0.157318	3.16331e-06	-0.0456965	0.178353
LRIG1	blue	0.0130154	0.701615	-0.0130154	0.701615	0.28893	3.58993e-18	0.106348	0.00169295	-0.0458128	0.177249
WRB	blue	0.214552	1.65678e-10	-0.214552	1.65678e-10	0.45126	8.10001e-45	-0.0693908	0.0408471	0.196232	5.43827e-09
HIGD1A	blue	-0.116553	0.0005761	0.116553	0.0005761	0.677533	8.40748e-118	0.00728381	0.830226	-0.193274	9.27336e-09
ZFX	blue	-0.0652076	0.0546659	0.0652076	0.0546659	0.527416	2.19569e-63	0.0195547	0.564836	-0.10365	0.0022184
NAPA	blue	0.11928	0.000425463	-0.11928	0.000425463	-0.554806	2.66249e-71	-0.102464	0.00249359	0.211785	2.86625e-10
SGSH	blue	0.0416334	0.220173	-0.0416334	0.220173	-0.338309	1.03738e-24	0.0400239	0.238545	0.0417832	0.218516
USP11	blue	0.0484606	0.153481	-0.0484606	0.153481	-0.59382	6.24074e-84	0.0721266	0.0335105	0.0779482	0.0215613
RCN3	blue	-0.136549	5.38097e-05	0.136549	5.38097e-05	-0.458593	2.07733e-46	-0.10217	0.00256639	-0.0683576	0.0439512
DCHS1	blue	0.0498561	0.141969	-0.0498561	0.141969	-0.155144	4.33302e-06	-0.12298	0.000279176	0.0446816	0.188201
ZCCHC7	blue	0.0111243	0.743313	-0.0111243	0.743313	0.420373	1.5788e-38	0.095937	0.00464655	-0.0687993	0.0426006
PRDX3	blue	-0.0188822	0.578297	0.0188822	0.578297	0.474256	6.1257e-50	0.143474	2.18266e-05	-0.0625257	0.0654266
MVP	blue	0.0852249	0.0119612	-0.0852249	0.0119612	-0.486477	7.98716e-53	-0.125004	0.000220614	0.17411	2.40889e-07
MTF1	blue	-0.0468297	0.167816	0.0468297	0.167816	-0.453222	3.06555e-45	-0.0843996	0.0128153	0.0139536	0.681246
SELT	blue	0.441877	7.73113e-43	-0.441877	7.73113e-43	0.702055	5.63511e-130	-0.000791726	0.981407	0.402842	3.07744e-35
NUDT14	blue	-0.027817	0.412792	0.027817	0.412792	-0.205331	1.00008e-09	0.0489056	0.149736	-0.0513009	0.130761
GSTCD	blue	0.0993461	0.00337174	-0.0993461	0.00337174	0.379272	4.09188e-31	-0.0155695	0.64671	0.0363386	0.284605
HSPA14	blue	0.350114	1.84346e-26	-0.350114	1.84346e-26	0.710424	2.02073e-134	0.00310165	0.927253	0.281852	2.47565e-17
MYNN	blue	0.0805117	0.0176049	-0.0805117	0.0176049	0.465227	6.99281e-48	-0.0245622	0.469599	0.0322903	0.341728
USO1	blue	0.091162	0.00716495	-0.091162	0.00716495	0.611386	3.33423e-90	0.12055	0.00036866	0.0518327	0.126812
STAU2	blue	0.516551	1.93113e-60	-0.516551	1.93113e-60	0.665464	3.09537e-112	-0.0028625	0.932848	0.480933	1.68042e-51
ARHGEF19	blue	0.0221518	0.514305	-0.0221518	0.514305	-0.146352	1.48161e-05	0.0907252	0.00744752	0.00750305	0.825197
RDH5	blue	-0.156203	3.71918e-06	0.156203	3.71918e-06	-0.43043	1.66389e-40	-0.00914451	0.787786	-0.120829	0.00035716
ZCCHC11	blue	0.0797484	0.0187105	-0.0797484	0.0187105	0.262772	3.43947e-15	0.211891	2.8068e-10	0.0562112	0.097729
FAM84B	blue	-0.0360923	0.287885	0.0360923	0.287885	0.498547	8.6376e-56	0.131867	9.67033e-05	-0.111874	0.000954675
LENG8	blue	0.100212	0.00310311	-0.100212	0.00310311	-0.434001	3.18382e-41	0.0320363	0.345541	0.112809	0.000864357
ZNF609	blue	0.0247979	0.465345	-0.0247979	0.465345	-0.443432	3.66754e-43	0.0501344	0.139755	0.0515643	0.128794
TMEM135	blue	0.33397	4.37056e-24	-0.33397	4.37056e-24	0.609224	2.0714e-89	0.0417346	0.219053	0.282913	1.86006e-17
SCYL2	blue	0.54607	1.07137e-68	-0.54607	1.07137e-68	0.717647	2.18039e-138	0.069579	0.0403022	0.526166	4.85e-63
CPNE5	blue	-0.0239792	0.480212	0.0239792	0.480212	-0.309913	8.44013e-21	-0.128503	0.000145618	0.00764605	0.821921
PKIA	blue	0.365569	7.22477e-29	-0.365569	7.22477e-29	0.649075	4.40447e-105	-0.0570207	0.0929868	0.304461	4.26884e-20
DNHD1	blue	0.0168301	0.620281	-0.0168301	0.620281	-0.214172	1.78714e-10	-0.00877185	0.79624	0.00451065	0.894369
UBN1	blue	0.00574802	0.865638	-0.00574802	0.865638	-0.443748	3.15038e-43	-0.0198997	0.557988	0.0648565	0.0559851
SUCLG2	blue	0.15437	4.84191e-06	-0.15437	4.84191e-06	0.597709	2.75267e-85	0.0437278	0.197815	0.0979836	0.00383722
STAM	blue	0.390127	5.67944e-33	-0.390127	5.67944e-33	0.606138	2.74094e-88	0.0116129	0.732462	0.37468	2.3813e-30
ITGB1	blue	0.0510253	0.132845	-0.0510253	0.132845	0.584972	6.4667e-81	0.284691	1.14857e-17	-0.00455619	0.893309
IMPA1	blue	0.307374	1.80334e-20	-0.307374	1.80334e-20	0.805624	2.51504e-199	-0.0166099	0.624864	0.254876	2.36649e-14
CD7	blue	-0.0686574	0.0430306	0.0686574	0.0430306	-0.315715	1.44893e-21	0.134508	6.9643e-05	-0.106294	0.00170222
PIGX	blue	0.00281597	0.933937	-0.00281597	0.933937	0.176982	1.51106e-07	-0.0962667	0.00450651	0.00603959	0.858892
ZNF518A	blue	0.361854	2.81522e-28	-0.361854	2.81522e-28	0.779912	1.26943e-178	-0.0099214	0.770243	0.310174	7.8042e-21
THEM4	blue	0.0253432	0.455589	-0.0253432	0.455589	-0.00495673	0.883993	0.030573	0.36803	-0.0107605	0.751427
RBM7	blue	0.0302356	0.373343	-0.0302356	0.373343	0.706353	3.0716e-132	0.01371	0.686512	-0.0106535	0.753818
MRPL32	blue	-0.153973	5.1243e-06	0.153973	5.1243e-06	0.580782	1.60909e-79	0.00534068	0.875078	-0.245841	1.98577e-13
ZNF12	blue	-0.23691	1.49752e-12	0.23691	1.49752e-12	0.567563	3.02139e-75	0.0178099	0.600069	-0.297498	3.21936e-19
ABCE1	blue	0.335352	2.77158e-24	-0.335352	2.77158e-24	0.711019	9.62039e-135	0.0236023	0.487141	0.242661	4.11498e-13
FOXP3	blue	0.107171	0.00155706	-0.107171	0.00155706	-0.308466	1.30216e-20	-0.0585327	0.0846231	0.123996	0.000248168
KLHDC4	blue	0.017376	0.608983	-0.017376	0.608983	-0.192673	1.03246e-08	0.185297	3.75084e-08	-0.0157658	0.642565
CIDEB	blue	0.0486452	0.151918	-0.0486452	0.151918	-0.29135	1.83189e-18	0.00497173	0.883645	0.0925343	0.00633856
ISOC1	blue	0.398516	1.86276e-34	-0.398516	1.86276e-34	0.619017	4.71337e-93	0.0971298	0.00415787	0.365617	7.09731e-29
SF3A2	blue	-0.126218	0.000191238	0.126218	0.000191238	-0.368709	2.25639e-29	-0.00694593	0.83799	-0.130889	0.000109032
TMEM209	blue	0.287125	5.90527e-18	-0.287125	5.90527e-18	0.702469	3.42424e-130	0.119815	0.00040062	0.232583	3.87137e-12
CCDC86	blue	-0.00869076	0.798083	0.00869076	0.798083	-0.3563	2.08066e-27	0.0419095	0.217126	-0.0116202	0.732299
FAM122B	blue	0.299297	1.92021e-19	-0.299297	1.92021e-19	0.695566	1.23687e-126	0.139197	3.82984e-05	0.24533	2.23411e-13
TMEM30A	blue	0.0542829	0.109805	-0.0542829	0.109805	0.669157	6.53818e-114	0.0270236	0.426252	0.023438	0.490179
PLOD3	blue	0.0188762	0.578419	-0.0188762	0.578419	-0.355638	2.63325e-27	0.0548315	0.106255	0.0219578	0.517998
CRIPT	blue	-0.0165948	0.625178	0.0165948	0.625178	0.621655	4.67704e-94	-0.0661954	0.0510935	-0.0820972	0.0154893
ZDHHC14	blue	-0.0996515	0.0032747	0.0996515	0.0032747	-0.326383	5.11669e-23	0.148657	1.08053e-05	-0.1075	0.0015056
FOLR2	blue	0.0621237	0.0671806	-0.0621237	0.0671806	-0.267183	1.13792e-15	-0.0214594	0.527544	0.109272	0.00125424
UBL3	blue	0.664814	6.06719e-112	-0.664814	6.06719e-112	0.694156	6.40381e-126	0.0368473	0.277913	0.627378	2.88239e-96
HDAC6	blue	0.116699	0.000566866	-0.116699	0.000566866	-0.515335	4.06371e-60	-0.0744404	0.0282137	0.161594	1.68244e-06
SLC39A8	blue	0.454983	1.27514e-45	-0.454983	1.27514e-45	0.633355	1.26263e-98	0.0153841	0.650635	0.3833	8.52378e-32
CDKN2AIP	blue	0.0847108	0.0124871	-0.0847108	0.0124871	0.730034	1.72965e-145	0.0425707	0.209952	0.0298164	0.380007
PES1	blue	0.115655	0.000635642	-0.115655	0.000635642	-0.34427	1.38505e-25	-0.0100194	0.768038	0.133842	7.56904e-05
THOC7	blue	-0.0190677	0.57457	0.0190677	0.57457	0.537643	2.95536e-66	-0.0106187	0.754596	-0.0928074	0.00618471
HAPLN3	blue	0.0192379	0.571159	-0.0192379	0.571159	-0.13443	7.03211e-05	-0.0935841	0.00576531	-0.0158649	0.640476
EXOSC6	blue	0.0298226	0.379908	-0.0298226	0.379908	0.149101	1.01629e-05	0.126435	0.000186375	-0.026201	0.440474
WBP4	blue	-0.0497821	0.142563	0.0497821	0.142563	0.629512	4.2033e-97	0.0249455	0.462693	-0.104344	0.00207052
AGA	blue	0.170883	4.03093e-07	-0.170883	4.03093e-07	0.443848	3.00199e-43	0.110402	0.00111486	0.11742	0.000523524
LOC202181	blue	0.0207892	0.540522	-0.0207892	0.540522	-0.2343	2.6613e-12	0.0350369	0.302223	0.0169445	0.617907
SACM1L	blue	0.52457	1.32794e-62	-0.52457	1.32794e-62	0.732095	1.04374e-146	0.0438531	0.196531	0.464085	1.26023e-47
UPB1	blue	-0.0123194	0.716865	0.0123194	0.716865	-0.171517	3.64595e-07	-0.0604467	0.0749188	0.0216032	0.52478
THBS3	blue	-0.129125	0.000135098	0.129125	0.000135098	-0.334054	4.25231e-24	-0.0676123	0.0463118	-0.111422	0.00100152
TNFAIP8L1	blue	-0.0825311	0.0149508	0.0825311	0.0149508	-0.325708	6.34879e-23	-0.0416909	0.219536	-0.0974738	0.00402588
RB1	blue	0.14837	1.12411e-05	-0.14837	1.12411e-05	0.706964	1.454e-132	0.0723377	0.0329941	0.127637	0.000161541
IBTK	blue	0.415491	1.36177e-37	-0.415491	1.36177e-37	0.71669	7.43748e-138	0.0498855	0.141734	0.34931	2.43878e-26
RASGRP4	blue	0.053406	0.115672	-0.053406	0.115672	-0.231042	5.40429e-12	-0.127442	0.000165355	0.0932318	0.00595225
BCKDHA	blue	0.0155465	0.647197	-0.0155465	0.647197	-0.337821	1.22113e-24	-0.0263376	0.438093	0.0339907	0.316898
PAQR3	blue	0.545436	1.64379e-68	-0.545436	1.64379e-68	0.765626	2.71932e-168	0.0475717	0.161175	0.490413	8.87873e-54
PIGK	blue	-0.0444389	0.190613	0.0444389	0.190613	0.67622	3.49013e-117	0.0158704	0.64036	-0.120128	0.000386712
FBXL3	blue	0.601721	1.05278e-86	-0.601721	1.05278e-86	0.712705	1.16358e-135	-0.00485791	0.88629	0.574527	1.79139e-77
SERP1	blue	0.617148	2.39019e-92	-0.617148	2.39019e-92	0.744185	4.23812e-154	0.00354482	0.916894	0.582134	5.73326e-80
MIB1	blue	0.452471	4.44929e-45	-0.452471	4.44929e-45	0.837338	1.3445e-229	-0.0283603	0.403721	0.40469	1.41405e-35
ATG9A	blue	0.0791501	0.019619	-0.0791501	0.019619	-0.579224	5.25212e-79	-0.108555	0.00135088	0.167969	6.36434e-07
MEPCE	blue	0.0760781	0.0249153	-0.0760781	0.0249153	-0.553842	5.20674e-71	-0.0101944	0.764106	0.104471	0.00204443
ACAD10	blue	-0.0065056	0.848131	0.0065056	0.848131	-0.443719	3.19469e-43	-0.00261519	0.938638	0.0114283	0.736555
NUAK1	blue	-0.0184883	0.586252	0.0184883	0.586252	-0.178038	1.27037e-07	0.229984	6.78613e-12	-0.0228364	0.501388
NAGPA	blue	0.0287378	0.397491	-0.0287378	0.397491	-0.292729	1.24471e-18	0.00240614	0.943534	0.0314645	0.354223
TMCO6	blue	0.0676911	0.0460571	-0.0676911	0.0460571	-0.347989	3.85722e-26	-0.0652702	0.0544336	0.105822	0.0017853
ABCB10	blue	0.24526	2.27027e-13	-0.24526	2.27027e-13	0.782658	1.06921e-180	0.0855512	0.0116377	0.198419	3.646e-09
SLC38A2	blue	0.364458	1.08714e-28	-0.364458	1.08714e-28	0.75631	6.05615e-162	0.0398193	0.240956	0.326389	5.10674e-23
VSIG1	blue	0.0943274	0.00538812	-0.0943274	0.00538812	0.315321	1.63502e-21	-0.0544382	0.108791	0.0499943	0.140867
GALE	blue	0.0834257	0.0138921	-0.0834257	0.0138921	-0.293466	1.0118e-18	-0.064436	0.0575994	0.116676	0.000568308
PM20D2	blue	0.410664	1.10774e-36	-0.410664	1.10774e-36	0.76524	5.0537e-168	-0.0040135	0.905954	0.355637	2.63452e-27
DCK	blue	0.258134	1.0763e-14	-0.258134	1.0763e-14	0.731341	2.92314e-146	0.101002	0.00287533	0.215529	1.36277e-10
SYAP1	blue	-0.0910633	0.0072279	0.0910633	0.0072279	-0.382568	1.13536e-31	-0.0759919	0.0250802	-0.067719	0.0459673
C1orf52	blue	0.0231505	0.495519	-0.0231505	0.495519	0.567527	3.10294e-75	0.0946608	0.00522631	-0.0428192	0.207302
SMARCA5	blue	0.287114	5.92289e-18	-0.287114	5.92289e-18	0.801312	1.21291e-195	-0.00622403	0.854629	0.228497	9.32795e-12
WDR36	blue	0.434426	2.61147e-41	-0.434426	2.61147e-41	0.609778	1.29873e-89	0.0970059	0.00420639	0.365796	6.64383e-29
ALDH16A1	blue	0.0387667	0.253629	-0.0387667	0.253629	-0.361846	2.82321e-28	0.00366984	0.913974	0.0547024	0.107082
MAPK6	blue	0.00366192	0.914159	-0.00366192	0.914159	0.732014	1.16496e-146	0.0566471	0.0951517	-0.0644883	0.0573962
LYRM5	blue	0.287707	5.03131e-18	-0.287707	5.03131e-18	0.725863	4.70513e-143	-0.0362126	0.286281	0.225472	1.76983e-11
GOLT1B	blue	0.451666	6.62791e-45	-0.451666	6.62791e-45	0.807064	1.41374e-200	0.0403	0.235319	0.391003	3.99248e-33
ZDHHC24	blue	0.0572352	0.0917613	-0.0572352	0.0917613	-0.329197	2.07134e-23	0.0843987	0.0128163	0.0814246	0.0163578
KIAA1468	blue	0.285448	9.34518e-18	-0.285448	9.34518e-18	0.75543	2.32875e-161	0.0635919	0.0609562	0.251364	5.46415e-14
RASGRP1	blue	0.308838	1.16494e-20	-0.308838	1.16494e-20	0.674878	1.48578e-116	0.127194	0.000170312	0.235307	2.13377e-12
PDGFC	blue	0.241613	5.22064e-13	-0.241613	5.22064e-13	0.529614	5.40628e-64	0.0128544	0.705132	0.225161	1.8894e-11
ANKRD50	blue	0.410416	1.23222e-36	-0.410416	1.23222e-36	0.672003	3.21956e-115	-0.0620486	0.0675125	0.380705	2.34732e-31
SLC7A1	blue	0.054224	0.110192	-0.054224	0.110192	-0.153742	5.29642e-06	0.0913083	0.00707243	0.0432898	0.202347
CEP135	blue	0.0116132	0.732455	-0.0116132	0.732455	0.528709	9.63696e-64	0.119207	0.000428993	-0.0318088	0.348978
HM13	blue	0.0453324	0.181841	-0.0453324	0.181841	-0.418792	3.18394e-38	0.0911501	0.0071725	0.0907453	0.00743429
ZNF646	blue	-0.0627762	0.0643525	0.0627762	0.0643525	-0.2591	8.50281e-15	-0.122278	0.000302676	-0.0239692	0.480395
PRPS1	blue	0.135859	5.87377e-05	-0.135859	5.87377e-05	0.294542	7.46717e-19	0.0507276	0.135124	0.0841331	0.0131024
SEC24A	blue	0.474003	7.00666e-50	-0.474003	7.00666e-50	0.658261	4.89453e-109	0.00805245	0.812627	0.429584	2.45558e-40
MORC3	blue	-0.0189827	0.576275	0.0189827	0.576275	0.733506	1.50236e-147	0.0336579	0.321662	-0.0682123	0.0444032
MTX3	blue	-0.0135615	0.689731	0.0135615	0.689731	0.617832	1.32163e-92	0.161182	1.78934e-06	-0.0817513	0.0159308
PHF5A	blue	0.115604	0.000639177	-0.115604	0.000639177	0.388122	1.26683e-32	-0.0317794	0.349424	0.079606	0.0189233
C10orf32	blue	0.0137358	0.685955	-0.0137358	0.685955	0.625928	1.05664e-95	0.0312365	0.357722	-0.050747	0.134974
CEBPG	blue	0.0828011	0.014624	-0.0828011	0.014624	0.426885	8.42684e-40	0.0758128	0.0254258	0.0308556	0.363617
PPIA	blue	0.0617169	0.0689947	-0.0617169	0.0689947	0.232719	3.75849e-12	0.0042898	0.899513	0.00917272	0.787147
ALOX15	blue	0.00819529	0.809366	-0.00819529	0.809366	-0.184355	4.40684e-08	-0.0251846	0.458414	0.0107891	0.750787
BAK1	blue	0.0793766	0.0192707	-0.0793766	0.0192707	-0.259201	8.29592e-15	-0.000121908	0.997137	0.0894558	0.00832625
C17orf75	blue	-0.026446	0.436209	0.026446	0.436209	0.366116	5.90331e-29	0.0585041	0.0847757	-0.0854281	0.0117589
HNRNPU	blue	0.0234204	0.490504	-0.0234204	0.490504	0.447283	5.69125e-44	0.0738498	0.0294924	-0.0403565	0.234663
CLECL1	blue	-0.061229	0.071223	0.061229	0.071223	0.364911	9.20331e-29	0.00957571	0.778035	-0.117757	0.000504307
LRPAP1	blue	0.0141819	0.676325	-0.0141819	0.676325	-0.190407	1.54293e-08	-0.123244	0.0002708	0.0303654	0.371294
FAM69A	blue	0.112593	0.000884521	-0.112593	0.000884521	0.555274	1.9209e-71	0.0407692	0.229907	0.0544001	0.109039
YTHDF3	blue	0.529273	6.72193e-64	-0.529273	6.72193e-64	0.630813	1.29011e-97	-0.0397151	0.24219	0.510149	9.3644e-59
BAZ2B	blue	0.389464	7.40889e-33	-0.389464	7.40889e-33	0.693384	1.56974e-125	-0.0188344	0.57926	0.366824	4.54432e-29
NMD3	blue	-0.126963	0.00017507	0.126963	0.00017507	0.680347	3.87314e-119	-0.0638553	0.0598919	-0.21255	2.46484e-10
MON2	blue	0.041775	0.218607	-0.041775	0.218607	0.652767	1.17905e-106	0.118922	0.000442877	-0.0206189	0.543845
GPR132	blue	0.0321758	0.343444	-0.0321758	0.343444	-0.356133	2.2081e-27	0.0475318	0.161526	0.0726416	0.0322631
NLRP1	blue	0.0294366	0.38611	-0.0294366	0.38611	-0.347007	5.41541e-26	-0.0300394	0.376454	0.0799635	0.0183929
KTN1	blue	-0.0169097	0.618629	0.0169097	0.618629	0.7119	3.19799e-135	0.0038657	0.909402	-0.108053	0.00142262
YEATS4	blue	-0.0285177	0.401116	0.0285177	0.401116	0.580036	2.83747e-79	-0.0254692	0.45335	-0.103195	0.00232039
PCF11	blue	0.0483803	0.154164	-0.0483803	0.154164	0.717539	2.50579e-138	0.0981277	0.00378537	-0.0132714	0.696034
SDK2	blue	-0.0250121	0.4615	0.0250121	0.4615	-0.183192	5.37048e-08	-0.0543017	0.109681	-0.0339655	0.317257
ECE1	blue	-0.00982748	0.772358	0.00982748	0.772358	-0.37524	1.92397e-30	-0.160296	2.04161e-06	0.0690052	0.0419832
C21orf2	blue	-0.0128233	0.705812	0.0128233	0.705812	-0.267815	9.69508e-16	0.0295965	0.383533	-0.0433589	0.201627
GPRIN3	blue	-0.0562523	0.0974838	0.0562523	0.0974838	0.577591	1.80353e-78	0.0998633	0.0032089	-0.130438	0.000115201
SLC30A9	blue	0.337623	1.30445e-24	-0.337623	1.30445e-24	0.692527	4.23229e-125	0.000767907	0.981966	0.267079	1.16845e-15
CFDP1	blue	-0.0356794	0.29344	0.0356794	0.29344	-0.257218	1.34454e-14	0.0209436	0.537518	-0.045834	0.177049
AGTPBP1	blue	0.173415	2.69337e-07	-0.173415	2.69337e-07	0.691798	9.8027e-125	0.0275998	0.416452	0.15583	3.9257e-06
LCOR	blue	0.0906091	0.0075243	-0.0906091	0.0075243	0.696233	5.66144e-127	-0.0384607	0.257398	0.0465525	0.17035
SOCS2	blue	0.0651258	0.0549711	-0.0651258	0.0549711	0.48669	7.09774e-53	0.0623721	0.0660921	0.0079452	0.815077
FGFR1OP2	blue	-0.0419455	0.216731	0.0419455	0.216731	0.689551	1.28869e-123	0.0240551	0.478822	-0.0883673	0.00915228
TNFSF13B	blue	-0.029923	0.378306	0.029923	0.378306	0.433332	4.34584e-41	-0.0973665	0.00406666	-0.0692314	0.0413133
ZNF271	blue	0.00744858	0.826446	-0.00744858	0.826446	0.592725	1.49056e-83	-0.0136881	0.686988	-0.0575468	0.0900042
PDCD10	blue	-0.0307929	0.364594	0.0307929	0.364594	0.681625	9.47101e-120	-0.0609045	0.0727375	-0.0920909	0.0065957
HDAC2	blue	0.0521493	0.124506	-0.0521493	0.124506	0.504567	2.58362e-57	0.101534	0.0027305	-0.000935009	0.978042
TPM2	blue	-0.101867	0.00264335	0.101867	0.00264335	-0.379472	3.78762e-31	0.032224	0.342721	-0.103855	0.00217371
PIK3CA	blue	0.493049	2.00591e-54	-0.493049	2.00591e-54	0.652052	2.38443e-106	-0.0291327	0.391034	0.448625	2.95513e-44
SLCO4C1	blue	0.000744996	0.982504	-0.000744996	0.982504	0.406141	7.65324e-36	0.113512	0.000801649	0.012264	0.718084
TSEN54	blue	0.0977036	0.00393981	-0.0977036	0.00393981	-0.339032	8.14532e-25	0.30209	8.54526e-20	0.0930137	0.00607075
PRKRIR	blue	0.390543	4.80476e-33	-0.390543	4.80476e-33	0.789024	1.2583e-185	0.0394659	0.245161	0.324312	9.89651e-23
CASD1	blue	0.452375	4.6666e-45	-0.452375	4.6666e-45	0.728736	1.00203e-144	0.0251671	0.458726	0.391126	3.80036e-33
DNAJB9	blue	0.301075	1.14822e-19	-0.301075	1.14822e-19	0.777749	5.21645e-177	0.0810082	0.0169167	0.249494	8.48746e-14
STRN3	blue	-0.0123965	0.715171	0.0123965	0.715171	0.688842	2.89198e-123	0.0446692	0.188323	-0.0629266	0.063715
SLC4A2	blue	0.0546584	0.107365	-0.0546584	0.107365	-0.475959	2.46711e-50	0.0287864	0.396693	0.0764487	0.0242169
CLEC4D	blue	0.120271	0.000380489	-0.120271	0.000380489	0.48025	2.43738e-51	-0.103072	0.00234876	0.106557	0.00165734
EMILIN2	blue	0.0464583	0.171218	-0.0464583	0.171218	-0.321378	2.49769e-22	-0.0894517	0.00832926	0.0893465	0.00840604
CARD11	blue	0.00319225	0.925134	-0.00319225	0.925134	-0.39783	2.47238e-34	0.213875	1.89581e-10	-0.0172381	0.611828
GPR27	blue	0.0235978	0.487225	-0.0235978	0.487225	0.217806	8.61273e-11	-0.0603598	0.0753391	0.0570211	0.0929843
CYP4F22	blue	-0.0642799	0.0582082	0.0642799	0.0582082	-0.210224	3.89205e-10	0.0357873	0.29198	-0.0432139	0.20314
SUPT5H	blue	0.122155	0.000306977	-0.122155	0.000306977	-0.60639	2.22163e-88	-0.0116817	0.730937	0.176608	1.60631e-07
TXNL1	blue	0.405685	9.2843e-36	-0.405685	9.2843e-36	0.622436	2.34967e-94	0.00305314	0.928388	0.354541	3.8873e-27
GSPT2	blue	0.0804316	0.0177181	-0.0804316	0.0177181	0.365741	6.77916e-29	0.108424	0.00136924	0.0278847	0.411655
RORA	blue	0.0405085	0.232903	-0.0405085	0.232903	0.237441	1.33089e-12	0.359861	5.79715e-28	-0.0328277	0.33375
VAMP2	blue	0.0303183	0.372036	-0.0303183	0.372036	-0.497149	1.93303e-55	-0.00138977	0.967368	0.0515581	0.128839
UBA3	blue	-0.0736725	0.0298856	0.0736725	0.0298856	0.732651	4.86611e-147	0.0184984	0.586047	-0.138705	4.08155e-05
GMFB	blue	0.469052	9.5605e-49	-0.469052	9.5605e-49	0.80281	6.52468e-197	-0.0363039	0.285066	0.410658	1.11061e-36
SNX16	blue	0.559087	1.31992e-72	-0.559087	1.31992e-72	0.70434	3.5687e-131	-0.0404343	0.233761	0.515212	4.37964e-60
TBC1D23	blue	0.0805569	0.0175412	-0.0805569	0.0175412	0.749411	2.00104e-157	0.0252459	0.45732	0.0296759	0.382258
CDC20	blue	-0.0309554	0.362067	0.0309554	0.362067	-0.194911	6.90881e-09	-0.0291524	0.390713	-0.011942	0.725183
UBE2Q2	blue	0.134052	7.37354e-05	-0.134052	7.37354e-05	0.772942	1.73318e-173	0.152915	5.95684e-06	0.0705479	0.037593
TBC1D4	blue	0.210517	3.67548e-10	-0.210517	3.67548e-10	0.679046	1.6132e-118	-0.000634785	0.985092	0.139144	3.85596e-05
INSL3	blue	0.000518721	0.987817	-0.000518721	0.987817	-0.294496	7.56561e-19	-0.101104	0.00284705	0.036265	0.285584
TM9SF3	blue	0.319898	3.96888e-22	-0.319898	3.96888e-22	0.778844	7.99518e-178	-0.00187052	0.95609	0.261717	4.46701e-15
ABCB7	blue	0.036656	0.280418	-0.036656	0.280418	0.356403	2.0053e-27	0.0685785	0.0432712	-0.0315119	0.353498
MBOAT2	blue	0.0486274	0.152069	-0.0486274	0.152069	0.192044	1.15486e-08	-0.0867424	0.0105214	0.0805524	0.0175475
LIMK2	blue	0.0226875	0.504182	-0.0226875	0.504182	-0.237087	1.43971e-12	-0.116238	0.00059632	0.0925497	0.00632981
ANKRD46	blue	0.216732	1.07022e-10	-0.216732	1.07022e-10	0.743025	2.25985e-153	0.0252065	0.458024	0.146374	1.47704e-05
SNX29	blue	0.0683134	0.0440882	-0.0683134	0.0440882	-0.244657	2.60785e-13	0.0216587	0.523715	0.0644738	0.0574528
CACNA1D	blue	0.0344084	0.310985	-0.0344084	0.310985	-0.344922	1.10824e-25	-0.0157585	0.642718	0.0780888	0.0213257
SMARCC2	blue	-0.0552173	0.103814	0.0552173	0.103814	-0.547655	3.65733e-69	0.113909	0.00076813	-0.0244853	0.470991
CFP	blue	0.0456688	0.178617	-0.0456688	0.178617	-0.489379	1.58525e-53	-0.132351	9.10996e-05	0.123015	0.000278064
CD69	blue	-0.169922	4.69014e-07	0.169922	4.69014e-07	0.68677	3.02763e-122	0.0670483	0.0481682	-0.255527	2.02346e-14
ADPRH	blue	-0.0496277	0.143807	0.0496277	0.143807	-0.202666	1.65574e-09	-0.0486097	0.152218	-0.0219654	0.517851
IER3IP1	blue	0.0437191	0.197904	-0.0437191	0.197904	0.61472	1.93952e-91	0.0666601	0.0494816	-0.0304755	0.369561
CITED4	blue	-0.127407	0.000166053	0.127407	0.000166053	-0.278254	6.46848e-17	-0.253834	3.03764e-14	-0.0878592	0.00956229
PGRMC2	blue	0.150158	8.77493e-06	-0.150158	8.77493e-06	0.665281	3.74088e-112	0.0894505	0.0083301	0.0997015	0.00325905
EPHX1	blue	0.0598421	0.077881	-0.0598421	0.077881	-0.397485	2.84998e-34	-0.0372607	0.272554	0.119547	0.000412914
CHMP1B	blue	0.175211	2.01635e-07	-0.175211	2.01635e-07	0.427412	6.63044e-40	-0.0295389	0.38446	0.177517	1.38406e-07
FZD2	blue	0.00900619	0.790921	-0.00900619	0.790921	-0.312338	4.06087e-21	-0.0111859	0.741943	0.0397964	0.241226
TCFL5	blue	0.395462	6.53917e-34	-0.395462	6.53917e-34	0.578392	9.85992e-79	-0.0113284	0.738775	0.363942	1.31368e-28
ZDHHC17	blue	0.334367	3.83588e-24	-0.334367	3.83588e-24	0.656009	4.70088e-108	0.0544687	0.108592	0.309592	9.29514e-21
CD164	blue	0.499837	4.09795e-56	-0.499837	4.09795e-56	0.714013	2.23873e-136	-0.0243722	0.473043	0.471111	3.2414e-49
NPAT	blue	0.0578916	0.0880921	-0.0578916	0.0880921	0.233857	2.93221e-12	0.0683863	0.0438623	0.0329494	0.33196
C3AR1	blue	-0.00361845	0.915174	0.00361845	0.915174	-0.17456	2.24029e-07	0.00625662	0.853877	0.0144333	0.670919
ANAPC10	blue	-0.0949954	0.00506831	0.0949954	0.00506831	0.468659	1.17407e-48	0.0313361	0.35619	-0.16886	5.53914e-07
GPBP1	blue	0.0234182	0.490546	-0.0234182	0.490546	0.757015	2.05192e-162	-0.000529852	0.987556	-0.0454249	0.180951
PGM2	blue	0.54561	1.46197e-68	-0.54561	1.46197e-68	0.663633	2.05159e-111	-0.0572893	0.0914541	0.520978	1.25579e-61
CAPN12	blue	-0.000386623	0.99092	0.000386623	0.99092	-0.146414	1.46905e-05	0.15714	3.24632e-06	-0.0143064	0.673645
PDIK1L	blue	0.0067537	0.842414	-0.0067537	0.842414	0.721819	9.77781e-141	0.067872	0.0454774	-0.0680972	0.0447642
GLOD5	blue	0.0906521	0.00749575	-0.0906521	0.00749575	-0.327225	3.90738e-23	-0.0550103	0.105118	0.116914	0.000553621
ITGAV	blue	0.00553312	0.870616	-0.00553312	0.870616	0.735664	7.56483e-149	0.0543492	0.109371	-0.0479717	0.157677
TTC32	blue	0.179899	9.33686e-08	-0.179899	9.33686e-08	0.562353	1.29457e-73	-0.0955737	0.00480537	0.144126	2.00044e-05
SUV39H1	blue	0.0622852	0.0664711	-0.0622852	0.0664711	-0.26137	4.86711e-15	0.0731269	0.0311246	0.0608768	0.0728679
PSMA2	blue	-0.0590345	0.0819856	0.0590345	0.0819856	0.499277	5.66609e-56	-0.0119971	0.723965	-0.137237	4.92864e-05
PIGB	blue	0.00963101	0.776787	-0.00963101	0.776787	0.462278	3.18689e-47	0.0474688	0.162083	-0.00337111	0.920953
EIF1AX	blue	0.118056	0.000487832	-0.118056	0.000487832	0.592272	2.13481e-83	-0.00213511	0.949886	0.0603385	0.0754424
IGF1R	blue	0.00155361	0.963523	-0.00155361	0.963523	-0.207369	6.76903e-10	-0.0741013	0.0289419	0.0645937	0.0569893
SOS1	blue	0.301356	1.05803e-19	-0.301356	1.05803e-19	0.486283	8.89361e-53	0.0671003	0.0479942	0.271062	4.23001e-16
C12orf29	blue	0.399538	1.22038e-34	-0.399538	1.22038e-34	0.747671	2.61768e-156	0.0093636	0.782827	0.330716	1.26624e-23
SSPN	blue	0.0622685	0.0665445	-0.0622685	0.0665445	0.272324	3.05438e-16	-0.0636853	0.0605772	0.0482448	0.155322
GIT2	blue	0.0459621	0.175841	-0.0459621	0.175841	-0.26081	5.58844e-15	0.0491506	0.147704	0.100162	0.00311827
POLB	blue	0.0189036	0.577867	-0.0189036	0.577867	0.408119	3.29811e-36	-0.0483335	0.154563	-0.0082725	0.807605
CAMKK2	blue	-0.0847469	0.0124496	0.0847469	0.0124496	-0.378708	5.0871e-31	-0.136563	5.37098e-05	-0.00983854	0.772108
ARRDC3	blue	-0.0957038	0.00474792	0.0957038	0.00474792	0.608619	3.44505e-89	0.0110068	0.745931	-0.123656	0.000258176
CLASP2	blue	0.281095	3.03311e-17	-0.281095	3.03311e-17	0.67444	2.37751e-116	0.112511	0.000892274	0.236272	1.72459e-12
ZBTB11	blue	0.507845	3.71102e-58	-0.507845	3.71102e-58	0.723185	1.63015e-141	0.0677553	0.0458506	0.46389	1.39321e-47
SNX13	blue	0.523564	2.49822e-62	-0.523564	2.49822e-62	0.682914	2.26957e-120	-0.0419409	0.216782	0.504592	2.54604e-57
PIP5K1C	blue	0.0942893	0.00540691	-0.0942893	0.00540691	-0.616093	5.95213e-92	-0.0284764	0.401799	0.160416	2.00537e-06
ABCA7	blue	0.0414136	0.22262	-0.0414136	0.22262	-0.379702	3.46487e-31	-0.0500278	0.1406	0.0844146	0.0127993
CLIP4	blue	0.24538	2.20843e-13	-0.24538	2.20843e-13	0.533169	5.4804e-65	0.193396	9.07236e-09	0.201388	2.10362e-09
MAD1L1	blue	0.000840939	0.980251	-0.000840939	0.980251	-0.361347	3.38371e-28	0.0175179	0.606061	-0.00397554	0.906839
TMEM41B	blue	0.205023	1.06038e-09	-0.205023	1.06038e-09	0.749792	1.13714e-157	0.0216002	0.524838	0.14859	1.0906e-05
KRCC1	blue	-0.232249	4.16223e-12	0.232249	4.16223e-12	0.603298	2.87991e-87	-0.0689095	0.0422692	-0.298503	2.41293e-19
TNFRSF21	blue	-0.0431653	0.20365	0.0431653	0.20365	-0.188231	2.2592e-08	0.0300932	0.375598	-0.0304006	0.370739
ARID1A	blue	0.0153463	0.651437	-0.0153463	0.651437	-0.392787	1.94259e-33	0.103428	0.00226755	0.0548713	0.106002
PVRIG	blue	-0.0182043	0.592018	0.0182043	0.592018	-0.2537	3.13658e-14	0.190561	1.50166e-08	-0.0678676	0.0454913
CD320	blue	-0.0791217	0.0196632	0.0791217	0.0196632	-0.273156	2.46219e-16	0.251301	5.54651e-14	-0.105004	0.00193835
HMGCS1	blue	0.385942	3.01128e-32	-0.385942	3.01128e-32	0.756868	2.57395e-162	0.0234125	0.490652	0.320306	3.49415e-22
SLC36A4	blue	-0.00664561	0.844904	0.00664561	0.844904	0.620975	8.50432e-94	-0.083587	0.0137085	-0.0655788	0.0533001
OGFRL1	blue	0.46267	2.60751e-47	-0.46267	2.60751e-47	0.594966	2.49882e-84	-0.00310331	0.927214	0.464439	1.0499e-47
RARA	blue	0.0668025	0.0489964	-0.0668025	0.0489964	-0.513813	1.0258e-59	-0.0708536	0.0367709	0.153933	5.15362e-06
CCDC126	blue	0.402615	3.38384e-35	-0.402615	3.38384e-35	0.738558	1.31249e-150	-0.0977316	0.00392947	0.376143	1.36318e-30
MYB	blue	-0.0142177	0.675554	0.0142177	0.675554	0.409273	2.01338e-36	-0.0883038	0.00920265	-0.0644709	0.0574639
LEMD3	blue	0.381193	1.94171e-31	-0.381193	1.94171e-31	0.78709	4.12268e-184	0.0363617	0.2843	0.329674	1.77522e-23
IRAK4	blue	0.114293	0.000736982	-0.114293	0.000736982	0.456814	5.0944e-46	-0.017905	0.598123	0.0885967	0.00897233
NLRC5	blue	0.0280581	0.408752	-0.0280581	0.408752	-0.310988	6.10757e-21	0.0901459	0.00783769	0.0322142	0.342866
RBM26	blue	0.0669984	0.0483351	-0.0669984	0.0483351	0.672261	2.44491e-115	0.0411708	0.225347	0.0217218	0.522507
PLOD1	blue	-0.0325547	0.337787	0.0325547	0.337787	-0.32177	2.20836e-22	0.0412314	0.224665	0.0149717	0.659403
TCF7L2	blue	-0.0194174	0.567572	0.0194174	0.567572	-0.13837	4.26151e-05	0.0702917	0.0382938	0.0203375	0.549357
SSH1	blue	-0.117691	0.000508061	0.117691	0.000508061	-0.481295	1.38006e-51	0.0972545	0.00410958	-0.0624502	0.0657531
RAP2C	blue	0.54776	3.40476e-69	-0.54776	3.40476e-69	0.728382	1.61406e-144	-0.00462439	0.891722	0.511922	3.2223e-59
IKBKE	blue	0.0861638	0.0110512	-0.0861638	0.0110512	-0.277935	7.03756e-17	-0.0263752	0.437438	0.0924242	0.00640158
GLO1	blue	0.16635	8.17518e-07	-0.16635	8.17518e-07	0.525807	6.0844e-63	0.0784325	0.0207595	0.0986991	0.00358597
SLC25A22	blue	0.0320273	0.345676	-0.0320273	0.345676	-0.382227	1.29769e-31	0.120294	0.0003795	0.045666	0.178643
OS9	blue	0.0483478	0.154442	-0.0483478	0.154442	-0.49666	2.55834e-55	-0.159141	2.42169e-06	0.132356	9.10408e-05
CXCL10	blue	0.00740229	0.827507	-0.00740229	0.827507	0.24018	7.21436e-13	-0.0469759	0.166492	-0.0188905	0.578131
SLU7	blue	-0.116954	0.000551166	0.116954	0.000551166	0.635208	2.28883e-99	-0.0382213	0.260374	-0.183049	5.50164e-08
PSENEN	blue	0.0240448	0.479012	-0.0240448	0.479012	-0.415861	1.15802e-37	-0.11746	0.000521192	0.103125	0.00233655
COL18A1	blue	0.0200043	0.55592	-0.0200043	0.55592	-0.205039	1.05725e-09	-0.081025	0.0168938	0.0707625	0.0370143
KIAA1683	blue	-0.0871302	0.0101791	0.0871302	0.0101791	-0.33404	4.27219e-24	-0.0946172	0.0052472	-0.0616056	0.069498
UBAP2L	blue	0.0391002	0.249565	-0.0391002	0.249565	-0.512615	2.12077e-59	-5.2707e-05	0.998762	0.066066	0.0515503
RASGRP3	blue	-0.00571186	0.866475	0.00571186	0.866475	0.285544	9.10459e-18	-0.0178481	0.599288	-0.0713149	0.0355595
PPM1A	blue	-0.0165475	0.626165	0.0165475	0.626165	0.63802	1.67636e-100	0.00822	0.808803	-0.0307108	0.365874
HMGB1	blue	0.101864	0.00264418	-0.101864	0.00264418	0.771226	2.98448e-172	0.0229509	0.499244	0.0264645	0.435888
PPP1R12A	blue	0.545281	1.82545e-68	-0.545281	1.82545e-68	0.770076	1.98306e-171	-0.000882968	0.979264	0.51012	9.5292e-59
MRPL38	blue	0.0394079	0.245854	-0.0394079	0.245854	-0.427763	5.64954e-40	-0.0230671	0.497074	0.0340654	0.315835
LMNA	blue	-0.0334383	0.324832	0.0334383	0.324832	-0.49365	1.42644e-54	-0.108575	0.00134816	0.0213719	0.529229
ATG3	blue	0.227145	1.24343e-11	-0.227145	1.24343e-11	0.740345	1.04566e-151	-0.0677824	0.0457637	0.186461	3.07045e-08
ATP9A	blue	0.00527222	0.876667	-0.00527222	0.876667	-0.29723	3.47643e-19	0.0352848	0.298814	0.0528107	0.119793
BCORL1	blue	-0.0129996	0.70196	0.0129996	0.70196	-0.411988	6.25474e-37	-0.0479376	0.157973	0.0645028	0.0573404
ZNF439	blue	0.00898978	0.791293	-0.00898978	0.791293	0.557188	5.03104e-72	0.0813455	0.0164627	-0.0555086	0.102
GNAI3	blue	0.439375	2.54549e-42	-0.439375	2.54549e-42	0.701664	9.01598e-130	-0.0880559	0.00940163	0.407449	4.38905e-36
ARGLU1	blue	0.00724285	0.831166	-0.00724285	0.831166	0.665078	4.61832e-112	0.0798284	0.0185919	-0.0628521	0.0640303
RAB1B	blue	0.0590242	0.0820392	-0.0590242	0.0820392	-0.539908	6.62668e-67	-0.0926416	0.00627771	0.136662	5.30421e-05
SSFA2	blue	0.270844	4.47302e-16	-0.270844	4.47302e-16	0.520528	1.66192e-61	-0.0400316	0.238455	0.269241	6.74534e-16
TXNDC9	blue	0.328592	2.51795e-23	-0.328592	2.51795e-23	0.776397	5.20724e-176	-0.0475725	0.161168	0.258711	9.35103e-15
EPHB6	blue	0.0672842	0.0473842	-0.0672842	0.0473842	-0.454093	1.98841e-45	-0.103911	0.00216167	0.0944811	0.00531297
APOBEC3C	blue	-0.132064	9.43858e-05	0.132064	9.43858e-05	-0.473403	9.64176e-50	0.0666633	0.0494707	-0.119464	0.000416747
ZNF721	blue	0.156495	3.56523e-06	-0.156495	3.56523e-06	0.686355	4.83214e-122	0.0453431	0.181737	0.0964828	0.00441683
SLC26A8	blue	-0.00604129	0.858852	0.00604129	0.858852	-0.161283	1.76252e-06	-0.126551	0.00018383	0.0564747	0.096165
OSTM1	blue	0.359894	5.72703e-28	-0.359894	5.72703e-28	0.729421	3.97269e-145	-0.0195707	0.564517	0.340424	5.10297e-25
LMF2	blue	0.0520369	0.125321	-0.0520369	0.125321	-0.482839	5.93549e-52	-0.00528559	0.876356	0.0670829	0.0480523
TCN2	blue	-0.0161641	0.634185	0.0161641	0.634185	-0.286488	7.03298e-18	-0.117905	0.000496119	0.0251032	0.459868
MYBPC3	blue	-0.0174514	0.60743	0.0174514	0.60743	-0.266188	1.46323e-15	-0.185065	3.90295e-08	0.0331638	0.328822
ZSCAN18	blue	0.00997119	0.769122	-0.00997119	0.769122	-0.150743	8.08783e-06	-0.0150864	0.656961	-0.0098604	0.771616
FOXRED1	blue	0.0651938	0.0547176	-0.0651938	0.0547176	-0.289283	3.2554e-18	-0.00726691	0.830614	0.0672171	0.0476061
FAM105A	blue	0.0190608	0.574708	-0.0190608	0.574708	0.567813	2.51907e-75	0.0015324	0.964021	-0.0255852	0.451295
JAK2	blue	0.184777	4.10048e-08	-0.184777	4.10048e-08	0.619225	3.93029e-93	0.00124367	0.970797	0.164785	1.03901e-06
CHUK	blue	0.564453	2.87088e-74	-0.564453	2.87088e-74	0.747847	2.01937e-156	-0.0185645	0.58471	0.530945	2.3011e-64
PCMTD1	blue	0.606219	2.56141e-88	-0.606219	2.56141e-88	0.71035	2.21472e-134	0.00591174	0.861849	0.573141	5.01738e-77
EBPL	blue	0.0851721	0.0120144	-0.0851721	0.0120144	0.183467	5.12515e-08	-0.0134622	0.691887	0.0706877	0.037215
SPAST	blue	0.583255	2.42691e-80	-0.583255	2.42691e-80	0.706734	1.92594e-132	-0.0682098	0.0444109	0.550687	4.60061e-70
C1GALT1	blue	-0.112772	0.000867742	0.112772	0.000867742	0.530448	3.16771e-64	-0.0699318	0.0392972	-0.162255	1.52387e-06
STXBP5	blue	0.619034	4.6438e-93	-0.619034	4.6438e-93	0.673135	9.63123e-116	-0.0395574	0.244067	0.605705	3.92973e-88
ARL6IP6	blue	0.258555	9.71404e-15	-0.258555	9.71404e-15	0.681623	9.48635e-120	0.0253683	0.455142	0.233871	2.92338e-12
GBGT1	blue	-0.0675958	0.046365	0.0675958	0.046365	-0.328989	2.21542e-23	-0.0644899	0.0573903	-0.013083	0.700139
STAB1	blue	-0.128259	0.000149955	0.128259	0.000149955	-0.322977	1.50982e-22	-0.111523	0.000990874	-0.0964334	0.0044372
C4orf33	blue	0.261211	5.06187e-15	-0.261211	5.06187e-15	0.624029	5.73478e-95	-0.0345981	0.308323	0.223305	2.78487e-11
STK17B	blue	0.0205138	0.5459	-0.0205138	0.5459	0.709944	3.66942e-134	-0.0580418	0.0872692	-0.0206503	0.543231
SLC29A1	blue	0.0535178	0.114911	-0.0535178	0.114911	-0.305177	3.457e-20	-0.021664	0.523613	0.0795088	0.0190699
TMEM106B	blue	0.578426	9.60908e-79	-0.578426	9.60908e-79	0.726546	1.892e-143	0.0376202	0.26795	0.52306	3.4269e-62
GPR114	blue	-0.000994228	0.976652	0.000994228	0.976652	-0.257823	1.16086e-14	0.315971	1.33923e-21	-0.0104611	0.758124
LGALS3BP	blue	-0.260754	5.66515e-15	0.260754	5.66515e-15	-0.482375	7.64957e-52	-0.156204	3.71859e-06	-0.238999	9.40401e-13
CD9	blue	-0.048478	0.153333	0.048478	0.153333	-0.250467	6.75302e-14	0.00966358	0.776052	-0.0160466	0.636653
PLEKHG3	blue	0.00684856	0.84023	-0.00684856	0.84023	-0.340886	4.36709e-25	0.0747216	0.027622	0.0549334	0.105606
PDE4D	blue	0.0197495	0.560964	-0.0197495	0.560964	0.499831	4.11224e-56	0.164052	1.16159e-06	-0.0234338	0.490256
RAB11FIP2	blue	0.620578	1.20419e-93	-0.620578	1.20419e-93	0.716304	1.21827e-137	0.0388253	0.252911	0.584934	6.65797e-81
PDZD8	blue	0.516983	1.48206e-60	-0.516983	1.48206e-60	0.640604	1.48089e-101	-0.0306628	0.366625	0.512897	1.78812e-59
GPR84	blue	-0.0518531	0.126663	0.0518531	0.126663	-0.201148	2.20003e-09	-0.179307	1.03008e-07	-0.00631172	0.852605
ADAM10	blue	0.271123	4.16378e-16	-0.271123	4.16378e-16	0.706738	1.91739e-132	-0.0211973	0.5326	0.254235	2.75931e-14
TPCN2	blue	-0.0139412	0.681513	0.0139412	0.681513	-0.245647	2.07657e-13	-0.0614214	0.0703375	0.035764	0.292296
RPS6KA4	blue	0.020531	0.545564	-0.020531	0.545564	-0.3178	7.61726e-22	0.0138187	0.684161	0.0322609	0.342168
MRPS28	blue	-0.0288814	0.395135	0.0288814	0.395135	0.433053	4.94938e-41	-0.011098	0.743899	-0.10279	0.00241491
HSPH1	blue	0.042618	0.209446	-0.042618	0.209446	0.524439	1.44169e-62	0.085392	0.0117946	-0.0334721	0.324342
SETDB2	blue	0.0647807	0.0562732	-0.0647807	0.0562732	0.638104	1.54912e-100	0.130676	0.000111911	-0.0155871	0.646339
PHC1	blue	0.0372746	0.272374	-0.0372746	0.272374	-0.126614	0.000182459	0.0246188	0.468577	0.00146645	0.965568
NOC3L	blue	0.217491	9.18049e-11	-0.217491	9.18049e-11	0.726484	2.05591e-143	-0.023754	0.484346	0.134346	7.10646e-05
SLC25A29	blue	-0.0536913	0.113737	0.0536913	0.113737	-0.309657	9.11687e-21	0.0157901	0.642052	-0.0273651	0.420427
NMI	blue	0.0284292	0.40258	-0.0284292	0.40258	0.498133	1.09708e-55	-0.103576	0.00223464	-0.00335554	0.921317
CASP3	blue	0.0435455	0.199692	-0.0435455	0.199692	0.712916	8.924e-136	0.0373387	0.27155	-0.0261148	0.441979
USP36	blue	0.0100006	0.76846	-0.0100006	0.76846	-0.401448	5.51429e-35	0.0885129	0.00903772	0.00463023	0.891586
NSUN7	blue	0.032908	0.332568	-0.032908	0.332568	0.163987	1.17311e-06	-0.0487428	0.151098	0.0778392	0.0217454
ABCD1	blue	-0.0304068	0.370641	0.0304068	0.370641	-0.535979	8.80179e-66	-0.124322	0.000238912	0.0345642	0.308798
SPOPL	blue	0.601179	1.64055e-86	-0.601179	1.64055e-86	0.747382	4.00118e-156	-0.0531669	0.117314	0.580139	2.62326e-79
RRAS	blue	0.0413345	0.223506	-0.0413345	0.223506	-0.292971	1.16287e-18	0.00925797	0.785217	0.0404157	0.233976
RNF138	blue	0.429641	2.39219e-40	-0.429641	2.39219e-40	0.789426	6.062e-186	-0.026266	0.43934	0.379734	3.42221e-31
PPP2R3C	blue	0.0327118	0.33546	-0.0327118	0.33546	0.29166	1.6799e-18	0.0438007	0.197067	0.00514222	0.879684
ACACB	blue	0.0511625	0.131804	-0.0511625	0.131804	-0.263943	2.56957e-15	0.00148685	0.96509	0.0387624	0.253681
NECAB2	blue	0.0413946	0.222833	-0.0413946	0.222833	-0.268801	7.54616e-16	-0.0864257	0.0108085	0.10439	0.0020611
GPR180	blue	0.0315384	0.353092	-0.0315384	0.353092	0.245861	1.97678e-13	0.0505659	0.136374	-0.0111352	0.74307
VENTX	blue	-0.0268466	0.429289	0.0268466	0.429289	-0.278253	6.47033e-17	-0.0351182	0.301102	-0.0085905	0.800363
TMEM14B	blue	0.0715034	0.0350745	-0.0715034	0.0350745	0.528418	1.16022e-63	-0.00743504	0.826756	-0.00245398	0.942414
ZRANB2	blue	0.0587824	0.0833024	-0.0587824	0.0833024	0.757225	1.48552e-162	0.0739606	0.0292488	-0.0339986	0.316786
CHD9	blue	0.0620714	0.0674114	-0.0620714	0.0674114	0.673285	8.19711e-116	0.129805	0.000124425	-0.0162058	0.633312
MT1E	blue	-0.013508	0.690891	0.013508	0.690891	-0.115033	0.000680207	0.0338243	0.319274	-0.0168467	0.619935
STEAP4	blue	-0.0749322	0.027186	0.0749322	0.027186	0.280988	3.12115e-17	-0.0716112	0.0347995	-0.0579473	0.087786
LRRK2	blue	0.247503	1.35121e-13	-0.247503	1.35121e-13	0.741129	3.42084e-152	-0.0446707	0.188308	0.234495	2.55013e-12
GIMAP1	blue	0.0382614	0.259874	-0.0382614	0.259874	0.168742	5.64227e-07	0.0229903	0.498508	-0.0361282	0.287405
MGC24103	blue	-0.0372849	0.272243	0.0372849	0.272243	-0.163317	1.29843e-06	0.389842	6.36619e-33	-0.0418213	0.218096
SPG21	blue	0.0731673	0.0310312	-0.0731673	0.0310312	-0.344441	1.30638e-25	0.00378078	0.911384	0.126921	0.000175941
FBXO30	blue	0.583123	2.68551e-80	-0.583123	2.68551e-80	0.745594	5.47867e-155	-0.0281712	0.406866	0.54227	1.37766e-67
STYXL1	blue	0.0989914	0.0034877	-0.0989914	0.0034877	-0.404546	1.50248e-35	-0.0592456	0.0808961	0.148486	1.10625e-05
ANKRD49	blue	-0.00273815	0.935759	0.00273815	0.935759	0.734494	3.83508e-148	0.0700841	0.0388698	-0.0855613	0.0116278
RAVER1	blue	0.0418555	0.217719	-0.0418555	0.217719	-0.64233	2.89046e-102	-0.0186504	0.582973	0.100417	0.00304252
VARS2	blue	0.0661864	0.0511253	-0.0661864	0.0511253	-0.274976	1.53282e-16	-0.0132886	0.69566	0.0651017	0.055061
CBLN3	blue	0.0267217	0.431439	-0.0267217	0.431439	-0.0999576	0.00318001	-0.0532909	0.11646	0.0169956	0.616846
CCDC146	blue	0.045403	0.18116	-0.045403	0.18116	0.351638	1.08174e-26	0.0918267	0.00675329	0.0192363	0.571189
OSBPL5	blue	0.0628682	0.0639618	-0.0628682	0.0639618	-0.335887	2.32217e-24	0.366395	5.32567e-29	0.0750433	0.0269582
SENP7	blue	0.559779	8.08908e-73	-0.559779	8.08908e-73	0.781336	1.07459e-179	-0.019109	0.573741	0.515434	3.82447e-60
STXBP3	blue	0.0138781	0.682877	-0.0138781	0.682877	0.527988	1.52602e-63	0.0636177	0.0608514	-0.00355147	0.916739
ENPP4	blue	-0.00112251	0.973641	0.00112251	0.973641	0.685588	1.14558e-121	0.27278	2.71446e-16	-0.0643343	0.0579956
MT1X	blue	0.0630799	0.0630705	-0.0630799	0.0630705	-0.241837	4.96155e-13	0.00677826	0.841848	0.0456022	0.179252
MYL9	blue	-0.156886	3.36879e-06	0.156886	3.36879e-06	-0.396791	3.7914e-34	-0.0490543	0.1485	-0.0958817	0.00467039
CCDC88B	blue	0.113683	0.000787083	-0.113683	0.000787083	-0.546379	8.69122e-69	-0.0752014	0.0266371	0.183631	4.98462e-08
KLHL2	blue	0.572048	1.12748e-76	-0.572048	1.12748e-76	0.692915	2.69947e-125	-0.0435981	0.199149	0.556352	9.04336e-72
RABEP1	blue	0.0021718	0.949026	-0.0021718	0.949026	0.568445	1.58874e-75	0.0532258	0.116908	-0.0745836	0.027911
TMEM123	blue	0.130115	0.000119825	-0.130115	0.000119825	0.648433	8.22437e-105	0.00645834	0.849221	0.0838074	0.013461
DYRK2	blue	0.0804672	0.0176677	-0.0804672	0.0176677	0.569085	9.95434e-76	0.179258	1.03852e-07	-0.0139055	0.682284
CGRRF1	blue	0.101627	0.00270595	-0.101627	0.00270595	0.73331	1.96606e-147	-0.0052473	0.877245	0.0455947	0.179324
CUL5	blue	0.00849178	0.802609	-0.00849178	0.802609	0.653889	3.8813e-107	0.0907508	0.00743065	-0.0711059	0.0361041
COMMD2	blue	0.320434	3.35621e-22	-0.320434	3.35621e-22	0.72881	9.05909e-145	-0.0169372	0.618058	0.270357	5.06982e-16
UBA6	blue	0.457109	4.39181e-46	-0.457109	4.39181e-46	0.740428	9.28868e-152	-0.00593901	0.861218	0.397582	2.73868e-34
PDE3B	blue	-0.0466393	0.169554	0.0466393	0.169554	0.63072	1.40391e-97	0.00584849	0.863312	-0.0940617	0.00552035
SESN1	blue	0.334397	3.79769e-24	-0.334397	3.79769e-24	0.592094	2.4579e-83	0.0783516	0.0208916	0.279811	4.2754e-17
UNC13D	blue	-0.00204517	0.951994	0.00204517	0.951994	-0.503934	3.75014e-57	-0.138964	3.94706e-05	0.0763786	0.0243476
OXER1	blue	-0.0361662	0.286899	0.0361662	0.286899	-0.362088	2.58491e-28	-0.163785	1.20966e-06	0.0338321	0.319163
CRYZ	blue	-0.0257734	0.447971	0.0257734	0.447971	0.639057	6.34982e-101	0.161948	1.59566e-06	-0.106627	0.00164574
HPGD	blue	-0.00107363	0.974788	0.00107363	0.974788	0.569309	8.45068e-76	0.0733152	0.0306921	-0.044219	0.192819
CORO7	blue	0.0740596	0.0290324	-0.0740596	0.0290324	-0.484319	2.63289e-52	-0.117831	0.000500218	0.135669	6.01632e-05
BZRAP1	blue	0.0130364	0.701157	-0.0130364	0.701157	-0.242429	4.33803e-13	0.443685	3.24758e-43	0.00689818	0.839088
ASF1A	blue	0.0573894	0.0908883	-0.0573894	0.0908883	0.654799	1.57168e-107	0.138207	4.35234e-05	-0.0178809	0.598617
GNB2	blue	-0.0386595	0.254944	0.0386595	0.254944	-0.53371	3.85831e-65	-0.0423425	0.212409	0.0453416	0.181752
CRIPAK	blue	-0.0550687	0.104749	0.0550687	0.104749	-0.427191	7.33269e-40	0.00726266	0.830712	-0.0214865	0.527022
SLC25A46	blue	0.472725	1.38179e-49	-0.472725	1.38179e-49	0.816588	4.02232e-209	0.0459515	0.17594	0.415717	1.23342e-37
C11orf80	blue	-0.0111999	0.74163	0.0111999	0.74163	0.14112	2.98009e-05	0.0985134	0.00364971	-0.0605748	0.0743033
MRPL3	blue	-0.285545	9.1022e-18	0.285545	9.1022e-18	0.487399	4.78579e-53	-0.0276378	0.41581	-0.365973	6.22382e-29
PTPRC	blue	0.0514327	0.129773	-0.0514327	0.129773	0.479447	3.76695e-51	0.0528483	0.11953	0.0368758	0.277542
IER3	blue	-0.0456913	0.178403	0.0456913	0.178403	-0.238488	1.05405e-12	-0.0177599	0.601094	-0.018354	0.588976
ZFHX3	blue	0.0079696	0.814519	-0.0079696	0.814519	-0.380563	2.48047e-31	-0.0270484	0.425828	0.0435852	0.199282
TSPAN14	blue	0.0491094	0.148044	-0.0491094	0.148044	-0.525075	9.66102e-63	0.0346668	0.307363	0.0963554	0.00446953
SH3YL1	blue	0.3086	1.2511e-20	-0.3086	1.2511e-20	0.539482	8.7903e-67	-0.0272203	0.422891	0.247779	1.26722e-13
LOC284837	blue	0.0303872	0.370951	-0.0303872	0.370951	-0.307506	1.73382e-20	-0.0202386	0.5513	0.0471681	0.164763
MYO1F	blue	0.0421029	0.21501	-0.0421029	0.21501	-0.478765	5.44962e-51	-0.0694224	0.040755	0.119052	0.000436472
SCOC	blue	0.332511	7.05293e-24	-0.332511	7.05293e-24	0.696843	2.76481e-127	0.00960847	0.777296	0.263411	2.93431e-15
MED4	blue	0.310116	7.94246e-21	-0.310116	7.94246e-21	0.763801	5.02928e-167	0.0160402	0.636787	0.268017	9.21198e-16
HMOX1	blue	0.01307	0.700422	-0.01307	0.700422	-0.372243	5.99609e-30	0.0638007	0.0601112	0.0671814	0.0477244
CRTC2	blue	0.119273	0.000425824	-0.119273	0.000425824	-0.440042	1.85489e-42	-0.0329597	0.331809	0.186968	2.81279e-08
PTPN4	blue	-0.0170082	0.616585	0.0170082	0.616585	0.632493	2.78396e-98	0.260364	6.23636e-15	-0.110607	0.00109116
VBP1	blue	-0.0177635	0.601019	0.0177635	0.601019	0.73373	1.103e-147	0.00548308	0.871776	-0.100807	0.0029302
SIRT1	blue	0.471016	3.40754e-49	-0.471016	3.40754e-49	0.767468	1.39577e-169	0.00285822	0.932949	0.428697	3.6863e-40
TMEM181	blue	0.115581	0.000640779	-0.115581	0.000640779	0.690831	2.98034e-124	0.251743	4.99621e-14	0.0425884	0.209764
MAP3K11	blue	0.0592527	0.08086	-0.0592527	0.08086	-0.490499	8.45673e-54	-0.11147	0.000996402	0.145425	1.67976e-05
OXR1	blue	0.28761	5.16813e-18	-0.28761	5.16813e-18	0.706853	1.66452e-132	-0.0149904	0.659005	0.231004	5.44891e-12
OSGIN2	blue	0.151734	7.03803e-06	-0.151734	7.03803e-06	0.641518	6.2452e-102	-0.0498016	0.142406	0.144977	1.78444e-05
CLEC2B	blue	0.00484589	0.88657	-0.00484589	0.88657	0.443943	2.86835e-43	0.0566663	0.0950397	-0.0473607	0.163043
BTAF1	blue	0.0379566	0.263692	-0.0379566	0.263692	0.733307	1.97551e-147	0.130762	0.000110735	-0.043713	0.197966
CCPG1	blue	0.228915	8.53255e-12	-0.228915	8.53255e-12	0.70622	3.61592e-132	-0.0903939	0.00766844	0.216884	1.0377e-10
AHSA2	blue	0.18408	4.61793e-08	-0.18408	4.61793e-08	0.44502	1.70612e-43	0.064893	0.0558466	0.134157	7.27688e-05
CRIP2	blue	-0.0612676	0.0710445	0.0612676	0.0710445	-0.147315	1.29935e-05	-0.0762463	0.0245962	-0.060164	0.0762923
LDLRAP1	blue	0.0693904	0.0408483	-0.0693904	0.0408483	-0.304644	4.04435e-20	-0.0772658	0.0227366	0.0585313	0.0846305
CSTA	blue	0.114251	0.000740356	-0.114251	0.000740356	0.320011	3.83149e-22	-0.161786	1.6348e-06	0.0984292	0.00367895
CAPZA2	blue	0.143016	2.31976e-05	-0.143016	2.31976e-05	0.653348	6.63301e-107	-0.0461887	0.173718	0.112797	0.000865435
SLK	blue	0.555927	1.21778e-71	-0.555927	1.21778e-71	0.798089	5.99908e-193	-0.0487232	0.151262	0.51005	9.94064e-59
ACTR6	blue	-0.295804	5.21966e-19	0.295804	5.21966e-19	0.580773	1.62035e-79	0.070042	0.0389875	-0.370575	1.12332e-29
SRP9	blue	0.211698	2.91575e-10	-0.211698	2.91575e-10	0.86004	1.3462e-255	0.0056185	0.868637	0.137399	4.82797e-05
UBL5	blue	0.0659837	0.0518423	-0.0659837	0.0518423	0.26203	4.13404e-15	-0.115112	0.000674351	0.0186163	0.583662
XPNPEP2	blue	0.0263932	0.437125	-0.0263932	0.437125	-0.259896	6.99597e-15	0.0424265	0.211502	0.0538611	0.112597
TC2N	blue	0.410701	1.09001e-36	-0.410701	1.09001e-36	0.749291	2.3911e-157	0.0767914	0.0235863	0.331821	8.83726e-24
TAF7	blue	0.245977	1.92429e-13	-0.245977	1.92429e-13	0.762411	4.55535e-166	-0.0871311	0.0101783	0.198086	3.87627e-09
AZI2	blue	0.550523	5.14965e-70	-0.550523	5.14965e-70	0.757334	1.25516e-162	-0.0022356	0.947531	0.50004	3.64251e-56
GCLM	blue	-0.107603	0.00148972	0.107603	0.00148972	0.578557	8.70357e-79	0.126459	0.000185844	-0.151147	7.64264e-06
IDI1	blue	0.301581	9.91071e-20	-0.301581	9.91071e-20	0.580016	2.88059e-79	-0.0396476	0.242992	0.258721	9.3275e-15
KBTBD7	blue	0.441695	8.43434e-43	-0.441695	8.43434e-43	0.751913	4.78385e-159	-0.0308979	0.36296	0.421941	7.84268e-39
INTS8	blue	0.0660009	0.0517812	-0.0660009	0.0517812	0.521855	7.27518e-62	-0.00711915	0.834007	0.0181653	0.592812
ATP8B4	blue	-0.0342888	0.31267	0.0342888	0.31267	0.505455	1.53086e-57	0.0741535	0.0288287	-0.0685045	0.0434979
BCAT1	blue	0.159552	2.27916e-06	-0.159552	2.27916e-06	0.414538	2.06533e-37	0.0169696	0.617385	0.147247	1.31141e-05
ZNF83	blue	0.0515808	0.128671	-0.0515808	0.128671	0.483644	3.81482e-52	0.128435	0.000146814	-0.0112832	0.739777
SLC35A1	blue	-0.00439697	0.897016	0.00439697	0.897016	0.725601	6.67307e-143	0.0794701	0.0191285	-0.0788977	0.0200138
WASF2	blue	0.0578626	0.0882516	-0.0578626	0.0882516	-0.516418	2.0957e-60	-0.00797092	0.814489	0.128588	0.000144146
SRM	blue	0.0741994	0.0287297	-0.0741994	0.0287297	-0.385198	4.04045e-32	0.0247729	0.465797	0.068953	0.0421388
PHGDH	blue	0.0125411	0.711994	-0.0125411	0.711994	-0.260619	5.85674e-15	-0.0982298	0.00374903	0.0192908	0.570101
BIRC2	blue	0.212041	2.72533e-10	-0.212041	2.72533e-10	0.817911	2.38789e-210	-0.030368	0.371252	0.166303	8.23484e-07
SIGLEC5	blue	-0.0431074	0.204257	0.0431074	0.204257	-0.246179	1.83665e-13	-0.101409	0.00276401	0.0105038	0.757169
RB1CC1	blue	0.571745	1.41009e-76	-0.571745	1.41009e-76	0.772216	5.79011e-173	-0.0571851	0.0920462	0.526303	4.4465e-63
PRF1	blue	0.027687	0.41498	-0.027687	0.41498	-0.26664	1.30549e-15	0.430048	1.98371e-40	0.0276404	0.415765
GNG10	blue	0.374633	2.42494e-30	-0.374633	2.42494e-30	0.703242	1.3483e-130	-0.0854604	0.0117269	0.352532	7.90216e-27
PARP14	blue	-0.0204857	0.54645	0.0204857	0.54645	-0.172922	2.91463e-07	0.00388971	0.908842	-0.0306314	0.367115
FAM76B	blue	0.457395	3.80209e-46	-0.457395	3.80209e-46	0.702491	3.33641e-130	0.0251898	0.458322	0.414157	2.43836e-37
ANKRD12	blue	0.280394	3.6591e-17	-0.280394	3.6591e-17	0.833812	6.39182e-226	-0.0248556	0.464308	0.217272	9.59546e-11
TRIO	blue	-0.0343541	0.31175	0.0343541	0.31175	-0.232377	4.04834e-12	0.0472828	0.163737	-0.0169083	0.618658
UHMK1	blue	0.00597215	0.860451	-0.00597215	0.860451	0.438795	3.35179e-42	0.124319	0.000239006	-0.05982	0.0779913
BCL9L	blue	0.0204447	0.547254	-0.0204447	0.547254	-0.454333	1.76365e-45	0.119627	0.000409199	0.0202207	0.551653
VWF	blue	-0.0849111	0.0122799	0.0849111	0.0122799	-0.306852	2.10569e-20	-0.131408	0.00010231	-0.0361274	0.287417
POMZP3	blue	0.0251282	0.459422	-0.0251282	0.459422	-0.186879	2.85646e-08	-0.000493564	0.988408	0.0387172	0.254236
TMEM55A	blue	0.638661	9.20139e-101	-0.638661	9.20139e-101	0.677145	1.28138e-117	0.0058821	0.862534	0.624179	5.02071e-95
IFIT5	blue	0.282624	2.0106e-17	-0.282624	2.0106e-17	0.633996	7.00372e-99	-0.131358	0.000102949	0.236961	1.48075e-12
TMEM126B	blue	-0.0775229	0.0222875	0.0775229	0.0222875	0.632883	1.94796e-98	0.037531	0.269088	-0.161413	1.72865e-06
ST3GAL6	blue	0.306187	2.56492e-20	-0.306187	2.56492e-20	0.554759	2.75072e-71	-0.115103	0.000675039	0.300592	1.32059e-19
FCGBP	blue	-0.0338362	0.319104	0.0338362	0.319104	-0.251026	5.91873e-14	-0.00059571	0.986009	-0.0436982	0.198118
NDST1	blue	-0.0798112	0.0186173	0.0798112	0.0186173	-0.364843	9.43729e-29	-0.12598	0.000196681	-0.00112622	0.973554
IL18R1	blue	0.244201	2.89546e-13	-0.244201	2.89546e-13	0.451325	7.84485e-45	0.0876615	0.00972616	0.251013	5.9366e-14
FMNL1	blue	0.0411098	0.226035	-0.0411098	0.226035	-0.574448	1.89966e-77	-0.0483457	0.154459	0.120417	0.000374264
DDX60	blue	-0.113006	0.000846321	0.113006	0.000846321	0.539906	6.63885e-67	-0.00402909	0.90559	-0.17954	9.90961e-08
RBM12B	blue	0.115828	0.000623713	-0.115828	0.000623713	0.742792	3.16296e-153	0.0471846	0.164615	0.0483012	0.15484
ATG4B	blue	0.00853943	0.801525	-0.00853943	0.801525	-0.374173	2.88767e-30	0.0120333	0.723168	0.0450801	0.184287
LXN	blue	0.0485008	0.15314	-0.0485008	0.15314	0.387044	1.94538e-32	-0.0831774	0.0141791	0.0207684	0.540926
ENOSF1	blue	0.0578033	0.0885784	-0.0578033	0.0885784	0.106905	0.00159987	0.130872	0.000109257	0.00763619	0.822146
CLK4	blue	0.259534	7.6447e-15	-0.259534	7.6447e-15	0.637124	3.86877e-100	0.0122139	0.719187	0.215709	1.31446e-10
PNPLA8	blue	0.557232	4.87777e-72	-0.557232	4.87777e-72	0.7602	1.46893e-164	-0.0582778	0.0859891	0.507697	4.0513e-58
TMEM88	blue	0.00703087	0.836036	-0.00703087	0.836036	-0.347395	4.7365e-26	-0.162852	1.39278e-06	0.0898876	0.00801744
ABHD3	blue	0.165931	8.71877e-07	-0.165931	8.71877e-07	0.659064	2.17673e-109	0.067337	0.0472103	0.151827	6.94641e-06
FAM126B	blue	0.0645302	0.0572344	-0.0645302	0.0572344	0.333018	5.97478e-24	0.0308633	0.363498	0.0726115	0.032335
DEK	blue	0.153187	5.73136e-06	-0.153187	5.73136e-06	0.840196	1.20795e-232	0.070921	0.0365918	0.0805182	0.0175957
NELL2	blue	0.187737	2.46202e-08	-0.187737	2.46202e-08	0.34973	2.10726e-26	-0.0207061	0.542142	0.12585	0.000199715
PTAFR	blue	0.077638	0.0220888	-0.077638	0.0220888	-0.396128	4.97752e-34	-0.0836779	0.0136059	0.166112	8.48043e-07
GPR160	blue	0.367821	3.13973e-29	-0.367821	3.13973e-29	0.660899	3.376e-110	-0.100801	0.00293195	0.351218	1.25331e-26
KIAA1598	blue	0.180736	8.12022e-08	-0.180736	8.12022e-08	0.483949	3.22642e-52	0.0402684	0.235687	0.152882	5.9845e-06
RNF24	blue	0.00364058	0.914657	-0.00364058	0.914657	-0.366194	5.73613e-29	-0.0872536	0.0100722	0.0720026	0.0338167
AKAP7	blue	-0.090582	0.00754234	0.090582	0.00754234	0.626306	7.53393e-96	-0.0127134	0.708218	-0.164086	1.15566e-06
XYLT1	blue	-0.00184065	0.95679	0.00184065	0.95679	0.139343	3.75801e-05	-0.0367731	0.278882	-0.00625308	0.853959
KYNU	blue	0.0306595	0.366676	-0.0306595	0.366676	0.291316	1.84936e-18	-0.118526	0.000462928	0.00376537	0.911744
LRRC6	blue	-0.00510007	0.880663	0.00510007	0.880663	0.0883637	0.00915515	-0.0714179	0.0352936	0.0112083	0.741444
SH3BP1	blue	-0.0629676	0.0635422	0.0629676	0.0635422	-0.420586	1.43593e-38	-0.0263157	0.438473	-0.0237951	0.48359
COMMD8	blue	-0.0247304	0.466561	0.0247304	0.466561	0.685811	8.91413e-122	-0.0163082	0.631167	-0.0913518	0.00704516
TLR4	blue	0.0325061	0.338509	-0.0325061	0.338509	0.302433	7.73172e-20	-0.0430614	0.204741	0.0633986	0.0617473
RGS18	blue	0.517189	1.30562e-60	-0.517189	1.30562e-60	0.702619	2.85825e-130	-0.058442	0.085107	0.475807	2.67572e-50
MRPL13	blue	-0.0372885	0.272196	0.0372885	0.272196	0.474095	6.67391e-50	-0.00911	0.788568	-0.106825	0.00161294
HOPX	blue	-0.00797064	0.814495	0.00797064	0.814495	0.275445	1.35586e-16	0.480705	1.90304e-51	-0.06727	0.0474311
GMCL1	blue	0.214375	1.71616e-10	-0.214375	1.71616e-10	0.767769	8.55704e-170	-0.00419144	0.901805	0.175142	2.03882e-07
PRSS23	blue	0.0265251	0.434838	-0.0265251	0.434838	0.153806	5.24792e-06	0.5244	1.47726e-62	-0.00353098	0.917217
CNOT3	blue	0.0449047	0.186002	-0.0449047	0.186002	-0.435061	1.94114e-41	-0.0181575	0.592972	0.0939356	0.00558409
ZNF385A	blue	0.11531	0.000660012	-0.11531	0.000660012	-0.429047	3.14029e-40	-0.132846	8.56796e-05	0.183777	4.86294e-08
RIN3	blue	0.224038	2.39015e-11	-0.224038	2.39015e-11	-0.578658	8.06221e-79	-0.00685504	0.840081	0.304993	3.64983e-20
KBTBD8	blue	0.488667	2.36093e-53	-0.488667	2.36093e-53	0.727626	4.45865e-144	-0.0554766	0.102198	0.428811	3.49972e-40
SLC25A23	blue	0.074309	0.0284939	-0.074309	0.0284939	-0.336899	1.65961e-24	-0.10823	0.00139691	0.0799914	0.018352
ITGA4	blue	0.374129	2.93631e-30	-0.374129	2.93631e-30	0.725057	1.37339e-142	0.0786972	0.0203323	0.319232	4.88313e-22
VAMP7	blue	0.0651487	0.0548857	-0.0651487	0.0548857	0.734143	6.23451e-148	-0.0302891	0.372496	0.00371789	0.912852
BST1	blue	0.0638279	0.060002	-0.0638279	0.060002	0.343353	1.89329e-25	-0.159407	2.3287e-06	0.0678694	0.0454856
CTSD	blue	0.0443903	0.191099	-0.0443903	0.191099	-0.481796	1.04977e-51	-0.0613075	0.0708605	0.120163	0.000385193
GK	blue	0.0931154	0.00601521	-0.0931154	0.00601521	0.318246	6.63492e-22	-0.089787	0.0080885	0.122783	0.000285609
SSBP3	blue	0.134135	7.29681e-05	-0.134135	7.29681e-05	-0.479031	4.72057e-51	0.138121	4.40068e-05	0.190591	1.49374e-08
GDPD1	blue	0.0942104	0.00544602	-0.0942104	0.00544602	0.442574	5.53682e-43	0.0539067	0.112293	0.0451637	0.183474
AGPAT9	blue	0.109248	0.00125746	-0.109248	0.00125746	0.322832	1.58078e-22	-0.047373	0.162934	0.138295	4.30321e-05
SYTL2	blue	0.0629651	0.0635526	-0.0629651	0.0635526	0.25438	2.6655e-14	0.428867	3.41111e-40	0.00746754	0.826011
ANXA3	blue	-0.0932812	0.00592572	0.0932812	0.00592572	0.354649	3.74232e-27	-0.154394	4.82561e-06	-0.0965194	0.00440179
CNIH4	blue	-0.00254005	0.940398	0.00254005	0.940398	0.449301	2.12296e-44	-0.103856	0.0021736	-0.0335774	0.322822
GCAT	blue	-0.0700252	0.0390347	0.0700252	0.0390347	-0.212167	2.65834e-10	-0.132468	8.97928e-05	-0.029537	0.384491
PKN2	blue	0.219477	6.13057e-11	-0.219477	6.13057e-11	0.67972	7.71523e-119	-0.0656801	0.052932	0.195983	5.69032e-09
FAM26F	blue	0.0705375	0.0376212	-0.0705375	0.0376212	0.205554	9.58416e-10	-0.042168	0.214301	0.0537378	0.113423
GFOD1	blue	0.0733771	0.030551	-0.0733771	0.030551	-0.37054	1.13805e-29	0.279987	4.07921e-17	0.084207	0.0130223
RTP4	blue	0.021212	0.532316	-0.021212	0.532316	0.249775	7.94567e-14	0.0343593	0.311676	-0.0137885	0.684814
CXCR5	blue	0.0344515	0.310379	-0.0344515	0.310379	-0.118654	0.000456384	-0.124876	0.000223951	0.0167145	0.622685
CSF2RB	blue	0.0282107	0.406207	-0.0282107	0.406207	0.180305	8.72507e-08	-0.0378337	0.265242	0.0688823	0.0423509
PCMTD2	blue	0.0887338	0.00886637	-0.0887338	0.00886637	0.290584	2.26836e-18	0.210426	3.74177e-10	0.0713285	0.0355242
CD58	blue	0.109435	0.00123328	-0.109435	0.00123328	0.64137	7.18542e-102	-0.0306045	0.367537	0.0876168	0.00976359
CD27	blue	0.0779534	0.0215526	-0.0779534	0.0215526	-0.258851	9.0361e-15	-0.0619203	0.0680824	0.0591416	0.0814317
C20orf27	blue	0.086867	0.0104103	-0.086867	0.0104103	-0.350126	1.83579e-26	0.0573856	0.0909097	0.110714	0.00107897
VNN1	blue	0.115125	0.000673447	-0.115125	0.000673447	0.302835	6.87658e-20	-0.058232	0.0862362	0.130677	0.0001119
RNASEH2B	blue	0.0802946	0.0179133	-0.0802946	0.0179133	0.505266	1.7112e-57	-0.00173168	0.959346	0.0118268	0.727728
RP2	blue	0.0181724	0.592669	-0.0181724	0.592669	0.625342	1.78287e-95	0.0571678	0.0921448	0.0117025	0.730478
C14orf2	blue	-0.0260221	0.443601	0.0260221	0.443601	0.430047	1.98494e-40	-0.113247	0.000824797	-0.0890223	0.00864686
RNPEP	blue	0.114527	0.000718598	-0.114527	0.000718598	-0.415388	1.42484e-37	-0.015612	0.645811	0.182903	5.63997e-08
GIMAP2	blue	0.0651363	0.0549316	-0.0651363	0.0549316	0.703971	5.58617e-131	0.0144923	0.669654	-0.00864362	0.799154
NLRP2	blue	-0.015978	0.638095	0.015978	0.638095	-0.154443	4.79186e-06	0.100268	0.00308664	-0.0136354	0.68813
CECR6	blue	0.043761	0.197474	-0.043761	0.197474	-0.283423	1.6201e-17	-0.0917343	0.00680921	0.109412	0.00123614
GNAQ	blue	0.0103745	0.760066	-0.0103745	0.760066	0.403159	2.69341e-35	-0.0189087	0.577764	0.0213902	0.528876
GPR65	blue	0.0509751	0.133227	-0.0509751	0.133227	0.71789	1.59678e-138	0.00191802	0.954976	-0.0264995	0.435281
SERPING1	blue	0.00590979	0.861893	-0.00590979	0.861893	-0.247264	1.4285e-13	-0.15422	4.94715e-06	0.0520453	0.12526
SLC1A5	blue	0.0406119	0.231712	-0.0406119	0.231712	-0.383062	9.36057e-32	-0.0224478	0.508699	0.110345	0.00112155
CXCR3	blue	0.04349	0.200266	-0.04349	0.200266	-0.240345	6.95084e-13	0.161701	1.65562e-06	0.0336761	0.3214
NFYB	blue	-0.118099	0.000485502	0.118099	0.000485502	0.548662	1.84069e-69	-0.0541183	0.110888	-0.186502	3.04873e-08
ASNSD1	blue	0.0298915	0.378808	-0.0298915	0.378808	0.606112	2.80016e-88	0.00301826	0.929204	-0.0375202	0.269226
CBS	blue	-0.0569758	0.0932444	0.0569758	0.0932444	-0.229959	6.82215e-12	-0.0941059	0.00549814	-0.00843596	0.80388
AUTS2	blue	0.026747	0.431004	-0.026747	0.431004	-0.198065	3.89158e-09	0.34017	5.55792e-25	0.0161298	0.634905
ERGIC2	blue	0.0757107	0.0256246	-0.0757107	0.0256246	0.656393	3.20024e-108	-0.0531531	0.117409	0.0242178	0.475853
CD24	blue	0.0762484	0.0245922	-0.0762484	0.0245922	0.299108	2.02752e-19	-0.0980456	0.00381485	0.0336138	0.322298
LGALS9	blue	0.0622004	0.066843	-0.0622004	0.066843	-0.391859	2.8274e-33	-0.114232	0.00074186	0.121445	0.000332971
ABCA1	blue	0.0289536	0.393954	-0.0289536	0.393954	0.408352	2.98617e-36	-0.108969	0.00129431	0.0348608	0.304662
FCER2	blue	0.0186023	0.583945	-0.0186023	0.583945	-0.185168	3.8351e-08	-0.126545	0.000183967	0.0104414	0.758565
KLRF1	blue	0.0928321	0.00617095	-0.0928321	0.00617095	0.452741	3.89198e-45	0.419829	2.0107e-38	0.0421952	0.214005
GLRX	blue	0.0172097	0.612416	-0.0172097	0.612416	0.44541	1.41294e-43	-0.14496	1.7885e-05	-0.0394079	0.245855
SAMD9	blue	0.10019	0.0031098	-0.10019	0.0031098	0.733085	2.67936e-147	-0.0692029	0.0413975	0.0296681	0.382383
TPST1	blue	-0.0083175	0.806579	0.0083175	0.806579	0.0920155	0.00664035	-0.0680968	0.0447654	0.0193871	0.568175
PNPLA2	blue	0.0263156	0.438476	-0.0263156	0.438476	-0.465453	6.21981e-48	-0.163032	1.35555e-06	0.12204	0.000311056
PACS1	blue	0.0949929	0.00506947	-0.0949929	0.00506947	-0.590615	7.91051e-83	-0.0704696	0.0378059	0.168485	5.87306e-07
TARP	blue	0.0430435	0.20493	-0.0430435	0.20493	0.0995242	0.00331484	0.406058	7.92711e-36	0.0122662	0.718034
AKR1C3	blue	0.0187443	0.581077	-0.0187443	0.581077	0.283974	1.39568e-17	0.223346	2.76089e-11	-0.0334637	0.324464
EVI2A	blue	0.259208	8.2798e-15	-0.259208	8.2798e-15	0.743963	5.84132e-154	-0.131499	0.000101173	0.19948	2.99847e-09
PDZK1IP1	blue	-0.0275229	0.417753	0.0275229	0.417753	-0.3054	3.23675e-20	-0.00620582	0.85505	0.0101494	0.765116
PRDX4	blue	0.179727	9.60701e-08	-0.179727	9.60701e-08	0.365028	8.81564e-29	-0.0286364	0.399159	0.131195	0.000105024
TYW1	blue	0.115133	0.00067287	-0.115133	0.00067287	0.309258	1.02744e-20	-0.0468503	0.16763	0.067878	0.0454582
S100A12	blue	0.0151252	0.656134	-0.0151252	0.656134	0.256298	1.68031e-14	-0.189286	1.87871e-08	-0.0168485	0.6199
CHURC1	blue	0.108862	0.00130869	-0.108862	0.00130869	0.463986	1.32622e-47	-0.0166622	0.623773	0.0597908	0.0781369
TMEM176A	blue	-0.0301979	0.373939	0.0301979	0.373939	-0.0650744	0.0551633	0.0157261	0.643401	-0.0174944	0.606546
COX7B	blue	-0.140879	3.07593e-05	0.140879	3.07593e-05	0.51508	4.74773e-60	-0.0942637	0.00541958	-0.210333	3.80993e-10
S100P	blue	0.0182278	0.591541	-0.0182278	0.591541	0.148251	1.14271e-05	-0.147925	1.19512e-05	0.0199912	0.556178
GSTM1	blue	0.0594951	0.0796237	-0.0594951	0.0796237	-0.203324	1.4628e-09	-0.0312787	0.357072	0.0566026	0.0954128
GSTM2	blue	0.0694822	0.0405816	-0.0694822	0.0405816	-0.219771	5.77274e-11	-0.0310644	0.360379	0.0645649	0.0571002
PTGDR	grey	0.0156218	0.645604	-0.0156218	0.645604	0.0369563	0.276493	1	0	-0.00598981	0.860043
RAB15	turquoise	0.392694	2.01718e-33	-0.392694	2.01718e-33	0.095445	0.00486279	-0.0897949	0.0080829	0.383654	7.42092e-32
JMJD1C	turquoise	0.744318	3.49636e-154	-0.744318	3.49636e-154	0.298502	2.41364e-19	0.0411169	0.225955	0.75962	3.63545e-164
NDUFAF2	turquoise	-0.414798	1.84387e-37	0.414798	1.84387e-37	-0.0269728	0.427122	-0.0223987	0.509626	-0.470054	5.65421e-49
AKTIP	turquoise	0.165074	9.94176e-07	-0.165074	9.94176e-07	0.269129	6.94102e-16	0.0159401	0.638891	0.152829	6.02964e-06
ISG20	turquoise	-0.448898	2.58589e-44	0.448898	2.58589e-44	-0.120778	0.000359235	0.0158924	0.639895	-0.484266	2.71015e-52
HEATR2	turquoise	0.0574347	0.0906336	-0.0574347	0.0906336	-0.142362	2.53013e-05	0.084105	0.0131331	0.0490733	0.148343
RNF152	turquoise	0.857583	1.43813e-252	-0.857583	1.43813e-252	0.144483	1.90707e-05	-0.00218867	0.948631	0.854057	2.54334e-248
TSSC1	turquoise	0.0594659	0.079772	-0.0594659	0.079772	-0.0561266	0.0982361	0.134338	7.11365e-05	0.0275018	0.418108
NENF	turquoise	-0.426725	9.06347e-40	0.426725	9.06347e-40	-0.0181145	0.593846	-0.041535	0.221267	-0.472661	1.42875e-49
DEFB122	turquoise	0.492167	3.30411e-54	-0.492167	3.30411e-54	-0.0960584	0.00459453	-0.0511168	0.13215	0.498046	1.15363e-55
DISP2	turquoise	0.795478	8.40823e-191	-0.795478	8.40823e-191	0.10986	0.00117981	0.00670603	0.843512	0.785688	5.05638e-183
TGFBRAP1	turquoise	-0.0552534	0.103588	0.0552534	0.103588	-0.125876	0.00019912	0.180552	8.37247e-08	-0.0887344	0.00886586
TIMM8A	turquoise	0.218294	7.80158e-11	-0.218294	7.80158e-11	-0.111874	0.000954701	-0.0342738	0.312882	0.214454	1.68947e-10
BUB1	turquoise	-0.845625	1.34011e-238	0.845625	1.34011e-238	-0.256237	1.70487e-14	-0.0598338	0.0779227	-0.817678	3.92635e-210
MUC2	turquoise	0.793712	2.28514e-189	-0.793712	2.28514e-189	0.0960312	0.00460614	-0.0165493	0.626127	0.78896	1.41352e-185
ACP6	turquoise	0.371527	7.85312e-30	-0.371527	7.85312e-30	0.0916399	0.00686678	-0.0392546	0.247698	0.367317	3.78586e-29
CHST2	turquoise	0.434933	2.06101e-41	-0.434933	2.06101e-41	0.0341084	0.315225	0.139597	3.63611e-05	0.4636	1.61783e-47
FCF1	turquoise	-0.322539	1.73367e-22	0.322539	1.73367e-22	0.0450278	0.184798	-0.0591837	0.0812148	-0.358756	8.63111e-28
LAPTM4B	turquoise	0.122376	0.000299305	-0.122376	0.000299305	0.135831	5.89443e-05	-0.0983625	0.00370227	0.114566	0.00071553
LTB4R	turquoise	-0.565914	1.00006e-74	0.565914	1.00006e-74	-0.41361	3.09403e-37	-0.0858202	0.0113768	-0.505297	1.68028e-57
TNFSF8	turquoise	-0.512521	2.24424e-59	0.512521	2.24424e-59	0.125861	0.00019947	-0.053887	0.112424	-0.536084	8.21698e-66
ANKRD44	turquoise	-0.0280044	0.409651	0.0280044	0.409651	0.0900536	0.00790153	0.0665232	0.049952	-0.0161424	0.634641
ZNF22	turquoise	-0.236877	1.50829e-12	0.236877	1.50829e-12	0.432355	6.83925e-41	0.0412398	0.224569	-0.327909	3.13761e-23
TCHP	turquoise	0.0948693	0.00512733	-0.0948693	0.00512733	-0.0752663	0.0265062	0.0281797	0.406723	0.120736	0.000360962
GABRB2	turquoise	0.332113	8.03279e-24	-0.332113	8.03279e-24	-0.19666	5.03141e-09	-0.0370506	0.275269	0.342474	2.55237e-25
NCAPD3	turquoise	-0.708928	1.29256e-133	0.708928	1.29256e-133	-0.0749436	0.0271625	0.0802598	0.0179632	-0.718163	1.12345e-138
NLK	turquoise	0.357216	1.50007e-27	-0.357216	1.50007e-27	0.296741	3.99781e-19	0.0714846	0.0351225	0.375562	1.70185e-30
APOOL	turquoise	-0.925585	0	0.925585	0	-0.155552	4.08597e-06	0.00472083	0.889478	-0.918623	0
STIP1	turquoise	0.278487	6.08108e-17	-0.278487	6.08108e-17	-0.391893	2.78841e-33	0.0834153	0.013904	0.321408	2.47423e-22
MBOAT7	turquoise	0.485709	1.22258e-52	-0.485709	1.22258e-52	-0.0240625	0.478687	-0.0287174	0.397826	0.528912	8.46808e-64
MT1G	turquoise	0.375621	1.66396e-30	-0.375621	1.66396e-30	-0.147089	1.34009e-05	-0.0628833	0.0638981	0.396048	5.1431e-34
CD48	turquoise	-0.363066	1.80948e-28	0.363066	1.80948e-28	0.0614687	0.0701208	0.00321862	0.924518	-0.431699	9.26899e-41
RAB11FIP4	turquoise	0.140069	3.41926e-05	-0.140069	3.41926e-05	-0.326619	4.74503e-23	-0.080566	0.0175284	0.213678	1.97156e-10
TXNIP	turquoise	0.660018	8.26903e-110	-0.660018	8.26903e-110	0.193718	8.56318e-09	-0.0131377	0.698946	0.660306	6.17555e-110
SEMA3C	turquoise	0.346035	7.56567e-26	-0.346035	7.56567e-26	0.467348	2.32701e-48	-0.10926	0.00125584	0.341801	3.2064e-25
TOP2A	turquoise	-0.222328	3.41045e-11	0.222328	3.41045e-11	-0.0684435	0.0436856	-0.0104253	0.758926	-0.230534	6.02891e-12
AEBP1	turquoise	-0.82547	1.48629e-217	0.82547	1.48629e-217	-0.417323	6.0923e-38	-0.0751683	0.0267039	-0.79917	7.58696e-194
ATP12A	turquoise	0.772574	3.19858e-173	-0.772574	3.19858e-173	0.137625	4.69015e-05	-0.0197614	0.560728	0.764172	2.78709e-167
MSRB2	turquoise	0.368529	2.41305e-29	-0.368529	2.41305e-29	0.0753977	0.0262428	-0.0602182	0.0760274	0.388341	1.16085e-32
EPB41L4A	turquoise	0.353189	6.26968e-27	-0.353189	6.26968e-27	0.0302376	0.373311	0.172863	2.94251e-07	0.37075	1.05193e-29
USP43	turquoise	0.109649	0.00120605	-0.109649	0.00120605	-0.0412705	0.224225	0.102156	0.00256997	0.117137	0.000540187
TIMM17B	turquoise	0.256414	1.63378e-14	-0.256414	1.63378e-14	-0.0139072	0.682248	-0.173259	2.76175e-07	0.270352	5.07622e-16
NDUFB11	turquoise	-0.758651	1.63795e-163	0.758651	1.63795e-163	-0.231483	4.91364e-12	-0.0024321	0.942926	-0.805012	8.50476e-199
SPON1	turquoise	0.118766	0.000450685	-0.118766	0.000450685	0.138008	4.46496e-05	0.0522426	0.123833	0.0893096	0.00843317
RPL22L1	turquoise	-0.827302	2.3663e-219	0.827302	2.3663e-219	-0.047008	0.166203	-0.0833505	0.0139786	-0.828292	2.46974e-220
NSMCE4A	turquoise	-0.828902	6.09624e-221	0.828902	6.09624e-221	-0.0109242	0.747773	0.0278162	0.412805	-0.875267	9.36674e-276
GATM	turquoise	0.441697	8.42605e-43	-0.441697	8.42605e-43	0.35748	1.3644e-27	-0.0500908	0.1401	0.414997	1.69039e-37
FCN1	turquoise	-0.0706247	0.0373851	0.0706247	0.0373851	-0.096994	0.00421106	-0.0079301	0.815422	-0.0412478	0.224479
SEC14L5	turquoise	0.285756	8.59187e-18	-0.285756	8.59187e-18	-0.227155	1.24082e-11	-0.089945	0.00797715	0.353075	6.52673e-27
DDX43	turquoise	-0.860215	8.14285e-256	0.860215	8.14285e-256	-0.206908	7.39556e-10	-0.0357921	0.291916	-0.844096	6.70787e-237
DISC1	turquoise	-0.917899	0	0.917899	0	-0.331162	1.09527e-23	-0.05181	0.126979	-0.892859	1.25357e-302
RPIA	turquoise	0.673219	8.80304e-116	-0.673219	8.80304e-116	0.288052	4.57486e-18	-0.0190701	0.574522	0.67085	1.09448e-114
JSRP1	turquoise	-0.879145	2.58085e-281	0.879145	2.58085e-281	-0.310735	6.59075e-21	-0.00934552	0.783236	-0.851394	3.47371e-245
CDKAL1	turquoise	0.217834	8.5649e-11	-0.217834	8.5649e-11	-0.0712794	0.0356515	0.0582775	0.0859907	0.221433	4.10325e-11
SPAG8	turquoise	-0.271484	3.79458e-16	0.271484	3.79458e-16	-0.313118	3.20434e-21	0.015698	0.643995	-0.276762	9.59161e-17
HLA-DPA1	turquoise	0.178336	1.20962e-07	-0.178336	1.20962e-07	0.0647197	0.0565058	0.0252237	0.457717	0.142503	2.48337e-05
KRT84	turquoise	0.798706	1.84346e-193	-0.798706	1.84346e-193	0.139524	3.6709e-05	-0.00526887	0.876744	0.789632	4.16604e-186
DYNLT1	turquoise	-0.655844	5.54138e-108	0.655844	5.54138e-108	-0.0387535	0.253791	-0.0240689	0.47857	-0.680149	4.81426e-119
KRTAP4-7	turquoise	0.821796	5.21816e-214	-0.821796	5.21816e-214	0.128066	0.000153464	-0.0126162	0.710346	0.821943	3.77888e-214
MATK	turquoise	-0.431605	9.67849e-41	0.431605	9.67849e-41	-0.330005	1.59468e-23	0.369593	1.62231e-29	-0.451258	8.10825e-45
SERPINA1	turquoise	0.605314	5.43475e-88	-0.605314	5.43475e-88	0.116913	0.000553669	-0.0134226	0.692746	0.626156	8.62236e-96
DLGAP4	turquoise	0.353601	5.42085e-27	-0.353601	5.42085e-27	-0.516439	2.06841e-60	-0.0339295	0.317771	0.426419	1.04182e-39
GNA13	turquoise	0.812243	3.66202e-205	-0.812243	3.66202e-205	0.464033	1.29439e-47	0.00229224	0.946203	0.787906	9.49428e-185
KRTAP4-12	turquoise	0.817851	2.71483e-210	-0.817851	2.71483e-210	0.131338	0.000103196	-0.00283549	0.93348	0.809824	5.29511e-203
CLRN3	turquoise	0.753184	7.05823e-160	-0.753184	7.05823e-160	0.133458	7.94016e-05	-0.0097309	0.774534	0.736158	3.79906e-149
HERC6	turquoise	-0.165251	9.67611e-07	0.165251	9.67611e-07	-0.0494482	0.145264	-0.0824507	0.0150493	-0.214931	1.53604e-10
MPND	turquoise	0.175361	1.96789e-07	-0.175361	1.96789e-07	-0.286798	6.45957e-18	-0.0265836	0.433825	0.22156	3.99785e-11
SDCBP	turquoise	-0.00405347	0.905022	0.00405347	0.905022	0.115913	0.000617947	0.0372573	0.272598	0.0207174	0.541922
ZFP36L2	turquoise	0.317062	9.56838e-22	-0.317062	9.56838e-22	-0.0917733	0.00678559	0.103483	0.00225526	0.355152	3.12988e-27
BAGE	turquoise	0.600659	2.50756e-86	-0.600659	2.50756e-86	-0.0108886	0.748567	-0.0526794	0.120718	0.596386	8.00039e-85
SKAP2	turquoise	0.721622	1.26589e-140	-0.721622	1.26589e-140	0.325065	7.79167e-23	-0.051019	0.132892	0.72676	1.42256e-143
SIGLEC1	turquoise	0.161822	1.62602e-06	-0.161822	1.62602e-06	-0.263041	3.21666e-15	-0.115908	0.000618328	0.192013	1.16104e-08
ZNF70	turquoise	0.243576	3.34002e-13	-0.243576	3.34002e-13	-0.0288558	0.395554	0.0328734	0.333077	0.245741	2.03203e-13
CDCA7L	turquoise	0.288298	4.27506e-18	-0.288298	4.27506e-18	0.103034	0.00235762	-0.151732	7.04007e-06	0.269116	6.96262e-16
XAB2	turquoise	-0.341721	3.29409e-25	0.341721	3.29409e-25	-0.549763	8.67218e-70	0.00278877	0.934574	-0.337523	1.34844e-24
MORC2	turquoise	0.38364	7.45997e-32	-0.38364	7.45997e-32	-0.128756	0.000141256	-0.0396849	0.242549	0.376035	1.42061e-30
WDR25	turquoise	0.132257	9.21631e-05	-0.132257	9.21631e-05	-0.262592	3.59688e-15	-0.069444	0.0406923	0.174039	2.43622e-07
HIST1H2AC	turquoise	0.530974	2.25892e-64	-0.530974	2.25892e-64	0.302097	8.5289e-20	0.0104828	0.757638	0.537293	3.71959e-66
RBM4	turquoise	0.152263	6.53262e-06	-0.152263	6.53262e-06	0.138857	4.00187e-05	0.0237692	0.484066	0.130332	0.000116699
IMMT	turquoise	0.108335	0.00138194	-0.108335	0.00138194	-0.213434	2.06933e-10	0.108694	0.00133166	0.100584	0.0029939
RARS2	turquoise	-0.839694	4.18603e-232	0.839694	4.18603e-232	-0.180101	9.02777e-08	0.019007	0.575788	-0.86123	4.38117e-257
ZBTB16	turquoise	-0.261744	4.43794e-15	0.261744	4.43794e-15	-0.468298	1.41793e-48	0.130959	0.00010811	-0.230333	6.29544e-12
SPTAN1	turquoise	-0.770522	9.51988e-172	0.770522	9.51988e-172	-0.338204	1.07431e-24	0.0306364	0.367037	-0.785426	8.06206e-183
TIMP2	turquoise	0.133422	7.97634e-05	-0.133422	7.97634e-05	-0.320516	3.27146e-22	-0.0681585	0.0445715	0.231445	4.95407e-12
EXT1	turquoise	-0.056074	0.0985521	0.056074	0.0985521	-0.0301013	0.375471	-0.138218	4.34614e-05	-0.0340162	0.316534
AOC3	turquoise	0.216759	1.06437e-10	-0.216759	1.06437e-10	0.0677901	0.0457391	-0.0986659	0.00359728	0.253117	3.60448e-14
SMA4	turquoise	-0.362406	2.30213e-28	0.362406	2.30213e-28	-0.189111	1.93734e-08	0.0251769	0.458551	-0.380057	3.01956e-31
FKBP5	turquoise	-0.604752	8.66116e-88	0.604752	8.66116e-88	-0.160429	2.00154e-06	-0.00996481	0.769266	-0.610857	5.21857e-90
MCM5	turquoise	0.630844	1.25383e-97	-0.630844	1.25383e-97	-0.144597	1.87816e-05	-0.00609864	0.857527	0.662317	7.93037e-111
TNPO3	turquoise	-0.845627	1.33043e-238	0.845627	1.33043e-238	-0.318525	6.08318e-22	-0.0112553	0.740399	-0.839132	1.67309e-231
SLC35E1	turquoise	-0.626723	5.18867e-96	0.626723	5.18867e-96	-0.24658	1.67407e-13	-0.0133594	0.694119	-0.640574	1.524e-101
NUDT2	turquoise	-0.834448	1.40794e-226	0.834448	1.40794e-226	-0.167647	6.69056e-07	-0.0574221	0.0907042	-0.851292	4.56984e-245
CLTCL1	turquoise	0.282949	1.84196e-17	-0.282949	1.84196e-17	-0.154534	4.72955e-06	-0.113548	0.000798593	0.340835	4.44315e-25
RAB2B	turquoise	0.482036	9.20805e-52	-0.482036	9.20805e-52	0.14966	9.40507e-06	0.0290033	0.393142	0.484191	2.82414e-52
IGSF9B	turquoise	-0.847666	6.72498e-241	0.847666	6.72498e-241	-0.403586	2.25123e-35	-0.064572	0.0570729	-0.82617	3.07227e-218
KLHL6	turquoise	0.11462	0.00071139	-0.11462	0.00071139	-0.084124	0.0131123	-0.084609	0.0125937	0.145025	1.77292e-05
CDC26	turquoise	-0.784869	2.16577e-182	0.784869	2.16577e-182	-0.12681	0.000178278	-0.00363955	0.914681	-0.815851	1.91796e-208
FSTL4	turquoise	-0.711042	9.35467e-135	0.711042	9.35467e-135	-0.280872	3.22036e-17	-0.11064	0.00108738	-0.691719	1.07398e-124
GSC	turquoise	0.821973	3.53772e-214	-0.821973	3.53772e-214	0.143065	2.30484e-05	0.00555987	0.869996	0.804126	4.90485e-198
CLCA4	turquoise	0.501354	1.69617e-56	-0.501354	1.69617e-56	-0.0677147	0.0459813	-0.0291394	0.390926	0.502023	1.1487e-56
NOL9	turquoise	-0.862883	3.55882e-259	0.862883	3.55882e-259	-0.348021	3.81433e-26	0.0600883	0.0766635	-0.854089	2.33468e-248
QSOX2	turquoise	-0.30862	1.2436e-20	0.30862	1.2436e-20	-0.0230683	0.497051	0.0478723	0.158541	-0.339074	8.03022e-25
COQ2	turquoise	-0.262435	3.7396e-15	0.262435	3.7396e-15	0.31743	8.54229e-22	-0.09112	0.00719165	-0.293893	8.96915e-19
JAM3	turquoise	0.326697	4.62815e-23	-0.326697	4.62815e-23	-0.143324	2.22675e-05	-0.0732333	0.0308796	0.358117	1.086e-27
TNFRSF9	turquoise	-0.184166	4.55118e-08	0.184166	4.55118e-08	-0.277646	7.5968e-17	-0.0460421	0.175089	-0.132636	8.79402e-05
CDC42EP3	turquoise	-0.159216	2.39494e-06	0.159216	2.39494e-06	0.0843619	0.0128556	0.109365	0.00124223	-0.134007	7.41496e-05
GDE1	turquoise	0.277031	8.93746e-17	-0.277031	8.93746e-17	0.0806543	0.0174047	-0.113316	0.000818686	0.338901	8.51075e-25
LILRB4	turquoise	0.482824	5.9837e-52	-0.482824	5.9837e-52	-0.176412	1.6585e-07	-0.100557	0.00300162	0.522545	4.72867e-62
CSTF2	turquoise	0.0397762	0.241466	-0.0397762	0.241466	0.0396517	0.242944	0.0545727	0.107918	-0.00658299	0.846347
UBE2G2	turquoise	0.0546589	0.107362	-0.0546589	0.107362	-0.0449051	0.185998	0.145278	1.71361e-05	0.0266006	0.433531
KIT	turquoise	0.469069	9.47669e-49	-0.469069	9.47669e-49	0.376174	1.3468e-30	-0.0577575	0.088832	0.475949	2.48034e-50
PDCL	turquoise	-0.822106	2.63997e-214	0.822106	2.63997e-214	-0.0713056	0.0355835	-0.0463531	0.172189	-0.828509	1.50303e-220
BMPR2	turquoise	0.546544	7.77254e-69	-0.546544	7.77254e-69	0.455923	7.9664e-46	0.0835909	0.0137041	0.51629	2.26638e-60
GAB2	turquoise	0.423888	3.27203e-39	-0.423888	3.27203e-39	-0.180816	8.01124e-08	-0.0711835	0.035901	0.516509	1.98139e-60
ETS2	turquoise	0.520354	1.85072e-61	-0.520354	1.85072e-61	0.108187	0.00140317	0.0392352	0.247932	0.57509	1.17676e-77
BCL2A1	turquoise	-0.200923	2.29404e-09	0.200923	2.29404e-09	0.354549	3.87638e-27	-0.141548	2.81728e-05	-0.231122	5.31165e-12
ZFYVE26	turquoise	0.0913395	0.00705288	-0.0913395	0.00705288	-0.0165612	0.62588	0.0371472	0.274018	0.0884661	0.00907439
C3orf36	turquoise	0.82063	6.68963e-213	-0.82063	6.68963e-213	0.14333	2.22498e-05	-0.0153448	0.65147	0.818882	2.95557e-211
PNN	turquoise	-0.747794	2.18183e-156	0.747794	2.18183e-156	-0.0672457	0.0475112	0.0459717	0.175751	-0.764827	9.79174e-168
MAML3	turquoise	-0.48142	1.28908e-51	0.48142	1.28908e-51	-0.18158	7.04852e-08	-0.0499152	0.141497	-0.429887	2.13602e-40
OR51M1	turquoise	0.809939	4.1834e-203	-0.809939	4.1834e-203	0.130021	0.000121207	-0.0219183	0.518751	0.800783	3.38381e-195
TOR1B	turquoise	0.100609	0.00298664	-0.100609	0.00298664	0.144527	1.89568e-05	-0.00225648	0.947041	0.112772	0.000867709
CDK5R1	turquoise	-0.244173	2.91418e-13	0.244173	2.91418e-13	0.196871	4.84097e-09	0.00094893	0.977716	-0.236439	1.66204e-12
DNMT1	turquoise	-0.0968466	0.0042695	0.0968466	0.0042695	-0.160789	1.89729e-06	0.18504	3.91961e-08	-0.142601	2.45134e-05
WNT1	turquoise	0.771895	9.87058e-173	-0.771895	9.87058e-173	0.122659	0.000289725	0.0145673	0.668045	0.767857	7.42137e-170
DYSF	turquoise	0.195198	6.55959e-09	-0.195198	6.55959e-09	-0.1044	0.00205904	-0.0661244	0.0513437	0.268434	8.2847e-16
COMMD1	turquoise	-0.817386	7.33546e-210	0.817386	7.33546e-210	-0.212589	2.44628e-10	-0.0049316	0.884577	-0.852577	1.4324e-246
CPVL	turquoise	-0.474173	6.40186e-50	0.474173	6.40186e-50	-0.0708413	0.0368037	0.0035196	0.917483	-0.516046	2.63139e-60
FXYD6	turquoise	-0.20508	1.04895e-09	0.20508	1.04895e-09	-0.278218	6.53008e-17	-0.10879	0.00131851	-0.162253	1.52416e-06
GTF2F1	turquoise	-0.807642	4.41862e-201	0.807642	4.41862e-201	-0.413956	2.66235e-37	-0.0508571	0.134129	-0.795829	4.34398e-191
FAM110A	turquoise	0.302755	7.03742e-20	-0.302755	7.03742e-20	-0.409187	2.08933e-36	-0.0223129	0.51125	0.366086	5.97052e-29
IRF2	turquoise	0.134732	6.77114e-05	-0.134732	6.77114e-05	0.0747647	0.0275323	-0.0191654	0.572609	0.187117	2.74121e-08
ANXA2	turquoise	-0.0342996	0.312518	0.0342996	0.312518	-0.131498	0.000101186	0.0664311	0.0502708	-0.0777854	0.0218368
LMO2	turquoise	0.75442	1.08456e-160	-0.75442	1.08456e-160	0.269355	6.55035e-16	-0.0643575	0.057905	0.744125	4.62412e-154
GNG3	turquoise	0.583669	1.7651e-80	-0.583669	1.7651e-80	0.0496961	0.143255	-0.0680821	0.0448115	0.586625	1.79583e-81
KIAA0408	turquoise	-0.723537	1.02569e-141	0.723537	1.02569e-141	-0.24592	1.94975e-13	-0.0476023	0.160905	-0.721776	1.03453e-140
MTFR1	turquoise	0.441664	8.5603e-43	-0.441664	8.5603e-43	0.58808	5.78235e-82	0.0449995	0.185074	0.399338	1.32583e-34
TMED3	turquoise	-0.656989	1.76039e-108	0.656989	1.76039e-108	-0.140533	3.21827e-05	0.0188092	0.579768	-0.696658	3.43728e-127
IRAK3	turquoise	-0.444604	2.08528e-43	0.444604	2.08528e-43	0.0449937	0.185131	-0.0594513	0.0798458	-0.421632	9.00312e-39
SLC27A4	turquoise	0.206305	8.30252e-10	-0.206305	8.30252e-10	-0.253683	3.14923e-14	0.00389707	0.90867	0.228427	9.46978e-12
ABHD6	turquoise	0.38331	8.49229e-32	-0.38331	8.49229e-32	0.159741	2.2164e-06	0.121358	0.00033632	0.380812	2.25232e-31
NUP160	turquoise	0.395063	7.69572e-34	-0.395063	7.69572e-34	0.407173	4.93774e-36	0.13512	6.44849e-05	0.357532	1.33965e-27
NGDN	turquoise	-0.901481	1.42903547403122e-317	0.901481	1.42903547403122e-317	-0.212172	2.65566e-10	0.0244539	0.471561	-0.920992	0
ZNF629	turquoise	0.0855887	0.011601	-0.0855887	0.011601	-0.269984	5.57745e-16	-0.0943075	0.00539796	0.114328	0.000734163
FNIP1	turquoise	0.225805	1.65e-11	-0.225805	1.65e-11	0.21382	1.91678e-10	-0.0208901	0.538557	0.271661	3.62508e-16
ZNF821	turquoise	0.175333	1.97684e-07	-0.175333	1.97684e-07	-0.103976	0.00214781	0.0468438	0.167689	0.18576	3.46459e-08
NAP1L3	turquoise	0.48308	5.19956e-52	-0.48308	5.19956e-52	0.50987	1.10726e-58	-0.035782	0.292052	0.426655	9.35621e-40
MICALCL	turquoise	0.46499	7.90221e-48	-0.46499	7.90221e-48	-0.112717	0.000872883	-0.0530005	0.118467	0.51807	7.59767e-61
TYMS	turquoise	-0.489109	1.84436e-53	0.489109	1.84436e-53	-0.0919056	0.00670587	0.0392419	0.247851	-0.503922	3.77575e-57
LIAS	turquoise	-0.268505	8.13596e-16	0.268505	8.13596e-16	0.0644151	0.0576803	0.0643663	0.0578704	-0.317618	8.05752e-22
BMP2K	turquoise	0.751518	8.64858e-159	-0.751518	8.64858e-159	0.38807	1.29332e-32	-0.0417215	0.219197	0.769321	6.82955e-171
THEG	turquoise	0.820324	1.301e-212	-0.820324	1.301e-212	0.150097	8.85069e-06	-0.00874822	0.796777	0.812256	3.56509e-205
ENTPD4	turquoise	0.173749	2.5526e-07	-0.173749	2.5526e-07	0.101399	0.00276669	-0.0102715	0.762374	0.176112	1.74163e-07
PPWD1	turquoise	-0.82153	9.33791e-214	0.82153	9.33791e-214	-0.00323627	0.924105	0.0824034	0.0151075	-0.835597	9.02182e-228
SLC12A1	turquoise	0.314911	1.85374e-21	-0.314911	1.85374e-21	0.00640807	0.850381	0.00110386	0.974078	0.328546	2.55541e-23
DDX28	turquoise	0.322767	1.61317e-22	-0.322767	1.61317e-22	0.037175	0.273659	-0.0377291	0.266567	0.314535	2.07988e-21
MATR3	turquoise	-0.376077	1.39795e-30	0.376077	1.39795e-30	-0.149979	8.99729e-06	0.0259814	0.444314	-0.40368	2.16415e-35
KCNN4	turquoise	-0.430269	1.7923e-40	0.430269	1.7923e-40	-0.364552	1.04995e-28	-0.0770453	0.0231282	-0.422072	7.39434e-39
FAM49B	turquoise	0.644554	3.46707e-103	-0.644554	3.46707e-103	0.266001	1.53387e-15	-0.016784	0.621238	0.64922	3.82475e-105
APP	turquoise	-0.558231	2.41574e-72	0.558231	2.41574e-72	-0.348448	3.28955e-26	-0.00387196	0.909256	-0.524438	1.4425e-62
ZNF540	turquoise	-0.157757	2.96724e-06	0.157757	2.96724e-06	0.383298	8.53239e-32	0.0116716	0.731161	-0.235186	2.19111e-12
NOTCH1	turquoise	-0.0323447	0.340914	0.0323447	0.340914	-0.139119	3.8689e-05	0.0212522	0.531539	0.0153887	0.650538
SLC30A7	turquoise	-0.835142	2.68516e-227	0.835142	2.68516e-227	-0.139732	3.57278e-05	0.018223	0.591639	-0.866973	1.82081e-264
ZNF33B	turquoise	-0.6475	2.03355e-104	0.6475	2.03355e-104	0.174775	2.1637e-07	0.0153805	0.650712	-0.693509	1.35755e-125
NGFRAP1	turquoise	-0.0992192	0.0034128	0.0992192	0.0034128	-0.0752798	0.026479	-0.132589	8.84575e-05	-0.11623	0.000596896
LPIN3	turquoise	0.789191	9.28955e-186	-0.789191	9.28955e-186	0.134005	7.41666e-05	-0.0110329	0.745348	0.780799	2.73384e-179
SULF1	turquoise	0.388073	1.29149e-32	-0.388073	1.29149e-32	-0.131268	0.000104095	-0.0527072	0.120522	0.401228	6.04424e-35
LOC441528	turquoise	-0.144622	1.87177e-05	0.144622	1.87177e-05	-0.110107	0.00114985	-0.0207168	0.541932	-0.165932	8.71798e-07
C17orf67	turquoise	-0.0421961	0.213996	0.0421961	0.213996	0.00692384	0.838498	0.00798597	0.814145	-0.0617094	0.0690282
KRT75	turquoise	0.744324	3.46576e-154	-0.744324	3.46576e-154	0.102724	0.00243063	-0.0231579	0.495381	0.727876	3.18578e-144
CHSY1	turquoise	0.765625	2.72468e-168	-0.765625	2.72468e-168	0.327443	3.64427e-23	0.02537	0.455111	0.774285	1.8358e-174
PTCH1	turquoise	-0.84558	1.50495e-238	0.84558	1.50495e-238	-0.186331	3.1402e-08	0.128972	0.00013763	-0.844306	3.9295e-237
GOLGA2	turquoise	0.169498	5.01312e-07	-0.169498	5.01312e-07	-0.443301	3.90716e-43	-0.0861568	0.0110577	0.245866	1.97413e-13
ZNF626	turquoise	0.193073	9.61194e-09	-0.193073	9.61194e-09	0.130774	0.000110581	-0.0479124	0.158193	0.161348	1.74551e-06
BMP3	turquoise	0.778934	6.85279e-178	-0.778934	6.85279e-178	0.137071	5.03412e-05	-0.0103189	0.761312	0.768523	2.5137e-170
EEF1E1	turquoise	-0.181237	7.46698e-08	0.181237	7.46698e-08	0.341158	3.98443e-25	0.0273861	0.42007	-0.250341	6.95621e-14
M6PR	turquoise	-0.439747	2.13414e-42	0.439747	2.13414e-42	-0.0936419	0.00573516	0.0683186	0.0440721	-0.487296	5.06839e-53
LYRM2	turquoise	-0.636839	5.04448e-100	0.636839	5.04448e-100	-0.0206228	0.543768	-0.00442476	0.896369	-0.677551	8.24629e-118
HEY2	turquoise	0.488766	2.23397e-53	-0.488766	2.23397e-53	-0.0584215	0.0852167	0.0307679	0.364983	0.486472	8.01092e-53
NPC2	turquoise	0.291278	1.86896e-18	-0.291278	1.86896e-18	0.0245698	0.469462	0.00054016	0.987314	0.313707	2.67777e-21
SAP30L	turquoise	0.149785	9.24322e-06	-0.149785	9.24322e-06	0.214241	1.7628e-10	-0.0890293	0.00864161	0.183551	5.05259e-08
ACOX3	turquoise	0.1465	1.45196e-05	-0.1465	1.45196e-05	-0.104402	0.00205864	0.00236753	0.944439	0.180156	8.94548e-08
H2AFJ	turquoise	0.350385	1.67712e-26	-0.350385	1.67712e-26	0.24573	2.03744e-13	-0.106677	0.00163738	0.357369	1.4197e-27
ARL11	turquoise	-0.666534	1.01828e-112	0.666534	1.01828e-112	-0.185912	3.37486e-08	-0.0618798	0.0682635	-0.61407	3.38473e-91
IGF2R	turquoise	0.235465	2.06052e-12	-0.235465	2.06052e-12	0.00363859	0.914704	0.0541835	0.110458	0.274084	1.93429e-16
PYGL	turquoise	0.496359	3.04065e-55	-0.496359	3.04065e-55	0.156538	3.54333e-06	-0.0734836	0.0303097	0.526469	4.00414e-63
VSIG4	turquoise	-0.788297	4.68658e-185	0.788297	4.68658e-185	-0.340985	4.22352e-25	-0.0271088	0.424794	-0.748869	4.46627e-157
TAF8	turquoise	0.112802	0.000865008	-0.112802	0.000865008	-0.129468	0.000129609	-0.0264428	0.436265	0.132937	8.47186e-05
MTPN	turquoise	0.877169	1.85271e-278	-0.877169	1.85271e-278	0.341496	3.55507e-25	0.0194937	0.566051	0.862303	1.93752e-258
NUMB	turquoise	0.742802	3.1161e-153	-0.742802	3.1161e-153	0.234022	2.8287e-12	0.0223978	0.509643	0.759711	3.15285e-164
NFIA	turquoise	0.146904	1.37436e-05	-0.146904	1.37436e-05	-0.186639	2.97762e-08	0.0448759	0.186284	0.17958	9.84453e-08
NEK6	turquoise	0.355851	2.44154e-27	-0.355851	2.44154e-27	0.134301	7.14706e-05	-0.000177868	0.995822	0.371422	8.17021e-30
ROPN1B	turquoise	0.31469	1.98374e-21	-0.31469	1.98374e-21	-0.0655284	0.0534837	-0.123837	0.000252789	0.329261	2.02924e-23
PFAS	turquoise	-0.0504755	0.137077	0.0504755	0.137077	-0.154607	4.68063e-06	-0.00903687	0.790225	-0.0796602	0.018842
IMPDH1	turquoise	0.223978	2.42033e-11	-0.223978	2.42033e-11	-0.229973	6.80184e-12	-0.0973125	0.00408729	0.298166	2.65851e-19
SPRY2	turquoise	0.648156	1.07619e-104	-0.648156	1.07619e-104	0.296104	4.7931e-19	0.10694	0.00159403	0.633151	1.52342e-98
SLC2A6	turquoise	0.427405	6.65054e-40	-0.427405	6.65054e-40	-0.129981	0.000121797	-0.0250403	0.460993	0.448729	2.80962e-44
SLC22A16	turquoise	-0.426139	1.1829e-39	0.426139	1.1829e-39	-0.0982063	0.00375735	-0.057784	0.0886852	-0.396056	5.12685e-34
MED30	turquoise	0.287694	5.05003e-18	-0.287694	5.05003e-18	0.385218	4.00806e-32	0.0353198	0.298335	0.278017	6.88639e-17
ZNF79	turquoise	-0.0242777	0.474761	0.0242777	0.474761	0.125394	0.000210733	0.0567024	0.0948288	-0.0658419	0.052349
TNFSF13	turquoise	0.337998	1.15093e-24	-0.337998	1.15093e-24	-0.227428	1.17088e-11	-0.0925442	0.00633293	0.397229	3.16765e-34
LAMA5	turquoise	-0.210457	3.71922e-10	0.210457	3.71922e-10	-0.184932	3.99297e-08	-0.101946	0.00262304	-0.209875	4.16611e-10
NCAM1	turquoise	0.508276	2.87057e-58	-0.508276	2.87057e-58	-0.0357003	0.293156	0.304057	4.80623e-20	0.520545	1.64438e-61
ARL16	turquoise	-0.50944	1.43204e-58	0.50944	1.43204e-58	-0.135285	6.31504e-05	-0.000579319	0.986394	-0.54669	7.03948e-69
APIP	turquoise	-0.84998	1.51727e-243	0.84998	1.51727e-243	0.0117968	0.72839	-0.0140095	0.68004	-0.872035	2.91573e-271
EIF2AK4	turquoise	-0.587106	1.23592e-81	0.587106	1.23592e-81	-0.108934	0.00129896	-0.0331501	0.329021	-0.600666	2.4939e-86
TNMD	turquoise	0.823209	2.31068e-215	-0.823209	2.31068e-215	0.151533	7.24014e-06	-0.00643631	0.849729	0.819678	5.29743e-212
MORF4L2	turquoise	-0.67637	2.96852e-117	0.67637	2.96852e-117	0.0710159	0.0363407	0.0858054	0.011391	-0.703841	6.53958e-131
SNRK	turquoise	0.767441	1.45744e-169	-0.767441	1.45744e-169	0.335992	2.24275e-24	0.0500455	0.140459	0.751892	4.93441e-159
ROBO3	turquoise	-0.584698	7.9871e-81	0.584698	7.9871e-81	-0.341859	3.14349e-25	-0.0193951	0.568016	-0.585996	2.92727e-81
SLC40A1	turquoise	0.663284	2.94076e-111	-0.663284	2.94076e-111	0.380889	2.1854e-31	-0.0813719	0.0164276	0.666398	1.17277e-112
EXOSC1	turquoise	-0.902298	4.64362419213271e-319	0.902298	4.64362419213271e-319	-0.22813	1.00867e-11	0.0123343	0.716536	-0.917583	0
WFIKKN1	turquoise	0.859078	2.09557e-254	-0.859078	2.09557e-254	0.121593	0.000327384	-0.0433646	0.201568	0.856574	2.42343e-251
BDP1	turquoise	-0.521363	9.88746e-62	0.521363	9.88746e-62	0.287098	5.94828e-18	0.0458774	0.176639	-0.574401	1.96758e-77
LYST	turquoise	0.587635	8.18427e-82	-0.587635	8.18427e-82	0.141077	2.99705e-05	0.00608812	0.85777	0.625181	2.05865e-95
TSPAN3	turquoise	-0.0196398	0.563142	0.0196398	0.563142	0.0195365	0.565198	0.136827	5.19361e-05	-0.0383655	0.258578
DENR	turquoise	-0.567251	3.79209e-75	0.567251	3.79209e-75	0.068377	0.0438909	0.0113174	0.739018	-0.613535	5.35145e-91
PTPRJ	turquoise	-0.309595	9.28571e-21	0.309595	9.28571e-21	-0.26202	4.14498e-15	0.0335711	0.322913	-0.246951	1.53584e-13
SLC45A4	turquoise	0.522557	4.69205e-62	-0.522557	4.69205e-62	-0.00732581	0.829262	-0.0342181	0.31367	0.583424	2.13157e-80
SCML4	turquoise	0.35886	8.3137e-28	-0.35886	8.3137e-28	-0.030241	0.373258	0.0562033	0.0977762	0.345131	1.03192e-25
HIST2H2BE	turquoise	0.735771	6.51401e-149	-0.735771	6.51401e-149	0.101246	0.00280823	-0.0352484	0.299313	0.775498	2.38461e-175
CASP1	turquoise	-0.737963	3.03446e-150	0.737963	3.03446e-150	-0.0546434	0.107462	-0.0196391	0.563156	-0.763769	5.29029e-167
GPKOW	turquoise	0.38162	1.64425e-31	-0.38162	1.64425e-31	-0.23959	8.23623e-13	0.0300869	0.375698	0.408364	2.97037e-36
DAPP1	turquoise	-0.388161	1.24704e-32	0.388161	1.24704e-32	-0.107268	0.00154173	-0.0359729	0.289484	-0.423172	4.51539e-39
ARHGEF10	turquoise	-0.109687	0.00120134	0.109687	0.00120134	-0.0577455	0.0888981	-0.0348372	0.30499	-0.12445	0.000235379
APOLD1	turquoise	0.467831	1.80901e-48	-0.467831	1.80901e-48	0.280805	3.27803e-17	-0.0669369	0.0485421	0.451506	7.17363e-45
CLEC10A	turquoise	0.0586872	0.0838042	-0.0586872	0.0838042	-0.125936	0.000197713	-0.0277583	0.413779	0.0651752	0.0547866
BTG1	turquoise	0.52229	5.54582e-62	-0.52229	5.54582e-62	0.162428	1.4847e-06	0.0697261	0.0398804	0.529832	4.70176e-64
SLC1A7	turquoise	-0.765934	1.65986e-168	0.765934	1.65986e-168	-0.253288	3.46051e-14	0.0944118	0.00534678	-0.75766	7.59176e-163
ATP11B	turquoise	0.690952	2.59375e-124	-0.690952	2.59375e-124	0.552346	1.46781e-70	0.0230902	0.496643	0.668749	1.00325e-113
PTTG1	turquoise	-0.156708	3.45661e-06	0.156708	3.45661e-06	0.0317814	0.349394	0.0401822	0.236692	-0.185223	3.79871e-08
CMPK1	turquoise	0.728481	1.41179e-144	-0.728481	1.41179e-144	0.587263	1.09324e-81	0.0359737	0.289474	0.67235	2.22455e-115
LMNB1	turquoise	-0.641382	7.10416e-102	0.641382	7.10416e-102	-0.0500045	0.140785	-0.0659006	0.0521386	-0.618705	6.18511e-93
KRTCAP3	turquoise	-0.794081	1.14935e-189	0.794081	1.14935e-189	-0.352888	6.97099e-27	-0.0593471	0.0803764	-0.769797	3.1356e-171
HCST	turquoise	-0.460071	9.82328e-47	0.460071	9.82328e-47	-0.201926	1.90227e-09	0.104695	0.00199919	-0.523872	2.0597e-62
RUNDC3B	turquoise	0.174977	2.09421e-07	-0.174977	2.09421e-07	-0.0738489	0.0294943	-0.042214	0.213801	0.17194	3.40867e-07
FCGR3B	turquoise	0.0289338	0.394279	-0.0289338	0.394279	0.048022	0.157241	-0.0202613	0.550854	0.0641889	0.0585657
UBIAD1	turquoise	0.215951	1.25208e-10	-0.215951	1.25208e-10	-0.105873	0.00177616	-0.0377669	0.266087	0.207435	6.68294e-10
ITCH	turquoise	0.223431	2.71249e-11	-0.223431	2.71249e-11	0.160105	2.10017e-06	0.0747312	0.0276021	0.245307	2.24599e-13
CHPF	turquoise	-0.89251	4.74251e-302	0.89251	4.74251e-302	-0.309349	9.99668e-21	-0.0442837	0.192169	-0.865871	5.04853e-263
GHDC	turquoise	-0.581002	1.36037e-79	0.581002	1.36037e-79	-0.448135	3.75606e-44	-0.0215231	0.526318	-0.567854	2.4456e-75
DCST1	turquoise	0.790933	3.87488e-187	-0.790933	3.87488e-187	0.147248	1.31126e-05	-0.0431922	0.203367	0.786786	7.10909e-184
MST4	turquoise	0.835347	1.6424e-227	-0.835347	1.6424e-227	0.461507	4.72724e-47	0.048351	0.154414	0.80769	4.01279e-201
CPT2	turquoise	0.0640385	0.0591604	-0.0640385	0.0591604	-0.241106	5.8549e-13	-0.0114868	0.735257	0.0947128	0.00520145
CLEC4A	turquoise	-0.282162	2.27739e-17	0.282162	2.27739e-17	0.347048	5.33827e-26	-0.139212	3.8221e-05	-0.338693	9.12442e-25
PRPF18	turquoise	-0.74314	1.9161e-153	0.74314	1.9161e-153	0.0364049	0.283728	-0.00553035	0.87068	-0.758655	1.62877e-163
RUSC1	turquoise	0.0299374	0.378076	-0.0299374	0.378076	-0.154257	4.92117e-06	0.0976918	0.0039442	0.00199132	0.953257
IDH2	turquoise	0.123271	0.000269933	-0.123271	0.000269933	-0.373568	3.63264e-30	0.0964272	0.00443977	0.160936	1.85606e-06
PARD6B	turquoise	-0.467534	2.11256e-48	0.467534	2.11256e-48	0.367499	3.53878e-29	-0.0357815	0.292059	-0.502146	1.0688e-56
ULK2	turquoise	0.528647	1.00272e-63	-0.528647	1.00272e-63	0.364774	9.68033e-29	0.0223472	0.510601	0.486672	7.16989e-53
KCNV1	turquoise	0.0732336	0.0308789	-0.0732336	0.0308789	-0.26048	6.06077e-15	-0.0602791	0.0757306	0.0844751	0.012735
CMBL	turquoise	-0.454046	2.03476e-45	0.454046	2.03476e-45	-0.320928	2.87612e-22	-0.0297932	0.380379	-0.412978	4.07195e-37
JAZF1	turquoise	0.826334	2.12245e-218	-0.826334	2.12245e-218	0.215463	1.38097e-10	0.0467405	0.168629	0.848788	3.54787e-242
KIAA0753	turquoise	0.673481	6.65064e-116	-0.673481	6.65064e-116	0.36114	3.64826e-28	0.0105172	0.756868	0.66197	1.13092e-110
C9orf114	turquoise	0.0365782	0.28144	-0.0365782	0.28144	-0.106232	0.00171283	0.0332044	0.328229	0.00327876	0.923111
TTLL12	turquoise	0.418606	3.45805e-38	-0.418606	3.45805e-38	-0.354403	4.0821e-27	-0.00628928	0.853123	0.467145	2.58598e-48
OTP	turquoise	0.802222	2.0619e-196	-0.802222	2.0619e-196	0.155986	3.83786e-06	0.00609759	0.857551	0.800195	1.05413e-194
LONRF1	turquoise	0.605318	5.41755e-88	-0.605318	5.41755e-88	0.509778	1.16998e-58	0.0181195	0.593746	0.595888	1.19369e-84
KIF21A	turquoise	0.107222	0.00154886	-0.107222	0.00154886	0.124872	0.000224039	0.264873	2.03601e-15	0.0672878	0.0473723
FBXO34	turquoise	0.315918	1.36138e-21	-0.315918	1.36138e-21	0.457243	4.10636e-46	0.0616235	0.0694165	0.302113	8.48974e-20
EIF4B	turquoise	-0.579101	5.76526e-79	0.579101	5.76526e-79	-0.107616	0.00148771	0.0864807	0.0107582	-0.620497	1.29265e-93
PTPRM	turquoise	-0.321944	2.09083e-22	0.321944	2.09083e-22	0.0234417	0.490111	0.171922	3.41856e-07	-0.34035	5.23183e-25
SAC3D1	turquoise	-0.295338	5.95902e-19	0.295338	5.95902e-19	-0.169886	4.71689e-07	-0.0024038	0.943589	-0.304597	4.10053e-20
GNG2	turquoise	0.805333	4.4877e-199	-0.805333	4.4877e-199	0.370316	1.2377e-29	0.0860412	0.0111664	0.797663	1.35005e-192
BAX	turquoise	-0.855341	7.44153e-250	0.855341	7.44153e-250	-0.375967	1.45801e-30	-0.0218472	0.520108	-0.843828	1.3265e-236
CKAP4	turquoise	-0.0275498	0.417296	0.0275498	0.417296	-0.191369	1.30171e-08	-0.118635	0.000457328	0.0259961	0.444057
DLD	turquoise	-0.223151	2.87516e-11	0.223151	2.87516e-11	0.426921	8.29208e-40	-0.0246592	0.467846	-0.283538	1.57048e-17
PREX1	turquoise	0.779574	2.27442e-178	-0.779574	2.27442e-178	0.0542156	0.110246	0.0179176	0.597866	0.816371	6.36757e-209
PPA2	turquoise	-0.626233	8.04872e-96	0.626233	8.04872e-96	-0.0977193	0.00393402	0.00626661	0.853646	-0.664319	1.01207e-111
LOC401442	turquoise	0.776873	2.32085e-176	-0.776873	2.32085e-176	0.142443	2.50303e-05	-0.00862588	0.799558	0.764253	2.44809e-167
LOC727820	turquoise	0.196269	5.40196e-09	-0.196269	5.40196e-09	-0.175416	1.95043e-07	0.15828	2.74839e-06	0.210531	3.66566e-10
UNC13B	turquoise	0.760551	8.48328e-165	-0.760551	8.48328e-165	0.0810329	0.016883	-0.0373891	0.270904	0.76244	4.35354e-166
UBE2H	turquoise	0.815602	3.25033e-208	-0.815602	3.25033e-208	0.11596	0.000614797	-0.0113911	0.737382	0.837871	3.66715e-230
SLC5A3	turquoise	-0.244334	2.80869e-13	0.244334	2.80869e-13	0.284081	1.35584e-17	0.0353616	0.297763	-0.292854	1.20203e-18
KIF13B	turquoise	0.136031	5.74691e-05	-0.136031	5.74691e-05	-0.272806	2.69624e-16	0.0746436	0.0277851	0.154084	5.04385e-06
C6orf48	turquoise	-0.850914	1.25595e-244	0.850914	1.25595e-244	-0.118434	0.000467704	-0.000176074	0.995865	-0.88691	4.81001e-293
DOK4	turquoise	-0.130986	0.000107754	0.130986	0.000107754	-0.152976	5.9057e-06	-0.0590588	0.0818595	-0.0834875	0.0138216
CCR4	turquoise	-0.858555	9.26249e-254	0.858555	9.26249e-254	-0.249801	7.89783e-14	0.00374836	0.912141	-0.841985	1.3946e-234
CRYGS	turquoise	0.299298	1.91961e-19	-0.299298	1.91961e-19	-0.0304374	0.370159	0.146898	1.3755e-05	0.274405	1.77912e-16
YRDC	turquoise	-0.0663866	0.0504252	0.0663866	0.0504252	0.222392	3.36551e-11	0.0267005	0.431806	-0.104906	0.00195752
NCAPG2	turquoise	-0.0299808	0.377384	0.0299808	0.377384	0.0580342	0.0873106	0.147381	1.28755e-05	-0.0486495	0.151883
ITGA9	turquoise	0.319681	4.24671e-22	-0.319681	4.24671e-22	-0.113995	0.000761051	-0.0527508	0.120214	0.349132	2.59487e-26
AFF1	turquoise	0.355886	2.41107e-27	-0.355886	2.41107e-27	-0.289329	3.21479e-18	0.0252334	0.457543	0.426123	1.19122e-39
IL2RB	turquoise	0.138331	4.28296e-05	-0.138331	4.28296e-05	-0.150743	8.08731e-06	0.309785	8.77314e-21	0.136357	5.51364e-05
ZNF208	turquoise	0.348118	3.68856e-26	-0.348118	3.68856e-26	-0.132187	9.29549e-05	-0.0552009	0.103917	0.353194	6.258e-27
LAMC1	turquoise	-0.267102	1.16166e-15	0.267102	1.16166e-15	-0.0337479	0.32037	-0.0787088	0.0203137	-0.280218	3.83592e-17
ATXN3	turquoise	-0.878653	1.34037e-280	0.878653	1.34037e-280	-0.175258	2.00106e-07	-0.0218196	0.520634	-0.892132	1.99716e-301
TBC1D8	turquoise	0.397675	2.63628e-34	-0.397675	2.63628e-34	0.0650302	0.0553291	0.0595251	0.0794718	0.434828	2.16432e-41
CEP350	turquoise	0.127596	0.000162344	-0.127596	0.000162344	0.238029	1.16782e-12	0.0875954	0.00978151	0.117469	0.00052068
NAALADL1	turquoise	0.056015	0.0989076	-0.056015	0.0989076	-0.0298108	0.380098	0.0212341	0.531889	0.0428049	0.207454
AMFR	turquoise	0.0166918	0.623158	-0.0166918	0.623158	-0.0203653	0.548811	0.022874	0.500682	0.0240745	0.478467
CALR	turquoise	-0.780786	2.79362e-179	0.780786	2.79362e-179	-0.330683	1.27981e-23	0.00608171	0.857918	-0.786787	7.09485e-184
FCRLB	turquoise	0.0514801	0.12942	-0.0514801	0.12942	0.0785744	0.0205294	0.235519	2.03609e-12	0.043427	0.200919
LGI2	turquoise	0.794116	1.0773e-189	-0.794116	1.0773e-189	0.122419	0.000297808	-0.0331665	0.328781	0.780664	3.45419e-179
MYO10	turquoise	0.108936	0.00129878	-0.108936	0.00129878	-0.208896	5.03955e-10	-0.0727662	0.0319675	0.132984	8.42252e-05
NUDT13	turquoise	0.674838	1.5506e-116	-0.674838	1.5506e-116	0.313183	3.14157e-21	-0.00812327	0.81101	0.649826	2.11657e-105
RTN1	turquoise	0.128138	0.000152151	-0.128138	0.000152151	-0.095567	0.00480834	0.0377325	0.266523	0.159985	2.13794e-06
EXOC6	turquoise	0.481658	1.13216e-51	-0.481658	1.13216e-51	0.4889	2.07273e-53	-0.0636996	0.060519	0.487419	4.73308e-53
LRRC61	turquoise	0.446026	1.04829e-43	-0.446026	1.04829e-43	-0.139542	3.66203e-05	-0.0515852	0.128639	0.478401	6.63274e-51
METTL5	turquoise	-0.745026	1.25159e-154	0.745026	1.25159e-154	-0.0251883	0.458348	0.0330161	0.330981	-0.798319	3.86709e-193
RAD9A	turquoise	0.336132	2.14074e-24	-0.336132	2.14074e-24	-0.408467	2.84344e-36	0.0366952	0.279903	0.364722	9.86649e-29
FLYWCH2	turquoise	0.324044	1.07756e-22	-0.324044	1.07756e-22	-0.262666	3.53121e-15	-0.0301139	0.375269	0.363685	1.4431e-28
CIRH1A	turquoise	0.106182	0.00172159	-0.106182	0.00172159	-0.160143	2.08818e-06	0.0439559	0.195483	0.0766008	0.0239352
ASCC1	turquoise	-0.920791	0	0.920791	0	-0.18706	2.7686e-08	-0.0265889	0.433733	-0.934717	0
PARP9	turquoise	-0.11385	0.000773014	0.11385	0.000773014	-0.16189	1.60959e-06	-0.0388083	0.253119	-0.0979043	0.00386604
QDPR	turquoise	0.255261	2.15737e-14	-0.255261	2.15737e-14	-0.00685222	0.840146	0.084521	0.0126864	0.226033	1.57292e-11
PELI1	turquoise	0.79139	1.67332e-187	-0.79139	1.67332e-187	0.31891	5.39847e-22	0.0276819	0.415066	0.799383	5.03328e-194
AOAH	turquoise	0.105295	0.00188264	-0.105295	0.00188264	-0.353507	5.6053e-27	-0.0248553	0.464313	0.174595	2.22764e-07
CCR1	turquoise	0.4929	2.18225e-54	-0.4929	2.18225e-54	0.102397	0.0025099	-0.0667882	0.0490451	0.523749	2.22506e-62
EIF2A	turquoise	-0.747572	3.02797e-156	0.747572	3.02797e-156	0.128071	0.00015338	0.0243637	0.473199	-0.806015	1.15518e-199
PLK3	turquoise	0.204229	1.23285e-09	-0.204229	1.23285e-09	-0.228032	1.02988e-11	-0.171656	3.56638e-07	0.243474	3.41942e-13
HK2	turquoise	0.425097	1.89625e-39	-0.425097	1.89625e-39	0.31813	6.87653e-22	-0.0590412	0.0819509	0.447688	4.67175e-44
RNF150	turquoise	-0.623975	6.01696e-95	0.623975	6.01696e-95	-0.347684	4.28648e-26	-0.0659627	0.0519172	-0.596312	8.49074e-85
GIGYF1	turquoise	-0.914377	0	0.914377	0	-0.438402	4.03651e-42	-0.039226	0.248043	-0.880597	1.9082e-283
SASH1	turquoise	-0.284393	1.2456e-17	0.284393	1.2456e-17	-0.109576	0.00121529	-0.0539366	0.112093	-0.275495	1.33825e-16
MAF1	turquoise	0.512885	1.80054e-59	-0.512885	1.80054e-59	-0.221736	3.85492e-11	-0.0353576	0.297817	0.566822	5.1785e-75
TIMM13	turquoise	0.396706	3.92759e-34	-0.396706	3.92759e-34	0.0160399	0.636794	-0.0501581	0.139568	0.393652	1.36719e-33
PEAR1	turquoise	0.475176	3.75021e-50	-0.475176	3.75021e-50	-0.132844	8.56985e-05	0.00304325	0.928619	0.530379	3.30922e-64
PRRG2	turquoise	0.773351	8.75808e-174	-0.773351	8.75808e-174	0.156228	3.7059e-06	-0.0139969	0.680311	0.760039	1.89112e-164
PRKX	turquoise	0.159013	2.46783e-06	-0.159013	2.46783e-06	0.098337	0.0037112	0.0477457	0.159646	0.147832	1.21037e-05
PTPRK	turquoise	0.304498	4.22215e-20	-0.304498	4.22215e-20	0.472465	1.58561e-49	-0.111281	0.00101647	0.252501	4.17307e-14
HLA-DRA	turquoise	-0.240866	6.18058e-13	0.240866	6.18058e-13	-0.0150394	0.657961	0.0274956	0.418214	-0.303384	5.85453e-20
NFKBIE	turquoise	0.551999	1.86513e-70	-0.551999	1.86513e-70	-0.0950475	0.00504411	-0.0535134	0.114941	0.564388	3.00773e-74
PDYN	turquoise	0.805871	1.53831e-199	-0.805871	1.53831e-199	0.16671	7.73391e-07	-0.0143597	0.6725	0.800695	4.01619e-195
RXRG	turquoise	0.786469	1.25442e-183	-0.786469	1.25442e-183	0.118495	0.00046457	-0.0253771	0.454985	0.789985	2.18996e-186
PDK3	turquoise	0.057614	0.0896294	-0.057614	0.0896294	-0.142344	2.53619e-05	-0.0414636	0.222062	0.125427	0.00020992
RECQL	turquoise	-0.79817	5.13734e-193	0.79817	5.13734e-193	0.196945	4.77599e-09	-0.0142936	0.67392	-0.842976	1.15025e-235
PPA1	turquoise	-0.436283	1.09512e-41	0.436283	1.09512e-41	0.188365	2.20715e-08	0.0108182	0.750138	-0.531424	1.69064e-64
STC1	turquoise	0.352477	8.05638e-27	-0.352477	8.05638e-27	-0.185975	3.33858e-08	-0.054696	0.107123	0.362731	2.04528e-28
HOXD11	turquoise	0.79931	5.79951e-194	-0.79931	5.79951e-194	0.142745	2.40499e-05	-0.0082892	0.807224	0.798141	5.43049e-193
YBX1	turquoise	0.634098	6.37551e-99	-0.634098	6.37551e-99	0.189294	1.87612e-08	-0.0314719	0.354109	0.623632	8.1584e-95
CXCR4	turquoise	-0.306694	2.20685e-20	0.306694	2.20685e-20	-0.106518	0.00166402	0.0330288	0.330795	-0.305908	2.7857e-20
TMEM119	turquoise	-0.750341	5.01847e-158	0.750341	5.01847e-158	-0.262726	3.47905e-15	-0.0302583	0.372984	-0.727432	5.78491e-144
ACADM	turquoise	-0.455318	1.07867e-45	0.455318	1.07867e-45	0.507527	4.48422e-58	0.0119289	0.725472	-0.526126	4.9751e-63
CYP26A1	turquoise	0.814137	7.08722e-207	-0.814137	7.08722e-207	0.120586	0.000367185	-0.0225351	0.507051	0.825216	2.63255e-217
ZHX2	turquoise	0.386714	2.21746e-32	-0.386714	2.21746e-32	-0.265298	1.8303e-15	-0.00399083	0.906483	0.414827	1.82064e-37
PROP1	turquoise	0.77433	1.70151e-174	-0.77433	1.70151e-174	0.135732	5.96867e-05	-0.0037198	0.912808	0.777208	1.31264e-176
DDX50	turquoise	-0.832885	5.7386e-225	0.832885	5.7386e-225	-0.076229	0.0246289	0.0161076	0.635372	-0.876226	4.10856e-277
MBNL1	turquoise	0.799055	9.45903e-194	-0.799055	9.45903e-194	0.44582	1.15828e-43	0.0481802	0.155877	0.758741	1.42592e-163
ERO1L	turquoise	0.647509	2.01569e-104	-0.647509	2.01569e-104	0.457484	3.63701e-46	-0.0166993	0.623001	0.639686	3.51739e-101
VPS18	turquoise	0.203811	1.33432e-09	-0.203811	1.33432e-09	-0.471777	2.28154e-49	-0.0782494	0.0210595	0.28101	3.10311e-17
ARHGAP27	turquoise	0.179114	1.0636e-07	-0.179114	1.0636e-07	-0.274731	1.63417e-16	-0.0785022	0.0206462	0.256532	1.58775e-14
TSPAN32	turquoise	0.0924603	0.00638083	-0.0924603	0.00638083	-0.231104	5.33189e-12	0.157904	2.9038e-06	0.0897354	0.00812511
PARP1	turquoise	-0.0433939	0.201263	0.0433939	0.201263	-0.149449	9.68424e-06	0.145241	1.72208e-05	-0.0800459	0.0182726
TMCC3	turquoise	0.292229	1.4325e-18	-0.292229	1.4325e-18	0.173838	2.51646e-07	-0.0636633	0.0606663	0.34599	7.68413e-26
PLD1	turquoise	0.351467	1.14859e-26	-0.351467	1.14859e-26	0.00824889	0.808144	-0.0363917	0.283903	0.395056	7.71632e-34
ICAM3	turquoise	0.516468	2.03168e-60	-0.516468	2.03168e-60	0.100486	0.00302236	0.0128374	0.705504	0.532361	9.23968e-65
LSG1	turquoise	0.184396	4.37631e-08	-0.184396	4.37631e-08	-0.208431	5.51474e-10	0.0454911	0.180315	0.187117	2.74122e-08
CDK10	turquoise	-0.852507	1.72937e-246	0.852507	1.72937e-246	-0.370685	1.07786e-29	0.00565928	0.867693	-0.850711	2.1651e-244
PINK1	turquoise	0.64544	1.48242e-103	-0.64544	1.48242e-103	-0.102583	0.00246454	-0.0746616	0.0277474	0.719287	2.6363e-139
CD5	turquoise	-0.68936	1.60334e-123	0.68936	1.60334e-123	-0.326109	5.58581e-23	0.0280579	0.408756	-0.713883	2.63905e-136
PIK3CB	turquoise	-0.069183	0.0414561	0.069183	0.0414561	0.00431348	0.898961	0.0590348	0.081984	-0.0557225	0.100685
ITM2C	turquoise	-0.480868	1.74167e-51	0.480868	1.74167e-51	-0.274792	1.6083e-16	0.0302706	0.372789	-0.497052	2.04387e-55
ADIPOQ	turquoise	-0.924113	0	0.924113	0	-0.293799	9.21019e-19	-0.0325268	0.338202	-0.893536	9.38039e-304
CHCHD2	turquoise	-0.309546	9.42405e-21	0.309546	9.42405e-21	0.0279695	0.410234	0.00918645	0.786836	-0.382297	1.2627e-31
SH3PXD2A	turquoise	0.483587	3.93714e-52	-0.483587	3.93714e-52	0.0150581	0.657563	0.0427349	0.208198	0.46659	3.45041e-48
PSIP1	turquoise	0.464598	9.67403e-48	-0.464598	9.67403e-48	0.524332	1.54177e-62	0.0286143	0.399523	0.419305	2.53695e-38
GP9	turquoise	0.520155	2.0947e-61	-0.520155	2.0947e-61	0.103588	0.00223199	-0.0858549	0.0113435	0.51661	1.8631e-60
CDC5L	turquoise	-0.736048	4.42991e-149	0.736048	4.42991e-149	-0.035797	0.29185	-0.0114634	0.735776	-0.75102	1.8227e-158
AFG3L2	turquoise	0.134692	6.80462e-05	-0.134692	6.80462e-05	-0.0153663	0.651014	0.0842576	0.0129676	0.110642	0.00108717
TRIM22	turquoise	-0.398582	1.81268e-34	0.398582	1.81268e-34	0.167621	6.7181e-07	0.0794988	0.019085	-0.447152	6.06495e-44
RAB36	turquoise	0.286282	7.4417e-18	-0.286282	7.4417e-18	-0.0569688	0.0932852	-0.0681248	0.0446772	0.336429	1.93978e-24
CTSO	turquoise	0.506005	1.10577e-57	-0.506005	1.10577e-57	0.438446	3.95295e-42	0.0895833	0.008234	0.466699	3.26044e-48
N4BP2	turquoise	-0.717774	1.8526e-138	0.717774	1.8526e-138	-0.00509924	0.880682	-0.00742261	0.827041	-0.751938	4.6043e-159
RRAGD	turquoise	0.473836	7.65954e-50	-0.473836	7.65954e-50	0.310591	6.8834e-21	-0.12016	0.000385301	0.491182	5.75858e-54
AHNAK	turquoise	0.112902	0.00085576	-0.112902	0.00085576	-0.154452	4.78525e-06	0.207715	6.33289e-10	0.118689	0.000454608
UPF1	turquoise	0.564796	2.24127e-74	-0.564796	2.24127e-74	-0.300606	1.31525e-19	-0.0273531	0.420631	0.643489	9.59869e-103
FNDC3A	turquoise	0.699023	2.10671e-128	-0.699023	2.10671e-128	0.485381	1.46561e-52	0.0614013	0.0704296	0.681301	1.35496e-119
TSPAN7	turquoise	0.467035	2.73835e-48	-0.467035	2.73835e-48	0.0513773	0.130188	-0.0315728	0.352568	0.503431	5.03897e-57
B3GNT8	turquoise	0.113239	0.000825482	-0.113239	0.000825482	-0.241674	5.14845e-13	-0.122577	0.000292477	0.186308	3.15276e-08
ZNF337	turquoise	0.0101991	0.764	-0.0101991	0.764	0.00349546	0.918047	0.103596	0.00223032	-0.0416788	0.219669
CSF2RA	turquoise	-0.62607	9.31212e-96	0.62607	9.31212e-96	-0.196073	5.59801e-09	-0.0571198	0.092419	-0.634033	6.77152e-99
ITFG3	turquoise	0.323505	1.27784e-22	-0.323505	1.27784e-22	-0.412694	4.60683e-37	-0.0802889	0.0179214	0.37368	3.48174e-30
NRSN2	turquoise	-0.297739	3.0049e-19	0.297739	3.0049e-19	-0.235603	1.99903e-12	-0.11573	0.000630438	-0.282129	2.29751e-17
TRIB1	turquoise	0.827491	1.53726e-219	-0.827491	1.53726e-219	0.248482	1.07576e-13	-0.0042294	0.90092	0.835348	1.63981e-227
RBBP6	turquoise	-0.937174	0	0.937174	0	-0.128451	0.000146532	0.00232298	0.945483	-0.937658	0
C19orf10	turquoise	0.0534317	0.115497	-0.0534317	0.115497	-0.0880066	0.00944167	0.118708	0.00045363	0.0344788	0.309995
TMEM127	turquoise	0.187961	2.36773e-08	-0.187961	2.36773e-08	-0.422163	7.1008e-39	-0.119881	0.000397637	0.287676	5.07413e-18
LRP3	turquoise	-0.745074	1.16655e-154	0.745074	1.16655e-154	-0.28018	3.87514e-17	-0.096036	0.00460408	-0.720627	4.63051e-140
ZMAT2	turquoise	-0.319401	4.63334e-22	0.319401	4.63334e-22	0.01875	0.580961	-0.105207	0.00189931	-0.361498	3.20354e-28
RUNX2	turquoise	0.584572	8.80382e-81	-0.584572	8.80382e-81	0.433033	4.99523e-41	-0.0516996	0.127792	0.54128	2.6648e-67
ATP1B3	turquoise	0.0818368	0.0158206	-0.0818368	0.0158206	0.0941244	0.00548887	0.196877	4.8358e-09	0.0514456	0.129677
SEC61G	turquoise	-0.777442	8.80132e-177	0.777442	8.80132e-177	-0.160605	1.94976e-06	0.0235666	0.487801	-0.80419	4.3256e-198
DOCK9	turquoise	-0.174959	2.1001e-07	0.174959	2.1001e-07	0.103922	0.00215942	0.0856772	0.0115148	-0.209973	4.08723e-10
LIPF	turquoise	0.788331	4.40621e-185	-0.788331	4.40621e-185	0.152901	5.96825e-06	0.00017741	0.995833	0.797303	2.67552e-192
BCL2L2	turquoise	0.563861	4.39357e-74	-0.563861	4.39357e-74	0.257045	1.4024e-14	0.0261814	0.440815	0.56364	5.15121e-74
WDR60	turquoise	-0.499254	5.74184e-56	0.499254	5.74184e-56	-0.135297	6.30591e-05	0.0587936	0.0832433	-0.523468	2.6525e-62
TAPT1	turquoise	0.730408	1.0409e-145	-0.730408	1.0409e-145	0.506047	1.07859e-57	-0.0670494	0.0481643	0.697943	7.56597e-128
C2orf16	turquoise	0.750986	1.91777e-158	-0.750986	1.91777e-158	0.150895	7.91722e-06	0.0242458	0.475343	0.735704	7.15247e-149
LRP10	turquoise	0.740224	1.24093e-151	-0.740224	1.24093e-151	0.134902	6.62796e-05	-0.0119532	0.724935	0.753614	3.68385e-160
BTLA	turquoise	-0.308713	1.20937e-20	0.308713	1.20937e-20	0.293601	9.74118e-19	-0.0680813	0.0448141	-0.372252	5.9766e-30
LHFP	turquoise	0.601031	1.8517e-86	-0.601031	1.8517e-86	0.0927693	0.00620597	-0.0754644	0.02611	0.615887	7.10593e-92
SELL	turquoise	0.297747	2.99774e-19	-0.297747	2.99774e-19	0.0627984	0.0642583	0.00216338	0.949223	0.318732	5.70458e-22
GEMIN6	turquoise	-0.430987	1.28739e-40	0.430987	1.28739e-40	0.170193	4.49448e-07	-0.0690434	0.0418694	-0.490383	9.02894e-54
HAPLN2	turquoise	0.802641	9.08103e-197	-0.802641	9.08103e-197	0.133033	8.37146e-05	0.00452319	0.894077	0.807648	4.36788e-201
NLRX1	turquoise	0.227395	1.17925e-11	-0.227395	1.17925e-11	-0.357719	1.25246e-27	-0.0887574	0.00884823	0.316601	1.10319e-21
KIAA0319L	turquoise	0.127856	0.000157376	-0.127856	0.000157376	-0.386505	2.4094e-32	-0.166517	7.96731e-07	0.221089	4.40539e-11
METTL2B	turquoise	0.0586895	0.0837918	-0.0586895	0.0837918	-0.133907	7.50815e-05	-0.0503169	0.138317	0.0391252	0.249262
POLR3B	turquoise	0.335745	2.43398e-24	-0.335745	2.43398e-24	0.420652	1.39379e-38	0.0465107	0.170734	0.30088	1.21488e-19
PAXIP1	turquoise	-0.0449939	0.185129	0.0449939	0.185129	0.0032236	0.924401	0.107408	0.00151975	-0.0580133	0.0874247
PLXNB2	turquoise	0.399755	1.11513e-34	-0.399755	1.11513e-34	-0.335964	2.26328e-24	-0.0778893	0.0216605	0.448966	2.50161e-44
ITGB3BP	turquoise	0.320943	2.862e-22	-0.320943	2.862e-22	0.472385	1.6536e-49	0.0316606	0.35123	0.275404	1.37042e-16
NSUN6	turquoise	0.0766496	0.0238455	-0.0766496	0.0238455	-0.0854219	0.0117649	0.134335	7.11704e-05	0.0475391	0.161462
PRTFDC1	turquoise	0.637478	2.78124e-100	-0.637478	2.78124e-100	0.200742	2.37287e-09	-0.0124814	0.713304	0.631087	1.00556e-97
CKS1B	turquoise	-0.735376	1.12898e-148	0.735376	1.12898e-148	-0.0442598	0.192409	-0.0529208	0.119023	-0.766101	1.26813e-168
ZDHHC8	turquoise	-0.729823	2.30462e-145	0.729823	2.30462e-145	-0.191223	1.33586e-08	0.0854709	0.0117166	-0.755953	1.04737e-161
ZNF543	turquoise	0.321666	2.28149e-22	-0.321666	2.28149e-22	0.249433	8.61001e-14	0.026237	0.439846	0.290615	2.24874e-18
PRMT6	turquoise	0.555469	1.67647e-71	-0.555469	1.67647e-71	0.532508	8.40124e-65	0.0425019	0.210692	0.509311	1.54713e-58
BPESC1	turquoise	0.784757	2.64417e-182	-0.784757	2.64417e-182	0.119076	0.000435316	0.00376873	0.911665	0.785085	1.4775e-182
MARCKS	turquoise	0.596174	9.48169e-85	-0.596174	9.48169e-85	0.190637	1.4816e-08	0.00908731	0.789082	0.618099	1.04783e-92
APPL1	turquoise	0.495287	5.6136e-55	-0.495287	5.6136e-55	0.478371	6.74177e-51	0.0784681	0.0207015	0.46434	1.10528e-47
ELOF1	turquoise	0.501737	1.35752e-56	-0.501737	1.35752e-56	-0.227944	1.0494e-11	-0.0261689	0.441033	0.546386	8.65194e-69
KMO	turquoise	0.362471	2.24852e-28	-0.362471	2.24852e-28	0.487188	5.38124e-53	-0.101495	0.00274089	0.306544	2.30731e-20
RALB	turquoise	0.715836	2.21278e-137	-0.715836	2.21278e-137	0.195725	5.96342e-09	0.00973493	0.774443	0.739643	2.83318e-151
EXTL3	turquoise	0.611437	3.19171e-90	-0.611437	3.19171e-90	-0.0859536	0.0112494	-0.0434488	0.200693	0.671324	6.62387e-115
TRAPPC6A	turquoise	-0.1843	4.44805e-08	0.1843	4.44805e-08	-0.213984	1.85511e-10	0.0382303	0.260261	-0.221887	3.73644e-11
HSDL1	turquoise	0.445458	1.38049e-43	-0.445458	1.38049e-43	0.469051	9.56416e-49	0.00102016	0.976043	0.419874	1.97038e-38
CENPB	turquoise	-0.760089	1.74874e-164	0.760089	1.74874e-164	-0.260604	5.879e-15	0.0320234	0.345734	-0.790519	8.26421e-187
COMMD10	turquoise	-0.162424	1.48558e-06	0.162424	1.48558e-06	0.434279	2.79695e-41	-0.0350936	0.301442	-0.23441	2.59838e-12
BTF3	turquoise	-0.69198	7.95376e-125	0.69198	7.95376e-125	-0.147228	1.31474e-05	0.0598761	0.0777121	-0.731839	1.47984e-146
MYOM1	turquoise	0.0594	0.0801068	-0.0594	0.0801068	-0.0320949	0.344658	-0.0746273	0.0278194	0.0677984	0.0457125
TMEM9	turquoise	0.27077	4.55887e-16	-0.27077	4.55887e-16	0.0331086	0.329627	-0.00224921	0.947212	0.268819	7.51093e-16
C14orf169	turquoise	0.0865533	0.010692	-0.0865533	0.010692	-0.0617799	0.0687111	0.194645	7.24911e-09	0.0662979	0.0507345
PXK	turquoise	0.0359682	0.289547	-0.0359682	0.289547	0.0201029	0.553974	0.0148098	0.662857	0.0860659	0.0111431
SP4	turquoise	0.673977	3.91115e-116	-0.673977	3.91115e-116	0.542792	9.7196e-68	0.127846	0.000157564	0.625243	1.94836e-95
TMEM97	turquoise	0.1414	2.87275e-05	-0.1414	2.87275e-05	0.134303	7.145e-05	0.0881292	0.0093424	0.105132	0.00191368
CRISPLD2	turquoise	-0.109899	0.00117505	0.109899	0.00117505	-0.190591	1.49369e-08	-0.013139	0.698918	-0.0610968	0.071837
NEIL2	turquoise	0.232811	3.6841e-12	-0.232811	3.6841e-12	-0.235742	1.9386e-12	0.042497	0.210743	0.242623	4.15116e-13
TJP3	turquoise	-0.194446	7.51278e-09	0.194446	7.51278e-09	-0.272903	2.62923e-16	-0.0115861	0.733056	-0.214809	1.57408e-10
SSX2IP	turquoise	0.647515	2.0038e-104	-0.647515	2.0038e-104	0.544715	2.67249e-68	0.0114713	0.7356	0.605514	4.60327e-88
ARHGAP21	turquoise	0.674223	3.00173e-116	-0.674223	3.00173e-116	0.279085	5.18722e-17	0.0123804	0.715524	0.670451	1.66889e-114
NLN	turquoise	0.401968	4.43646e-35	-0.401968	4.43646e-35	-0.00540686	0.873543	-0.0454927	0.180299	0.413488	3.26319e-37
SOX14	turquoise	0.758835	1.23168e-163	-0.758835	1.23168e-163	0.142534	2.47332e-05	-0.0161931	0.633579	0.750398	4.61407e-158
PCSK1N	turquoise	0.0597241	0.0784701	-0.0597241	0.0784701	-0.158971	2.4831e-06	-0.157329	3.15848e-06	0.0989261	0.00350943
CLTC	turquoise	0.696408	4.61176e-127	-0.696408	4.61176e-127	0.20868	5.25471e-10	0.0198579	0.558815	0.698894	2.45382e-128
FRAT1	turquoise	0.800693	4.02874e-195	-0.800693	4.02874e-195	0.0827931	0.0146336	-0.0524243	0.12253	0.842097	1.05371e-234
SPRR1A	turquoise	0.629185	5.65133e-97	-0.629185	5.65133e-97	0.00691478	0.838706	-0.0242776	0.474763	0.632216	3.58617e-98
JOSD2	turquoise	-0.329618	1.8076e-23	0.329618	1.8076e-23	-0.475359	3.39971e-50	-0.0322495	0.342339	-0.312675	3.6659e-21
TMSB4Y	turquoise	0.41672	7.9435e-38	-0.41672	7.9435e-38	0.0824763	0.0150178	-0.0652351	0.0545639	0.432819	5.51635e-41
RPL7L1	turquoise	-0.538474	1.71001e-66	0.538474	1.71001e-66	-0.166249	8.30333e-07	0.0151871	0.654819	-0.571121	2.2343e-76
PDIA6	turquoise	0.140262	3.33453e-05	-0.140262	3.33453e-05	0.231168	5.25896e-12	0.17533	1.97774e-07	0.120836	0.000356904
LRG1	turquoise	0.559007	1.39669e-72	-0.559007	1.39669e-72	-0.0034775	0.918467	-0.0308837	0.363181	0.611319	3.52937e-90
CBX3	turquoise	-0.631651	6.01067e-98	0.631651	6.01067e-98	0.094135	0.00548357	-0.0146428	0.666428	-0.669886	3.03185e-114
FAIM3	turquoise	-0.339773	6.35174e-25	0.339773	6.35174e-25	-0.176662	1.59223e-07	0.0806688	0.0173845	-0.398262	2.06884e-34
LOXL3	turquoise	0.536756	5.29083e-66	-0.536756	5.29083e-66	-0.142008	2.65136e-05	-0.0579227	0.0879212	0.58212	5.7936e-80
CORO1A	turquoise	0.619355	3.51071e-93	-0.619355	3.51071e-93	0.10267	0.00244351	0.0147568	0.66399	0.636149	9.56961e-100
HSD17B7	turquoise	-0.508096	3.19509e-58	0.508096	3.19509e-58	-0.17002	4.61856e-07	0.0387606	0.253704	-0.53861	1.56331e-66
TRPC4	turquoise	0.774177	2.1997e-174	-0.774177	2.1997e-174	0.116811	0.00055992	0.00623769	0.854314	0.76772	9.26549e-170
ZNF333	turquoise	0.427725	5.74706e-40	-0.427725	5.74706e-40	0.105598	0.0018262	-0.059904	0.0775737	0.460894	6.46117e-47
CHRAC1	turquoise	0.335433	2.69842e-24	-0.335433	2.69842e-24	-0.106957	0.00159136	0.0123964	0.715172	0.362533	2.19801e-28
MYOZ1	turquoise	0.786571	1.04447e-183	-0.786571	1.04447e-183	0.127951	0.000155596	-0.0048871	0.885611	0.789137	1.02382e-185
RELB	turquoise	0.440585	1.43224e-42	-0.440585	1.43224e-42	-0.178417	1.19354e-07	-0.175817	1.82732e-07	0.498051	1.15024e-55
ST6GALNAC1	turquoise	0.14656	1.44021e-05	-0.14656	1.44021e-05	0.123665	0.000257892	-0.0320353	0.345555	0.122488	0.000295471
NEU1	turquoise	0.295331	5.9707e-19	-0.295331	5.9707e-19	-0.118401	0.000469444	-0.0285068	0.401296	0.359862	5.79411e-28
RNASE4	turquoise	0.155288	4.24435e-06	-0.155288	4.24435e-06	0.29058	2.27093e-18	-0.136155	5.65698e-05	0.1571	3.26548e-06
TACC3	turquoise	0.787188	3.45862e-184	-0.787188	3.45862e-184	-0.0271038	0.42488	-0.0363029	0.28508	0.818844	3.21076e-211
PDLIM1	turquoise	0.424184	2.86388e-39	-0.424184	2.86388e-39	-0.279627	4.49053e-17	-0.0152344	0.653814	0.468622	1.19734e-48
DNAJC5	turquoise	0.295911	5.06332e-19	-0.295911	5.06332e-19	-0.395599	6.18254e-34	-0.0795148	0.0190608	0.387127	1.88248e-32
IAH1	turquoise	-0.829229	2.87728e-221	0.829229	2.87728e-221	-0.019921	0.557567	0.00392017	0.908131	-0.866374	1.11327e-263
TTC14	turquoise	-0.734357	4.6353e-148	0.734357	4.6353e-148	0.0745782	0.0279226	0.0626057	0.0650821	-0.782592	1.19925e-180
RNF113A	turquoise	0.166091	8.5078e-07	-0.166091	8.5078e-07	-0.157144	3.24436e-06	0.0398012	0.24117	0.160115	2.09715e-06
ZNF160	turquoise	-0.830903	5.9658e-223	0.830903	5.9658e-223	-0.31165	5.00102e-21	0.0124825	0.71328	-0.825156	3.01073e-217
CALB2	turquoise	0.802954	4.92442e-197	-0.802954	4.92442e-197	0.131049	0.000106916	-0.00480785	0.887454	0.801419	9.84877e-196
RNF39	turquoise	0.769025	1.10735e-170	-0.769025	1.10735e-170	0.136342	5.52409e-05	-0.0120759	0.722226	0.769422	5.7865e-171
EAF2	turquoise	-0.282435	2.11557e-17	0.282435	2.11557e-17	0.297503	3.21516e-19	-0.0681832	0.0444942	-0.340544	4.90043e-25
ADORA3	turquoise	-0.13968	3.59728e-05	0.13968	3.59728e-05	-0.141007	3.02478e-05	-0.062647	0.0649048	-0.142554	2.46654e-05
PRMT5	turquoise	0.0888491	0.00877802	-0.0888491	0.00877802	-0.127582	0.000162619	-0.148361	1.12558e-05	0.112499	0.000893393
CCDC136	turquoise	0.0667253	0.0492591	-0.0667253	0.0492591	-0.111544	0.000988673	0.17906	1.07322e-07	0.0483685	0.154265
MXI1	turquoise	0.575656	7.70951e-78	-0.575656	7.70951e-78	0.0719531	0.0339396	-0.00874583	0.796831	0.618017	1.12572e-92
DCLRE1C	turquoise	-0.618589	6.84069e-93	0.618589	6.84069e-93	-0.0732822	0.0307674	0.00663456	0.845158	-0.644244	4.66609e-103
SIPA1L3	turquoise	0.318873	5.45987e-22	-0.318873	5.45987e-22	-0.177729	1.33678e-07	-0.0829528	0.0144433	0.348083	3.7335e-26
ZNF335	turquoise	0.278524	6.02048e-17	-0.278524	6.02048e-17	-0.434416	2.62382e-41	0.101734	0.00267806	0.310562	6.9447e-21
NUDT16	turquoise	0.264758	2.09565e-15	-0.264758	2.09565e-15	-0.0227509	0.502992	-0.122686	0.000288806	0.308616	1.245e-20
MAD2L1BP	turquoise	0.283726	1.49279e-17	-0.283726	1.49279e-17	0.347196	5.07218e-26	-0.121865	0.000317369	0.254767	2.42895e-14
TSC22D4	turquoise	0.349402	2.36181e-26	-0.349402	2.36181e-26	-0.394632	9.17532e-34	-0.083672	0.0136126	0.423666	3.61542e-39
TTC30A	turquoise	-0.118731	0.000452492	0.118731	0.000452492	-0.00805967	0.812462	-0.0866746	0.0105823	-0.10822	0.0013983
ZRANB1	turquoise	0.50076	2.39749e-56	-0.50076	2.39749e-56	0.393694	1.34432e-33	-0.0607716	0.0733655	0.514023	9.03192e-60
C1orf56	turquoise	-0.817661	4.07652e-210	0.817661	4.07652e-210	-0.260883	5.48914e-15	0.014829	0.662448	-0.783519	2.35222e-181
RABGAP1L	turquoise	-0.10698	0.00158757	0.10698	0.00158757	0.162772	1.4098e-06	0.0859741	0.0112299	-0.126298	0.00018944
PLD2	turquoise	0.336658	1.79775e-24	-0.336658	1.79775e-24	-0.33121	1.07844e-23	-0.0543751	0.109202	0.366872	4.46441e-29
ZNF559	turquoise	-0.253268	3.47656e-14	0.253268	3.47656e-14	0.324195	1.02716e-22	-0.001695	0.960206	-0.321364	2.50884e-22
TLR5	turquoise	-0.662936	4.20512e-111	0.662936	4.20512e-111	-0.216401	1.14384e-10	-0.0957547	0.00472561	-0.643973	6.04531e-103
POR	turquoise	0.718139	1.15918e-138	-0.718139	1.15918e-138	-0.0429538	0.205875	-0.0718032	0.0343143	0.752698	1.46946e-159
TPM1	turquoise	0.357122	1.5509e-27	-0.357122	1.5509e-27	-0.0733293	0.03066	-0.0052299	0.877649	0.419581	2.24456e-38
NINJ1	turquoise	0.697169	1.88425e-127	-0.697169	1.88425e-127	0.170843	4.05634e-07	0.011446	0.736162	0.707297	9.65785e-133
IGBP1	turquoise	-0.806147	8.86897e-200	0.806147	8.86897e-200	-0.0467478	0.168562	-0.0685563	0.043339	-0.848663	4.92641e-242
GADD45B	turquoise	0.210424	3.74284e-10	-0.210424	3.74284e-10	-0.135682	6.0066e-05	-0.058624	0.0841381	0.264167	2.4299e-15
PHLDB1	turquoise	0.348203	3.58078e-26	-0.348203	3.58078e-26	-0.0344769	0.310022	-0.108031	0.00142575	0.351863	9.99801e-27
TNIP1	turquoise	0.793312	4.80732e-189	-0.793312	4.80732e-189	0.143591	2.14882e-05	-0.0152398	0.653698	0.807721	3.77038e-201
CEBPB	turquoise	0.560712	4.17182e-73	-0.560712	4.17182e-73	0.131149	0.000105613	0.0196144	0.563647	0.580796	1.59225e-79
SRGAP1	turquoise	0.290122	2.57962e-18	-0.290122	2.57962e-18	-0.169455	5.04723e-07	-0.0668546	0.0488197	0.305589	3.06097e-20
LOC150051	turquoise	0.782278	2.07911e-180	-0.782278	2.07911e-180	0.138765	4.05016e-05	-0.00108583	0.974502	0.770898	5.1233e-172
B3GALT6	turquoise	0.0869724	0.0103172	-0.0869724	0.0103172	0.0102589	0.762657	-0.000990325	0.976744	0.0766778	0.0237936
CYP4V2	turquoise	-0.305931	2.76686e-20	0.305931	2.76686e-20	0.36453	1.05879e-28	0.160868	1.87509e-06	-0.370867	1.00657e-29
EIF4A2	turquoise	-0.723737	7.87754e-142	0.723737	7.87754e-142	-0.113705	0.000785216	0.0803409	0.0178471	-0.767133	2.39944e-169
IFIH1	turquoise	-0.124625	0.000230613	0.124625	0.000230613	0.336288	2.0327e-24	-0.0155775	0.646541	-0.167099	7.28276e-07
SLC27A1	turquoise	0.203748	1.3502e-09	-0.203748	1.3502e-09	-0.408168	3.2303e-36	0.00634506	0.851835	0.248137	1.16583e-13
SPAG7	turquoise	-0.318108	6.92411e-22	0.318108	6.92411e-22	-0.0524797	0.122134	-0.121591	0.000327465	-0.365175	8.35306e-29
AVIL	turquoise	0.367443	3.61269e-29	-0.367443	3.61269e-29	-0.0996146	0.00328629	-0.0827525	0.0146823	0.422397	6.39186e-39
UBB	turquoise	0.202082	1.84762e-09	-0.202082	1.84762e-09	0.0164217	0.628792	-0.0309926	0.361491	0.229372	7.73713e-12
KLF12	turquoise	-0.159484	2.30234e-06	0.159484	2.30234e-06	0.160301	2.03997e-06	0.264803	2.07193e-15	-0.232706	3.76897e-12
GNGT2	turquoise	0.267315	1.10051e-15	-0.267315	1.10051e-15	0.0318497	0.348359	0.177302	1.43392e-07	0.261794	4.38347e-15
DDX3Y	turquoise	0.113083	0.000839408	-0.113083	0.000839408	-0.00539704	0.873771	-0.0252015	0.458113	0.116809	0.000560041
TP53INP2	turquoise	0.658323	4.59815e-109	-0.658323	4.59815e-109	-0.00492504	0.88473	-0.0100899	0.766453	0.707775	5.36785e-133
TSPAN9	turquoise	0.717735	1.94911e-138	-0.717735	1.94911e-138	0.00248468	0.941695	-0.103035	0.00235744	0.741722	1.46583e-152
CCDC106	turquoise	-0.0953469	0.00490697	0.0953469	0.00490697	-0.139169	3.84346e-05	-0.0333852	0.3256	-0.100975	0.00288302
PRKDC	turquoise	0.158147	2.80244e-06	-0.158147	2.80244e-06	-0.212891	2.30439e-10	0.0262948	0.438838	0.21742	9.31234e-11
CLN6	turquoise	0.220299	5.18155e-11	-0.220299	5.18155e-11	-0.18794	2.37636e-08	-0.0454214	0.180984	0.256639	1.5472e-14
DNAJC9	turquoise	-0.900502	8.30570209832382e-316	0.900502	8.30570209832382e-316	-0.130383	0.000115984	0.0315106	0.353517	-0.923552	0
ACTR3	turquoise	0.620804	9.87358e-94	-0.620804	9.87358e-94	0.481075	1.55568e-51	-0.0137516	0.685613	0.576396	4.42844e-78
RAB24	turquoise	0.131832	9.7115e-05	-0.131832	9.7115e-05	-0.254972	2.31227e-14	-0.17996	9.24182e-08	0.199853	2.79868e-09
ZNF827	turquoise	-0.852025	6.3554e-246	0.852025	6.3554e-246	-0.310042	8.12047e-21	0.0889927	0.00866916	-0.854077	2.4099e-248
MNDA	turquoise	-0.163153	1.33097e-06	0.163153	1.33097e-06	0.0583445	0.0856301	0.0102672	0.762471	-0.194551	7.37271e-09
KIAA0232	turquoise	0.500783	2.36573e-56	-0.500783	2.36573e-56	0.56409	3.72675e-74	0.0181326	0.593478	0.511295	4.70338e-59
RASSF2	turquoise	0.830048	4.33504e-222	-0.830048	4.33504e-222	0.258531	9.77023e-15	0.0162267	0.632872	0.834604	9.70181e-227
ABHD4	turquoise	0.558143	2.57016e-72	-0.558143	2.57016e-72	-0.18777	2.44796e-08	-0.071435	0.0352498	0.631159	9.41841e-98
TTC16	turquoise	-0.0720289	0.0337516	0.0720289	0.0337516	-0.14318	2.26983e-05	0.30045	1.37633e-19	-0.0863475	0.0108805
FCHO1	turquoise	0.6808	2.354e-119	-0.6808	2.354e-119	-0.232311	4.10649e-12	-0.0785188	0.0206194	0.732989	3.05784e-147
CAPN11	turquoise	0.81376	1.55933e-206	-0.81376	1.55933e-206	0.120358	0.00037676	-0.0236366	0.486509	0.818056	1.74926e-210
C9orf38	turquoise	0.0527468	0.120243	-0.0527468	0.120243	-0.115137	0.000672578	0.0471558	0.164873	0.0539362	0.112096
APOBEC3B	turquoise	0.191659	1.23651e-08	-0.191659	1.23651e-08	0.0602546	0.0758502	-0.0431624	0.20368	0.199174	3.17284e-09
TIAM1	turquoise	-0.514915	5.24883e-60	0.514915	5.24883e-60	-0.170419	4.33728e-07	-0.016406	0.629121	-0.542768	9.876e-68
SSBP1	turquoise	-0.743073	2.10978e-153	0.743073	2.10978e-153	-0.0957763	0.00471618	0.0121377	0.720865	-0.788484	3.34469e-185
VN1R2	turquoise	0.767286	1.87273e-169	-0.767286	1.87273e-169	0.122846	0.000283536	-0.00570409	0.866655	0.767972	6.15568e-170
IL1RN	turquoise	0.372332	5.79784e-30	-0.372332	5.79784e-30	-0.0947716	0.00517352	-0.105397	0.00186349	0.448682	2.87407e-44
ABCB1	turquoise	0.154299	4.89161e-06	-0.154299	4.89161e-06	0.200371	2.54226e-09	0.385616	3.42572e-32	0.120714	0.000361891
DHRS12	turquoise	0.129363	0.000131279	-0.129363	0.000131279	-0.259933	6.93311e-15	-0.162855	1.39219e-06	0.199618	2.92313e-09
IRF1	turquoise	0.352738	7.35018e-27	-0.352738	7.35018e-27	0.0923555	0.00644115	0.0516905	0.127859	0.354075	4.58581e-27
COX4I1	turquoise	-0.664407	9.23526e-112	0.664407	9.23526e-112	-0.158098	2.82252e-06	0.00144913	0.965975	-0.711752	3.85068e-135
ARMC6	turquoise	0.370295	1.2474e-29	-0.370295	1.2474e-29	-0.269711	5.98098e-16	-0.0314999	0.353681	0.404318	1.65422e-35
PGAM1	turquoise	-0.00282032	0.933835	0.00282032	0.933835	0.00705837	0.835404	0.0603538	0.0753682	0.0288055	0.396379
MAST2	turquoise	0.246522	1.69673e-13	-0.246522	1.69673e-13	-0.347876	4.01023e-26	0.0207731	0.540834	0.292387	1.3703e-18
NDUFA8	turquoise	-0.790884	4.23271e-187	0.790884	4.23271e-187	-0.118298	0.000474885	-0.0260392	0.443301	-0.834863	5.2348e-227
RIOK3	turquoise	0.815337	5.68197e-208	-0.815337	5.68197e-208	0.218702	7.17988e-11	-0.00411478	0.903592	0.829561	1.3363e-221
TM4SF1	turquoise	0.749352	2.18364e-157	-0.749352	2.18364e-157	0.0430789	0.204557	-0.0288791	0.395173	0.753491	4.43977e-160
C10orf2	turquoise	0.328894	2.2843e-23	-0.328894	2.2843e-23	0.06875	0.0427497	-0.0412768	0.224154	0.301944	8.91605e-20
ATG9B	turquoise	0.344054	1.49104e-25	-0.344054	1.49104e-25	-0.0683089	0.0441022	-0.104645	0.00200933	0.319513	4.47392e-22
ADCY4	turquoise	0.194643	7.25063e-09	-0.194643	7.25063e-09	-0.353896	4.88456e-27	-0.122501	0.000295029	0.272687	2.78035e-16
PICALM	turquoise	0.797087	4.02951e-192	-0.797087	4.02951e-192	0.287227	5.74147e-18	0.0247842	0.465593	0.813998	9.48288e-207
SCRT1	turquoise	0.785155	1.30319e-182	-0.785155	1.30319e-182	0.118351	0.000472102	-0.0330323	0.330744	0.78206	3.04207e-180
NFIL3	turquoise	0.449592	1.84029e-44	-0.449592	1.84029e-44	0.272679	2.78662e-16	-0.0906775	0.00747897	0.498328	9.80448e-56
MTR	turquoise	0.497025	2.07542e-55	-0.497025	2.07542e-55	0.595838	1.24195e-84	0.0668469	0.048846	0.436865	8.33286e-42
TFEB	turquoise	0.461209	5.50305e-47	-0.461209	5.50305e-47	-0.207658	6.4028e-10	-0.111322	0.00101215	0.536835	5.023e-66
NPHP3	turquoise	-0.473303	1.01664e-49	0.473303	1.01664e-49	0.168731	5.65215e-07	0.0752753	0.0264881	-0.493601	1.46643e-54
STX11	turquoise	0.744477	2.77706e-154	-0.744477	2.77706e-154	0.242551	4.21921e-13	0.0128682	0.70483	0.750565	3.59748e-158
MT2A	turquoise	0.261575	4.62747e-15	-0.261575	4.62747e-15	-0.0458643	0.176763	-0.0191602	0.572713	0.264077	2.48507e-15
TOP1P2	turquoise	0.912054	0	-0.912054	0	0.21079	3.48458e-10	-0.00524488	0.877301	0.902106	1.04526504296757e-318
RDX	turquoise	0.296942	3.77484e-19	-0.296942	3.77484e-19	0.209424	4.54868e-10	0.0145237	0.668982	0.277389	8.13071e-17
SPIN1	turquoise	-0.329318	1.9917e-23	0.329318	1.9917e-23	0.0613713	0.070567	0.0688179	0.0425444	-0.368502	2.43679e-29
ZNF185	turquoise	0.837172	2.01159e-229	-0.837172	2.01159e-229	0.215672	1.32417e-10	-0.0329002	0.332683	0.851727	1.42177e-245
ARMC9	turquoise	0.183853	4.8e-08	-0.183853	4.8e-08	-0.249658	8.1669e-14	-0.0609698	0.0724308	0.199862	2.79362e-09
MMP3	turquoise	0.776985	1.91793e-176	-0.776985	1.91793e-176	0.132623	8.80839e-05	-0.00682881	0.840685	0.777383	9.73605e-177
RASA2	turquoise	0.628259	1.30407e-96	-0.628259	1.30407e-96	0.495468	5.06216e-55	0.0647104	0.0565414	0.614809	1.7968e-91
PACSIN1	turquoise	0.347826	4.0809e-26	-0.347826	4.0809e-26	-0.204032	1.27959e-09	0.076923	0.0233478	0.382169	1.32698e-31
CAPG	turquoise	0.582898	3.19269e-80	-0.582898	3.19269e-80	-0.0925534	0.00632768	-0.084732	0.0124651	0.607714	7.35609e-89
ABLIM3	turquoise	0.34769	4.27644e-26	-0.34769	4.27644e-26	-0.228482	9.35741e-12	-0.0543514	0.109357	0.409509	1.81965e-36
CKS2	turquoise	-0.166913	7.4954e-07	0.166913	7.4954e-07	0.392283	2.38232e-33	-0.0330277	0.330811	-0.228549	9.2251e-12
PBX4	turquoise	0.250669	6.43943e-14	-0.250669	6.43943e-14	-0.199908	2.77014e-09	0.0685258	0.0434327	0.244516	2.69349e-13
TBC1D22B	turquoise	0.26198	4.18629e-15	-0.26198	4.18629e-15	-0.262611	3.58005e-15	0.0101261	0.76564	0.321223	2.62197e-22
CA5B	turquoise	-0.807419	6.92056e-201	0.807419	6.92056e-201	-0.0812159	0.0166358	0.0644453	0.0575631	-0.827992	4.90628e-220
FAM96B	turquoise	0.0480746	0.156787	-0.0480746	0.156787	0.0338653	0.318688	-0.0118717	0.726734	0.000555555	0.986952
CD36	turquoise	0.344871	1.12772e-25	-0.344871	1.12772e-25	0.314623	2.02448e-21	-0.0854461	0.0117411	0.332441	7.21756e-24
NT5E	turquoise	0.473299	1.01887e-49	-0.473299	1.01887e-49	0.380866	2.20507e-31	-0.0626792	0.0647668	0.429478	2.57792e-40
MRPL23	turquoise	-0.830994	4.82039e-223	0.830994	4.82039e-223	-0.234891	2.33791e-12	-0.0256071	0.450907	-0.855595	3.68505e-250
TBC1D2	turquoise	0.242977	3.82974e-13	-0.242977	3.82974e-13	-0.330992	1.15749e-23	-0.0682225	0.0443713	0.318218	6.69284e-22
CLIC1	turquoise	-0.413361	3.44861e-37	0.413361	3.44861e-37	0.000173989	0.995914	-0.0641887	0.0585664	-0.461933	3.80203e-47
FAM50B	turquoise	0.0155491	0.647142	-0.0155491	0.647142	0.0459244	0.176195	0.0739027	0.0293757	-0.0052317	0.877607
ATM	turquoise	0.271757	3.53584e-16	-0.271757	3.53584e-16	0.0981592	0.00377411	0.159189	2.40465e-06	0.264311	2.34392e-15
ATP7A	turquoise	0.445219	1.54948e-43	-0.445219	1.54948e-43	0.328704	2.42826e-23	0.0140258	0.679687	0.452096	5.35737e-45
PTCRA	turquoise	0.643777	7.29283e-103	-0.643777	7.29283e-103	-0.129619	0.000127263	-0.0824454	0.0150559	0.679318	1.19891e-118
IFI35	turquoise	-0.414505	2.095e-37	0.414505	2.095e-37	-0.395051	7.73241e-34	-0.0383523	0.258743	-0.428702	3.67832e-40
WDR61	turquoise	-0.879826	2.60391e-282	0.879826	2.60391e-282	-0.126233	0.000190894	0.00724916	0.831021	-0.902474	2.22033101241056e-319
COL5A3	turquoise	0.359937	5.63853e-28	-0.359937	5.63853e-28	-0.0913233	0.00706302	0.0859785	0.0112258	0.362269	2.42034e-28
HPSE	turquoise	0.477895	8.71577e-51	-0.477895	8.71577e-51	0.297405	3.30589e-19	-0.0750649	0.0269141	0.500265	3.19636e-56
PROK2	turquoise	0.363342	1.63607e-28	-0.363342	1.63607e-28	0.140022	3.44026e-05	0.0205331	0.545522	0.379564	3.65484e-31
CD6	turquoise	-0.616808	3.20894e-92	0.616808	3.20894e-92	-0.221759	3.83654e-11	0.0980484	0.00381383	-0.663901	1.55704e-111
MED13L	turquoise	0.298753	2.24572e-19	-0.298753	2.24572e-19	-0.181954	6.61861e-08	0.00214408	0.949676	0.360362	4.83695e-28
NAT6	turquoise	-0.148512	1.10236e-05	0.148512	1.10236e-05	-0.29207	1.49772e-18	0.00217399	0.948975	-0.163278	1.30616e-06
SBK1	turquoise	-0.259376	7.94771e-15	0.259376	7.94771e-15	-0.25746	1.2679e-14	0.238472	1.05779e-12	-0.281096	3.03284e-17
DAGLA	turquoise	0.765552	3.06376e-168	-0.765552	3.06376e-168	0.129216	0.000133636	0.0104995	0.757265	0.77504	5.15784e-175
ZNF14	turquoise	-0.278598	5.90466e-17	0.278598	5.90466e-17	0.224743	2.06239e-11	-0.0206882	0.542492	-0.341105	4.05682e-25
TTC17	turquoise	-0.917793	0	0.917793	0	-0.296152	4.72863e-19	0.00438001	0.897411	-0.91907	0
BBS1	turquoise	0.0537386	0.113418	-0.0537386	0.113418	-0.141968	2.66531e-05	-0.0368686	0.277635	0.0536301	0.114149
PADI4	turquoise	0.00438442	0.897309	-0.00438442	0.897309	-0.0959814	0.00462745	-0.0195433	0.565062	0.0680123	0.0450319
ZNF213	turquoise	0.701963	6.2928e-130	-0.701963	6.2928e-130	-0.178596	1.15879e-07	-0.0585297	0.0846393	0.753248	6.40683e-160
GSN	turquoise	0.535194	1.46933e-65	-0.535194	1.46933e-65	-0.362976	1.86981e-28	-0.0475751	0.161145	0.610649	6.22361e-90
MTF2	turquoise	-0.476912	1.479e-50	0.476912	1.479e-50	0.464871	8.40416e-48	-0.00605236	0.858596	-0.542689	1.04098e-67
SLC25A13	turquoise	0.45559	9.41255e-46	-0.45559	9.41255e-46	0.107842	0.00145369	0.0209113	0.538145	0.461777	4.11872e-47
WASL	turquoise	0.50499	2.01361e-57	-0.50499	2.01361e-57	0.548798	1.67788e-69	0.0836965	0.013585	0.467265	2.42979e-48
UFC1	turquoise	-0.808341	1.07708e-201	0.808341	1.07708e-201	-0.147179	1.32358e-05	0.00299072	0.929848	-0.856727	1.58247e-251
SPARC	turquoise	0.391304	3.53745e-33	-0.391304	3.53745e-33	-0.215727	1.3098e-10	-0.0465467	0.170404	0.461713	4.25481e-47
UPF3B	turquoise	-0.920518	0	0.920518	0	-0.045054	0.184542	0.0285501	0.400581	-0.934977	0
ATG10	turquoise	-0.6317	5.7489e-98	0.6317	5.7489e-98	-0.1414	2.8725e-05	-0.0542283	0.110163	-0.651052	6.37621e-106
TAAR8	turquoise	0.760343	1.17505e-164	-0.760343	1.17505e-164	0.145271	1.7152e-05	-0.00328482	0.92297	0.766094	1.28307e-168
TSPAN2	turquoise	0.495449	5.11828e-55	-0.495449	5.11828e-55	0.53003	4.14066e-64	-0.0343223	0.312197	0.496451	2.88404e-55
SPOCK2	turquoise	-0.0927664	0.00620758	0.0927664	0.00620758	-0.114314	0.000735302	0.113859	0.000772339	-0.0981981	0.00376028
RNF14	turquoise	0.702367	3.87491e-130	-0.702367	3.87491e-130	0.584721	7.84872e-81	0.04649	0.170925	0.675802	5.48276e-117
CHD8	turquoise	-0.809985	3.80498e-203	0.809985	3.80498e-203	-0.300667	1.29212e-19	-0.00959367	0.77763	-0.815802	2.13014e-208
FRY	turquoise	0.566368	7.19881e-75	-0.566368	7.19881e-75	0.138332	4.28259e-05	-0.0553274	0.103125	0.612674	1.11577e-90
MRPL39	turquoise	-0.776184	7.47067e-176	0.776184	7.47067e-176	0.0507238	0.135153	-0.0113937	0.737323	-0.818013	1.91484e-210
PRKAR1A	turquoise	0.692808	3.05859e-125	-0.692808	3.05859e-125	0.286418	7.1695e-18	0.0568669	0.0938734	0.675967	4.59119e-117
C3orf58	turquoise	0.787851	1.0477e-184	-0.787851	1.0477e-184	0.610621	6.37399e-90	0.0318513	0.348334	0.746416	1.64807e-155
PAQR7	turquoise	0.226772	1.34566e-11	-0.226772	1.34566e-11	-0.253013	3.69477e-14	-0.00657003	0.846646	0.255633	1.97249e-14
IFNGR2	turquoise	0.502311	9.70462e-57	-0.502311	9.70462e-57	0.145946	1.56548e-05	0.0274921	0.418273	0.526525	3.86345e-63
KLF2	turquoise	0.627312	3.05807e-96	-0.627312	3.05807e-96	0.123425	0.000265174	0.0282114	0.406196	0.642055	3.75296e-102
PAPSS2	turquoise	0.148017	1.18015e-05	-0.148017	1.18015e-05	0.185502	3.6216e-08	-0.0589409	0.0824725	0.171139	3.87118e-07
SESTD1	turquoise	-0.147635	1.24358e-05	0.147635	1.24358e-05	0.264613	2.17327e-15	-0.0603867	0.0752089	-0.170731	4.12917e-07
PADI2	turquoise	0.323465	1.29406e-22	-0.323465	1.29406e-22	-0.202652	1.6602e-09	-0.0594589	0.0798073	0.38503	4.3173e-32
KIAA1324L	turquoise	0.000597472	0.985968	-0.000597472	0.985968	0.0985752	0.00362838	0.0568075	0.0942176	-0.0325025	0.338562
PIK3R3	turquoise	0.450318	1.28796e-44	-0.450318	1.28796e-44	0.18631	3.15175e-08	0.151937	6.83981e-06	0.441172	1.08296e-42
NEXN	turquoise	-0.139806	3.53862e-05	0.139806	3.53862e-05	0.108545	0.00135226	-0.0623101	0.0663622	-0.139962	3.46742e-05
OXTR	turquoise	0.206466	8.05022e-10	-0.206466	8.05022e-10	-0.162729	1.41896e-06	0.00929115	0.784466	0.220407	5.06742e-11
TAL1	turquoise	0.620703	1.0791e-93	-0.620703	1.0791e-93	-0.0457545	0.177802	-0.0297307	0.381379	0.669604	4.0815e-114
PIAS4	turquoise	-0.830098	3.86102e-222	0.830098	3.86102e-222	-0.271252	4.02798e-16	-0.00914738	0.787721	-0.837187	1.94077e-229
SLC25A1	turquoise	0.537513	3.21922e-66	-0.537513	3.21922e-66	-0.258249	1.0466e-14	0.0306422	0.366946	0.571421	1.79066e-76
G3BP1	turquoise	0.400739	7.40797e-35	-0.400739	7.40797e-35	-0.00682843	0.840693	0.118255	0.000477132	0.389606	6.99968e-33
GPX7	turquoise	-0.204555	1.159e-09	0.204555	1.159e-09	0.216507	1.1197e-10	0.0373753	0.27108	-0.268546	8.05235e-16
ATP13A1	turquoise	-0.710441	1.97852e-134	0.710441	1.97852e-134	-0.4824	7.54647e-52	-0.0308983	0.362954	-0.703681	7.9374e-131
MAGEL2	turquoise	-0.238521	1.04628e-12	0.238521	1.04628e-12	-0.256247	1.70088e-14	-0.173337	2.72728e-07	-0.211071	3.29764e-10
ZXDC	turquoise	0.237708	1.25425e-12	-0.237708	1.25425e-12	0.0709001	0.0366471	0.0836761	0.0136079	0.272951	2.59649e-16
LYL1	turquoise	0.155161	4.32288e-06	-0.155161	4.32288e-06	-0.0537624	0.113259	-0.0776244	0.0221123	0.175282	1.9931e-07
ACOX1	turquoise	0.353495	5.62793e-27	-0.353495	5.62793e-27	0.0284495	0.402245	-0.0573233	0.0912616	0.421546	9.35533e-39
CDKN2AIPNL	turquoise	-0.574601	1.69433e-77	0.574601	1.69433e-77	-0.163631	1.23817e-06	4.26591e-05	0.998998	-0.60769	7.50725e-89
EID2B	turquoise	0.201105	2.21764e-09	-0.201105	2.21764e-09	0.210394	3.76511e-10	-0.0574407	0.0905996	0.173613	2.60893e-07
JAK1	turquoise	0.31709	9.48761e-22	-0.31709	9.48761e-22	-0.0526834	0.12069	0.121702	0.000323354	0.353773	5.10252e-27
GPR1	turquoise	-0.502431	9.04705e-57	0.502431	9.04705e-57	-0.111391	0.00100477	-0.0394253	0.245646	-0.529303	6.59529e-64
GLUL	turquoise	0.277586	7.71949e-17	-0.277586	7.71949e-17	-0.299506	1.80765e-19	-0.0930967	0.00602538	0.381524	1.70728e-31
RPL36	turquoise	-0.607516	8.68293e-89	0.607516	8.68293e-89	-0.171363	3.73616e-07	0.0141701	0.676578	-0.659832	9.99396e-110
RPL27A	turquoise	-0.452945	3.51811e-45	0.452945	3.51811e-45	-0.0784425	0.0207431	0.0569886	0.0931708	-0.527093	2.69581e-63
RGL4	turquoise	0.279554	4.57872e-17	-0.279554	4.57872e-17	0.0123795	0.715544	-0.137379	4.83977e-05	0.32463	8.94608e-23
LEF1	turquoise	-0.232762	3.72349e-12	0.232762	3.72349e-12	-0.108094	0.00141653	0.0672134	0.0476182	-0.283206	1.71829e-17
CD2AP	turquoise	0.681211	1.49659e-119	-0.681211	1.49659e-119	0.695313	1.66134e-126	0.0109728	0.746688	0.622406	2.41209e-94
C1RL	turquoise	0.0444425	0.190578	-0.0444425	0.190578	-0.0686196	0.0431458	-0.0710113	0.036353	0.0962873	0.00449789
COPS4	turquoise	-0.801127	1.73705e-195	0.801127	1.73705e-195	0.0139691	0.680912	-0.00309854	0.927326	-0.839374	9.22037e-232
ARF3	turquoise	0.882704	1.3793e-286	-0.882704	1.3793e-286	0.117769	0.000503655	0.00106108	0.975083	0.902312	4.39234240465785e-319
ZMYND19	turquoise	-0.921355	0	0.921355	0	-0.314232	2.28179e-21	0.0250966	0.459986	-0.916264	0
TMEM40	turquoise	0.404342	1.63761e-35	-0.404342	1.63761e-35	-0.0425616	0.21005	-0.0548954	0.105848	0.446571	8.04542e-44
WDR41	turquoise	-0.0652672	0.0544449	0.0652672	0.0544449	0.136481	5.42789e-05	0.0579693	0.0876657	-0.093729	0.00568997
DDIT4	turquoise	-0.0822682	0.0152751	0.0822682	0.0152751	-0.115044	0.000679391	0.197025	4.7073e-09	-0.0985502	0.00363699
EOMES	turquoise	-0.408001	3.46863e-36	0.408001	3.46863e-36	-0.224189	2.31573e-11	0.410313	1.28808e-36	-0.448347	3.38583e-44
HCLS1	turquoise	0.487086	5.69517e-53	-0.487086	5.69517e-53	0.0857082	0.0114849	0.00862188	0.799649	0.507599	4.29677e-58
ISOC2	turquoise	-0.382103	1.36214e-31	0.382103	1.36214e-31	-0.362649	2.1069e-28	0.0269352	0.427767	-0.375345	1.84876e-30
ZNF346	turquoise	-0.912969	0	0.912969	0	-0.379809	3.32384e-31	0.00266859	0.937388	-0.89467	1.17098e-305
BATF	turquoise	-0.811678	1.17706e-204	0.811678	1.17706e-204	-0.247045	1.50291e-13	0.0690571	0.0418286	-0.8261	3.60295e-218
PEG3	turquoise	0.15214	6.64716e-06	-0.15214	6.64716e-06	-0.209519	4.46525e-10	-0.0609203	0.072663	0.164132	1.14759e-06
ANXA2P1	turquoise	0.00921724	0.786139	-0.00921724	0.786139	0.0128751	0.704679	-0.0533619	0.115973	0.00424783	0.900491
EHD3	turquoise	0.454911	1.3216e-45	-0.454911	1.3216e-45	-0.193888	8.30553e-09	-0.00958307	0.777869	0.50068	2.51127e-56
STRN4	turquoise	0.299526	1.79769e-19	-0.299526	1.79769e-19	-0.392842	1.89919e-33	-0.158913	2.5045e-06	0.374149	2.91429e-30
ADAMTS17	turquoise	0.143647	2.13284e-05	-0.143647	2.13284e-05	0.103242	0.00230971	-0.0649593	0.0555963	0.124483	0.000234482
PDCD4	turquoise	-0.718084	1.24427e-138	0.718084	1.24427e-138	-0.139474	3.69478e-05	0.0147246	0.66468	-0.749742	1.22481e-157
TAF1B	turquoise	-0.793883	1.66286e-189	0.793883	1.66286e-189	0.0603291	0.0754876	0.0811571	0.0167149	-0.824118	3.06554e-216
TLR2	turquoise	-0.101414	0.0027627	0.101414	0.0027627	-0.144861	1.81263e-05	-0.0480402	0.157084	-0.0469976	0.166296
FAM104A	turquoise	0.688004	7.49013e-123	-0.688004	7.49013e-123	0.21589	1.2675e-10	-0.0274383	0.419185	0.688392	4.82617e-123
IPP	turquoise	-0.43562	1.4943e-41	0.43562	1.4943e-41	-0.24139	5.49095e-13	0.0294475	0.385933	-0.439506	2.39292e-42
TMEM51	turquoise	0.107386	0.00152322	-0.107386	0.00152322	-0.208312	5.64339e-10	0.0399011	0.23999	0.142502	2.48358e-05
PHKA2	turquoise	-0.85067	2.41247e-244	0.85067	2.41247e-244	-0.280357	3.69582e-17	-0.0338899	0.318337	-0.841554	4.1048e-234
PLCD3	turquoise	0.516636	1.83327e-60	-0.516636	1.83327e-60	-0.149614	9.4651e-06	-0.0193465	0.568986	0.528354	1.20873e-63
ZNF577	turquoise	0.154969	4.44374e-06	-0.154969	4.44374e-06	-0.117274	0.000532031	-0.0695523	0.0403792	0.163518	1.25957e-06
CFLAR	turquoise	-0.458746	1.92314e-46	0.458746	1.92314e-46	-0.201881	1.91831e-09	-0.00892792	0.792696	-0.46946	7.71958e-49
CBR3	turquoise	-0.155569	4.07625e-06	0.155569	4.07625e-06	-0.0493589	0.145993	-0.0878046	0.00960727	-0.18763	2.50808e-08
SHPK	turquoise	-0.00336011	0.92121	0.00336011	0.92121	-0.0466388	0.169558	0.111594	0.000983448	-0.0301123	0.375295
CD8B	turquoise	-0.200169	2.63937e-09	0.200169	2.63937e-09	-0.108022	0.00142715	0.0837542	0.0135204	-0.223478	2.68589e-11
TMEM39B	turquoise	0.0820261	0.0155792	-0.0820261	0.0155792	-0.24386	3.13004e-13	-0.0275945	0.416541	0.105111	0.00191778
ZDHHC18	turquoise	0.76123	2.92892e-165	-0.76123	2.92892e-165	0.126821	0.000178048	-0.00540423	0.873604	0.791266	2.10412e-187
RPL34	turquoise	-0.0885999	0.00896984	0.0885999	0.00896984	0.308384	1.33461e-20	-0.076848	0.0234833	-0.173331	2.7301e-07
SSB	turquoise	-0.888052	7.67523e-295	0.888052	7.67523e-295	-0.112304	0.000912165	-0.00299711	0.929698	-0.917925	0
LILRB1	turquoise	-0.503824	3.99941e-57	0.503824	3.99941e-57	-0.210812	3.46925e-10	-0.0281369	0.407437	-0.524475	1.40968e-62
RBMS2	turquoise	0.558601	1.86023e-72	-0.558601	1.86023e-72	-0.0732702	0.030795	0.000529099	0.987574	0.586193	2.5112e-81
CISH	turquoise	-0.176663	1.59193e-07	0.176663	1.59193e-07	-0.227977	1.04218e-11	-0.072069	0.0336524	-0.192227	1.1178e-08
CKAP5	turquoise	0.154032	5.08156e-06	-0.154032	5.08156e-06	-0.361794	2.87703e-28	0.0963316	0.00447942	0.176131	1.73631e-07
DTX3L	turquoise	-0.0209429	0.53753	0.0209429	0.53753	-0.0595281	0.0794569	-0.0503975	0.137686	0.00355461	0.916665
FLJ20712	turquoise	0.772455	3.89541e-173	-0.772455	3.89541e-173	0.130199	0.000118605	0.00271859	0.936217	0.78013	8.7164e-179
PTK2B	turquoise	0.178712	1.13674e-07	-0.178712	1.13674e-07	-0.425656	1.4722e-39	-0.101272	0.00280108	0.262372	3.79807e-15
SNX22	turquoise	0.413404	3.38464e-37	-0.413404	3.38464e-37	-0.0976742	0.00395075	-0.134803	6.71095e-05	0.419233	2.61889e-38
SCRN1	turquoise	0.403932	1.9464e-35	-0.403932	1.9464e-35	-0.18491	4.00785e-08	0.0867447	0.0105193	0.412302	5.4599e-37
S100A4	turquoise	0.240674	6.45425e-13	-0.240674	6.45425e-13	0.0646048	0.0569465	0.0195178	0.565571	0.254108	2.84446e-14
CAMK2N1	turquoise	-0.364023	1.27485e-28	0.364023	1.27485e-28	-0.16237	1.49758e-06	0.214194	1.77916e-10	-0.385195	4.04573e-32
PNPO	turquoise	0.276964	9.09495e-17	-0.276964	9.09495e-17	-0.0962815	0.00450034	-0.00146443	0.965616	0.277348	8.22007e-17
TXNDC12	turquoise	-0.681625	9.47439e-120	0.681625	9.47439e-120	-0.0723	0.0330858	0.00226734	0.946787	-0.715357	4.07206e-137
XBP1	turquoise	-0.131903	9.6276e-05	0.131903	9.6276e-05	-0.173139	2.81509e-07	0.161909	1.60501e-06	-0.166598	7.8692e-07
LSP1	turquoise	0.271877	3.42864e-16	-0.271877	3.42864e-16	-0.378695	5.11394e-31	-0.0536006	0.114349	0.356825	1.72482e-27
BRWD3	turquoise	0.466383	3.84197e-48	-0.466383	3.84197e-48	0.26597	1.54551e-15	-0.0666013	0.0496832	0.492227	3.19418e-54
CDCA7	turquoise	0.255659	1.9601e-14	-0.255659	1.9601e-14	0.337866	1.2026e-24	0.0779513	0.021556	0.222591	3.22972e-11
ECHDC2	turquoise	-0.733366	1.82093e-147	0.733366	1.82093e-147	-0.247507	1.34987e-13	0.0962188	0.00452664	-0.752546	1.84769e-159
OR11A1	turquoise	0.76049	9.34156e-165	-0.76049	9.34156e-165	0.112373	0.000905404	-0.0247607	0.466016	0.764098	3.13587e-167
RPAIN	turquoise	-0.912346	0	0.912346	0	-0.195864	5.81467e-09	0.0399754	0.239116	-0.936687	0
HIST1H2AE	turquoise	0.361925	2.74282e-28	-0.361925	2.74282e-28	-0.121638	0.000325733	-0.032675	0.336005	0.407589	4.13477e-36
SLC11A1	turquoise	0.0235656	0.487819	-0.0235656	0.487819	-0.148281	1.13796e-05	-0.0585303	0.0846362	0.0846861	0.012513
KRT83	turquoise	0.757106	1.78414e-162	-0.757106	1.78414e-162	0.124851	0.000224601	0.00318775	0.925239	0.761727	1.34053e-165
TRIB2	turquoise	-0.0192983	0.569951	0.0192983	0.569951	0.0689789	0.0420615	0.17042	4.33685e-07	-0.0816	0.0161273
PPAPDC1B	turquoise	0.231025	5.42469e-12	-0.231025	5.42469e-12	0.202796	1.61586e-09	-0.0578279	0.088443	0.19402	8.11105e-09
PWP1	turquoise	-0.899521	4.68480817632158e-314	0.899521	4.68480817632158e-314	-0.145856	1.58473e-05	0.0322936	0.341678	-0.930146	0
MLLT6	turquoise	-0.771	4.33622e-172	0.771	4.33622e-172	-0.255926	1.8381e-14	0.0890836	0.00860086	-0.798219	4.67592e-193
ADAM23	turquoise	-0.823047	3.30706e-215	0.823047	3.30706e-215	-0.102255	0.00254501	-0.0117374	0.729704	-0.822611	8.66098e-215
TBC1D9	turquoise	0.774187	2.16467e-174	-0.774187	2.16467e-174	0.431152	1.19332e-40	0.0441766	0.193247	0.758395	2.43832e-163
RHOF	turquoise	0.590061	1.22409e-82	-0.590061	1.22409e-82	-0.176306	1.68734e-07	0.117773	0.000503437	0.591848	2.98688e-83
FKBP11	turquoise	-0.818049	1.77559e-210	0.818049	1.77559e-210	-0.229963	6.81653e-12	0.0595268	0.0794631	-0.834354	1.76092e-226
PTMA	turquoise	0.130402	0.000115707	-0.130402	0.000115707	0.0942343	0.00543412	0.00681124	0.841089	0.1101	0.00115065
FKBP14	turquoise	-0.160955	1.85082e-06	0.160955	1.85082e-06	0.10789	0.00144654	0.0358062	0.291726	-0.202909	1.58165e-09
SIGLEC9	turquoise	-0.444566	2.12373e-43	0.444566	2.12373e-43	-0.390704	4.50273e-33	-0.0836852	0.0135978	-0.379047	4.46326e-31
ADRA1B	turquoise	0.772604	3.04155e-173	-0.772604	3.04155e-173	0.126181	0.000192076	-0.019538	0.565167	0.779349	3.3518e-178
TNFSF4	turquoise	0.487682	4.08867e-53	-0.487682	4.08867e-53	0.291347	1.83349e-18	-0.00754269	0.824289	0.516591	1.88428e-60
DGKA	turquoise	0.251866	4.85262e-14	-0.251866	4.85262e-14	-0.302865	6.81528e-20	-0.0776303	0.0221021	0.252551	4.12375e-14
TGFB2	turquoise	0.481853	1.01758e-51	-0.481853	1.01758e-51	-0.101369	0.00277474	-0.0770355	0.0231457	0.485952	1.06821e-52
BEX5	turquoise	-0.84696	4.23499e-240	0.84696	4.23499e-240	-0.0708437	0.0367972	-0.0657023	0.0528519	-0.859722	3.3415e-255
ZBP1	turquoise	-0.332197	7.81629e-24	0.332197	7.81629e-24	-0.276359	1.06674e-16	-0.0106942	0.752907	-0.331714	9.15127e-24
SCNN1B	turquoise	0.759773	2.86201e-164	-0.759773	2.86201e-164	0.132744	8.67707e-05	-0.0102067	0.763828	0.770101	1.90152e-171
ZNF785	turquoise	-0.406161	7.58777e-36	0.406161	7.58777e-36	-0.341384	3.69214e-25	0.0328045	0.334091	-0.403917	1.95838e-35
CD46	turquoise	0.713538	4.07967e-136	-0.713538	4.07967e-136	0.377549	7.94968e-31	0.0249894	0.461907	0.718758	5.2183e-139
DCTN4	turquoise	0.757517	9.4753e-163	-0.757517	9.4753e-163	0.514805	5.61131e-60	0.00594762	0.861018	0.749234	2.60405e-157
COX6A1	turquoise	-0.804317	3.36811e-198	0.804317	3.36811e-198	-0.141101	2.98754e-05	-0.06058	0.0742783	-0.832931	5.1459e-225
FAM102B	turquoise	0.555856	1.27925e-71	-0.555856	1.27925e-71	0.583392	2.1842e-80	0.0777684	0.0218656	0.522955	3.65836e-62
UQCRB	turquoise	-0.50739	4.86493e-58	0.50739	4.86493e-58	0.277185	8.5817e-17	-0.0727038	0.0321153	-0.555747	1.38122e-71
METRNL	turquoise	0.344973	1.08898e-25	-0.344973	1.08898e-25	-0.152692	6.14769e-06	0.0516941	0.127833	0.406967	5.38899e-36
SPATA2L	turquoise	0.366972	4.30136e-29	-0.366972	4.30136e-29	-0.173418	2.69215e-07	-0.0761301	0.0248162	0.420195	1.70878e-38
ZCCHC17	turquoise	-0.811504	1.68631e-204	0.811504	1.68631e-204	-0.0387374	0.253988	0.00746575	0.826052	-0.851961	7.56707e-246
RHBDL2	turquoise	-0.699723	9.16156e-129	0.699723	9.16156e-129	-0.204288	1.2192e-09	-0.0521142	0.12476	-0.706669	2.08696e-132
PAPSS1	turquoise	0.634282	5.38103e-99	-0.634282	5.38103e-99	0.21933	6.31816e-11	0.000211669	0.995029	0.626201	8.28076e-96
TBC1D17	turquoise	0.254067	2.87291e-14	-0.254067	2.87291e-14	-0.550641	4.74976e-70	-0.0746541	0.0277632	0.329122	2.12209e-23
INHBA	turquoise	0.115283	0.00066197	-0.115283	0.00066197	-0.223067	2.92607e-11	-0.0160001	0.63763	0.127867	0.000157169
PTPN12	turquoise	0.697558	1.19188e-127	-0.697558	1.19188e-127	0.291745	1.64025e-18	0.0848524	0.0123403	0.721813	9.86229e-141
SAP30	turquoise	0.240583	6.58775e-13	-0.240583	6.58775e-13	0.206346	8.23734e-10	-0.0148891	0.661164	0.256835	1.47557e-14
CES3	turquoise	0.706951	1.4768e-132	-0.706951	1.4768e-132	-0.0602582	0.0758325	-0.0447598	0.187428	0.740656	6.71989e-152
PTGES	turquoise	-0.0606244	0.074066	0.0606244	0.074066	-0.0764094	0.0242901	-0.136315	5.54329e-05	-0.0224161	0.509298
CTSS	turquoise	0.839743	3.70201e-232	-0.839743	3.70201e-232	0.278456	6.13062e-17	-0.0236266	0.486693	0.825142	3.10652e-217
GRAP2	turquoise	-0.342339	2.67233e-25	0.342339	2.67233e-25	-0.346204	7.13936e-26	0.0345125	0.309522	-0.32954	1.85417e-23
TAGLN2	turquoise	0.679637	8.45104e-119	-0.679637	8.45104e-119	0.150961	7.84494e-06	-0.01439	0.671849	0.679187	1.38313e-118
SOD2	turquoise	0.748689	5.83092e-157	-0.748689	5.83092e-157	0.212545	2.46756e-10	0.000977167	0.977053	0.752309	2.64003e-159
DRG2	turquoise	0.515313	4.11796e-60	-0.515313	4.11796e-60	-0.187752	2.45528e-08	0.0676964	0.0460401	0.52301	3.5341e-62
SLCO3A1	turquoise	0.133815	7.59509e-05	-0.133815	7.59509e-05	-0.267984	9.28975e-16	-0.0809172	0.0170409	0.227331	1.19538e-11
USP38	turquoise	0.861336	3.21972e-257	-0.861336	3.21972e-257	0.513557	1.19866e-59	0.0230495	0.497402	0.841468	5.09597e-234
MRPS23	turquoise	-0.265346	1.80809e-15	0.265346	1.80809e-15	0.193571	8.79235e-09	-0.0341618	0.314468	-0.330463	1.37444e-23
GNA12	turquoise	0.0407735	0.229859	-0.0407735	0.229859	-0.0785491	0.0205703	-0.0387937	0.253297	0.0781781	0.0211773
C12orf65	turquoise	0.0507738	0.134768	-0.0507738	0.134768	0.0446049	0.18896	0.0922889	0.00647973	0.00627095	0.853546
RSRC1	turquoise	0.0778811	0.0216745	-0.0778811	0.0216745	0.0675533	0.046503	0.0247833	0.465608	0.082734	0.0147046
SMCHD1	turquoise	0.485608	1.29226e-52	-0.485608	1.29226e-52	0.428313	4.39458e-40	-0.0201861	0.552334	0.506008	1.10354e-57
INTS5	turquoise	0.289224	3.30921e-18	-0.289224	3.30921e-18	-0.3003	1.43721e-19	-0.00899955	0.791071	0.313389	2.95031e-21
CLEC4F	turquoise	-0.0864595	0.0107775	0.0864595	0.0107775	-0.123412	0.000265581	0.00168348	0.960477	-0.071031	0.0363011
TBL1XR1	turquoise	0.422729	5.50901e-39	-0.422729	5.50901e-39	0.576214	5.07495e-78	0.0256556	0.45005	0.397536	2.79122e-34
SEC24D	turquoise	0.683948	7.17848e-121	-0.683948	7.17848e-121	0.243065	3.75342e-13	0.0156383	0.645255	0.707229	1.0495e-132
RNF165	turquoise	0.232487	3.95253e-12	-0.232487	3.95253e-12	-0.118928	0.000442611	0.229417	7.66306e-12	0.237405	1.34156e-12
P2RY10	turquoise	-0.0762233	0.0246395	0.0762233	0.0246395	0.290821	2.12345e-18	-0.0155325	0.647493	-0.138421	4.23398e-05
SLC24A3	turquoise	0.343013	2.12541e-25	-0.343013	2.12541e-25	-0.114631	0.000710555	-0.0896986	0.00815133	0.395181	7.33217e-34
RAB3IL1	turquoise	0.515945	2.79878e-60	-0.515945	2.79878e-60	-0.0211443	0.533626	-0.0903469	0.0077003	0.553275	7.71729e-71
TTF2	turquoise	-0.326646	4.70349e-23	0.326646	4.70349e-23	0.265479	1.74888e-15	0.0769983	0.0232123	-0.356163	2.18455e-27
ZNF264	turquoise	0.209884	4.15901e-10	-0.209884	4.15901e-10	-0.171606	3.59445e-07	0.0851407	0.012046	0.218854	6.96166e-11
SLC25A20	turquoise	0.0664005	0.050377	-0.0664005	0.050377	0.123349	0.000267517	0.0612732	0.0710186	0.0561579	0.0980481
DGAT1	turquoise	0.176112	1.74169e-07	-0.176112	1.74169e-07	-0.290752	2.16469e-18	-0.0908449	0.00736908	0.237263	1.38468e-12
TM6SF1	turquoise	0.576441	4.2803e-78	-0.576441	4.2803e-78	0.442384	6.06682e-43	0.051798	0.127067	0.587845	6.9435e-82
LSM1	turquoise	-0.411227	8.68746e-37	0.411227	8.68746e-37	0.164348	1.11057e-06	-0.0257823	0.447815	-0.487718	4.00698e-53
ARPC1B	turquoise	0.032238	0.342511	-0.032238	0.342511	-0.200041	2.70263e-09	-0.011257	0.74036	0.0715343	0.0349955
STK3	turquoise	0.626365	7.14919e-96	-0.626365	7.14919e-96	0.543961	4.43775e-68	-0.0418585	0.217686	0.617553	1.68338e-92
FHL2	turquoise	0.581225	1.14809e-79	-0.581225	1.14809e-79	0.0762104	0.0246639	-0.00307821	0.927801	0.617465	1.81606e-92
SPNS1	turquoise	-0.864998	6.86337e-262	0.864998	6.86337e-262	-0.360775	4.16396e-28	-0.0199157	0.55767	-0.854733	3.97918e-249
NFKBIA	turquoise	-0.369457	1.70663e-29	0.369457	1.70663e-29	-0.156999	3.31389e-06	0.0251488	0.459052	-0.392643	2.05907e-33
RBM42	turquoise	0.21466	1.62136e-10	-0.21466	1.62136e-10	-0.56235	1.29797e-73	-0.0247895	0.465497	0.29372	9.41912e-19
DBP	turquoise	0.456351	6.42911e-46	-0.456351	6.42911e-46	-0.178483	1.18055e-07	0.010329	0.761086	0.459881	1.08177e-46
TMEM107	turquoise	-0.794592	4.42512e-190	0.794592	4.42512e-190	-0.1273	0.000168168	-0.00844555	0.803662	-0.791901	6.53741e-188
CDC25B	turquoise	-0.712227	2.12073e-135	0.712227	2.12073e-135	-0.254495	2.59272e-14	0.0888852	0.00875057	-0.751924	4.70823e-159
RAD23A	turquoise	0.272194	3.15864e-16	-0.272194	3.15864e-16	-0.370062	1.36101e-29	0.00192524	0.954806	0.325637	6.49394e-23
RPL19	turquoise	-0.542088	1.5559e-67	0.542088	1.5559e-67	-0.169834	4.75534e-07	0.0457435	0.177906	-0.587045	1.29596e-81
B3GALT2	turquoise	0.595776	1.30592e-84	-0.595776	1.30592e-84	0.424277	2.74645e-39	-0.0288422	0.395777	0.554811	2.65319e-71
TRPT1	turquoise	0.194622	7.27881e-09	-0.194622	7.27881e-09	-0.084193	0.0130374	-0.00956116	0.778363	0.204733	1.12045e-09
MYEF2	turquoise	0.325857	6.05402e-23	-0.325857	6.05402e-23	0.175958	1.786e-07	-0.0930151	0.00606993	0.296157	4.72102e-19
SFXN4	turquoise	0.219174	6.52129e-11	-0.219174	6.52129e-11	0.102346	0.00252247	-0.0308775	0.363276	0.210629	3.59607e-10
CLEC12B	turquoise	0.302523	7.53284e-20	-0.302523	7.53284e-20	0.201799	1.94794e-09	-0.0292286	0.389476	0.299367	1.88169e-19
GRHPR	turquoise	0.100951	0.00288954	-0.100951	0.00288954	-0.186303	3.15559e-08	0.0456124	0.179154	0.0978712	0.00387813
LYRM4	turquoise	0.363549	1.51658e-28	-0.363549	1.51658e-28	0.230286	6.35936e-12	-0.0510171	0.132907	0.330325	1.43771e-23
BOK	turquoise	0.111212	0.00102389	-0.111212	0.00102389	-0.115501	0.000646441	-0.0628164	0.0641819	0.131058	0.000106808
LIME1	turquoise	-0.625109	2.1948e-95	0.625109	2.1948e-95	-0.19713	4.61772e-09	0.0715906	0.0348519	-0.677476	8.94697e-118
BLVRA	turquoise	-0.206094	8.64472e-10	0.206094	8.64472e-10	-0.0287372	0.397501	-0.0686301	0.0431137	-0.237933	1.19285e-12
NARF	turquoise	0.0343973	0.311141	-0.0343973	0.311141	-0.266431	1.37618e-15	-0.0360549	0.288385	0.0882302	0.00926136
DAPK1	turquoise	0.623335	1.06167e-94	-0.623335	1.06167e-94	0.00625319	0.853956	0.0457396	0.177944	0.656554	2.72348e-108
LRP5L	turquoise	-0.141604	2.7966e-05	0.141604	2.7966e-05	-0.0344085	0.310983	0.0505058	0.136841	-0.168232	6.10898e-07
CHST7	turquoise	-0.094409	0.00534811	0.094409	0.00534811	-0.11207	0.000935082	-0.0239784	0.480226	-0.0793939	0.0192444
KCNK13	turquoise	0.733193	2.30981e-147	-0.733193	2.30981e-147	0.114145	0.000748893	0.00311069	0.927042	0.728656	1.11495e-144
C11orf68	turquoise	0.399301	1.34647e-34	-0.399301	1.34647e-34	-0.431045	1.25346e-40	-0.133759	7.64774e-05	0.462028	3.62168e-47
DR1	turquoise	0.816434	5.57899e-209	-0.816434	5.57899e-209	0.499068	6.39471e-56	0.0469427	0.166792	0.798687	1.91436e-193
SLFN13	turquoise	-0.571044	2.36474e-76	0.571044	2.36474e-76	-0.190352	1.55802e-08	0.233997	2.8443e-12	-0.59014	1.15017e-82
SEMA4A	turquoise	0.316451	1.15515e-21	-0.316451	1.15515e-21	-0.304719	3.95577e-20	-0.057996	0.0875197	0.406645	6.1809e-36
MPDU1	turquoise	0.118669	0.000455604	-0.118669	0.000455604	-0.210243	3.87729e-10	-0.0126369	0.709894	0.152082	6.70128e-06
FASLG	turquoise	0.375013	2.09794e-30	-0.375013	2.09794e-30	0.252507	4.16713e-14	0.443987	2.80832e-43	0.350578	1.56783e-26
NAMPT	turquoise	-0.382665	1.09331e-31	0.382665	1.09331e-31	0.113306	0.000819586	0.00140245	0.96707	-0.39456	9.4483e-34
CAMK2G	turquoise	0.172937	2.9078e-07	-0.172937	2.9078e-07	-0.227549	1.14134e-11	0.0482335	0.15542	0.248248	1.13605e-13
ZNF593	turquoise	-0.451517	7.13494e-45	0.451517	7.13494e-45	-0.199066	3.23645e-09	-0.0310611	0.36043	-0.47911	4.52287e-51
PTPRG	turquoise	0.323978	1.10028e-22	-0.323978	1.10028e-22	-0.139594	3.63772e-05	-0.043886	0.196196	0.337769	1.24239e-24
INS	turquoise	0.756601	3.87812e-162	-0.756601	3.87812e-162	0.131271	0.000104056	-0.0117553	0.729309	0.763157	1.39841e-166
TDP1	turquoise	0.371259	8.68779e-30	-0.371259	8.68779e-30	0.30876	1.19268e-20	-0.0164038	0.629166	0.333326	5.40013e-24
CADM1	turquoise	-0.0577514	0.0888655	0.0577514	0.0888655	-0.00242071	0.943193	0.13664	5.31901e-05	-0.0741712	0.0287905
S100A6	turquoise	-0.113439	0.000807924	0.113439	0.000807924	-0.0699969	0.0391139	-0.0165528	0.626055	-0.113281	0.000821773
TRIM5	turquoise	0.0406675	0.231073	-0.0406675	0.231073	0.0829034	0.0145019	0.00720952	0.831932	0.0362013	0.286431
MUC6	turquoise	0.224171	2.32456e-11	-0.224171	2.32456e-11	-0.0865125	0.0107292	-0.069817	0.0396217	0.234739	2.41725e-12
FSTL1	turquoise	0.557659	3.61321e-72	-0.557659	3.61321e-72	0.122378	0.000299227	-0.0624293	0.0658437	0.573564	3.66649e-77
CPD	turquoise	0.792642	1.66357e-188	-0.792642	1.66357e-188	0.354109	4.53059e-27	0.00882136	0.795115	0.806868	2.0969e-200
MED25	turquoise	0.866222	1.75691e-263	-0.866222	1.75691e-263	0.178114	1.25459e-07	-0.0411748	0.225301	0.875052	1.88249e-275
ZC3H15	turquoise	-0.401034	6.55199e-35	0.401034	6.55199e-35	0.384556	5.20494e-32	0.0140767	0.678591	-0.471389	2.79925e-49
CYP4F12	turquoise	0.21058	3.63038e-10	-0.21058	3.63038e-10	-0.115261	0.000663553	-0.104425	0.00205381	0.256277	1.68873e-14
CATSPER1	turquoise	0.0220155	0.516898	-0.0220155	0.516898	-0.033731	0.320613	-0.0266718	0.4323	0.0341153	0.315127
LOC648691	turquoise	0.740117	1.44526e-151	-0.740117	1.44526e-151	0.126639	0.000181927	-0.000645532	0.984839	0.743051	2.17816e-153
DPP4	turquoise	0.181129	7.60273e-08	-0.181129	7.60273e-08	0.0850111	0.0121776	-0.0572823	0.0914938	0.150305	8.59714e-06
STARD10	turquoise	0.539636	7.93546e-67	-0.539636	7.93546e-67	-0.127957	0.000155476	-0.153561	5.43478e-06	0.593358	9.01448e-84
YEATS2	turquoise	0.0687698	0.0426897	-0.0687698	0.0426897	-0.0689647	0.0421039	0.0846015	0.0126015	0.0785164	0.0206232
CSAD	turquoise	0.163288	1.30412e-06	-0.163288	1.30412e-06	-0.0800453	0.0182733	-0.073602	0.0300433	0.224674	2.09249e-11
EFCAB6	turquoise	0.196542	5.14042e-09	-0.196542	5.14042e-09	-0.206061	8.69898e-10	-0.0709239	0.036584	0.213019	2.24688e-10
JUNB	turquoise	0.0673844	0.0470544	-0.0673844	0.0470544	-0.176886	1.53489e-07	-0.0315377	0.353103	0.146261	1.5e-05
TTC1	turquoise	-0.911288	0	0.911288	0	-0.256458	1.61621e-14	-0.0334738	0.324318	-0.919994	0
PPM1D	turquoise	0.775666	1.79521e-175	-0.775666	1.79521e-175	0.498012	1.17597e-55	-0.000507955	0.98807	0.778942	6.75255e-178
MRPS17	turquoise	-0.711433	5.73358e-135	0.711433	5.73358e-135	-0.0148439	0.662129	-0.0385701	0.256046	-0.752922	1.04761e-159
CD74	turquoise	-0.193975	8.17768e-09	0.193975	8.17768e-09	-0.251372	5.45397e-14	0.0284677	0.401943	-0.240443	6.7988e-13
DNAJC7	turquoise	-0.906975	0	0.906975	0	-0.26911	6.9736e-16	-0.0202949	0.550195	-0.908782	0
NETO2	turquoise	0.473746	8.03404e-50	-0.473746	8.03404e-50	0.474741	4.73068e-50	-0.0123578	0.71602	0.45972	1.17384e-46
VDAC3	turquoise	-0.820965	3.22137e-213	0.820965	3.22137e-213	-0.169922	4.69e-07	0.0443143	0.191861	-0.858105	3.30153e-253
MPP1	turquoise	0.692764	3.21769e-125	-0.692764	3.21769e-125	0.104315	0.0020766	-0.0593371	0.0804276	0.720064	9.63302e-140
EPAS1	turquoise	0.209424	4.54832e-10	-0.209424	4.54832e-10	-0.115434	0.000651181	-0.036679	0.280116	0.262602	3.58802e-15
BNC2	turquoise	0.412327	5.40069e-37	-0.412327	5.40069e-37	-0.0984089	0.00368601	0.146668	1.41919e-05	0.417277	6.21724e-38
LOC389641	turquoise	0.0686045	0.0431918	-0.0686045	0.0431918	0.0589629	0.0823581	-0.0458139	0.17724	0.0398596	0.24048
TSC22D1	turquoise	0.82382	5.95385e-216	-0.82382	5.95385e-216	0.349533	2.25696e-26	-0.0123443	0.716316	0.806759	2.60844e-200
AFF4	turquoise	0.776737	2.92192e-176	-0.776737	2.92192e-176	0.0051449	0.879622	0.0784873	0.0206704	0.794315	7.42558e-190
CYP4F3	turquoise	0.300703	1.27889e-19	-0.300703	1.27889e-19	0.122102	0.000308884	-0.00829273	0.807144	0.348414	3.32912e-26
PEA15	turquoise	0.0596178	0.0790041	-0.0596178	0.0790041	0.0628558	0.0640145	0.0739087	0.0293625	0.0172196	0.612211
EDARADD	turquoise	0.75774	6.70798e-163	-0.75774	6.70798e-163	0.132652	8.7763e-05	0.0237525	0.484374	0.755848	1.23058e-161
MMP25	turquoise	0.0963813	0.00445878	-0.0963813	0.00445878	-0.116031	0.000610001	-5.68346e-05	0.998665	0.152175	6.61437e-06
BANF2	turquoise	0.746905	8.05946e-156	-0.746905	8.05946e-156	0.105344	0.00187331	0.00224028	0.947421	0.747334	4.29748e-156
BRSK1	turquoise	-0.731975	1.22988e-146	0.731975	1.22988e-146	-0.243245	3.6028e-13	-0.0456122	0.179157	-0.720723	4.08964e-140
RAP2A	turquoise	0.529534	5.68928e-64	-0.529534	5.68928e-64	0.583767	1.63698e-80	0.160506	1.97893e-06	0.469991	5.84359e-49
MAP3K14	turquoise	0.269073	7.03972e-16	-0.269073	7.03972e-16	-0.188017	2.34496e-08	-0.105838	0.00178251	0.297509	3.20921e-19
DEFB123	turquoise	0.762341	5.08483e-166	-0.762341	5.08483e-166	0.126627	0.000182197	-0.00643836	0.849682	0.762829	2.35298e-166
ST6GALNAC2	turquoise	0.714255	1.64682e-136	-0.714255	1.64682e-136	0.015741	0.643088	-0.0750934	0.026856	0.761243	2.86869e-165
PIGU	turquoise	0.0665109	0.0499944	-0.0665109	0.0499944	-0.0536548	0.113983	0.0828764	0.014534	0.0428696	0.206767
TLN1	turquoise	0.0879123	0.00951864	-0.0879123	0.00951864	-0.349065	2.65548e-26	-0.077863	0.021705	0.174933	2.1092e-07
TRIM52	turquoise	-0.883347	1.47522e-287	0.883347	1.47522e-287	-0.0489853	0.149072	0.023128	0.495938	-0.910213	0
NR1H3	turquoise	0.365573	7.21193e-29	-0.365573	7.21193e-29	-0.178239	1.22905e-07	0.0566674	0.0950334	0.382349	1.23689e-31
LOC644852	turquoise	0.237769	1.23722e-12	-0.237769	1.23722e-12	0.0485329	0.152867	-0.0656143	0.0531709	0.240776	6.30804e-13
ALDH3B1	turquoise	0.31643	1.1629e-21	-0.31643	1.1629e-21	-0.371166	8.99504e-30	-0.0309602	0.361992	0.395948	5.35888e-34
ASCC2	turquoise	0.227514	1.14988e-11	-0.227514	1.14988e-11	-0.0432164	0.203115	-0.0549312	0.10562	0.254396	2.65525e-14
SWAP70	turquoise	0.335839	2.35938e-24	-0.335839	2.35938e-24	0.434472	2.55649e-41	-0.0742744	0.0285683	0.288491	4.05297e-18
ZNF503	turquoise	0.356879	1.69182e-27	-0.356879	1.69182e-27	-0.0573414	0.0911596	-0.0518678	0.126555	0.368421	2.51198e-29
MYO7B	turquoise	0.302325	7.98022e-20	-0.302325	7.98022e-20	-0.166421	8.08629e-07	-0.122188	0.000305842	0.360773	4.16787e-28
ARL4A	turquoise	0.404503	1.53005e-35	-0.404503	1.53005e-35	0.13578	5.93216e-05	-0.102518	0.00248039	0.419114	2.76104e-38
TMEM56	turquoise	0.70468	2.36276e-131	-0.70468	2.36276e-131	0.195149	6.61851e-09	-0.0333963	0.32544	0.705458	9.16453e-132
PLOD2	turquoise	0.540709	3.89579e-67	-0.540709	3.89579e-67	-8.23994e-05	0.998065	-0.0325688	0.337579	0.546373	8.72957e-69
MRPL17	turquoise	-0.573179	4.87904e-77	0.573179	4.87904e-77	0.00221575	0.947996	-0.0357423	0.292588	-0.631424	7.39786e-98
EDAR	turquoise	0.120206	0.00038331	-0.120206	0.00038331	0.190595	1.4926e-08	-0.173229	2.7747e-07	0.0874712	0.00988626
ZNF786	turquoise	-0.688715	3.34044e-123	0.688715	3.34044e-123	-0.175284	1.99242e-07	-0.000537244	0.987382	-0.715396	3.87224e-137
TUFT1	turquoise	0.0229005	0.500187	-0.0229005	0.500187	-0.0324454	0.339412	-0.145162	1.74062e-05	0.0554487	0.102371
PRICKLE1	turquoise	-0.258932	8.85808e-15	0.258932	8.85808e-15	-0.0400673	0.238036	-0.0816898	0.0160104	-0.285252	9.85895e-18
SLC14A1	turquoise	0.45946	1.33915e-46	-0.45946	1.33915e-46	0.161281	1.76316e-06	0.105014	0.00193648	0.485207	1.61284e-52
GP6	turquoise	0.571125	2.22776e-76	-0.571125	2.22776e-76	-0.192882	9.94632e-09	0.00147712	0.965318	0.618438	7.80644e-93
POLM	turquoise	0.125147	0.000216937	-0.125147	0.000216937	-0.244915	2.45778e-13	-0.0778998	0.0216429	0.168721	5.66069e-07
MT1F	turquoise	-0.812505	2.12547e-205	0.812505	2.12547e-205	-0.241198	5.73466e-13	0.0135233	0.690559	-0.839912	2.43792e-232
DOPEY2	turquoise	-0.39725	3.13989e-34	0.39725	3.13989e-34	-0.336727	1.75723e-24	0.00359595	0.9157	-0.378658	5.18676e-31
SOCS6	turquoise	0.67599	4.47515e-117	-0.67599	4.47515e-117	0.386928	2.0372e-32	-0.0499163	0.141488	0.639466	4.32513e-101
MLH3	turquoise	0.349259	2.48219e-26	-0.349259	2.48219e-26	0.255277	2.14902e-14	-0.011976	0.72443	0.319859	4.0171e-22
PSMC3	turquoise	-0.849834	2.23678e-243	0.849834	2.23678e-243	-0.289447	3.11151e-18	-0.00979382	0.773116	-0.866023	3.19838e-263
AP1S1	turquoise	-0.912506	0	0.912506	0	-0.232409	4.01994e-12	-0.0201828	0.552398	-0.901504	1.29715057866165e-317
MEFV	turquoise	0.270103	5.41057e-16	-0.270103	5.41057e-16	-0.201181	2.18651e-09	-0.0888166	0.00880282	0.335706	2.4655e-24
MFSD9	turquoise	0.431732	9.12741e-41	-0.431732	9.12741e-41	0.273546	2.22546e-16	-0.0569877	0.0931762	0.423071	4.72502e-39
ZNF304	turquoise	0.538027	2.29637e-66	-0.538027	2.29637e-66	0.52029	1.92565e-61	-0.0115418	0.734038	0.496172	3.38433e-55
SPC24	turquoise	-0.809824	5.29513e-203	0.809824	5.29513e-203	-0.302083	8.56347e-20	-0.0548515	0.106127	-0.791533	1.28676e-187
MCTS1	turquoise	-0.449033	2.42091e-44	0.449033	2.42091e-44	0.291667	1.67667e-18	-0.0989064	0.003516	-0.508485	2.53348e-58
C3orf62	turquoise	0.371579	7.70256e-30	-0.371579	7.70256e-30	0.0505207	0.136725	-0.0646097	0.0569278	0.427009	7.96579e-40
COPG2	turquoise	-0.607977	5.89898e-89	0.607977	5.89898e-89	-0.328247	2.81374e-23	-0.00345653	0.918957	-0.591529	3.84557e-83
GCA	turquoise	0.629059	6.33171e-97	-0.629059	6.33171e-97	0.245077	2.36787e-13	-0.0042708	0.899956	0.647619	1.81232e-104
FBXO7	turquoise	0.577515	1.90988e-78	-0.577515	1.90988e-78	0.131596	9.99808e-05	-0.0153185	0.652028	0.589942	1.34312e-82
ATP6V0C	turquoise	0.669099	6.94621e-114	-0.669099	6.94621e-114	0.102715	0.00243289	-0.0327282	0.335217	0.694449	4.55338e-126
STRA13	turquoise	0.0750061	0.0270342	-0.0750061	0.0270342	-0.000310036	0.992718	0.0502948	0.138491	0.0263977	0.437048
SRPK1	turquoise	0.146828	1.38863e-05	-0.146828	1.38863e-05	0.182306	6.23831e-08	-0.0779082	0.0216286	0.200352	2.55115e-09
CRTAP	turquoise	-0.0493954	0.145695	0.0493954	0.145695	-0.110483	0.00110552	0.0799989	0.0183412	-0.0553176	0.103187
KRTCAP2	turquoise	-0.587878	6.7681e-82	0.587878	6.7681e-82	-0.203053	1.53957e-09	0.0326245	0.336752	-0.633726	8.98065e-99
ROCK1	turquoise	-0.620161	1.73463e-93	0.620161	1.73463e-93	0.388861	9.42836e-33	-0.0269898	0.42683	-0.640453	1.70723e-101
CHST3	turquoise	0.753037	8.81233e-160	-0.753037	8.81233e-160	0.127999	0.000154709	-0.0234518	0.489923	0.758261	3.00037e-163
MRPS26	turquoise	0.18963	1.76879e-08	-0.18963	1.76879e-08	0.0416086	0.220448	0.0527183	0.120444	0.164218	1.13273e-06
BTN3A2	turquoise	-0.121396	0.000334844	0.121396	0.000334844	-0.0864414	0.0107941	0.0669653	0.0484466	-0.140431	3.2615e-05
ADM	turquoise	0.0665307	0.0499264	-0.0665307	0.0499264	0.00236928	0.944398	-0.046278	0.172887	0.129635	0.000127025
HLA-C	turquoise	-0.556831	6.46212e-72	0.556831	6.46212e-72	-0.188626	2.10858e-08	-0.0231747	0.495068	-0.546789	6.58215e-69
DHX38	turquoise	0.338482	9.7909e-25	-0.338482	9.7909e-25	-0.263297	3.01856e-15	0.0824897	0.0150014	0.37609	1.39117e-30
LAGE3	turquoise	0.0650253	0.0553476	-0.0650253	0.0553476	-0.0377676	0.266079	-0.0160694	0.636173	0.0349332	0.303658
MGAM	turquoise	0.0475453	0.161407	-0.0475453	0.161407	-0.0294836	0.385351	-0.0762264	0.0246338	0.112315	0.000911089
FBXL16	turquoise	-0.860787	1.57399e-256	0.860787	1.57399e-256	-0.250813	6.22354e-14	-0.0311991	0.358299	-0.855264	9.20787e-250
ZNHIT3	turquoise	-0.550572	4.98112e-70	0.550572	4.98112e-70	0.26006	6.71942e-15	0.0131519	0.698636	-0.623122	1.28191e-94
GOLGB1	turquoise	0.341728	3.28594e-25	-0.341728	3.28594e-25	-0.0926258	0.00628667	-0.110375	0.00111805	0.358416	9.75355e-28
PHC2	turquoise	0.20351	1.41238e-09	-0.20351	1.41238e-09	-0.313861	2.55503e-21	-0.10748	0.00150857	0.304517	4.19802e-20
ADA	turquoise	0.196004	5.66823e-09	-0.196004	5.66823e-09	-0.147386	1.28664e-05	0.153393	5.56592e-06	0.182528	6.00905e-08
NSUN4	turquoise	0.35915	7.49031e-28	-0.35915	7.49031e-28	0.259436	7.83091e-15	0.0540808	0.111136	0.330917	1.18616e-23
SNRPF	turquoise	-0.841354	6.77164e-234	0.841354	6.77164e-234	-0.134434	7.02877e-05	0.00848748	0.802707	-0.882099	1.11654e-285
DRAP1	turquoise	-0.650098	1.62323e-105	0.650098	1.62323e-105	-0.210084	3.99996e-10	-0.0104517	0.758335	-0.676555	2.43009e-117
HPS3	turquoise	0.514574	6.45954e-60	-0.514574	6.45954e-60	0.452909	3.58203e-45	0.0761405	0.0247963	0.49708	2.01035e-55
TMCO3	turquoise	0.36402	1.2765e-28	-0.36402	1.2765e-28	0.324926	8.14233e-23	0.0177937	0.6004	0.397226	3.17117e-34
ZNF831	turquoise	0.452483	4.42292e-45	-0.452483	4.42292e-45	0.0880881	0.00937561	0.232028	4.36689e-12	0.434455	2.57614e-41
PDE7A	turquoise	-0.911893	0	0.911893	0	-0.1574	3.12583e-06	0.0209219	0.537939	-0.926972	0
TOM1	turquoise	0.142849	2.37209e-05	-0.142849	2.37209e-05	-0.296839	3.88714e-19	-0.112272	0.000915202	0.218695	7.19064e-11
HIST3H2A	turquoise	-0.300617	1.31119e-19	0.300617	1.31119e-19	-0.0439334	0.195712	-0.0106815	0.753191	-0.290522	2.308e-18
CETN2	turquoise	-0.802559	1.06775e-196	0.802559	1.06775e-196	-0.161456	1.71752e-06	-0.0237266	0.484849	-0.82949	1.57715e-221
C14orf142	turquoise	-0.712618	1.29823e-135	0.712618	1.29823e-135	0.160268	2.05007e-06	0.0078457	0.817352	-0.745345	7.87249e-155
SLC38A5	turquoise	0.625365	1.74696e-95	-0.625365	1.74696e-95	-0.0184193	0.587651	-0.0654329	0.0538335	0.654423	2.28462e-107
AIRE	turquoise	-0.563941	4.14998e-74	0.563941	4.14998e-74	-0.173054	2.85362e-07	-0.000354931	0.991664	-0.584601	8.61298e-81
PRRC1	turquoise	0.151057	7.73954e-06	-0.151057	7.73954e-06	0.193498	8.90791e-09	0.179321	1.02765e-07	0.127895	0.000156641
SYTL3	turquoise	0.229133	8.1436e-12	-0.229133	8.1436e-12	-0.359186	7.39397e-28	0.143161	2.27565e-05	0.286771	6.50746e-18
TCEA3	turquoise	-0.48187	1.00847e-51	0.48187	1.00847e-51	-0.175079	2.0598e-07	-0.148189	1.15245e-05	-0.520617	1.57218e-61
PCDHA5	turquoise	0.727747	3.79049e-144	-0.727747	3.79049e-144	0.129607	0.000127444	0.0325574	0.337747	0.723763	7.61493e-142
L2HGDH	turquoise	-0.934349	0	0.934349	0	-0.317364	8.71757e-22	-0.0164399	0.628412	-0.914812	0
TALDO1	turquoise	0.648116	1.11956e-104	-0.648116	1.11956e-104	0.111287	0.00101584	-0.0214981	0.5268	0.663811	1.70907e-111
MRPL2	turquoise	-0.721361	1.78016e-140	0.721361	1.78016e-140	-0.383872	6.81e-32	0.000150242	0.996471	-0.705871	5.53826e-132
WSB2	turquoise	0.710905	1.10904e-134	-0.710905	1.10904e-134	0.469632	7.05477e-49	-0.000246178	0.994218	0.689131	2.08084e-123
NEK8	turquoise	-0.874998	2.24181e-275	0.874998	2.24181e-275	-0.371443	8.10575e-30	-0.0505853	0.136224	-0.854382	1.04433e-248
CLDN23	turquoise	0.0374634	0.269952	-0.0374634	0.269952	0.0658648	0.052267	0.00392988	0.907905	0.0575459	0.0900092
NBEAL2	turquoise	0.104963	0.00194637	-0.104963	0.00194637	-0.352696	7.46005e-27	-0.045106	0.184035	0.184142	4.56949e-08
IL18RAP	turquoise	0.287698	5.04349e-18	-0.287698	5.04349e-18	0.153626	5.38412e-06	0.0116317	0.732044	0.290556	2.28617e-18
GPX1	turquoise	0.460163	9.37221e-47	-0.460163	9.37221e-47	0.0690711	0.0417872	-0.0542124	0.110268	0.468272	1.43728e-48
MCHR2	turquoise	0.74941	2.00531e-157	-0.74941	2.00531e-157	0.123955	0.00024936	-0.0347356	0.306403	0.752722	1.41727e-159
PA2G4	turquoise	-0.0943442	0.0053799	0.0943442	0.0053799	-0.279582	4.54468e-17	-0.0148741	0.661485	-0.117421	0.00052347
TP53	turquoise	0.195266	6.47932e-09	-0.195266	6.47932e-09	-0.286478	7.05259e-18	0.080541	0.0175636	0.209865	4.17399e-10
HMBOX1	turquoise	-0.329204	2.06641e-23	0.329204	2.06641e-23	-0.056618	0.0953225	0.128483	0.000145972	-0.335087	3.0251e-24
MRPL14	turquoise	-0.584529	9.10141e-81	0.584529	9.10141e-81	0.00277061	0.934999	-0.0284111	0.40288	-0.632901	1.91606e-98
TBCEL	turquoise	0.289082	3.44233e-18	-0.289082	3.44233e-18	0.468901	1.03483e-48	-0.0571773	0.0920909	0.263552	2.83271e-15
STAR	turquoise	-0.792112	4.43468e-188	0.792112	4.43468e-188	-0.294228	8.16112e-19	-0.0523963	0.122729	-0.768697	1.89122e-170
SPRR1B	turquoise	0.723338	1.33264e-141	-0.723338	1.33264e-141	0.132348	9.11292e-05	0.000240782	0.994345	0.731822	1.51613e-146
VNN2	turquoise	-0.181022	7.74066e-08	0.181022	7.74066e-08	0.185619	3.54968e-08	-0.0316352	0.351616	-0.201293	2.141e-09
WDR74	turquoise	-0.939367	0	0.939367	0	-0.309037	1.09762e-20	-0.0331305	0.329308	-0.93315	0
PCMT1	turquoise	-0.791736	8.85697e-188	0.791736	8.85697e-188	-0.0283878	0.403266	-0.0142163	0.675583	-0.83147	1.58789e-223
RILP	turquoise	0.336893	1.66301e-24	-0.336893	1.66301e-24	-0.173799	2.53234e-07	-0.0458868	0.176551	0.408343	2.99822e-36
UCP2	turquoise	0.109858	0.00118007	-0.109858	0.00118007	-0.121619	0.000326447	-0.018442	0.587191	0.111897	0.000952387
ZNF669	turquoise	-0.58511	5.81105e-81	0.58511	5.81105e-81	-0.168885	5.51797e-07	-0.0194498	0.566925	-0.5986	1.33875e-85
CRY2	turquoise	0.358047	1.11382e-27	-0.358047	1.11382e-27	-0.255525	2.02455e-14	0.000713902	0.983234	0.377432	8.31447e-31
PLXDC2	turquoise	0.348753	2.95987e-26	-0.348753	2.95987e-26	0.207103	7.12481e-10	-0.0770985	0.0230332	0.396137	4.95935e-34
ISL2	turquoise	0.371683	7.40594e-30	-0.371683	7.40594e-30	-0.0434545	0.200634	-0.0856917	0.0115008	0.407671	3.99275e-36
IQGAP1	turquoise	0.796311	1.75149e-191	-0.796311	1.75149e-191	0.213575	2.01238e-10	-0.0132161	0.697238	0.802415	1.41418e-196
FPR1	turquoise	0.391355	3.46464e-33	-0.391355	3.46464e-33	0.114762	0.000700497	-0.0103238	0.761203	0.423475	3.94067e-39
SLC44A4	turquoise	-0.605615	4.23347e-88	0.605615	4.23347e-88	-0.18569	3.50632e-08	-0.0258566	0.446507	-0.626748	5.07093e-96
KCTD10	turquoise	0.424447	2.54377e-39	-0.424447	2.54377e-39	-0.0297524	0.381032	0.153483	5.495e-06	0.415139	1.58873e-37
TRAPPC5	turquoise	0.0408322	0.229188	-0.0408322	0.229188	-0.110053	0.00115639	-0.125967	0.000196983	0.0477759	0.159382
TCP11L2	turquoise	0.567214	3.89462e-75	-0.567214	3.89462e-75	0.0104317	0.758783	-0.00490933	0.885095	0.621793	4.14096e-94
HAT1	turquoise	-0.350652	1.52742e-26	0.350652	1.52742e-26	0.504615	2.51135e-57	-0.0475837	0.161069	-0.40711	5.07089e-36
CCM2	turquoise	0.0770196	0.0231741	-0.0770196	0.0231741	-0.205313	1.00337e-09	0.00335838	0.92125	0.10463	0.00201235
ATF7IP2	turquoise	0.389684	6.78387e-33	-0.389684	6.78387e-33	0.365869	6.46683e-29	0.093901	0.00560171	0.327359	3.74392e-23
CD86	turquoise	-0.0742811	0.028554	0.0742811	0.028554	0.232648	3.81701e-12	-0.11616	0.000601459	-0.115447	0.000650251
MAL	turquoise	-0.56511	1.78795e-74	0.56511	1.78795e-74	-0.174985	2.09141e-07	-0.0231828	0.494916	-0.611377	3.36058e-90
OXSM	turquoise	0.598196	1.85777e-85	-0.598196	1.85777e-85	0.545304	1.79774e-68	0.0216837	0.523236	0.541142	2.92138e-67
DAZAP2	turquoise	0.392933	1.83059e-33	-0.392933	1.83059e-33	0.113154	0.000833056	0.0723542	0.0329542	0.405046	1.21689e-35
ERF	turquoise	0.546271	9.34753e-69	-0.546271	9.34753e-69	-0.144753	1.83904e-05	-0.0917514	0.00679884	0.607694	7.48075e-89
BEST1	turquoise	0.615779	7.79629e-92	-0.615779	7.79629e-92	-0.042193	0.214029	-0.0622829	0.0664813	0.682813	2.53951e-120
C10orf128	turquoise	0.367223	3.91958e-29	-0.367223	3.91958e-29	0.13568	6.00767e-05	-0.0155284	0.647579	0.362696	2.07128e-28
TCTN1	turquoise	0.500892	2.21981e-56	-0.500892	2.21981e-56	0.121279	0.000339332	-0.0648536	0.055996	0.496296	3.15213e-55
CYSLTR1	turquoise	-0.135971	5.79088e-05	0.135971	5.79088e-05	0.345027	1.06935e-25	-0.124562	0.000232328	-0.189987	1.6614e-08
VCAN	turquoise	-0.149797	9.22765e-06	0.149797	9.22765e-06	-0.0272099	0.423069	-0.0822097	0.0153481	-0.157948	2.88525e-06
ABHD5	turquoise	0.739755	2.41663e-151	-0.739755	2.41663e-151	0.223917	2.45113e-11	-0.0180131	0.595916	0.763116	1.49162e-166
ALDH8A1	turquoise	-0.105206	0.00189949	0.105206	0.00189949	-0.0546264	0.107571	0.0180548	0.595064	-0.119128	0.000432771
GTF3C1	turquoise	0.374936	2.16022e-30	-0.374936	2.16022e-30	-0.321348	2.52085e-22	0.162782	1.40772e-06	0.410796	1.0465e-36
SLC27A3	turquoise	0.301608	9.8329e-20	-0.301608	9.8329e-20	-0.268128	8.95586e-16	0.133134	8.26767e-05	0.333781	4.6511e-24
RGS2	turquoise	0.185548	3.59288e-08	-0.185548	3.59288e-08	0.130449	0.000115053	0.00803313	0.813068	0.198514	3.58337e-09
STAC2	turquoise	0.730985	4.74942e-146	-0.730985	4.74942e-146	0.114739	0.000702285	-0.0226738	0.50444	0.739415	3.9144e-151
ENDOD1	turquoise	0.0438691	0.196368	-0.0438691	0.196368	-0.0797473	0.0187122	0.0126404	0.709816	0.066838	0.0488759
PIM1	turquoise	0.682181	5.11554e-120	-0.682181	5.11554e-120	0.128263	0.000149888	0.00738944	0.827802	0.698803	2.73386e-128
AK1	turquoise	0.178284	1.22008e-07	-0.178284	1.22008e-07	-0.24571	2.04655e-13	0.165524	9.28084e-07	0.196256	5.41459e-09
NRCAM	turquoise	0.617602	1.61364e-92	-0.617602	1.61364e-92	0.229252	7.93881e-12	-0.0367046	0.27978	0.584377	1.02348e-80
PITPNM2	turquoise	0.320012	3.82992e-22	-0.320012	3.82992e-22	-0.159832	2.18689e-06	-0.0219396	0.518344	0.342935	2.18247e-25
PMM2	turquoise	0.0411465	0.225621	-0.0411465	0.225621	-0.098795	0.00355344	-0.0512681	0.131008	0.0404358	0.233744
PIK3IP1	turquoise	-0.544725	2.65615e-68	0.544725	2.65615e-68	-0.177519	1.38374e-07	0.0399049	0.239945	-0.596614	6.65817e-85
SELPLG	turquoise	-0.540006	6.21033e-67	0.540006	6.21033e-67	-0.244174	2.91306e-13	0.00498663	0.883298	-0.548813	1.66148e-69
CLEC7A	turquoise	-0.449919	1.56768e-44	0.449919	1.56768e-44	-0.0482329	0.155425	-0.041239	0.224578	-0.422728	5.51113e-39
BAG3	turquoise	-0.327526	3.54751e-23	0.327526	3.54751e-23	-0.123675	0.00025761	-0.00514366	0.879651	-0.352267	8.67401e-27
CD1A	turquoise	0.0240967	0.478063	-0.0240967	0.478063	0.0544743	0.108556	-0.0701968	0.0385563	0.0110341	0.745322
RPS28	turquoise	0.0760212	0.025024	-0.0760212	0.025024	0.0625149	0.0654731	-0.0211994	0.53256	0.0502538	0.138813
RPL10L	turquoise	0.369652	1.5868e-29	-0.369652	1.5868e-29	0.125456	0.000209204	-0.0488161	0.150484	0.35879	8.52693e-28
FOSB	turquoise	-0.736214	3.51471e-149	0.736214	3.51471e-149	-0.386426	2.48611e-32	-0.019734	0.561271	-0.701978	6.18295e-130
PRRG4	turquoise	0.215144	1.47207e-10	-0.215144	1.47207e-10	0.0206423	0.543387	-0.0790956	0.0197037	0.2618	4.37651e-15
KLHL21	turquoise	0.262287	3.87957e-15	-0.262287	3.87957e-15	-0.096737	0.0043134	-0.0320604	0.345178	0.328076	2.97354e-23
CHST12	turquoise	-0.847358	1.50295e-240	0.847358	1.50295e-240	-0.375294	1.88476e-30	0.195789	5.8943e-09	-0.844342	3.58813e-237
COPS5	turquoise	-0.796843	6.40175e-192	0.796843	6.40175e-192	-0.0110174	0.745694	-0.0312625	0.357322	-0.834692	7.87389e-227
PLXNC1	turquoise	-0.230092	6.63045e-12	0.230092	6.63045e-12	-0.0162023	0.633385	0.0522896	0.123494	-0.201676	1.99351e-09
ABCB4	turquoise	0.149455	9.67617e-06	-0.149455	9.67617e-06	0.130505	0.000114266	-0.11422	0.000742853	0.120378	0.000375935
ZBTB40	turquoise	-0.825027	4.01995e-217	0.825027	4.01995e-217	-0.316949	9.9095e-22	0.0194197	0.567526	-0.840095	1.55145e-232
MEGF9	turquoise	0.42716	7.43727e-40	-0.42716	7.43727e-40	0.344501	1.27987e-25	-0.0773837	0.0225297	0.466578	3.47299e-48
SLC10A2	turquoise	0.699706	9.34882e-129	-0.699706	9.34882e-129	0.13216	9.32721e-05	0.0228081	0.501917	0.700259	4.84055e-129
USMG5	turquoise	0.501787	1.31801e-56	-0.501787	1.31801e-56	0.440314	1.62969e-42	-0.0785688	0.0205385	0.439389	2.52907e-42
PGD	turquoise	0.629531	4.13071e-97	-0.629531	4.13071e-97	0.135169	6.40867e-05	0.0126217	0.710226	0.650741	8.65237e-106
SOX13	turquoise	-0.206354	8.22547e-10	0.206354	8.22547e-10	-0.312533	3.8269e-21	0.367017	4.2314e-29	-0.183011	5.53765e-08
MRPL21	turquoise	-0.7887	2.26372e-185	0.7887	2.26372e-185	-0.0751629	0.0267149	-0.0890614	0.00861751	-0.818069	1.70064e-210
HIPK2	turquoise	-0.781776	4.99329e-180	0.781776	4.99329e-180	-0.436909	8.15919e-42	-0.012569	0.711383	-0.754148	1.63869e-160
ZC3H18	turquoise	0.250411	6.84291e-14	-0.250411	6.84291e-14	-0.490027	1.10232e-53	-0.0641867	0.0585746	0.312389	3.99847e-21
SEC14L1	turquoise	0.836581	8.41548e-229	-0.836581	8.41548e-229	0.140781	3.11573e-05	0.0006824	0.983974	0.857076	5.96463e-252
RNASET2	turquoise	0.0780916	0.0213211	-0.0780916	0.0213211	-0.0252184	0.457811	-0.0287004	0.398105	0.103378	0.00227897
CLEC5A	turquoise	0.139636	3.61781e-05	-0.139636	3.61781e-05	0.113631	0.000791484	-0.153718	5.31411e-06	0.160023	2.12588e-06
NUP153	turquoise	0.0916584	0.00685546	-0.0916584	0.00685546	-0.137371	4.84492e-05	0.117559	0.000515516	0.13982	3.53228e-05
TNFRSF13B	turquoise	-0.194196	7.85925e-09	0.194196	7.85925e-09	-0.22875	8.83784e-12	-0.0457719	0.177637	-0.198196	3.79884e-09
AQP9	turquoise	0.530484	3.09501e-64	-0.530484	3.09501e-64	0.194195	7.86039e-09	-0.0100481	0.767393	0.55248	1.33784e-70
MGST2	turquoise	0.0334558	0.324579	-0.0334558	0.324579	0.0761281	0.0248201	-0.0371071	0.274537	0.016558	0.625945
FCRL2	turquoise	0.179412	1.01226e-07	-0.179412	1.01226e-07	0.165452	9.38293e-07	-0.129886	0.000123215	0.155297	4.23865e-06
SHKBP1	turquoise	0.346183	7.192e-26	-0.346183	7.192e-26	-0.319986	3.86087e-22	-0.0818771	0.0157689	0.425451	1.61585e-39
MME	turquoise	0.469772	6.55496e-49	-0.469772	6.55496e-49	0.359474	6.66576e-28	-0.0607992	0.0732346	0.508079	3.22819e-58
CASS4	turquoise	0.120313	0.000378714	-0.120313	0.000378714	-0.113226	0.000826586	-0.0275159	0.417871	0.181539	7.09689e-08
MKNK1	turquoise	0.131172	0.000105319	-0.131172	0.000105319	-0.0275539	0.417227	-0.00126509	0.970294	0.195142	6.62627e-09
NDUFA13	turquoise	-0.856181	7.25349e-251	0.856181	7.25349e-251	-0.230784	5.71301e-12	-0.020903	0.538306	-0.88817	4.99765e-295
FBXO33	turquoise	0.891956	3.88918e-301	-0.891956	3.88918e-301	0.449799	1.66299e-44	0.00624251	0.854203	0.871107	5.39782e-270
SELM	turquoise	-0.846655	9.3611e-240	0.846655	9.3611e-240	-0.307489	1.74275e-20	-0.0213496	0.52966	-0.842731	2.1366e-235
MRPL1	turquoise	-0.437357	6.60797e-42	0.437357	6.60797e-42	0.3692	1.87845e-29	0.029582	0.383766	-0.502563	8.37707e-57
LITAF	turquoise	0.520036	2.25441e-61	-0.520036	2.25441e-61	0.0843126	0.0129084	0.0154405	0.64944	0.552677	1.1675e-70
IRS2	turquoise	0.353639	5.34891e-27	-0.353639	5.34891e-27	0.150198	8.72735e-06	0.0293632	0.387295	0.401405	5.61366e-35
EIF1B	turquoise	0.87017	1.00465e-268	-0.87017	1.00465e-268	0.260757	5.66204e-15	-0.0136276	0.688298	0.86776	1.66827e-265
NCF2	turquoise	0.702938	1.94768e-130	-0.702938	1.94768e-130	0.208965	4.97247e-10	-0.0472602	0.163938	0.709571	5.8341e-134
B2M	turquoise	-0.204919	1.08164e-09	0.204919	1.08164e-09	0.0718237	0.0342629	-0.0641438	0.0587435	-0.235174	2.19687e-12
FLVCR2	turquoise	0.326377	5.12738e-23	-0.326377	5.12738e-23	0.021283	0.530944	-0.109539	0.00121992	0.3489	2.81264e-26
ARRDC4	turquoise	0.514718	5.91716e-60	-0.514718	5.91716e-60	0.495902	3.95131e-55	-0.0431625	0.203679	0.50512	1.86564e-57
FHIT	turquoise	-0.209569	4.42205e-10	0.209569	4.42205e-10	-0.175063	2.06516e-07	-0.171846	3.46022e-07	-0.235489	2.05001e-12
ILF2	turquoise	-0.851579	2.11293e-245	0.851579	2.11293e-245	-0.15855	2.6416e-06	-0.00213752	0.94983	-0.888745	6.08155e-296
EP300	turquoise	-0.00193533	0.95457	0.00193533	0.95457	-0.119181	0.000430204	0.0552944	0.103331	0.0291969	0.38999
RHOA	turquoise	0.814636	2.48549e-207	-0.814636	2.48549e-207	0.192249	1.11345e-08	0.0263705	0.437521	0.811643	1.26482e-204
SAMD9L	turquoise	-0.201673	1.99433e-09	0.201673	1.99433e-09	0.0692934	0.0411315	0.0239319	0.481078	-0.236359	1.69162e-12
AP1G1	turquoise	0.146733	1.40662e-05	-0.146733	1.40662e-05	0.312505	3.86009e-21	0.0236537	0.486193	0.160647	1.93761e-06
DGAT2	turquoise	0.547922	3.04805e-69	-0.547922	3.04805e-69	-0.063603	0.0609112	-0.101938	0.00262509	0.61783	1.32327e-92
NUP37	turquoise	-0.894479	2.45805e-305	0.894479	2.45805e-305	-0.0741721	0.0287885	-0.00870999	0.797646	-0.924697	0
MBTD1	turquoise	-0.343787	1.63346e-25	0.343787	1.63346e-25	0.134075	7.35191e-05	0.0423361	0.212478	-0.380281	2.76806e-31
PMP2	turquoise	0.46202	3.63705e-47	-0.46202	3.63705e-47	-0.119191	0.000429746	-0.0534404	0.115438	0.463726	1.51606e-47
WDR27	turquoise	0.0124341	0.714343	-0.0124341	0.714343	-0.0412235	0.224753	-0.0463311	0.172394	-0.00499542	0.883094
IFT74	turquoise	-0.800487	5.99592e-195	0.800487	5.99592e-195	0.084639	0.0125622	-0.026966	0.427239	-0.829185	3.1782e-221
CMIP	turquoise	0.130767	0.000110674	-0.130767	0.000110674	-0.443919	2.90211e-43	-0.0167516	0.621912	0.215192	1.45796e-10
NTAN1	turquoise	0.267745	9.87067e-16	-0.267745	9.87067e-16	0.192777	1.01334e-08	-0.00815524	0.81028	0.247787	1.26471e-13
LRFN5	turquoise	0.548317	2.32984e-69	-0.548317	2.32984e-69	-0.0762473	0.0245943	-0.0544049	0.109008	0.549285	1.2027e-69
ARSG	turquoise	0.109734	0.00119552	-0.109734	0.00119552	-0.181689	6.92121e-08	0.0230245	0.497869	0.178108	1.25583e-07
GNE	turquoise	0.321358	2.51285e-22	-0.321358	2.51285e-22	0.0822857	0.0152533	0.0308472	0.363749	0.32199	2.0604e-22
HAL	turquoise	0.225037	1.93938e-11	-0.225037	1.93938e-11	0.131251	0.000104311	-0.112347	0.000907931	0.288852	3.66801e-18
LSM7	turquoise	-0.77896	6.5451e-178	0.77896	6.5451e-178	-0.142501	2.48401e-05	-0.0250945	0.460023	-0.820533	8.2656e-213
FAM73A	turquoise	-0.538965	1.23654e-66	0.538965	1.23654e-66	0.130324	0.000116817	-0.0315049	0.353604	-0.579342	4.80382e-79
GYPC	turquoise	0.176248	1.70343e-07	-0.176248	1.70343e-07	-0.0130559	0.70073	-0.0568531	0.0939532	0.19207	1.14941e-08
NAB1	turquoise	0.814489	3.38491e-207	-0.814489	3.38491e-207	0.506698	7.33644e-58	-0.0273837	0.420112	0.790434	9.66034e-187
ZKSCAN2	turquoise	0.0333086	0.326712	-0.0333086	0.326712	0.0691533	0.0415435	0.0347225	0.306586	-0.00339049	0.9205
KIAA1024	turquoise	0.651675	3.45864e-106	-0.651675	3.45864e-106	0.323631	1.22811e-22	-0.0472819	0.163745	0.620861	9.39892e-94
E2F2	turquoise	0.344298	1.37182e-25	-0.344298	1.37182e-25	0.0160198	0.637215	-0.0408169	0.229363	0.355581	2.68765e-27
ANKRD36B	turquoise	0.0803364	0.0178536	-0.0803364	0.0178536	0.031267	0.357253	0.175978	1.78014e-07	0.0294757	0.385479
TMEM79	turquoise	0.406965	5.39441e-36	-0.406965	5.39441e-36	-0.0616554	0.0692723	-0.0367516	0.279164	0.418621	3.43458e-38
LRRC25	turquoise	0.772953	1.70164e-173	-0.772953	1.70164e-173	0.0278505	0.41223	-0.0486549	0.151837	0.801728	5.40513e-196
BATF3	turquoise	0.133149	8.25156e-05	-0.133149	8.25156e-05	0.0834869	0.0138222	0.0199331	0.557328	0.128862	0.000139455
NANS	turquoise	0.120442	0.000373217	-0.120442	0.000373217	-0.328376	2.69936e-23	-0.105402	0.00186255	0.160922	1.86002e-06
ABCC5	turquoise	0.192373	1.08916e-08	-0.192373	1.08916e-08	-0.135396	6.22744e-05	0.00156944	0.963152	0.238412	1.07205e-12
HLA-DMA	turquoise	-0.428667	3.73803e-40	0.428667	3.73803e-40	-0.156314	3.66008e-06	0.0182428	0.591236	-0.473515	9.08379e-50
SAMD1	turquoise	-0.210909	3.40438e-10	0.210909	3.40438e-10	-0.422795	5.34869e-39	-0.0235009	0.489014	-0.196626	5.06237e-09
RFWD3	turquoise	0.282319	2.18297e-17	-0.282319	2.18297e-17	-0.038851	0.252597	0.0762097	0.0246653	0.284164	1.32543e-17
GADD45A	turquoise	0.235533	2.02982e-12	-0.235533	2.02982e-12	0.216379	1.14887e-10	-0.0517436	0.127468	0.281736	2.55411e-17
KREMEN1	turquoise	0.339611	6.70713e-25	-0.339611	6.70713e-25	-0.0348828	0.304357	-0.0812163	0.0166354	0.389695	6.75321e-33
XRCC6BP1	turquoise	-0.074026	0.0291057	0.074026	0.0291057	0.235657	1.97536e-12	0.0494074	0.145596	-0.119536	0.000413423
RAB32	turquoise	0.0528172	0.119748	-0.0528172	0.119748	0.0921615	0.00655414	-0.0892731	0.00846004	0.0754509	0.0261369
NECAP2	turquoise	0.239086	9.22196e-13	-0.239086	9.22196e-13	-0.00889944	0.793343	-0.0395708	0.243906	0.228632	9.06413e-12
MAN1C1	turquoise	-0.148225	1.14681e-05	0.148225	1.14681e-05	-0.0285588	0.400438	-0.0549372	0.105582	-0.189658	1.76022e-08
MRPL48	turquoise	-0.798951	1.15495e-193	0.798951	1.15495e-193	0.0063199	0.852416	-0.0253512	0.455445	-0.835627	8.39606e-228
JUN	turquoise	-0.0943694	0.00536749	0.0943694	0.00536749	-0.149171	1.00641e-05	0.0488853	0.149905	-0.074045	0.0290643
RBBP5	turquoise	0.0528922	0.119223	-0.0528922	0.119223	0.098042	0.00381615	0.0741339	0.0288712	0.0447522	0.187502
COQ5	turquoise	-0.550192	6.46379e-70	0.550192	6.46379e-70	0.181746	6.8546e-08	-0.0507448	0.134991	-0.612334	1.48971e-90
KCNA3	turquoise	-0.129634	0.000127037	0.129634	0.000127037	-0.133343	8.05467e-05	0.13187	9.66704e-05	-0.162045	1.57249e-06
DUSP5	turquoise	0.0385965	0.25572	-0.0385965	0.25572	0.0763769	0.0243508	0.249522	8.43225e-14	0.0298055	0.380183
SLC46A2	turquoise	0.180391	8.6014e-08	-0.180391	8.6014e-08	-0.0827329	0.0147059	-0.00949113	0.779945	0.21084	3.45021e-10
HCG4	turquoise	0.566048	9.07539e-75	-0.566048	9.07539e-75	0.203642	1.37765e-09	0.0483104	0.154762	0.560404	5.19132e-73
C15orf54	turquoise	0.0459256	0.176184	-0.0459256	0.176184	-0.0425889	0.209757	-0.0307886	0.364661	0.0645547	0.0571398
DARS	turquoise	-0.826706	9.13944e-219	0.826706	9.13944e-219	-0.159078	2.44417e-06	0.026153	0.441311	-0.869199	2.02545e-267
SYTL4	turquoise	0.529031	7.84808e-64	-0.529031	7.84808e-64	0.0612477	0.0711367	-0.0859369	0.0112653	0.563344	6.3701e-74
REM2	turquoise	0.321535	2.37721e-22	-0.321535	2.37721e-22	-0.00927126	0.784916	-0.0883897	0.00913457	0.384782	4.76033e-32
PIN1	turquoise	0.0358103	0.291671	-0.0358103	0.291671	0.0141097	0.67788	0.0297709	0.380736	-0.00651001	0.84803
TCEB3	turquoise	0.372928	4.63026e-30	-0.372928	4.63026e-30	-0.252041	4.65448e-14	0.0186055	0.583881	0.390172	5.57773e-33
R3HCC1	turquoise	0.112492	0.000894028	-0.112492	0.000894028	-0.0702753	0.038339	0.0431019	0.204314	0.106708	0.0016322
ICT1	turquoise	-0.921941	0	0.921941	0	-0.208399	5.54848e-10	-0.0173784	0.608934	-0.937671	0
NRM	turquoise	0.226719	1.36076e-11	-0.226719	1.36076e-11	-0.385989	2.95583e-32	-0.137018	5.06868e-05	0.283643	1.52675e-17
FLNA	turquoise	0.331155	1.09786e-23	-0.331155	1.09786e-23	-0.532712	7.3655e-65	0.0787	0.0203278	0.380015	3.06825e-31
WDR81	turquoise	0.315118	1.74025e-21	-0.315118	1.74025e-21	-0.406853	5.65735e-36	0.00520226	0.87829	0.345697	8.49924e-26
RARS	turquoise	-0.916122	0	0.916122	0	-0.149114	1.01444e-05	-0.00149502	0.964898	-0.935221	0
VAMP8	turquoise	-0.589752	1.56042e-82	0.589752	1.56042e-82	-0.104687	0.00200082	0.00150692	0.964619	-0.651899	2.77486e-106
PPP1R16B	turquoise	0.108369	0.00137706	-0.108369	0.00137706	-0.157158	3.2378e-06	0.232695	3.77747e-12	0.0798305	0.0185887
GP1BA	turquoise	0.510179	9.19795e-59	-0.510179	9.19795e-59	-0.272152	3.19355e-16	-0.0217369	0.522218	0.572267	9.58638e-77
GNB4	turquoise	-0.196816	4.89046e-09	0.196816	4.89046e-09	0.309812	8.70099e-21	-0.092975	0.00609198	-0.201922	1.90372e-09
MS4A14	turquoise	0.0295097	0.38493	-0.0295097	0.38493	-0.0154323	0.649613	-0.0396765	0.242648	0.0501608	0.139546
IL6R	turquoise	-0.419468	2.35979e-38	0.419468	2.35979e-38	-0.315529	1.53406e-21	-0.00943653	0.781179	-0.367969	2.9716e-29
SCGN	turquoise	0.902324	4.17860960626693e-319	-0.902324	4.17860960626693e-319	0.180633	8.26081e-08	-0.0202126	0.551813	0.889442	4.68407e-297
ADAMTS4	turquoise	0.687633	1.14028e-122	-0.687633	1.14028e-122	0.116763	0.000562885	-0.0156092	0.645871	0.702932	1.96047e-130
DMC1	turquoise	-0.489287	1.6691e-53	0.489287	1.6691e-53	-0.145992	1.55584e-05	-0.0225679	0.506433	-0.518831	4.75128e-61
PTPRN	turquoise	0.757472	1.01505e-162	-0.757472	1.01505e-162	0.0463688	0.172045	-0.0354934	0.295965	0.770434	1.10041e-171
CEBPA	turquoise	0.178719	1.13538e-07	-0.178719	1.13538e-07	-0.051676	0.127966	-0.0681112	0.0447201	0.232513	3.93062e-12
TNFSF14	turquoise	-0.106051	0.00174465	0.106051	0.00174465	-0.282758	1.93954e-17	-0.0667695	0.0491084	-0.0540356	0.111435
SLC25A37	turquoise	0.634046	6.68978e-99	-0.634046	6.68978e-99	0.103071	0.00234896	-0.0519996	0.125592	0.657867	7.28623e-109
CACNA1E	turquoise	-0.156422	3.60309e-06	0.156422	3.60309e-06	-0.201531	2.04797e-09	-0.132743	8.67798e-05	-0.118238	0.000478069
C1orf198	turquoise	0.499762	4.27809e-56	-0.499762	4.27809e-56	-0.141848	2.70794e-05	0.000251328	0.994097	0.552708	1.14231e-70
SHOC2	turquoise	0.840065	1.66936e-232	-0.840065	1.66936e-232	0.551161	3.322e-70	-0.0111874	0.741909	0.818844	3.21134e-211
ZDHHC12	turquoise	0.222137	3.54827e-11	-0.222137	3.54827e-11	-0.194611	7.29321e-09	-0.128838	0.000139867	0.266817	1.24834e-15
BCR	turquoise	0.15979	2.20026e-06	-0.15979	2.20026e-06	-0.426068	1.22151e-39	-0.0258051	0.447413	0.205186	1.02793e-09
MRAS	turquoise	0.48448	2.40938e-52	-0.48448	2.40938e-52	-0.00852951	0.80175	0.0232272	0.494091	0.496998	2.10788e-55
POLE4	turquoise	-0.721023	2.7657e-140	0.721023	2.7657e-140	-0.0411616	0.22545	-0.0651396	0.0549195	-0.766333	8.72629e-169
KIAA0125	turquoise	0.0501465	0.139659	-0.0501465	0.139659	0.0249842	0.461999	-0.108089	0.00141727	0.0237024	0.485296
ST6GALNAC4	turquoise	0.615231	1.25049e-91	-0.615231	1.25049e-91	-0.0992509	0.00340251	-0.0557122	0.100748	0.650363	1.25222e-105
MRPL22	turquoise	-0.301448	1.03023e-19	0.301448	1.03023e-19	0.332866	6.28032e-24	-0.0179862	0.596464	-0.385274	3.92128e-32
IL7R	turquoise	-0.54681	6.49224e-69	0.54681	6.49224e-69	-0.120524	0.000369765	0.109463	0.00122969	-0.595561	1.55186e-84
SMPD3	turquoise	0.326945	4.27496e-23	-0.326945	4.27496e-23	-0.0901736	0.00781863	0.0297973	0.380313	0.334835	3.28754e-24
SPRYD4	turquoise	0.526634	3.60535e-63	-0.526634	3.60535e-63	0.0187241	0.581485	-0.0311783	0.358619	0.527108	2.67013e-63
KLF4	turquoise	0.476066	2.32972e-50	-0.476066	2.32972e-50	0.146881	1.37855e-05	0.0486541	0.151844	0.50287	6.99954e-57
EVL	turquoise	-0.589309	2.20906e-82	0.589309	2.20906e-82	-0.220449	5.02411e-11	0.116105	0.000605086	-0.631995	4.39112e-98
ACAA2	turquoise	0.190966	1.39804e-08	-0.190966	1.39804e-08	0.129073	0.00013595	0.156579	3.52195e-06	0.167693	6.64336e-07
PPARGC1A	turquoise	0.436625	9.3271e-42	-0.436625	9.3271e-42	-0.0394682	0.245133	-0.0709169	0.0366026	0.442021	7.2167e-43
RTKN2	turquoise	0.535481	1.21811e-65	-0.535481	1.21811e-65	0.569908	5.44824e-76	-0.0591095	0.0815973	0.480491	2.13765e-51
HEXDC	turquoise	0.219561	6.02605e-11	-0.219561	6.02605e-11	-0.129734	0.000125506	-0.0639043	0.0596955	0.22666	1.37793e-11
SLC16A10	turquoise	0.275267	1.4203e-16	-0.275267	1.4203e-16	0.252487	4.18738e-14	-0.0736446	0.029948	0.222273	3.44983e-11
MBNL2	turquoise	0.717823	1.73939e-138	-0.717823	1.73939e-138	0.61658	3.9061e-92	0.115605	0.000639091	0.670031	2.60158e-114
PPHLN1	turquoise	-0.949944	0	0.949944	0	-0.187869	2.40607e-08	7.49951e-05	0.998239	-0.955465	0
TIMP1	turquoise	-0.395249	7.13221e-34	0.395249	7.13221e-34	-0.247096	1.48535e-13	0.021877	0.519539	-0.398184	2.1366e-34
RAB6A	turquoise	0.617293	2.10858e-92	-0.617293	2.10858e-92	-0.00763421	0.822192	0.06845	0.0436656	0.619335	3.57127e-93
CR1	turquoise	-0.148856	1.0513e-05	0.148856	1.0513e-05	-0.061657	0.0692652	-0.111579	0.000984995	-0.0826857	0.014763
KLC3	turquoise	0.395196	7.28932e-34	-0.395196	7.28932e-34	-0.143702	2.11728e-05	-0.0784793	0.0206834	0.450302	1.29865e-44
RNF10	turquoise	0.705009	1.58466e-131	-0.705009	1.58466e-131	0.0272717	0.422015	-0.0448773	0.186271	0.734418	4.26532e-148
RALGDS	turquoise	-0.783602	2.03566e-181	0.783602	2.03566e-181	-0.240493	6.7234e-13	0.0878272	0.00958862	-0.80694	1.81238e-200
ABHD10	turquoise	0.557613	3.73047e-72	-0.557613	3.73047e-72	0.652985	9.50199e-107	-0.0497551	0.14278	0.489131	1.82172e-53
GRAMD4	turquoise	0.090682	0.00747597	-0.090682	0.00747597	-0.182055	6.50783e-08	0.0820137	0.0155949	0.132207	9.27264e-05
SLFN5	turquoise	-0.0682741	0.0442103	0.0682741	0.0442103	0.146686	1.41579e-05	0.148237	1.14496e-05	-0.129157	0.000134587
TESC	turquoise	0.537702	2.84331e-66	-0.537702	2.84331e-66	0.0835835	0.0137125	-0.0430692	0.204658	0.554931	2.44031e-71
MBD4	turquoise	-0.483793	3.51522e-52	0.483793	3.51522e-52	-0.118029	0.000489329	0.0262352	0.439876	-0.516331	2.21037e-60
IRF4	turquoise	0.0306782	0.366384	-0.0306782	0.366384	-0.00764891	0.821855	-0.0720558	0.033685	0.0170613	0.615484
CENPK	turquoise	-0.345523	9.02129e-26	0.345523	9.02129e-26	0.369425	1.72731e-29	0.00611439	0.857163	-0.38278	1.04527e-31
E4F1	turquoise	0.128843	0.000139778	-0.128843	0.000139778	-0.227311	1.20053e-11	0.0409652	0.227673	0.145242	1.72173e-05
LOC400958	turquoise	0.726274	2.7221e-143	-0.726274	2.7221e-143	0.127081	0.000172615	-0.00388797	0.908882	0.740109	1.46127e-151
CALML4	turquoise	-0.940389	0	0.940389	0	-0.164771	1.04128e-06	-0.051119	0.132133	-0.938536	0
XRN2	turquoise	0.240672	6.45725e-13	-0.240672	6.45725e-13	0.0224342	0.508956	0.0408494	0.228992	0.276537	1.01786e-16
LSM6	turquoise	0.220769	4.70496e-11	-0.220769	4.70496e-11	0.231503	4.89199e-12	-0.0277249	0.414342	0.193752	8.51167e-09
LGALS3	turquoise	0.503284	5.49244e-57	-0.503284	5.49244e-57	0.112446	0.000898434	-0.0862786	0.0109442	0.506855	6.68284e-58
NUCB2	turquoise	-0.637339	3.16522e-100	0.637339	3.16522e-100	0.15271	6.1321e-06	-0.0117367	0.72972	-0.681505	1.08098e-119
PYHIN1	turquoise	-0.0805683	0.0175252	0.0805683	0.0175252	0.136912	5.1379e-05	0.477474	1.09347e-50	-0.137727	4.62878e-05
DNM2	turquoise	0.19114	1.35569e-08	-0.19114	1.35569e-08	-0.379114	4.34967e-31	-0.0397326	0.241983	0.26651	1.34882e-15
PPIG	turquoise	-0.498354	9.6586e-56	0.498354	9.6586e-56	0.332553	6.95589e-24	-0.0493186	0.146322	-0.56414	3.59496e-74
GBP4	turquoise	0.433058	4.93696e-41	-0.433058	4.93696e-41	0.024737	0.466442	0.0620031	0.0677141	0.431756	9.02552e-41
ATG2A	turquoise	0.645995	8.69675e-104	-0.645995	8.69675e-104	-0.164974	1.00944e-06	-0.0308028	0.364439	0.693678	1.11521e-125
IVL	turquoise	0.890869	2.32105e-299	-0.890869	2.32105e-299	0.113446	0.000807326	-0.0193006	0.569904	0.879901	2.02262e-282
SIRPB1	turquoise	0.8436	2.37078e-236	-0.8436	2.37078e-236	0.0963508	0.00447142	-0.0514887	0.129356	0.879231	1.93239e-281
PPP1R9B	turquoise	-0.931769	0	0.931769	0	-0.379448	3.82218e-31	-0.0492614	0.146791	-0.890166	3.19583e-298
CD3E	turquoise	-0.699302	1.51182e-128	0.699302	1.51182e-128	-0.26575	1.63379e-15	0.0268968	0.428426	-0.722702	3.07549e-141
RBM38	turquoise	0.553735	5.6092e-71	-0.553735	5.6092e-71	0.06342	0.0616595	-0.0336253	0.322132	0.574104	2.45416e-77
NCAPD2	turquoise	0.406004	8.11153e-36	-0.406004	8.11153e-36	-0.282328	2.17794e-17	0.07593	0.0251991	0.441423	9.60506e-43
ALPK1	turquoise	0.333911	4.45728e-24	-0.333911	4.45728e-24	-0.0530778	0.11793	-0.0150287	0.658189	0.395555	6.29416e-34
SPTLC2	turquoise	0.272271	3.0967e-16	-0.272271	3.0967e-16	-0.179952	9.25479e-08	-0.0194894	0.566135	0.339206	7.68281e-25
SULF2	turquoise	0.529504	5.8001e-64	-0.529504	5.8001e-64	-0.085992	0.011213	-0.0095704	0.778155	0.583656	1.78287e-80
AEBP2	turquoise	0.455456	1.00644e-45	-0.455456	1.00644e-45	0.495671	4.50807e-55	0.0316917	0.350756	0.412203	5.69955e-37
IPO8	turquoise	0.54816	2.59254e-69	-0.54816	2.59254e-69	0.123752	0.000255318	0.0539651	0.111904	0.52965	5.28041e-64
C1orf21	turquoise	0.0100329	0.767734	-0.0100329	0.767734	0.0878361	0.00958128	0.5409	3.43269e-67	-0.00873344	0.797113
GALNT6	turquoise	0.16225	1.52489e-06	-0.16225	1.52489e-06	-0.324403	9.61332e-23	0.0107273	0.752167	0.203667	1.37101e-09
DMRTB1	turquoise	0.719101	3.35305e-139	-0.719101	3.35305e-139	0.12381	0.000253592	-0.00368964	0.913512	0.738465	1.49718e-150
CPA5	turquoise	0.22122	4.28744e-11	-0.22122	4.28744e-11	-0.0245476	0.469863	-0.02617	0.441014	0.216157	1.20151e-10
SLC6A6	turquoise	0.326157	5.50113e-23	-0.326157	5.50113e-23	-0.142076	2.6278e-05	-0.00901538	0.790712	0.412572	4.85592e-37
DHRSX	turquoise	-0.397066	3.38678e-34	0.397066	3.38678e-34	-0.21239	2.54412e-10	-0.0496075	0.14397	-0.348704	3.01069e-26
SETX	turquoise	0.152378	6.42701e-06	-0.152378	6.42701e-06	-0.0735257	0.0302147	-0.0226192	0.505468	0.189914	1.68269e-08
ARSA	turquoise	0.419965	1.89253e-38	-0.419965	1.89253e-38	-0.282582	2.03379e-17	-0.0627085	0.0646415	0.480729	1.878e-51
TBC1D7	turquoise	0.600217	3.59623e-86	-0.600217	3.59623e-86	0.0842085	0.0130206	-0.0528827	0.119289	0.607457	9.11709e-89
DHX58	turquoise	-0.326548	4.85483e-23	0.326548	4.85483e-23	-0.312857	3.46884e-21	-0.0759171	0.0252241	-0.335934	2.28619e-24
DRG1	turquoise	-0.906534	0	0.906534	0	-0.18477	4.10554e-08	-0.0277079	0.414629	-0.926761	0
PBX2	turquoise	-0.841232	9.19157e-234	0.841232	9.19157e-234	-0.265811	1.60891e-15	-0.047498	0.161826	-0.834332	1.85721e-226
CIC	turquoise	0.346111	7.37206e-26	-0.346111	7.37206e-26	-0.401678	5.0087e-35	-0.0735963	0.0300562	0.415901	1.13809e-37
SF1	turquoise	-0.627448	2.70714e-96	0.627448	2.70714e-96	-0.21971	5.84615e-11	0.0612567	0.0710948	-0.624221	4.83517e-95
LHFPL2	turquoise	0.352064	9.31643e-27	-0.352064	9.31643e-27	0.0364487	0.283148	-0.132332	9.13056e-05	0.399778	1.10451e-34
MYC	turquoise	-0.0372408	0.27281	0.0372408	0.27281	-0.156549	3.53758e-06	0.0528273	0.119677	-0.0608891	0.0728102
C10orf11	turquoise	0.215019	1.50936e-10	-0.215019	1.50936e-10	-0.0684836	0.0435621	-0.128687	0.00014243	0.241478	5.38197e-13
DPY30	turquoise	-0.739857	2.09107e-151	0.739857	2.09107e-151	0.101378	0.00277241	-0.0405247	0.232717	-0.780578	4.00768e-179
CACNA2D3	turquoise	0.087235	0.0100883	-0.087235	0.0100883	-0.0266758	0.432232	-0.0525153	0.12188	0.103486	0.00225468
ORAOV1	turquoise	0.0144177	0.671255	-0.0144177	0.671255	0.0697704	0.0397542	0.122401	0.000298433	-0.0117383	0.729685
DNAJA4	turquoise	0.864459	3.41328e-261	-0.864459	3.41328e-261	0.204652	1.13773e-09	0.0376563	0.267491	0.865156	4.29753e-262
METTL7A	turquoise	0.636379	7.73063e-100	-0.636379	7.73063e-100	-0.0381567	0.261181	-0.0178419	0.599414	0.640402	1.79206e-101
ARHGAP26	turquoise	0.0475073	0.161743	-0.0475073	0.161743	-0.213024	2.24467e-10	-0.0533408	0.116118	0.120893	0.000354577
POM121	turquoise	-0.756261	6.53671e-162	0.756261	6.53671e-162	-0.397831	2.47177e-34	0.0155405	0.647323	-0.733586	1.34437e-147
MFAP4	turquoise	0.691897	8.75289e-125	-0.691897	8.75289e-125	0.108901	0.00130351	-0.0213238	0.530157	0.701582	9.94642e-130
ZBTB44	turquoise	0.537817	2.63543e-66	-0.537817	2.63543e-66	0.490805	7.1213e-54	0.0664283	0.0502804	0.530375	3.31814e-64
ACSL1	turquoise	0.752844	1.1779e-159	-0.752844	1.1779e-159	0.251432	5.37722e-14	-0.0302745	0.372727	0.767972	6.1609e-170
BTNL8	turquoise	0.0909911	0.00727435	-0.0909911	0.00727435	-0.0641659	0.0586565	-0.086385	0.0108459	0.117986	0.000491633
RIN2	turquoise	0.147716	1.22978e-05	-0.147716	1.22978e-05	0.0692527	0.0412508	0.0283648	0.403647	0.167513	6.83143e-07
IL5RA	turquoise	-0.0194059	0.5678	0.0194059	0.5678	-0.0799706	0.0183826	-0.0116403	0.731855	-0.0221102	0.515096
HLA-DPB1	turquoise	0.522004	6.63099e-62	-0.522004	6.63099e-62	0.176853	1.54326e-07	0.034049	0.316069	0.501354	1.697e-56
TOB1	turquoise	-0.881276	1.88137e-284	0.881276	1.88137e-284	-0.15178	6.99238e-06	0.0168388	0.6201	-0.888517	1.40509e-295
MPZL2	turquoise	0.530397	3.27283e-64	-0.530397	3.27283e-64	0.428093	4.85978e-40	-0.0958918	0.00466603	0.534036	3.12221e-65
ARPC5	turquoise	0.799823	2.16292e-194	-0.799823	2.16292e-194	0.25378	3.07671e-14	0.00150283	0.964715	0.793327	4.67264e-189
UBE3B	turquoise	0.689613	1.20081e-123	-0.689613	1.20081e-123	0.0646804	0.0566563	0.030445	0.37004	0.701974	6.21313e-130
FURIN	turquoise	0.59235	2.0072e-83	-0.59235	2.0072e-83	-0.192539	1.05741e-08	0.0151264	0.65611	0.668173	1.83591e-113
ZFP14	turquoise	0.0815871	0.0161441	-0.0815871	0.0161441	0.134993	6.55235e-05	0.0696211	0.0401809	0.0497513	0.14281
NBPF20	turquoise	-0.170084	4.57238e-07	0.170084	4.57238e-07	0.0920694	0.0066084	0.0734938	0.0302866	-0.23013	6.57655e-12
CCDC53	turquoise	-0.873962	6.30559e-274	0.873962	6.30559e-274	-0.0948314	0.00514518	-0.0151278	0.656079	-0.902867	4.20746303998406e-320
ATP5J2	turquoise	-0.832394	1.82327e-224	0.832394	1.82327e-224	-0.208731	5.20356e-10	-0.0391725	0.248689	-0.856582	2.3734e-251
C1QB	turquoise	-0.19571	5.97929e-09	0.19571	5.97929e-09	-0.12133	0.000337369	0.0414422	0.222301	-0.187728	2.46554e-08
TTLL4	turquoise	0.468908	1.03079e-48	-0.468908	1.03079e-48	-0.231456	4.94169e-12	-0.0408825	0.228615	0.531861	1.27606e-64
ACPT	turquoise	0.484624	2.22568e-52	-0.484624	2.22568e-52	-0.122305	0.000301736	-0.015778	0.642308	0.510173	9.23193e-59
HIST1H2BE	turquoise	0.700703	2.84777e-129	-0.700703	2.84777e-129	-0.0274183	0.419524	-0.091603	0.00688942	0.748746	5.35977e-157
TNFSF10	turquoise	-0.609864	1.20748e-89	0.609864	1.20748e-89	0.00743585	0.826738	-0.0890353	0.0086371	-0.642604	2.22783e-102
PITPNM1	turquoise	-0.83737	1.24152e-229	0.83737	1.24152e-229	-0.299169	1.99264e-19	-0.0220797	0.515676	-0.831919	5.54877e-224
STAG2	turquoise	0.675938	4.73799e-117	-0.675938	4.73799e-117	0.618227	9.37962e-93	-0.0122356	0.71871	0.649103	4.28664e-105
LEP	turquoise	-0.825425	1.64694e-217	0.825425	1.64694e-217	-0.282808	1.91328e-17	-0.0623678	0.0661108	-0.812885	9.66418e-206
FLNB	turquoise	0.32684	4.42043e-23	-0.32684	4.42043e-23	-0.223658	2.58714e-11	-0.0674367	0.0468831	0.330909	1.18929e-23
SAMD4A	turquoise	0.385695	3.31998e-32	-0.385695	3.31998e-32	0.188636	2.10519e-08	-0.0641677	0.0586494	0.380045	3.03348e-31
LSM11	turquoise	-0.923564	0	0.923564	0	-0.120271	0.000380491	2.70292e-05	0.999365	-0.914865	0
ALOX5AP	turquoise	0.408147	3.25873e-36	-0.408147	3.25873e-36	0.0867094	0.010551	0.0174538	0.60738	0.429469	2.58799e-40
TMEM145	turquoise	0.725364	9.14265e-143	-0.725364	9.14265e-143	0.12477	0.000226742	-0.0248627	0.464181	0.741347	2.50605e-152
IPO11	turquoise	0.0128976	0.704186	-0.0128976	0.704186	-0.0891538	0.0085485	0.0490056	0.148904	-0.00980187	0.772935
IL17RD	turquoise	-0.447094	6.23799e-44	0.447094	6.23799e-44	-0.0971389	0.00415434	-0.0309078	0.362806	-0.476188	2.18178e-50
TAX1BP1	turquoise	-0.257676	1.20303e-14	0.257676	1.20303e-14	0.542043	1.60341e-67	-0.0531683	0.117304	-0.328965	2.23249e-23
KISS1R	turquoise	0.258554	9.71554e-15	-0.258554	9.71554e-15	0.0782013	0.021139	-0.118065	0.000487371	0.281318	2.85739e-17
GTF2B	turquoise	-0.825731	8.27413e-218	0.825731	8.27413e-218	-0.0461775	0.173822	-0.0671073	0.0479709	-0.854485	7.8736e-249
DBNDD1	turquoise	0.6062	2.60241e-88	-0.6062	2.60241e-88	-0.0160246	0.637116	-0.0755966	0.0258486	0.602628	4.99989e-87
TXK	turquoise	-0.0165908	0.625261	0.0165908	0.625261	0.139229	3.81369e-05	0.178468	1.18353e-07	-0.0731153	0.0311512
CD300LB	turquoise	0.337213	1.49486e-24	-0.337213	1.49486e-24	-0.211565	2.99318e-10	-0.0766694	0.0238091	0.405014	1.23325e-35
GK5	turquoise	-0.313461	2.88663e-21	0.313461	2.88663e-21	0.305241	3.39251e-20	0.307786	1.595e-20	-0.373019	4.47345e-30
PID1	turquoise	0.41372	2.95011e-37	-0.41372	2.95011e-37	0.0769598	0.0232815	0.0124028	0.71503	0.414076	2.5261e-37
RNF123	turquoise	0.712933	8.73813e-136	-0.712933	8.73813e-136	-0.166366	8.155e-07	-0.0113455	0.738394	0.764739	1.12591e-167
TLE3	turquoise	0.653985	3.52939e-107	-0.653985	3.52939e-107	-0.178236	1.22962e-07	-0.0496173	0.143891	0.720234	7.71597e-140
GSPT1	turquoise	0.619239	3.88464e-93	-0.619239	3.88464e-93	0.158576	2.63167e-06	-0.0346109	0.308143	0.61591	6.96788e-92
IL1RAP	turquoise	0.641598	5.78692e-102	-0.641598	5.78692e-102	0.472257	1.77019e-49	-0.0292591	0.388981	0.649729	2.32766e-105
EIF3D	turquoise	-0.828383	2.00487e-220	0.828383	2.00487e-220	-0.229601	7.36787e-12	-0.00412754	0.903295	-0.85996	1.69175e-255
MRPL15	turquoise	-0.473832	7.67536e-50	0.473832	7.67536e-50	0.228015	1.03362e-11	-0.066127	0.0513345	-0.536341	6.94349e-66
TSPAN5	turquoise	0.59822	1.82188e-85	-0.59822	1.82188e-85	0.0815629	0.0161759	-0.0204353	0.547438	0.61727	2.15196e-92
CCNG2	turquoise	0.690769	3.19881e-124	-0.690769	3.19881e-124	0.550572	4.98206e-70	0.0522361	0.12388	0.682996	2.07109e-120
STOML2	turquoise	-0.915085	0	0.915085	0	-0.27514	1.46853e-16	0.00344118	0.919315	-0.919809	0
KLHL26	turquoise	0.138614	4.12979e-05	-0.138614	4.12979e-05	-0.179729	9.60441e-08	-0.0781106	0.0212894	0.163362	1.28962e-06
AQP10	turquoise	-0.0769161	0.0233602	0.0769161	0.0233602	-0.142869	2.36569e-05	-0.142639	2.43898e-05	-0.0474559	0.162198
SLC43A2	turquoise	0.196571	5.1129e-09	-0.196571	5.1129e-09	-0.284849	1.10018e-17	-0.0790674	0.0197476	0.27442	1.77223e-16
GFI1B	turquoise	0.661697	1.49621e-110	-0.661697	1.49621e-110	-0.220064	5.43683e-11	-0.00387173	0.909261	0.708944	1.26821e-133
CTNNAL1	turquoise	0.515868	2.93283e-60	-0.515868	2.93283e-60	0.354017	4.67997e-27	-0.0326762	0.335986	0.520087	2.18378e-61
KCNMB1	turquoise	0.499125	6.18786e-56	-0.499125	6.18786e-56	0.064902	0.0558124	0.028417	0.402782	0.512751	1.95315e-59
REPS2	turquoise	0.217637	8.91271e-11	-0.217637	8.91271e-11	0.0653803	0.054027	-0.13016	0.000119174	0.291763	1.63212e-18
CMKLR1	turquoise	-0.338254	1.05664e-24	0.338254	1.05664e-24	-0.310879	6.31249e-21	0.259613	7.49896e-15	-0.321547	2.36856e-22
SPNS3	turquoise	0.33371	4.76125e-24	-0.33371	4.76125e-24	-0.188844	2.03012e-08	-0.0585519	0.084521	0.342835	2.25801e-25
[truncated: 954 more rows]
