# Supplementary material for: Identification of Key Ferroptosis-Related Genes in the Peripheral Blood of Patients with Relapsing-Remitting Multiple Sclerosis and Its Diagnostic Value
Source: Int J Mol Sci. 2023 Mar 29;24(7):6399. doi: 10.3390/ijms24076399 (PMC10094542; doi:10.3390/ijms24076399)
Supplement: Supplementary file 1 [file ijms-24-06399-s001.zip › Supplementary File 6.xlsx]

## Sheet: Sheet1
Supplementary File 6. The 50 overlapping RRMS-related module genes.
ACSL4
AKR1C3
ALOX12
ALOX15
ARRDC3
ATG3
ATG5
ATM
CAPG
CBS
CDKN1A
CEBPG
CHMP5
CISD1
CISD2
DDIT3
DDIT4
DPP4
DRD4
EIF2AK4
EPAS1
G6PD
HMGB1
HMOX1
JDP2
JUN
MAP1LC3A
MT1G
MYB
NCF2
NCOA4
PGD
PIK3CA
PRDX1
PTGS2
RB1
SCD
SIRT1
SLC1A5
SLC2A6
SLC2A8
SLC40A1
SLC7A5
SRXN1
TFRC
TLR4
TP53
TXNIP
ULK2
XBP1
