# Supplementary material for: Identification of Key Ferroptosis-Related Genes in the Peripheral Blood of Patients with Relapsing-Remitting Multiple Sclerosis and Its Diagnostic Value
Source: Int J Mol Sci. 2023 Mar 29;24(7):6399. doi: 10.3390/ijms24076399 (PMC10094542; doi:10.3390/ijms24076399)
Supplement: Supplementary file 1 [file ijms-24-06399-s001.zip › Supplementary File 7.xlsx]

## Sheet: GO
Supplementary File 7. GO enrichment analysis results for 50 overlapping RRMS-related module genes.
ONTOLOGY	ID	Description	GeneRatio	BgRatio	pvalue	p.adjust	qvalue	geneID	Count
BP	GO:0062197	cellular response to chemical stress	13/43	332/18800	2.92048e-13	6.32577e-10	3.55991e-10	ATG5/ATM/DDIT3/EPAS1/HMOX1/JUN/MAP1LC3A/PIK3CA/PRDX1/PTGS2/SIRT1/TLR4/TP53	13
BP	GO:0071496	cellular response to external stimulus	10/43	309/18800	1.47658e-09	1.59914e-06	8.99939e-07	ATG5/CBS/CDKN1A/EIF2AK4/HMOX1/MAP1LC3A/PTGS2/SIRT1/TLR4/TP53	10
BP	GO:0010506	regulation of autophagy	10/43	336/18800	3.30604e-09	2.29757e-06	1.29299e-06	ATG5/ATM/CISD1/CISD2/DDIT3/HMOX1/PIK3CA/SIRT1/TP53/ULK2	10
BP	GO:0022411	cellular component disassembly	11/43	460/18800	4.74343e-09	2.29757e-06	1.29299e-06	ATG3/ATG5/CAPG/CHMP5/CISD2/DDIT4/DPP4/MAP1LC3A/PIK3CA/TP53/ULK2	11
BP	GO:0070997	neuron death	10/43	353/18800	5.30372e-09	2.29757e-06	1.29299e-06	ATM/DDIT3/DDIT4/HMOX1/JUN/PIK3CA/RB1/SIRT1/TLR4/TP53	10
BP	GO:0009991	response to extracellular stimulus	11/43	479/18800	7.21806e-09	2.60572e-06	1.46641e-06	ATG5/CBS/CDKN1A/DDIT3/EIF2AK4/HMOX1/MAP1LC3A/PTGS2/SIRT1/TP53/ULK2	11
BP	GO:0042594	response to starvation	8/43	196/18800	1.28338e-08	3.73562e-06	2.10227e-06	ATG5/CDKN1A/DDIT3/EIF2AK4/MAP1LC3A/SIRT1/TP53/ULK2	8
BP	GO:0001666	response to hypoxia	9/43	286/18800	1.37973e-08	3.73562e-06	2.10227e-06	ATM/DDIT4/DPP4/EPAS1/HMOX1/PTGS2/SIRT1/SLC2A8/TP53	9
BP	GO:0036293	response to decreased oxygen levels	9/43	299/18800	2.0262e-08	4.87638e-06	2.74425e-06	ATM/DDIT4/DPP4/EPAS1/HMOX1/PTGS2/SIRT1/SLC2A8/TP53	9
BP	GO:0016236	macroautophagy	9/43	306/18800	2.47373e-08	5.3581e-06	3.01535e-06	ATG3/ATG5/CHMP5/HMOX1/MAP1LC3A/PIK3CA/SIRT1/TP53/ULK2	9
BP	GO:1901214	regulation of neuron death	9/43	313/18800	3.00553e-08	5.91817e-06	3.33053e-06	ATM/DDIT3/DDIT4/HMOX1/JUN/PIK3CA/SIRT1/TLR4/TP53	9
BP	GO:0006979	response to oxidative stress	10/43	433/18800	3.68003e-08	6.19025e-06	3.48365e-06	EPAS1/HMOX1/JUN/MAP1LC3A/PRDX1/PTGS2/SIRT1/TLR4/TP53/TXNIP	10
BP	GO:0070482	response to oxygen levels	9/43	324/18800	4.04383e-08	6.19025e-06	3.48365e-06	ATM/DDIT4/DPP4/EPAS1/HMOX1/PTGS2/SIRT1/SLC2A8/TP53	9
BP	GO:0072593	reactive oxygen species metabolic process	8/43	231/18800	4.60795e-08	6.19025e-06	3.48365e-06	ALOX12/ATG5/CDKN1A/DDIT4/NCF2/PRDX1/TLR4/TP53	8
BP	GO:0000422	autophagy of mitochondrion	6/43	88/18800	4.69442e-08	6.19025e-06	3.48365e-06	ATG3/ATG5/CISD2/MAP1LC3A/TP53/ULK2	6
BP	GO:0061726	mitochondrion disassembly	6/43	88/18800	4.69442e-08	6.19025e-06	3.48365e-06	ATG3/ATG5/CISD2/MAP1LC3A/TP53/ULK2	6
BP	GO:0031667	response to nutrient levels	10/43	446/18800	4.85846e-08	6.19025e-06	3.48365e-06	ATG5/CDKN1A/DDIT3/EIF2AK4/HMOX1/MAP1LC3A/PTGS2/SIRT1/TP53/ULK2	10
BP	GO:0043618	regulation of transcription from RNA polymerase II promoter in response to stress	5/43	47/18800	7.03266e-08	8.27529e-06	4.65704e-06	DDIT3/EPAS1/HMOX1/JUN/TP53	5
BP	GO:0031668	cellular response to extracellular stimulus	8/43	245/18800	7.25902e-08	8.27529e-06	4.65704e-06	ATG5/CBS/CDKN1A/EIF2AK4/HMOX1/MAP1LC3A/SIRT1/TP53	8
BP	GO:0010038	response to metal ion	9/43	351/18800	8.01902e-08	8.68459e-06	4.88738e-06	ALOX15/ATG5/HMOX1/JUN/MAP1LC3A/MT1G/PTGS2/SLC40A1/TXNIP	9
BP	GO:0008630	intrinsic apoptotic signaling pathway in response to DNA damage	6/43	101/18800	1.07396e-07	1.10771e-05	6.23379e-06	ATM/CDKN1A/DDIT4/HMOX1/SIRT1/TP53	6
BP	GO:0006636	unsaturated fatty acid biosynthetic process	5/43	52/18800	1.18154e-07	1.16328e-05	6.54655e-06	ALOX12/ALOX15/PTGS2/SCD/SIRT1	5
BP	GO:0043620	regulation of DNA-templated transcription in response to stress	5/43	53/18800	1.30242e-07	1.22654e-05	6.90255e-06	DDIT3/EPAS1/HMOX1/JUN/TP53	5
BP	GO:0001659	temperature homeostasis	7/43	177/18800	1.40974e-07	1.27229e-05	7.16002e-06	ARRDC3/DDIT3/EPAS1/PTGS2/RB1/SCD/TLR4	7
BP	GO:0034599	cellular response to oxidative stress	8/43	284/18800	2.25316e-07	1.95213e-05	1.09859e-05	EPAS1/HMOX1/JUN/MAP1LC3A/PRDX1/SIRT1/TLR4/TP53	8
BP	GO:0071248	cellular response to metal ion	7/43	191/18800	2.36698e-07	1.97187e-05	1.1097e-05	ALOX15/HMOX1/JUN/MAP1LC3A/MT1G/PTGS2/SLC40A1	7
BP	GO:0097193	intrinsic apoptotic signaling pathway	8/43	295/18800	3.00934e-07	2.41416e-05	1.3586e-05	ATM/CDKN1A/DDIT3/DDIT4/HMOX1/PTGS2/SIRT1/TP53	8
BP	GO:1903008	organelle disassembly	6/43	121/18800	3.14858e-07	2.43565e-05	1.3707e-05	ATG3/ATG5/CISD2/MAP1LC3A/TP53/ULK2	6
BP	GO:0031669	cellular response to nutrient levels	7/43	213/18800	4.94959e-07	3.69683e-05	2.08044e-05	ATG5/CDKN1A/EIF2AK4/HMOX1/MAP1LC3A/SIRT1/TP53	7
BP	GO:0071214	cellular response to abiotic stimulus	8/43	323/18800	5.98193e-07	4.17963e-05	2.35215e-05	ATM/CDKN1A/EIF2AK4/PIK3CA/PTGS2/SIRT1/TLR4/TP53	8
BP	GO:0104004	cellular response to environmental stimulus	8/43	323/18800	5.98193e-07	4.17963e-05	2.35215e-05	ATM/CDKN1A/EIF2AK4/PIK3CA/PTGS2/SIRT1/TLR4/TP53	8
BP	GO:0071241	cellular response to inorganic substance	7/43	221/18800	6.34435e-07	4.29433e-05	2.41669e-05	ALOX15/HMOX1/JUN/MAP1LC3A/MT1G/PTGS2/SLC40A1	7
BP	GO:0010039	response to iron ion	4/43	31/18800	7.13547e-07	4.68346e-05	2.63569e-05	ATG5/HMOX1/MAP1LC3A/SLC40A1	4
BP	GO:0106106	cold-induced thermogenesis	6/43	146/18800	9.52009e-07	5.89157e-05	3.31557e-05	ARRDC3/DDIT3/EPAS1/RB1/SCD/TLR4	6
BP	GO:0120161	regulation of cold-induced thermogenesis	6/43	146/18800	9.52009e-07	5.89157e-05	3.31557e-05	ARRDC3/DDIT3/EPAS1/RB1/SCD/TLR4	6
BP	GO:0051402	neuron apoptotic process	7/43	241/18800	1.13401e-06	6.82295e-05	3.83971e-05	ATM/DDIT3/HMOX1/JUN/PIK3CA/RB1/TP53	7
BP	GO:0051409	response to nitrosative stress	3/43	10/18800	1.32259e-06	7.74249e-05	4.35719e-05	ATG5/ATM/DDIT3	3
BP	GO:1990845	adaptive thermogenesis	6/43	159/18800	1.5671e-06	8.7949e-05	4.94946e-05	ARRDC3/DDIT3/EPAS1/RB1/SCD/TLR4	6
BP	GO:1901216	positive regulation of neuron death	5/43	87/18800	1.58357e-06	8.7949e-05	4.94946e-05	ATM/DDIT3/DDIT4/TLR4/TP53	5
BP	GO:0009267	cellular response to starvation	6/43	160/18800	1.6254e-06	8.80154e-05	4.95319e-05	ATG5/CDKN1A/EIF2AK4/MAP1LC3A/SIRT1/TP53	6
BP	GO:0034644	cellular response to UV	5/43	88/18800	1.67614e-06	8.85491e-05	4.98323e-05	CDKN1A/EIF2AK4/PTGS2/SIRT1/TP53	5
BP	GO:0048660	regulation of smooth muscle cell proliferation	6/43	170/18800	2.31226e-06	0.000119247	6.71078e-05	CDKN1A/HMOX1/JUN/PIK3CA/PTGS2/TLR4	6
BP	GO:0048661	positive regulation of smooth muscle cell proliferation	5/43	95/18800	2.44991e-06	0.000123407	6.94491e-05	HMOX1/JUN/PIK3CA/PTGS2/TLR4	5
BP	GO:0048659	smooth muscle cell proliferation	6/43	173/18800	2.55915e-06	0.00012598	7.08969e-05	CDKN1A/HMOX1/JUN/PIK3CA/PTGS2/TLR4	6
BP	GO:0042771	intrinsic apoptotic signaling pathway in response to DNA damage by p53 class mediator	4/43	43/18800	2.74343e-06	0.000131665	7.40965e-05	CDKN1A/DDIT4/SIRT1/TP53	4
BP	GO:0031056	regulation of histone modification	6/43	176/18800	2.82713e-06	0.000131665	7.40965e-05	ATG5/ATM/JDP2/MYB/SIRT1/TP53	6
BP	GO:0002718	regulation of cytokine production involved in immune response	5/43	98/18800	2.857e-06	0.000131665	7.40965e-05	ATG5/HMOX1/SIRT1/SLC7A5/TLR4	5
BP	GO:0002367	cytokine production involved in immune response	5/43	100/18800	3.15668e-06	0.000142445	8.0163e-05	ATG5/HMOX1/SIRT1/SLC7A5/TLR4	5
BP	GO:0031058	positive regulation of histone modification	5/43	103/18800	3.65194e-06	0.000161431	9.08474e-05	ATM/JDP2/MYB/SIRT1/TP53	5
BP	GO:0120163	negative regulation of cold-induced thermogenesis	4/43	47/18800	3.93886e-06	0.000170431	9.59123e-05	ARRDC3/DDIT3/RB1/TLR4	4
BP	GO:0071478	cellular response to radiation	6/43	187/18800	4.01291e-06	0.000170431	9.59123e-05	ATM/CDKN1A/EIF2AK4/PTGS2/SIRT1/TP53	6
BP	GO:0044804	autophagy of nucleus	3/43	16/18800	6.11323e-06	0.00025464	0.000143302	ATG3/ATG5/ULK2	3
BP	GO:0033559	unsaturated fatty acid metabolic process	5/43	115/18800	6.27433e-06	0.000256419	0.000144303	ALOX12/ALOX15/PTGS2/SCD/SIRT1	5
BP	GO:0000302	response to reactive oxygen species	6/43	203/18800	6.43321e-06	0.000258043	0.000145217	HMOX1/JUN/MAP1LC3A/PRDX1/SIRT1/TXNIP	6
BP	GO:0043523	regulation of neuron apoptotic process	6/43	207/18800	7.19391e-06	0.000283309	0.000159436	ATM/DDIT3/HMOX1/JUN/PIK3CA/TP53	6
BP	GO:0090399	replicative senescence	3/43	17/18800	7.41137e-06	0.000286661	0.000161323	ATM/CDKN1A/TP53	3
BP	GO:0071482	cellular response to light stimulus	5/43	121/18800	8.04516e-06	0.000305716	0.000172046	CDKN1A/EIF2AK4/PTGS2/SIRT1/TP53	5
BP	GO:0006977	DNA damage response, signal transduction by p53 class mediator resulting in cell cycle arrest	3/43	18/18800	8.87947e-06	0.000331602	0.000186614	ATM/CDKN1A/TP53	3
BP	GO:0043467	regulation of generation of precursor metabolites and energy	5/43	134/18800	1.32185e-05	0.000478957	0.00026954	CISD1/DDIT4/PIK3CA/SLC2A6/TP53	5
BP	GO:1901652	response to peptide	8/43	491/18800	1.32675e-05	0.000478957	0.00026954	CHMP5/PIK3CA/PTGS2/RB1/SIRT1/SLC2A8/TLR4/TP53	8
BP	GO:0033002	muscle cell proliferation	6/43	233/18800	1.41169e-05	0.000501267	0.000282095	CDKN1A/HMOX1/JUN/PIK3CA/PTGS2/TLR4	6
BP	GO:0034605	cellular response to heat	4/43	66/18800	1.54219e-05	0.000538771	0.000303201	ATM/HMOX1/PTGS2/SIRT1	4
BP	GO:0055076	transition metal ion homeostasis	5/43	139/18800	1.57857e-05	0.000542729	0.000305428	EPAS1/HMOX1/MT1G/NCOA4/SLC40A1	5
BP	GO:1901653	cellular response to peptide	7/43	361/18800	1.614e-05	0.0005433	0.00030575	CHMP5/PIK3CA/RB1/SIRT1/SLC2A8/TLR4/TP53	7
BP	GO:0032984	protein-containing complex disassembly	6/43	239/18800	1.6304e-05	0.0005433	0.00030575	ATG5/CAPG/CHMP5/DDIT4/MAP1LC3A/PIK3CA	6
BP	GO:0031065	positive regulation of histone deacetylation	3/43	22/18800	1.66512e-05	0.000546462	0.000307529	JDP2/SIRT1/TP53	3
BP	GO:0071456	cellular response to hypoxia	5/43	143/18800	1.81066e-05	0.000585356	0.000329417	EPAS1/HMOX1/PTGS2/SIRT1/TP53	5
BP	GO:0045926	negative regulation of growth	6/43	245/18800	1.87573e-05	0.000597476	0.000336238	CDKN1A/MT1G/RB1/SIRT1/TP53/ULK2	6
BP	GO:0009411	response to UV	5/43	146/18800	2.00153e-05	0.000628306	0.000353588	CDKN1A/EIF2AK4/PTGS2/SIRT1/TP53	5
BP	GO:0030330	DNA damage response, signal transduction by p53 class mediator	4/43	72/18800	2.1796e-05	0.00067443	0.000379545	ATM/CDKN1A/SIRT1/TP53	4
BP	GO:0036294	cellular response to decreased oxygen levels	5/43	151/18800	2.35412e-05	0.000718172	0.000404162	EPAS1/HMOX1/PTGS2/SIRT1/TP53	5
BP	GO:0034976	response to endoplasmic reticulum stress	6/43	257/18800	2.4559e-05	0.000738818	0.00041578	ALOX15/DDIT3/EIF2AK4/JUN/SIRT1/TP53	6
BP	GO:0045786	negative regulation of cell cycle	7/43	387/18800	2.52333e-05	0.000748703	0.000421343	ATM/CDKN1A/EIF2AK4/PTGS2/RB1/SIRT1/TP53	7
BP	GO:0071479	cellular response to ionizing radiation	4/43	75/18800	2.56228e-05	0.000749985	0.000422065	ATM/CDKN1A/SIRT1/TP53	4
BP	GO:0016241	regulation of macroautophagy	5/43	158/18800	2.92689e-05	0.000845285	0.000475696	ATG5/HMOX1/PIK3CA/SIRT1/TP53	5
BP	GO:0072332	intrinsic apoptotic signaling pathway by p53 class mediator	4/43	79/18800	3.14647e-05	0.000896743	0.000504655	CDKN1A/DDIT4/SIRT1/TP53	4
BP	GO:0006633	fatty acid biosynthetic process	5/43	162/18800	3.29959e-05	0.00092817	0.000522341	ALOX12/ALOX15/PTGS2/SCD/SIRT1	5
BP	GO:0010660	regulation of muscle cell apoptotic process	4/43	81/18800	3.47259e-05	0.000961931	0.00054134	ALOX12/HMOX1/SIRT1/TP53	4
BP	GO:0090312	positive regulation of protein deacetylation	3/43	28/18800	3.50843e-05	0.000961931	0.00054134	JDP2/SIRT1/TP53	3
BP	GO:0009410	response to xenobiotic stimulus	7/43	411/18800	3.70398e-05	0.000991584	0.000558028	ATG5/HMOX1/JUN/PTGS2/RB1/TP53/TXNIP	7
BP	GO:0071453	cellular response to oxygen levels	5/43	166/18800	3.70814e-05	0.000991584	0.000558028	EPAS1/HMOX1/PTGS2/SIRT1/TP53	5
BP	GO:0002700	regulation of production of molecular mediator of immune response	5/43	167/18800	3.81615e-05	0.00100745	0.000566957	ATG5/HMOX1/SIRT1/SLC7A5/TLR4	5
BP	GO:0031571	mitotic G1 DNA damage checkpoint signaling	3/43	29/18800	3.90701e-05	0.00100745	0.000566957	ATM/CDKN1A/TP53	3
BP	GO:0061082	myeloid leukocyte cytokine production	3/43	29/18800	3.90701e-05	0.00100745	0.000566957	HMOX1/SIRT1/TLR4	3
BP	GO:0072331	signal transduction by p53 class mediator	5/43	170/18800	4.15489e-05	0.00104522	0.000588211	ATM/CDKN1A/DDIT4/SIRT1/TP53	5
BP	GO:0010657	muscle cell apoptotic process	4/43	85/18800	4.19824e-05	0.00104522	0.000588211	ALOX12/HMOX1/SIRT1/TP53	4
BP	GO:0055072	iron ion homeostasis	4/43	85/18800	4.19824e-05	0.00104522	0.000588211	EPAS1/HMOX1/NCOA4/SLC40A1	4
BP	GO:0044819	mitotic G1/S transition checkpoint signaling	3/43	30/18800	4.33421e-05	0.00105482	0.000593614	ATM/CDKN1A/TP53	3
BP	GO:0071480	cellular response to gamma radiation	3/43	30/18800	4.33421e-05	0.00105482	0.000593614	ATM/CDKN1A/TP53	3
BP	GO:2000134	negative regulation of G1/S transition of mitotic cell cycle	4/43	86/18800	4.39574e-05	0.00105791	0.000595353	ATM/CDKN1A/RB1/TP53	4
BP	GO:0042770	signal transduction in response to DNA damage	5/43	174/18800	4.64229e-05	0.00110497	0.000621836	ATM/CDKN1A/EIF2AK4/SIRT1/TP53	5
BP	GO:0042060	wound healing	7/43	429/18800	4.86076e-05	0.00114439	0.000644023	ALOX12/ALOX15/CDKN1A/CHMP5/HMOX1/PIK3CA/TLR4	7
BP	GO:0009266	response to temperature stimulus	5/43	180/18800	5.45512e-05	0.00126428	0.000711494	ATM/EIF2AK4/HMOX1/PTGS2/SIRT1	5
BP	GO:0090398	cellular senescence	4/43	91/18800	5.48674e-05	0.00126428	0.000711494	ATM/CDKN1A/SIRT1/TP53	4
BP	GO:0030308	negative regulation of cell growth	5/43	186/18800	6.37393e-05	0.00145326	0.000817841	CDKN1A/RB1/SIRT1/TP53/ULK2	5
BP	GO:0016242	negative regulation of macroautophagy	3/43	35/18800	6.93156e-05	0.00152701	0.000859347	HMOX1/PIK3CA/TP53	3
BP	GO:0006909	phagocytosis	6/43	310/18800	6.98557e-05	0.00152701	0.000859347	ALOX15/ATG3/ATG5/NCF2/PIK3CA/TLR4	6
BP	GO:1902807	negative regulation of cell cycle G1/S phase transition	4/43	97/18800	7.04261e-05	0.00152701	0.000859347	ATM/CDKN1A/RB1/TP53	4
BP	GO:0043433	negative regulation of DNA-binding transcription factor activity	5/43	190/18800	7.04991e-05	0.00152701	0.000859347	DDIT3/EIF2AK4/HMOX1/RB1/SIRT1	5
BP	GO:1901654	response to ketone	5/43	190/18800	7.04991e-05	0.00152701	0.000859347	DDIT4/NCOA4/PIK3CA/SIRT1/TXNIP	5
BP	GO:0043516	regulation of DNA damage response, signal transduction by p53 class mediator	3/43	36/18800	7.54966e-05	0.00161907	0.000911153	ATM/SIRT1/TP53	3
BP	GO:0046394	carboxylic acid biosynthetic process	6/43	316/18800	7.76507e-05	0.00164893	0.000927962	ALOX12/ALOX15/CBS/PTGS2/SCD/SIRT1	6
BP	GO:0016053	organic acid biosynthetic process	6/43	318/18800	8.03981e-05	0.0016907	0.000951466	ALOX12/ALOX15/CBS/PTGS2/SCD/SIRT1	6
BP	GO:0071276	cellular response to cadmium ion	3/43	37/18800	8.20273e-05	0.00170838	0.000961413	HMOX1/JUN/MT1G	3
BP	GO:0009612	response to mechanical stimulus	5/43	201/18800	9.19641e-05	0.00189709	0.00106761	JUN/PIK3CA/PTGS2/TLR4/TXNIP	5
BP	GO:0048545	response to steroid hormone	6/43	330/18800	9.85585e-05	0.00201374	0.00113326	DDIT4/NCOA4/PIK3CA/PTGS2/SIRT1/TXNIP	6
BP	GO:0032006	regulation of TOR signaling	4/43	106/18800	9.94782e-05	0.00201374	0.00113326	ATM/DDIT4/PIK3CA/SIRT1	4
BP	GO:0000045	autophagosome assembly	4/43	107/18800	0.00010317	0.00206914	0.00116444	ATG3/ATG5/MAP1LC3A/ULK2	4
BP	GO:0009408	response to heat	4/43	109/18800	0.000110852	0.0022028	0.00123966	ATM/HMOX1/PTGS2/SIRT1	4
BP	GO:0002573	myeloid leukocyte differentiation	5/43	210/18800	0.000113003	0.00222513	0.00125222	JUN/MT1G/RB1/SIRT1/TLR4	5
BP	GO:0006091	generation of precursor metabolites and energy	7/43	494/18800	0.000117671	0.00227987	0.00128303	CISD1/DDIT4/NCF2/PGD/PIK3CA/SLC2A6/TP53	7
BP	GO:0001676	long-chain fatty acid metabolic process	4/43	111/18800	0.000118941	0.00227987	0.00128303	ACSL4/ALOX12/ALOX15/PTGS2	4
BP	GO:1905037	autophagosome organization	4/43	111/18800	0.000118941	0.00227987	0.00128303	ATG3/ATG5/MAP1LC3A/ULK2	4
BP	GO:0072330	monocarboxylic acid biosynthetic process	5/43	215/18800	0.000126187	0.00239756	0.00134926	ALOX12/ALOX15/PTGS2/SCD/SIRT1	5
BP	GO:0031063	regulation of histone deacetylation	3/43	43/18800	0.000129043	0.0024305	0.0013678	JDP2/SIRT1/TP53	3
BP	GO:0000077	DNA damage checkpoint signaling	4/43	115/18800	0.000136391	0.00252499	0.00142097	ATM/CDKN1A/EIF2AK4/TP53	4
BP	GO:0046916	cellular transition metal ion homeostasis	4/43	115/18800	0.000136391	0.00252499	0.00142097	HMOX1/MT1G/NCOA4/SLC40A1	4
BP	GO:0002697	regulation of immune effector process	6/43	353/18800	0.000142443	0.00261467	0.00147144	ATG5/HMOX1/MYB/SIRT1/SLC7A5/TLR4	6
BP	GO:0032620	interleukin-17 production	3/43	45/18800	0.000147905	0.00264763	0.00148999	DDIT3/SLC7A5/TLR4	3
BP	GO:0032660	regulation of interleukin-17 production	3/43	45/18800	0.000147905	0.00264763	0.00148999	DDIT3/SLC7A5/TLR4	3
BP	GO:0060612	adipose tissue development	3/43	45/18800	0.000147905	0.00264763	0.00148999	ARRDC3/PIK3CA/SIRT1	3
BP	GO:0010631	epithelial cell migration	6/43	358/18800	0.00015377	0.00273005	0.00153638	DPP4/HMOX1/JUN/PIK3CA/PTGS2/SIRT1	6
BP	GO:0032007	negative regulation of TOR signaling	3/43	46/18800	0.000157972	0.00278186	0.00156553	ATM/DDIT4/SIRT1	3
BP	GO:0090132	epithelium migration	6/43	361/18800	0.000160903	0.00281061	0.00158171	DPP4/HMOX1/JUN/PIK3CA/PTGS2/SIRT1	6
BP	GO:0006690	icosanoid metabolic process	4/43	121/18800	0.000165946	0.00285269	0.00160539	ALOX12/ALOX15/PTGS2/SIRT1	4
BP	GO:0051101	regulation of DNA binding	4/43	121/18800	0.000165946	0.00285269	0.00160539	DDIT3/HMOX1/JUN/RB1	4
BP	GO:0034198	cellular response to amino acid starvation	3/43	47/18800	0.000168475	0.00287336	0.00161702	CDKN1A/EIF2AK4/MAP1LC3A	3
BP	GO:0090130	tissue migration	6/43	366/18800	0.000173371	0.00293377	0.00165102	DPP4/HMOX1/JUN/PIK3CA/PTGS2/SIRT1	6
BP	GO:0031570	DNA integrity checkpoint signaling	4/43	123/18800	0.000176752	0.00296779	0.00167017	ATM/CDKN1A/EIF2AK4/TP53	4
BP	GO:0002274	myeloid leukocyte activation	5/43	232/18800	0.000180023	0.00299946	0.00168799	ATM/HMOX1/JUN/MT1G/TLR4	5
BP	GO:2001233	regulation of apoptotic signaling pathway	6/43	370/18800	0.000183888	0.00304046	0.00171106	DDIT3/HMOX1/PTGS2/RB1/SIRT1/TP53	6
BP	GO:1990928	response to amino acid starvation	3/43	49/18800	0.000190818	0.00313114	0.00176209	CDKN1A/EIF2AK4/MAP1LC3A	3
BP	GO:1901570	fatty acid derivative biosynthetic process	3/43	50/18800	0.000202674	0.0033007	0.00185751	ACSL4/ALOX12/ALOX15	3
BP	GO:0031929	TOR signaling	4/43	128/18800	0.000205983	0.00330489	0.00185987	ATM/DDIT4/PIK3CA/SIRT1	4
BP	GO:0042542	response to hydrogen peroxide	4/43	128/18800	0.000205983	0.00330489	0.00185987	HMOX1/MAP1LC3A/SIRT1/TXNIP	4
BP	GO:0045348	positive regulation of MHC class II biosynthetic process	2/43	10/18800	0.000227292	0.00354973	0.00199766	SIRT1/TLR4	2
BP	GO:1902237	positive regulation of endoplasmic reticulum stress-induced intrinsic apoptotic signaling pathway	2/43	10/18800	0.000227292	0.00354973	0.00199766	DDIT3/SIRT1	2
BP	GO:0043392	negative regulation of DNA binding	3/43	52/18800	0.000227799	0.00354973	0.00199766	DDIT3/HMOX1/JUN	3
BP	GO:0043525	positive regulation of neuron apoptotic process	3/43	52/18800	0.000227799	0.00354973	0.00199766	ATM/DDIT3/TP53	3
BP	GO:0034101	erythrocyte homeostasis	4/43	133/18800	0.000238552	0.00369074	0.00207702	EPAS1/HMOX1/PRDX1/RB1	4
BP	GO:0002699	positive regulation of immune effector process	5/43	248/18800	0.000245283	0.00376797	0.00212048	HMOX1/MYB/SIRT1/SLC7A5/TLR4	5
BP	GO:0030099	myeloid cell differentiation	6/43	391/18800	0.000247689	0.00377813	0.0021262	EPAS1/JUN/MT1G/RB1/SIRT1/TLR4	6
BP	GO:0006631	fatty acid metabolic process	6/43	395/18800	0.000261611	0.00396259	0.00223	ACSL4/ALOX12/ALOX15/PTGS2/SCD/SIRT1	6
BP	GO:0043470	regulation of carbohydrate catabolic process	3/43	55/18800	0.000269133	0.00399439	0.0022479	DDIT4/SLC2A6/TP53	3
BP	GO:0097352	autophagosome maturation	3/43	55/18800	0.000269133	0.00399439	0.0022479	ATG5/CHMP5/MAP1LC3A	3
BP	GO:0019372	lipoxygenase pathway	2/43	11/18800	0.000277398	0.00399439	0.0022479	ALOX12/ALOX15	2
BP	GO:0043619	regulation of transcription from RNA polymerase II promoter in response to oxidative stress	2/43	11/18800	0.000277398	0.00399439	0.0022479	EPAS1/HMOX1	2
BP	GO:0051574	positive regulation of histone H3-K9 methylation	2/43	11/18800	0.000277398	0.00399439	0.0022479	MYB/SIRT1	2
BP	GO:0071394	cellular response to testosterone stimulus	2/43	11/18800	0.000277398	0.00399439	0.0022479	NCOA4/SIRT1	2
BP	GO:1990440	positive regulation of transcription from RNA polymerase II promoter in response to endoplasmic reticulum stress	2/43	11/18800	0.000277398	0.00399439	0.0022479	DDIT3/TP53	2
BP	GO:1901988	negative regulation of cell cycle phase transition	5/43	255/18800	0.000278919	0.00399439	0.0022479	ATM/CDKN1A/EIF2AK4/RB1/TP53	5
BP	GO:0043254	regulation of protein-containing complex assembly	6/43	401/18800	0.000283645	0.00399439	0.0022479	ALOX15/ATM/CAPG/RB1/TLR4/TP53	6
BP	GO:0010332	response to gamma radiation	3/43	56/18800	0.000283914	0.00399439	0.0022479	ATM/CDKN1A/TP53	3
BP	GO:0071216	cellular response to biotic stimulus	5/43	256/18800	0.000283996	0.00399439	0.0022479	CHMP5/DDIT3/TLR4/TP53/TXNIP	5
BP	GO:0010212	response to ionizing radiation	4/43	142/18800	0.000306283	0.00425262	0.00239323	ATM/CDKN1A/SIRT1/TP53	4
BP	GO:0045598	regulation of fat cell differentiation	4/43	142/18800	0.000306283	0.00425262	0.00239323	DDIT3/JDP2/PTGS2/SIRT1	4
BP	GO:0019369	arachidonic acid metabolic process	3/43	58/18800	0.00031503	0.0043462	0.00244589	ALOX12/ALOX15/PTGS2	3
BP	GO:0045599	negative regulation of fat cell differentiation	3/43	59/18800	0.000331378	0.00436343	0.00245558	DDIT3/JDP2/SIRT1	3
BP	GO:0046686	response to cadmium ion	3/43	59/18800	0.000331378	0.00436343	0.00245558	HMOX1/JUN/MT1G	3
BP	GO:0006983	ER overload response	2/43	12/18800	0.000332394	0.00436343	0.00245558	DDIT3/TP53	2
BP	GO:0006995	cellular response to nitrogen starvation	2/43	12/18800	0.000332394	0.00436343	0.00245558	ATG5/MAP1LC3A	2
BP	GO:0031650	regulation of heat generation	2/43	12/18800	0.000332394	0.00436343	0.00245558	ARRDC3/PTGS2	2
BP	GO:0043562	cellular response to nitrogen levels	2/43	12/18800	0.000332394	0.00436343	0.00245558	ATG5/MAP1LC3A	2
BP	GO:0051095	regulation of helicase activity	2/43	12/18800	0.000332394	0.00436343	0.00245558	SIRT1/TP53	2
BP	GO:0060907	positive regulation of macrophage cytokine production	2/43	12/18800	0.000332394	0.00436343	0.00245558	SIRT1/TLR4	2
BP	GO:0090311	regulation of protein deacetylation	3/43	60/18800	0.000348265	0.00450432	0.00253487	JDP2/SIRT1/TP53	3
BP	GO:0034614	cellular response to reactive oxygen species	4/43	147/18800	0.000349366	0.00450432	0.00253487	JUN/MAP1LC3A/PRDX1/SIRT1	4
BP	GO:2000377	regulation of reactive oxygen species metabolic process	4/43	147/18800	0.000349366	0.00450432	0.00253487	ATG5/CDKN1A/TLR4/TP53	4
BP	GO:0016032	viral process	6/43	418/18800	0.000354098	0.00453832	0.002554	ATG5/CHMP5/EIF2AK4/JUN/SLC1A5/TP53	6
BP	GO:2001244	positive regulation of intrinsic apoptotic signaling pathway	3/43	61/18800	0.000365696	0.0046594	0.00262214	DDIT3/SIRT1/TP53	3
BP	GO:0001894	tissue homeostasis	5/43	272/18800	0.000375203	0.00475258	0.00267458	EPAS1/PRDX1/PTGS2/RB1/TLR4	5
BP	GO:0031392	regulation of prostaglandin biosynthetic process	2/43	13/18800	0.000392259	0.00493973	0.0027799	PTGS2/SIRT1	2
BP	GO:0016052	carbohydrate catabolic process	4/43	152/18800	0.000396629	0.00496589	0.00279462	DDIT4/PGD/SLC2A6/TP53	4
BP	GO:0070059	intrinsic apoptotic signaling pathway in response to endoplasmic reticulum stress	3/43	63/18800	0.000402223	0.00497837	0.00280165	DDIT3/SIRT1/TP53	3
BP	GO:0070542	response to fatty acid	3/43	63/18800	0.000402223	0.00497837	0.00280165	PIK3CA/PTGS2/SCD	3
BP	GO:0072594	establishment of protein localization to organelle	6/43	431/18800	0.000416713	0.00512824	0.00288599	CDKN1A/DDIT3/NCOA4/PTGS2/TP53/TXNIP	6
BP	GO:0030888	regulation of B cell proliferation	3/43	64/18800	0.000421334	0.00512824	0.00288599	ATM/CDKN1A/TLR4	3
BP	GO:0043542	endothelial cell migration	5/43	279/18800	0.000421435	0.00512824	0.00288599	DPP4/HMOX1/PIK3CA/PTGS2/SIRT1	5
BP	GO:1903131	mononuclear cell differentiation	6/43	433/18800	0.00042707	0.00516779	0.00290825	ATG5/ATM/JUN/MT1G/MYB/TP53	6
BP	GO:0048872	homeostasis of number of cells	5/43	282/18800	0.000442516	0.00532494	0.00299669	EPAS1/HMOX1/PRDX1/RB1/SLC40A1	5
BP	GO:0009314	response to radiation	6/43	438/18800	0.000453848	0.00543113	0.00305645	ATM/CDKN1A/EIF2AK4/PTGS2/SIRT1/TP53	6
BP	GO:0090239	regulation of histone H4 acetylation	2/43	14/18800	0.000456971	0.00543846	0.00306057	ATG5/SIRT1	2
BP	GO:0006879	cellular iron ion homeostasis	3/43	66/18800	0.000461285	0.00544333	0.00306331	HMOX1/NCOA4/SLC40A1	3
BP	GO:0002366	leukocyte activation involved in immune response	5/43	285/18800	0.000464385	0.00544333	0.00306331	EIF2AK4/HMOX1/MYB/TLR4/TP53	5
BP	GO:0045936	negative regulation of phosphate metabolic process	6/43	440/18800	0.00046492	0.00544333	0.00306331	CDKN1A/DDIT4/JUN/RB1/SIRT1/TP53	6
BP	GO:0006606	protein import into nucleus	4/43	159/18800	0.000470257	0.00545015	0.00306715	CDKN1A/PTGS2/TP53/TXNIP	4
BP	GO:0010563	negative regulation of phosphorus metabolic process	6/43	441/18800	0.000470534	0.00545015	0.00306715	CDKN1A/DDIT4/JUN/RB1/SIRT1/TP53	6
BP	GO:0002262	myeloid cell homeostasis	4/43	160/18800	0.000481518	0.00551835	0.00310553	EPAS1/HMOX1/PRDX1/RB1	4
BP	GO:2000045	regulation of G1/S transition of mitotic cell cycle	4/43	160/18800	0.000481518	0.00551835	0.00310553	ATM/CDKN1A/RB1/TP53	4
BP	GO:0002263	cell activation involved in immune response	5/43	289/18800	0.000494802	0.00564075	0.00317441	EIF2AK4/HMOX1/MYB/TLR4/TP53	5
BP	GO:0002720	positive regulation of cytokine production involved in immune response	3/43	68/18800	0.000503591	0.00571088	0.00321388	SIRT1/SLC7A5/TLR4	3
BP	GO:0051170	import into nucleus	4/43	163/18800	0.000516455	0.00581847	0.00327442	CDKN1A/PTGS2/TP53/TXNIP	4
BP	GO:0006098	pentose-phosphate shunt	2/43	15/18800	0.000526509	0.00581847	0.00327442	PGD/TP53	2
BP	GO:0035358	regulation of peroxisome proliferator activated receptor signaling pathway	2/43	15/18800	0.000526509	0.00581847	0.00327442	ALOX15/SIRT1	2
BP	GO:0045346	regulation of MHC class II biosynthetic process	2/43	15/18800	0.000526509	0.00581847	0.00327442	SIRT1/TLR4	2
BP	GO:2001279	regulation of unsaturated fatty acid biosynthetic process	2/43	15/18800	0.000526509	0.00581847	0.00327442	PTGS2/SIRT1	2
BP	GO:0051090	regulation of DNA-binding transcription factor activity	6/43	452/18800	0.000535868	0.00589183	0.00331571	DDIT3/EIF2AK4/HMOX1/RB1/SIRT1/TLR4	6
BP	GO:0051100	negative regulation of binding	4/43	165/18800	0.000540726	0.00591522	0.00332887	CDKN1A/DDIT3/HMOX1/JUN	4
BP	GO:0031507	heterochromatin assembly	3/43	71/18800	0.000571589	0.00619031	0.00348369	PIK3CA/RB1/SIRT1	3
BP	GO:2000379	positive regulation of reactive oxygen species metabolic process	3/43	71/18800	0.000571589	0.00619031	0.00348369	CDKN1A/TLR4/TP53	3
BP	GO:0010948	negative regulation of cell cycle process	5/43	301/18800	0.000595125	0.00631769	0.00355537	ATM/CDKN1A/EIF2AK4/RB1/TP53	5
BP	GO:0006801	superoxide metabolic process	3/43	72/18800	0.000595493	0.00631769	0.00355537	ALOX12/NCF2/PRDX1	3
BP	GO:0031649	heat generation	2/43	16/18800	0.000600852	0.00631769	0.00355537	ARRDC3/PTGS2	2
BP	GO:0034349	glial cell apoptotic process	2/43	16/18800	0.000600852	0.00631769	0.00355537	RB1/TP53	2
BP	GO:0035067	negative regulation of histone acetylation	2/43	16/18800	0.000600852	0.00631769	0.00355537	ATG5/SIRT1	2
BP	GO:0045342	MHC class II biosynthetic process	2/43	16/18800	0.000600852	0.00631769	0.00355537	SIRT1/TLR4	2
BP	GO:0000075	cell cycle checkpoint signaling	4/43	170/18800	0.000604947	0.00633003	0.00356231	ATM/CDKN1A/EIF2AK4/TP53	4
BP	GO:2001242	regulation of intrinsic apoptotic signaling pathway	4/43	171/18800	0.000618414	0.00642574	0.00361618	DDIT3/PTGS2/SIRT1/TP53	4
BP	GO:0150076	neuroinflammatory response	3/43	73/18800	0.000620028	0.00642574	0.00361618	ATM/JUN/PTGS2	3
BP	GO:1901568	fatty acid derivative metabolic process	3/43	74/18800	0.0006452	0.00665477	0.00374507	ACSL4/ALOX12/ALOX15	3
BP	GO:0010634	positive regulation of epithelial cell migration	4/43	174/18800	0.000660091	0.0067561	0.00380209	HMOX1/JUN/PTGS2/SIRT1	4
BP	GO:0043536	positive regulation of blood vessel endothelial cell migration	3/43	75/18800	0.000671015	0.0067561	0.00380209	HMOX1/PTGS2/SIRT1	3
BP	GO:0009416	response to light stimulus	5/43	310/18800	0.000679874	0.0067561	0.00380209	CDKN1A/EIF2AK4/PTGS2/SIRT1/TP53	5
BP	GO:0006978	DNA damage response, signal transduction by p53 class mediator resulting in transcription of p21 class mediator	2/43	17/18800	0.000679977	0.0067561	0.00380209	CDKN1A/TP53	2
BP	GO:0010934	macrophage cytokine production	2/43	17/18800	0.000679977	0.0067561	0.00380209	SIRT1/TLR4	2
BP	GO:0010935	regulation of macrophage cytokine production	2/43	17/18800	0.000679977	0.0067561	0.00380209	SIRT1/TLR4	2
BP	GO:0090594	inflammatory response to wounding	2/43	17/18800	0.000679977	0.0067561	0.00380209	HMOX1/TLR4	2
BP	GO:1900034	regulation of cellular response to heat	2/43	17/18800	0.000679977	0.0067561	0.00380209	ATM/SIRT1	2
BP	GO:0001819	positive regulation of cytokine production	6/43	475/18800	0.000695288	0.00685943	0.00386024	DDIT3/HMOX1/PTGS2/SIRT1/SLC7A5/TLR4	6
BP	GO:0061912	selective autophagy	3/43	76/18800	0.000697482	0.00685943	0.00386024	ATG5/TP53/ULK2	3
BP	GO:0002440	production of molecular mediator of immune response	5/43	312/18800	0.000699878	0.00685943	0.00386024	ATG5/HMOX1/SIRT1/SLC7A5/TLR4	5
BP	GO:0018105	peptidyl-serine phosphorylation	5/43	315/18800	0.000730707	0.00712933	0.00401213	ATM/DDIT4/PIK3CA/PTGS2/ULK2	5
BP	GO:0001667	ameboidal-type cell migration	6/43	480/18800	0.000734369	0.00713293	0.00401416	DPP4/HMOX1/JUN/PIK3CA/PTGS2/SIRT1	6
BP	GO:0006740	NADPH regeneration	2/43	18/18800	0.000763864	0.00728503	0.00409976	PGD/TP53	2
BP	GO:0008340	determination of adult lifespan	2/43	18/18800	0.000763864	0.00728503	0.00409976	ATM/TP53	2
BP	GO:0019081	viral translation	2/43	18/18800	0.000763864	0.00728503	0.00409976	ATG5/EIF2AK4	2
BP	GO:0042772	DNA damage response, signal transduction resulting in transcription	2/43	18/18800	0.000763864	0.00728503	0.00409976	CDKN1A/TP53	2
BP	GO:0016049	cell growth	6/43	484/18800	0.000766845	0.00728503	0.00409976	CDKN1A/EIF2AK4/RB1/SIRT1/TP53/ULK2	6
BP	GO:0060249	anatomical structure homeostasis	5/43	319/18800	0.000773384	0.00731506	0.00411665	EPAS1/PRDX1/PTGS2/RB1/TLR4	5
BP	GO:0048145	regulation of fibroblast proliferation	3/43	79/18800	0.00078085	0.00732174	0.00412041	CDKN1A/JUN/TP53	3
BP	GO:0070828	heterochromatin organization	3/43	79/18800	0.00078085	0.00732174	0.00412041	PIK3CA/RB1/SIRT1	3
BP	GO:0090066	regulation of anatomical structure size	6/43	487/18800	0.000791926	0.00737799	0.00415207	ALOX15/ATG5/CAPG/PIK3CA/PTGS2/ULK2	6
BP	GO:0006109	regulation of carbohydrate metabolic process	4/43	183/18800	0.000797069	0.00737799	0.00415207	DDIT4/SIRT1/SLC2A6/TP53	4
BP	GO:1901991	negative regulation of mitotic cell cycle phase transition	4/43	183/18800	0.000797069	0.00737799	0.00415207	ATM/CDKN1A/RB1/TP53	4
BP	GO:0045814	negative regulation of gene expression, epigenetic	3/43	80/18800	0.000809985	0.00746565	0.0042014	PIK3CA/RB1/SIRT1	3
BP	GO:0044773	mitotic DNA damage checkpoint signaling	3/43	81/18800	0.000839802	0.00764291	0.00430115	ATM/CDKN1A/TP53	3
BP	GO:0045445	myoblast differentiation	3/43	81/18800	0.000839802	0.00764291	0.00430115	DDIT3/EPAS1/RB1	3
BP	GO:0048144	fibroblast proliferation	3/43	81/18800	0.000839802	0.00764291	0.00430115	CDKN1A/JUN/TP53	3
BP	GO:2000269	regulation of fibroblast apoptotic process	2/43	19/18800	0.000852492	0.00766572	0.00431399	PIK3CA/TP53	2
BP	GO:2000757	negative regulation of peptidyl-lysine acetylation	2/43	19/18800	0.000852492	0.00766572	0.00431399	ATG5/SIRT1	2
BP	GO:0016570	histone modification	6/43	494/18800	0.000852926	0.00766572	0.00431399	ATG5/ATM/JDP2/MYB/SIRT1/TP53	6
BP	GO:0007033	vacuole organization	4/43	188/18800	0.000881287	0.00785542	0.00442075	ATG3/ATG5/MAP1LC3A/ULK2	4
BP	GO:1902806	regulation of cell cycle G1/S phase transition	4/43	188/18800	0.000881287	0.00785542	0.00442075	ATM/CDKN1A/RB1/TP53	4
BP	GO:0010288	response to lead ion	2/43	20/18800	0.00094584	0.008328	0.0046867	MAP1LC3A/PTGS2	2
BP	GO:0043651	linoleic acid metabolic process	2/43	20/18800	0.00094584	0.008328	0.0046867	ALOX12/ALOX15	2
BP	GO:0043984	histone H4-K16 acetylation	2/43	20/18800	0.00094584	0.008328	0.0046867	ATG5/SIRT1	2
BP	GO:0010507	negative regulation of autophagy	3/43	85/18800	0.000966031	0.00843719	0.00474815	HMOX1/PIK3CA/TP53	3
BP	GO:0044774	mitotic DNA integrity checkpoint signaling	3/43	85/18800	0.000966031	0.00843719	0.00474815	ATM/CDKN1A/TP53	3
BP	GO:0031334	positive regulation of protein-containing complex assembly	4/43	194/18800	0.000990423	0.00858103	0.00482909	ALOX15/ATM/TLR4/TP53	4
BP	GO:0071897	DNA biosynthetic process	4/43	194/18800	0.000990423	0.00858103	0.00482909	ATM/CDKN1A/SIRT1/TP53	4
BP	GO:1904705	regulation of vascular associated smooth muscle cell proliferation	3/43	86/18800	0.000999359	0.00861333	0.00484727	CDKN1A/HMOX1/JUN	3
BP	GO:0018209	peptidyl-serine modification	5/43	338/18800	0.0010021	0.00861333	0.00484727	ATM/DDIT4/PIK3CA/PTGS2/ULK2	5
BP	GO:1990874	vascular associated smooth muscle cell proliferation	3/43	87/18800	0.00103341	0.00884728	0.00497893	CDKN1A/HMOX1/JUN	3
BP	GO:0001933	negative regulation of protein phosphorylation	5/43	341/18800	0.00104237	0.00886689	0.00498997	CDKN1A/DDIT4/JUN/RB1/SIRT1	5
BP	GO:0036092	phosphatidylinositol-3-phosphate biosynthetic process	2/43	21/18800	0.00104389	0.00886689	0.00498997	ATM/PIK3CA	2
BP	GO:0062012	regulation of small molecule metabolic process	5/43	342/18800	0.00105606	0.00893527	0.00502845	DDIT4/PTGS2/SIRT1/SLC2A6/TP53	5
BP	GO:1903578	regulation of ATP metabolic process	3/43	89/18800	0.00110369	0.00930192	0.00523479	DDIT4/SLC2A6/TP53	3
BP	GO:0002285	lymphocyte activation involved in immune response	4/43	201/18800	0.0011294	0.00933667	0.00525435	EIF2AK4/MYB/TLR4/TP53	4
BP	GO:0032700	negative regulation of interleukin-17 production	2/43	22/18800	0.00114661	0.00933667	0.00525435	DDIT3/TLR4	2
BP	GO:0032780	negative regulation of ATP-dependent activity	2/43	22/18800	0.00114661	0.00933667	0.00525435	SIRT1/TP53	2
BP	GO:0035357	peroxisome proliferator activated receptor signaling pathway	2/43	22/18800	0.00114661	0.00933667	0.00525435	ALOX15/SIRT1	2
BP	GO:0044346	fibroblast apoptotic process	2/43	22/18800	0.00114661	0.00933667	0.00525435	PIK3CA/TP53	2
BP	GO:0050765	negative regulation of phagocytosis	2/43	22/18800	0.00114661	0.00933667	0.00525435	ATG3/ATG5	2
BP	GO:0061081	positive regulation of myeloid leukocyte cytokine production involved in immune response	2/43	22/18800	0.00114661	0.00933667	0.00525435	SIRT1/TLR4	2
BP	GO:0090335	regulation of brown fat cell differentiation	2/43	22/18800	0.00114661	0.00933667	0.00525435	PTGS2/SIRT1	2
BP	GO:0140467	integrated stress response signaling	2/43	22/18800	0.00114661	0.00933667	0.00525435	DDIT3/EIF2AK4	2
BP	GO:0031497	chromatin assembly	4/43	205/18800	0.00121469	0.00981726	0.0055248	PIK3CA/RB1/SIRT1/TP53	4
BP	GO:0032869	cellular response to insulin stimulus	4/43	205/18800	0.00121469	0.00981726	0.0055248	PIK3CA/RB1/SIRT1/SLC2A8	4
BP	GO:0030728	ovulation	2/43	23/18800	0.00125399	0.0100598	0.00566128	PTGS2/SIRT1	2
BP	GO:1901984	negative regulation of protein acetylation	2/43	23/18800	0.00125399	0.0100598	0.00566128	ATG5/SIRT1	2
BP	GO:1901655	cellular response to ketone	3/43	94/18800	0.00129243	0.0103299	0.00581329	DDIT4/NCOA4/SIRT1	3
BP	GO:1901215	negative regulation of neuron death	4/43	209/18800	0.00130441	0.0103873	0.0058456	HMOX1/JUN/PIK3CA/SIRT1	4
BP	GO:0017038	protein import	4/43	210/18800	0.00132754	0.0105328	0.00592748	CDKN1A/PTGS2/TP53/TXNIP	4
BP	GO:0015711	organic anion transport	5/43	361/18800	0.00134242	0.010612	0.00597203	DRD4/SLC1A5/SLC2A6/SLC2A8/SLC7A5	5
BP	GO:0035994	response to muscle stretch	2/43	24/18800	0.001366	0.010643	0.00598953	JUN/PIK3CA	2
BP	GO:0036003	positive regulation of transcription from RNA polymerase II promoter in response to stress	2/43	24/18800	0.001366	0.010643	0.00598953	DDIT3/TP53	2
BP	GO:0051156	glucose 6-phosphate metabolic process	2/43	24/18800	0.001366	0.010643	0.00598953	PGD/TP53	2
BP	GO:1901522	positive regulation of transcription from RNA polymerase II promoter involved in cellular response to chemical stimulus	2/43	24/18800	0.001366	0.010643	0.00598953	JUN/TP53	2
BP	GO:0051098	regulation of binding	5/43	366/18800	0.0014265	0.0110745	0.00623234	CDKN1A/DDIT3/HMOX1/JUN/RB1	5
BP	GO:0016575	histone deacetylation	3/43	98/18800	0.0014572	0.0112725	0.00634375	JDP2/SIRT1/TP53	3
BP	GO:0051570	regulation of histone H3-K9 methylation	2/43	25/18800	0.00148264	0.0114284	0.00643151	MYB/SIRT1	2
BP	GO:0050764	regulation of phagocytosis	3/43	99/18800	0.00150035	0.011524	0.00648529	ALOX15/ATG3/ATG5	3
BP	GO:0051251	positive regulation of lymphocyte activation	5/43	371/18800	0.00151441	0.0115909	0.00652292	CDKN1A/DPP4/MYB/PIK3CA/TLR4	5
BP	GO:0071900	regulation of protein serine/threonine kinase activity	5/43	372/18800	0.00153246	0.0116877	0.00657744	CDKN1A/DRD4/RB1/SIRT1/TLR4	5
BP	GO:0019080	viral gene expression	3/43	100/18800	0.0015443	0.0116957	0.0065819	ATG5/EIF2AK4/JUN	3
BP	GO:0042100	B cell proliferation	3/43	100/18800	0.0015443	0.0116957	0.0065819	ATM/CDKN1A/TLR4	3
BP	GO:0062014	negative regulation of small molecule metabolic process	3/43	102/18800	0.00163461	0.0123365	0.00694253	DDIT4/SIRT1/TP53	3
BP	GO:1901796	regulation of signal transduction by p53 class mediator	3/43	103/18800	0.00168098	0.0126086	0.0070957	ATM/SIRT1/TP53	3
BP	GO:0046777	protein autophosphorylation	4/43	224/18800	0.00168232	0.0126086	0.0070957	ATM/EIF2AK4/JUN/ULK2	4
BP	GO:0000082	G1/S transition of mitotic cell cycle	4/43	225/18800	0.00170994	0.012743	0.00717131	ATM/CDKN1A/RB1/TP53	4
BP	GO:0042326	negative regulation of phosphorylation	5/43	382/18800	0.00172186	0.012743	0.00717131	CDKN1A/DDIT4/JUN/RB1/SIRT1	5
BP	GO:0001963	synaptic transmission, dopaminergic	2/43	27/18800	0.00172966	0.012743	0.00717131	DRD4/PTGS2	2
BP	GO:0071280	cellular response to copper ion	2/43	27/18800	0.00172966	0.012743	0.00717131	MAP1LC3A/MT1G	2
BP	GO:2000108	positive regulation of leukocyte apoptotic process	2/43	27/18800	0.00172966	0.012743	0.00717131	SIRT1/TP53	2
BP	GO:0042116	macrophage activation	3/43	106/18800	0.00182501	0.0133999	0.00754099	ATM/JUN/TLR4	3
BP	GO:2001234	negative regulation of apoptotic signaling pathway	4/43	230/18800	0.00185282	0.0135581	0.00763003	HMOX1/PTGS2/RB1/SIRT1	4
BP	GO:1902749	regulation of cell cycle G2/M phase transition	3/43	108/18800	0.00192519	0.0140402	0.00790134	ATM/CDKN1A/TP53	3
BP	GO:0050727	regulation of inflammatory response	5/43	394/18800	0.00197128	0.0142923	0.00804318	ALOX15/ATM/PTGS2/RB1/TLR4	5
BP	GO:0045930	negative regulation of mitotic cell cycle	4/43	234/18800	0.00197294	0.0142923	0.00804318	ATM/CDKN1A/RB1/TP53	4
BP	GO:0042759	long-chain fatty acid biosynthetic process	2/43	29/18800	0.0019949	0.0144032	0.00810558	ALOX12/ALOX15	2
BP	GO:0045860	positive regulation of protein kinase activity	5/43	396/18800	0.00201529	0.0145021	0.00816125	CDKN1A/DRD4/PIK3CA/SIRT1/TLR4	5
BP	GO:0045444	fat cell differentiation	4/43	237/18800	0.0020665	0.0148214	0.00834093	DDIT3/JDP2/PTGS2/SIRT1	4
BP	GO:0001938	positive regulation of endothelial cell proliferation	3/43	111/18800	0.00208178	0.0148816	0.00837486	HMOX1/JUN/SIRT1	3
BP	GO:1903579	negative regulation of ATP metabolic process	2/43	30/18800	0.00213429	0.0152068	0.00855786	DDIT4/TP53	2
BP	GO:0043434	response to peptide hormone	5/43	404/18800	0.0021986	0.0156137	0.00878682	PIK3CA/PTGS2/RB1/SIRT1/SLC2A8	5
BP	GO:0002286	T cell activation involved in immune response	3/43	116/18800	0.00235999	0.016705	0.009401	EIF2AK4/MYB/TP53	3
BP	GO:0032609	interferon-gamma production	3/43	117/18800	0.00241826	0.016792	0.00944992	DDIT3/SLC7A5/TLR4	3
BP	GO:0032649	regulation of interferon-gamma production	3/43	117/18800	0.00241826	0.016792	0.00944992	DDIT3/SLC7A5/TLR4	3
BP	GO:0001516	prostaglandin biosynthetic process	2/43	32/18800	0.00242654	0.016792	0.00944992	PTGS2/SIRT1	2
BP	GO:0010165	response to X-ray	2/43	32/18800	0.00242654	0.016792	0.00944992	ATM/TP53	2
BP	GO:0046457	prostanoid biosynthetic process	2/43	32/18800	0.00242654	0.016792	0.00944992	PTGS2/SIRT1	2
BP	GO:1902235	regulation of endoplasmic reticulum stress-induced intrinsic apoptotic signaling pathway	2/43	32/18800	0.00242654	0.016792	0.00944992	DDIT3/SIRT1	2
BP	GO:1902253	regulation of intrinsic apoptotic signaling pathway by p53 class mediator	2/43	32/18800	0.00242654	0.016792	0.00944992	SIRT1/TP53	2
BP	GO:0001558	regulation of cell growth	5/43	415/18800	0.00247023	0.0169277	0.00952631	CDKN1A/RB1/SIRT1/TP53/ULK2	5
BP	GO:1901987	regulation of cell cycle phase transition	5/43	415/18800	0.00247023	0.0169277	0.00952631	ATM/CDKN1A/EIF2AK4/RB1/TP53	5
BP	GO:0006476	protein deacetylation	3/43	118/18800	0.00247742	0.0169277	0.00952631	JDP2/SIRT1/TP53	3
BP	GO:0008286	insulin receptor signaling pathway	3/43	118/18800	0.00247742	0.0169277	0.00952631	PIK3CA/SIRT1/SLC2A8	3
BP	GO:2000278	regulation of DNA biosynthetic process	3/43	119/18800	0.00253746	0.0172835	0.00972652	ATM/CDKN1A/TP53	3
BP	GO:0001662	behavioral fear response	2/43	33/18800	0.00257935	0.0174046	0.00979469	DPP4/DRD4	2
BP	GO:0032633	interleukin-4 production	2/43	33/18800	0.00257935	0.0174046	0.00979469	DDIT3/SLC7A5	2
BP	GO:0032673	regulation of interleukin-4 production	2/43	33/18800	0.00257935	0.0174046	0.00979469	DDIT3/SLC7A5	2
BP	GO:0002702	positive regulation of production of molecular mediator of immune response	3/43	120/18800	0.00259841	0.0174787	0.0098364	SIRT1/SLC7A5/TLR4	3
BP	GO:0002696	positive regulation of leukocyte activation	5/43	421/18800	0.00262832	0.0176252	0.00991882	CDKN1A/DPP4/MYB/PIK3CA/TLR4	5
BP	GO:0044843	cell cycle G1/S phase transition	4/43	255/18800	0.00269335	0.0180056	0.0101329	ATM/CDKN1A/RB1/TP53	4
BP	GO:0071901	negative regulation of protein serine/threonine kinase activity	3/43	122/18800	0.00272299	0.0181343	0.0102053	CDKN1A/RB1/SIRT1	3
BP	GO:0002209	behavioral defense response	2/43	34/18800	0.0027366	0.0181343	0.0102053	DPP4/DRD4	2
BP	GO:0002683	negative regulation of immune system process	5/43	425/18800	0.00273772	0.0181343	0.0102053	ALOX15/ATM/DPP4/HMOX1/TLR4	5
BP	GO:0032868	response to insulin	4/43	259/18800	0.00284857	0.018811	0.0105861	PIK3CA/RB1/SIRT1/SLC2A8	4
BP	GO:0061448	connective tissue development	4/43	260/18800	0.00288831	0.0189085	0.010641	ARRDC3/PIK3CA/RB1/SIRT1	4
BP	GO:0007095	mitotic G2 DNA damage checkpoint signaling	2/43	35/18800	0.00289825	0.0189085	0.010641	ATM/CDKN1A	2
BP	GO:0090050	positive regulation of cell migration involved in sprouting angiogenesis	2/43	35/18800	0.00289825	0.0189085	0.010641	HMOX1/PTGS2	2
BP	GO:1905898	positive regulation of response to endoplasmic reticulum stress	2/43	35/18800	0.00289825	0.0189085	0.010641	DDIT3/SIRT1	2
BP	GO:0043244	regulation of protein-containing complex disassembly	3/43	125/18800	0.00291671	0.0189717	0.0106766	ATG5/CAPG/PIK3CA	3
BP	GO:0005996	monosaccharide metabolic process	4/43	261/18800	0.00292843	0.018991	0.0106874	PGD/PIK3CA/SIRT1/TP53	4
BP	GO:0048608	reproductive structure development	5/43	433/18800	0.00296644	0.01918	0.0107938	ATM/EPAS1/NCOA4/PTGS2/SIRT1	5
BP	GO:0003018	vascular process in circulatory system	4/43	263/18800	0.00300982	0.0194026	0.0109191	ATG5/PTGS2/SLC1A5/SLC7A5	4
BP	GO:0030522	intracellular receptor signaling pathway	4/43	264/18800	0.00305109	0.0195213	0.0109859	ALOX15/NCOA4/SIRT1/TLR4	4
BP	GO:0050867	positive regulation of cell activation	5/43	436/18800	0.00305569	0.0195213	0.0109859	CDKN1A/DPP4/MYB/PIK3CA/TLR4	5
BP	GO:0061458	reproductive system development	5/43	436/18800	0.00305569	0.0195213	0.0109859	ATM/EPAS1/NCOA4/PTGS2/SIRT1	5
BP	GO:0030224	monocyte differentiation	2/43	36/18800	0.00306429	0.0195213	0.0109859	JUN/MT1G	2
BP	GO:0035601	protein deacylation	3/43	129/18800	0.00318792	0.0202494	0.0113956	JDP2/SIRT1/TP53	3
BP	GO:0006739	NADP metabolic process	2/43	37/18800	0.00323471	0.0203083	0.0114288	PGD/TP53	2
BP	GO:0042596	fear response	2/43	37/18800	0.00323471	0.0203083	0.0114288	DPP4/DRD4	2
BP	GO:0045454	cell redox homeostasis	2/43	37/18800	0.00323471	0.0203083	0.0114288	DDIT3/PRDX1	2
BP	GO:2000279	negative regulation of DNA biosynthetic process	2/43	37/18800	0.00323471	0.0203083	0.0114288	CDKN1A/TP53	2
BP	GO:0007093	mitotic cell cycle checkpoint signaling	3/43	130/18800	0.00325807	0.0203371	0.011445	ATM/CDKN1A/TP53	3
BP	GO:0030168	platelet activation	3/43	130/18800	0.00325807	0.0203371	0.011445	ALOX12/PIK3CA/TLR4	3
BP	GO:0051348	negative regulation of transferase activity	4/43	270/18800	0.0033069	0.0205826	0.0115832	CDKN1A/RB1/SIRT1/TP53	4
BP	GO:0010595	positive regulation of endothelial cell migration	3/43	131/18800	0.00332915	0.0206617	0.0116277	HMOX1/PTGS2/SIRT1	3
BP	GO:0045785	positive regulation of cell adhesion	5/43	446/18800	0.00336727	0.0208386	0.0117272	ALOX15/ATM/DPP4/MYB/PIK3CA	5
BP	GO:0098732	macromolecule deacylation	3/43	133/18800	0.00347417	0.0214389	0.012065	JDP2/SIRT1/TP53	3
BP	GO:0001889	liver development	3/43	134/18800	0.00354811	0.0217711	0.012252	HMOX1/JUN/PIK3CA	3
BP	GO:2001235	positive regulation of apoptotic signaling pathway	3/43	134/18800	0.00354811	0.0217711	0.012252	DDIT3/SIRT1/TP53	3
BP	GO:0051567	histone H3-K9 methylation	2/43	39/18800	0.00358857	0.0219572	0.0123567	MYB/SIRT1	2
BP	GO:0010508	positive regulation of autophagy	3/43	136/18800	0.00369887	0.0225683	0.0127006	HMOX1/SIRT1/ULK2	3
BP	GO:0044275	cellular carbohydrate catabolic process	2/43	40/18800	0.00377198	0.022844	0.0128558	PGD/TP53	2
BP	GO:0097009	energy homeostasis	2/43	40/18800	0.00377198	0.022844	0.0128558	PIK3CA/SIRT1	2
BP	GO:0061008	hepaticobiliary system development	3/43	137/18800	0.0037757	0.022844	0.0128558	HMOX1/JUN/PIK3CA	3
BP	GO:0051384	response to glucocorticoid	3/43	139/18800	0.00393227	0.0234977	0.0132237	DDIT4/PIK3CA/PTGS2	3
BP	GO:0009299	mRNA transcription	2/43	41/18800	0.00395968	0.0234977	0.0132237	EPAS1/TP53	2
BP	GO:0033574	response to testosterone	2/43	41/18800	0.00395968	0.0234977	0.0132237	NCOA4/SIRT1	2
BP	GO:0045429	positive regulation of nitric oxide biosynthetic process	2/43	41/18800	0.00395968	0.0234977	0.0132237	PTGS2/TLR4	2
BP	GO:0046688	response to copper ion	2/43	41/18800	0.00395968	0.0234977	0.0132237	MAP1LC3A/MT1G	2
BP	GO:0071548	response to dexamethasone	2/43	41/18800	0.00395968	0.0234977	0.0132237	DDIT4/PIK3CA	2
BP	GO:0150077	regulation of neuroinflammatory response	2/43	41/18800	0.00395968	0.0234977	0.0132237	ATM/PTGS2	2
BP	GO:0051051	negative regulation of transport	5/43	464/18800	0.00398513	0.0235841	0.0132723	ATG3/ATG5/DRD4/HMOX1/PTGS2	5
BP	GO:0044403	biological process involved in symbiotic interaction	4/43	286/18800	0.00406	0.0239617	0.0134848	CHMP5/EIF2AK4/JUN/SLC1A5	4
BP	GO:0040029	regulation of gene expression, epigenetic	3/43	141/18800	0.00409276	0.0240895	0.0135567	PIK3CA/RB1/SIRT1	3
BP	GO:0044262	cellular carbohydrate metabolic process	4/43	287/18800	0.00411061	0.0241289	0.0135789	DDIT4/PGD/SIRT1/TP53	4
BP	GO:0030890	positive regulation of B cell proliferation	2/43	42/18800	0.00415165	0.0241733	0.0136039	CDKN1A/TLR4	2
BP	GO:0032689	negative regulation of interferon-gamma production	2/43	42/18800	0.00415165	0.0241733	0.0136039	DDIT3/TLR4	2
BP	GO:1904706	negative regulation of vascular associated smooth muscle cell proliferation	2/43	42/18800	0.00415165	0.0241733	0.0136039	CDKN1A/HMOX1	2
BP	GO:0035264	multicellular organism growth	3/43	143/18800	0.0042572	0.0247005	0.0139006	ATM/PIK3CA/TP53	3
BP	GO:0010632	regulation of epithelial cell migration	4/43	290/18800	0.004265	0.0247005	0.0139006	HMOX1/JUN/PTGS2/SIRT1	4
BP	GO:0051052	regulation of DNA metabolic process	5/43	472/18800	0.00428436	0.0247465	0.0139264	ATM/CDKN1A/PIK3CA/SIRT1/TP53	5
BP	GO:0033135	regulation of peptidyl-serine phosphorylation	3/43	144/18800	0.0043409	0.0248483	0.0139837	DDIT4/PIK3CA/PTGS2	3
BP	GO:0051592	response to calcium ion	3/43	144/18800	0.0043409	0.0248483	0.0139837	ALOX15/JUN/TXNIP	3
BP	GO:0042554	superoxide anion generation	2/43	43/18800	0.00434788	0.0248483	0.0139837	ALOX12/NCF2	2
BP	GO:1904407	positive regulation of nitric oxide metabolic process	2/43	43/18800	0.00434788	0.0248483	0.0139837	PTGS2/TLR4	2
BP	GO:0043524	negative regulation of neuron apoptotic process	3/43	145/18800	0.00442561	0.0252259	0.0141963	HMOX1/JUN/PIK3CA	3
BP	GO:0033674	positive regulation of kinase activity	5/43	476/18800	0.00443988	0.0252409	0.0142047	CDKN1A/DRD4/PIK3CA/SIRT1/TLR4	5
BP	GO:0034504	protein localization to nucleus	4/43	294/18800	0.00447692	0.0253186	0.0142484	CDKN1A/PTGS2/TP53/TXNIP	4
BP	GO:0071375	cellular response to peptide hormone stimulus	4/43	294/18800	0.00447692	0.0253186	0.0142484	PIK3CA/RB1/SIRT1/SLC2A8	4
BP	GO:0007346	regulation of mitotic cell cycle	5/43	478/18800	0.00451914	0.0254908	0.0143453	ATM/CDKN1A/RB1/SIRT1/TP53	5
BP	GO:0046651	lymphocyte proliferation	4/43	296/18800	0.0045855	0.0257979	0.0145181	ATM/CDKN1A/TLR4/TP53	4
BP	GO:0051053	negative regulation of DNA metabolic process	3/43	148/18800	0.00468573	0.026196	0.0147422	ATM/CDKN1A/TP53	3
BP	GO:0006110	regulation of glycolytic process	2/43	45/18800	0.00475301	0.026196	0.0147422	DDIT4/SLC2A6	2
BP	GO:0006984	ER-nucleus signaling pathway	2/43	45/18800	0.00475301	0.026196	0.0147422	DDIT3/TP53	2
BP	GO:0030835	negative regulation of actin filament depolymerization	2/43	45/18800	0.00475301	0.026196	0.0147422	CAPG/PIK3CA	2
BP	GO:0031295	T cell costimulation	2/43	45/18800	0.00475301	0.026196	0.0147422	DPP4/PIK3CA	2
BP	GO:0051180	vitamin transport	2/43	45/18800	0.00475301	0.026196	0.0147422	SLC2A6/SLC2A8	2
BP	GO:0089718	amino acid import across plasma membrane	2/43	45/18800	0.00475301	0.026196	0.0147422	SLC1A5/SLC7A5	2
BP	GO:1902895	positive regulation of miRNA transcription	2/43	45/18800	0.00475301	0.026196	0.0147422	JUN/TP53	2
BP	GO:0032943	mononuclear cell proliferation	4/43	300/18800	0.00480799	0.0264317	0.0148748	ATM/CDKN1A/TLR4/TP53	4
BP	GO:0010675	regulation of cellular carbohydrate metabolic process	3/43	150/18800	0.0048642	0.0265387	0.014935	DDIT4/SIRT1/TP53	3
BP	GO:0043535	regulation of blood vessel endothelial cell migration	3/43	150/18800	0.0048642	0.0265387	0.014935	HMOX1/PTGS2/SIRT1	3
BP	GO:0098754	detoxification	3/43	150/18800	0.0048642	0.0265387	0.014935	MT1G/PRDX1/PTGS2	3
BP	GO:0001974	blood vessel remodeling	2/43	46/18800	0.00496187	0.0270036	0.0151966	ATG5/EPAS1	2
BP	GO:0001774	microglial cell activation	2/43	47/18800	0.00517491	0.0278135	0.0156525	ATM/JUN	2
BP	GO:0010824	regulation of centrosome duplication	2/43	47/18800	0.00517491	0.0278135	0.0156525	CHMP5/SIRT1	2
BP	GO:0031294	lymphocyte costimulation	2/43	47/18800	0.00517491	0.0278135	0.0156525	DPP4/PIK3CA	2
BP	GO:2000144	positive regulation of DNA-templated transcription, initiation	2/43	47/18800	0.00517491	0.0278135	0.0156525	JUN/TP53	2
BP	GO:2000378	negative regulation of reactive oxygen species metabolic process	2/43	47/18800	0.00517491	0.0278135	0.0156525	ATG5/TP53	2
BP	GO:0044089	positive regulation of cellular component biogenesis	5/43	494/18800	0.00519015	0.0278264	0.0156597	ALOX15/ATM/PIK3CA/TLR4/TP53	5
BP	GO:0006913	nucleocytoplasmic transport	4/43	308/18800	0.0052746	0.0281399	0.0158361	CDKN1A/PTGS2/TP53/TXNIP	4
BP	GO:0051169	nuclear transport	4/43	308/18800	0.0052746	0.0281399	0.0158361	CDKN1A/PTGS2/TP53/TXNIP	4
BP	GO:0044839	cell cycle G2/M phase transition	3/43	155/18800	0.00532822	0.0283561	0.0159578	ATM/CDKN1A/TP53	3
BP	GO:0010543	regulation of platelet activation	2/43	48/18800	0.00539211	0.0284861	0.016031	ALOX12/TLR4	2
BP	GO:0044818	mitotic G2/M transition checkpoint	2/43	48/18800	0.00539211	0.0284861	0.016031	ATM/CDKN1A	2
BP	GO:0048146	positive regulation of fibroblast proliferation	2/43	48/18800	0.00539211	0.0284861	0.016031	CDKN1A/JUN	2
BP	GO:0031960	response to corticosteroid	3/43	157/18800	0.00552105	0.0290257	0.0163346	DDIT4/PIK3CA/PTGS2	3
BP	GO:0120254	olefinic compound metabolic process	3/43	157/18800	0.00552105	0.0290257	0.0163346	ALOX12/ALOX15/PTGS2	3
BP	GO:0010656	negative regulation of muscle cell apoptotic process	2/43	49/18800	0.00561344	0.0290473	0.0163468	ALOX12/HMOX1	2
BP	GO:0030225	macrophage differentiation	2/43	49/18800	0.00561344	0.0290473	0.0163468	RB1/SIRT1	2
BP	GO:0042304	regulation of fatty acid biosynthetic process	2/43	49/18800	0.00561344	0.0290473	0.0163468	PTGS2/SIRT1	2
BP	GO:0050873	brown fat cell differentiation	2/43	49/18800	0.00561344	0.0290473	0.0163468	PTGS2/SIRT1	2
BP	GO:2000772	regulation of cellular senescence	2/43	49/18800	0.00561344	0.0290473	0.0163468	SIRT1/TP53	2
BP	GO:0007292	female gamete generation	3/43	158/18800	0.00561902	0.0290473	0.0163468	ATM/PTGS2/SIRT1	3
BP	GO:0008064	regulation of actin polymerization or depolymerization	3/43	158/18800	0.00561902	0.0290473	0.0163468	ALOX15/CAPG/PIK3CA	3
BP	GO:0030832	regulation of actin filament length	3/43	159/18800	0.00571804	0.0294117	0.0165519	ALOX15/CAPG/PIK3CA	3
BP	GO:0019058	viral life cycle	4/43	317/18800	0.00583491	0.0294117	0.0165519	ATG5/CHMP5/EIF2AK4/SLC1A5	4
BP	GO:0002269	leukocyte activation involved in inflammatory response	2/43	50/18800	0.00583889	0.0294117	0.0165519	ATM/JUN	2
BP	GO:0006692	prostanoid metabolic process	2/43	50/18800	0.00583889	0.0294117	0.0165519	PTGS2/SIRT1	2
BP	GO:0006693	prostaglandin metabolic process	2/43	50/18800	0.00583889	0.0294117	0.0165519	PTGS2/SIRT1	2
BP	GO:0031057	negative regulation of histone modification	2/43	50/18800	0.00583889	0.0294117	0.0165519	ATG5/SIRT1	2
BP	GO:0031062	positive regulation of histone methylation	2/43	50/18800	0.00583889	0.0294117	0.0165519	MYB/SIRT1	2
BP	GO:0042149	cellular response to glucose starvation	2/43	50/18800	0.00583889	0.0294117	0.0165519	SIRT1/TP53	2
BP	GO:0043457	regulation of cellular respiration	2/43	50/18800	0.00583889	0.0294117	0.0165519	CISD1/PIK3CA	2
BP	GO:0061647	histone H3-K9 modification	2/43	50/18800	0.00583889	0.0294117	0.0165519	MYB/SIRT1	2
BP	GO:1903053	regulation of extracellular matrix organization	2/43	50/18800	0.00583889	0.0294117	0.0165519	DPP4/RB1	2
BP	GO:0007140	male meiotic nuclear division	2/43	51/18800	0.00606843	0.0303562	0.0170834	ATM/SLC2A8	2
BP	GO:0015804	neutral amino acid transport	2/43	51/18800	0.00606843	0.0303562	0.0170834	SLC1A5/SLC7A5	2
BP	GO:0045912	negative regulation of carbohydrate metabolic process	2/43	51/18800	0.00606843	0.0303562	0.0170834	DDIT4/TP53	2
BP	GO:1901990	regulation of mitotic cell cycle phase transition	4/43	321/18800	0.00609625	0.030425	0.0171221	ATM/CDKN1A/RB1/TP53	4
BP	GO:0009895	negative regulation of catabolic process	4/43	324/18800	0.00629731	0.031094	0.0174986	DDIT4/HMOX1/PIK3CA/TP53	4
BP	GO:0002686	negative regulation of leukocyte migration	2/43	52/18800	0.00630206	0.031094	0.0174986	DPP4/HMOX1	2
BP	GO:0046605	regulation of centrosome cycle	2/43	52/18800	0.00630206	0.031094	0.0174986	CHMP5/SIRT1	2
BP	GO:1904036	negative regulation of epithelial cell apoptotic process	2/43	52/18800	0.00630206	0.031094	0.0174986	HMOX1/RB1	2
BP	GO:2000677	regulation of transcription regulatory region DNA binding	2/43	52/18800	0.00630206	0.031094	0.0174986	DDIT3/RB1	2
BP	GO:0043090	amino acid import	2/43	53/18800	0.00653974	0.0321934	0.0181173	SLC1A5/SLC7A5	2
BP	GO:0070661	leukocyte proliferation	4/43	330/18800	0.00671263	0.0329695	0.0185541	ATM/CDKN1A/TLR4/TP53	4
BP	GO:0030834	regulation of actin filament depolymerization	2/43	54/18800	0.00678147	0.0331573	0.0186597	CAPG/PIK3CA	2
BP	GO:0061900	glial cell activation	2/43	54/18800	0.00678147	0.0331573	0.0186597	ATM/JUN	2
BP	GO:0000070	mitotic sister chromatid segregation	3/43	171/18800	0.00698864	0.0340932	0.0191865	ATM/CHMP5/RB1	3
BP	GO:0042113	B cell activation	4/43	336/18800	0.00714581	0.0347816	0.0195739	ATM/CDKN1A/TLR4/TP53	4
BP	GO:0048771	tissue remodeling	3/43	174/18800	0.00733041	0.0356001	0.0200345	ATG5/EPAS1/TP53	3
BP	GO:0043534	blood vessel endothelial cell migration	3/43	175/18800	0.0074465	0.036083	0.0203062	HMOX1/PTGS2/SIRT1	3
BP	GO:0046456	icosanoid biosynthetic process	2/43	57/18800	0.00753071	0.0362478	0.020399	PTGS2/SIRT1	2
BP	GO:0051898	negative regulation of protein kinase B signaling	2/43	57/18800	0.00753071	0.0362478	0.020399	DDIT3/SIRT1	2
BP	GO:2000142	regulation of DNA-templated transcription, initiation	2/43	57/18800	0.00753071	0.0362478	0.020399	JUN/TP53	2
BP	GO:0006289	nucleotide-excision repair	2/43	58/18800	0.00778841	0.0372196	0.0209458	SIRT1/TP53	2
BP	GO:0006584	catecholamine metabolic process	2/43	58/18800	0.00778841	0.0372196	0.0209458	DRD4/EPAS1	2
BP	GO:0009712	catechol-containing compound metabolic process	2/43	58/18800	0.00778841	0.0372196	0.0209458	DRD4/EPAS1	2
BP	GO:0001936	regulation of endothelial cell proliferation	3/43	178/18800	0.00780133	0.0372196	0.0209458	HMOX1/JUN/SIRT1	3
BP	GO:0007265	Ras protein signal transduction	4/43	347/18800	0.00798743	0.0380237	0.0213984	CDKN1A/JUN/RB1/TP53	4
BP	GO:0030042	actin filament depolymerization	2/43	59/18800	0.00805006	0.0380708	0.0214249	CAPG/PIK3CA	2
BP	GO:0035065	regulation of histone acetylation	2/43	59/18800	0.00805006	0.0380708	0.0214249	ATG5/SIRT1	2
BP	GO:1902893	regulation of miRNA transcription	2/43	59/18800	0.00805006	0.0380708	0.0214249	JUN/TP53	2
BP	GO:0032535	regulation of cellular component size	4/43	351/18800	0.00830901	0.0390709	0.0219877	ALOX15/CAPG/PIK3CA/ULK2	4
BP	GO:0030071	regulation of mitotic metaphase/anaphase transition	2/43	60/18800	0.00831564	0.0390709	0.0219877	ATM/RB1	2
BP	GO:0061614	miRNA transcription	2/43	60/18800	0.00831564	0.0390709	0.0219877	JUN/TP53	2
BP	GO:0045428	regulation of nitric oxide biosynthetic process	2/43	61/18800	0.00858513	0.0402498	0.0226511	PTGS2/TLR4	2
BP	GO:0010639	negative regulation of organelle organization	4/43	356/18800	0.00872285	0.0408071	0.0229648	ATM/CAPG/PIK3CA/TP53	4
BP	GO:0007091	metaphase/anaphase transition of mitotic cell cycle	2/43	62/18800	0.00885851	0.0410868	0.0231222	ATM/RB1	2
BP	GO:0010972	negative regulation of G2/M transition of mitotic cell cycle	2/43	62/18800	0.00885851	0.0410868	0.0231222	ATM/CDKN1A	2
BP	GO:0032757	positive regulation of interleukin-8 production	2/43	62/18800	0.00885851	0.0410868	0.0231222	DDIT3/TLR4	2
BP	GO:0043030	regulation of macrophage activation	2/43	62/18800	0.00885851	0.0410868	0.0231222	ATM/TLR4	2
BP	GO:0051896	regulation of protein kinase B signaling	3/43	187/18800	0.00892531	0.0413081	0.0232467	DDIT3/PIK3CA/SIRT1	3
BP	GO:0002819	regulation of adaptive immune response	3/43	188/18800	0.00905575	0.0417335	0.0234861	ALOX15/EIF2AK4/SIRT1	3
BP	GO:0031099	regeneration	3/43	188/18800	0.00905575	0.0417335	0.0234861	CDKN1A/HMOX1/JUN	3
BP	GO:1902099	regulation of metaphase/anaphase transition of cell cycle	2/43	63/18800	0.00913577	0.0420129	0.0236434	ATM/RB1	2
BP	GO:0009620	response to fungus	2/43	64/18800	0.00941688	0.0430316	0.0242166	ATG5/TLR4	2
BP	GO:0080164	regulation of nitric oxide metabolic process	2/43	64/18800	0.00941688	0.0430316	0.0242166	PTGS2/TLR4	2
BP	GO:1902750	negative regulation of cell cycle G2/M phase transition	2/43	64/18800	0.00941688	0.0430316	0.0242166	ATM/CDKN1A	2
BP	GO:0007626	locomotory behavior	3/43	192/18800	0.00958874	0.0437246	0.0246067	ARRDC3/DPP4/DRD4	3
BP	GO:0001756	somitogenesis	2/43	65/18800	0.00970183	0.0438709	0.024689	ATM/TP53	2
BP	GO:0010965	regulation of mitotic sister chromatid separation	2/43	65/18800	0.00970183	0.0438709	0.024689	ATM/RB1	2
BP	GO:0044784	metaphase/anaphase transition of cell cycle	2/43	65/18800	0.00970183	0.0438709	0.024689	ATM/RB1	2
BP	GO:1902017	regulation of cilium assembly	2/43	65/18800	0.00970183	0.0438709	0.024689	ATG3/ATG5	2
BP	GO:0009746	response to hexose	3/43	193/18800	0.0097248	0.0438831	0.0246959	PIK3CA/PTGS2/TXNIP	3
BP	GO:0001935	endothelial cell proliferation	3/43	194/18800	0.00986199	0.0444097	0.0249922	HMOX1/JUN/SIRT1	3
BP	GO:0120032	regulation of plasma membrane bounded cell projection assembly	3/43	195/18800	0.0100003	0.0449391	0.0252901	ATG3/ATG5/PIK3CA	3
BP	GO:0060491	regulation of cell projection assembly	3/43	197/18800	0.0102803	0.0458299	0.0257914	ATG3/ATG5/PIK3CA	3
BP	GO:0051851	modulation by host of symbiont process	2/43	67/18800	0.0102832	0.0458299	0.0257914	EIF2AK4/JUN	2
BP	GO:0051926	negative regulation of calcium ion transport	2/43	67/18800	0.0102832	0.0458299	0.0257914	DRD4/PTGS2	2
BP	GO:1902475	L-alpha-amino acid transmembrane transport	2/43	67/18800	0.0102832	0.0458299	0.0257914	SLC1A5/SLC7A5	2
BP	GO:1902903	regulation of supramolecular fiber organization	4/43	376/18800	0.0105133	0.0465757	0.0262111	ALOX15/CAPG/PIK3CA/RB1	4
BP	GO:0008154	actin polymerization or depolymerization	3/43	199/18800	0.0105649	0.0465757	0.0262111	ALOX15/CAPG/PIK3CA	3
BP	GO:0043627	response to estrogen	2/43	68/18800	0.0105795	0.0465757	0.0262111	HMOX1/NCOA4	2
BP	GO:0046854	phosphatidylinositol phosphate biosynthetic process	2/43	68/18800	0.0105795	0.0465757	0.0262111	ATM/PIK3CA	2
BP	GO:0051306	mitotic sister chromatid separation	2/43	68/18800	0.0105795	0.0465757	0.0262111	ATM/RB1	2
BP	GO:2000756	regulation of peptidyl-lysine acetylation	2/43	68/18800	0.0105795	0.0465757	0.0262111	ATG5/SIRT1	2
BP	GO:0007179	transforming growth factor beta receptor signaling pathway	3/43	200/18800	0.0107089	0.0468597	0.026371	JUN/SIRT1/TP53	3
BP	GO:0034284	response to monosaccharide	3/43	200/18800	0.0107089	0.0468597	0.026371	PIK3CA/PTGS2/TXNIP	3
BP	GO:0050864	regulation of B cell activation	3/43	200/18800	0.0107089	0.0468597	0.026371	ATM/CDKN1A/TLR4	3
BP	GO:0006006	glucose metabolic process	3/43	201/18800	0.0108541	0.0473198	0.0266299	PIK3CA/SIRT1/TP53	3
BP	GO:0015807	L-amino acid transport	2/43	69/18800	0.0108796	0.0473198	0.0266299	SLC1A5/SLC7A5	2
BP	GO:0050795	regulation of behavior	2/43	69/18800	0.0108796	0.0473198	0.0266299	ARRDC3/EIF2AK4	2
BP	GO:1902115	regulation of organelle assembly	3/43	202/18800	0.0110004	0.0477491	0.0268715	ATG3/ATG5/CHMP5	3
BP	GO:0030098	lymphocyte differentiation	4/43	382/18800	0.0110936	0.0478661	0.0269373	ATG5/ATM/MYB/TP53	4
BP	GO:0050678	regulation of epithelial cell proliferation	4/43	382/18800	0.0110936	0.0478661	0.0269373	HMOX1/JUN/RB1/SIRT1	4
BP	GO:0050878	regulation of body fluid levels	4/43	382/18800	0.0110936	0.0478661	0.0269373	ALOX12/ATG5/PIK3CA/TLR4	4
BP	GO:0071383	cellular response to steroid hormone stimulus	3/43	203/18800	0.0111478	0.0479672	0.0269942	DDIT4/NCOA4/SIRT1	3
BP	GO:0032722	positive regulation of chemokine production	2/43	70/18800	0.0111835	0.0479672	0.0269942	HMOX1/TLR4	2
BP	GO:0071260	cellular response to mechanical stimulus	2/43	70/18800	0.0111835	0.0479672	0.0269942	PTGS2/TLR4	2
BP	GO:0000819	sister chromatid segregation	3/43	205/18800	0.0114461	0.0488999	0.0275191	ATM/CHMP5/RB1	3
BP	GO:0007623	circadian rhythm	3/43	205/18800	0.0114461	0.0488999	0.0275191	DRD4/SIRT1/TP53	3
BP	GO:0033045	regulation of sister chromatid segregation	2/43	72/18800	0.0118024	0.0501254	0.0282088	ATM/RB1	2
BP	GO:1901880	negative regulation of protein depolymerization	2/43	72/18800	0.0118024	0.0501254	0.0282088	CAPG/PIK3CA	2
BP	GO:1905818	regulation of chromosome separation	2/43	72/18800	0.0118024	0.0501254	0.0282088	ATM/RB1	2
BP	GO:0071902	positive regulation of protein serine/threonine kinase activity	3/43	208/18800	0.0119022	0.0504504	0.0283917	DRD4/SIRT1/TLR4	3
BP	GO:0016239	positive regulation of macroautophagy	2/43	73/18800	0.0121174	0.0508648	0.0286249	HMOX1/SIRT1	2
BP	GO:0033555	multicellular organismal response to stress	2/43	73/18800	0.0121174	0.0508648	0.0286249	DPP4/DRD4	2
BP	GO:0043462	regulation of ATP-dependent activity	2/43	73/18800	0.0121174	0.0508648	0.0286249	SIRT1/TP53	2
BP	GO:0043967	histone H4 acetylation	2/43	73/18800	0.0121174	0.0508648	0.0286249	ATG5/SIRT1	2
BP	GO:0048662	negative regulation of smooth muscle cell proliferation	2/43	73/18800	0.0121174	0.0508648	0.0286249	CDKN1A/HMOX1	2
BP	GO:0050679	positive regulation of epithelial cell proliferation	3/43	211/18800	0.0123687	0.0518009	0.0291517	HMOX1/JUN/SIRT1	3
BP	GO:0035924	cellular response to vascular endothelial growth factor stimulus	2/43	74/18800	0.012436	0.0518009	0.0291517	MT1G/PIK3CA	2
BP	GO:0050688	regulation of defense response to virus	2/43	74/18800	0.012436	0.0518009	0.0291517	ATG5/EIF2AK4	2
BP	GO:0051298	centrosome duplication	2/43	74/18800	0.012436	0.0518009	0.0291517	CHMP5/SIRT1	2
BP	GO:0046486	glycerolipid metabolic process	4/43	396/18800	0.0125276	0.0520821	0.02931	ALOX15/ATM/PIK3CA/SIRT1	4
BP	GO:0006469	negative regulation of protein kinase activity	3/43	213/18800	0.0126855	0.0526374	0.0296224	CDKN1A/RB1/SIRT1	3
BP	GO:0006809	nitric oxide biosynthetic process	2/43	75/18800	0.0127584	0.0528387	0.0297357	PTGS2/TLR4	2
BP	GO:0009952	anterior/posterior pattern specification	3/43	214/18800	0.0128456	0.0529972	0.0298249	ATM/DDIT3/TP53	3
BP	GO:0046474	glycerophospholipid biosynthetic process	3/43	214/18800	0.0128456	0.0529972	0.0298249	ALOX15/ATM/PIK3CA	3
BP	GO:0043491	protein kinase B signaling	3/43	216/18800	0.0131693	0.0541267	0.0304606	DDIT3/PIK3CA/SIRT1	3
BP	GO:0050866	negative regulation of cell activation	3/43	216/18800	0.0131693	0.0541267	0.0304606	ALOX12/ATM/HMOX1	3
BP	GO:0032729	positive regulation of interferon-gamma production	2/43	77/18800	0.0134139	0.0549236	0.0309091	SLC7A5/TLR4	2
BP	GO:1903201	regulation of oxidative stress-induced cell death	2/43	77/18800	0.0134139	0.0549236	0.0309091	SIRT1/TLR4	2
BP	GO:0033077	T cell differentiation in thymus	2/43	78/18800	0.0137471	0.0560759	0.0315575	ATG5/TP53	2
BP	GO:0090049	regulation of cell migration involved in sprouting angiogenesis	2/43	78/18800	0.0137471	0.0560759	0.0315575	HMOX1/PTGS2	2
BP	GO:0070374	positive regulation of ERK1 and ERK2 cascade	3/43	220/18800	0.0138308	0.0563112	0.03169	ALOX15/JUN/TLR4	3
BP	GO:0007596	blood coagulation	3/43	221/18800	0.0139991	0.0568895	0.0320154	ALOX12/PIK3CA/TLR4	3
BP	GO:0006970	response to osmotic stress	2/43	79/18800	0.0140839	0.0570202	0.0320889	PTGS2/TP53	2
BP	GO:0031060	regulation of histone methylation	2/43	79/18800	0.0140839	0.0570202	0.0320889	MYB/SIRT1	2
BP	GO:0050870	positive regulation of T cell activation	3/43	223/18800	0.0143392	0.0579455	0.0326097	DPP4/MYB/PIK3CA	3
BP	GO:0006096	glycolytic process	2/43	81/18800	0.0147682	0.0592369	0.0333364	DDIT4/SLC2A6	2
BP	GO:0030512	negative regulation of transforming growth factor beta receptor signaling pathway	2/43	81/18800	0.0147682	0.0592369	0.0333364	SIRT1/TP53	2
BP	GO:0046209	nitric oxide metabolic process	2/43	81/18800	0.0147682	0.0592369	0.0333364	PTGS2/TLR4	2
BP	GO:0051303	establishment of chromosome localization	2/43	81/18800	0.0147682	0.0592369	0.0333364	ATM/CHMP5	2
BP	GO:0008406	gonad development	3/43	226/18800	0.0148582	0.0592686	0.0333543	ATM/NCOA4/SIRT1	3
BP	GO:0009743	response to carbohydrate	3/43	226/18800	0.0148582	0.0592686	0.0333543	PIK3CA/PTGS2/TXNIP	3
BP	GO:0050817	coagulation	3/43	226/18800	0.0148582	0.0592686	0.0333543	ALOX12/PIK3CA/TLR4	3
BP	GO:0007599	hemostasis	3/43	227/18800	0.0150335	0.0596366	0.0335613	ALOX12/PIK3CA/TLR4	3
BP	GO:0006757	ATP generation from ADP	2/43	82/18800	0.0151156	0.0596366	0.0335613	DDIT4/SLC2A6	2
BP	GO:0043242	negative regulation of protein-containing complex disassembly	2/43	82/18800	0.0151156	0.0596366	0.0335613	CAPG/PIK3CA	2
BP	GO:1901983	regulation of protein acetylation	2/43	82/18800	0.0151156	0.0596366	0.0335613	ATG5/SIRT1	2
BP	GO:1905897	regulation of response to endoplasmic reticulum stress	2/43	82/18800	0.0151156	0.0596366	0.0335613	DDIT3/SIRT1	2
BP	GO:2001057	reactive nitrogen species metabolic process	2/43	82/18800	0.0151156	0.0596366	0.0335613	PTGS2/TLR4	2
BP	GO:0050000	chromosome localization	2/43	83/18800	0.0154666	0.0609103	0.0342782	ATM/CHMP5	2
BP	GO:0010594	regulation of endothelial cell migration	3/43	230/18800	0.0155666	0.0610821	0.0343748	HMOX1/PTGS2/SIRT1	3
BP	GO:0050670	regulation of lymphocyte proliferation	3/43	230/18800	0.0155666	0.0610821	0.0343748	ATM/CDKN1A/TLR4	3
BP	GO:0006816	calcium ion transport	4/43	424/18800	0.0157418	0.0615656	0.0346469	ATG5/DDIT3/DRD4/PTGS2	4
BP	GO:0045137	development of primary sexual characteristics	3/43	231/18800	0.0157467	0.0615656	0.0346469	ATM/NCOA4/SIRT1	3
BP	GO:0061053	somite development	2/43	84/18800	0.0158211	0.0616339	0.0346854	ATM/TP53	2
BP	GO:0071277	cellular response to calcium ion	2/43	84/18800	0.0158211	0.0616339	0.0346854	ALOX15/JUN	2
BP	GO:0032944	regulation of mononuclear cell proliferation	3/43	233/18800	0.0161103	0.0626481	0.0352561	ATM/CDKN1A/TLR4	3
BP	GO:2000106	regulation of leukocyte apoptotic process	2/43	85/18800	0.016179	0.0628025	0.035343	SIRT1/TP53	2
BP	GO:0032102	negative regulation of response to external stimulus	4/43	429/18800	0.0163657	0.0634136	0.0356869	ALOX12/ATG5/DPP4/RB1	4
BP	GO:0046364	monosaccharide biosynthetic process	2/43	86/18800	0.0165405	0.0638621	0.0359393	PGD/SIRT1	2
BP	GO:1900542	regulation of purine nucleotide metabolic process	2/43	86/18800	0.0165405	0.0638621	0.0359393	DDIT4/SLC2A6	2
BP	GO:0048732	gland development	4/43	431/18800	0.0166196	0.0640536	0.0360471	ATM/HMOX1/JUN/PIK3CA	4
BP	GO:0033673	negative regulation of kinase activity	3/43	236/18800	0.0166647	0.0641132	0.0360806	CDKN1A/RB1/SIRT1	3
BP	GO:0010232	vascular transport	2/43	87/18800	0.0169053	0.0648087	0.036472	SLC1A5/SLC7A5	2
BP	GO:0150104	transport across blood-brain barrier	2/43	87/18800	0.0169053	0.0648087	0.036472	SLC1A5/SLC7A5	2
BP	GO:0098657	import into cell	3/43	238/18800	0.0170402	0.0652104	0.0366981	DRD4/SLC1A5/SLC7A5	3
BP	GO:0006140	regulation of nucleotide metabolic process	2/43	88/18800	0.0172736	0.0658709	0.0370698	DDIT4/SLC2A6	2
BP	GO:1901879	regulation of protein depolymerization	2/43	88/18800	0.0172736	0.0658709	0.0370698	CAPG/PIK3CA	2
BP	GO:0044772	mitotic cell cycle phase transition	4/43	440/18800	0.0177929	0.0676607	0.038077	ATM/CDKN1A/RB1/TP53	4
BP	GO:0019318	hexose metabolic process	3/43	242/18800	0.0178054	0.0676607	0.038077	PIK3CA/SIRT1/TP53	3
BP	GO:1901617	organic hydroxy compound biosynthetic process	3/43	243/18800	0.0179997	0.0681193	0.0383351	ALOX12/ALOX15/SIRT1	3
BP	GO:0046031	ADP metabolic process	2/43	90/18800	0.0180205	0.0681193	0.0383351	DDIT4/SLC2A6	2
BP	GO:0070301	cellular response to hydrogen peroxide	2/43	90/18800	0.0180205	0.0681193	0.0383351	MAP1LC3A/SIRT1	2
BP	GO:0050673	epithelial cell proliferation	4/43	443/18800	0.0181953	0.0686603	0.0386395	HMOX1/JUN/RB1/SIRT1	4
BP	GO:1903039	positive regulation of leukocyte cell-cell adhesion	3/43	245/18800	0.0183919	0.0691878	0.0389364	DPP4/MYB/PIK3CA	3
BP	GO:0051983	regulation of chromosome segregation	2/43	91/18800	0.018399	0.0691878	0.0389364	ATM/RB1	2
BP	GO:0071695	anatomical structure maturation	3/43	246/18800	0.0185897	0.0694738	0.0390974	DDIT3/EPAS1/RB1	3
BP	GO:1903320	regulation of protein modification by small protein conjugation or removal	3/43	246/18800	0.0185897	0.0694738	0.0390974	ARRDC3/ATG5/EPAS1	3
BP	GO:2001020	regulation of response to DNA damage stimulus	3/43	246/18800	0.0185897	0.0694738	0.0390974	ATM/SIRT1/TP53	3
BP	GO:0000280	nuclear division	4/43	446/18800	0.0186033	0.0694738	0.0390974	ATM/CHMP5/RB1/SLC2A8	4
BP	GO:0019217	regulation of fatty acid metabolic process	2/43	92/18800	0.0187809	0.0696857	0.0392166	PTGS2/SIRT1	2
BP	GO:1900407	regulation of cellular response to oxidative stress	2/43	92/18800	0.0187809	0.0696857	0.0392166	SIRT1/TLR4	2
BP	GO:0009636	response to toxic substance	3/43	247/18800	0.0187888	0.0696857	0.0392166	MT1G/PRDX1/PTGS2	3
BP	GO:0060047	heart contraction	3/43	247/18800	0.0187888	0.0696857	0.0392166	ATG5/EPAS1/PIK3CA	3
BP	GO:0031331	positive regulation of cellular catabolic process	4/43	449/18800	0.0190171	0.0704119	0.0396253	ATM/HMOX1/SIRT1/ULK2	4
BP	GO:0034612	response to tumor necrosis factor	3/43	249/18800	0.0191904	0.0709326	0.0399183	PTGS2/SIRT1/TP53	3
BP	GO:0002042	cell migration involved in sprouting angiogenesis	2/43	94/18800	0.0195546	0.0720329	0.0405375	HMOX1/PTGS2	2
BP	GO:1904035	regulation of epithelial cell apoptotic process	2/43	94/18800	0.0195546	0.0720329	0.0405375	HMOX1/RB1	2
BP	GO:0051924	regulation of calcium ion transport	3/43	251/18800	0.0195969	0.072066	0.0405561	ATG5/DRD4/PTGS2	3
BP	GO:0050708	regulation of protein secretion	3/43	252/18800	0.0198019	0.0725734	0.0408417	ACSL4/DRD4/TLR4	3
BP	GO:0071560	cellular response to transforming growth factor beta stimulus	3/43	252/18800	0.0198019	0.0725734	0.0408417	JUN/SIRT1/TP53	3
BP	GO:0032088	negative regulation of NF-kappaB transcription factor activity	2/43	95/18800	0.0199465	0.0729588	0.0410586	DDIT3/SIRT1	2
BP	GO:0022407	regulation of cell-cell adhesion	4/43	456/18800	0.0200047	0.0729588	0.0410586	ALOX12/DPP4/MYB/PIK3CA	4
BP	GO:0045017	glycerolipid biosynthetic process	3/43	253/18800	0.0200081	0.0729588	0.0410586	ALOX15/ATM/PIK3CA	3
BP	GO:0043122	regulation of I-kappaB kinase/NF-kappaB signaling	3/43	254/18800	0.0202155	0.0734678	0.041345	HMOX1/SIRT1/TLR4	3
BP	GO:0070663	regulation of leukocyte proliferation	3/43	254/18800	0.0202155	0.0734678	0.041345	ATM/CDKN1A/TLR4	3
BP	GO:0010389	regulation of G2/M transition of mitotic cell cycle	2/43	97/18800	0.0207401	0.0748719	0.0421352	ATM/CDKN1A	2
BP	GO:0032642	regulation of chemokine production	2/43	97/18800	0.0207401	0.0748719	0.0421352	HMOX1/TLR4	2
BP	GO:0043279	response to alkaloid	2/43	97/18800	0.0207401	0.0748719	0.0421352	DRD4/MAP1LC3A	2
BP	GO:0051304	chromosome separation	2/43	97/18800	0.0207401	0.0748719	0.0421352	ATM/RB1	2
BP	GO:0003015	heart process	3/43	257/18800	0.0208449	0.0751248	0.0422776	ATG5/EPAS1/PIK3CA	3
BP	GO:0008654	phospholipid biosynthetic process	3/43	258/18800	0.0210571	0.0755665	0.0425261	ALOX15/ATM/PIK3CA	3
BP	GO:0071559	response to transforming growth factor beta	3/43	258/18800	0.0210571	0.0755665	0.0425261	JUN/SIRT1/TP53	3
BP	GO:0032602	chemokine production	2/43	98/18800	0.0211419	0.0755665	0.0425261	HMOX1/TLR4	2
BP	GO:0036473	cell death in response to oxidative stress	2/43	98/18800	0.0211419	0.0755665	0.0425261	SIRT1/TLR4	2
BP	GO:0120162	positive regulation of cold-induced thermogenesis	2/43	98/18800	0.0211419	0.0755665	0.0425261	EPAS1/SCD	2
BP	GO:0006165	nucleoside diphosphate phosphorylation	2/43	99/18800	0.0215469	0.0768751	0.0432625	DDIT4/SLC2A6	2
BP	GO:0003333	amino acid transmembrane transport	2/43	100/18800	0.0219551	0.0768751	0.0432625	SLC1A5/SLC7A5	2
BP	GO:0046939	nucleotide phosphorylation	2/43	100/18800	0.0219551	0.0768751	0.0432625	DDIT4/SLC2A6	2
BP	GO:0098869	cellular oxidant detoxification	2/43	100/18800	0.0219551	0.0768751	0.0432625	PRDX1/PTGS2	2
BP	GO:0030217	T cell differentiation	3/43	263/18800	0.0221359	0.0768751	0.0432625	ATG5/MYB/TP53	3
BP	GO:0051702	biological process involved in interaction with symbiont	2/43	101/18800	0.0223665	0.0768751	0.0432625	EIF2AK4/JUN	2
BP	GO:1902882	regulation of response to oxidative stress	2/43	101/18800	0.0223665	0.0768751	0.0432625	SIRT1/TLR4	2
BP	GO:0031330	negative regulation of cellular catabolic process	3/43	265/18800	0.0225759	0.0768751	0.0432625	HMOX1/PIK3CA/TP53	3
BP	GO:0000098	sulfur amino acid catabolic process	1/43	10/18800	0.0226437	0.0768751	0.0432625	CBS	1
BP	GO:0001542	ovulation from ovarian follicle	1/43	10/18800	0.0226437	0.0768751	0.0432625	SIRT1	1
BP	GO:0006646	phosphatidylethanolamine biosynthetic process	1/43	10/18800	0.0226437	0.0768751	0.0432625	ALOX15	1
BP	GO:0010998	regulation of translational initiation by eIF2 alpha phosphorylation	1/43	10/18800	0.0226437	0.0768751	0.0432625	EIF2AK4	1
BP	GO:0032070	regulation of deoxyribonuclease activity	1/43	10/18800	0.0226437	0.0768751	0.0432625	SIRT1	1
BP	GO:0033007	negative regulation of mast cell activation involved in immune response	1/43	10/18800	0.0226437	0.0768751	0.0432625	HMOX1	1
BP	GO:0034085	establishment of sister chromatid cohesion	1/43	10/18800	0.0226437	0.0768751	0.0432625	RB1	1
BP	GO:0034397	telomere localization	1/43	10/18800	0.0226437	0.0768751	0.0432625	ATM	1
BP	GO:0034776	response to histamine	1/43	10/18800	0.0226437	0.0768751	0.0432625	DRD4	1
BP	GO:0043653	mitochondrial fragmentation involved in apoptotic process	1/43	10/18800	0.0226437	0.0768751	0.0432625	ATG3	1
BP	GO:0048263	determination of dorsal identity	1/43	10/18800	0.0226437	0.0768751	0.0432625	DDIT3	1
BP	GO:0051974	negative regulation of telomerase activity	1/43	10/18800	0.0226437	0.0768751	0.0432625	TP53	1
BP	GO:0055015	ventricular cardiac muscle cell development	1/43	10/18800	0.0226437	0.0768751	0.0432625	ATG5	1
BP	GO:0070327	thyroid hormone transport	1/43	10/18800	0.0226437	0.0768751	0.0432625	SLC7A5	1
BP	GO:0070391	response to lipoteichoic acid	1/43	10/18800	0.0226437	0.0768751	0.0432625	TLR4	1
BP	GO:0071223	cellular response to lipoteichoic acid	1/43	10/18800	0.0226437	0.0768751	0.0432625	TLR4	1
BP	GO:0090220	chromosome localization to nuclear envelope involved in homologous chromosome segregation	1/43	10/18800	0.0226437	0.0768751	0.0432625	ATM	1
BP	GO:0099149	regulation of postsynaptic neurotransmitter receptor internalization	1/43	10/18800	0.0226437	0.0768751	0.0432625	DRD4	1
BP	GO:1904464	regulation of matrix metallopeptidase secretion	1/43	10/18800	0.0226437	0.0768751	0.0432625	TLR4	1
BP	GO:1904896	ESCRT complex disassembly	1/43	10/18800	0.0226437	0.0768751	0.0432625	CHMP5	1
BP	GO:1904903	ESCRT III complex disassembly	1/43	10/18800	0.0226437	0.0768751	0.0432625	CHMP5	1
BP	GO:1990773	matrix metallopeptidase secretion	1/43	10/18800	0.0226437	0.0768751	0.0432625	TLR4	1
BP	GO:2000109	regulation of macrophage apoptotic process	1/43	10/18800	0.0226437	0.0768751	0.0432625	SIRT1	1
BP	GO:2000434	regulation of protein neddylation	1/43	10/18800	0.0226437	0.0768751	0.0432625	EPAS1	1
BP	GO:0032677	regulation of interleukin-8 production	2/43	102/18800	0.0227811	0.0770999	0.0433891	DDIT3/TLR4	2
BP	GO:2001243	negative regulation of intrinsic apoptotic signaling pathway	2/43	102/18800	0.0227811	0.0770999	0.0433891	PTGS2/SIRT1	2
BP	GO:0009135	purine nucleoside diphosphate metabolic process	2/43	103/18800	0.023199	0.0780263	0.0439104	DDIT4/SLC2A6	2
BP	GO:0009179	purine ribonucleoside diphosphate metabolic process	2/43	103/18800	0.023199	0.0780263	0.0439104	DDIT4/SLC2A6	2
BP	GO:0032637	interleukin-8 production	2/43	103/18800	0.023199	0.0780263	0.0439104	DDIT3/TLR4	2
BP	GO:0035282	segmentation	2/43	103/18800	0.023199	0.0780263	0.0439104	ATM/TP53	2
BP	GO:0110053	regulation of actin filament organization	3/43	270/18800	0.0236967	0.0795767	0.0447829	ALOX15/CAPG/PIK3CA	3
BP	GO:0006576	cellular biogenic amine metabolic process	2/43	105/18800	0.0240441	0.0801446	0.0451025	DRD4/EPAS1	2
BP	GO:0008585	female gonad development	2/43	105/18800	0.0240441	0.0801446	0.0451025	ATM/SIRT1	2
BP	GO:0046034	ATP metabolic process	3/43	273/18800	0.0243835	0.0801446	0.0451025	DDIT4/SLC2A6/TP53	3
BP	GO:0006090	pyruvate metabolic process	2/43	106/18800	0.0244714	0.0801446	0.0451025	DDIT4/SLC2A6	2
BP	GO:0019395	fatty acid oxidation	2/43	106/18800	0.0244714	0.0801446	0.0451025	ALOX12/ALOX15	2
BP	GO:0010638	positive regulation of organelle organization	4/43	487/18800	0.0247597	0.0801446	0.0451025	ALOX15/ATM/RB1/TP53	4
BP	GO:0001660	fever generation	1/43	11/18800	0.0248804	0.0801446	0.0451025	PTGS2	1
BP	GO:0002327	immature B cell differentiation	1/43	11/18800	0.0248804	0.0801446	0.0451025	ATM	1
BP	GO:0031987	locomotion involved in locomotory behavior	1/43	11/18800	0.0248804	0.0801446	0.0451025	ARRDC3	1
BP	GO:0032329	serine transport	1/43	11/18800	0.0248804	0.0801446	0.0451025	SLC1A5	1
BP	GO:0033210	leptin-mediated signaling pathway	1/43	11/18800	0.0248804	0.0801446	0.0451025	SIRT1	1
BP	GO:0033632	regulation of cell-cell adhesion mediated by integrin	1/43	11/18800	0.0248804	0.0801446	0.0451025	DPP4	1
BP	GO:0036490	regulation of translation in response to endoplasmic reticulum stress	1/43	11/18800	0.0248804	0.0801446	0.0451025	EIF2AK4	1
BP	GO:0042167	heme catabolic process	1/43	11/18800	0.0248804	0.0801446	0.0451025	HMOX1	1
BP	GO:0043471	regulation of cellular carbohydrate catabolic process	1/43	11/18800	0.0248804	0.0801446	0.0451025	TP53	1
BP	GO:0045060	negative thymic T cell selection	1/43	11/18800	0.0248804	0.0801446	0.0451025	ATG5	1
BP	GO:0046149	pigment catabolic process	1/43	11/18800	0.0248804	0.0801446	0.0451025	HMOX1	1
BP	GO:0048262	determination of dorsal/ventral asymmetry	1/43	11/18800	0.0248804	0.0801446	0.0451025	DDIT3	1
BP	GO:0070243	regulation of thymocyte apoptotic process	1/43	11/18800	0.0248804	0.0801446	0.0451025	TP53	1
BP	GO:0070778	L-aspartate transmembrane transport	1/43	11/18800	0.0248804	0.0801446	0.0451025	SLC1A5	1
BP	GO:0071044	histone mRNA catabolic process	1/43	11/18800	0.0248804	0.0801446	0.0451025	ATM	1
BP	GO:0071514	genomic imprinting	1/43	11/18800	0.0248804	0.0801446	0.0451025	PIK3CA	1
BP	GO:0106049	regulation of cellular response to osmotic stress	1/43	11/18800	0.0248804	0.0801446	0.0451025	PTGS2	1
BP	GO:1901533	negative regulation of hematopoietic progenitor cell differentiation	1/43	11/18800	0.0248804	0.0801446	0.0451025	MYB	1
BP	GO:1903799	negative regulation of production of miRNAs involved in gene silencing by miRNA	1/43	11/18800	0.0248804	0.0801446	0.0451025	TP53	1
BP	GO:2000480	negative regulation of cAMP-dependent protein kinase activity	1/43	11/18800	0.0248804	0.0801446	0.0451025	SIRT1	1
BP	GO:0008637	apoptotic mitochondrial changes	2/43	107/18800	0.0249018	0.0801446	0.0451025	ATG3/TP53	2
BP	GO:0033138	positive regulation of peptidyl-serine phosphorylation	2/43	107/18800	0.0249018	0.0801446	0.0451025	PIK3CA/PTGS2	2
BP	GO:0043410	positive regulation of MAPK cascade	4/43	491/18800	0.0254192	0.0815619	0.0459001	ALOX15/DRD4/JUN/TLR4	4
BP	GO:0048285	organelle fission	4/43	493/18800	0.0257529	0.0815619	0.0459001	ATM/CHMP5/RB1/SLC2A8	4
BP	GO:0046545	development of primary female sexual characteristics	2/43	109/18800	0.025772	0.0815619	0.0459001	ATM/SIRT1	2
BP	GO:0071887	leukocyte apoptotic process	2/43	109/18800	0.025772	0.0815619	0.0459001	SIRT1/TP53	2
BP	GO:0046942	carboxylic acid transport	3/43	279/18800	0.0257895	0.0815619	0.0459001	DRD4/SLC1A5/SLC7A5	3
BP	GO:0072503	cellular divalent inorganic cation homeostasis	4/43	494/18800	0.0259208	0.0815619	0.0459001	ATG5/DDIT3/DRD4/MT1G	4
BP	GO:0051223	regulation of protein transport	4/43	495/18800	0.0260893	0.0815619	0.0459001	ACSL4/DRD4/PTGS2/TLR4	4
BP	GO:1901222	regulation of NIK/NF-kappaB signaling	2/43	110/18800	0.0262116	0.0815619	0.0459001	PRDX1/TLR4	2
BP	GO:0007548	sex differentiation	3/43	281/18800	0.0262678	0.0815619	0.0459001	ATM/NCOA4/SIRT1	3
BP	GO:0007088	regulation of mitotic nuclear division	2/43	111/18800	0.0266544	0.0815619	0.0459001	ATM/RB1	2
BP	GO:0048640	negative regulation of developmental growth	2/43	111/18800	0.0266544	0.0815619	0.0459001	CDKN1A/ULK2	2
BP	GO:1902105	regulation of leukocyte differentiation	3/43	283/18800	0.0267508	0.0815619	0.0459001	MYB/RB1/TLR4	3
BP	GO:0009185	ribonucleoside diphosphate metabolic process	2/43	112/18800	0.0271002	0.0815619	0.0459001	DDIT4/SLC2A6	2
BP	GO:0034440	lipid oxidation	2/43	112/18800	0.0271002	0.0815619	0.0459001	ALOX12/ALOX15	2
BP	GO:0000012	single strand break repair	1/43	12/18800	0.027112	0.0815619	0.0459001	SIRT1	1
BP	GO:0002887	negative regulation of myeloid leukocyte mediated immunity	1/43	12/18800	0.027112	0.0815619	0.0459001	HMOX1	1
BP	GO:0006534	cysteine metabolic process	1/43	12/18800	0.027112	0.0815619	0.0459001	CBS	1
BP	GO:0006563	L-serine metabolic process	1/43	12/18800	0.027112	0.0815619	0.0459001	CBS	1
BP	GO:0006787	porphyrin-containing compound catabolic process	1/43	12/18800	0.027112	0.0815619	0.0459001	HMOX1	1
BP	GO:0014854	response to inactivity	1/43	12/18800	0.027112	0.0815619	0.0459001	PIK3CA	1
BP	GO:0015803	branched-chain amino acid transport	1/43	12/18800	0.027112	0.0815619	0.0459001	SLC7A5	1
BP	GO:0019321	pentose metabolic process	1/43	12/18800	0.027112	0.0815619	0.0459001	PGD	1
BP	GO:0031953	negative regulation of protein autophosphorylation	1/43	12/18800	0.027112	0.0815619	0.0459001	JUN	1
BP	GO:0032490	detection of molecule of bacterial origin	1/43	12/18800	0.027112	0.0815619	0.0459001	TLR4	1
BP	GO:0033015	tetrapyrrole catabolic process	1/43	12/18800	0.027112	0.0815619	0.0459001	HMOX1	1
BP	GO:0034086	maintenance of sister chromatid cohesion	1/43	12/18800	0.027112	0.0815619	0.0459001	RB1	1
BP	GO:0034088	maintenance of mitotic sister chromatid cohesion	1/43	12/18800	0.027112	0.0815619	0.0459001	RB1	1
BP	GO:0043383	negative T cell selection	1/43	12/18800	0.027112	0.0815619	0.0459001	ATG5	1
BP	GO:0048521	negative regulation of behavior	1/43	12/18800	0.027112	0.0815619	0.0459001	ARRDC3	1
BP	GO:0051573	negative regulation of histone H3-K9 methylation	1/43	12/18800	0.027112	0.0815619	0.0459001	SIRT1	1
BP	GO:0051583	dopamine uptake involved in synaptic transmission	1/43	12/18800	0.027112	0.0815619	0.0459001	DRD4	1
BP	GO:0051934	catecholamine uptake involved in synaptic transmission	1/43	12/18800	0.027112	0.0815619	0.0459001	DRD4	1
BP	GO:0070254	mucus secretion	1/43	12/18800	0.027112	0.0815619	0.0459001	ATG5	1
BP	GO:0070417	cellular response to cold	1/43	12/18800	0.027112	0.0815619	0.0459001	EIF2AK4	1
BP	GO:0070857	regulation of bile acid biosynthetic process	1/43	12/18800	0.027112	0.0815619	0.0459001	SIRT1	1
BP	GO:0090331	negative regulation of platelet aggregation	1/43	12/18800	0.027112	0.0815619	0.0459001	ALOX12	1
BP	GO:0097201	negative regulation of transcription from RNA polymerase II promoter in response to stress	1/43	12/18800	0.027112	0.0815619	0.0459001	JUN	1
BP	GO:0098884	postsynaptic neurotransmitter receptor internalization	1/43	12/18800	0.027112	0.0815619	0.0459001	DRD4	1
BP	GO:0106072	negative regulation of adenylate cyclase-activating G protein-coupled receptor signaling pathway	1/43	12/18800	0.027112	0.0815619	0.0459001	ARRDC3	1
BP	GO:0140052	cellular response to oxidised low-density lipoprotein particle stimulus	1/43	12/18800	0.027112	0.0815619	0.0459001	TLR4	1
BP	GO:0140239	postsynaptic endocytosis	1/43	12/18800	0.027112	0.0815619	0.0459001	DRD4	1
BP	GO:1900112	regulation of histone H3-K9 trimethylation	1/43	12/18800	0.027112	0.0815619	0.0459001	SIRT1	1
BP	GO:1900227	positive regulation of NLRP3 inflammasome complex assembly	1/43	12/18800	0.027112	0.0815619	0.0459001	TLR4	1
BP	GO:1901524	regulation of mitophagy	1/43	12/18800	0.027112	0.0815619	0.0459001	TP53	1
BP	GO:1903624	regulation of DNA catabolic process	1/43	12/18800	0.027112	0.0815619	0.0459001	ATM	1
BP	GO:1903800	positive regulation of production of miRNAs involved in gene silencing by miRNA	1/43	12/18800	0.027112	0.0815619	0.0459001	TP53	1
BP	GO:1990253	cellular response to leucine starvation	1/43	12/18800	0.027112	0.0815619	0.0459001	EIF2AK4	1
BP	GO:0018958	phenol-containing compound metabolic process	2/43	113/18800	0.027549	0.082647	0.0465108	DRD4/EPAS1	2
BP	GO:1904659	glucose transmembrane transport	2/43	113/18800	0.027549	0.082647	0.0465108	SLC2A6/SLC2A8	2
BP	GO:0098813	nuclear chromosome segregation	3/43	287/18800	0.0277313	0.0830788	0.0467538	ATM/CHMP5/RB1	3
BP	GO:0007249	I-kappaB kinase/NF-kappaB signaling	3/43	288/18800	0.0279794	0.0837063	0.0471069	HMOX1/SIRT1/TLR4	3
BP	GO:0002821	positive regulation of adaptive immune response	2/43	115/18800	0.0284557	0.0843829	0.0474877	EIF2AK4/SIRT1	2
BP	GO:0030518	intracellular steroid hormone receptor signaling pathway	2/43	115/18800	0.0284557	0.0843829	0.0474877	NCOA4/SIRT1	2
BP	GO:1990748	cellular detoxification	2/43	115/18800	0.0284557	0.0843829	0.0474877	PRDX1/PTGS2	2
BP	GO:0051607	defense response to virus	3/43	290/18800	0.0284792	0.0843829	0.0474877	ATG5/DDIT4/EIF2AK4	3
BP	GO:0022409	positive regulation of cell-cell adhesion	3/43	291/18800	0.0287309	0.0843829	0.0474877	DPP4/MYB/PIK3CA	3
BP	GO:0140546	defense response to symbiont	3/43	291/18800	0.0287309	0.0843829	0.0474877	ATG5/DDIT4/EIF2AK4	3
BP	GO:0043406	positive regulation of MAP kinase activity	2/43	116/18800	0.0289135	0.0843829	0.0474877	DRD4/TLR4	2
BP	GO:0044106	cellular amine metabolic process	2/43	116/18800	0.0289135	0.0843829	0.0474877	DRD4/EPAS1	2
BP	GO:0051222	positive regulation of protein transport	3/43	293/18800	0.0292378	0.0843829	0.0474877	ACSL4/PTGS2/TLR4	3
BP	GO:0140014	mitotic nuclear division	3/43	293/18800	0.0292378	0.0843829	0.0474877	ATM/CHMP5/RB1	3
BP	GO:0009415	response to water	1/43	13/18800	0.0293386	0.0843829	0.0474877	PIK3CA	1
BP	GO:0015801	aromatic amino acid transport	1/43	13/18800	0.0293386	0.0843829	0.0474877	SLC7A5	1
BP	GO:0036005	response to macrophage colony-stimulating factor	1/43	13/18800	0.0293386	0.0843829	0.0474877	TLR4	1
BP	GO:0036006	cellular response to macrophage colony-stimulating factor stimulus	1/43	13/18800	0.0293386	0.0843829	0.0474877	TLR4	1
BP	GO:0045820	negative regulation of glycolytic process	1/43	13/18800	0.0293386	0.0843829	0.0474877	DDIT4	1
BP	GO:0046761	viral budding from plasma membrane	1/43	13/18800	0.0293386	0.0843829	0.0474877	CHMP5	1
BP	GO:0050667	homocysteine metabolic process	1/43	13/18800	0.0293386	0.0843829	0.0474877	CBS	1
BP	GO:0061029	eyelid development in camera-type eye	1/43	13/18800	0.0293386	0.0843829	0.0474877	JUN	1
BP	GO:0061418	regulation of transcription from RNA polymerase II promoter in response to hypoxia	1/43	13/18800	0.0293386	0.0843829	0.0474877	TP53	1
BP	GO:0061744	motor behavior	1/43	13/18800	0.0293386	0.0843829	0.0474877	DPP4	1
BP	GO:0070234	positive regulation of T cell apoptotic process	1/43	13/18800	0.0293386	0.0843829	0.0474877	TP53	1
BP	GO:0070424	regulation of nucleotide-binding oligomerization domain containing signaling pathway	1/43	13/18800	0.0293386	0.0843829	0.0474877	TLR4	1
BP	GO:0070914	UV-damage excision repair	1/43	13/18800	0.0293386	0.0843829	0.0474877	SIRT1	1
BP	GO:0071481	cellular response to X-ray	1/43	13/18800	0.0293386	0.0843829	0.0474877	ATM	1
BP	GO:0071888	macrophage apoptotic process	1/43	13/18800	0.0293386	0.0843829	0.0474877	SIRT1	1
BP	GO:1903025	regulation of RNA polymerase II regulatory region sequence-specific DNA binding	1/43	13/18800	0.0293386	0.0843829	0.0474877	DDIT3	1
BP	GO:1903054	negative regulation of extracellular matrix organization	1/43	13/18800	0.0293386	0.0843829	0.0474877	DPP4	1
BP	GO:0002761	regulation of myeloid leukocyte differentiation	2/43	117/18800	0.0293743	0.0843829	0.0474877	RB1/TLR4	2
BP	GO:0008645	hexose transmembrane transport	2/43	117/18800	0.0293743	0.0843829	0.0474877	SLC2A6/SLC2A8	2
BP	GO:0042752	regulation of circadian rhythm	2/43	117/18800	0.0293743	0.0843829	0.0474877	DRD4/TP53	2
BP	GO:0051261	protein depolymerization	2/43	118/18800	0.029838	0.0853754	0.0480462	CAPG/PIK3CA	2
BP	GO:0071346	cellular response to interferon-gamma	2/43	118/18800	0.029838	0.0853754	0.0480462	TLR4/TP53	2
BP	GO:1904019	epithelial cell apoptotic process	2/43	118/18800	0.029838	0.0853754	0.0480462	HMOX1/RB1	2
BP	GO:0021700	developmental maturation	3/43	296/18800	0.0300072	0.0856332	0.0481913	DDIT3/EPAS1/RB1	3
BP	GO:0043588	skin development	3/43	296/18800	0.0300072	0.0856332	0.0481913	ALOX12/ARRDC3/TXNIP	3
BP	GO:0048511	rhythmic process	3/43	297/18800	0.030266	0.0862549	0.0485412	DRD4/SIRT1/TP53	3
BP	GO:0015749	monosaccharide transmembrane transport	2/43	119/18800	0.0303047	0.0862549	0.0485412	SLC2A6/SLC2A8	2
BP	GO:0051047	positive regulation of secretion	3/43	300/18800	0.0310497	0.0873047	0.049132	ACSL4/ATG5/TLR4	3
BP	GO:0007041	lysosomal transport	2/43	121/18800	0.0312468	0.0873047	0.049132	CHMP5/NCOA4	2
BP	GO:0009308	amine metabolic process	2/43	121/18800	0.0312468	0.0873047	0.049132	DRD4/EPAS1	2
BP	GO:0030282	bone mineralization	2/43	121/18800	0.0312468	0.0873047	0.049132	ALOX15/PTGS2	2
BP	GO:0051209	release of sequestered calcium ion into cytosol	2/43	121/18800	0.0312468	0.0873047	0.049132	ATG5/DDIT3	2
BP	GO:0002756	MyD88-independent toll-like receptor signaling pathway	1/43	14/18800	0.0315603	0.0873047	0.049132	TLR4	1
BP	GO:0009071	serine family amino acid catabolic process	1/43	14/18800	0.0315603	0.0873047	0.049132	CBS	1
BP	GO:0010225	response to UV-C	1/43	14/18800	0.0315603	0.0873047	0.049132	TP53	1
BP	GO:0033004	negative regulation of mast cell activation	1/43	14/18800	0.0315603	0.0873047	0.049132	HMOX1	1
BP	GO:0034111	negative regulation of homotypic cell-cell adhesion	1/43	14/18800	0.0315603	0.0873047	0.049132	ALOX12	1
BP	GO:0042117	monocyte activation	1/43	14/18800	0.0315603	0.0873047	0.049132	MT1G	1
BP	GO:0043201	response to leucine	1/43	14/18800	0.0315603	0.0873047	0.049132	PIK3CA	1
BP	GO:0043301	negative regulation of leukocyte degranulation	1/43	14/18800	0.0315603	0.0873047	0.049132	HMOX1	1
BP	GO:0043558	regulation of translational initiation in response to stress	1/43	14/18800	0.0315603	0.0873047	0.049132	EIF2AK4	1
BP	GO:0043922	negative regulation by host of viral transcription	1/43	14/18800	0.0315603	0.0873047	0.049132	JUN	1
BP	GO:0046753	non-lytic viral release	1/43	14/18800	0.0315603	0.0873047	0.049132	CHMP5	1
BP	GO:0047484	regulation of response to osmotic stress	1/43	14/18800	0.0315603	0.0873047	0.049132	PTGS2	1
BP	GO:0048148	behavioral response to cocaine	1/43	14/18800	0.0315603	0.0873047	0.049132	DRD4	1
BP	GO:0055012	ventricular cardiac muscle cell differentiation	1/43	14/18800	0.0315603	0.0873047	0.049132	ATG5	1
BP	GO:0061709	reticulophagy	1/43	14/18800	0.0315603	0.0873047	0.049132	ULK2	1
BP	GO:0071236	cellular response to antibiotic	1/43	14/18800	0.0315603	0.0873047	0.049132	TP53	1
BP	GO:1902947	regulation of tau-protein kinase activity	1/43	14/18800	0.0315603	0.0873047	0.049132	RB1	1
BP	GO:0007613	memory	2/43	122/18800	0.0317222	0.087529	0.0492582	EIF2AK4/PTGS2	2
BP	GO:0051283	negative regulation of sequestering of calcium ion	2/43	122/18800	0.0317222	0.087529	0.0492582	ATG5/DDIT3	2
BP	GO:0002244	hematopoietic progenitor cell differentiation	2/43	123/18800	0.0322005	0.0883983	0.0497474	MYB/TP53	2
BP	GO:0010906	regulation of glucose metabolic process	2/43	123/18800	0.0322005	0.0883983	0.0497474	SIRT1/TP53	2
BP	GO:0032355	response to estradiol	2/43	123/18800	0.0322005	0.0883983	0.0497474	PTGS2/TXNIP	2
BP	GO:0097237	cellular response to toxic substance	2/43	123/18800	0.0322005	0.0883983	0.0497474	PRDX1/PTGS2	2
BP	GO:0030218	erythrocyte differentiation	2/43	124/18800	0.0326816	0.0893793	0.0502995	EPAS1/RB1	2
BP	GO:0046660	female sex differentiation	2/43	124/18800	0.0326816	0.0893793	0.0502995	ATM/SIRT1	2
BP	GO:0051282	regulation of sequestering of calcium ion	2/43	124/18800	0.0326816	0.0893793	0.0502995	ATG5/DDIT3	2
BP	GO:0006650	glycerophospholipid metabolic process	3/43	309/18800	0.033465	0.0898783	0.0505803	ALOX15/ATM/PIK3CA	3
BP	GO:1904951	positive regulation of establishment of protein localization	3/43	309/18800	0.033465	0.0898783	0.0505803	ACSL4/PTGS2/TLR4	3
BP	GO:0002730	regulation of dendritic cell cytokine production	1/43	15/18800	0.033777	0.0898783	0.0505803	TLR4	1
BP	GO:0007000	nucleolus organization	1/43	15/18800	0.033777	0.0898783	0.0505803	SIRT1	1
BP	GO:0010273	detoxification of copper ion	1/43	15/18800	0.033777	0.0898783	0.0505803	MT1G	1
BP	GO:0033127	regulation of histone phosphorylation	1/43	15/18800	0.033777	0.0898783	0.0505803	ATM	1
BP	GO:0042415	norepinephrine metabolic process	1/43	15/18800	0.033777	0.0898783	0.0505803	EPAS1	1
BP	GO:0043129	surfactant homeostasis	1/43	15/18800	0.033777	0.0898783	0.0505803	EPAS1	1
BP	GO:0043517	positive regulation of DNA damage response, signal transduction by p53 class mediator	1/43	15/18800	0.033777	0.0898783	0.0505803	ATM	1
BP	GO:0043518	negative regulation of DNA damage response, signal transduction by p53 class mediator	1/43	15/18800	0.033777	0.0898783	0.0505803	SIRT1	1
BP	GO:0044793	negative regulation by host of viral process	1/43	15/18800	0.033777	0.0898783	0.0505803	EIF2AK4	1
BP	GO:0045842	positive regulation of mitotic metaphase/anaphase transition	1/43	15/18800	0.033777	0.0898783	0.0505803	RB1	1
BP	GO:0060080	inhibitory postsynaptic potential	1/43	15/18800	0.033777	0.0898783	0.0505803	DRD4	1
BP	GO:0060099	regulation of phagocytosis, engulfment	1/43	15/18800	0.033777	0.0898783	0.0505803	ALOX15	1
BP	GO:0060766	negative regulation of androgen receptor signaling pathway	1/43	15/18800	0.033777	0.0898783	0.0505803	SIRT1	1
BP	GO:0070207	protein homotrimerization	1/43	15/18800	0.033777	0.0898783	0.0505803	SLC1A5	1
BP	GO:0106070	regulation of adenylate cyclase-activating G protein-coupled receptor signaling pathway	1/43	15/18800	0.033777	0.0898783	0.0505803	ARRDC3	1
BP	GO:1901970	positive regulation of mitotic sister chromatid separation	1/43	15/18800	0.033777	0.0898783	0.0505803	RB1	1
BP	GO:1902166	negative regulation of intrinsic apoptotic signaling pathway in response to DNA damage by p53 class mediator	1/43	15/18800	0.033777	0.0898783	0.0505803	SIRT1	1
BP	GO:1904251	regulation of bile acid metabolic process	1/43	15/18800	0.033777	0.0898783	0.0505803	SIRT1	1
BP	GO:1905153	regulation of membrane invagination	1/43	15/18800	0.033777	0.0898783	0.0505803	ALOX15	1
BP	GO:1990169	stress response to copper ion	1/43	15/18800	0.033777	0.0898783	0.0505803	MT1G	1
BP	GO:0070372	regulation of ERK1 and ERK2 cascade	3/43	311/18800	0.0340147	0.0903999	0.0508738	ALOX15/JUN/TLR4	3
BP	GO:0034968	histone lysine methylation	2/43	127/18800	0.034142	0.090627	0.0510017	MYB/SIRT1	2
BP	GO:0050714	positive regulation of protein secretion	2/43	128/18800	0.0346345	0.0917094	0.0516108	ACSL4/TLR4	2
BP	GO:0051208	sequestering of calcium ion	2/43	128/18800	0.0346345	0.0917094	0.0516108	ATG5/DDIT3	2
BP	GO:0070588	calcium ion transmembrane transport	3/43	314/18800	0.0348482	0.0921628	0.0518659	ATG5/DDIT3/DRD4	3
BP	GO:2001022	positive regulation of response to DNA damage stimulus	2/43	129/18800	0.0351297	0.0924693	0.0520384	ATM/SIRT1	2
BP	GO:0007127	meiosis I	2/43	130/18800	0.0356277	0.0924693	0.0520384	ATM/SLC2A8	2
BP	GO:0009132	nucleoside diphosphate metabolic process	2/43	130/18800	0.0356277	0.0924693	0.0520384	DDIT4/SLC2A6	2
BP	GO:0017015	regulation of transforming growth factor beta receptor signaling pathway	2/43	130/18800	0.0356277	0.0924693	0.0520384	SIRT1/TP53	2
BP	GO:0015849	organic acid transport	3/43	318/18800	0.0359761	0.0924693	0.0520384	DRD4/SLC1A5/SLC7A5	3
BP	GO:0002371	dendritic cell cytokine production	1/43	16/18800	0.0359887	0.0924693	0.0520384	TLR4	1
BP	GO:0006089	lactate metabolic process	1/43	16/18800	0.0359887	0.0924693	0.0520384	TP53	1
BP	GO:0010224	response to UV-B	1/43	16/18800	0.0359887	0.0924693	0.0520384	CDKN1A	1
BP	GO:0010715	regulation of extracellular matrix disassembly	1/43	16/18800	0.0359887	0.0924693	0.0520384	DPP4	1
BP	GO:0018410	C-terminal protein amino acid modification	1/43	16/18800	0.0359887	0.0924693	0.0520384	ATG5	1
BP	GO:0035641	locomotory exploration behavior	1/43	16/18800	0.0359887	0.0924693	0.0520384	DPP4	1
BP	GO:0042159	lipoprotein catabolic process	1/43	16/18800	0.0359887	0.0924693	0.0520384	ATM	1
BP	GO:0045651	positive regulation of macrophage differentiation	1/43	16/18800	0.0359887	0.0924693	0.0520384	RB1	1
BP	GO:0045986	negative regulation of smooth muscle contraction	1/43	16/18800	0.0359887	0.0924693	0.0520384	PTGS2	1
BP	GO:0050872	white fat cell differentiation	1/43	16/18800	0.0359887	0.0924693	0.0520384	SIRT1	1
BP	GO:0051014	actin filament severing	1/43	16/18800	0.0359887	0.0924693	0.0520384	CAPG	1
BP	GO:0061684	chaperone-mediated autophagy	1/43	16/18800	0.0359887	0.0924693	0.0520384	ATG5	1
BP	GO:0070242	thymocyte apoptotic process	1/43	16/18800	0.0359887	0.0924693	0.0520384	TP53	1
BP	GO:0070431	nucleotide-binding oligomerization domain containing 2 signaling pathway	1/43	16/18800	0.0359887	0.0924693	0.0520384	TLR4	1
BP	GO:0071391	cellular response to estrogen stimulus	1/43	16/18800	0.0359887	0.0924693	0.0520384	NCOA4	1
BP	GO:0090336	positive regulation of brown fat cell differentiation	1/43	16/18800	0.0359887	0.0924693	0.0520384	PTGS2	1
BP	GO:1901096	regulation of autophagosome maturation	1/43	16/18800	0.0359887	0.0924693	0.0520384	ATG5	1
BP	GO:1902101	positive regulation of metaphase/anaphase transition of cell cycle	1/43	16/18800	0.0359887	0.0924693	0.0520384	RB1	1
BP	GO:2000651	positive regulation of sodium ion transmembrane transporter activity	1/43	16/18800	0.0359887	0.0924693	0.0520384	DRD4	1
BP	GO:0007098	centrosome cycle	2/43	131/18800	0.0361284	0.0926085	0.0521168	CHMP5/SIRT1	2
BP	GO:0034219	carbohydrate transmembrane transport	2/43	131/18800	0.0361284	0.0926085	0.0521168	SLC2A6/SLC2A8	2
BP	GO:0010565	regulation of cellular ketone metabolic process	2/43	132/18800	0.0366319	0.0937882	0.0527806	PTGS2/SIRT1	2
BP	GO:0015980	energy derivation by oxidation of organic compounds	3/43	321/18800	0.0368344	0.0941952	0.0530097	CISD1/PIK3CA/TP53	3
BP	GO:1903844	regulation of cellular response to transforming growth factor beta stimulus	2/43	133/18800	0.0371382	0.09486	0.0533838	SIRT1/TP53	2
BP	GO:0006352	DNA-templated transcription, initiation	2/43	134/18800	0.0376471	0.0948756	0.0533926	JUN/TP53	2
BP	GO:0006661	phosphatidylinositol biosynthetic process	2/43	134/18800	0.0376471	0.0948756	0.0533926	ATM/PIK3CA	2
BP	GO:0019079	viral genome replication	2/43	134/18800	0.0376471	0.0948756	0.0533926	ATG5/EIF2AK4	2
BP	GO:0043401	steroid hormone mediated signaling pathway	2/43	135/18800	0.0381588	0.0948756	0.0533926	NCOA4/SIRT1	2
BP	GO:0090101	negative regulation of transmembrane receptor protein serine/threonine kinase signaling pathway	2/43	135/18800	0.0381588	0.0948756	0.0533926	SIRT1/TP53	2
BP	GO:0000097	sulfur amino acid biosynthetic process	1/43	17/18800	0.0381955	0.0948756	0.0533926	CBS	1
BP	GO:0010663	positive regulation of striated muscle cell apoptotic process	1/43	17/18800	0.0381955	0.0948756	0.0533926	TP53	1
BP	GO:0010666	positive regulation of cardiac muscle cell apoptotic process	1/43	17/18800	0.0381955	0.0948756	0.0533926	TP53	1
BP	GO:0033631	cell-cell adhesion mediated by integrin	1/43	17/18800	0.0381955	0.0948756	0.0533926	DPP4	1
BP	GO:0036124	histone H3-K9 trimethylation	1/43	17/18800	0.0381955	0.0948756	0.0533926	SIRT1	1
BP	GO:0043923	positive regulation by host of viral transcription	1/43	17/18800	0.0381955	0.0948756	0.0533926	JUN	1
BP	GO:0048875	chemical homeostasis within a tissue	1/43	17/18800	0.0381955	0.0948756	0.0533926	EPAS1	1
BP	GO:0051580	regulation of neurotransmitter uptake	1/43	17/18800	0.0381955	0.0948756	0.0533926	DRD4	1
BP	GO:0051770	positive regulation of nitric-oxide synthase biosynthetic process	1/43	17/18800	0.0381955	0.0948756	0.0533926	TLR4	1
BP	GO:0055089	fatty acid homeostasis	1/43	17/18800	0.0381955	0.0948756	0.0533926	SIRT1	1
BP	GO:0055119	relaxation of cardiac muscle	1/43	17/18800	0.0381955	0.0948756	0.0533926	PIK3CA	1
BP	GO:0061952	midbody abscission	1/43	17/18800	0.0381955	0.0948756	0.0533926	CHMP5	1
BP	GO:0070206	protein trimerization	1/43	17/18800	0.0381955	0.0948756	0.0533926	SLC1A5	1
BP	GO:0070230	positive regulation of lymphocyte apoptotic process	1/43	17/18800	0.0381955	0.0948756	0.0533926	TP53	1
BP	GO:0070932	histone H3 deacetylation	1/43	17/18800	0.0381955	0.0948756	0.0533926	SIRT1	1
BP	GO:0090494	dopamine uptake	1/43	17/18800	0.0381955	0.0948756	0.0533926	DRD4	1
BP	GO:1902165	regulation of intrinsic apoptotic signaling pathway in response to DNA damage by p53 class mediator	1/43	17/18800	0.0381955	0.0948756	0.0533926	SIRT1	1
BP	GO:2000774	positive regulation of cellular senescence	1/43	17/18800	0.0381955	0.0948756	0.0533926	SIRT1	1
BP	GO:2000811	negative regulation of anoikis	1/43	17/18800	0.0381955	0.0948756	0.0533926	PIK3CA	1
BP	GO:0061982	meiosis I cell cycle process	2/43	136/18800	0.0386731	0.0959518	0.0539982	ATM/SLC2A8	2
BP	GO:0048638	regulation of developmental growth	3/43	329/18800	0.0391748	0.0970855	0.0546362	CDKN1A/PIK3CA/ULK2	3
BP	GO:0006997	nucleus organization	2/43	138/18800	0.0397097	0.0975482	0.0548967	CHMP5/SIRT1	2
BP	GO:0043414	macromolecule methylation	3/43	331/18800	0.0397717	0.0975482	0.0548967	MYB/PIK3CA/SIRT1	3
BP	GO:0051235	maintenance of location	3/43	331/18800	0.0397717	0.0975482	0.0548967	ATG5/DDIT3/SIRT1	3
BP	GO:0030833	regulation of actin filament polymerization	2/43	139/18800	0.040232	0.0975482	0.0548967	ALOX15/CAPG	2
BP	GO:0051783	regulation of nuclear division	2/43	139/18800	0.040232	0.0975482	0.0548967	ATM/RB1	2
BP	GO:0032496	response to lipopolysaccharide	3/43	333/18800	0.0403731	0.0975482	0.0548967	CHMP5/PTGS2/TLR4	3
BP	GO:0010940	positive regulation of necrotic cell death	1/43	18/18800	0.0403974	0.0975482	0.0548967	TP53	1
BP	GO:0030889	negative regulation of B cell proliferation	1/43	18/18800	0.0403974	0.0975482	0.0548967	ATM	1
BP	GO:0032511	late endosome to vacuole transport via multivesicular body sorting pathway	1/43	18/18800	0.0403974	0.0975482	0.0548967	CHMP5	1
BP	GO:0033151	V(D)J recombination	1/43	18/18800	0.0403974	0.0975482	0.0548967	ATM	1
BP	GO:0036499	PERK-mediated unfolded protein response	1/43	18/18800	0.0403974	0.0975482	0.0548967	DDIT3	1
BP	GO:0044320	cellular response to leptin stimulus	1/43	18/18800	0.0403974	0.0975482	0.0548967	SIRT1	1
BP	GO:0045116	protein neddylation	1/43	18/18800	0.0403974	0.0975482	0.0548967	EPAS1	1
BP	GO:0045722	positive regulation of gluconeogenesis	1/43	18/18800	0.0403974	0.0975482	0.0548967	SIRT1	1
BP	GO:0051782	negative regulation of cell division	1/43	18/18800	0.0403974	0.0975482	0.0548967	TXNIP	1
BP	GO:0060965	negative regulation of miRNA-mediated gene silencing	1/43	18/18800	0.0403974	0.0975482	0.0548967	TP53	1
BP	GO:0061687	detoxification of inorganic compound	1/43	18/18800	0.0403974	0.0975482	0.0548967	MT1G	1
BP	GO:0071318	cellular response to ATP	1/43	18/18800	0.0403974	0.0975482	0.0548967	PTGS2	1
BP	GO:0072567	chemokine (C-X-C motif) ligand 2 production	1/43	18/18800	0.0403974	0.0975482	0.0548967	TLR4	1
BP	GO:0090493	catecholamine uptake	1/43	18/18800	0.0403974	0.0975482	0.0548967	DRD4	1
BP	GO:0097284	hepatocyte apoptotic process	1/43	18/18800	0.0403974	0.0975482	0.0548967	RB1	1
BP	GO:1905820	positive regulation of chromosome separation	1/43	18/18800	0.0403974	0.0975482	0.0548967	RB1	1
BP	GO:2000341	regulation of chemokine (C-X-C motif) ligand 2 production	1/43	18/18800	0.0403974	0.0975482	0.0548967	TLR4	1
BP	GO:0000086	G2/M transition of mitotic cell cycle	2/43	140/18800	0.040757	0.0979795	0.0551394	ATM/CDKN1A	2
BP	GO:0034341	response to interferon-gamma	2/43	140/18800	0.040757	0.0979795	0.0551394	TLR4/TP53	2
BP	GO:0042157	lipoprotein metabolic process	2/43	140/18800	0.040757	0.0979795	0.0551394	ATG5/ATM	2
BP	GO:0050768	negative regulation of neurogenesis	2/43	140/18800	0.040757	0.0979795	0.0551394	TP53/ULK2	2
BP	GO:0070371	ERK1 and ERK2 cascade	3/43	335/18800	0.0409792	0.0984047	0.0553787	ALOX15/JUN/TLR4	3
BP	GO:0035296	regulation of tube diameter	2/43	141/18800	0.0412845	0.0987	0.0555448	ATG5/PTGS2	2
BP	GO:0038061	NIK/NF-kappaB signaling	2/43	141/18800	0.0412845	0.0987	0.0555448	PRDX1/TLR4	2
BP	GO:0050671	positive regulation of lymphocyte proliferation	2/43	141/18800	0.0412845	0.0987	0.0555448	CDKN1A/TLR4	2
BP	GO:0097746	blood vessel diameter maintenance	2/43	141/18800	0.0412845	0.0987	0.0555448	ATG5/PTGS2	2
BP	GO:0030183	B cell differentiation	2/43	142/18800	0.0418146	0.0996321	0.0560694	ATM/TP53	2
BP	GO:0035150	regulation of tube size	2/43	142/18800	0.0418146	0.0996321	0.0560694	ATG5/PTGS2	2
BP	GO:0018022	peptidyl-lysine methylation	2/43	143/18800	0.0423474	0.0996321	0.0560694	MYB/SIRT1	2
BP	GO:0032946	positive regulation of mononuclear cell proliferation	2/43	143/18800	0.0423474	0.0996321	0.0560694	CDKN1A/TLR4	2
BP	GO:1903531	negative regulation of secretion by cell	2/43	143/18800	0.0423474	0.0996321	0.0560694	DRD4/HMOX1	2
BP	GO:0010544	negative regulation of platelet activation	1/43	19/18800	0.0425943	0.0996321	0.0560694	ALOX12	1
BP	GO:0010801	negative regulation of peptidyl-threonine phosphorylation	1/43	19/18800	0.0425943	0.0996321	0.0560694	DDIT4	1
BP	GO:0035338	long-chain fatty-acyl-CoA biosynthetic process	1/43	19/18800	0.0425943	0.0996321	0.0560694	ACSL4	1
BP	GO:0043652	engulfment of apoptotic cell	1/43	19/18800	0.0425943	0.0996321	0.0560694	ALOX15	1
BP	GO:0045947	negative regulation of translational initiation	1/43	19/18800	0.0425943	0.0996321	0.0560694	EIF2AK4	1
BP	GO:0048670	regulation of collateral sprouting	1/43	19/18800	0.0425943	0.0996321	0.0560694	ULK2	1
BP	GO:0051152	positive regulation of smooth muscle cell differentiation	1/43	19/18800	0.0425943	0.0996321	0.0560694	SIRT1	1
BP	GO:0060149	negative regulation of post-transcriptional gene silencing	1/43	19/18800	0.0425943	0.0996321	0.0560694	TP53	1
BP	GO:0060967	negative regulation of gene silencing by RNA	1/43	19/18800	0.0425943	0.0996321	0.0560694	TP53	1
BP	GO:0097501	stress response to metal ion	1/43	19/18800	0.0425943	0.0996321	0.0560694	MT1G	1
BP	GO:0099590	neurotransmitter receptor internalization	1/43	19/18800	0.0425943	0.0996321	0.0560694	DRD4	1
BP	GO:1900369	negative regulation of post-transcriptional gene silencing by RNA	1/43	19/18800	0.0425943	0.0996321	0.0560694	TP53	1
BP	GO:1901386	negative regulation of voltage-gated calcium channel activity	1/43	19/18800	0.0425943	0.0996321	0.0560694	DRD4	1
BP	GO:1902774	late endosome to lysosome transport	1/43	19/18800	0.0425943	0.0996321	0.0560694	CHMP5	1
BP	GO:1904262	negative regulation of TORC1 signaling	1/43	19/18800	0.0425943	0.0996321	0.0560694	ATM	1
BP	GO:0014065	phosphatidylinositol 3-kinase signaling	2/43	144/18800	0.0428827	0.100198	0.0563881	PIK3CA/SIRT1	2
BP	GO:0050863	regulation of T cell activation	3/43	342/18800	0.0431372	0.100685	0.0566616	DPP4/MYB/PIK3CA	3
BP	GO:0006865	amino acid transport	2/43	145/18800	0.0434205	0.100803	0.0567281	SLC1A5/SLC7A5	2
BP	GO:0007612	learning	2/43	145/18800	0.0434205	0.100803	0.0567281	EIF2AK4/PTGS2	2
BP	GO:0031023	microtubule organizing center organization	2/43	145/18800	0.0434205	0.100803	0.0567281	CHMP5/SIRT1	2
BP	GO:0050729	positive regulation of inflammatory response	2/43	145/18800	0.0434205	0.100803	0.0567281	PTGS2/TLR4	2
BP	GO:0051961	negative regulation of nervous system development	2/43	145/18800	0.0434205	0.100803	0.0567281	TP53/ULK2	2
BP	GO:1903037	regulation of leukocyte cell-cell adhesion	3/43	344/18800	0.0437642	0.101492	0.0571159	DPP4/MYB/PIK3CA	3
BP	GO:0062013	positive regulation of small molecule metabolic process	2/43	146/18800	0.0439609	0.101839	0.0573113	PTGS2/SIRT1	2
BP	GO:0001890	placenta development	2/43	147/18800	0.0445039	0.101898	0.0573448	EPAS1/PTGS2	2
BP	GO:0006007	glucose catabolic process	1/43	20/18800	0.0447864	0.101898	0.0573448	TP53	1
BP	GO:0008334	histone mRNA metabolic process	1/43	20/18800	0.0447864	0.101898	0.0573448	ATM	1
BP	GO:0032495	response to muramyl dipeptide	1/43	20/18800	0.0447864	0.101898	0.0573448	CHMP5	1
BP	GO:0042053	regulation of dopamine metabolic process	1/43	20/18800	0.0447864	0.101898	0.0573448	DRD4	1
BP	GO:0042069	regulation of catecholamine metabolic process	1/43	20/18800	0.0447864	0.101898	0.0573448	DRD4	1
BP	GO:0043555	regulation of translation in response to stress	1/43	20/18800	0.0447864	0.101898	0.0573448	EIF2AK4	1
BP	GO:0044827	modulation by host of viral genome replication	1/43	20/18800	0.0447864	0.101898	0.0573448	EIF2AK4	1
BP	GO:0070314	G1 to G0 transition	1/43	20/18800	0.0447864	0.101898	0.0573448	TP53	1
BP	GO:0098543	detection of other organism	1/43	20/18800	0.0447864	0.101898	0.0573448	TLR4	1
BP	GO:1900225	regulation of NLRP3 inflammasome complex assembly	1/43	20/18800	0.0447864	0.101898	0.0573448	TLR4	1
BP	GO:1902176	negative regulation of oxidative stress-induced intrinsic apoptotic signaling pathway	1/43	20/18800	0.0447864	0.101898	0.0573448	SIRT1	1
BP	GO:1902307	positive regulation of sodium ion transmembrane transport	1/43	20/18800	0.0447864	0.101898	0.0573448	DRD4	1
BP	GO:1903209	positive regulation of oxidative stress-induced cell death	1/43	20/18800	0.0447864	0.101898	0.0573448	TLR4	1
BP	GO:1903978	regulation of microglial cell activation	1/43	20/18800	0.0447864	0.101898	0.0573448	ATM	1
BP	GO:2000479	regulation of cAMP-dependent protein kinase activity	1/43	20/18800	0.0447864	0.101898	0.0573448	SIRT1	1
BP	GO:2000678	negative regulation of transcription regulatory region DNA binding	1/43	20/18800	0.0447864	0.101898	0.0573448	DDIT3	1
BP	GO:0007059	chromosome segregation	3/43	348/18800	0.045032	0.10235	0.0575987	ATM/CHMP5/RB1	3
BP	GO:0044272	sulfur compound biosynthetic process	2/43	149/18800	0.0455973	0.103526	0.0582607	ACSL4/CBS	2
BP	GO:0009306	protein secretion	3/43	350/18800	0.0456727	0.103589	0.058296	ACSL4/DRD4/TLR4	3
BP	GO:0002831	regulation of response to biotic stimulus	3/43	351/18800	0.0459948	0.104101	0.0585844	ATG5/EIF2AK4/TLR4	3
BP	GO:0035592	establishment of protein localization to extracellular region	3/43	351/18800	0.0459948	0.104101	0.0585844	ACSL4/DRD4/TLR4	3
BP	GO:0007584	response to nutrient	2/43	150/18800	0.0461477	0.104246	0.0586662	HMOX1/PTGS2	2
BP	GO:0032956	regulation of actin cytoskeleton organization	3/43	352/18800	0.0463181	0.104246	0.0586662	ALOX15/CAPG/PIK3CA	3
BP	GO:0002237	response to molecule of bacterial origin	3/43	354/18800	0.046968	0.104246	0.0586662	CHMP5/PTGS2/TLR4	3
BP	GO:0003002	regionalization	3/43	354/18800	0.046968	0.104246	0.0586662	ATM/DDIT3/TP53	3
BP	GO:0000083	regulation of transcription involved in G1/S transition of mitotic cell cycle	1/43	21/18800	0.0469735	0.104246	0.0586662	RB1	1
BP	GO:0007063	regulation of sister chromatid cohesion	1/43	21/18800	0.0469735	0.104246	0.0586662	RB1	1
BP	GO:0007252	I-kappaB phosphorylation	1/43	21/18800	0.0469735	0.104246	0.0586662	TLR4	1
BP	GO:0009070	serine family amino acid biosynthetic process	1/43	21/18800	0.0469735	0.104246	0.0586662	CBS	1
BP	GO:0032069	regulation of nuclease activity	1/43	21/18800	0.0469735	0.104246	0.0586662	SIRT1	1
BP	GO:0032727	positive regulation of interferon-alpha production	1/43	21/18800	0.0469735	0.104246	0.0586662	TLR4	1
BP	GO:0045717	negative regulation of fatty acid biosynthetic process	1/43	21/18800	0.0469735	0.104246	0.0586662	SIRT1	1
BP	GO:0051767	nitric-oxide synthase biosynthetic process	1/43	21/18800	0.0469735	0.104246	0.0586662	TLR4	1
BP	GO:0051769	regulation of nitric-oxide synthase biosynthetic process	1/43	21/18800	0.0469735	0.104246	0.0586662	TLR4	1
BP	GO:0071243	cellular response to arsenic-containing substance	1/43	21/18800	0.0469735	0.104246	0.0586662	HMOX1	1
BP	GO:0071498	cellular response to fluid shear stress	1/43	21/18800	0.0469735	0.104246	0.0586662	PTGS2	1
BP	GO:0071636	positive regulation of transforming growth factor beta production	1/43	21/18800	0.0469735	0.104246	0.0586662	PTGS2	1
BP	GO:1900543	negative regulation of purine nucleotide metabolic process	1/43	21/18800	0.0469735	0.104246	0.0586662	DDIT4	1
BP	GO:2000178	negative regulation of neural precursor cell proliferation	1/43	21/18800	0.0469735	0.104246	0.0586662	TP53	1
BP	GO:2000773	negative regulation of cellular senescence	1/43	21/18800	0.0469735	0.104246	0.0586662	SIRT1	1
BP	GO:0050871	positive regulation of B cell activation	2/43	152/18800	0.047256	0.104659	0.0588984	CDKN1A/TLR4	2
BP	GO:1905039	carboxylic acid transmembrane transport	2/43	152/18800	0.047256	0.104659	0.0588984	SLC1A5/SLC7A5	2
BP	GO:1903825	organic acid transmembrane transport	2/43	153/18800	0.0478139	0.105786	0.0595328	SLC1A5/SLC7A5	2
BP	GO:0001678	cellular glucose homeostasis	2/43	154/18800	0.0483742	0.105942	0.0596201	PIK3CA/SIRT1	2
BP	GO:0097553	calcium ion transmembrane import into cytosol	2/43	154/18800	0.0483742	0.105942	0.0596201	ATG5/DDIT3	2
BP	GO:0071692	protein localization to extracellular region	3/43	359/18800	0.0486127	0.105942	0.0596201	ACSL4/DRD4/TLR4	3
BP	GO:0007034	vacuolar transport	2/43	155/18800	0.0489368	0.105942	0.0596201	CHMP5/NCOA4	2
BP	GO:0031503	protein-containing complex localization	2/43	155/18800	0.0489368	0.105942	0.0596201	ATM/DRD4	2
BP	GO:0043271	negative regulation of ion transport	2/43	155/18800	0.0489368	0.105942	0.0596201	DRD4/PTGS2	2
BP	GO:0001919	regulation of receptor recycling	1/43	22/18800	0.0491557	0.105942	0.0596201	CHMP5	1
BP	GO:0006925	inflammatory cell apoptotic process	1/43	22/18800	0.0491557	0.105942	0.0596201	SIRT1	1
BP	GO:0010042	response to manganese ion	1/43	22/18800	0.0491557	0.105942	0.0596201	PTGS2	1
BP	GO:0010226	response to lithium ion	1/43	22/18800	0.0491557	0.105942	0.0596201	PTGS2	1
BP	GO:0030277	maintenance of gastrointestinal epithelium	1/43	22/18800	0.0491557	0.105942	0.0596201	TLR4	1
BP	GO:0034755	iron ion transmembrane transport	1/43	22/18800	0.0491557	0.105942	0.0596201	SLC40A1	1
BP	GO:0039702	viral budding via host ESCRT complex	1/43	22/18800	0.0491557	0.105942	0.0596201	CHMP5	1
BP	GO:0044154	histone H3-K14 acetylation	1/43	22/18800	0.0491557	0.105942	0.0596201	SIRT1	1
BP	GO:0044321	response to leptin	1/43	22/18800	0.0491557	0.105942	0.0596201	SIRT1	1
BP	GO:0044546	NLRP3 inflammasome complex assembly	1/43	22/18800	0.0491557	0.105942	0.0596201	TLR4	1
BP	GO:0045061	thymic T cell selection	1/43	22/18800	0.0491557	0.105942	0.0596201	ATG5	1
BP	GO:0045624	positive regulation of T-helper cell differentiation	1/43	22/18800	0.0491557	0.105942	0.0596201	MYB	1
BP	GO:0045980	negative regulation of nucleotide metabolic process	1/43	22/18800	0.0491557	0.105942	0.0596201	DDIT4	1
BP	GO:0046628	positive regulation of insulin receptor signaling pathway	1/43	22/18800	0.0491557	0.105942	0.0596201	SIRT1	1
BP	GO:0051590	positive regulation of neurotransmitter transport	1/43	22/18800	0.0491557	0.105942	0.0596201	DRD4	1
BP	GO:1900273	positive regulation of long-term synaptic potentiation	1/43	22/18800	0.0491557	0.105942	0.0596201	EIF2AK4	1
BP	GO:1901673	regulation of mitotic spindle assembly	1/43	22/18800	0.0491557	0.105942	0.0596201	CHMP5	1
BP	GO:1903428	positive regulation of reactive oxygen species biosynthetic process	1/43	22/18800	0.0491557	0.105942	0.0596201	TLR4	1
BP	GO:1903589	positive regulation of blood vessel endothelial cell proliferation involved in sprouting angiogenesis	1/43	22/18800	0.0491557	0.105942	0.0596201	HMOX1	1
BP	GO:1903798	regulation of production of miRNAs involved in gene silencing by miRNA	1/43	22/18800	0.0491557	0.105942	0.0596201	TP53	1
BP	GO:0008643	carbohydrate transport	2/43	156/18800	0.0495019	0.106476	0.0599208	SLC2A6/SLC2A8	2
BP	GO:1903169	regulation of calcium ion transmembrane transport	2/43	156/18800	0.0495019	0.106476	0.0599208	ATG5/DRD4	2
BP	GO:0001818	negative regulation of cytokine production	3/43	363/18800	0.0499489	0.107331	0.0604018	DDIT3/HMOX1/TLR4	3
CC	GO:0005767	secondary lysosome	3/43	17/19594	6.5523e-06	0.000936979	0.000662127	MAP1LC3A/NCF2/NCOA4	3
CC	GO:0005776	autophagosome	4/43	112/19594	0.000105121	0.00553225	0.00390943	ATG5/CHMP5/MAP1LC3A/NCOA4	4
CC	GO:0031968	organelle outer membrane	5/43	232/19594	0.000148672	0.00553225	0.00390943	ACSL4/CISD1/CISD2/HMOX1/PTGS2	5
CC	GO:0019867	outer membrane	5/43	234/19594	0.000154748	0.00553225	0.00390943	ACSL4/CISD1/CISD2/HMOX1/PTGS2	5
CC	GO:0044754	autolysosome	2/43	11/19594	0.000255507	0.0073075	0.00516393	MAP1LC3A/NCOA4	2
CC	GO:0005677	chromatin silencing complex	2/43	13/19594	0.000361346	0.00850107	0.00600738	RB1/SIRT1	2
CC	GO:0005774	vacuolar membrane	6/43	449/19594	0.000416136	0.00850107	0.00600738	CHMP5/DPP4/MAP1LC3A/SLC2A6/SLC2A8/SLC7A5	6
CC	GO:0034045	phagophore assembly site membrane	2/43	17/19594	0.000626537	0.0111993	0.00791415	ATG5/ULK2	2
CC	GO:0044233	mitochondria-associated endoplasmic reticulum membrane	2/43	20/19594	0.000871658	0.0138497	0.00978704	ACSL4/ATG5	2
CC	GO:0005741	mitochondrial outer membrane	4/43	205/19594	0.0010434	0.0149206	0.0105438	ACSL4/CISD1/CISD2/HMOX1	4
CC	GO:0016605	PML body	3/43	105/19594	0.0015792	0.0175135	0.0123761	RB1/SIRT1/TP53	3
CC	GO:0042470	melanosome	3/43	109/19594	0.00175779	0.0175135	0.0123761	CAPG/PRDX1/SLC1A5	3
CC	GO:0048770	pigment granule	3/43	109/19594	0.00175779	0.0175135	0.0123761	CAPG/PRDX1/SLC1A5	3
CC	GO:0005765	lysosomal membrane	5/43	404/19594	0.00183708	0.0175135	0.0123761	CHMP5/DPP4/SLC2A6/SLC2A8/SLC7A5	5
CC	GO:0098852	lytic vacuole membrane	5/43	404/19594	0.00183708	0.0175135	0.0123761	CHMP5/DPP4/SLC2A6/SLC2A8/SLC7A5	5
CC	GO:0000407	phagophore assembly site	2/43	33/19594	0.00237887	0.0212611	0.0150244	ATG5/ULK2	2
CC	GO:0044232	organelle membrane contact site	2/43	41/19594	0.00365362	0.0307334	0.0217181	ACSL4/ATG5	2
CC	GO:0005667	transcription regulator complex	5/43	483/19594	0.0039665	0.0315116	0.0222681	DDIT3/EPAS1/JUN/RB1/TP53	5
CC	GO:0000421	autophagosome membrane	2/43	51/19594	0.00560264	0.0421672	0.029798	CHMP5/MAP1LC3A	2
CC	GO:0030139	endocytic vesicle	4/43	342/19594	0.00658529	0.0470848	0.0332731	ATG5/DPP4/NCF2/SLC2A8	4
CC	GO:0005637	nuclear inner membrane	2/43	61/19594	0.00793076	0.0531946	0.0375906	PTGS2/SIRT1	2
CC	GO:0000791	euchromatin	2/43	62/19594	0.00818378	0.0531946	0.0375906	JUN/SIRT1	2
CC	GO:0030027	lamellipodium	3/43	202/19594	0.00984083	0.0611843	0.0432366	CAPG/DPP4/PIK3CA	3
CC	GO:0005819	spindle	4/43	402/19594	0.011467	0.0683243	0.0482822	ATM/CAPG/CHMP5/RB1	4
CC	GO:0017053	transcription repressor complex	2/43	76/19594	0.0120976	0.069198	0.0488996	JUN/TP53	2
CC	GO:0031252	cell leading edge	4/43	416/19594	0.0128698	0.0707836	0.0500201	CAPG/DPP4/PIK3CA/TLR4	4
CC	GO:0090575	RNA polymerase II transcription regulator complex	3/43	230/19594	0.0139503	0.0714004	0.0504559	DDIT3/JUN/RB1	3
CC	GO:0005901	caveola	2/43	82/19594	0.0139805	0.0714004	0.0504559	HMOX1/PTGS2	2
CC	GO:0009925	basal plasma membrane	3/43	251/19594	0.0175851	0.086713	0.0612767	SLC1A5/SLC40A1/SLC7A5	3
CC	GO:0005811	lipid droplet	2/43	100/19594	0.0203273	0.0968935	0.068471	ACSL4/ALOX15	2
CC	GO:0045178	basal part of cell	3/43	269/19594	0.0210844	0.0972603	0.0687301	SLC1A5/SLC40A1/SLC7A5	3
CC	GO:0016363	nuclear matrix	2/43	109/19594	0.0238735	0.101162	0.0714875	MYB/TP53	2
CC	GO:1904930	amphisome membrane	1/43	11/19594	0.0238829	0.101162	0.0714875	CHMP5	1
CC	GO:0005770	late endosome	3/43	283/19594	0.0240526	0.101162	0.0714875	CHMP5/DDIT3/MAP1LC3A	3
CC	GO:0044853	plasma membrane raft	2/43	113/19594	0.0255255	0.10429	0.0736977	HMOX1/PTGS2	2
CC	GO:0044753	amphisome	1/43	13/19594	0.028165	0.111878	0.0790597	CHMP5	1
CC	GO:0000153	cytoplasmic ubiquitin ligase complex	1/43	14/19594	0.0302992	0.114021	0.080574	ATG3	1
CC	GO:0043020	NADPH oxidase complex	1/43	14/19594	0.0302992	0.114021	0.080574	NCF2	1
CC	GO:0034399	nuclear periphery	2/43	127/19594	0.0316595	0.116085	0.0820328	MYB/TP53	2
CC	GO:0045121	membrane raft	3/43	326/19594	0.034518	0.121325	0.0857358	DPP4/HMOX1/PTGS2	3
CC	GO:0098857	membrane microdomain	3/43	327/19594	0.0347855	0.121325	0.0857358	DPP4/HMOX1/PTGS2	3
CC	GO:0045335	phagocytic vesicle	2/43	138/19594	0.0368454	0.123266	0.0871076	ATG5/NCF2	2
CC	GO:0005777	peroxisome	2/43	141/19594	0.038313	0.123266	0.0871076	ACSL4/ATM	2
CC	GO:0042579	microbody	2/43	141/19594	0.038313	0.123266	0.0871076	ACSL4/ATM	2
CC	GO:0005828	kinetochore microtubule	1/43	18/19594	0.0387901	0.123266	0.0871076	CHMP5	1
CC	GO:0097038	perinuclear endoplasmic reticulum	1/43	21/19594	0.0451106	0.140235	0.0990988	CISD2	1
CC	GO:0031258	lamellipodium membrane	1/43	22/19594	0.0472084	0.143634	0.101501	DPP4	1
MF	GO:0031625	ubiquitin protein ligase binding	7/43	298/18410	5.30699e-06	0.000862623	0.00052724	CBS/CDKN1A/JUN/MAP1LC3A/RB1/TP53/TXNIP	7
MF	GO:0044389	ubiquitin-like protein ligase binding	7/43	317/18410	7.95045e-06	0.000862623	0.00052724	CBS/CDKN1A/JUN/MAP1LC3A/RB1/TP53/TXNIP	7
MF	GO:0016702	oxidoreductase activity, acting on single donors with incorporation of molecular oxygen, incorporation of two atoms of oxygen	3/43	24/18410	2.32143e-05	0.00142878	0.000873277	ALOX12/ALOX15/PTGS2	3
MF	GO:0016701	oxidoreductase activity, acting on single donors with incorporation of molecular oxygen	3/43	25/18410	2.63369e-05	0.00142878	0.000873277	ALOX12/ALOX15/PTGS2	3
MF	GO:0061629	RNA polymerase II-specific DNA-binding transcription factor binding	6/43	348/18410	0.00014763	0.00640713	0.00391607	DDIT3/EPAS1/JUN/RB1/SIRT1/TP53	6
MF	GO:0016303	1-phosphatidylinositol-3-kinase activity	2/43	10/18410	0.000236966	0.00784443	0.00479456	ATM/PIK3CA	2
MF	GO:0043522	leucine zipper domain binding	2/43	11/18410	0.000289196	0.00784443	0.00479456	DDIT3/JDP2	2
MF	GO:0055056	D-glucose transmembrane transporter activity	2/43	11/18410	0.000289196	0.00784443	0.00479456	SLC2A6/SLC2A8	2
MF	GO:0035004	phosphatidylinositol 3-kinase activity	2/43	12/18410	0.00034652	0.00835499	0.00510661	ATM/PIK3CA	2
MF	GO:0030275	LRR domain binding	2/43	16/18410	0.000626309	0.0132675	0.00810919	DDIT3/JDP2	2
MF	GO:0035497	cAMP response element binding	2/43	17/18410	0.000708765	0.0132675	0.00810919	JDP2/JUN	2
MF	GO:0140297	DNA-binding transcription factor binding	6/43	470/18410	0.000733688	0.0132675	0.00810919	DDIT3/EPAS1/JUN/RB1/SIRT1/TP53	6
MF	GO:0052742	phosphatidylinositol kinase activity	2/43	19/18410	0.000888529	0.0141841	0.00866942	ATM/PIK3CA	2
MF	GO:0008514	organic anion transmembrane transporter activity	4/43	186/18410	0.000915106	0.0141841	0.00866942	SLC1A5/SLC2A6/SLC2A8/SLC7A5	4
MF	GO:0046982	protein heterodimerization activity	5/43	332/18410	0.00101538	0.0146891	0.00897808	DDIT3/EPAS1/JDP2/TLR4/TP53	5
MF	GO:0005355	glucose transmembrane transporter activity	2/43	22/18410	0.00119497	0.0160396	0.0098035	SLC2A6/SLC2A8	2
MF	GO:0015149	hexose transmembrane transporter activity	2/43	23/18410	0.00130684	0.0160396	0.0098035	SLC2A6/SLC2A8	2
MF	GO:0051213	dioxygenase activity	3/43	93/18410	0.00133048	0.0160396	0.0098035	ALOX12/ALOX15/PTGS2	3
MF	GO:0051537	2 iron, 2 sulfur cluster binding	2/43	24/18410	0.00142353	0.0162582	0.00993711	CISD1/CISD2	2
MF	GO:0015145	monosaccharide transmembrane transporter activity	2/43	25/18410	0.00154503	0.0167635	0.010246	SLC2A6/SLC2A8	2
MF	GO:0051119	sugar transmembrane transporter activity	2/43	27/18410	0.00180233	0.0186241	0.0113832	SLC2A6/SLC2A8	2
MF	GO:0090482	vitamin transmembrane transporter activity	2/43	31/18410	0.00237361	0.0234125	0.0143098	SLC2A6/SLC2A8	2
MF	GO:0097718	disordered domain specific binding	2/43	35/18410	0.00301928	0.0284863	0.017411	RB1/TP53	2
MF	GO:0015144	carbohydrate transmembrane transporter activity	2/43	41/18410	0.00412429	0.0343583	0.021	SLC2A6/SLC2A8	2
MF	GO:0015175	neutral amino acid transmembrane transporter activity	2/43	41/18410	0.00412429	0.0343583	0.021	SLC1A5/SLC7A5	2
MF	GO:0020037	heme binding	3/43	139/18410	0.00416846	0.0343583	0.021	CBS/HMOX1/PTGS2	3
MF	GO:0001228	DNA-binding transcription activator activity, RNA polymerase II-specific	5/43	462/18410	0.004275	0.0343583	0.021	DDIT3/EPAS1/JUN/MYB/TP53	5
MF	GO:0001216	DNA-binding transcription activator activity	5/43	466/18410	0.00443361	0.0343605	0.0210013	DDIT3/EPAS1/JUN/MYB/TP53	5
MF	GO:0046906	tetrapyrrole binding	3/43	149/18410	0.00505954	0.0378593	0.0231398	CBS/HMOX1/PTGS2	3
MF	GO:0005506	iron ion binding	3/43	151/18410	0.00525047	0.0379784	0.0232126	ALOX12/ALOX15/SCD	3
MF	GO:0008509	anion transmembrane transporter activity	4/43	315/18410	0.00613935	0.0429755	0.0262668	SLC1A5/SLC2A6/SLC2A8/SLC7A5	4
MF	GO:0004601	peroxidase activity	2/43	52/18410	0.00656184	0.0431491	0.026373	PRDX1/PTGS2	2
MF	GO:0140296	general transcription initiation factor binding	2/43	52/18410	0.00656184	0.0431491	0.026373	JUN/TP53	2
MF	GO:0016684	oxidoreductase activity, acting on peroxide as acceptor	2/43	56/18410	0.00757602	0.0483529	0.0295535	PRDX1/PTGS2	2
MF	GO:0016705	oxidoreductase activity, acting on paired donors, with incorporation or reduction of molecular oxygen	3/43	177/18410	0.00813312	0.0504253	0.0308202	HMOX1/PTGS2/SCD	3
MF	GO:0015179	L-amino acid transmembrane transporter activity	2/43	61/18410	0.00893659	0.0538678	0.0329243	SLC1A5/SLC7A5	2
MF	GO:1990841	promoter-specific chromatin binding	2/43	62/18410	0.00922088	0.0540792	0.0330535	SIRT1/TP53	2
MF	GO:0106310	protein serine kinase activity	4/43	360/18410	0.0097349	0.0555914	0.0339778	ATM/EIF2AK4/PIK3CA/ULK2	4
MF	GO:0002039	p53 binding	2/43	66/18410	0.010398	0.0566433	0.0346207	SIRT1/TP53	2
MF	GO:0051536	iron-sulfur cluster binding	2/43	67/18410	0.0107022	0.0566433	0.0346207	CISD1/CISD2	2
MF	GO:0051540	metal cluster binding	2/43	67/18410	0.0107022	0.0566433	0.0346207	CISD1/CISD2	2
MF	GO:0001618	virus receptor activity	2/43	76/18410	0.0136138	0.0703381	0.042991	DPP4/SLC1A5	2
MF	GO:0140272	exogenous protein binding	2/43	77/18410	0.0139563	0.0704308	0.0430477	DPP4/SLC1A5	2
MF	GO:0005546	phosphatidylinositol-4,5-bisphosphate binding	2/43	82/18410	0.0157245	0.0775502	0.0473991	ALOX15/CAPG	2
MF	GO:0015171	amino acid transmembrane transporter activity	2/43	84/18410	0.0164573	0.0793609	0.0485058	SLC1A5/SLC7A5	2
MF	GO:0016209	antioxidant activity	2/43	85/18410	0.0168292	0.0793897	0.0485234	PRDX1/PTGS2	2
MF	GO:0004674	protein serine/threonine kinase activity	4/43	430/18410	0.0176717	0.0815905	0.0498686	ATM/EIF2AK4/PIK3CA/ULK2	4
MF	GO:0004712	protein serine/threonine/tyrosine kinase activity	4/43	446/18410	0.0199227	0.0848017	0.0518312	ATM/EIF2AK4/PIK3CA/ULK2	4
MF	GO:0001094	TFIID-class transcription factor complex binding	1/43	10/18410	0.0231185	0.0848017	0.0518312	TP53	1
MF	GO:0005381	iron ion transmembrane transporter activity	1/43	10/18410	0.0231185	0.0848017	0.0518312	SLC40A1	1
MF	GO:0008239	dipeptidyl-peptidase activity	1/43	10/18410	0.0231185	0.0848017	0.0518312	DPP4	1
MF	GO:0015173	aromatic amino acid transmembrane transporter activity	1/43	10/18410	0.0231185	0.0848017	0.0518312	SLC7A5	1
MF	GO:0016175	superoxide-generating NAD(P)H oxidase activity	1/43	10/18410	0.0231185	0.0848017	0.0518312	NCF2	1
MF	GO:0016176	superoxide-generating NADPH oxidase activator activity	1/43	10/18410	0.0231185	0.0848017	0.0518312	NCF2	1
MF	GO:0016717	oxidoreductase activity, acting on paired donors, with oxidation of a pair of donors resulting in the reduction of molecular oxygen to two molecules of water	1/43	10/18410	0.0231185	0.0848017	0.0518312	SCD	1
MF	GO:0016801	hydrolase activity, acting on ether bonds	1/43	10/18410	0.0231185	0.0848017	0.0518312	ALOX12	1
MF	GO:0031957	very long-chain fatty acid-CoA ligase activity	1/43	10/18410	0.0231185	0.0848017	0.0518312	ACSL4	1
MF	GO:0043560	insulin receptor substrate binding	1/43	10/18410	0.0231185	0.0848017	0.0518312	PIK3CA	1
MF	GO:0052813	phosphatidylinositol bisphosphate kinase activity	1/43	10/18410	0.0231185	0.0848017	0.0518312	PIK3CA	1
MF	GO:0030295	protein kinase activator activity	2/43	104/18410	0.0245551	0.0848017	0.0518312	CDKN1A/PIK3CA	2
MF	GO:0047485	protein N-terminus binding	2/43	105/18410	0.0249953	0.0848017	0.0518312	ATM/TP53	2
MF	GO:0005536	glucose binding	1/43	11/18410	0.0254014	0.0848017	0.0518312	SLC2A8	1
MF	GO:0022889	serine transmembrane transporter activity	1/43	11/18410	0.0254014	0.0848017	0.0518312	SLC1A5	1
MF	GO:0047676	arachidonate-CoA ligase activity	1/43	11/18410	0.0254014	0.0848017	0.0518312	ACSL4	1
MF	GO:0097371	MDM2/MDM4 family protein binding	1/43	11/18410	0.0254014	0.0848017	0.0518312	TP53	1
MF	GO:1902936	phosphatidylinositol bisphosphate binding	2/43	107/18410	0.0258854	0.085108	0.0520185	ALOX15/CAPG	2
MF	GO:0019209	kinase activator activity	2/43	110/18410	0.0272445	0.0882396	0.0539325	CDKN1A/PIK3CA	2
MF	GO:0004861	cyclin-dependent protein serine/threonine kinase inhibitor activity	1/43	12/18410	0.0276791	0.088329	0.0539872	CDKN1A	1
MF	GO:0019215	intermediate filament binding	1/43	13/18410	0.0299517	0.0915424	0.0559512	SIRT1	1
MF	GO:0140666	annealing activity	1/43	13/18410	0.0299517	0.0915424	0.0559512	TP53	1
MF	GO:1901338	catecholamine binding	1/43	13/18410	0.0299517	0.0915424	0.0559512	DRD4	1
MF	GO:0004467	long-chain fatty acid-CoA ligase activity	1/43	15/18410	0.0344811	0.0984219	0.060156	ACSL4	1
MF	GO:0017136	NAD-dependent histone deacetylase activity	1/43	15/18410	0.0344811	0.0984219	0.060156	SIRT1	1
MF	GO:0050664	oxidoreductase activity, acting on NAD(P)H, oxygen as acceptor	1/43	15/18410	0.0344811	0.0984219	0.060156	NCF2	1
MF	GO:0015172	acidic amino acid transmembrane transporter activity	1/43	16/18410	0.0367381	0.0984219	0.060156	SLC1A5	1
MF	GO:0015556	C4-dicarboxylate transmembrane transporter activity	1/43	16/18410	0.0367381	0.0984219	0.060156	SLC1A5	1
MF	GO:0016307	phosphatidylinositol phosphate kinase activity	1/43	16/18410	0.0367381	0.0984219	0.060156	PIK3CA	1
MF	GO:0034979	NAD-dependent protein deacetylase activity	1/43	16/18410	0.0367381	0.0984219	0.060156	SIRT1	1
MF	GO:0050135	NAD(P)+ nucleosidase activity	1/43	16/18410	0.0367381	0.0984219	0.060156	TLR4	1
MF	GO:0061809	NAD+ nucleotidase, cyclic ADP-ribose generating	1/43	16/18410	0.0367381	0.0984219	0.060156	TLR4	1
MF	GO:0070403	NAD+ binding	1/43	16/18410	0.0367381	0.0984219	0.060156	SIRT1	1
MF	GO:0001227	DNA-binding transcription repressor activity, RNA polymerase II-specific	3/43	321/18410	0.0388151	0.102272	0.062509	JDP2/JUN/TP53	3
MF	GO:0042277	peptide binding	3/43	322/18410	0.0391178	0.102272	0.062509	SLC40A1/SLC7A5/TLR4	3
MF	GO:0001217	DNA-binding transcription repressor activity	3/43	325/18410	0.0400332	0.102541	0.0626737	JDP2/JUN/TP53	3
MF	GO:0002020	protease binding	2/43	136/18410	0.0401659	0.102541	0.0626737	DPP4/TP53	2
MF	GO:0031690	adrenergic receptor binding	1/43	18/18410	0.0412367	0.102855	0.0628653	ARRDC3	1
MF	GO:1904047	S-adenosyl-L-methionine binding	1/43	18/18410	0.0412367	0.102855	0.0628653	CBS	1
MF	GO:0045296	cadherin binding	3/43	333/18410	0.0425276	0.104869	0.0640967	CAPG/CHMP5/PRDX1	3
MF	GO:0004407	histone deacetylase activity	1/43	20/18410	0.0457147	0.111462	0.0681259	SIRT1	1
MF	GO:0033558	protein lysine deacetylase activity	1/43	21/18410	0.047946	0.114333	0.0698808	SIRT1	1
MF	GO:0140416	transcription regulator inhibitor activity	1/43	21/18410	0.047946	0.114333	0.0698808	DDIT3	1

## Sheet: KEGG
Supplementary File 7. KEGG enrichment analysis results for 50 overlapping RRMS-related module genes
ID	Description	GeneRatio	BgRatio	pvalue	p.adjust	qvalue	geneID	Count
hsa04216	Ferroptosis	8/36	41/8206	5.14542e-12	9.05593e-10	5.14542e-10	ACSL4/ALOX15/ATG5/HMOX1/MAP1LC3A/NCOA4/SLC40A1/TP53	8
hsa05167	Kaposi sarcoma-associated herpesvirus infection	8/36	194/8206	1.44875e-06	0.000122999	6.98859e-05	ATG3/CDKN1A/JUN/MAP1LC3A/PIK3CA/PTGS2/RB1/TP53	8
hsa04140	Autophagy - animal	7/36	141/8206	2.09658e-06	0.000122999	6.98859e-05	ATG3/ATG5/DDIT4/EIF2AK4/MAP1LC3A/PIK3CA/ULK2	7
hsa05206	MicroRNAs in cancer	8/36	310/8206	4.54639e-05	0.00141567	0.000804359	ATM/CDKN1A/DDIT4/HMOX1/PIK3CA/PTGS2/SIRT1/TP53	8
hsa05222	Small cell lung cancer	5/36	92/8206	4.54863e-05	0.00141567	0.000804359	CDKN1A/PIK3CA/PTGS2/RB1/TP53	5
hsa04218	Cellular senescence	6/36	156/8206	5.21008e-05	0.00141567	0.000804359	ATM/CDKN1A/PIK3CA/RB1/SIRT1/TP53	6
hsa01522	Endocrine resistance	5/36	98/8206	6.16351e-05	0.00141567	0.000804359	CDKN1A/JUN/PIK3CA/RB1/TP53	5
hsa05161	Hepatitis B	6/36	162/8206	6.43487e-05	0.00141567	0.000804359	CDKN1A/JUN/PIK3CA/RB1/TLR4/TP53	6
hsa05131	Shigellosis	7/36	247/8206	8.13058e-05	0.00158998	0.000903398	ATG5/ATM/JUN/MAP1LC3A/PIK3CA/TLR4/TP53	7
hsa05211	Renal cell carcinoma	4/36	69/8206	0.000220173	0.00254589	0.00144653	CDKN1A/EPAS1/JUN/PIK3CA	4
hsa05230	Central carbon metabolism in cancer	4/36	70/8206	0.00023279	0.00254589	0.00144653	PIK3CA/SLC1A5/SLC7A5/TP53	4
hsa04137	Mitophagy - animal	4/36	72/8206	0.000259574	0.00254589	0.00144653	ATG5/JUN/MAP1LC3A/TP53	4
hsa05218	Melanoma	4/36	72/8206	0.000259574	0.00254589	0.00144653	CDKN1A/PIK3CA/RB1/TP53	4
hsa05223	Non-small cell lung cancer	4/36	72/8206	0.000259574	0.00254589	0.00144653	CDKN1A/PIK3CA/RB1/TP53	4
hsa01524	Platinum drug resistance	4/36	73/8206	0.000273767	0.00254589	0.00144653	ATM/CDKN1A/PIK3CA/TP53	4
hsa04210	Apoptosis	5/36	136/8206	0.000289727	0.00254589	0.00144653	ATM/DDIT3/JUN/PIK3CA/TP53	5
hsa05214	Glioma	4/36	75/8206	0.000303814	0.00254589	0.00144653	CDKN1A/PIK3CA/RB1/TP53	4
hsa05417	Lipid and atherosclerosis	6/36	215/8206	0.000304388	0.00254589	0.00144653	DDIT3/JUN/NCF2/PIK3CA/TLR4/TP53	6
hsa05212	Pancreatic cancer	4/36	76/8206	0.000319694	0.00254589	0.00144653	CDKN1A/PIK3CA/RB1/TP53	4
hsa05220	Chronic myeloid leukemia	4/36	76/8206	0.000319694	0.00254589	0.00144653	CDKN1A/PIK3CA/RB1/TP53	4
hsa05162	Measles	5/36	139/8206	0.000320596	0.00254589	0.00144653	EIF2AK4/JUN/PIK3CA/TLR4/TP53	5
hsa05418	Fluid shear stress and atherosclerosis	5/36	139/8206	0.000320596	0.00254589	0.00144653	HMOX1/JUN/NCF2/PIK3CA/TP53	5
hsa05140	Leishmaniasis	4/36	77/8206	0.000336162	0.00254589	0.00144653	JUN/NCF2/PTGS2/TLR4	4
hsa04136	Autophagy - other	3/36	32/8206	0.000352448	0.00254589	0.00144653	ATG3/ATG5/ULK2	3
hsa05166	Human T-cell leukemia virus 1 infection	6/36	222/8206	0.000361632	0.00254589	0.00144653	ATM/CDKN1A/JUN/PIK3CA/RB1/TP53	6
hsa05224	Breast cancer	5/36	147/8206	0.000415178	0.00281044	0.00159684	CDKN1A/JUN/PIK3CA/RB1/TP53	5
hsa05210	Colorectal cancer	4/36	86/8206	0.000512908	0.0033434	0.00189966	CDKN1A/JUN/PIK3CA/TP53	4
hsa05216	Thyroid cancer	3/36	37/8206	0.000543869	0.00340771	0.0019362	CDKN1A/NCOA4/TP53	3
hsa05160	Hepatitis C	5/36	157/8206	0.000561498	0.00340771	0.0019362	CDKN1A/EIF2AK4/PIK3CA/RB1/TP53	5
hsa04211	Longevity regulating pathway	4/36	89/8206	0.000584244	0.00342756	0.00194748	ATG5/PIK3CA/SIRT1/TP53	4
hsa05219	Bladder cancer	3/36	41/8206	0.000737227	0.00418555	0.00237815	CDKN1A/RB1/TP53	3
hsa05225	Hepatocellular carcinoma	5/36	168/8206	0.000764105	0.00420258	0.00238783	CDKN1A/HMOX1/PIK3CA/RB1/TP53	5
hsa05215	Prostate cancer	4/36	97/8206	0.000808669	0.0043129	0.00245051	CDKN1A/PIK3CA/RB1/TP53	4
hsa04621	NOD-like receptor signaling pathway	5/36	184/8206	0.00115089	0.00595757	0.00338498	ATG5/JUN/MAP1LC3A/TLR4/TXNIP	5
hsa04066	HIF-1 signaling pathway	4/36	109/8206	0.00125078	0.00628965	0.00357366	CDKN1A/HMOX1/PIK3CA/TLR4	4
hsa05169	Epstein-Barr virus infection	5/36	202/8206	0.00174241	0.00851843	0.00484002	CDKN1A/JUN/PIK3CA/RB1/TP53	5
hsa05203	Viral carcinogenesis	5/36	204/8206	0.00181976	0.00865616	0.00491827	CDKN1A/JUN/PIK3CA/RB1/TP53	5
hsa05213	Endometrial cancer	3/36	58/8206	0.00202762	0.00939108	0.00533584	CDKN1A/PIK3CA/TP53	3
hsa04110	Cell cycle	4/36	127/8206	0.00219691	0.00983492	0.00558802	ATM/CDKN1A/RB1/TP53	4
hsa04978	Mineral absorption	3/36	60/8206	0.00223521	0.00983492	0.00558802	HMOX1/MT1G/SLC40A1	3
hsa00590	Arachidonic acid metabolism	3/36	61/8206	0.00234377	0.0100611	0.00571652	ALOX12/ALOX15/PTGS2	3
hsa04213	Longevity regulating pathway - multiple species	3/36	62/8206	0.00245557	0.0100684	0.00572068	ATG5/PIK3CA/SIRT1	3
hsa04068	FoxO signaling pathway	4/36	131/8206	0.00245989	0.0100684	0.00572068	ATM/CDKN1A/PIK3CA/SIRT1	4
hsa05163	Human cytomegalovirus infection	5/36	225/8206	0.00279248	0.0111699	0.00634654	CDKN1A/PIK3CA/PTGS2/RB1/TP53	5
hsa05165	Human papillomavirus infection	6/36	331/8206	0.00287679	0.0112515	0.00639288	ATM/CDKN1A/PIK3CA/PTGS2/RB1/TP53	6
hsa04115	p53 signaling pathway	3/36	73/8206	0.00390715	0.0146597	0.00832937	ATM/CDKN1A/TP53	3
hsa05226	Gastric cancer	4/36	149/8206	0.0039148	0.0146597	0.00832937	CDKN1A/PIK3CA/RB1/TP53	4
hsa04151	PI3K-Akt signaling pathway	6/36	354/8206	0.00401379	0.0147172	0.00836206	CDKN1A/DDIT4/MYB/PIK3CA/TLR4/TP53	6
hsa04150	mTOR signaling pathway	4/36	156/8206	0.00461118	0.0165626	0.00941057	DDIT4/PIK3CA/SLC7A5/ULK2	4
hsa04012	ErbB signaling pathway	3/36	85/8206	0.00598561	0.0210693	0.0119712	CDKN1A/JUN/PIK3CA	3
hsa05235	PD-L1 expression and PD-1 checkpoint pathway in cancer	3/36	89/8206	0.00680024	0.0234675	0.0133338	JUN/PIK3CA/TLR4	3
hsa05202	Transcriptional misregulation in cancer	4/36	193/8206	0.00970303	0.0321933	0.0182917	ATM/CDKN1A/DDIT3/TP53	4
hsa05142	Chagas disease	3/36	102/8206	0.00988948	0.0321933	0.0182917	JUN/PIK3CA/TLR4	3
hsa05146	Amoebiasis	3/36	102/8206	0.00988948	0.0321933	0.0182917	PIK3CA/PRDX1/TLR4	3
hsa04064	NF-kappa B signaling pathway	3/36	104/8206	0.0104262	0.0321933	0.0182917	ATM/PTGS2/TLR4	3
hsa04620	Toll-like receptor signaling pathway	3/36	104/8206	0.0104262	0.0321933	0.0182917	JUN/PIK3CA/TLR4	3
hsa04625	C-type lectin receptor signaling pathway	3/36	104/8206	0.0104262	0.0321933	0.0182917	JUN/PIK3CA/PTGS2	3
hsa05205	Proteoglycans in cancer	4/36	205/8206	0.0119217	0.0361762	0.0205546	CDKN1A/PIK3CA/TLR4/TP53	4
hsa04668	TNF signaling pathway	3/36	112/8206	0.0127415	0.0380084	0.0215957	JUN/PIK3CA/PTGS2	3
hsa05170	Human immunodeficiency virus 1 infection	4/36	212/8206	0.0133558	0.0391771	0.0222597	ATM/JUN/PIK3CA/TLR4	4
hsa04726	Serotonergic synapse	3/36	115/8206	0.0136798	0.0394696	0.0224259	ALOX12/ALOX15/PTGS2	3
hsa04722	Neurotrophin signaling pathway	3/36	119/8206	0.0149911	0.0425555	0.0241792	JUN/PIK3CA/TP53	3
hsa04152	AMPK signaling pathway	3/36	121/8206	0.0156727	0.0435211	0.0247279	PIK3CA/SCD/SIRT1	3
hsa05208	Chemical carcinogenesis - reactive oxygen species	4/36	223/8206	0.0158259	0.0435211	0.0247279	HMOX1/JUN/NCF2/PIK3CA	4
hsa04380	Osteoclast differentiation	3/36	128/8206	0.0181953	0.0492673	0.0279928	JUN/NCF2/PIK3CA	3
hsa05135	Yersinia infection	3/36	137/8206	0.021754	0.0580105	0.0329605	JUN/PIK3CA/TLR4	3
hsa04936	Alcoholic liver disease	3/36	142/8206	0.023885	0.0627427	0.0356493	SCD/SIRT1/TLR4	3
hsa01212	Fatty acid metabolism	2/36	57/8206	0.0256787	0.0664625	0.0377628	ACSL4/SCD	2
hsa04923	Regulation of lipolysis in adipocytes	2/36	58/8206	0.0265234	0.0676539	0.0384397	PIK3CA/PTGS2	2
hsa04370	VEGF signaling pathway	2/36	59/8206	0.0273793	0.0688394	0.0391133	PIK3CA/PTGS2	2
hsa04921	Oxytocin signaling pathway	3/36	154/8206	0.0294491	0.0730005	0.0414776	CDKN1A/JUN/PTGS2	3
hsa04932	Non-alcoholic fatty liver disease	3/36	155/8206	0.0299414	0.07319	0.0415852	DDIT3/JUN/PIK3CA	3
hsa05217	Basal cell carcinoma	2/36	63/8206	0.0309131	0.0745303	0.0423467	CDKN1A/TP53	2
hsa04217	Necroptosis	3/36	159/8206	0.0319543	0.0759995	0.0431815	ALOX15/CHMP5/TLR4	3
hsa05321	Inflammatory bowel disease	2/36	65/8206	0.0327446	0.0768407	0.0436595	JUN/TLR4	2
hsa05031	Amphetamine addiction	2/36	69/8206	0.0365326	0.0846019	0.0480692	JUN/SIRT1	2
