# Supplementary material for: Identification of Key Ferroptosis-Related Genes in the Peripheral Blood of Patients with Relapsing-Remitting Multiple Sclerosis and Its Diagnostic Value
Source: Int J Mol Sci. 2023 Mar 29;24(7):6399. doi: 10.3390/ijms24076399 (PMC10094542; doi:10.3390/ijms24076399)
Supplement: Supplementary file 1 [file ijms-24-06399-s001.zip › Supplementary File 9.xlsx]

## Sheet: Sheet1
Supplementary File 9. The table of 259 ferroptosis-related genes.
ABCC1
ACO1
ACSF2
ACSL3
ACSL4
ACVR1B
AGPAT3
AIFM2
AKR1C1
AKR1C2
AKR1C3
ALB
ALOX12
ALOX12B
ALOX15
ALOX15B
ALOX5
ALOXE3
ANGPTL7
ANO6
ARNTL
ARRDC3
ASNS
ATF3
ATF4
ATG13
ATG16L1
ATG3
ATG4D
ATG5
ATG7
ATM
ATP5MC3
ATP6V1G2
AURKA
BACH1
BAP1
BECN1
BID
BLOC1S5-TXNDC5
BNIP3
BRD4
CA9
CAPG
CARS1
CAV1
CBS
CD44
CDKN1A
CDKN2A
CDO1
CEBPG
CHAC1
CHMP5
CHMP6
CISD1
CISD2
CS
CXCL2
CYBB
DDIT3
DDIT4
DNAJB6
DPP4
DRD4
DRD5
DUOX1
DUOX2
DUSP1
EGFR
EGLN2
EIF2AK4
EIF2S1
ELAVL1
EMC2
ENPP2
EPAS1
FADS2
FANCD2
FBXW7
Fer1HCH
FH
FLT3
FTH1
FTL
FTMT
G6PD
G6PDX
GABARAPL1
GABARAPL2
GABPB1
GCH1
GCLC
GDF15
GLS2
GLUT13
GOT1
GPT2
GPX2
GPX4
HAMP
HBA1
HELLS
HERPUD1
HIC1
HIF1A
HILPDA
HMGB1
HMOX1
HNF4A
HRAS
HSD17B11
HSF1
HSPA5
HSPB1
IDH1
IFNG
IL33
IL6
IREB2
ISCU
JDP2
JUN
KEAP1
KIM-1
KLHL24
KRAS
LAMP2
LINC00336
LINC00472
LOC284561
LOC390705
LONP1
LPCAT3
LPIN1
LURAP1L
MAFG
MAP1LC3A
MAP3K5
MAPK1
MAPK14
MAPK3
MAPK8
MAPK9
MIOX
MIR137
MIR17
MIR212
MIR30B
MIR4715
MIR6852
MIR9-1
MIR9-2
MIR9-3
MT1G
MT3
MTDH
MTOR
MUC1
MYB
NCF2
NCOA4
NF2
NFE2L2
NFS1
NGB
NNMT
NOS2
NOX1
NOX3
NOX4
NOX5
NQO1
NRAS
OTUB1
OXSR1
PANX1
PCK2
PEBP1
PGD
PHKG2
PIK3CA
PLIN2
PLIN4
PML
PRDX1
PRDX6
PRKAA1
PRKAA2
PROM2
PSAT1
PTGS2
RB1
RELA
RGS4
RIPK1
RPL8
RRM2
SAT1
SCD
SCP2
SELENOS
SESN2
SETD1B
SIRT1
SLC1A4
SLC1A5
SLC2A1
SLC2A12
SLC2A14
SLC2A3
SLC2A6
SLC2A8
SLC38A1
SLC3A2
SLC40A1
SLC7A11
SLC7A5
SNORA16A
SNX4
SOCS1
SP1
SQSTM1
SRC
SRXN1
STAT3
STEAP3
STMN1
TAZ
TF
TFAP2C
TFR2
TFRC
TGFBR1
TLR4
TMBIM4
TNFAIP3
TP53
TP63
TRIB3
TSC22D3
TUBE1
TXNIP
TXNRD1
UBC
ULK1
ULK2
VDAC2
VEGFA
VLDLR
WIPI1
WIPI2
XBP1
YWHAE
YY1AP1
ZEB1
ZFP36
ZFP69B
ZNF419
